# Supplementary material for: Integrative analysis of gut microbiota composition, host colonic gene expression and intraluminal metabolites in aging C57BL/6J mice
Source: Aging (Albany NY). 2018 May 16;10(5):930–50. doi: 10.18632/aging.101439 (PMC5990381; doi:10.18632/aging.101439)
Supplement: Data Set S1 [file aging-10-101439-s003.xlsx]

## Sheet: Sheet1
Age (weeks)	Mouse nr	Cause of death/observations during section	Multiple	Ulcerative	Tumour	Unknown	Others
36	A58	Too heavily mutulated at the skin, mouse has been killed					1
69	AA3	Mouse was found dead in its cage for 1-2 days. A middle-sized bladderstone was found.				1
71	AA7	Open wound at side flank and severe weight loss. Mouse was taken out from the study. Big liver tumours.	1
81	AA12	Deep neckwound, mouse was taken out from study. No abnormal conditions found in organs.		1
82	AA14	Weak, shaking and inactive mouse and was taken out from study. Two liver tumours, yellow liver and extremely enlarged spleen and mesenteric lymph nodes.			1
82	AA57	Severe open wound. Mouse was taken out from study. No abnormal conditions in organs.		1
84	AA61	Severe weight loss. The accumulated loss of weight was more than 5 grams. No abnormal conditions found in organs, although the seminal vesicle was enlarged.					1
87	AA16	Mouse was found dead in its cage.				1
87	AA19	Mouse was weak and suffered from weight loss, so it was taken out of the study. Seminal vesicle and heart were enlarged.					1
87	AA2	Mouse was found dead. Neck and ear wound and bulging right eye. Left ramshoorn was enlarged and brown colored, lungs had some red spots, a lot of blood clots were found in the abdomen.	1
88	AA50	Mouse was found dead, unknown cause.				1
94	AA26	Mouse was found dead in the cage. The right ramshoorn was enlarged and the liver had a large tumour. Hydronephrosis in left kidney.			1
94	AA51	Severe weakness and inactiveness. Gradual weight loss. Spleen was extremely enlarged. The liver was at normal size, but the it was spotted and brownish.	1
95	AA36	Mouse was found dead in the cage. Both eyes seemed inflamed. The right epididimal fat was dark red.	1
95	AA58	Severe neckwounds and weight loss. Spleen and heart were slightly enlarged.		1
97	AA25	Ear wound (left) was not healing and getting bigger. Weight loss. The spleen was enlarged with dark red spots. The liver was extremely enlarged with tumour. Abnormal colour of liver, kidneys, lungs and pancreas.		1
101	AA53	Dead in the cage. Yellow liquid in the cavity, a lot of fat. Left ramshoorn was enlarged and reddish-purple colored. Small spleen, enlarged heart.	1
102	AA31	Found dead in the cage. No major cause indicated.				1
103	AA48	Multiple wounds (ear, shoulder, neck). Enlarged seminal vesicle, heart and spleen. Pale kidney.		1
104	AA4	Mouse died during anaesthesia. Severe weakness and shaking, emaciated, pale paws and tail. Both the seminal vesical and ramshoorn were enlarged and discolored.				1
104	AA8	Slow, emaciated, extreme weight loss, shaking. Enlarged left seminal vesical. A lung tumour with 0.5 cm diameter was found.	1				1
			6	5	2	5	4
