# Supplementary material for: Integrative analysis of gut microbiota composition, host colonic gene expression and intraluminal metabolites in aging C57BL/6J mice
Source: Aging (Albany NY). 2018 May 16;10(5):930–50. doi: 10.18632/aging.101439 (PMC5990381; doi:10.18632/aging.101439)
Supplement: Data Set S2 [file aging-10-101439-s004.xlsx]

## Sheet: Sheet1
6vs28 months					6vs24 months					6vs12 months
Gene	Entrez ID	Limma (log2 based) Fold Change	IBMT q-value		Gene	Entrez ID	Limma (log2 based) Fold Change	IBMT q-value		Gene	Entrez ID	Limma (log2 based) Fold Change	IBMT q-value
Sfrp1	20377	6.37564	2.00272e-09		Sfrp1	20377	5.60739	1.09147e-08		Ighg1	16017	12.2045	0.00110365
Rgs5	19737	5.89959	1.41763e-08		Hhip	15245	4.87793	1.1005e-09		Igkv8-24	677858	11.9822	0.00557939
Serpina3n	20716	5.52876	1.62061e-08		Rgs5	19737	4.53425	2.9408e-07		Igkv4-91	434033	8.31421	0.00116839
Scn7a	20272	5.38128	1.02618e-08		Mmrn1	70945	4.35698	8.88589e-07		Igkv2-109	628268	7.34	0.003459
Cnn1	12797	5.24042	0.00928463		Serpina3n	20716	4.32597	3.13189e-07		Sfrp1	20377	6.84206	1.54112e-09
Hhip	15245	5.13928	1.69145e-10		Scn7a	20272	4.24744	2.06481e-07		Mmrn1	70945	5.1436	1.43271e-07
Fabp6	16204	4.87298	5.49684e-05		Ms4a4d	66607	4.10128	3.27758e-09		Aspn	66695	5.0548	6.78599e-09
Ms4a4d	66607	4.78418	3.02988e-10		Ighg2b	16016	4.02758	0.000140414		Igkv4-69	628541	4.99209	0.00672918
Myh11	17880	4.7193	0.000337286		Fabp6	16204	3.82707	0.000540014		Serpina3n	20716	4.97442	5.90897e-08
Pgm5	226041	4.69089	0.00056289		Emcn	59308	3.81113	1.83078e-09		Rgs5	19737	4.94401	9.75841e-08
Mmrn1	70945	4.67611	2.8781e-07		Aspn	66695	3.6854	2.53315e-07		Ighg2b	16016	4.90178	2.29321e-05
Eltd1	170757	4.39394	4.39003e-11		Dcn	13179	3.63301	1.57208e-07		Ms4a4d	66607	4.8226	5.01305e-10
Igfbp5	16011	4.32617	3.1503e-08		Ighg2c	404711	3.52528	0.00786205		Hhip	15245	4.66253	6.94177e-10
Emcn	59308	4.28943	2.33093e-10		Igfbp5	16011	3.46102	6.77947e-07		Scn7a	20272	4.53857	7.51622e-08
Plvap	84094	4.26696	2.1014e-10		Postn	50706	3.46076	1.83078e-09		Iglv1	16142	4.52413	0.00109099
Aspn	66695	4.24109	2.89782e-08		Ccl11	20292	3.45516	1.54512e-09		Emcn	59308	4.38279	4.01025e-10
Myl9	98932	4.23417	0.00102445		Acta2	11475	3.44515	0.000757939		Plvap	84094	4.24366	4.64348e-10
Dcn	13179	4.22173	1.50517e-08		Lama2	16773	3.40532	1.29925e-08		Postn	50706	4.15944	2.45481e-10
Ccl11	20292	4.19499	5.08404e-11		Eltd1	170757	3.34379	1.83078e-09		Edil3	13612	4.13758	2.09611e-09
Acta2	11475	4.16016	0.000113712		Plvap	84094	3.32177	8.00016e-09		Ccl11	20292	4.05517	1.7976e-10
Lama2	16773	4.13685	6.619e-10		Edil3	13612	3.31442	5.18204e-08		Igkv4-57	235952	3.90318	0.0014197
Edil3	13612	4.08371	1.82261e-09		Mfap4	76293	3.31388	5.71182e-07		Lepr	16847	3.89491	4.64627e-10
Postn	50706	4.06737	1.34532e-10		Pgm5	226041	3.27691	0.00820822		Lama2	16773	3.89123	1.86689e-09
Fmo2	55990	4.03773	3.54321e-08		Lepr	16847	3.27061	4.51101e-09		Eltd1	170757	3.87256	3.08814e-10
Tagln	21345	4.00949	0.00122644		Igfbp7	29817	3.25581	2.84192e-09		Igfbp5	16011	3.713	2.31072e-07
Mfap4	76293	3.98693	3.54321e-08		Mnda	381308	3.23844	0.000727718		Grem2	23893	3.71106	3.06959e-07
Igfbp7	29817	3.98564	1.27289e-10		C1s1	50908	3.22167	2.37242e-05		Igfbp7	29817	3.70697	4.84009e-10
Grem1	23892	3.9372	1.13224e-05		Myl9	98932	3.17383	0.00922539		Igfbp3	16009	3.68493	1.43412e-08
Dpt	56429	3.85962	3.77193e-08		Cd34	12490	3.15449	1.78714e-09		Mfap4	76293	3.6831	1.19535e-07
Lepr	16847	3.81605	3.02988e-10		Grem2	23893	3.12848	3.05499e-06		Igkv2-137	692187	3.64753	0.00187332
Igfbp3	16009	3.81574	6.34076e-09		Igfbp3	16009	3.08958	1.91477e-07		Rarres2	71660	3.64686	5.34967e-09
Sparcl1	13602	3.79852	4.08944e-08		Rarres2	71660	3.07495	6.82514e-08		Dpt	56429	3.63437	1.03892e-07
Ighg2b	16016	3.79057	0.000179623		Cdh5	12562	3.05372	2.84192e-09		Fmo2	55990	3.55678	2.06354e-07
Cdh5	12562	3.74727	1.14006e-10		Dpt	56429	3.04925	1.21193e-06		Acta2	11475	3.55249	0.00055482
Mir145a	387163	3.69779	3.08052e-06		Zeb2	24136	2.99398	7.58922e-09		Dcn	13179	3.54048	1.49992e-07
Flna	192176	3.69709	1.22043e-05		Bgn	12111	2.92578	4.90158e-09		Ighg2c	404711	3.46048	0.0073236
C1s1	50908	3.67889	3.60137e-06		Fmo2	55990	2.91968	3.27863e-06		Podxl	27205	3.43897	1.0381e-10
Cd34	12490	3.6677	1.14006e-10		Entpd1	12495	2.89197	6.12146e-08		Eng	13805	3.43401	1.0381e-10
Ptprb	19263	3.62457	4.39003e-11		Fxyd1	56188	2.88791	4.68609e-06		Serping1	12258	3.37921	1.01575e-08
Rarres2	71660	3.58181	4.2927e-09		Tgfbr3	21814	2.86307	5.48049e-08		Cdh5	12562	3.35156	6.64433e-10
Zeb2	24136	3.57153	3.55695e-10		Sparcl1	13602	2.85527	2.67481e-06		Grem1	23892	3.29731	9.14326e-05
Bgn	12111	3.56966	1.78365e-10		Cd36	12491	2.84384	5.86705e-06		Pgm5	226041	3.28915	0.00674269
Eng	13805	3.52488	2.18426e-11		Podxl	27205	2.81054	1.54512e-09		Zeb2	24136	3.2814	1.62503e-09
Podxl	27205	3.51685	2.98264e-11		Gpr116	224792	2.7904	7.56378e-10		C1s1	50908	3.24632	2.02758e-05
Mnda	381308	3.48511	0.000289677		Serping1	12258	2.78996	2.06481e-07		Myh11	17880	3.24476	0.00535387
Gpr116	224792	3.46568	1.35575e-11		Abi3bp	320712	2.7619	4.98671e-06		Myl9	98932	3.21842	0.00703901
Cyyr1	224405	3.46293	2.99846e-10		Ogn	18295	2.75564	0.000136716		Cyyr1	224405	3.21536	1.22031e-09
Fn1	14268	3.46285	1.22043e-05		Fam198b	68659	2.73014	8.35594e-10		Tgfbr3	21814	3.2136	6.88076e-09
Chrm2	243764	3.42375	0.00851452		Cyyr1	224405	2.71697	1.91552e-08		Bmp4	12159	3.21106	4.0354e-09
Flt1	14254	3.42348	7.72629e-10		Flna	192176	2.70433	0.000522443		Sparcl1	13602	3.21042	4.431e-07
Cd36	12491	3.41057	3.54865e-07		Ptprb	19263	2.6961	4.89825e-09		Bgn	12111	3.20905	1.14929e-09
Adam23	23792	3.39809	1.58819e-08		Flt1	14254	2.68237	5.67654e-08		Osmr	18414	3.18465	8.05359e-09
Fxyd1	56188	3.32656	4.95252e-07		Stab1	192187	2.67027	7.58922e-09		Gpx8	69590	3.18027	6.53614e-07
Abi3bp	320712	3.31726	2.74763e-07		Axl	26362	2.67006	8.82933e-08		Bmp5	12160	3.15561	5.32828e-09
Ltbp4	108075	3.30208	6.36698e-10		Eng	13805	2.66699	1.78714e-09		Fxyd1	56188	3.13645	1.36447e-06
Tgfbr3	21814	3.29357	3.46517e-09		AI607873	226691	2.65741	2.08499e-06		Entpd1	12495	3.11127	1.49502e-08
Serping1	12258	3.28513	1.04797e-08		Tmem47	192216	2.65086	0.000206272		Flt1	14254	3.10176	4.55662e-09
Svep1	64817	3.26964	3.56025e-09		Adamdec1	58860	2.64813	1.42122e-07		Igsf10	242050	3.09905	1.43715e-07
Stab1	192187	3.26175	2.1014e-10		Cfh	12628	2.61754	9.97074e-07		Igj	16069	3.09293	0.00164483
Abca8a	217258	3.24999	1.08703e-08		Osmr	18414	2.59436	2.2199e-07		Stab1	192187	3.08593	7.48197e-10
Axl	26362	3.22575	2.91429e-09		Cped1	214642	2.5891	8.82933e-08		F630028O10Rik	100038363	3.07464	4.83461e-08
Entpd1	12495	3.21981	6.34076e-09		Adam23	23792	2.58073	1.35828e-06		Axl	26362	3.07462	8.05359e-09
Casq2	12373	3.2082	6.98482e-09		Efemp1	216616	2.56871	2.5805e-06		Tmem47	192216	3.07162	3.09227e-05
Sparc	20692	3.17894	2.61443e-08		Foxf1	15227	2.56547	6.31695e-07		Ogn	18295	3.06235	3.52381e-05
Cav1	12389	3.17297	1.73782e-06		Fhl5	57756	2.56124	5.18204e-08		Cd34	12490	3.04482	1.62503e-09
Fam198b	68659	3.12299	2.98264e-11		Casq2	12373	2.55924	3.74852e-07		Flna	192176	3.02852	0.000135477
Pcp4l1	66425	3.11537	0.000622058		Ltbp4	108075	2.55474	6.12146e-08		Foxf1	15227	3.02136	4.2199e-08
Cald1	109624	3.10569	5.00371e-05		Mrc1	17533	2.55209	2.06481e-07		Tagln	21345	3.0109	0.00918117
AI607873	226691	3.09372	1.43015e-07		Mxra8	74761	2.5452	1.81533e-06		Gpx3	14778	3.0078	2.39118e-08
Pdlim3	53318	3.09307	0.000555824		Svep1	64817	2.53223	2.9408e-07		Sparc	20692	3.00273	7.65289e-08
Osmr	18414	3.08583	8.77484e-09		Grem1	23892	2.53098	0.00157768		Abca8a	217258	2.99066	4.68204e-08
Bmp5	12160	3.08346	4.53995e-09		Rhoj	80837	2.52851	1.68415e-06		Ptprb	19263	2.98359	8.4155e-10
Kdr	16542	3.0751	3.52003e-10		Sparc	20692	2.52354	1.32415e-06		Mxra8	74761	2.96893	1.41842e-07
Fgf7	14178	3.07287	9.20862e-09		Igf1	16000	2.52328	3.11408e-07		Gpr116	224792	2.96242	1.0381e-10
Rhoj	80837	3.06831	5.50826e-08		Abca8a	217258	2.5153	8.24964e-07		Adamdec1	58860	2.96106	1.85092e-08
Foxf1	15227	3.04823	2.73335e-08		Cd209f	69142	2.51217	8.80271e-07		Svep1	64817	2.93293	2.36568e-08
Fstl1	14314	3.03286	1.58819e-08		Ifi205	226695	2.50258	0.000262889		Fhl5	57756	2.93083	4.04266e-09
Cped1	214642	3.02774	4.08531e-09		Bmp4	12159	2.49341	2.2199e-07		Pappa	18491	2.93063	1.05495e-07
Igsf10	242050	3.00601	1.75024e-07		Bmp5	12160	2.49251	2.38696e-07		Cav1	12389	2.91995	6.58083e-06
Grem2	23893	3.00182	3.91098e-06		Kdr	16542	2.47787	2.2553e-08		Fn1	14268	2.91619	0.000111448
Cfh	12628	2.98839	8.93258e-08		Pdgfra	18595	2.47585	4.91681e-07		Pdgfra	18595	2.91602	2.92533e-08
Ogn	18295	2.97892	3.97332e-05		Gpx8	69590	2.47238	2.86766e-05		Kdr	16542	2.88987	1.40602e-09
Gria3	53623	2.97131	4.7799e-08		Cav1	12389	2.46704	7.96405e-05		Tcf21	21412	2.88848	1.85477e-07
Tmem47	192216	2.97121	3.77191e-05		Abcc9	20928	2.45796	2.67355e-06		Wnt2b	22414	2.88822	4.93373e-09
Mustn1	66175	2.9652	6.189e-05		Gpx3	14778	2.45498	6.9151e-07		Ltbp4	108075	2.88464	6.50106e-09
C4b	12268	2.95546	2.18426e-11		F630028O10Rik	100038363	2.44612	2.06505e-06		Tnc	21923	2.88397	2.15443e-07
Mxra8	74761	2.95279	1.14226e-07		Mustn1	66175	2.44058	0.000819653		Fbln1	14114	2.88013	9.75841e-08
Cd300lg	52685	2.95153	3.82501e-10		Fn1	14268	2.43009	0.00098092		Rhoj	80837	2.87352	1.85477e-07
Ddr2	18214	2.92862	3.78256e-07		Wnt2b	22414	2.42923	1.03914e-07		C1qc	12262	2.87041	2.36568e-08
Pdgfra	18595	2.92306	2.05468e-08		Lcn2	16819	2.41077	0.00625958		Efemp1	216616	2.86638	3.94653e-07
Abcc9	20928	2.91856	1.14226e-07		Igsf10	242050	2.41064	7.65683e-06		Col12a1	12816	2.86112	9.75841e-08
Lum	17022	2.90583	3.46494e-07		Pcdhb16	93887	2.40919	6.12146e-08		Lama4	16775	2.83801	2.57905e-08
Cd209f	69142	2.89856	5.99559e-08		Gria3	53623	2.40441	2.16558e-06		Fgf7	14178	2.83497	4.2199e-08
Fhl5	57756	2.88082	3.46517e-09		Mir145a	387163	2.39784	0.000764984		Mustn1	66175	2.82457	0.000137099
Kcnmb1	16533	2.87391	0.00242543		Pdlim3	53318	2.38513	0.00799064		Pdlim3	53318	2.80705	0.00159673
Efemp1	216616	2.8727	3.03009e-07		Ednra	13617	2.38223	8.19998e-07		Cped1	214642	2.79942	1.81336e-08
Lama4	16775	2.87217	1.57857e-08		C1qc	12262	2.38157	6.10446e-07		Abi3bp	320712	2.79514	3.81811e-06
Flnc	68794	2.86397	0.00909245		Ddr2	18214	2.37922	1.45071e-05		Adam23	23792	2.7798	3.47556e-07
Fbln1	14114	2.84562	8.99738e-08		C3ar1	12267	2.3738	1.32415e-06		Mrc1	17533	2.76028	4.36162e-08
Igf1	16000	2.84208	2.75156e-08		Lama4	16775	2.37315	6.03293e-07		Antxr1	69538	2.7582	1.22122e-07
Cdh19	227485	2.83875	8.15286e-06		Sgce	20392	2.36798	4.98671e-06		Fam198b	68659	2.75683	3.08814e-10
Pcdhb16	93887	2.83066	2.08882e-09		Reln	19699	2.3574	4.91099e-05		Ednra	13617	2.74966	6.05085e-08
Ifi205	226695	2.82855	4.08329e-05		Gabra3	14396	2.35303	2.9408e-07		Reln	19699	2.71355	5.03124e-06
Cxcl12	20315	2.82543	1.14006e-10		C4b	12268	2.34794	1.54512e-09		Mir145a	387163	2.71167	0.000162667
Slfn5	327978	2.82108	2.24297e-09		Cd93	17064	2.34212	1.01311e-07		AI607873	226691	2.70928	1.36421e-06
Gpx3	14778	2.81009	4.74575e-08		Cald1	109624	2.33983	0.0017141		Pcdh7	54216	2.70489	8.76184e-09
Myocd	214384	2.80754	4.31923e-06		Fstl1	14314	2.3194	1.91133e-06		C1qb	12260	2.703	2.70906e-08
Antxr1	69538	2.79776	7.68446e-08		Lgals1	16852	2.31854	3.25384e-05		Prex2	109294	2.67791	1.17076e-09
Tpm2	22004	2.79313	0.00734203		Fbln1	14114	2.31496	3.97545e-06		Mmp2	17390	2.67615	1.43715e-07
Adamdec1	58860	2.77823	3.54321e-08		Fgf7	14178	2.30824	1.49235e-06		Gria3	53623	2.66877	3.25233e-07
Pcdh7	54216	2.75566	4.41805e-09		C1qb	12260	2.28764	5.93538e-07		Lgals1	16852	2.66812	3.16458e-06
Tns1	21961	2.75322	5.74699e-05		Cxcl12	20315	2.28558	7.58922e-09		Abcc9	20928	2.66621	6.13561e-07
Esam	69524	2.75168	9.35259e-10		Gucy1a3	60596	2.2828	2.52594e-06		Mnda	381308	2.66496	0.00364618
Ecm1	13601	2.73288	2.46958e-08		Islr	26968	2.26082	2.16243e-05		Iglv3	404743	2.66469	0.000594215
Gucy1a3	60596	2.71712	8.57912e-08		Enpp2	18606	2.24884	0.000842072		Cd93	17064	2.65666	8.43708e-09
Wnt2b	22414	2.70071	9.20862e-09		Ldb2	16826	2.24681	6.19577e-06		Ddr2	18214	2.60509	2.93259e-06
Bmp4	12159	2.69398	3.50018e-08		Tcf21	21412	2.23811	1.45648e-05		Igf1	16000	2.60419	1.43271e-07
Lgals1	16852	2.6938	2.19038e-06		Slfn5	327978	2.22193	2.46388e-07		Ggt5	23887	2.60369	3.90681e-08
F630028O10Rik	100038363	2.68185	2.95089e-07		Pcdh7	54216	2.21697	3.67923e-07		Enpp2	18606	2.59363	0.000125216
Tcf21	21412	2.67184	4.97927e-07		Ggt5	23887	2.2123	8.22025e-07		Leprel1	210530	2.59079	6.79511e-06
Prex2	109294	2.66766	7.72629e-10		Flt4	14257	2.21143	2.08026e-06		C3ar1	12267	2.58856	2.45295e-07
Synpo2	118449	2.66243	0.00941386		Cd300lg	52685	2.20978	1.0907e-07		Islr	26968	2.57356	2.17118e-06
Fam26e	103511	2.65304	2.13121e-06		Nrp1	18186	2.20637	1.03914e-07		Crip2	68337	2.57286	1.42829e-09
Fermt2	218952	2.64599	1.16573e-05		P2ry14	140795	2.20316	2.05825e-06		Cald1	109624	2.55872	0.000585849
Ednra	13617	2.64301	8.99738e-08		Jam2	67374	2.19951	6.9824e-06		Lum	17022	2.55772	3.20661e-06
Jam2	67374	2.64026	1.93609e-07		Antxr1	69538	2.19083	7.21675e-06		Ms4a4a	666907	2.54041	3.05734e-06
Sgce	20392	2.62959	6.23761e-07		Cygb	114886	2.18461	2.9408e-07		Nid1	18073	2.53947	1.09181e-07
Ctgf	14219	2.6295	4.20774e-06		Nid1	18073	2.18206	2.08026e-06		2610203C20Rik	100042464	2.53842	8.40761e-06
Npr2	230103	2.62657	3.34267e-08		Lum	17022	2.18175	5.12582e-05		Jam2	67374	2.53492	4.83391e-07
Flt4	14257	2.61697	6.72717e-08		Fam26e	103511	2.17994	7.31967e-05		Ednrb	13618	2.53098	2.98046e-07
Reln	19699	2.61181	7.48665e-06		2610203C20Rik	100042464	2.1722	0.000116456		Flt4	14257	2.52026	1.61815e-07
Igfbp4	16010	2.61121	8.35084e-08		Myocd	214384	2.16447	0.000298205		Fcgr2b	14130	2.51736	6.32325e-07
Meis2	17536	2.60462	0.000612589		Crip2	68337	2.16247	5.48049e-08		Cxcl12	20315	2.50682	1.14929e-09
Mrc1	17533	2.60404	8.35084e-08		Prex2	109294	2.16157	7.37332e-08		Fstl1	14314	2.50219	4.07297e-07
Tnc	21923	2.58412	9.99371e-07		Ednrb	13618	2.15458	6.30162e-06		Lrrc32	434215	2.48376	2.92533e-08
Slc43a3	58207	2.57703	7.08841e-08		Igfbp4	16010	2.14487	4.27925e-06		Nrp1	18186	2.48305	8.65226e-09
Nid1	18073	2.57521	6.70571e-08		Slc43a3	58207	2.14393	3.03541e-06		Sgce	20392	2.46655	2.26766e-06
Gabra3	14396	2.56657	3.75941e-08		Npr2	230103	2.13664	2.16558e-06		Kcnmb1	16533	2.46592	0.00895198
Islr	26968	2.56389	1.89664e-06		Esam	69524	2.12863	1.91477e-07		Hsd11b1	15483	2.46132	1.39747e-07
C130026I21Rik	620078	2.56208	0.00464195		Fcgr2b	14130	2.12851	1.50628e-05		Lcn2	16819	2.43529	0.00478488
Tacr2	21337	2.55993	0.00515487		Hsd11b1	15483	2.12134	2.66043e-06		Pltp	18830	2.42638	6.53829e-09
Pltp	18830	2.55975	1.82261e-09		Leprel1	210530	2.11792	0.000188929		Col6a1	12833	2.42043	4.68204e-08
Pappa	18491	2.555	7.23728e-07		Mpeg1	17476	2.11656	8.88589e-07		Cd300lg	52685	2.41047	1.57956e-08
Pecam1	18613	2.55479	6.619e-10		Dab2	13132	2.10755	2.66043e-06		P2ry14	140795	2.40006	3.47546e-07
Sdpr	20324	2.54789	4.07724e-06		Timp3	21859	2.10007	4.37319e-06		Cygb	114886	2.39859	4.07391e-08
Gpx8	69590	2.54643	1.40715e-05		Cytl1	231162	2.09527	1.5537e-07		Lrrc8c	100604	2.39858	6.50106e-09
Cytl1	231162	2.54272	2.08882e-09		Pappa	18491	2.091	3.52882e-05		Tacr2	21337	2.39741	0.00920213
Pcdhb18	93889	2.54125	1.78365e-10		Cxcl13	55985	2.09047	0.000559541		Ldb2	16826	2.39698	1.76616e-06
Tek	21687	2.53465	2.50823e-09		Clec9a	232414	2.08631	3.85078e-05		Gucy1a3	60596	2.38607	9.95104e-07
Cml2	93673	2.53413	6.73342e-07		Tnc	21923	2.08626	5.71164e-05		Fndc1	68655	2.38553	1.26702e-07
Leprel1	210530	2.52603	8.30014e-06		Emr1	13733	2.08403	5.02456e-07		Cdh11	12552	2.38358	4.02476e-06
Cd93	17064	2.52555	1.41983e-08		Apoe	11816	2.08104	6.12146e-08		Rcn3	52377	2.36886	1.58204e-06
Crip2	68337	2.52472	1.34972e-09		Pecam1	18613	2.07709	7.27464e-08		Tm4sf1	17112	2.36129	4.98514e-08
Fbln2	14115	2.50989	9.35259e-10		Pltp	18830	2.0669	1.97586e-07		Apoe	11816	2.35311	4.0354e-09
Timp3	21859	2.50803	1.07414e-07		Ms4a4a	666907	2.06245	0.000118193		Podn	242608	2.34848	6.20178e-07
Ptrf	19285	2.50368	1.65072e-06		Plxdc2	67448	2.06099	6.71622e-07		Slc43a3	58207	2.34759	4.52987e-07
Nrp1	18186	2.50272	4.94018e-09		Tm4sf1	17112	2.0549	9.3933e-07		Tek	21687	2.34161	1.43412e-08
Lcn2	16819	2.50183	0.00348271		Hgf	15234	2.05338	0.00232606		Lhfp	108927	2.33763	1.76426e-06
Mgp	17313	2.50116	6.63647e-05		Col6a1	12833	2.05018	1.44317e-06		Pcp4l1	66425	2.33168	0.00903838
Cygb	114886	2.49702	1.45701e-08		Mamdc2	71738	2.04215	4.37319e-06		Lyve1	114332	2.32979	1.30631e-05
Lims2	225341	2.48706	5.3675e-05		Vsig2	57276	2.04082	7.58922e-09		Cfh	12628	2.32789	6.40953e-06
Lhfp	108927	2.47623	4.9664e-07		Cml2	93673	2.0398	4.74056e-05		Vcan	13003	2.32686	3.64403e-06
Ldb2	16826	2.47588	8.02942e-07		Gucy1b3	54195	2.03481	0.000206272		Dab2	13132	2.32536	3.34341e-07
Ednrb	13618	2.46902	3.64101e-07		Ltbp1	268977	2.03417	8.5282e-08		Emr1	13733	2.32149	4.60594e-08
Lrrc8c	100604	2.46308	2.77149e-09		Lrrc32	434215	2.03023	1.70917e-06		Npr2	230103	2.31141	3.95032e-07
Enpp2	18606	2.45887	0.000204804		Pcdhb18	93889	2.02946	3.10818e-08		Serpinh1	12406	2.30981	1.93665e-07
Ehd2	259300	2.44328	7.7869e-07		F2r	14062	2.02657	4.44815e-07		Myocd	214384	2.30803	0.000103735
Wfdc1	67866	2.4363	4.88661e-07		Ms4a6c	73656	2.02434	4.49427e-05		Casq2	12373	2.30626	1.86828e-06
Col12a1	12816	2.43342	1.0944e-06		F13a1	74145	2.02405	7.11591e-07		Ehd2	259300	2.30501	2.78635e-06
Glp2r	93896	2.43309	2.02277e-08		Fermt2	218952	2.02331	0.000822562		Mamdc2	71738	2.301	3.47556e-07
Lrrc32	434215	2.43216	3.14175e-08		Ccdc80	67896	2.01157	0.00343066		Timp3	21859	2.29928	6.57738e-07
Mmp2	17390	2.42698	6.06258e-07		Cysltr1	58861	2.00367	2.34296e-07		Fermt2	218952	2.28704	0.000124481
2610203C20Rik	100042464	2.41614	1.57772e-05		Lhfp	108927	2.0028	3.6536e-05		Ifitm1	68713	2.27871	9.83131e-06
Cysltr1	58861	2.41579	3.00182e-09		Cdh11	12552	2.00113	0.000106734		Meis2	17536	2.2764	0.00300355
Ramp2	54409	2.41524	3.26156e-09		Tns1	21961	1.9992	0.00456808		Angptl2	26360	2.27337	4.80316e-07
Tgfb1i1	21804	2.41502	1.7483e-05		Wfdc1	67866	1.99709	2.9171e-05		F2r	14062	2.26941	3.39632e-08
Plxdc2	67448	2.39975	2.05468e-08		Tek	21687	1.99469	4.66853e-07		Pecam1	18613	2.2594	8.76184e-09
Ggt5	23887	2.3987	1.14226e-07		Lyve1	114332	1.99369	0.00021364		Ptgs2	19225	2.25444	3.39871e-06
Rcn3	52377	2.398	1.02756e-06		Sdpr	20324	1.98249	0.000364568		Fam26e	103511	2.25378	3.95795e-05
Cdh11	12552	2.39609	3.04775e-06		Cp	12870	1.97697	7.56695e-05		Pcsk6	18553	2.2525	8.40761e-06
Col6a1	12833	2.39057	4.38195e-08		Ehd2	259300	1.97322	5.89902e-05		Gucy1b3	54195	2.25235	3.45734e-05
LOC102638670	102638670	2.38207	0.000329346		LOC102638670	102638670	1.96627	0.00502469		Esam	69524	2.25204	4.40592e-08
Ar	11835	2.3727	1.00795e-07		Vcam1	22329	1.96558	8.07717e-07		C4b	12268	2.24432	1.67544e-09
Dmd	13405	2.37105	1.07907e-06		Ptrf	19285	1.96434	0.000163646		Htra1	56213	2.2324	2.73865e-07
C1qb	12260	2.35702	2.02133e-07		Ar	11835	1.96141	6.66459e-06		Tmem119	231633	2.23152	1.36447e-06
C1qc	12262	2.3502	4.95252e-07		Ramp2	54409	1.95948	3.98439e-07		Ltbp1	268977	2.22642	8.76184e-09
Ccdc80	67896	2.34984	0.00034682		Msn	17698	1.95887	0.000133537		Slfn5	327978	2.22057	1.85477e-07
Egfl7	353156	2.34185	1.53486e-09		Osr1	23967	1.9531	0.00123652		Tns1	21961	2.21959	0.00111345
Tie1	21846	2.34012	1.22908e-09		Plekhh2	213556	1.95284	8.22025e-07		Ramp2	54409	2.21702	2.34049e-08
Mamdc2	71738	2.32722	2.17938e-07		Htra1	56213	1.95175	5.17052e-06		Vcam1	22329	2.21523	5.01303e-08
Msrb3	320183	2.32671	5.06699e-06		Qk	19317	1.95172	2.67481e-06		Sdpr	20324	2.21303	5.3846e-05
C3ar1	12267	2.3226	1.39676e-06		Ecm1	13601	1.94632	2.03431e-05		Tspan4	64540	2.21093	1.83807e-07
Ltbp1	268977	2.32247	2.91429e-09		Egfl7	353156	1.94556	1.41561e-07		Calcrl	54598	2.21063	4.04266e-09
Col6a3	12835	2.32103	4.16411e-08		Tie1	21846	1.94425	1.0907e-07		Col6a3	12835	2.19158	1.67395e-07
Qk	19317	2.31989	4.88416e-08		Adamts1	11504	1.94254	2.61573e-05		Ecm2	407800	2.17308	0.000114494
Tmem119	231633	2.31531	5.27524e-07		Lrrc8c	100604	1.94244	5.71182e-07		Qk	19317	2.16487	2.45295e-07
Cxcl13	55985	2.31338	9.15784e-05		Col12a1	12816	1.94203	0.000100223		Hgf	15234	2.16088	0.00111158
Angptl2	26360	2.31266	2.79232e-07		Calcrl	54598	1.93986	8.82933e-08		Msrb3	320183	2.15793	2.46644e-05
Ms4a4a	666907	2.31207	1.23679e-05		Kctd12b	207474	1.939	2.9408e-07		Rbpms	19663	2.15659	0.00019979
Ppap2b	67916	2.30529	1.30487e-09		Mr1	15064	1.93168	1.20255e-05		Itga9	104099	2.15401	1.36421e-06
Tnxb	81877	2.30307	3.11633e-06		Susd2	71733	1.93028	6.08662e-05		Lamb1	16777	2.14745	6.88076e-09
Gucy1b3	54195	2.3007	1.88808e-05		Zcchc24	71918	1.92845	6.44014e-06		Cdh19	227485	2.14419	0.000557483
Snora73b	100306945	2.29848	3.03171e-06		Mmp2	17390	1.92834	6.84773e-05		Cxcl13	55985	2.13919	0.000373132
F2r	14062	2.29588	2.03777e-08		Tmem119	231633	1.92779	2.9171e-05		Kctd12b	207474	2.13646	2.74779e-08
Itga9	104099	2.29527	2.97138e-07		Matn2	17181	1.9137	8.38094e-07		Ecm1	13601	2.13611	2.67404e-06
P2ry14	140795	2.29349	6.45507e-07		Rcn3	52377	1.90513	0.000111038		Tgfb1i1	21804	2.13173	0.000159833
Heg1	77446	2.29284	1.02618e-08		Fbln5	23876	1.9051	6.71622e-07		Col6a2	12834	2.13065	2.27158e-07
Atp2b4	381290	2.29231	0.00459068		Vim	22352	1.89536	7.6976e-07		Vim	22352	2.1306	4.59936e-08
Apoe	11816	2.29115	4.10635e-09		Ctgf	14219	1.89017	0.00112466		Lims2	225341	2.12776	0.000623382
Zcchc24	71918	2.28608	1.23446e-07		Angptl2	26360	1.88956	2.59274e-05		Ptrf	19285	2.12488	3.71163e-05
Hgf	15234	2.2812	0.000454101		Dse	212898	1.88657	5.20644e-07		Wfdc1	67866	2.12362	7.98314e-06
Col14a1	12818	2.2805	1.52329e-07		Il7r	16197	1.88147	3.80205e-05		Ccdc80	67896	2.12071	0.00155137
Mr1	15064	2.2706	2.87507e-07		Dmd	13405	1.87887	0.000128917		Egfl7	353156	2.1118	1.61735e-08
Susd2	71733	2.26846	1.8981e-06		Ms4a7	109225	1.87668	2.08761e-06		Ms4a6c	73656	2.11147	1.90293e-05
Cp	12870	2.26403	4.23333e-06		Hmcn2	665700	1.87542	3.9093e-05		Gabra3	14396	2.1079	1.97287e-06
Vcam1	22329	2.25747	2.73335e-08		Ppap2b	67916	1.87201	2.2199e-07		Mpeg1	17476	2.10629	8.6629e-07
Mpeg1	17476	2.24411	1.84391e-07		Lilrb4	14728	1.86939	6.47366e-06		Csf1r	12978	2.10621	4.38518e-08
Vcan	13003	2.23983	6.00944e-06		Tnxb	81877	1.86507	0.00023129		C1qa	12259	2.10601	9.36548e-08
Vsig2	57276	2.23799	6.04958e-10		Msrb3	320183	1.86443	0.000393157		Tshz3	243931	2.10502	9.75841e-08
Zeb1	21417	2.23705	1.49116e-06		C1qa	12259	1.86295	1.81152e-06		Cp	12870	2.1038	2.16413e-05
Htra1	56213	2.23115	2.12906e-07		Eml1	68519	1.86171	4.70113e-07		Crispld2	78892	2.10119	7.32775e-07
Ighm	16019	2.23097	0.00259677		Ptprm	19274	1.8597	3.13189e-07		Heg1	77446	2.10116	7.99294e-08
Dab2	13132	2.22982	6.02426e-07		Glp2r	93896	1.85968	7.60028e-06		Lphn3	319387	2.09548	2.75848e-06
Prkcdbp	109042	2.2293	4.15172e-06		Dysf	26903	1.85937	5.48049e-08		Hmcn2	665700	2.09231	3.48779e-06
Pid1	98496	2.2184	1.37699e-07		Zeb1	21417	1.85875	8.53747e-05		Tie1	21846	2.09185	1.57956e-08
Fbln5	23876	2.20852	1.58819e-08		Tspan4	64540	1.85471	9.60679e-06		Mzb1	69816	2.09144	0.00259747
Emr1	13733	2.19937	1.00795e-07		Plxnd1	67784	1.85417	2.68395e-07		Plxdc2	67448	2.08342	4.16381e-07
Tmtc1	387314	2.19655	3.30974e-06		Mmrn2	105450	1.84615	2.68054e-05		Sema3a	20346	2.08298	0.000316565
Rbpms	19663	2.19293	0.000124564		Fbln2	14115	1.83752	1.01416e-06		Ms4a6d	68774	2.08027	0.000199782
Vim	22352	2.19256	1.93051e-08		Col14a1	12818	1.82689	2.59274e-05		Col1a2	12843	2.07335	5.90897e-08
Tm4sf1	17112	2.19182	1.64123e-07		Pid1	98496	1.82637	1.48804e-05		Adam19	11492	2.07175	1.09181e-07
Eml1	68519	2.19004	6.69031e-09		Ebf1	13591	1.82357	0.00123036		Ear2	13587	2.06968	0.00342122
Plekhh2	213556	2.1822	4.73629e-08		Cd209a	170786	1.8216	0.000611441		Ifitm3	66141	2.06899	4.5359e-06
Calcrl	54598	2.18183	3.46517e-09		Csf1r	12978	1.81642	1.63632e-06		Msn	17698	2.06864	4.61158e-05
Sema3a	20346	2.17851	0.000126468		Ifitm1	68713	1.81525	0.000660951		Ctgf	14219	2.06811	0.000252335
Matn2	17181	2.16841	3.48233e-08		Tm6sf1	107769	1.81178	4.18474e-05		Zcchc24	71918	2.06608	1.313e-06
Plxnd1	67784	2.15757	4.41805e-09		Tgfb1i1	21804	1.80869	0.00234209		Mr1	15064	2.06591	2.53455e-06
Fndc1	68655	2.15583	7.20647e-07		Pf4	56744	1.80801	1.60129e-05		Mgp	17313	2.06589	0.00117881
Clec9a	232414	2.14831	1.71889e-05		Tlr13	279572	1.80631	1.24834e-05		Cd36	12491	2.06154	0.000645706
Msn	17698	2.14692	1.81861e-05		Prkcdbp	109042	1.80539	0.000341706		Cdh13	12554	2.06078	5.66543e-06
Mcam	84004	2.14622	9.66925e-05		Ly86	17084	1.80461	0.000802184		Igfbp4	16010	2.06078	8.47588e-06
Col1a2	12843	2.13715	2.42708e-08		Ecm2	407800	1.80416	0.00241143		Emp3	13732	2.05899	0.000198917
Hsd11b1	15483	2.13412	1.71601e-06		Spon1	233744	1.80103	0.000138247		Srpx2	68792	2.05898	3.47556e-07
Lamb1	16777	2.13225	5.10408e-09		Lims2	225341	1.80096	0.00690401		Ppap2b	67916	2.05749	1.81336e-08
Reck	53614	2.1306	9.29577e-07		Pcdhb17	93888	1.80078	2.68727e-06		Olfml2b	320078	2.05569	5.86693e-05
Olfr1372-ps1	257871	2.12921	0.000151084		Heg1	77446	1.79767	3.50559e-06		Glipr1	73690	2.04755	0.00113287
Akap12	83397	2.12684	1.28783e-06		Podn	242608	1.79542	0.000156738		Dse	212898	2.04657	6.05085e-08
Podn	242608	2.12654	3.45522e-06		Serpinh1	12406	1.79541	4.76341e-05		Tnfrsf17	21935	2.04636	0.000177162
Dlc1	50768	2.11626	1.04797e-08		Vcan	13003	1.79055	0.000552378		Plod2	26432	2.04502	3.53287e-07
Crispld2	78892	2.11612	4.98758e-07		Hpse2	545291	1.786	0.000116491		Arhgap10	78514	2.04431	3.57763e-07
Galnt15	78754	2.11315	4.58158e-09		Ms4a6b	69774	1.78062	2.67805e-05		Susd2	71733	2.04188	1.87783e-05
Kcnj8	16523	2.11138	1.89664e-06		9430020K01Rik	240185	1.77807	8.5282e-08		Adamts1	11504	2.04149	8.40761e-06
Fgfr1	14182	2.10557	1.49445e-07		A530099J19Rik	319293	1.77693	0.000596442		Plekhh2	213556	2.0392	2.55042e-07
Ebf1	13591	2.10386	8.37508e-05		Col6a3	12835	1.77693	2.18249e-05		Lamc1	226519	2.03839	3.30279e-08
F13a1	74145	2.10354	1.93609e-07		Mgp	17313	1.77663	0.00981322		Zeb1	21417	2.03677	1.17625e-05
Ptprm	19274	2.1031	1.04797e-08		Pdpn	14726	1.77251	0.000149022		Tlr13	279572	2.03392	6.74252e-07
Mir143	387161	2.10252	9.5763e-05		Lamb1	16777	1.76915	7.82933e-07		Ms4a7	109225	2.03116	2.80906e-07
Dtna	13527	2.0985	9.85846e-05		Crispld2	78892	1.76898	4.05754e-05		Fbln5	23876	2.03067	1.23307e-07
Plod2	26432	2.09437	1.68238e-07		Rbpms	19663	1.76814	0.00464328		Olfr1372-ps1	257871	2.02921	0.000409319
Scube1	64706	2.09187	2.5689e-08		Ms4a6d	68774	1.76696	0.00300573		Ms4a6b	69774	2.02402	1.2627e-06
Tspan4	64540	2.08596	4.9274e-07		9330159F19Rik	212448	1.76633	0.00112551		Mmrn2	105450	2.02222	3.23861e-06
Art3	109979	2.08465	0.000137124		Slc11a1	18173	1.76507	8.22025e-07		Ly86	17084	2.02202	9.97874e-05
Pdpn	14726	2.08423	3.45786e-06		Itga9	104099	1.76341	0.000112852		Tnxb	81877	2.02095	4.66281e-05
Kctd12b	207474	2.07289	3.77193e-08		Galnt15	78754	1.76196	6.71622e-07		Ptgs1	19224	2.01891	3.92256e-06
Hmcn2	665700	2.07122	3.51305e-06		Cybb	13058	1.76098	0.00126855		Cysltr1	58861	2.01665	1.46901e-07
Cpxm2	55987	2.06928	1.93609e-07		Fndc1	68655	1.76051	8.55275e-05		Cryab	12955	2.01564	0.00356751
Col3a1	12825	2.0689	5.38443e-06		5430435G22Rik	226421	1.76011	1.46631e-05		Srgn	19073	2.01335	2.44296e-05
Adamts1	11504	2.06868	5.22527e-06		Mcam	84004	1.75994	0.00320576		Ggta1	14594	2.01281	1.86916e-06
Ms4a6c	73656	2.06079	2.38535e-05		Col6a2	12834	1.75762	2.22961e-05		Scube1	64706	2.01039	8.04269e-08
Osr1	23967	2.05911	0.000442318		Lix1l	280411	1.75257	0.000443922		Plxnd1	67784	2.01001	3.0091e-08
Serpinh1	12406	2.05803	1.67251e-06		Pcsk6	18553	1.75103	0.000965519		Pxdn	69675	2.00624	1.89904e-06
Lphn3	319387	2.05471	3.32772e-06		Ms4a14	383435	1.74635	0.00146604		C1qtnf3	81799	2.0036	0.000644306
Fcgr2b	14130	2.04771	2.33845e-05		Adam19	11492	1.74585	7.4664e-06		Tmtc1	387314	2.00337	2.55605e-05
Lamc1	226519	2.04706	2.2122e-08		Kcnj8	16523	1.74491	0.000158357		Clec9a	232414	1.99749	8.20946e-05
Ifitm1	68713	2.04696	5.60728e-05		Plod2	26432	1.74347	1.89893e-05		Prkcdbp	109042	1.99193	4.70379e-05
Gnb4	14696	2.04521	2.79612e-07		Sema3a	20346	1.74163	0.00543438		Fat4	329628	1.99013	9.57144e-06
Lyve1	114332	2.04311	0.000102977		Anxa6	11749	1.74048	2.68054e-05		Robo4	74144	1.98762	4.07297e-07
Pxdn	69675	2.03884	1.07907e-06		Scube1	64706	1.73622	3.5224e-06		Mcam	84004	1.98645	0.000430728
Robo4	74144	2.035	1.91713e-07		Cdh13	12554	1.7356	0.000246934		Glp2r	93896	1.98394	1.60086e-06
Ptgs1	19224	2.02552	3.03171e-06		Col1a2	12843	1.73485	5.12052e-06		Pf4	56744	1.97802	1.75707e-06
Adam19	11492	2.0246	1.37699e-07		Itgb3	16416	1.73402	0.000423747		Lix1l	280411	1.97788	3.65963e-05
Clec3b	21922	2.02398	9.71485e-06		Folr2	14276	1.73388	0.000239296		Lyz2	17105	1.97486	0.000154498
Mrvi1	17540	2.02212	0.000455019		Lphn3	319387	1.73293	0.00018543		Ccdc3	74186	1.97214	2.93259e-06
Tshz3	243931	2.01886	1.84391e-07		Akap12	83397	1.72824	0.000161896		A530099J19Rik	319293	1.97114	7.73586e-05
Olfml2b	320078	2.01874	6.3632e-05		Robo4	74144	1.72586	1.57427e-05		Cybb	13058	1.96964	0.000164605
Procr	19124	2.01857	3.7851e-08		Fxyd5	18301	1.72434	7.2718e-05		Akap12	83397	1.96408	8.40761e-06
Pcdhb17	93888	2.01845	1.13872e-07		Dlc1	50768	1.72418	2.46617e-06		Anxa6	11749	1.96159	1.36421e-06
Ggta1	14594	2.0139	1.52009e-06		Lamc1	226519	1.72376	2.46617e-06		Gnb4	14696	1.96021	9.5822e-07
Cryab	12955	2.00817	0.00344553		Olfr1372-ps1	257871	1.72177	0.00566797		Slc11a1	18173	1.95871	4.83461e-08
Fat4	329628	2.00553	6.67729e-06		Fgfr1	14182	1.71895	2.68054e-05		Fxyd5	18301	1.95825	3.27443e-06
Dysf	26903	1.99676	4.26968e-09		Srgn	19073	1.71527	0.000652053		Pcolce	18542	1.95479	1.56334e-06
Meis1	17268	1.99664	4.85184e-05		Cxcl14	57266	1.71403	4.37319e-06		Mmp19	58223	1.95311	8.06936e-07
Mmrn2	105450	1.99599	3.49861e-06		Cd163	93671	1.71402	1.52899e-05		Tm6sf1	107769	1.95273	7.04401e-06
Csf1r	12978	1.99395	1.07587e-07		Emp3	13732	1.71134	0.00449228		Cpxm2	55987	1.95125	9.79708e-07
Cml5	69049	1.99314	0.0051364		Srpx2	68792	1.71027	3.34675e-05		LOC102638670	102638670	1.95093	0.0046597
Hlf	217082	1.9921	4.2082e-05		Ifitm3	66141	1.71016	0.000306563		Fgfr1	14182	1.94875	1.12638e-06
Itgb3	16416	1.99107	1.81483e-05		Tmtc1	387314	1.70926	0.000668799		Ptprm	19274	1.94582	8.24673e-08
Lix1l	280411	1.98947	2.58453e-05		Pxdn	69675	1.70748	9.11585e-05		Gpm6b	14758	1.94451	2.9279e-05
Col6a2	12834	1.984	8.85039e-07		Reck	53614	1.70631	0.000174199		Ifi205	226695	1.94396	0.0053347
Ecm2	407800	1.98283	0.000412693		Rgl1	19731	1.70565	6.08662e-05		Rgl1	19731	1.94243	2.40319e-06
Pcdhb21	93892	1.9819	2.84067e-08		Tshz3	243931	1.7043	1.80147e-05		Dysf	26903	1.93756	1.28334e-08
Tenm3	23965	1.98026	3.91952e-08		Tgm2	21817	1.70316	6.03834e-05		Ebf1	13591	1.92975	0.000460651
Rgl1	19731	1.97997	1.26857e-06		Tenm3	23965	1.70134	3.03541e-06		Tgm2	21817	1.92384	2.86489e-06
Htra3	78558	1.97506	1.28509e-05		Pla2g7	27226	1.69995	1.89434e-05		Ms4a14	383435	1.92271	0.000252335
Dse	212898	1.97477	1.06362e-07		Cd33	12489	1.69855	0.000465231		F13a1	74145	1.92039	1.97291e-06
Fabp4	11770	1.97474	0.00726106		Lyz2	17105	1.6938	0.0025499		Dmd	13405	1.91871	7.96753e-05
Tubb6	67951	1.97031	0.000220015		Ggta1	14594	1.68758	0.000126238		Tenm3	23965	1.91207	1.20959e-07
Cdh13	12554	1.97017	1.22255e-05		Enpp3	209558	1.68716	5.97663e-05		Kcnj8	16523	1.91135	2.01235e-05
Spon1	233744	1.96617	1.65142e-05		Htra3	78558	1.68698	0.000492337		Pla2g7	27226	1.9105	8.48861e-07
Akt3	23797	1.96571	1.17916e-05		Fcrls	80891	1.68697	6.62143e-05		Rgs10	67865	1.90847	1.97291e-06
Ms4a6b	69774	1.96047	2.03666e-06		Olfml2b	320078	1.68695	0.00225066		Itgb3	16416	1.90391	5.78551e-05
Ptgs2	19225	1.95871	4.34886e-05		Pde1a	18573	1.68462	7.04368e-06		Gem	14579	1.90201	0.000227708
Cep85l	100038725	1.95685	1.07907e-06		Stc1	20855	1.68173	0.00098092		Reck	53614	1.90023	1.38037e-05
Pde1a	18573	1.94946	1.07414e-07		Fcgr3	14131	1.68108	0.00117216		Adcy4	104110	1.89793	2.33281e-07
Tlr13	279572	1.94866	1.50273e-06		Milr1	380732	1.68077	0.000264446		Fbln2	14115	1.89628	3.91274e-07
9430020K01Rik	240185	1.94763	4.09891e-09		Art3	109979	1.68024	0.00618641		4632428N05Rik	74048	1.89581	1.85477e-07
4632428N05Rik	74048	1.94627	7.87866e-08		Pcdhb21	93892	1.67214	3.61813e-06		Ly6c1	17067	1.89167	0.0030864
Chsy3	78923	1.9367	2.77191e-06		Abca9	217262	1.66861	0.000143627		Gucy1a2	234889	1.8915	3.47556e-07
S1pr1	13609	1.93539	2.87166e-05		Lsp1	16985	1.66587	8.44695e-05		Pid1	98496	1.89132	5.79087e-06
Lmod1	93689	1.93446	0.000470146		Cpxm2	55987	1.66507	5.72977e-05		Ar	11835	1.89	1.4341e-05
Ms4a14	383435	1.93212	0.000186907		Pcolce	18542	1.66358	8.87739e-05		Mab21l2	23937	1.88935	0.000548422
Il7r	16197	1.92138	1.81935e-05		Kcnip3	56461	1.66328	5.53776e-05		Matn2	17181	1.88393	1.09026e-06
Lrrc17	74511	1.92115	1.15571e-05		Pla2g2d	18782	1.66305	0.00014232		9430020K01Rik	240185	1.87636	1.47642e-08
9330159F19Rik	212448	1.92058	0.000193462		4632428N05Rik	74048	1.66079	7.3903e-06		Col3a1	12825	1.86836	5.82229e-05
Pcolce	18542	1.91961	1.8981e-06		Ntn1	18208	1.66053	0.000306563		Trdv4	100114901	1.86823	0.00545197
C1ra	50909	1.91926	0.000641407		Kcnn3	140493	1.65641	0.00104197		Dlc1	50768	1.86792	2.45295e-07
Mab21l2	23937	1.91754	0.000343523		Gpm6b	14758	1.65548	0.000878676		S1pr1	13609	1.86633	7.56587e-05
Tgm2	21817	1.91734	2.49153e-06		S1pr1	13609	1.65227	0.000979596		Klrb1b	80782	1.86506	0.000291157
Pcsk6	18553	1.91629	0.000138021		Rgs10	67865	1.65108	8.44695e-05		Ntn1	18208	1.86442	2.01999e-05
5430435G22Rik	226421	1.91252	1.38761e-06		Meis1	17268	1.65074	0.00233734		Dennd5a	19347	1.85824	6.96773e-06
Enpp3	209558	1.90956	2.03926e-06		Gnb4	14696	1.65037	7.73124e-05		Akt3	23797	1.85444	5.11711e-05
Ntn1	18208	1.90497	9.9638e-06		Ccdc3	74186	1.64751	0.000226347		Pdpn	14726	1.85326	5.3846e-05
Anxa6	11749	1.90302	2.20827e-06		Ptgs1	19224	1.64547	0.000438324		P2ry13	74191	1.85	5.11042e-06
Tmem255b	272465	1.89906	2.11456e-06		Hlf	217082	1.64462	0.00218625		5430435G22Rik	226421	1.84589	3.91312e-06
Gpm6b	14758	1.89672	4.00609e-05		Akt3	23797	1.64194	0.00072856		Procr	19124	1.8405	4.52987e-07
Trps1	83925	1.89128	0.00017047		Tgfb2	21808	1.64056	0.000840852		Snai2	20583	1.8392	1.636e-06
Csrp1	13007	1.89055	0.00509052		Clip4	78785	1.63894	0.0010038		Arap3	106952	1.8366	1.28334e-08
Svil	225115	1.88999	0.000555824		Arhgap10	78514	1.63453	0.000100543		Tubb6	67951	1.83625	0.000898491
Adcy4	104110	1.88518	2.12906e-07		Tubb6	67951	1.63346	0.00690192		Kcnn3	140493	1.83553	0.000120702
Dennd5a	19347	1.8827	4.12715e-06		Fmo1	14261	1.63128	0.0032435		Ntf3	18205	1.83473	4.13211e-06
Fcgr3	14131	1.8822	9.7475e-05		Fat4	329628	1.62984	0.000784571		Gja1	14609	1.83419	0.000149416
Arap3	106952	1.87913	4.58158e-09		Mxra7	67622	1.6281	0.000494164		Fcgr3	14131	1.83114	0.000207789
Prkg1	19091	1.87827	7.07324e-05		Tyrobp	22177	1.62249	0.000262889		Tyrobp	22177	1.82921	1.30257e-05
Cd163	93671	1.87672	1.07907e-06		Sema7a	20361	1.6204	0.000116056		Cd209a	170786	1.82456	0.00055482
Mfap5	50530	1.87453	2.08129e-05		Lrrc17	74511	1.61674	0.000700527		Ccl8	20307	1.82245	0.000487057
Ifitm3	66141	1.87374	3.18213e-05		Arap3	106952	1.61217	6.71622e-07		Derl3	70377	1.82068	0.000509505
Emp3	13732	1.86925	0.000818025		Adcy4	104110	1.61046	2.37854e-05		Lsp1	16985	1.81748	8.40761e-06
Acer2	230379	1.86802	4.09891e-09		Ppic	19038	1.60858	4.88621e-05		Colec12	140792	1.81365	0.00067811
Col15a1	12819	1.86736	9.72691e-08		Cldn1	12737	1.60752	0.00670299		Pde1a	18573	1.81256	8.7402e-07
Fmo1	14261	1.86358	0.000204804		Catsperd	106757	1.60631	0.000247734		Fkbp10	14230	1.81209	4.79278e-05
Cap2	67252	1.86166	0.000880732		Jam3	83964	1.60492	0.000485467		Cd33	12489	1.81177	0.000109299
Ppic	19038	1.85879	7.00458e-07		Procr	19124	1.60137	2.59274e-05		Cytl1	231162	1.81142	3.36579e-06
Grb10	14783	1.85741	8.02942e-07		Clec3b	21922	1.59987	0.00170721		Tgfb2	21808	1.81081	9.9166e-05
Prickle2	243548	1.85663	1.1832e-07		Plau	18792	1.59837	0.00952095		Thbd	21824	1.80011	1.30983e-06
Vwf	22371	1.85513	4.95252e-07		P2ry13	74191	1.59556	0.000239897		St8sia6	241230	1.79891	1.7465e-05
Cxcl14	57266	1.85402	3.78256e-07		Mfap5	50530	1.59323	0.00101477		Cd209f	69142	1.78978	0.000442017
Parp8	52552	1.85375	6.27331e-05		Ntf3	18205	1.59153	0.000183715		Galnt15	78754	1.78905	3.47556e-07
Mmp19	58223	1.85166	2.3696e-06		Prkg1	19091	1.59137	0.00267892		Jam3	83964	1.78896	3.48415e-05
Ndn	17984	1.85043	0.00242543		Col15a1	12819	1.59087	1.35271e-05		Nrg1	211323	1.78582	0.000377928
Tm6sf1	107769	1.84881	1.97951e-05		Dennd5a	19347	1.58946	0.000364568		Cd53	12508	1.78508	0.00964891
Rnf144b	218215	1.84466	0.00126398		Tmem255b	272465	1.58456	0.000274446		Hpse2	545291	1.78197	0.000113374
C1qa	12259	1.84342	1.66371e-06		Filip1	70598	1.58301	0.000674119		Rspo3	72780	1.77893	0.00141006
Cybb	13058	1.84059	0.000458071		St8sia6	241230	1.58265	0.000437926		9330159F19Rik	212448	1.77827	0.000936775
Filip1	70598	1.8403	1.51916e-05		Gpr124	78560	1.58229	3.54018e-05		Ehd3	57440	1.77731	1.39948e-05
Tgfb2	21808	1.83985	5.60728e-05		1700018A04Rik	71307	1.58178	0.00991335		Pdgfrb	18596	1.77586	1.02497e-07
Medag	70717	1.83694	0.000136381		Tspan18	241556	1.57979	0.000784571		Hlf	217082	1.77316	0.000493881
Arhgef17	207212	1.83637	1.07414e-07		Trps1	83925	1.57843	0.00639368		Pcdh9	211712	1.77249	3.1793e-06
Srpx2	68792	1.83629	4.12715e-06		Igf2	16002	1.57805	3.77049e-06		Loxl2	94352	1.76658	0.000114294
Gpr124	78560	1.83607	3.78256e-07		Pcdh9	211712	1.57631	9.04799e-05		Htra3	78558	1.76527	0.000170946
Slc11a1	18173	1.83604	1.87266e-07		She	214547	1.5744	7.36911e-06		Art3	109979	1.76429	0.00249805
Chl1	12661	1.8356	0.00568417		Pdgfrb	18596	1.57158	4.68609e-06		Plau	18792	1.75463	0.00184926
Fbn1	14118	1.8351	1.56908e-06		Ehd3	57440	1.57073	0.000357902		C5ar1	12273	1.7499	4.15959e-05
Cnrip1	380686	1.83405	0.000172891		Thy1	21838	1.5696	0.000302235		Rem1	19700	1.74723	5.49855e-05
Gucy1a2	234889	1.83394	6.25885e-07		Casp12	12364	1.56953	0.00663211		Abca9	217262	1.74029	4.91872e-05
A530099J19Rik	319293	1.83278	0.000249719		Cnrip1	380686	1.56792	0.00484403		Rasgrp3	240168	1.73274	0.00658537
Col4a2	12827	1.83236	1.07414e-07		Hip1	215114	1.56632	0.00040733		Clip4	78785	1.73173	0.000301385
Mxra7	67622	1.83033	2.52238e-05		Colec12	140792	1.56524	0.00947341		Milr1	380732	1.72748	0.000129881
Fscn1	14086	1.83019	5.98538e-06		Stard9	668880	1.56423	1.73154e-05		Lilrb4	14728	1.72707	4.33435e-05
Pla2g7	27226	1.82908	2.0154e-06		Col3a1	12825	1.56238	0.00261882		Tmem255b	272465	1.72606	2.8709e-05
Arhgef25	52666	1.82725	2.01398e-05		Ptgs2	19225	1.55997	0.00500524		Il7r	16197	1.72501	0.000235869
Mtss1l	244654	1.82543	9.7475e-05		Prickle2	243548	1.5588	2.6941e-05		Foxf2	14238	1.72124	3.60307e-05
Rspo3	72780	1.82527	0.000782334		Mmp19	58223	1.55834	0.000287596		Wwtr1	97064	1.72107	0.000936775
Cd33	12489	1.82445	7.4345e-05		Gpr182	11536	1.55627	0.000262889		Dock10	210293	1.72067	0.00126297
Ly6c1	17067	1.82299	0.00468215		Arhgef25	52666	1.55383	0.00114248		Grb10	14783	1.71483	8.2589e-06
Ifi203	15950	1.82076	0.00184579		Sirpa	19261	1.55338	5.54665e-05		Ptger1	19216	1.71447	3.48624e-06
Sgcd	24052	1.81959	0.00059487		Rbp7	63954	1.55167	0.00109057		Lox	16948	1.71292	0.000430912
Pcdhb19	93890	1.81787	1.74432e-06		Pla2g12b	69836	1.54829	0.00558928		Fcer1g	14127	1.71193	0.000747594
Plau	18792	1.81776	0.000880588		Msr1	20288	1.54827	0.00999413		Spon1	233744	1.7103	0.000384643
Lsp1	16985	1.81753	7.00447e-06		Csf1	12977	1.54725	0.000211238		Tbxas1	21391	1.70924	2.25766e-05
Kcnn3	140493	1.81576	0.000121681		Cd86	12524	1.54711	0.00839267		Prkg1	19091	1.70854	0.00060854
Folr2	14276	1.81232	6.67291e-05		Dkk3	50781	1.54244	3.14347e-05		Trpa1	277328	1.70719	0.00357994
Ckb	12709	1.81066	0.00941806		Alpl	11647	1.54134	0.000220936		Mtss1l	244654	1.70233	0.000519853
Fxyd5	18301	1.81028	1.71325e-05		Zfp521	225207	1.54103	0.000309121		Bmp7	12162	1.70116	8.43798e-05
Lyz2	17105	1.80961	0.000614915		Snora73b	100306945	1.5407	0.00785366		Dtna	13527	1.69883	0.0037875
Dkk3	50781	1.8096	1.91713e-07		Vwf	22371	1.54041	0.000121286		Dkk3	50781	1.69575	1.57255e-06
Casp12	12364	1.8074	0.00037296		Loxl2	94352	1.53959	0.00246143		Medag	70717	1.69528	0.000832761
Tspan18	241556	1.80625	2.68643e-05		Tbxas1	21391	1.53875	0.000393157		Gli3	14634	1.69456	0.000106617
Arhgap10	78514	1.80281	6.00944e-06		Tlr7	170743	1.53792	0.000840287		Sirpa	19261	1.69304	3.81811e-06
Atp1a2	98660	1.7999	1.90591e-06		Dnm3os	474332	1.53777	9.96335e-05		Mrvi1	17540	1.6924	0.00727898
Fkbp10	14230	1.79932	4.45794e-05		Sox18	20672	1.53566	0.00115575		Sema3f	20350	1.6908	4.68204e-08
Thbs2	21826	1.79902	0.000822711		Il33	77125	1.53485	0.00380066		Chsy3	78923	1.69	9.14326e-05
Stard9	668880	1.79703	1.91713e-07		Arhgef17	207212	1.53259	3.25384e-05		Parp8	52552	1.68993	0.000548586
Pdgfrb	18596	1.78919	6.40614e-08		Medag	70717	1.53224	0.00649452		Fcrls	80891	1.6892	6.01585e-05
Pcdh9	211712	1.78875	2.0154e-06		Cep85l	100038725	1.52783	0.00068839		Meis1	17268	1.68837	0.00139532
Itga5	16402	1.78735	0.00751083		Chsy3	78923	1.52757	0.0011059		Mef2c	17260	1.68335	0.00167545
Lilrb4	14728	1.78613	1.51916e-05		Atp1b2	11932	1.52726	0.00277196		Olfml3	99543	1.68242	0.000335606
Snora73a	100306944	1.78485	2.27142e-05		Fbn1	14118	1.52606	0.000306563		Dnase1l3	13421	1.68169	0.00309497
Sfrp2	20319	1.78441	0.00136083		Bicc1	83675	1.52578	2.63345e-05		4930578C19Rik	75905	1.68167	0.000164605
Dnm3	103967	1.78338	5.89812e-07		Tbx2	21385	1.52501	0.000572268		Eml1	68519	1.67875	6.14517e-06
Thbd	21824	1.78008	1.42478e-06		Cd84	12523	1.52392	0.0065241		Pde7b	29863	1.6782	1.27846e-05
Ms4a6d	68774	1.77748	0.00216241		C5ar1	12273	1.52328	0.00121358		Clec3b	21922	1.67671	0.000611939
Hspa2	15512	1.77531	3.29501e-05		Parp8	52552	1.52304	0.00498972		Plekho1	67220	1.67587	8.41016e-05
Creb3l3	208677	1.77403	0.00594265		Mtss1l	244654	1.5221	0.00542291		Cnrip1	380686	1.67268	0.00125191
Dzip1	66573	1.77171	4.97927e-07		Foxf2	14238	1.52196	0.000822562		Fli1	14247	1.6726	0.00139753
Colec12	140792	1.77036	0.000871012		Sdc3	20970	1.5219	0.00144896		Arhgef17	207212	1.67245	1.9376e-06
Slit3	20564	1.7672	0.000178718		Rem1	19700	1.52064	0.0015181		Acvrl1	11482	1.67174	3.37486e-08
Plekho1	67220	1.76501	1.84139e-05		Gucy1a2	234889	1.52038	0.000170673		Serpina3g	20715	1.67144	0.000391391
Ccdc3	74186	1.76398	3.29638e-05		Acer2	230379	1.51997	3.4075e-06		Filip1	70598	1.67136	0.000176651
Mef2c	17260	1.75713	0.00065195		Clec4n	56620	1.51659	0.00639368		H2-Aa	14960	1.66968	0.00195973
Rem1	19700	1.75615	3.88754e-05		Aoah	27052	1.5149	0.00022812		Stc1	20855	1.66953	0.00107258
Olfml3	99543	1.75474	0.000106992		Cacng7	81904	1.51339	0.000800684		Fgf2	14173	1.66929	0.002173
Stc1	20855	1.75308	0.000336783		Syne1	64009	1.5127	1.45643e-05		Cyp7b1	13123	1.66609	0.000429475
Apod	11815	1.75287	0.000337286		Atp1a2	98660	1.51115	0.000327109		She	214547	1.66541	1.18807e-06
Sema7a	20361	1.74881	1.21308e-05		Lilra5	232801	1.50962	0.0038016		Mxra7	67622	1.66405	0.000274867
Fgf2	14173	1.74811	0.000803119		Grb10	14783	1.50693	0.000341706		Adamts10	224697	1.66157	6.32325e-07
Tgfb3	21809	1.74633	7.76695e-05		Pros1	19128	1.50637	0.00221322		Trps1	83925	1.66063	0.00226935
Syne1	64009	1.74393	1.06362e-07		Olfml3	99543	1.50434	0.00413524		Lrrc17	74511	1.65915	0.000376091
Pf4	56744	1.74128	3.02498e-05		Vtn	22370	1.49986	9.13992e-05		Prickle2	243548	1.65752	3.71367e-06
Chrdl1	83453	1.73927	0.00804173		Col4a2	12827	1.49964	6.28709e-05		H2afy2	404634	1.65718	0.0051364
Tspan2	70747	1.73825	0.00127135		Adamts10	224697	1.49953	2.16243e-05		Klhl4	237010	1.65557	0.00126297
Foxf2	14238	1.73516	2.32276e-05		Bcl6b	12029	1.49759	0.000611321		Gpr124	78560	1.65547	8.40761e-06
Ank2	109676	1.73395	0.0022658		Slit3	20564	1.49644	0.00716334		Arhgef25	52666	1.65418	0.000255142
Rab34	19376	1.73179	1.27183e-05		Ptges	64292	1.49478	0.00776366		Bicc1	83675	1.654	1.80742e-06
Ly86	17084	1.7285	0.00137149		Ccr2	12772	1.49351	0.00549531		Gpr182	11536	1.65362	4.91872e-05
Jam3	83964	1.72663	6.27331e-05		Ptger1	19216	1.4918	0.000233972		Enpp3	209558	1.6535	9.28882e-05
Plekhb1	27276	1.72622	0.000288916		Nexn	68810	1.4915	0.000822547		Phxr4	18689	1.65308	0.00019257
Bicc1	83675	1.72582	3.9778e-07		Arhgef6	73341	1.49119	0.00246009		Atp1a2	98660	1.65263	2.44296e-05
4930578C19Rik	75905	1.72317	7.38734e-05		Hspa2	15512	1.49091	0.00261216		Mmp13	17386	1.65163	2.56641e-05
Cldn1	12737	1.72309	0.00157786		Pcdhga6	93714	1.49084	0.00171158		Vtn	22370	1.65019	4.13211e-06
Gpr126	215798	1.72227	4.84235e-05		Slc9a9	331004	1.49013	0.000700662		Cep85l	100038725	1.64999	9.26448e-05
Gja1	14609	1.72172	0.000443839		Fscn1	14086	1.48818	0.00141619		Atp1b2	11932	1.64639	0.00050695
Milr1	380732	1.72153	0.000113897		Rab34	19376	1.48814	0.000888155		Cybrd1	73649	1.64309	3.67809e-05
Ntf3	18205	1.7205	1.80111e-05		4930578C19Rik	75905	1.48395	0.00320576		Rab34	19376	1.6418	6.43019e-05
Smtn	29856	1.71707	4.60924e-05		Aldh1a2	19378	1.48316	0.00435282		C1qtnf1	56745	1.64082	0.000278456
Klhl4	237010	1.71616	0.000531462		Ccdc88a	108686	1.48155	0.00182478		Col15a1	12819	1.64046	4.57426e-06
Rasgrp3	240168	1.71211	0.00731582		Vstm4	320736	1.48056	0.00068839		Igsf6	80719	1.64029	6.43019e-05
Abca9	217262	1.71135	5.76651e-05		Papln	170721	1.47982	0.000246934		Ifi203	15950	1.63934	0.00940474
Srgn	19073	1.71033	0.000533929		Scn1b	20266	1.47919	0.000149303		Lmod1	93689	1.63912	0.00730872
Sirpa	19261	1.70862	2.41615e-06		Sncaip	67847	1.47752	0.000462629		Tril	66873	1.63617	0.000139231
Sdc3	20970	1.70629	7.23553e-05		Cyp7b1	13123	1.47606	0.00625243		H2-Eb1	14969	1.63573	0.00245428
Abca8b	27404	1.70169	0.000740588		Aox1	11761	1.47417	0.000244359		Hspg2	15530	1.63467	2.20797e-07
Zfp521	225207	1.69963	1.68293e-05		Dzip1	66573	1.4736	0.000182144		1700018A04Rik	71307	1.6342	0.00497941
Nav1	215690	1.69933	2.5689e-08		Gli1	14632	1.47288	3.0428e-05		Ets1	23871	1.63252	8.53589e-05
Clec1a	243653	1.69516	9.33647e-05		42617	18952	1.47215	0.00184206		4930503L19Rik	269033	1.63246	0.00100722
Ms4a7	109225	1.69509	2.04182e-05		Shank3	58234	1.469	1.90997e-05		Rbp4	19662	1.63152	1.07023e-05
Vtn	22370	1.69425	1.58976e-06		Acvrl1	11482	1.46828	3.47693e-06		Olfr1034	258216	1.63086	0.00348375
Adamts10	224697	1.69397	2.78189e-07		Parp3	235587	1.46775	1.29427e-06		Slc9a3r2	65962	1.63069	3.71367e-06
Pde7b	29863	1.69243	8.16729e-06		C1qtnf1	56745	1.46597	0.00414231		Ccr1	12768	1.62879	0.000409378
Ehd3	57440	1.69185	4.00609e-05		Timp2	21858	1.46459	0.00217468		Timp2	21858	1.62858	0.000142574
Enpp6	320981	1.68557	8.67031e-07		Rab3il1	74760	1.45784	9.2049e-05		Vwa1	246228	1.62852	1.56641e-06
Pla2r1	18779	1.68435	5.51539e-05		Lifr	16880	1.45666	0.000485467		Maml2	270118	1.62568	2.89872e-05
Gpc6	23888	1.68405	6.57945e-08		Bcam	57278	1.45651	0.000441692		Col4a2	12827	1.62561	4.23864e-06
Itga1	109700	1.68345	0.000197027		Fkbp10	14230	1.45244	0.00697872		Cxcl14	57266	1.6252	1.90516e-05
Timp2	21858	1.68242	5.07521e-05		Ttc28	209683	1.45094	0.000108946		Lphn1	330814	1.6241	6.81267e-06
Itm2a	16431	1.68004	0.000116478		Erg	13876	1.44906	0.000485467		Syne1	64009	1.62318	1.23834e-06
Arhgap28	268970	1.67675	1.60328e-05		Igsf6	80719	1.44834	0.00177987		Marveld1	277010	1.623	0.000258785
She	214547	1.67312	8.043e-07		2010001E11Rik	72045	1.44817	0.00604896		Ank2	109676	1.62296	0.007015
Hpse2	545291	1.67066	0.000375243		AF251705	140497	1.44737	0.000983965		Col14a1	12818	1.62123	0.000395538
Loxl2	94352	1.66892	0.000329346		Btnl9	237754	1.44685	0.000674119		Tbx2	21385	1.61903	0.000111969
Ncam1	17967	1.66668	1.84444e-05		Thbd	21824	1.44653	0.000707721		Kcnip3	56461	1.61861	0.000104243
4930503L19Rik	269033	1.66573	0.000557234		Hcar1	243270	1.44489	0.00040783		Slc9a9	331004	1.61756	7.27222e-05
2016-09-04	18952	1.66492	6.27331e-05		Pcdhb20	93891	1.43899	0.000409292		Stard9	668880	1.61636	5.46712e-06
Rassf2	215653	1.66285	0.00509052		Emilin1	100952	1.4389	0.000642205		Sema7a	20361	1.616	0.000114494
C1qtnf3	81799	1.66202	0.0089552		Pcdhb19	93890	1.43794	0.00138041		Sox18	20672	1.61559	0.000329694
Atp1b2	11932	1.66198	0.000336164		Gli3	14634	1.43736	0.00558928		Fbn1	14118	1.61531	5.98515e-05
Catsperd	106757	1.66171	7.76695e-05		Tgfb3	21809	1.4372	0.00818931		Fscn1	14086	1.61482	0.000172006
Tyrobp	22177	1.65619	0.000117733		Hapln1	12950	1.43555	0.00780591		Rab3il1	74760	1.61352	2.86489e-06
Tbx2	21385	1.65611	5.00371e-05		Cd209g	70192	1.43145	0.00532227		Itga4	16401	1.61198	0.00287161
Cacng7	81904	1.6559	6.09649e-05		Il23r	209590	1.43132	0.00944653		Csf1	12977	1.61155	6.41466e-05
Dock10	210293	1.65533	0.00223669		Adap2	216991	1.43105	0.000674119		Tlr7	170743	1.60932	0.000264615
Slc9a9	331004	1.65363	3.2727e-05		Cpeb1	12877	1.43068	0.000485467		Aplnr	23796	1.60763	0.000787996
Papln	170721	1.65186	6.65413e-06		Clec7a	56644	1.43052	0.00733142		Erg	13876	1.60451	2.09393e-05
Bhlhe41	79362	1.65139	0.000658312		Ccm2l	228788	1.43027	0.000339659		Zfp521	225207	1.60364	9.89971e-05
Gpr182	11536	1.64987	4.16694e-05		Cysltr2	70086	1.42982	1.36222e-05		Cd163	93671	1.60351	8.56312e-05
Clip3	76686	1.64967	0.00045157		Npnt	114249	1.42962	0.00339102		Emilin1	100952	1.60265	2.41321e-05
Gli3	14634	1.64731	0.00016834		Ets1	23871	1.42925	0.00288163		Lair1	52855	1.60075	0.000299325
Col4a1	12826	1.64554	5.41466e-05		Plekho1	67220	1.42898	0.00461335		Sgcd	24052	1.59825	0.00619146
Tril	66873	1.64511	9.80922e-05		Gpr97	54672	1.42838	0.00373494		Clec4n	56620	1.59791	0.00200839
Nkx2-3	18089	1.64155	2.77782e-06		Meox2	17286	1.42821	0.000540014		Slitrk6	239250	1.59649	0.00245369
Myo5a	17918	1.64121	4.43286e-05		Itm2a	16431	1.42811	0.00688936		42617	18952	1.59617	0.000231217
Slitrk6	239250	1.64115	0.00124063		Layn	244864	1.42789	0.00922539		Papln	170721	1.59496	2.37912e-05
Sncaip	67847	1.64084	1.70305e-05		Rbp4	19662	1.42729	0.000668626		Ppic	19038	1.59395	5.95828e-05
Gbp9	236573	1.63961	6.76797e-05		Il2ra	16184	1.42652	0.00391623		Casp12	12364	1.59102	0.00442233
Tlr7	170743	1.63818	0.000137326		Sema3f	20350	1.42626	2.16591e-05		Tspan2	70747	1.591	0.00638386
Sema3f	20350	1.63584	1.02429e-07		Pde7b	29863	1.42566	0.00136157		Smtn	29856	1.58875	0.000383374
Msr1	20288	1.63574	0.00310824		Olfr558	259097	1.42556	0.00988012		Prr16	71373	1.58817	0.000266762
Rgs10	67865	1.63486	7.96466e-05		Gm4951	240327	1.42439	0.00481889		Clec7a	56644	1.57983	0.000707966
Sntg2	268534	1.63423	0.00892972		Nav1	215690	1.42275	2.00009e-05		Dgkb	217480	1.57961	0.000892892
Fbxl7	448987	1.63402	1.73887e-05		Spon2	100689	1.42246	0.000942925		Prelp	116847	1.57947	0.00483112
Acvrl1	11482	1.6306	5.44576e-08		Cmtm3	68119	1.42002	0.00227535		Plek	56193	1.57878	0.00228776
Pcdhb12	93883	1.6305	0.000512045		Dnm3	103967	1.42	0.000708643		Clec4a3	73149	1.5785	0.000707966
Alpl	11647	1.62877	3.59668e-05		P2rx7	18439	1.41995	5.88523e-05		Pla2g2d	18782	1.57612	0.000491492
Hspg2	15530	1.6287	1.92487e-07		Pilra	231805	1.41747	0.00860819		Spon2	100689	1.57542	4.47275e-05
Pcdhb20	93891	1.62828	6.46565e-06		Arhgap23	58996	1.41451	0.000108671		Arhgap23	58996	1.57445	2.12259e-06
Nexn	68810	1.62786	6.189e-05		Fbln7	70370	1.41413	0.000651007		Aoah	27052	1.57332	7.0763e-05
Ttc28	209683	1.62568	1.83596e-06		Myo5a	17918	1.41354	0.00309156		Col6a4	68553	1.57269	5.43384e-05
Satb1	20230	1.62524	0.00750016		Rasip1	69903	1.41244	0.000163646		Itga11	319480	1.57264	0.00137958
Fli1	14247	1.62414	0.00214424		Pard6g	93737	1.4119	0.00515006		Fibin	67606	1.57255	0.00120999
Erg	13876	1.6241	1.1904e-05		Cyth4	72318	1.41187	0.000247734		Csf2rb	12983	1.57238	0.00856776
Hip1	215114	1.62273	0.000121528		Gjc1	14615	1.41176	0.000660951		Ttc28	209683	1.57037	6.81267e-06
Shank3	58234	1.62097	4.31349e-07		Sulf1	240725	1.41125	0.00938167		Rnase6	78416	1.56819	0.00788434
Igf2	16002	1.61945	1.2009e-06		Phxr4	18689	1.41079	0.00841298		Bcam	57278	1.56815	4.51483e-05
Fcrls	80891	1.61923	0.000138021		Shisa3	330096	1.4104	0.00676071		AF251705	140497	1.56732	0.000101092
P2ry13	74191	1.61798	0.000123718		Rftn1	76438	1.40906	0.000560267		Sncaip	67847	1.56497	8.17689e-05
Spon2	100689	1.61659	1.66724e-05		Ptafr	19204	1.40821	0.00547515		Fbxl7	448987	1.56321	7.73586e-05
Sulf1	240725	1.6161	0.000324913		Smtn	29856	1.40711	0.00744982		Pla2r1	18779	1.56115	0.000464582
Hcar1	243270	1.61584	9.71485e-06		Pla2r1	18779	1.4061	0.00646476		Pilra	231805	1.56079	0.000898653
Clip4	78785	1.61536	0.00109165		Ncam1	17967	1.40603	0.00266137		Clip3	76686	1.55949	0.00176852
St8sia6	241230	1.61472	0.000197027		Dchs1	233651	1.40579	0.0018345		Cd4	12504	1.55881	7.23664e-05
Lox	16948	1.61348	0.00122644		Plxna4	243743	1.40516	0.00695906		Ccdc88a	108686	1.55834	0.000501726
Thy1	21838	1.61297	0.000109784		Hhipl1	214305	1.40489	0.00435282		Hip1	215114	1.55686	0.000435948
Cd86	12524	1.61181	0.00324219		Pitx1	18740	1.40313	0.00807		Nav1	215690	1.55603	5.76996e-07
Lilra5	232801	1.61009	0.000717898		Pygm	19309	1.40266	0.00519137		Fcgr4	246256	1.55524	0.00111345
Numbl	18223	1.60941	0.000470146		Fbxl7	448987	1.40114	0.00189163		Pard6g	93737	1.55437	0.000437369
Agtpbp1	67269	1.60895	1.51916e-05		Arhgef15	442801	1.40098	0.000858973		Olfr558	259097	1.55167	0.00141055
Pygm	19309	1.60839	0.000117733		Syde1	71709	1.39967	0.0039827		Bdkrb2	12062	1.54663	2.02758e-05
Dchs1	233651	1.6083	3.02114e-05		Enpp6	320981	1.39915	0.000494164		Gpr65	14744	1.54631	0.00963191
Sox18	20672	1.60813	0.000303039		Arhgap28	268970	1.39881	0.00304937		Fmnl2	71409	1.545	0.000100041
C1qtnf1	56745	1.60526	0.000381882		Bdkrb2	12062	1.39836	0.00058187		Dchs1	233651	1.54365	0.00011982
Cpa6	329093	1.60393	0.000654667		Tmem204	407831	1.39797	0.000586946		Gypc	71683	1.54288	9.249e-05
Mctp1	78771	1.60328	1.19383e-05		Gpr155	68526	1.39738	0.00999013		Tmem176a	66058	1.54279	2.34418e-05
Arhgef6	73341	1.60271	0.000345221		Fkbp7	14231	1.39473	0.000559541		Ccm2l	228788	1.54273	2.72037e-05
Bcam	57278	1.60242	1.84139e-05		Gpc6	23888	1.39413	7.96405e-05		Vsig2	57276	1.54185	1.34416e-05
Aldh1a3	56847	1.60233	4.87042e-05		Gp49a	14727	1.39323	0.0021601		Gpc6	23888	1.54048	1.636e-06
Scn1b	20266	1.6001	9.56008e-06		Nkx2-3	18089	1.39227	0.000728382		Shisa3	330096	1.5401	0.000757557
1700018A04Rik	71307	1.59974	0.00660266		Maml2	270118	1.38996	0.00266559		Tifab	212937	1.5374	0.000579752
Mrc2	17534	1.59852	4.61248e-05		Col4a1	12826	1.38879	0.00591742		Efemp2	58859	1.53684	0.000110326
Ccm2l	228788	1.59702	7.25961e-06		Vwa1	246228	1.38829	0.000393157		Layn	244864	1.5359	0.00167545
Arhgap23	58996	1.59658	1.07907e-06		Fam20a	208659	1.38337	0.00385877		Sdc3	20970	1.53476	0.00111853
Clmp	71566	1.59606	0.00408664		Col18a1	12822	1.38161	0.000642205		Cd86	12524	1.53453	0.00807188
Csf1	12977	1.59461	6.67291e-05		Loxl1	16949	1.37937	0.00763403		Musk	18198	1.53361	0.00229626
Pros1	19128	1.59245	0.000473662		Sox17	20671	1.37732	0.00570159		Folr2	14276	1.53239	0.00286602
Sod3	20657	1.59204	0.00126973		Naalad2	72560	1.37663	0.00155708		Pitx1	18740	1.53218	0.000924726
Fbln7	70370	1.59203	1.22043e-05		Fyn	14360	1.37613	0.000151987		Hic1	15248	1.53195	1.27846e-05
Cd84	12523	1.58977	0.00223669		Hecw2	329152	1.37544	0.00042568		Dnm3	103967	1.53079	6.76144e-05
Ccdc88a	108686	1.58821	0.000252189		Zfp366	238803	1.37405	0.000133537		Tgfb3	21809	1.53038	0.00186204
Ptges	64292	1.58706	0.00186347		Pcdhgb1	93699	1.37368	0.00156932		Chst2	54371	1.52979	0.000166033
Ptgis	19223	1.58599	0.00389655		Plekho2	102595	1.36918	0.00200743		Shank3	58234	1.52895	3.93747e-06
Snx32	225861	1.58509	4.92347e-05		Agtpbp1	67269	1.364	0.0028117		Asb2	65256	1.52852	0.000707462
Gprc5b	64297	1.58452	1.32469e-05		Notch3	18131	1.3607	0.00532227		Tfec	21426	1.52797	0.00120999
Cpeb1	12877	1.58415	1.51916e-05		Pdzd2	68070	1.35999	0.0065468		Il33	77125	1.5278	0.00356751
Rcan2	53901	1.58267	4.15275e-06		St8sia4	20452	1.35999	0.0065445		Tmem88	67020	1.52703	5.18777e-05
Gli1	14632	1.58227	1.89664e-06		Fgd5	232237	1.3597	0.000622227		Cd200	17470	1.5269	0.000649439
Cyp7b1	13123	1.58218	0.00109566		Syt15	319508	1.35953	6.13474e-05		Dnm3os	474332	1.52603	0.000114494
Hapln1	12950	1.5821	0.000682976		Hey2	15214	1.3582	0.00752863		Thy1	21838	1.52505	0.000579752
Bmp6	12161	1.5814	4.12601e-06		Kank3	80880	1.35717	6.84613e-05		Col1a1	12842	1.52378	0.000193271
Musk	18198	1.58067	0.00104167		Chst2	54371	1.35706	0.00527609		Pcdhb16	93887	1.52378	0.00111258
Aebp1	11568	1.58042	0.00344136		Vamp5	53620	1.3568	0.000100223		Ncam1	17967	1.52373	0.000275225
Lair1	52855	1.58026	0.000337369		Elk3	13713	1.35617	0.000156738		Gm11710	100043123	1.52185	8.0126e-05
Prelp	116847	1.57362	0.00482573		Kcnk10	72258	1.35592	0.000888155		Pcdhgb5	93702	1.52094	0.00862251
Fgd5	232237	1.57294	2.77191e-06		Prrt2	69017	1.35496	0.00175019		Nckap1l	105855	1.52077	0.00381637
Tbxas1	21391	1.57238	0.000161347		Slc9a3r2	65962	1.35468	0.00160729		Gpr97	54672	1.52003	0.000722402
Ptger1	19216	1.57232	3.63865e-05		Sntb1	20649	1.35443	0.00844406		Slfn3	20557	1.51821	0.00415808
Lifr	16880	1.57204	3.77191e-05		Cd68	12514	1.35369	0.00676772		Gpr126	215798	1.51792	0.00122875
Emilin1	100952	1.57113	3.54393e-05		Sdk1	330222	1.35334	0.00839267		Hecw2	329152	1.51373	1.30257e-05
Dgkb	217480	1.5708	0.000846541		Gypc	71683	1.35326	0.00454815		Daam2	76441	1.51241	0.00137958
Gjc1	14615	1.56985	1.78974e-05		Snai2	20583	1.3523	0.00748698		Adap2	216991	1.51232	0.00011996
C5ar1	12273	1.56945	0.000468101		Mapk12	29857	1.35159	0.000333959		Sla	20491	1.51109	0.00583294
Il33	77125	1.56863	0.00189363		Mctp1	78771	1.35101	0.00298957		Gnai1	14677	1.51051	0.00253349
Ets1	23871	1.56849	0.000197007		Cd4	12504	1.34986	0.00503759		Evc	59056	1.5103	5.76126e-05
Cyth4	72318	1.56419	5.54027e-06		Dact1	59036	1.34958	0.00616216		Stard8	236920	1.50818	1.29436e-05
Fam171b	241520	1.56404	0.003193		Cldn5	12741	1.34621	0.00429729		Vstm4	320736	1.50801	0.000396779
Adap2	216991	1.564	3.58037e-05		Tenc1	209039	1.34611	4.99243e-05		Myo5a	17918	1.50767	0.0005322
Phxr4	18689	1.5622	0.000616749		Efemp2	58859	1.3454	0.00554767		Pld4	104759	1.50639	0.00313378
Pla2g2d	18782	1.56162	0.00050179		Tpst1	22021	1.34537	0.00125014		Arhgef6	73341	1.50581	0.001767
Rasip1	69903	1.56128	3.59392e-06		Bmp6	12161	1.34324	0.00137482		Hapln1	12950	1.50422	0.00248756
Adcy5	224129	1.56097	0.000822711		Arsj	271970	1.3426	0.00123036		Pip4k2a	18718	1.50344	0.00117195
Layn	244864	1.56053	0.00102574		Pigz	239827	1.34223	0.00830711		Cacng7	81904	1.50201	0.000912035
Plp1	18823	1.55924	0.00046254		Plxdc1	72324	1.34217	0.0011059		Lilra5	232801	1.50151	0.00363323
Aox1	11761	1.55835	3.33986e-05		Snx32	225861	1.34066	0.00733613		Cd68	12514	1.50057	0.000377928
Prdm5	70779	1.5557	0.000697168		Slc30a2	230810	1.34038	0.000610834		Ifnar2	15976	1.49834	0.000232453
Marveld1	277010	1.55553	0.000597809		Rcan2	53901	1.34022	0.0015248		Plekho2	102595	1.49825	0.00011982
Tmem204	407831	1.55542	1.36797e-05		Egflam	268780	1.33943	0.0017472		Tmem154	320782	1.49807	0.00259463
Plekho2	102595	1.55488	3.12603e-05		Adamts2	216725	1.33886	0.000555827		Itgax	16411	1.49746	0.00111853
Vwa1	246228	1.55468	5.76851e-06		Col5a2	12832	1.33675	0.00218625		Rbp7	63954	1.49676	0.00228776
Wwtr1	97064	1.55431	0.00539649		Amotl1	75723	1.33591	0.00261216		Nfatc4	73181	1.49626	6.45139e-05
Rab3il1	74760	1.55119	8.45958e-06		Nfatc4	73181	1.33447	0.00275498		Ecscr	68545	1.49509	0.00472922
Syde1	71709	1.55049	0.000197027		Tacc1	320165	1.33402	0.00477314		Pros1	19128	1.49469	0.00238991
Olfr1034	258216	1.54802	0.00780862		Ifnar2	15976	1.33169	0.00733142		Gli1	14632	1.49393	1.7465e-05
Clec4n	56620	1.54767	0.00338349		Stard8	236920	1.32963	0.00121358		Cmtm3	68119	1.49101	0.000574585
Aoah	27052	1.54741	9.0859e-05		Phldb2	208177	1.32867	0.000767521		Clec1a	243653	1.49099	0.00228963
Parp3	235587	1.54718	1.09868e-07		Fzd2	57265	1.32786	0.00937604		Mfap5	50530	1.49095	0.0037875
Bmp7	12162	1.54714	0.000682383		Hspa12b	72630	1.3272	0.00232915		Tmem204	407831	1.4909	6.68049e-05
Npnt	114249	1.54695	0.00034682		Man2a2	140481	1.3241	0.000364568		Npnt	114249	1.4903	0.00109327
Cysltr2	70086	1.54523	4.88661e-07		Mdfic	16543	1.32258	0.000247734		Syde1	71709	1.49	0.000706707
Bcl6b	12029	1.5452	0.000197027		Cdsn	386463	1.32199	0.000501267		Fam171b	241520	1.48888	0.0083963
Tenc1	209039	1.5441	1.1322e-07		Slc7a2	11988	1.31669	0.00934787		Abcg3	27405	1.48774	0.00509465
Cav2	12390	1.54358	6.01995e-05		Fzd4	14366	1.31633	0.00154987		Slco3a1	108116	1.48686	0.000251741
Maml2	270118	1.54272	0.000103912		Col6a4	68553	1.31561	0.0097889		Ptafr	19204	1.48623	0.00129256
Hhipl1	214305	1.54204	0.000293773		Evc	59056	1.31515	0.00498726		Numbl	18223	1.48532	0.00323798
Pdzd2	68070	1.54139	0.000161095		Slco2b1	101488	1.31515	0.00142254		Gpr161	240888	1.48497	0.000526577
Daam2	76441	1.53904	0.000782334		Hspg2	15530	1.31478	0.000778703		Tspan18	241556	1.48198	0.00301089
Gpr65	14744	1.53876	0.0099684		Gprc5b	64297	1.31439	0.00594837		Acer2	230379	1.48061	8.15347e-06
Itga11	319480	1.53461	0.00206044		Col4a6	94216	1.31374	0.0075886		Csf2rb2	12984	1.47742	0.00258717
Sox17	20671	1.53311	0.000250339		4933411K16Rik	66765	1.31093	0.0040963		Zfp366	238803	1.4759	7.4804e-06
Gpr97	54672	1.5325	0.00048659		Hic1	15248	1.30932	0.00298957		Fzd4	14366	1.4732	2.55183e-05
Adamts2	216725	1.53186	2.67442e-06		Ltbp3	16998	1.3071	0.00429412		Col4a1	12826	1.47041	0.00123653
Rbp7	63954	1.53092	0.00119254		Card6	239319	1.30621	0.0002855		Sgcb	24051	1.46759	0.000745503
Ppp1r3c	53412	1.52983	1.80262e-05		Siglec1	20612	1.30394	0.0011857		Gprc5b	64297	1.46752	0.000179166
Cmtm3	68119	1.5288	0.00023492		Hey1	15213	1.30382	0.00750229		Cnn2	12798	1.46615	0.00697963
Aff3	16764	1.5285	0.00161134		Pld2	18806	1.3028	0.00761304		St8sia4	20452	1.46553	0.000803653
Arhgef15	442801	1.52823	4.42362e-05		Gm11710	100043123	1.30181	0.00941721		Arhgef15	442801	1.4653	0.000201008
Vstm4	320736	1.52803	0.000222448		Lrrtm3	216028	1.30161	0.00647227		Rftn1	76438	1.46514	0.000148449
Kcnip3	56461	1.52557	0.000401549		Cadm2	239857	1.30088	0.000907349		Gpr155	68526	1.46451	0.00301603
Fam20a	208659	1.52437	0.000198293		Ppp1r3c	53412	1.29992	0.00521885		Fgd5	232237	1.46442	4.28805e-05
Cadm3	94332	1.52422	0.000343743		Tmem176b	65963	1.29979	0.000258031		Tlr11	239081	1.46393	0.00886285
Abcg3	27405	1.52417	0.00289643		Far2	330450	1.29918	0.000452654		Itgb2	16414	1.46383	0.00156539
Naalad2	72560	1.52411	5.10064e-05		Slc25a45	107375	1.29889	0.000613066		Arhgap28	268970	1.46197	0.000856169
Loxl1	16949	1.52377	0.00047543		Myct1	68632	1.29866	0.00506739		Mchr1	207911	1.46191	0.00286604
Mapk12	29857	1.5226	2.67381e-06		Ramp3	56089	1.29204	0.00937604		Id4	15904	1.46143	0.00570288
Lrrtm3	216028	1.52224	3.2727e-05		Ufsp1	70240	1.2913	8.623e-05		Robo1	19876	1.46052	0.000791479
Bdkrb2	12062	1.5222	2.72114e-05		Tmem176a	66058	1.29114	0.00764588		Plxdc1	72324	1.45841	5.89732e-05
Siglec1	20612	1.521	2.54576e-06		Dtx3	80904	1.29021	0.00790717		Pygm	19309	1.45781	0.00175663
Wasf3	245880	1.52061	0.00183772		Tmem237	381259	1.28659	0.00297117		Palmd	114301	1.45687	0.0005322
Prrt2	69017	1.52047	3.31122e-05		Cd302	66205	1.28635	0.00300859		Tpst1	22021	1.45509	8.29273e-05
St6galnac5	26938	1.51833	0.00682668		Ache	11423	1.2855	0.00209831		Adamtsl2	77794	1.45408	0.00117525
Mpdz	17475	1.51812	0.00158178		Ttc12	235330	1.28349	0.00419934		Gjc1	14615	1.45385	0.000248364
Cercam	99151	1.51762	5.61493e-05		Chst15	77590	1.28193	0.0045691		Alpl	11647	1.4535	0.00099973
Col1a1	12842	1.51654	0.000179575		Gpihbp1	68453	1.27554	0.00347515		Hcar1	243270	1.453	0.000311619
P2rx7	18439	1.51152	4.14146e-06		Xcr1	23832	1.2751	0.00679467		Sdk1	330222	1.45262	0.00119996
Aplnr	23796	1.51033	0.00265021		Ptgr1	67103	1.2749	0.00814209		Notch3	18131	1.45224	0.000809033
Nckap1l	105855	1.50952	0.00408737		Tfpi	21788	1.26916	0.00232606		Hhipl1	214305	1.45186	0.00164872
Cmklr1	14747	1.50695	0.000641407		Dak	225913	1.26735	0.0020002		Nkx2-3	18089	1.45078	0.000181673
S1pr3	13610	1.50648	0.00161134		Gria4	14802	1.26709	0.00447684		Tram2	170829	1.45041	0.00082764
St8sia4	20452	1.50606	0.000313861		Clps	109791	1.26415	0.00752817		Mdfic	16543	1.44959	4.68121e-06
Fyn	14360	1.50566	3.59392e-06		Thbs3	21827	1.26379	0.00804034		Aff3	16764	1.44673	0.00583819
Plxdc1	72324	1.50517	1.57791e-05		Pced1b	239647	1.26277	0.00805472		S1pr3	13610	1.44621	0.00448026
Sdk1	330222	1.50511	0.000384712		Tbx1	21380	1.26087	0.00447684		Prickle1	106042	1.4443	0.000629892
Pld4	104759	1.50498	0.00294548		Kirrel	170643	1.26059	0.00877118		Fbln7	70370	1.44401	0.000313964
Notch3	18131	1.50478	0.000242594		Ccl9	20308	1.2583	0.00878368		Agtpbp1	67269	1.44355	0.000491492
Plat	18791	1.50469	0.000641767		Ano6	105722	1.25135	0.000522108		Itga1	109700	1.44053	0.00689357
Cep170	545389	1.5035	0.000560688		Eya4	14051	1.24998	0.00392258		N28178	230085	1.43936	0.00730872
Slc9a3r2	65962	1.50243	4.32275e-05		Pkd2	18764	1.24499	0.0011059		Tnfaip2	21928	1.4384	0.00133805
Robo1	19876	1.50151	0.00030199		Tspyl2	52808	1.24278	0.0038016		Lifr	16880	1.4384	0.000645321
Hecw2	329152	1.50137	1.43187e-05		Gas7	14457	1.24124	0.000967801		Fzd2	57265	1.43833	0.000949191
Hey2	15214	1.50095	0.000403472		Nefh	380684	1.24045	0.0084751		Wnt5a	22418	1.43709	0.00989025
Prr16	71373	1.50021	0.000934031		Sema4c	20353	1.23943	0.0029668		Mrc2	17534	1.43637	0.00113162
Evc	59056	1.49528	6.189e-05		Dach1	13134	1.23836	0.000494164		Tmem176b	65963	1.43423	2.94361e-06
Ablim3	319713	1.49452	0.000652217		Pea15a	18611	1.23341	0.00150878		Cysltr2	70086	1.43343	1.10521e-05
Nrg1	211323	1.49412	0.00923975		Gpc1	14733	1.23331	0.00487458		Man2a2	140481	1.43217	1.34594e-05
Tlr11	239081	1.4931	0.00582028		Rsu1	20163	1.23018	0.00252621		Bmp6	12161	1.43103	0.00015253
Gm10855	100038708	1.49207	0.00235493		Bcap29	12033	1.22951	0.0029668		Icam1	15894	1.4297	0.00495148
Tacc1	320165	1.49158	0.000119728		Rgs6	50779	1.22869	0.00558699		Mfap2	17150	1.42903	0.00374091
Sema3d	108151	1.49128	0.0088338		Tcf4	21413	1.2285	0.00472809		Kank3	80880	1.42772	7.1615e-06
2010001E11Rik	72045	1.49094	0.00247912		Rcbtb2	105670	1.22805	0.00142776		Sulf1	240725	1.42701	0.00623192
Snai2	20583	1.48971	0.000418862		Emid1	140703	1.2262	0.00947341		Ndst3	83398	1.4265	0.00413323
Pitx1	18740	1.48944	0.00156406		Lmcd1	30937	1.21924	0.0085071		Ccbe1	320924	1.42564	0.000459434
BC028528	229600	1.48832	0.00285875		Sorbs3	20410	1.21706	0.00969669		Sntb1	20649	1.4247	0.00205174
Efemp2	58859	1.48713	0.000233542		Pik3r6	104709	1.21651	0.00838809		Adamts2	216725	1.42407	5.11711e-05
Btnl9	237754	1.48678	0.000233394		L3mbtl4	320858	1.21484	0.00453391		Atp8b2	54667	1.42364	5.98392e-05
Arhgef9	236915	1.48364	0.00098339		Taf9b	407786	1.21044	0.00920255		P2ry12	70839	1.42201	0.00881931
Gp49a	14727	1.48133	0.000286139		Tgfbr2	21813	1.20485	0.000891496		Flt3	14255	1.4217	0.00586843
Scara3	219151	1.47815	0.000136381		Rbms1	56878	1.20448	0.00558928		Gpr4	319197	1.42087	0.00574535
Olfr558	259097	1.47652	0.00375798		Efcc1	58229	1.1974	0.000764984		Snx32	225861	1.42032	0.00134144
Gpr161	240888	1.47459	0.000525418		Mtap7d3	320923	1.19701	0.00649452		Elk3	13713	1.42019	2.29321e-05
Ushbp1	234395	1.47393	0.00066835		Cst3	13010	1.18798	0.000423747		Rasip1	69903	1.4201	0.000124657
Col5a2	12832	1.47383	6.58717e-05		Twsg1	65960	1.18486	0.000414571		Ackr3	12778	1.41914	0.00339905
Amotl1	75723	1.47257	8.30726e-05		Alg6	320438	1.18319	0.00604896		Col5a2	12832	1.41744	0.000299325
Man2a2	140481	1.47181	3.62744e-06		Impact	16210	1.18258	0.00209804		Pcdhga6	93714	1.4172	0.00497941
Parvb	170736	1.47118	4.73008e-05		Hpse	15442	1.17088	0.00349592		Esm1	71690	1.41432	0.00867024
Col18a1	12822	1.47013	5.91951e-05		2410002F23Rik	668661	1.17016	0.00268947		Hspa12b	72630	1.41365	0.000265547
Fzd2	57265	1.46863	0.000441378		Arl1	104303	1.16639	0.00901339		Hspa2	15512	1.41224	0.00741139
Pknox2	208076	1.4669	0.000314987		Tmem5	216395	1.1645	0.0032634		Cep170	545389	1.4122	0.00318942
Plxna4	243743	1.46656	0.00198438		Pqlc3	217430	1.16444	0.00652373		Mpdz	17475	1.41005	0.00858859
Ndst3	83398	1.46647	0.00195879		Exosc10	50912	1.16196	0.00481889		Thbs3	21827	1.40966	0.000168542
Tmem154	320782	1.46623	0.00379152		Tnip2	231130	1.15684	0.00660602		Pde4b	18578	1.40909	0.000882215
Il2ra	16184	1.46485	0.00157786		Nfix	18032	1.15304	0.00780591		Plp1	18823	1.40897	0.00580423
Phldb2	208177	1.46371	1.59408e-05		Dnlz	52838	1.14609	0.000764984		Aox1	11761	1.40826	0.000893263
Il23r	209590	1.46256	0.0047986		Nedd4	17999	1.14196	0.00340881		Cldn5	12741	1.40807	0.00103076
Tmem88	67020	1.46209	0.000159937		Tmem165	21982	1.13998	0.00413524		Amotl1	75723	1.40469	0.000491492
Nfatc4	73181	1.46109	0.000111269		Zfp346	26919	1.11997	0.00896058		Meox2	17286	1.40361	0.000848368
Dnm3os	474332	1.46094	0.000342132		Gatad1	67210	1.08066	0.00490135		Hey2	15214	1.40278	0.00283704
Gypc	71683	1.46083	0.000373669		Atxn2l	233871	-1.08371	0.00408063		Arsj	271970	1.40274	0.000261316
Chn1	108699	1.4605	0.0043949		Abi1	11308	-1.0902	0.00288163		Tacc1	320165	1.40226	0.000968179
Tpst1	22021	1.46017	5.83854e-05		Psen1	19164	-1.09632	0.00515831		Dtx3	80904	1.40021	0.00055482
Meox2	17286	1.45978	0.000204855		Golph3	66629	-1.09755	0.00826834		Myl4	17896	1.39908	0.00115461
Plek	56193	1.45943	0.00933434		Car4	12351	-1.09858	0.00813619		Enpp6	320981	1.39705	0.00048746
Gm4951	240327	1.45872	0.00211524		Crebbp	12914	-1.1046	0.00841298		Vamp5	53620	1.39664	2.78346e-05
Aldh1a2	19378	1.4581	0.00492389		Sppl2b	73218	-1.10676	0.00988301		Mgl2	216864	1.39385	0.00895198
Cdk14	18647	1.45758	0.000668359		Trappc9	76510	-1.10795	0.00520662		Slc12a4	20498	1.39339	0.000251885
Igsf6	80719	1.45638	0.00122644		Nelfb	58202	-1.11093	0.00562706		Ppp1r18	76448	1.39287	0.00933285
Lgi4	243914	1.45606	0.000648861		Sap130	269003	-1.11095	0.00444532		Trib2	217410	1.39269	0.00497941
Cxcr6	80901	1.45596	0.00538962		Ncstn	59287	-1.11281	0.00263339		Cav2	12390	1.39082	0.0015878
Zfpm2	22762	1.45423	0.00435827		Tmem63a	208795	-1.12097	0.00763403		Exoc3l2	74463	1.39076	0.00019979
Kank3	80880	1.45377	2.77191e-06		Bag6	224727	-1.12117	0.00718433		Hey1	15213	1.39021	0.000968179
Plscr2	18828	1.453	0.00694968		Git1	216963	-1.12246	0.00637972		Mir694	751558	1.38976	0.00157387
Kcnk10	72258	1.45291	6.27331e-05		Foxa1	15375	-1.12379	0.00917349		Fyn	14360	1.38906	9.9166e-05
Dtx3	80904	1.45123	0.000138021		Zfand3	21769	-1.12421	0.00505991		Plxna4	243743	1.38868	0.00757373
Sorbs3	20410	1.45042	6.04221e-06		Gga1	106039	-1.12422	0.00475706		Syt15	319508	1.38774	2.40063e-05
Gpr4	319197	1.45036	0.00339063		Gps2	56310	-1.12513	0.00516679		Nab2	17937	1.3861	0.00118357
Thbs3	21827	1.44996	5.03025e-05		Acy3	71670	-1.12874	0.00668849		Fads1	76267	1.38538	0.00227309
Mdfic	16543	1.44847	3.98602e-06		Spire2	234857	-1.12906	0.00841298		Scgb3a1	68662	1.38419	0.00890439
Zfp366	238803	1.44551	1.39923e-05		Pqbp1	54633	-1.12964	0.00503759		Gm4951	240327	1.38335	0.00784414
Slco2b1	101488	1.44388	3.63865e-05		Irf6	54139	-1.12999	0.00305891		Dram1	71712	1.38327	0.00442951
Slc7a2	11988	1.44354	0.000519576		Naga	17939	-1.13	0.00137482		Zfp57	22715	1.38325	0.00167545
Flt3	14255	1.44273	0.00394464		Lrp6	16974	-1.13223	0.00126914		Il2ra	16184	1.38275	0.00689357
Tfec	21426	1.44023	0.0041448		Nck2	17974	-1.13328	0.00995063		Bcl6b	12029	1.38242	0.00436839
Ccr2	12772	1.43811	0.00914081		Klf3	16599	-1.13494	0.00372393		Lrrc7	242274	1.38182	0.00879635
Hdgfrp3	29877	1.43688	0.00122644		Rhog	56212	-1.13572	0.00675148		Negr1	320840	1.38175	0.00157845
Wdfy4	545030	1.43461	0.00775368		Ubl7	69459	-1.13633	0.000494164		Myh10	77579	1.3816	0.000414048
Lrrc7	242274	1.43307	0.00367968		Rplp2	67186	-1.13774	0.00754325		Mapk12	29857	1.38029	0.0001354
Pcdhgb1	93699	1.43139	0.000342789		Nhsl1	215819	-1.13792	0.00160729		Npr1	18160	1.37942	0.00443027
Pigz	239827	1.4312	0.00115709		B4galt3	57370	-1.13862	0.00234036		Runx2	12393	1.3785	6.6551e-05
Gsn	227753	1.43111	0.000110801		Trp53inp2	68728	-1.13946	0.00184137		Scn1b	20266	1.37795	0.00123653
Sntb1	20649	1.43076	0.00160407		Rab3ip	216363	-1.14071	0.00432496		Pitpnc1	71795	1.37771	0.00240969
Hspa12b	72630	1.42935	0.000147033		Tnk1	83813	-1.14254	0.0084751		Cys1	12879	1.37618	0.00522834
Rbp4	19662	1.42925	0.00049555		Misp	78906	-1.14304	0.00791273		Sorbs3	20410	1.37574	6.5532e-05
Fmnl2	71409	1.42685	0.000832582		Tcf7l2	21416	-1.14343	0.00503759		Fkbp7	14231	1.37417	0.000840399
Hic1	15248	1.42649	0.000119728		Tor1aip2	240832	-1.14435	0.00380918		Nucb2	53322	1.374	0.00992387
Trpv2	22368	1.4261	0.00529487		Hgs	15239	-1.14451	0.000767521		Fam20a	208659	1.37362	0.00395393
Ackr3	12778	1.42537	0.00279534		Mboat7	77582	-1.14543	0.00679467		Mn1	433938	1.37353	0.00853485
Cd68	12514	1.42486	0.00130481		Fibp	58249	-1.14857	0.00891458		Cpeb1	12877	1.37181	0.00155337
Cldn5	12741	1.42387	0.000622058		Tmem180	75146	-1.15008	0.00523961		Prrt2	69017	1.37124	0.00112231
Cxx1c	72865	1.4229	0.00205046		Med15	94112	-1.1514	0.000303479		Cmklr1	14747	1.37103	0.00740433
Slc24a5	317750	1.42285	0.000801202		Cnppd1	69171	-1.15149	0.0029668		Cyth4	72318	1.37083	0.000625357
Rftn1	76438	1.42112	0.000326513		Trim8	93679	-1.1515	0.000540014		Sox17	20671	1.37064	0.00544099
Creb5	231991	1.42093	0.000644025		Leprotl1	68192	-1.15286	0.00545211		Dzip1	66573	1.36913	0.0015878
Cyp2j9	74519	1.42079	0.00355358		Ralgps2	78255	-1.15337	0.00812113		Slc25a4	11739	1.36642	0.00473781
Cd200	17470	1.41861	0.00349277		Smad3	17127	-1.15344	0.00967089		Cxx1c	72865	1.36546	0.00629232
Evi2a	14017	1.41834	0.00450712		Tapbpl	213233	-1.15458	0.0089556		Nexn	68810	1.36451	0.00694495
Rcsd1	226594	1.41753	0.0027583		Hmg20b	15353	-1.15587	0.00171421		Itpkb	320404	1.36436	0.000784501
Chst15	77590	1.4168	9.7475e-05		Mlxip	208104	-1.15588	0.00566797		Col18a1	12822	1.36337	0.000916811
Ltbp3	16998	1.41598	0.000228567		Sema4a	20351	-1.1559	0.0011857		Pknox2	208076	1.36233	0.00307002
Gria4	14802	1.41549	5.29793e-05		Ugcg	22234	-1.15614	0.00674062		Pde1b	18574	1.35956	0.000853068
Esm1	71690	1.41508	0.00822229		Taf4a	228980	-1.15641	0.000764984		Glis2	83396	1.35934	6.29019e-05
Prickle1	106042	1.41445	0.000974269		Ifih1	71586	-1.15698	0.00839267		Slco2b1	101488	1.35903	0.000415658
Pitpnc1	71795	1.41402	0.000992268		Vps72	21427	-1.15832	0.00224023		Prkd1	18760	1.35488	0.00152081
Sh2d3c	27387	1.41292	0.000682976		Smad1	17125	-1.15845	0.00635071		Pcdhb18	93889	1.35448	0.00207712
Kcna1	16485	1.41261	0.00790928		Iqsec2	245666	-1.1587	0.00413524		Btnl9	237754	1.3542	0.00389188
Leprel2	14789	1.41235	0.00021738		Mark2	13728	-1.15992	0.000571461		Tgfb1	21803	1.35395	0.00815778
Pip4k2a	18718	1.41214	0.00464133		Tead3	21678	-1.16188	0.00196117		Ppap2a	19012	1.3537	0.00258927
Lphn1	330814	1.41159	0.000473662		Cnnm3	94218	-1.16244	0.00839267		Chrnb1	11443	1.3536	0.00120447
Ddah2	51793	1.40985	0.000280042		4933426M11Rik	217684	-1.1628	0.00733142		Cadm3	94332	1.35178	0.00836518
Nynrin	277154	1.40851	0.000559713		Liph	239759	-1.16295	0.00859244		Cadm2	239857	1.35098	0.00019257
Hey1	15213	1.40834	0.000543771		Zfp7	223669	-1.16325	0.00255932		Trappc2	66226	1.35059	0.00700331
Csgalnact1	234356	1.40813	0.00177968		Fbxl19	233902	-1.16327	0.0065241		Mctp1	78771	1.34857	0.00277329
Ahi1	52906	1.40783	0.00543616		Mef2d	17261	-1.16336	0.0014362		Rcan2	53901	1.34824	0.00117095
Card6	239319	1.40702	8.25085e-06		Casz1	69743	-1.16452	0.00984014		Tlr8	170744	1.34788	0.00860151
Tfap2a	21418	1.40575	0.000155148		Efnb2	13642	-1.1648	0.00468887		Rora	19883	1.34779	0.0015453
C1qtnf2	69183	1.40481	0.00149195		Kat2b	18519	-1.16711	0.0050193		Soga1	320706	1.34673	0.00161307
Dact1	59036	1.40443	0.00158525		Arrdc1	215705	-1.16728	0.000120912		Ltbp3	16998	1.3442	0.0015181
Vamp5	53620	1.40372	1.81195e-05		Nlrp6	101613	-1.16868	0.00126855		Pik3r6	104709	1.3434	0.000129881
Clec12a	232413	1.40364	0.00242543		Itpkc	233011	-1.16931	0.00660005		Pld2	18806	1.34326	0.00265747
Rora	19883	1.40199	0.000361239		Col20a1	73368	-1.16977	0.00752863		Trpv4	63873	1.34144	0.00477409
Itpkb	320404	1.40184	0.000253383		Parp16	214424	-1.17002	0.00304645		Pcdhb21	93892	1.34108	0.0029106
Adcy7	11513	1.40158	0.00998307		2310061I04Rik	69662	-1.17061	0.00198585		Lgi4	243914	1.34006	0.00685875
Myl4	17896	1.40122	0.000936171		Tmem184b	223693	-1.17154	0.00522408		Ppp1r3c	53412	1.33939	0.001767
Gpr155	68526	1.40041	0.00754874		Pigs	276846	-1.17205	0.000682856		Gadd45g	23882	1.3376	0.00992387
Fkbp7	14231	1.39941	0.000378761		Sertad2	58172	-1.1739	0.00241716		Smim3	106878	1.33742	0.00359074
Tll1	21892	1.39903	0.00137866		Pgap3	320655	-1.17599	0.00752863		Irak3	73914	1.33653	0.00262102
Cdsn	386463	1.39875	3.98555e-05		Peli1	67245	-1.17842	0.00870225		Fam13c	71721	1.33601	0.00606758
Atp10d	231287	1.39789	0.00574003		Itfg3	106581	-1.17868	0.00199912		Efcc1	58229	1.33592	1.2627e-06
Asb2	65256	1.39715	0.00547337		Ticam1	106759	-1.1789	0.000494164		Igf2	16002	1.33567	0.00115339
Pard6g	93737	1.39682	0.00523597		Clec2d	93694	-1.17956	0.00697261		Il6st	16195	1.33546	0.00152456
Stard8	236920	1.3932	0.000178008		Wwp2	66894	-1.17976	0.00367927		Pilrb1	170741	1.3342	0.00322145
Mchr1	207911	1.39154	0.0080337		Grn	14824	-1.18108	0.000443922		Ushbp1	234395	1.33306	0.00986523
Klhl23	277396	1.39083	0.00752241		Hexim1	192231	-1.18199	0.00378711		Arhgef10	234094	1.3318	0.00180112
Serpinf1	20317	1.38864	0.00117491		Clrn3	212070	-1.18249	0.000702709		Cd44	12505	1.32968	0.00815778
Slc12a4	20498	1.38768	0.00023492		Zp2	22787	-1.18305	0.00944653		Pigz	239827	1.32943	0.00876476
Pld2	18806	1.38646	0.000883347		Ptprj	19271	-1.18349	0.00177987		Spry4	24066	1.32896	0.0099793
Sspn	16651	1.38583	0.00232923		Trim25	217069	-1.18481	0.00813948		Ptch1	19206	1.32827	0.000236033
Adamtsl1	77739	1.38466	0.00410356		Prickle3	54630	-1.18596	0.00472809		Gpc1	14733	1.32711	0.000214005
AU021092	239691	1.38266	5.10064e-05		Ctdsp2	52468	-1.18681	0.00159006		Dennd2a	209773	1.32494	0.000313163
Pdlim4	30794	1.38212	0.00059487		Tspan1	66805	-1.18752	0.00042568		Trim47	217333	1.32414	0.000722402
BC100451	58251	1.38169	0.00123348		Rnf31	268749	-1.18753	0.000443225		Myo1f	17916	1.32335	0.00372786
Adamtsl2	77794	1.3816	0.00394464		Max	17187	-1.18757	0.00685822		Aldh1a3	56847	1.32297	0.00992387
Pcdhga6	93714	1.38069	0.00842788		Mxd1	17119	-1.18781	0.00232223		Hrct1	100039781	1.32285	0.00520311
Tifab	212937	1.38014	0.00704711		Tpra1	24100	-1.18839	0.000727202		Leprel2	14789	1.32138	0.00238661
Eya4	14051	1.37964	5.51539e-05		Camsap3	69697	-1.18884	0.000398462		2700081O15Rik	108899	1.32113	0.000987521
Kcnb1	16500	1.37844	0.00672022		Plekha7	233765	-1.18965	0.00705898		Plcb1	18795	1.32087	0.001767
Zc3h12b	547176	1.37782	0.00673211		Spint2	20733	-1.19018	0.000610542		Zc4h2	245522	1.32076	0.00672918
AF251705	140497	1.37661	0.0032271		Cblc	80794	-1.19096	8.623e-05		Smoc1	64075	1.31982	0.00404786
Dnm1	13429	1.37643	0.00202447		Psmf1	228769	-1.19168	0.00095974		Dact1	59036	1.31886	0.00917731
Cybrd1	73649	1.37507	0.00396256		Tgif1	21815	-1.19491	0.00232606		Ramp3	56089	1.31791	0.00445301
Sgip1	73094	1.37423	0.00863641		Cldn3	12739	-1.19542	0.000611441		Parvb	170736	1.31645	0.00244298
Slc25a45	107375	1.37201	4.73008e-05		Smg9	71997	-1.19706	0.00155708		Pmepa1	65112	1.31466	0.0025762
Lama5	16776	1.3716	0.000173659		Mcoln3	171166	-1.1978	0.00853023		Calhm2	72691	1.31464	0.00652981
Elk3	13713	1.37124	7.38734e-05		Capn9	73647	-1.198	0.00277196		St3gal2	20444	1.31441	0.00414588
Arhgap6	11856	1.37123	0.00771067		Map1lc3a	66734	-1.20037	0.00984014		Ssc5d	269855	1.31401	0.00651851
Tmem237	381259	1.36944	0.000231016		Mcl1	17210	-1.20064	0.00517493		Hyou1	12282	1.31379	0.0063008
Gm10790	100038577	1.369	0.0056224		Bcat2	12036	-1.20106	0.00967946		Dock4	238130	1.31315	0.0013794
Col6a4	68553	1.36758	0.00266887		Dusp18	75219	-1.20176	0.00105802		Fam105a	223433	1.313	0.00658537
Pcdhb14	93885	1.36749	0.00562424		Ip6k1	27399	-1.20201	0.00361919		Fndc4	64339	1.31242	0.0040289
Cadm2	239857	1.36587	9.99148e-05		Tacc2	57752	-1.20243	0.00207627		Emid1	140703	1.31223	0.00065729
Tnfaip2	21928	1.36434	0.00484075		Hist1h1t	107970	-1.20502	0.00739913		Hspa5	14828	1.31222	0.00356844
Gpr146	80290	1.36296	0.00385423		Zfp574	232976	-1.20576	0.00812113		Sh2d3c	27387	1.31122	0.0068319
St3gal2	20444	1.36265	0.00122136		Tmem63b	224807	-1.20584	0.000191449		Sema4c	20353	1.31019	0.000255142
Pik3r6	104709	1.36264	5.76651e-05		Styxl1	76571	-1.20652	0.00383487		Creb5	231991	1.30814	0.00777986
Syt15	319508	1.36245	4.26649e-05		Mettl20	320204	-1.20769	0.00565622		Cercam	99151	1.3073	0.00623421
Icos	54167	1.36148	0.00120979		Dnajb1	81489	-1.20795	0.00942635		Fgf10	14165	1.30703	0.000592153
Slc25a4	11739	1.36011	0.00498385		Mapk13	26415	-1.20805	0.000339659		Col4a6	94216	1.3062	0.00742973
Piezo2	667742	1.35957	0.00723971		Trim16	94092	-1.20816	0.00309156		Ptpn14	19250	1.30506	0.0014114
Opcml	330908	1.35813	0.00552387		Cbx2	12416	-1.20829	0.00196117		Clps	109791	1.30145	0.00248756
Fzd4	14366	1.35786	0.000398467		Ap5z1	231855	-1.20952	0.00365092		Naalad2	72560	1.30139	0.00718113
Ssc5d	269855	1.35559	0.00247933		Cish	12700	-1.20997	0.00788661		Hsp90b1	22027	1.3011	0.000101206
Gata4	14463	1.35317	0.00754874		Zswim3	67538	-1.20999	0.00562863		Lcp2	16822	1.2988	0.00815778
Trpv4	63873	1.35304	0.00349277		Gsdmd	69146	-1.21017	0.00190538		Lrrtm3	216028	1.29818	0.00583819
Pced1b	239647	1.35296	0.000577389		Ubald1	207740	-1.21079	0.00112381		Trim35	66854	1.2981	0.00134841
Dram1	71712	1.34884	0.00768318		Gcnt2	14538	-1.21088	0.0065241		Pycr1	209027	1.29665	0.00413323
Snora74a	436583	1.3479	0.00120674		Foxd2	17301	-1.21191	0.000668626		Chst15	77590	1.29587	0.00271368
Cpt1c	78070	1.34784	0.000283589		Foxn3	71375	-1.21224	0.00432402		Pea15a	18611	1.2955	0.000139231
Ptch1	19206	1.34754	0.000103594		Tapbp	21356	-1.2124	0.0015564		Kdelr3	105785	1.29469	0.00837377
Egflam	268780	1.34736	0.00115461		Oxct1	67041	-1.21347	0.00147639		Myct1	68632	1.29421	0.00477409
Myct1	68632	1.34707	0.00119254		1700008O03Rik	69349	-1.21817	0.0093657		Dclk2	70762	1.29369	0.00863857
Dclk2	70762	1.34687	0.00256551		Pcdh1	75599	-1.21998	0.00186533		LOC102632565	102632565	1.29097	0.00689458
Sgcb	24051	1.34536	0.00660684		Dclre1a	55947	-1.22246	0.00448849		Parp3	235587	1.29014	0.000325543
Ptgr1	67103	1.34375	0.00114125		Cpvl	71287	-1.22256	0.00207627		Egflam	268780	1.28975	0.00519701
Dak	225913	1.34225	0.000147035		Mst1r	19882	-1.22355	0.000702709		Pitpnm2	19679	1.28947	0.00275396
Ttc12	235330	1.34073	0.000682448		Pllp	67801	-1.22394	0.000366582		Ddah2	51793	1.28658	0.00610848
Tmem176b	65963	1.34037	4.82017e-05		Fbxo33	70611	-1.22642	0.00265298		Plod1	18822	1.28647	0.000499699
Trpm2	28240	1.34012	0.00516303		Tas1r3	83771	-1.22781	0.0011857		Olfm1	56177	1.28596	0.00634264
Prkd1	18760	1.3391	0.00195148		Tmem39b	230770	-1.22825	0.00142254		Il6ra	16194	1.28542	0.00252485
Pde1b	18574	1.3381	0.00122644		Btn1a1	12231	-1.22853	0.00944653		Cacna1d	12289	1.28378	0.00374202
Fgf10	14165	1.33571	0.000198293		Ss18l1	269397	-1.22885	0.00573935		Gpihbp1	68453	1.28211	0.00253998
Atp10a	11982	1.33548	0.00770064		Neurl1b	240055	-1.23273	0.00938167		I830077J02Rik	433638	1.28063	0.00454658
Npr1	18160	1.33446	0.00933434		Irak2	108960	-1.23316	0.00309293		Tspan9	109246	1.28007	0.0029799
Col4a6	94216	1.33291	0.00394779		Parp12	243771	-1.23407	0.00105802		Arhgap22	239027	1.27948	0.000393124
Ppap2a	19012	1.33208	0.00377861		Foxo3	56484	-1.23549	0.00859244		Xcr1	23832	1.27714	0.00544003
Pkd2	18764	1.33198	3.62153e-05		Tnip1	57783	-1.23602	0.00151812		Grk5	14773	1.2764	0.000501726
S1pr2	14739	1.33166	0.00463783		Pitpnm3	327958	-1.23694	0.00733613		Tbx1	21380	1.27547	0.00253998
Ano6	105722	1.33127	1.81483e-05		Tspan7	21912	-1.23796	0.000172537		Cd97	26364	1.27452	0.000797057
Uggt2	66435	1.33004	0.0013279		Lmo4	16911	-1.23806	0.000651007		Ehd4	98878	1.27429	0.00483112
Lmcd1	30937	1.32959	0.000194022		Mkrn1	54484	-1.23887	0.00194112		Anxa5	11747	1.27298	6.9029e-05
Mmp13	17386	1.32619	0.00898446		Cnksr1	194231	-1.2396	2.20959e-05		Ccdc85a	216613	1.27141	0.0061133
Pter	19212	1.32588	0.0034443		Ppp1r3d	228966	-1.24046	0.00718433		Ccl9	20308	1.2705	0.00544021
Slco3a1	108116	1.32443	0.00604649		Spns1	73658	-1.24136	0.000823635		Map7d1	245877	1.27047	0.00221934
Gpihbp1	68453	1.32421	0.000663957		Acd	497652	-1.2445	0.00192256		Flt3l	14256	1.269	0.0014114
Mmp23	26561	1.32284	9.28105e-05		Lhfpl2	218454	-1.24536	0.00207015		Eya4	14051	1.26768	0.0019998
Cd302	66205	1.32174	0.000878512		2900026A02Rik	243219	-1.25036	0.00030503		Rhobtb1	69288	1.26751	0.00711645
Tmem176a	66058	1.31964	0.00310842		Rnf19b	75234	-1.25125	0.000885438		Smarcd3	66993	1.26648	0.00609585
Dock4	238130	1.31773	0.00105473		Cx3cl1	20312	-1.25153	0.000265295		42624	52398	1.26588	0.00337263
Cuedc1	103841	1.31611	0.00391341		Serpinc1	11905	-1.25605	0.00348419		Fbl	14113	1.26257	0.00265301
Gatsl3	71962	1.31537	0.00580713		Pnpla2	66853	-1.2562	3.17576e-05		Twsg1	65960	1.26251	5.4527e-06
Sfxn4	94281	1.31485	0.00539649		Klrb1a	17057	-1.25711	0.00289535		Pced1b	239647	1.26185	0.0069023
Ackr1	13349	1.31436	0.00933434		Phyhipl	70911	-1.2594	0.00941721		Lmcd1	30937	1.26119	0.00200793
Zbtb20	56490	1.31393	0.00268915		St6gal2	240119	-1.26095	0.00860819		P2rx7	18439	1.26004	0.00439992
Phyhd1	227696	1.31387	0.00213287		Efna1	13636	-1.26317	0.00639368		Oaf	102644	1.25976	0.00862906
Calhm2	72691	1.31315	0.00633255		Zfp949	71640	-1.26382	0.00115575		Far2	330450	1.25964	0.00148593
Gbgt1	227671	1.31283	0.00408929		Slco2a1	24059	-1.26447	0.00472809		Col5a1	12831	1.25874	0.000680336
Hrct1	100039781	1.31162	0.00616506		Fam19a3	329731	-1.26458	0.00705898		Lman1	70361	1.25799	0.000274867
Arsj	271970	1.31157	0.00220155		Fgd6	13998	-1.26463	0.000111038		H6pd	100198	1.25718	0.00164605
Tspan9	109246	1.31131	0.00111536		Cdyl2	75796	-1.26827	0.00718229		Pvt1	19296	1.25436	0.00862621
Dpep2	319446	1.31013	0.00391687		Il2rb	16185	-1.26856	0.00639368		Abi2	329165	1.25358	0.00313321
Gm11710	100043123	1.30982	0.00626221		Gas2l1	78926	-1.27194	0.000540014		Phldb2	208177	1.25325	0.00562553
Zfp57	22715	1.30909	0.00729664		Narf	67608	-1.2742	0.000572588		Myadm	50918	1.25153	0.00412047
Jdp2	81703	1.30877	0.0096013		Ptprr	19279	-1.27514	0.00228735		Fkbp4	14228	1.24902	4.33435e-05
Pvt1	19296	1.30851	0.00201328		Ccng2	12452	-1.27921	0.0027161		Serp1	28146	1.24743	0.00353379
Tgfbr2	21813	1.30816	6.75981e-06		Fbxl8	50788	-1.28294	0.0001182		Itpr1	16438	1.24694	0.0035927
Palmd	114301	1.30816	0.00928463		Ceacam20	71601	-1.28381	0.00122361		Tcf4	21413	1.24633	0.00228776
Tcf4	21413	1.30754	0.000251516		42432	320253	-1.28505	0.00690401		Mmp23	26561	1.24593	0.00158991
Ifnar2	15976	1.30746	0.00933434		Upk1a	109637	-1.28822	0.00601683		Ttc12	235330	1.24552	0.00933285
Cfp	18636	1.3074	0.00526323		Cd274	60533	-1.29264	0.00690192		Colgalt2	269132	1.24511	0.00578651
Dennd2a	209773	1.3069	0.000453948		Slc25a2	83885	-1.30499	0.00515006		Arhgap31	12549	1.24288	0.00225879
Rusc2	100213	1.30578	0.00884697		Ap5s1	69596	-1.30526	0.000174494		Taf9b	407786	1.24281	0.00277329
Snora16a	100310813	1.30549	2.67516e-05		Gm5617	434402	-1.30685	3.6536e-05		Lipt2	67164	1.24269	0.00940474
Adcy3	104111	1.30544	0.00269318		Heca	380629	-1.31209	0.000752182		Slc25a45	107375	1.24197	0.00333943
Mtap7d3	320923	1.3052	8.3705e-05		Shisa2	219134	-1.31531	0.00367927		Maged1	94275	1.24043	0.00270332
2700081O15Rik	108899	1.30502	0.00130481		Map2k3os	24082	-1.32	0.00860819		Glt8d1	76485	1.24015	0.00122062
Kirrel	170643	1.30462	0.00219068		Ovol1	18426	-1.32191	0.00498726		Nrg2	100042150	1.23943	0.00879635
Cntnap5a	636808	1.30356	0.00709755		Snx16	74718	-1.32231	0.000150491		Zc3h12c	244871	1.23867	0.00962743
4933411K16Rik	66765	1.30222	0.00394464		Abcc8	20927	-1.32317	0.0020001		Man1c1	230815	1.23699	0.00555032
Sema4c	20353	1.30217	0.000272446		Tsc22d4	78829	-1.32366	9.60679e-06		Ano6	105722	1.23613	0.000871079
Rgs6	50779	1.30042	0.000405989		Mov10	17454	-1.32773	0.00988668		Siglec1	20612	1.23553	0.00748305
Nova1	664883	1.30008	0.00410463		Pik3r5	320207	-1.3285	0.00172398		Abce1	24015	1.23347	0.00611844
Cntln	338349	1.29857	0.000155891		Mroh8	629499	-1.33005	0.0094203		Tmem123	71929	1.23326	0.00296496
Pde4b	18578	1.29844	0.00833215		Fam46a	212943	-1.33088	0.000212004		Dpysl2	12934	1.23315	0.000389771
Myo1f	17916	1.29792	0.0061281		Avil	11567	-1.3326	0.00113189		Enpp1	18605	1.23212	0.0029799
Ache	11423	1.29692	0.00119669		Siglec5	233186	-1.33318	0.00615887		Pear1	73182	1.23141	0.0068319
Slc30a2	230810	1.29674	0.00160984		Ppp1r3b	244416	-1.33882	0.000914743		Cpt1c	78070	1.23125	0.00882475
Itgam	16409	1.29459	0.0038786		P2ry4	57385	-1.33992	0.00566797		Tenc1	209039	1.22988	0.00254624
Rsu1	20163	1.29311	0.00019901		Dlk1	13386	-1.34653	0.0017141		Pcdh12	53601	1.22979	0.00518909
Aff2	14266	1.29265	0.00561115		Dclk1	13175	-1.34944	0.00246867		Dnajc10	66861	1.22863	0.00859744
Myh10	77579	1.29225	0.00345256		Irs2	384783	-1.3499	0.00812907		Tgfbr2	21813	1.22759	0.00029827
Dmxl2	235380	1.29178	0.00185959		Gm16401	100041413	-1.35032	0.00468887		Ptp4a3	19245	1.22711	0.00172569
Colgalt2	269132	1.29107	0.00137866		Nrgn	64011	-1.35096	0.000878676		Slc39a6	106957	1.22594	0.00116839
Chrnb1	11443	1.28958	0.00508471		Sectm1b	58210	-1.35241	0.000485467		Rcbtb2	105670	1.22571	0.00143398
Nab2	17937	1.28921	0.00886499		Klrd1	16643	-1.35282	0.00944653		Scarf2	224024	1.22239	0.00302338
Gipc3	209047	1.28826	0.00331082		Il15	16168	-1.35306	0.00946303		Fut10	171167	1.22188	0.00365102
Atp8b2	54667	1.28819	0.00205046		Nags	217214	-1.36007	0.00258857		Ostc	66357	1.22123	0.00192404
Hectd2	226098	1.28809	0.00547337		Sec14l4	103655	-1.36232	0.00870225		Pkd2	18764	1.21985	0.00256668
Ramp3	56089	1.28754	0.00818684		Hnf4g	30942	-1.36718	0.000154892		Hdac7	56233	1.21772	0.000705822
Cacna1d	12289	1.28588	0.00330198		Psmb8	16913	-1.36799	0.00303426		Gabbr1	54393	1.21725	0.00856741
Olfm1	56177	1.28556	0.00599893		Kl	16591	-1.36843	0.000616827		Col27a1	373864	1.21673	0.00629232
Tmem123	71929	1.28465	0.00045157		Dusp5	240672	-1.36915	0.00297117		Fhl2	14200	1.21374	0.00503121
Gabbr1	54393	1.28448	0.000985881		Bcl6	12053	-1.37237	0.0012952		Fndc3b	72007	1.21069	0.00489612
Pitpnm2	19679	1.28396	0.00291858		Fzd5	14367	-1.37476	0.000284121		Epb4.1l2	13822	1.20807	0.00374091
Arhgef10	234094	1.2835	0.00534701		Gm11696	100036768	-1.37517	0.000940871		Arrb2	216869	1.20639	0.0057524
Rcbtb2	105670	1.2829	0.000131093		Cited2	17684	-1.37567	0.00434598		Sec13	110379	1.20558	0.00751535
Eln	13717	1.28215	0.00457962		Sytl5	236643	-1.37623	0.000529648		Rny3	19874	1.20533	0.00718113
Gas7	14457	1.28176	0.000158238		Slurp1	57277	-1.3788	0.000830464		Rsu1	20163	1.20438	0.00545992
Sfmbt2	353282	1.28123	0.00704761		Armcx6	278097	-1.38158	0.00339102		Isg20	57444	1.20393	0.0013205
Rufy2	70432	1.27844	0.00817011		Tpbg	21983	-1.38555	0.00135881		Dach1	13134	1.20327	0.00192404
Vav1	22324	1.27802	0.00695134		Fbxo32	67731	-1.38812	0.00372393		Cntln	338349	1.20314	0.00552978
Snord33	27208	1.27742	0.00550128		Alox5	11689	-1.39261	0.00151355		Gramd1a	52857	1.2024	0.0063008
Tspyl2	52808	1.27535	0.00102445		Dthd1	100322896	-1.39309	0.00681114		Cst3	13010	1.20098	0.000188348
Ccdc141	545428	1.2749	0.00268915		4930539E08Rik	207819	-1.39444	0.000464126		Arl1	104303	1.20092	0.00184916
Col5a1	12831	1.27441	0.000316017		Pou2f3	18988	-1.39784	0.000393157		Rpl36al	66483	1.20079	0.00333705
Soat2	223920	1.27296	0.00570962		Kcnj2	16518	-1.40094	0.000660951		Stip1	20867	1.19986	0.00971558
Ufsp1	70240	1.27289	0.000132953		4930599N23Rik	75379	-1.41084	0.00372393		Ufsp1	70240	1.19728	0.00324327
Nfix	18032	1.27187	2.04182e-05		Pyy	217212	-1.42184	0.00127381		Nudc	18221	1.1949	0.0007712
Sh3bp1	20401	1.27177	0.00137827		Mir107	723826	-1.42604	0.000651007		Ifitm2	80876	1.19261	0.003459
Sh3bp5	24056	1.26978	0.00759762		1810046K07Rik	69809	-1.42813	0.000674119		Aars	234734	1.19135	0.00555301
Dnajc18	76594	1.2674	0.0088338		2610524H06Rik	330173	-1.42814	0.00938167		Patz1	56218	1.1898	0.00275004
Smarcd3	66993	1.26662	0.00567149		Ccdc92	215707	-1.42963	0.0047034		Eif2b4	13667	1.18912	0.00417336
Grk5	14773	1.26643	0.000588185		Tppp	72948	-1.4413	0.00162716		Hpse	15442	1.18806	0.00137123
Glis2	83396	1.26563	0.00109566		Mir30a	387225	-1.44541	0.00839267		Tmem165	21982	1.1869	0.000248871
Il6st	16195	1.26531	0.00782302		Vill	22351	-1.44962	0.0057066		Pdia4	12304	1.18565	0.00305266
Enpp1	18605	1.26287	0.000921199		H2-K2	630499	-1.45288	0.000190491		Tmem39a	67846	1.18478	0.00334333
Plcb1	18795	1.26278	0.00707152		Mir200a	387242	-1.45289	0.00661971		Mitf	17342	1.18173	0.00715529
Notch4	18132	1.2587	0.00716599		Rab11b	19326	-1.46071	0.00115575		Mrpl15	27395	1.18023	0.00645504
Zfp423	94187	1.25867	0.00572219		Themis3	74556	-1.46275	0.00108475		Fzd1	14362	1.1801	0.00621469
Rbms1	56878	1.25843	0.000583389		Pcsk1n	30052	-1.47031	0.00153893		Xbp1	22433	1.17863	0.00300775
Arhgap31	12549	1.25636	0.00123283		Zfp605	675812	-1.4725	0.00352566		Ikbip	67454	1.17862	0.00983835
Creb3	12913	1.25547	0.0006335		Ubtd2	327900	-1.47294	5.31344e-06		Syngap1	240057	1.17631	0.00886285
Tbx1	21380	1.25346	0.00430786		Npas2	18143	-1.47486	0.000992802		Nudt22	68323	1.17595	0.00867024
Tfpi	21788	1.25336	0.0030612		Kremen2	73016	-1.47788	1.76035e-05		Fkbp2	14227	1.17183	0.00658537
Exoc3l2	74463	1.25306	0.00695134		Gpr17	574402	-1.49237	0.00144157		Guk1	14923	1.16432	0.00217001
Twsg1	65960	1.25129	8.11195e-06		Mir30e	723836	-1.49679	0.00498726		Dnlz	52838	1.16005	0.000281592
Map7d1	245877	1.25095	0.00355635		Apol9b	71898	-1.50436	0.00457219		Arfip2	76932	1.15872	0.004494
Pear1	73182	1.24971	0.00374231		Sh2d6	71130	-1.50641	2.22961e-05		Ssr2	66256	1.15787	0.007015
Il6ra	16194	1.24872	0.00629302		Trpm5	56843	-1.50928	0.00322825		Cstf2	108062	1.1573	0.0034948
Gramd1a	52857	1.24783	0.00116225		Ctsw	13041	-1.51958	0.00481889		Exosc10	50912	1.15538	0.00551271
Cd81	12520	1.24766	0.007039		Asb11	68854	-1.53343	0.00393491		Slc50a1	19729	1.15515	0.00918219
Clps	109791	1.24514	0.00962282		2010002M12Rik	112419	-1.5336	0.00542352		Ift20	55978	1.15006	0.00141006
Hpse	15442	1.2449	7.54173e-05		Resp18	19711	-1.53649	0.00288163		Dnajc3	100037258	1.14646	0.00834415
Vat1	26949	1.24332	0.0027583		Sh2d7	244885	-1.54217	0.000728628		Ost4	67695	1.13952	0.000770958
Nfic	18029	1.24307	0.00201328		Ptprn	19275	-1.54266	0.00126316		Galnt2	108148	1.13562	0.00575881
Emid1	140703	1.24127	0.00482646		Sectm1a	209588	-1.55373	0.00145085		Spcs3	76687	1.13492	0.0075479
Dach1	13134	1.24108	0.00033432		Zfp783	232785	-1.57402	0.00055249		Hdlbp	110611	1.13448	0.000255859
Dync2li1	213575	1.24072	0.00960508		Zbp1	58203	-1.57904	0.00126316		Nedd4	17999	1.13382	0.0046578
Jade2	76901	1.23992	0.00735943		Cyp2d9	13105	-1.57932	0.00722267		Lrrk1	233328	1.13377	0.00987836
Efcc1	58229	1.23736	8.29221e-05		Abcg1	11307	-1.58599	6.47366e-06		Uggt1	320011	1.12894	0.00571156
Dtx4	207521	1.23719	0.00183772		Nrn1	68404	-1.58749	0.000120912		Tln1	21894	1.1285	0.00944356
Abi2	329165	1.23567	0.00500495		Frmd3	242506	-1.59501	0.00118666		Tmem214	68796	1.1259	0.00235405
Gab3	210710	1.23528	0.00602699		Mir429	723865	-1.59992	0.00677668		Utrn	22288	1.12281	0.00957128
Pls3	102866	1.23474	0.00384827		Ddx60	234311	-1.59993	0.00646476		P4hb	18453	1.12126	0.00363323
Fam214a	235493	1.23346	0.00304744		Tmem140	68487	-1.60139	7.43075e-05		Actn1	109711	1.11851	0.00825125
Adamts12	239337	1.22968	0.00151092		Hist2h3c1	15077	-1.61233	0.00263234		Prkar1a	19084	1.11676	0.00448026
Ntng2	171171	1.22746	0.0056477		Spats2l	67198	-1.61489	1.12255e-05		Lman2	66890	1.11658	0.00437944
Trim35	66854	1.22665	0.00932487		Krt84	16680	-1.61645	0.000516544		Tram1	72265	1.11524	0.00683837
Il1r1	16177	1.22399	0.00947224		Gcnt1	14537	-1.62055	0.00733613		Naa38	78304	1.11134	0.00930328
Lamb2	16779	1.22175	0.00704984		Olfr560	259117	-1.62687	0.0082709		Nisch	64652	1.1072	0.00250266
Acadsb	66885	1.22174	0.00142532		Olfr1368	258527	-1.63821	0.00023654		Yipf5	67180	1.09706	0.00796272
Cyth3	19159	1.21912	0.000722732		Ifit1	15957	-1.64546	0.00201477		Hspa8	15481	1.09257	0.00702158
Pea15a	18611	1.21787	0.00219299		Scnn1b	20277	-1.6741	0.0074689		Gpa33	59290	-1.08102	0.00547634
Itgb5	16419	1.21682	0.00599723		Pex5l	58869	-1.68504	4.98671e-06		Ctnna1	12385	-1.08483	0.00773349
Klhl5	71778	1.21641	0.00593036		Map10	74393	-1.68823	7.24576e-06		Abi1	11308	-1.09589	0.00149309
Fzd1	14362	1.21415	0.00143411		Fam154a	75811	-1.70709	0.00690192		Rnf38	73469	-1.09864	0.0049289
Patz1	56218	1.21207	0.000925154		Oasl2	23962	-1.71246	0.00274895		Myo6	17920	-1.09955	0.00562569
Arhgap22	239027	1.21029	0.00402903		Cd7	12516	-1.71329	0.00670299		Bach1	12013	-1.09987	0.00759132
Ldlrad4	52662	1.20977	0.00485949		Scg3	20255	-1.73027	4.81407e-06		Plxnb2	140570	-1.10077	0.00374091
Cfap69	207686	1.20899	0.00547337		Ak4	11639	-1.74703	0.00151741		Cux1	13047	-1.10282	0.00955782
Flt3l	14256	1.2082	0.0088338		2210407C18Rik	78354	-1.85712	0.0011857		C77080	97130	-1.1041	0.00630412
Ikbip	67454	1.20636	0.00340791		Klra6	16637	-1.86952	0.000367939		Psen1	19164	-1.10607	0.0020255
Far2	330450	1.20241	0.00881088		Edn1	13614	-1.88167	0.00121358		Stx7	53331	-1.10743	0.00985102
Hdac7	56233	1.20046	0.00126392		Zfp37	22696	-1.88366	4.46205e-06		Slc44a4	70129	-1.10815	0.00298424
Dync2h1	110350	1.19864	0.00909782		Oas3	246727	-1.91687	0.00104865		Ppp3ca	19055	-1.11084	0.00759132
Ttl	69737	1.19477	0.0038992		Peg3	18616	-1.97021	0.00095974		Pef1	67898	-1.11231	0.00349113
BC030336	233812	1.1939	0.00380367		Ppp3r2	19059	-1.97865	5.89902e-05		Elmo3	234683	-1.11325	0.00828222
Cep112	76380	1.19387	0.00685922		2310079G19Rik	69699	-2.00498	0.00511091		Car4	12351	-1.11338	0.00236361
Snord49b	100217426	1.19042	0.00276905		Ido1	15930	-2.11868	1.60296e-05		Nelfb	58202	-1.11513	0.00357729
Map3k12	26404	1.19036	0.00576047		Gbp2	14469	-2.14028	0.00413524		Smg1	233789	-1.11645	0.00062842
Arl1	104303	1.18482	0.00330367		Rps4l	66184	-2.14132	9.0661e-09		Clk4	12750	-1.11808	0.0088577
Epn2	13855	1.18392	0.00898713		Cadps	27062	-2.22442	3.2694e-06		Csnk1g3	70425	-1.1202	0.00977802
Impact	16210	1.18267	0.00165848		Grin3a	242443	-2.6051	0.000802184		Lcor	212391	-1.12079	0.00694495
Sntb2	20650	1.18173	0.00317517							Ikbkg	16151	-1.1217	0.00997741
Itgb1	16412	1.18109	0.004106							Plekha6	240753	-1.12187	0.00940916
Fam65a	75687	1.18099	0.00278065							Abhd17c	70178	-1.12206	0.00884364
Rasa3	19414	1.1804	0.00742321							Dhx32	101437	-1.12346	0.000770987
Ugt2b35	243085	1.17999	0.00393032							Hivep1	110521	-1.12438	0.00951576
Alg6	320438	1.17721	0.00599723							Usb1	101985	-1.12521	0.00652965
Rmrp	19782	1.17642	0.00540207							1110032A03Rik	68721	-1.12576	0.00562569
Peak1	244895	1.17572	0.000696183							Usp3	235441	-1.12638	0.00518139
2410002F23Rik	668661	1.17337	0.00182117							Med15	94112	-1.12702	0.00154201
Phf20	228829	1.17331	0.00922201							Vdr	22337	-1.12773	0.00820273
Anxa5	11747	1.17297	0.00460235							Yes1	22612	-1.12928	0.00859744
Trim3	55992	1.17182	0.00759702							Pip5k1b	18719	-1.12982	0.00819071
Bnip2	12175	1.17047	0.00229644							Ubl7	69459	-1.13081	0.000696415
Plcg1	18803	1.16835	0.000799605							Stap2	106766	-1.13084	0.000958582
Ptbp2	56195	1.16748	0.00719151							Sc5d	235293	-1.13163	0.00248756
Snora7a	100217451	1.16722	0.00863641							Wasl	73178	-1.13171	0.00389188
Tmem5	216395	1.16442	0.00261295							Ncstn	59287	-1.13199	0.000558813
Csde1	229663	1.16323	0.00198438							Tmem45b	235135	-1.13201	0.0040289
Tnip2	231130	1.1632	0.00384964							Pfkfb2	18640	-1.13309	0.00930328
Utrn	22288	1.15863	0.0011945							Serpinb6a	20719	-1.13401	0.0020818
Dph7	67228	1.15601	0.00963414							Strn	268980	-1.13436	0.00630363
Galnt2	108148	1.15445	0.00187805							Upf2	326622	-1.13501	0.00722297
Nedd4	17999	1.1537	0.00131945							Specc1	432572	-1.13544	0.00451795
Myo9a	270163	1.15216	0.00509052							Lrp6	16974	-1.13607	0.000916811
Mbnl1	56758	1.13611	0.00389931							Mesdc1	80889	-1.13615	0.00816959
Tln1	21894	1.13287	0.0072429							Mapk13	26415	-1.13706	0.00979714
Acat1	110446	1.13282	0.00397226							Sltm	66660	-1.13762	0.00115461
Actn1	109711	1.12005	0.00719151							Mllt4	17356	-1.13868	0.00147754
Zfp346	26919	1.11664	0.00863641							Tspan1	66805	-1.13966	0.00503121
Prkar1a	19084	1.1089	0.00704761							Mfn1	67414	-1.14113	0.0015453
Dnlz	52838	1.10632	0.0088338							Vps72	21427	-1.14268	0.00454658
Osbpl9	100273	1.09475	0.00572219							Bcl2l14	66813	-1.14293	0.00689357
Clint1	216705	-1.08605	0.00886678							Ndfip2	76273	-1.14331	0.00221326
Psen1	19164	-1.08628	0.00907774							Pigs	276846	-1.1436	0.00309323
Ppil2	66053	-1.08831	0.00582401							Herpud2	80517	-1.14397	0.00275004
Dhx32	101437	-1.09219	0.00782168							Tor1aip2	240832	-1.14436	0.00326079
Cox8a	12868	-1.09359	0.00599723							Aff1	17355	-1.14576	0.00389188
Smg1	233789	-1.09365	0.00390699							Slk	20874	-1.14613	0.00138214
Rnf38	73469	-1.09925	0.00435827							Gtpbp2	56055	-1.14655	0.00674078
Trappc9	76510	-1.10036	0.00709755							Ssx2ip	99167	-1.14657	0.00485172
Eif4e2	26987	-1.10229	0.00784495							Mtmr6	219135	-1.14682	0.00212989
Kdm4a	230674	-1.10367	0.00988698							Inadl	12695	-1.14695	0.00417671
Slc25a39	68066	-1.10502	0.00216241							Mef2d	17261	-1.14757	0.0030907
Mllt4	17356	-1.10837	0.00921244							Rab3ip	216363	-1.14784	0.00250589
Gga1	106039	-1.10951	0.00928501							Parp16	214424	-1.14859	0.00722297
Tmem129	68366	-1.10965	0.00972533							Mtfr1	67472	-1.14903	0.00518063
Capzb	12345	-1.11347	0.0043805							Tjp1	21872	-1.14908	0.00722592
Slc15a4	100561	-1.1135	0.00555609							Irf6	54139	-1.14911	0.00081619
Med15	94112	-1.11487	0.0032989							Xrn1	24127	-1.15091	0.00967464
Klhdc3	71765	-1.1149	0.00890443							Taf4a	228980	-1.15105	0.00100211
Trp53inp2	68728	-1.118	0.00582401							Nhlrc2	66866	-1.15358	0.0042743
Myl12b	67938	-1.11911	0.00734203							Osbpl5	79196	-1.15373	0.00850344
Hmg20b	15353	-1.12175	0.00954884							Clrn3	212070	-1.15415	0.0028783
Trim24	21848	-1.12217	0.00912183							Dok4	114255	-1.15485	0.00392111
Ccdc6	76551	-1.12233	0.00551602							Ptpn3	545622	-1.15514	0.00445301
Ubl7	69459	-1.12237	0.00111536							2310061I04Rik	69662	-1.15565	0.00374202
Nhsl1	215819	-1.12317	0.0034926							Etl4	208618	-1.15611	0.00545412
Ppp1r11	76497	-1.12366	0.0087392							Acad11	102632	-1.15708	0.00278268
Smim11	68936	-1.1254	0.00386335							Tax1bp1	52440	-1.15721	0.00623421
Tff3	21786	-1.12615	0.00402551							Itfg3	106581	-1.15762	0.00483112
B4galt3	57370	-1.1273	0.00384964							Tmem245	242474	-1.15886	0.00222328
Csnk2b	13001	-1.12899	0.00212251							Zfp7	223669	-1.15897	0.00281276
Otud5	54644	-1.12922	0.00321961							Tbc1d14	100855	-1.15943	0.00434039
Slc44a4	70129	-1.12972	0.000484193							Arhgef16	230972	-1.15994	0.00595732
Hgs	15239	-1.13001	0.00166016							Smpdl3a	57319	-1.15998	0.00192404
Arrdc1	215705	-1.13102	0.00120674							Nub1	53312	-1.16021	0.00423583
Mef2d	17261	-1.13141	0.00692259							Lsm14b	241846	-1.16031	0.00820273
Grn	14824	-1.13279	0.00547359							Inpp5k	19062	-1.16045	0.00691633
Stap2	106766	-1.13298	0.000682448							Mst1r	19882	-1.16089	0.00881931
Tex2	21763	-1.13315	0.0072429							Dusp18	75219	-1.16154	0.00586549
Smdt1	69029	-1.13412	0.0012476							Spint2	20733	-1.1618	0.00240969
Car4	12351	-1.13416	0.000405989							Arrdc1	215705	-1.16217	0.000159833
Tspan31	67125	-1.13558	0.00250328							Mark2	13728	-1.16264	0.000450098
Lcor	212391	-1.13566	0.00266887							Nhsl1	215819	-1.16274	0.000297501
Irf6	54139	-1.13574	0.00165586							Cbl	12402	-1.16295	0.00318319
Rnf214	235315	-1.13653	0.00769845							Synj1	104015	-1.16429	0.00833285
Rab25	53868	-1.13763	0.000855683							Shroom3	27428	-1.16444	0.000249534
Tpra1	24100	-1.13829	0.0077385							Cldn3	12739	-1.16455	0.00260139
Klf3	16599	-1.14002	0.0021257							Tmem106a	217203	-1.16498	0.00888465
Rhog	56212	-1.14032	0.00408929							Naprt	223646	-1.1657	0.00836518
Brd3	67382	-1.14131	0.00408062							Hectd3	76608	-1.16575	0.00470471
Mlxip	208104	-1.1432	0.00821485							Pias2	17344	-1.16588	0.00829334
2310061I04Rik	69662	-1.14407	0.00617595							Hnf1b	21410	-1.16641	0.00791028
Mboat7	77582	-1.14415	0.00569047							Rlf	109263	-1.16712	0.0028783
Smagp	207818	-1.14475	0.0099684							Smad1	17125	-1.16754	0.0034948
Msrb1	27361	-1.14583	0.00211991							Slc35f5	74150	-1.16825	0.00318894
Sema4a	20351	-1.14655	0.00167378							Tgif1	21815	-1.16834	0.00629879
Cldn3	12739	-1.14851	0.00529471							Lgr4	107515	-1.1688	0.00957973
Pglyrp1	21946	-1.14921	0.00742843							Tmem63b	224807	-1.16891	0.00126297
Pqbp1	54633	-1.15093	0.00105036							Efnb2	13642	-1.16933	0.00321678
Agpat1	55979	-1.15146	0.00521704							Ccndbp1	17151	-1.17104	0.00222358
Tnk1	83813	-1.15223	0.004106							Commd7	99311	-1.17232	0.000194022
Rnasel	24014	-1.15277	0.0096162							Arhgap17	70497	-1.17278	0.00365102
Lrp6	16974	-1.15351	0.000218568							Mpp5	56217	-1.17283	0.00282262
Itpkc	233011	-1.15381	0.0099684							Mark4	232944	-1.17304	0.00895198
Grina	66168	-1.15416	0.00761445							Parp6	67287	-1.17318	0.00245964
Asap2	211914	-1.1544	0.00854091							Rictor	78757	-1.17351	0.00150063
Spire2	234857	-1.15506	0.00151092							Tapbpl	213233	-1.17369	0.0032262
Prdm10	382066	-1.1551	0.00240203							E2f5	13559	-1.17371	0.0016898
Fbrs	14123	-1.1551	0.00842788							2900026A02Rik	243219	-1.17375	0.00632546
Mpp5	56217	-1.15532	0.00583923							Tbc1d32	544696	-1.17436	0.00964005
Lrrc1	214345	-1.15545	0.00494088							Lmo4	16911	-1.17444	0.00732695
Rbm14	56275	-1.15599	0.0083817							Ulk1	22241	-1.17473	0.00184926
Taf4a	228980	-1.15599	0.000618261							Acy3	71670	-1.17586	0.000377928
Liph	239759	-1.15674	0.00886678							Casz1	69743	-1.17602	0.00518909
Ctdsp2	52468	-1.15683	0.00543901							Klf4	16600	-1.17658	0.00967464
Ralgps2	78255	-1.15715	0.00539649							4930579K19Rik	75881	-1.17672	0.00768176
Vps33b	233405	-1.15747	0.00723971							Chmp1a	234852	-1.17674	0.00464525
Foxd2	17301	-1.15814	0.00637409							Entpd2	12496	-1.17716	0.00194293
Mark2	13728	-1.15815	0.000487253							Fggy	75578	-1.17742	0.00623421
Tor1aip2	240832	-1.15874	0.00129011							Dsg2	13511	-1.17814	0.00148689
Acad11	102632	-1.16085	0.00206044							Peli1	67245	-1.17839	0.00730872
St14	19143	-1.16101	0.0024589							Tlr1	21897	-1.17841	0.00184916
Ssx2ip	99167	-1.16109	0.00209731							Tnk1	83813	-1.17842	0.00122914
Alkbh7	66400	-1.16182	0.00954732							Sult1b1	56362	-1.17852	0.00987836
Spint2	20733	-1.16288	0.00201574							Pcdh1	75599	-1.17867	0.00799419
Psmf1	228769	-1.16305	0.00325007							Slc6a14	56774	-1.17889	0.00344603
Tcf7l2	21416	-1.16394	0.0012476							Rit1	19769	-1.17963	0.00591644
Zfp160	224585	-1.16414	0.00706711							Rfxank	19727	-1.18004	0.0042101
Ctsl	13039	-1.16467	0.00985008							Tcf7l2	21416	-1.18038	0.000603411
Vamp8	22320	-1.16475	0.00219803							B4galt3	57370	-1.18056	0.000157659
Rnf31	268749	-1.16508	0.00117775							Pex5	19305	-1.18074	0.00967748
Pllp	67801	-1.16522	0.00437561							Rilp	280408	-1.18083	0.00522388
Cwf19l1	72502	-1.16527	0.00804426							Tmbim1	69660	-1.18132	0.00263069
Rab3ip	216363	-1.16623	0.000751781							Gm5617	434402	-1.18282	0.00496555
Rfxank	19727	-1.16713	0.00675285							Prickle3	54630	-1.18325	0.00445391
Mafk	17135	-1.16719	0.00665128							Lmbr1l	74775	-1.18486	0.00493009
2210016F16Rik	70153	-1.16732	0.00855112							Zfp628	232816	-1.1851	0.00302338
Lmo4	16911	-1.16844	0.00881766							Nr3c2	110784	-1.18518	0.00356751
Leprotl1	68192	-1.16846	0.00193008							Casp7	12369	-1.18519	0.00249484
Kctd13	233877	-1.16866	0.00435827							Sertad2	58172	-1.18525	0.00125655
Tctn2	67978	-1.16876	0.00648208							Btf3l4	70533	-1.18583	0.00547634
Ipmk	69718	-1.16882	0.00309448							Erlin1	226144	-1.18595	0.00853485
Tas1r3	83771	-1.16923	0.00979061							Sema3c	20348	-1.18596	0.00658537
Zfp87	170763	-1.16979	0.00515487							Ube2r2	67615	-1.18635	0.00115179
Rab27a	11891	-1.17051	0.00124995							Uhrf1bp1l	75089	-1.18676	0.00459151
Shroom3	27428	-1.17076	0.000131268							4933426M11Rik	217684	-1.18744	0.00214383
Cbx2	12416	-1.17115	0.00730787							Ugcg	22234	-1.18754	0.00132257
Eif4ebp3	108112	-1.17129	0.00181982							Clmn	94040	-1.18791	0.0029103
Arhgap33	233071	-1.17131	0.00959259							Btnl4	632126	-1.18802	0.00989025
Sertad2	58172	-1.17139	0.00217462							Fgd4	224014	-1.1887	0.00323227
Pfkfb2	18640	-1.17312	0.00108758							Mtf1	17764	-1.18922	0.00988558
Ube2l3	22195	-1.17315	0.00304744							Ptprh	545902	-1.18934	0.00989025
Trim16	94092	-1.17433	0.00908809							Ppp1r10	52040	-1.18944	0.00712087
Acy3	71670	-1.17434	0.000336164							Tbk1	56480	-1.18948	0.00157387
Slc6a14	56774	-1.17462	0.00384052							Mafk	17135	-1.18977	0.00277466
Nlrp6	101613	-1.17477	0.000717824							Asap2	211914	-1.19002	0.00194946
Tmem180	75146	-1.17612	0.00104202							Pold4	69745	-1.19006	0.00354112
Peli1	67245	-1.17628	0.00751083							Tpcn1	252972	-1.19033	0.00964005
Pigf	18701	-1.17659	0.00741392							Sash1	70097	-1.19122	0.0078167
Dusp18	75219	-1.17668	0.0027583							Cebpa	12606	-1.19199	0.0081276
Psmb2	26445	-1.17669	0.0017674							Marveld2	218518	-1.19321	0.00259747
Idnk	75731	-1.17736	0.000319473							Sema4a	20351	-1.19469	0.000111448
Cblc	80794	-1.1778	0.000145677							Pcgf2	22658	-1.1953	0.00534819
Commd7	99311	-1.178	0.000109052							Pdgfa	18590	-1.19571	0.0042101
Tspan1	66805	-1.17914	0.000511278							Styxl1	76571	-1.19609	0.00483112
Max	17187	-1.1798	0.0072799							Tmem236	625286	-1.19623	0.00561095
Marveld2	218518	-1.18038	0.00402903							Pnrc1	108767	-1.19631	0.00522388
Zfp628	232816	-1.18049	0.00340791							AI837181	107242	-1.19661	0.00368292
Shisa5	66940	-1.181	0.000616935							Fbxo33	70611	-1.19663	0.00664259
Fbxl8	50788	-1.1814	0.0055847							Thsd4	207596	-1.19768	0.00127771
Pdlim1	54132	-1.18195	0.000313861							Tas1r3	83771	-1.19826	0.003459
Slc31a2	20530	-1.18213	0.00552913							Insr	16337	-1.19944	0.00333943
Diap1	13367	-1.1831	0.00503373							Mxd1	17119	-1.19988	0.00122062
Zbtb43	71834	-1.1846	0.00432501							Rnf31	268749	-1.20109	0.000192537
Hist1h2bc	68024	-1.18478	0.00133161							Arhgap18	73910	-1.20124	0.00656909
Pigh	110417	-1.18523	0.00335611							Lnx1	16924	-1.20196	0.00943491
Tmem236	625286	-1.18569	0.00769967							Cnppd1	69171	-1.20298	0.000157663
Zswim5	74464	-1.18572	0.00762563							Zbtb43	71834	-1.20327	0.00226935
Pnpla2	66853	-1.18574	0.000823775							Uap1l1	227620	-1.20343	0.000998559
Plekha7	233765	-1.18658	0.00624114							Marveld3	73608	-1.20378	0.000568245
Tacc2	57752	-1.18688	0.00328626							Pllp	67801	-1.20433	0.00082764
Pla2g10	26565	-1.18711	0.00492389							Tdrd7	100121	-1.205	0.000997914
Sirt4	75387	-1.18773	0.00675285							Mpzl2	14012	-1.20633	0.00967464
Vps37c	107305	-1.18798	0.00730505							Frmd8	67457	-1.20707	0.00377076
Col20a1	73368	-1.18828	0.00269861							Fam110c	104943	-1.20728	0.00742973
Mier2	70427	-1.18879	0.00873033							Ipmk	69718	-1.20799	0.00055482
Tnip1	57783	-1.18905	0.00711775							Ptprj	19271	-1.20813	0.000520068
Zp2	22787	-1.18976	0.00582028							Avl9	78937	-1.20829	0.000711734
Ptprj	19271	-1.19124	0.000977949							Plekha7	233765	-1.20854	0.0029638
Mdp1	67881	-1.19124	0.00162276							Smad2	17126	-1.20962	0.000809033
Spns1	73658	-1.19156	0.00475169							Olfr412	258153	-1.20965	0.00442231
Mapk13	26415	-1.19215	0.00057492							Comp	12845	-1.20988	0.00284865
Zfp516	329003	-1.19259	0.00899105							Yipf4	67864	-1.20992	0.000270052
Dad1	13135	-1.1928	0.00397975							Gm527	217648	-1.21025	0.00861256
Cyb5d2	192986	-1.19406	0.00932487							Liph	239759	-1.21053	0.000968179
Rundc3a	51799	-1.19424	0.00528706							Cblc	80794	-1.21055	2.42136e-05
Pias3	229615	-1.19438	0.00749606							Ctdsp2	52468	-1.21067	0.000491492
Slc4a4	54403	-1.19447	0.00277299							G6b	106722	-1.21134	0.000557005
Vwa3b	70853	-1.19514	0.00848161							Itpkc	233011	-1.21184	0.000912035
Mst1r	19882	-1.19593	0.0018693							Adal	75894	-1.21212	0.00894309
Cnst	226744	-1.19646	0.00158525							Kat6b	54169	-1.2122	0.00323798
Zswim3	67538	-1.19929	0.00645793							Uevld	54122	-1.21261	0.00788434
Dclre1a	55947	-1.1995	0.00765092							Cish	12700	-1.21311	0.00598271
Hexim1	192231	-1.19962	0.00132491							Oxct1	67041	-1.2137	0.00134961
Wdyhv1	76773	-1.19983	0.0047746							Zbtb34	241311	-1.21404	0.00586843
Comp	12845	-1.1999	0.00383869							Trim25	217069	-1.21409	0.00233663
Zdhhc17	320150	-1.20009	0.00863641							Ocln	18260	-1.21476	0.00837377
Tbc1d25	209815	-1.20109	0.0032989							Mcl1	17210	-1.21513	0.00259747
Irf2bp1	272359	-1.20133	0.00616506							Tsc22d4	78829	-1.21549	0.000863708
Zbtb9	474156	-1.20146	0.00309448							Gpr119	236781	-1.21549	0.00919685
Lypd6	320343	-1.20158	0.00310824							Acd	497652	-1.21665	0.00444589
Irak2	108960	-1.20268	0.00707527							Tbc1d2	381605	-1.21803	0.00180112
Adora3	11542	-1.20331	0.00599723							Gas2l1	78926	-1.2183	0.00323798
Cpvl	71287	-1.20365	0.00348152							Gm13375	433408	-1.21863	0.00258927
Narf	67608	-1.20388	0.00556502							Slc25a20	57279	-1.21938	5.70512e-05
Krtap12-1	16694	-1.20434	0.00688861							Ak7	78801	-1.22003	0.00751535
Trim25	217069	-1.20436	0.00305937							Rfx6	320995	-1.22025	0.00845168
2900026A02Rik	243219	-1.20437	0.00162276							Ctss	13040	-1.22201	0.00712087
Specc1l	74392	-1.20492	0.00157419							Lamb3	16780	-1.22286	0.00573072
Mgst2	211666	-1.20501	0.00208576							Zfp395	380912	-1.22419	0.00763408
Clrn3	212070	-1.20527	0.000157525							Rhpn2	52428	-1.22459	0.000600116
Atp5k	11958	-1.2059	0.00393697							Zfyve1	217695	-1.22634	0.00382874
Dnajb1	81489	-1.20658	0.00778206							Rnf19b	75234	-1.2265	0.00205174
Mettl17	52535	-1.20693	0.00177968							Cnksr1	194231	-1.2272	4.0721e-05
Misp	78906	-1.20799	0.000207879							Atg14	100504663	-1.22777	0.00907674
Cnksr1	194231	-1.20829	8.95652e-05							Erbb3	13867	-1.22889	0.00109328
Zfp959	224893	-1.2083	0.00446216							Cx3cl1	20312	-1.22944	0.000621939
Cx3cl1	20312	-1.20928	0.00122644							Rhoc	11853	-1.22967	0.00860151
Gm3934	100042625	-1.20936	0.00661036							Smg6	103677	-1.2304	0.00118514
Syt14	329324	-1.21254	0.00582401							Mtm1	17772	-1.23108	0.00483112
Hcfc1r1	353502	-1.21277	0.00232858							Hist1h1t	107970	-1.23185	0.00253998
Gas2l1	78926	-1.21308	0.00360201							Ccdc28a	215814	-1.23187	0.00530634
Acd	497652	-1.21322	0.00463783							Tec	21682	-1.23222	0.00276694
Mxd1	17119	-1.21425	0.000539661							Sptbn4	80297	-1.23357	0.00748012
Tanc2	77097	-1.21453	0.00330367							Rffl	67338	-1.23445	0.00895198
Fbxo33	70611	-1.21458	0.0032989							Tacc2	57752	-1.23549	0.000488365
Ap5s1	69596	-1.21491	0.00352865							Vamp4	53330	-1.23576	0.00886285
Cbx4	12418	-1.2156	0.00645738							Nhlrc3	212114	-1.23742	0.00121913
Tgif1	21815	-1.21711	0.000682383							Wwp2	66894	-1.23753	0.000252335
Mall	228576	-1.21721	0.00442581							Lrrc61	243371	-1.23819	0.00966558
Proser2	227545	-1.21748	0.00912183							Kif13b	16554	-1.23841	0.00120999
1700008O03Rik	69349	-1.2175	0.00752241							Usp53	99526	-1.23868	0.00142262
Foxn3	71375	-1.2194	0.00259677							Tnip1	57783	-1.23945	0.00123653
Higd2a	67044	-1.22179	4.74074e-05							Pnpla2	66853	-1.23955	6.76144e-05
Mkrn1	54484	-1.2219	0.00289799							AA467197	433470	-1.23967	0.00231383
Znrd1	66136	-1.2219	0.00116795							Pdk2	18604	-1.24003	0.00713916
Snx16	74718	-1.22343	0.00352865							Caap1	67770	-1.24035	0.00258979
Trmt112	67674	-1.22433	0.00292447							Ccser1	232035	-1.2414	0.00258717
Foxo3	56484	-1.2252	0.00912183							Lhfpl2	218454	-1.24141	0.00216511
Tspan7	21912	-1.22597	0.000226456							Btn1a1	12231	-1.24205	0.00540053
Mcoln3	171166	-1.22702	0.00239704							Neu1	18010	-1.2428	0.00867024
Bloc1s3	232946	-1.22852	0.00023492							Kdm3a	104263	-1.24287	0.0022638
Fibp	58249	-1.23036	0.000126468							Apoc3	11814	-1.24404	0.00348375
Clec2d	93694	-1.23125	0.000637915							Adprm	66358	-1.24448	0.00858952
Ubl5	66177	-1.23231	0.000337286							Bfar	67118	-1.24463	0.000906528
Rfx6	320995	-1.23286	0.00551128							Crybb3	12962	-1.24507	0.00592722
Tsc22d4	78829	-1.23299	0.000333377							Slx4ip	74243	-1.24541	0.00261221
Smim20	66278	-1.23344	5.03025e-05							Zfp959	224893	-1.24579	0.00131298
Il12rb2	16162	-1.23363	0.00690753							Agpat4	68262	-1.24678	0.00116839
Cmc2	66531	-1.23693	0.00160036							Max	17187	-1.24699	0.000611939
AU016765	100043582	-1.23735	0.00636401							Irf2	16363	-1.24801	0.00262128
Ptprh	545902	-1.23744	0.0017531							1700010I14Rik	66931	-1.24845	0.00823036
Slc17a8	216227	-1.23771	0.00191619							Tspan7	21912	-1.24846	9.92396e-05
Rwdd2b	53858	-1.23781	0.000985881							Cdc14b	218294	-1.24883	0.00236361
Mir423	751519	-1.23963	0.0086925							3110001I22Rik	66598	-1.25046	0.0037875
Sptbn4	80297	-1.24228	0.00551602							Dclre1a	55947	-1.25138	0.00143628
Trim62	67525	-1.24237	0.0088338							Hcn2	15166	-1.25216	0.00856741
Chat	12647	-1.24241	0.00429012							Neurl1b	240055	-1.25249	0.00450326
Gm10536	100038410	-1.24307	0.00858305							Foxn3	71375	-1.25272	0.000882215
1700016K19Rik	74230	-1.2433	0.0079317							Eif2s2	67204	-1.25353	0.00908486
Slc6a3	13162	-1.24363	0.00613773							Lamc2	16782	-1.25623	0.00789381
Supt7l	72195	-1.24648	0.00172062							Ppfia3	76787	-1.25638	0.00439992
Morn2	378462	-1.24659	0.00601004							Eef2k	13631	-1.25666	0.00534036
Fam110c	104943	-1.24703	0.00184425							Kat2b	18519	-1.25696	7.14896e-05
Tmem39b	230770	-1.2478	0.000522941							Tex38	75173	-1.25729	0.00473278
Ddt	13202	-1.24837	0.00160984							Foxo3	56484	-1.2573	0.00389739
AW112010	107350	-1.24866	0.000336164							Btnl6	624681	-1.25813	0.00989025
Hist1h1t	107970	-1.24876	0.00122644							Zfp949	71640	-1.2603	0.00120999
Rpp21	67676	-1.2502	0.00439241							Atxn1	20238	-1.26092	0.00456598
Mir194-2	723957	-1.25138	0.0033064							Parp14	547253	-1.26155	0.00697636
Gstp1	14870	-1.25232	0.000158238							Erbb2	13866	-1.26304	0.00706453
Matk	17179	-1.25313	0.00930513							Mia2	338320	-1.26307	0.00389188
Serpinc1	11905	-1.25324	0.00302877							Nsun6	74455	-1.26314	0.00193019
Ttc22	230576	-1.25378	0.00825087							Vwa3b	70853	-1.26389	0.000897432
Khnyn	219094	-1.25386	0.00419543							Sh2d6	71130	-1.26402	0.00755839
Cutal	77996	-1.254	0.00861715							Gm15441	100038464	-1.26515	0.00651851
Tmcc3	319880	-1.25481	0.00748012							Lyrm9	66274	-1.26527	0.00829201
Parp12	243771	-1.25575	0.000350789							Pitpnm3	327958	-1.26548	0.00272154
Ptprr	19279	-1.2558	0.0033066							Irak2	108960	-1.26551	0.000930596
Tmem229a	319832	-1.25586	0.00558052							Sptbn2	20743	-1.26638	0.00538932
Ctns	83429	-1.25622	0.00520264							Fzd5	14367	-1.26805	0.00445217
Btn1a1	12231	-1.25625	0.00332003							Prss48	368202	-1.26936	0.00248756
Irf1	16362	-1.25642	0.00552402							Il22ra1	230828	-1.27074	0.00736729
Litaf	56722	-1.25677	0.00893678							Mir98	723947	-1.27084	0.00606302
Lck	16818	-1.25862	0.00192734							Acvr1c	269275	-1.27089	0.00562008
Klrb1a	17057	-1.25955	0.00212251							Trim16	94092	-1.27194	0.000240935
Srrd	70118	-1.26224	0.000135311							Tmem61	329909	-1.27248	0.00700331
Guca2b	14916	-1.26572	0.00520264							Clic5	224796	-1.27335	0.00295822
D1Ertd622e	52392	-1.26696	7.50977e-05							Bco2	170752	-1.27434	0.00676362
Olfr424	258716	-1.26707	0.00510326							Dcp1b	319618	-1.27457	0.00374202
Il2rb	16185	-1.26789	0.00509951							Cutal	77996	-1.27497	0.00539418
9530080O11Rik	319247	-1.26908	0.00386165							Ccdc68	381175	-1.27547	0.000713194
Hyls1	76832	-1.26941	0.00807965							Hnf4g	30942	-1.27676	0.0019989
Fgd6	13998	-1.26961	6.60431e-05							Chmp1b	67064	-1.2777	0.00124532
2310016G11Rik	69578	-1.26975	0.00932487							Pcsk4	18551	-1.27794	0.00659656
Gde1	56209	-1.27049	0.00374892							Parp12	243771	-1.28001	0.000167774
Trpv6	64177	-1.27221	0.00920491							Snx16	74718	-1.28094	0.000566922
Hcn2	15166	-1.27449	0.00456046							4921506M07Rik	70846	-1.28246	0.0018763
Olfr1417	258938	-1.27489	0.00238453							Reps2	194590	-1.28259	0.00535387
Shisa2	219134	-1.27535	0.00754874							Gypa	14934	-1.2837	0.00127839
Tmem74b	108832	-1.27585	0.00983268							Abca13	268379	-1.28497	0.00700331
Lsm2	27756	-1.27826	0.0055847							Osbpl1a	64291	-1.28562	0.0014767
Rplp2	67186	-1.27869	3.30974e-06							Mtmr11	194126	-1.28614	0.00342578
Gp9	54368	-1.28034	0.00771212							B630005N14Rik	101148	-1.28623	0.0027299
Apoc3	11814	-1.28048	0.000983206							Ifih1	71586	-1.28704	2.11343e-05
4921536K21Rik	67430	-1.28082	0.00707527							Ctns	83429	-1.2871	0.00245428
Adcy8	11514	-1.28089	0.000907711							Khnyn	219094	-1.28825	0.00173947
Hnf4g	30942	-1.28098	0.00154057							Shisa2	219134	-1.28887	0.00584579
Ttc36	192653	-1.28186	0.00898713							Ap5s1	69596	-1.2898	0.000278113
Syne4	233066	-1.28478	0.00805833							Mroh3	76422	-1.2908	0.00270144
Gm5148	381438	-1.28592	0.00825938							Sun3	194974	-1.29126	0.00222328
Chchd7	66433	-1.28809	8.44567e-06							Gsdmd	69146	-1.29463	5.93298e-05
Dmgdh	74129	-1.2882	0.00954732							St6gal2	240119	-1.29547	0.00304883
Ovol1	18426	-1.28833	0.00826373							Tesk2	230661	-1.29549	0.00245254
Prss48	368202	-1.28905	0.00120901							Gm15417	545539	-1.29645	0.00437031
Lhfpl2	218454	-1.28911	0.000353048							Fbxl8	50788	-1.29655	6.50597e-05
Tesk2	230661	-1.29108	0.00244996							Hyls1	76832	-1.29732	0.00443926
Pik3r5	320207	-1.2915	0.00364543							Fas	14102	-1.29844	0.00190996
Ccdc110	212392	-1.29172	0.00422935							Trim12c	319236	-1.29901	0.00909379
Fam19a3	329731	-1.29291	0.00262115							Plag1	56711	-1.29973	0.00820273
Wt1	22431	-1.29346	0.00582028							Nt5c3	107569	-1.2999	0.00992387
Ceacam20	71601	-1.2941	0.000697168							Kl	16591	-1.3006	0.00305141
Pou2f3	18988	-1.29413	0.00397975							Fam46a	212943	-1.30093	0.000507989
Slc25a2	83885	-1.29438	0.0052137							Ceacam20	71601	-1.30213	0.000658607
Proser3	333193	-1.29487	0.00308492							Mef2b	17259	-1.30536	0.00823036
Igf2bp2	319765	-1.29516	0.0035333							Nat2	17961	-1.30927	0.000868521
Tuft1	22156	-1.2955	0.00200409							Slc10a5	241877	-1.31035	0.00816959
Upk1a	109637	-1.29558	0.00391889							Gjb3	14620	-1.31141	0.00651851
Gm12500	791415	-1.29791	0.00867299							Thnsl2	232078	-1.31179	0.00990533
Fam69a	67266	-1.30186	0.00139357							Kcnh7	170738	-1.31197	0.00383668
Tube1	71924	-1.30417	0.00109566							Mkrn1	54484	-1.31247	0.000134943
Krtcap2	66059	-1.30417	0.00014225							Arhgap8	73167	-1.31695	0.000568245
Zdhhc25	70073	-1.30467	0.000533977							Olfr959	258501	-1.31699	0.00947024
Tmem150c	231503	-1.30588	0.00100231							Mir16-1	387134	-1.31801	0.00986523
Mir98	723947	-1.30842	0.0021257							Narf	67608	-1.32084	0.000104514
Hbb-bh2	436003	-1.30979	0.00224444							Nlrp10	244202	-1.32179	0.00621123
Tymp	72962	-1.31141	0.00963414							Fgd6	13998	-1.325	8.30439e-06
Ppp1r3b	244416	-1.315	0.00137827							Cyp2d34	223706	-1.32553	0.00621123
Mir106b	723925	-1.31797	0.00494876							Dnajc28	246738	-1.32617	0.00307604
Fxyd3	17178	-1.31816	0.000626562							Heca	380629	-1.3266	0.000468193
Fam46a	212943	-1.31837	0.000234765							Ablim2	231148	-1.33042	0.00614165
Mef2b	17259	-1.3188	0.00584886							Fam126a	84652	-1.33053	0.00528878
Gm11696	100036768	-1.32129	0.00277386							Kremen2	73016	-1.33055	0.000787996
Tpbg	21983	-1.32499	0.00420101							Tns4	217169	-1.33537	0.00518707
Mir375	723900	-1.32569	0.00304744							Abcg1	11307	-1.33552	0.00180149
Gm4925	237433	-1.32842	0.00396256							Mir107	723826	-1.33643	0.00389739
Btnl6	624681	-1.32871	0.00162276							Cd274	60533	-1.33796	0.00206941
Cdyl2	75796	-1.32995	0.00110255							Tm4sf20	66261	-1.33931	0.00623421
Tgm7	640543	-1.33176	0.00340852							Gramd1b	235283	-1.3395	0.000430728
Ccng2	12452	-1.33238	0.000453948							Ceacam18	72431	-1.34125	0.00377021
Gspt2	14853	-1.33274	0.00702378							Ptprr	19279	-1.34262	0.000286452
Kcnh7	170738	-1.33458	0.00206044							Irs2	384783	-1.34325	0.00765127
Rnasek	52898	-1.3385	0.000244945							Slco2a1	24059	-1.34506	0.000444171
Gfi1	14581	-1.34001	0.00992187							Pkhd1	241035	-1.34681	0.00278747
Chic2	74277	-1.34296	0.000122814							Micalcl	100504195	-1.3491	0.00122977
Mir148b	724064	-1.34431	0.000338477							Gm11696	100036768	-1.35196	0.00149641
1700123K08Rik	76658	-1.34553	0.00384964							Ces2f	71903	-1.35843	0.00976502
Bmp2	12156	-1.34604	0.00884137							Pcsk1n	30052	-1.3642	0.00836518
Ffar3	233080	-1.34611	0.000837186							Aldoc	11676	-1.36421	0.000291157
Gypa	14934	-1.34692	0.000154827							Ccng2	12452	-1.3643	0.00022406
Avil	11567	-1.347	0.000612663							Rhob	11852	-1.36487	0.00476494
Dusp5	240672	-1.34765	0.00374892							Sectm1b	58210	-1.365	0.000314559
Nags	217214	-1.35093	0.00252288							Dll1	13388	-1.3664	0.00933304
Sectm1b	58210	-1.35105	0.000377191							Acsl3	74205	-1.36886	0.00629879
Cd274	60533	-1.35112	0.00130481							Zfp37	22696	-1.3689	0.00947024
Nrgn	64011	-1.35305	0.000654776							Usp28	235323	-1.37003	0.000129881
Dclk1	13175	-1.35504	0.00172062							Tnni1	21952	-1.37035	0.00759132
Cables1	63955	-1.35632	0.00584886							Pex5l	58869	-1.37049	0.00219536
Ocm	18261	-1.35894	0.00383736							Slurp1	57277	-1.37112	0.00093914
Strip2	320609	-1.35897	0.00126398							Cables1	63955	-1.37471	0.00448026
4930599N23Rik	75379	-1.36022	0.0072671							Pdp2	382051	-1.37717	0.00680335
Siglec5	233186	-1.36172	0.00263582							Npas2	18143	-1.37795	0.00510444
Neurod1	18012	-1.36249	0.00125553							Htr1d	15552	-1.38171	0.0042703
Wdr83os	414077	-1.37081	0.00321701							Pcx	18563	-1.38672	0.00820273
Slurp1	57277	-1.37433	0.000727874							Sytl5	236643	-1.38772	0.000371691
Atp7b	11979	-1.37499	0.00482646							Rab33a	19337	-1.38925	0.00439485
Gpr64	237175	-1.37652	0.00920497							Dapp1	26377	-1.39293	0.00296389
Mroh8	629499	-1.37935	0.00283504							Pik3r3	18710	-1.39452	0.0027735
Gemin8	237221	-1.38029	0.00881766							Ppp1r3b	244416	-1.40058	0.000173012
Efna1	13636	-1.38232	0.000186956							Gpr17	574402	-1.40661	0.00528325
Ankdd1b	271144	-1.38525	0.0071127							Lce3a	545548	-1.40716	0.00858952
Ablim2	231148	-1.38598	0.00181124							Pmaip1	58801	-1.41228	0.00107635
Gm7257	639025	-1.38892	0.0027534							Herc6	67138	-1.41284	0.00672918
Kl	16591	-1.39159	0.000261339							Adam4	11498	-1.41409	0.00454078
Slc17a4	319848	-1.39284	0.00857758							Mir192	387187	-1.41432	0.00894474
Xcl1	16963	-1.3959	0.0082179							AA415398	433752	-1.41722	0.00135201
LOC102638986	102638986	-1.40327	0.000803119							Rasgef1b	320292	-1.42763	0.00281473
1810046K07Rik	69809	-1.40953	0.000782334							Sec14l4	103655	-1.42963	0.00231707
Mir107	723826	-1.40983	0.000705678							Zfp783	232785	-1.43296	0.00440954
2016-03-03	320253	-1.41027	0.000242594							Dthd1	100322896	-1.44004	0.00264685
Cpm	70574	-1.4156	0.000985881							Zbp1	58203	-1.4464	0.00712704
Psmb8	16913	-1.41593	0.000869246							Mov10	17454	-1.45132	0.000807333
Rimklb	108653	-1.42619	0.00293624							Il15	16168	-1.45575	0.00131287
Rasgef1b	320292	-1.42687	0.00260132							Rab3b	69908	-1.45696	0.00895198
Tmem37	170706	-1.43231	0.00914365							Trpm6	225997	-1.45715	0.00101346
Klrd1	16643	-1.43649	0.00160407							Efna1	13636	-1.46349	2.88275e-05
Mir200a	387242	-1.43863	0.00638838							Cd200r2	271375	-1.4652	0.00487645
Dlk1	13386	-1.44076	0.000141168							4732465J04Rik	414105	-1.47159	0.0068319
Lipo1	381236	-1.45216	0.000232392							Saa1	20208	-1.48768	0.00589882
Dab1	13131	-1.45258	0.00344136							Bmp2	12156	-1.48802	0.000798625
Mir30e	723836	-1.45798	0.00667388							Spats2l	67198	-1.49163	0.000120739
Hepacam	72927	-1.46151	0.00954732							Tgm3	21818	-1.50283	0.00862906
Dthd1	100322896	-1.46393	0.00157419							Krt84	16680	-1.50663	0.00227926
4732465J04Rik	414105	-1.46424	0.0071127							4930539E08Rik	207819	-1.52802	1.9825e-05
Lancl3	236285	-1.46484	0.00104167							Tmem140	68487	-1.54509	0.000184536
Npas2	18143	-1.46765	0.00090133							Olfr920	258783	-1.55636	0.00066399
Nlrp9b	243874	-1.46954	0.00734203							BC025446	223631	-1.56076	0.00377642
Gm5617	434402	-1.47177	1.00753e-07							Fbxo32	67731	-1.56644	0.000123695
Gm13139	666532	-1.4762	0.00907347							Bnip3	12176	-1.58145	0.00740631
Sst	20604	-1.47622	0.00304744							Ifit1	15957	-1.58231	0.00370304
Mir192	387187	-1.4784	0.00335855							Asb11	68854	-1.5847	0.00176852
Trpm5	56843	-1.48117	0.00386165							Slfn4	20558	-1.5871	0.00823351
Nrn1	68404	-1.48356	0.000584067							Gcnt1	14537	-1.59637	0.00773349
Kcnj2	16518	-1.48909	6.88183e-05							Gpr137b-ps	664862	-1.59673	0.00414068
Armcx6	278097	-1.49246	0.000296139							Slc20a1	20515	-1.59779	0.0036133
Casc4	319996	-1.49246	0.000375714							2010002M12Rik	112419	-1.60143	0.00205449
Apoc1	11812	-1.49369	0.00351969							Themis3	74556	-1.60549	8.34904e-05
Sytl5	236643	-1.49726	2.09159e-05							Sectm1a	209588	-1.60575	0.000658607
Gpr17	574402	-1.49762	0.00105745							Ppp3r2	19059	-1.61298	0.00265747
Vill	22351	-1.49791	0.00214679							Klra6	16637	-1.63502	0.0034948
Dxo	112403	-1.4993	0.00839069							Slc46a1	52466	-1.63516	0.0077113
Pyy	217212	-1.50208	0.000205196							Upp1	22271	-1.64483	0.00844144
Tdrd1	83561	-1.50423	3.527e-05							Hepacam	72927	-1.65997	0.000909066
Asb11	68854	-1.51136	0.004106							Oasl2	23962	-1.71127	0.00248756
2610524H06Rik	330173	-1.51397	0.00209797							Oas3	246727	-1.74674	0.00389188
Kremen2	73016	-1.5164	5.06699e-06							Klb	83379	-1.77714	0.00478488
Rgs13	246709	-1.51766	0.00427543							Olfr1368	258527	-1.78178	2.8709e-05
Zfp605	675812	-1.51999	0.00130481							Cyp2d9	13105	-1.78919	0.000718677
4930539E08Rik	207819	-1.52295	1.76786e-05							Fam154a	75811	-1.80315	0.00264046
Epb4.1l4a	13824	-1.52481	0.000769672							Abcg5	27409	-1.81318	0.000987521
Ptprn	19275	-1.52902	0.00124086							Ddx60	234311	-1.84798	0.000465336
Ccdc92	215707	-1.53227	0.000660531							Slc37a2	56857	-1.85622	0.00489612
Sh2d6	71130	-1.53941	8.04955e-06							Oaz3	53814	-1.86996	0.0088386
P2ry4	57385	-1.5427	6.76797e-05							Cyp2d12	380997	-1.87605	0.00100821
H2-K2	630499	-1.54725	1.83902e-05							Edn1	13614	-1.90905	0.000912035
Ifit1	15957	-1.54751	0.00515973							Rps4l	66184	-1.93167	6.84902e-08
Alox5	11689	-1.54788	4.87042e-05							Gbp2	14469	-1.99008	0.00762126
BC025446	223631	-1.54999	0.00397226							Gm6280	622052	-2.00287	0.00699202
Gjb5	14622	-1.56027	0.00232357							Car3	12350	-5.3828	0.00716889
Scg3	20255	-1.56087	6.67291e-05
Saa1	20208	-1.5613	0.00206776
Olfr1175-ps	546770	-1.56321	0.00285111
Ddx43	100048658	-1.56469	0.00693123
Tppp	72948	-1.57251	0.000119728
Spats2l	67198	-1.57631	1.76786e-05
Tmem140	68487	-1.58983	6.67291e-05
Sh2d7	244885	-1.59154	0.000259214
Slfn4	20558	-1.59407	0.00730505
Pcsk1n	30052	-1.61342	0.000108806
Cyp2d12	380997	-1.62333	0.00853771
Abcg1	11307	-1.63214	1.94013e-06
Mir429	723865	-1.64249	0.00342597
Zfp783	232785	-1.64281	0.000144937
Gcnt1	14537	-1.65723	0.00399425
2010002M12Rik	112419	-1.65731	0.000895944
Ubtd2	327900	-1.66125	5.49528e-08
Spink3	20730	-1.69118	0.00116448
Ccl5	20304	-1.70237	0.00580713
Cyp2d9	13105	-1.7041	0.00146245
Cyp2d10	13101	-1.71543	0.000959734
Zbp1	58203	-1.71624	0.000154415
Ctsw	13041	-1.71994	0.000276588
Upp1	22271	-1.73647	0.00356748
Pex5l	58869	-1.74053	1.51371e-06
Olfr1368	258527	-1.77469	2.53896e-05
Edn1	13614	-1.79011	0.00216241
Tcrg-C4	107576	-1.79278	0.00136083
Sectm1a	209588	-1.79357	4.35761e-05
Resp18	19711	-1.80891	6.27331e-05
Map10	74393	-1.81953	6.97742e-07
Krt84	16680	-1.82753	2.23824e-05
Ak4	11639	-1.85944	0.000392286
Nts	67405	-1.92089	0.00411425
Zfp37	22696	-1.93096	1.86747e-06
Fam154a	75811	-1.93182	0.000799605
Scnn1b	20277	-1.96072	0.000470146
Cd7	12516	-1.96506	0.000626373
2210407C18Rik	78354	-1.96598	0.000362573
Ppp3r2	19059	-1.99888	3.63865e-05
Frmd3	242506	-2.00763	6.04221e-06
Gbp2	14469	-2.04847	0.00529471
Nkg7	72310	-2.12676	7.07324e-05
Klra6	16637	-2.14942	2.09159e-05
Rps4l	66184	-2.20179	2.91429e-09
Dhrs9	241452	-2.29778	0.00492389
Lpl	16956	-2.36662	0.000133243
Cadps	27062	-2.51894	2.33324e-07
Ido1	15930	-2.64959	2.02133e-07
2310079G19Rik	69699	-2.70739	8.98374e-05
Grin3a	242443	-2.80856	0.00027285
