# Supplementary material for: Integrative analysis of gut microbiota composition, host colonic gene expression and intraluminal metabolites in aging C57BL/6J mice
Source: Aging (Albany NY). 2018 May 16;10(5):930–50. doi: 10.18632/aging.101439 (PMC5990381; doi:10.18632/aging.101439)
Supplement: Data Set S3 [file aging-10-101439-s005.xlsx]

## Sheet: correlations
Gene	Parabacteroides	Lactobacillus	Uncultured Gastranaerophilales	Incertae Sedis family XIII	Alloprevotella	Uncultured Coriobacteriaceae	Bifidobacterium	Uncultured Peptococcaceae	Bilophila	Ruminococcus	Desulfovibrio	Uncultured Lachnospiraceae	Oscillibacter	Anaerovorax	Peptococcus	Akkermansia	Parasutterella	Allobaculum	Uncultured Porphyromonadaceae	Anaerotruncus	Uncultured Defluviitaleaceae	Incertae Sedis Defluviitaleaceae	Blautia	unidentified vadinBB60	Bacillus	Coprococcus	Bacteroides	Incertae Sedis Erysipelotrichaceae	RC9 gut group	Uncultured Christensenellaceae	Odoribacter	Uncultured bacterium vadinBB60	Incertae Sedis Peptostreptococcaceae	Roseburia	Uncultured bacterium S247	Intestinimonas	Clostridium sensu stricto 1	Alistipes	Uncultured Peptostreptococcaceae	Uncultured bacterium VC2 1 Bac22	Uncultured Ruminococcaceae family	Incertae Sedis Ruminococcaceae	Uncultured Erysipelotrichaceae	Uncultured Lachnospiraceae	Candidatus Saccharimonas	Turicibacter	Incertae Sedis Lachnospiraceae
PDGFRB	-0.766449	-0.744581	-0.465915	-0.386801	-0.732505	-0.66051	-0.770826	-0.593789	-0.122113	0.0626591	-0.0425511	-0.545898	-0.527375	-0.222173	-0.102094	-0.0227414	-0.6314	-0.615194	-0.225477	-0.244808	-0.177684	-0.0836901	0.117555	0.110189	0.345137	-0.245143	0.00631229	-0.0302601	0.385501	0.18982	0.427524	0.666427	0.477666	0.562661	0.314015	0.322281	0.324652	0.429977	0.612187	0.586541	0.510511	0.651031	0.526291	0.73234	0.727233	0.817034	0.809292
KDR	-0.74569	-0.739088	-0.458735	-0.379761	-0.747391	-0.682198	-0.787181	-0.58713	-0.0976525	0.0583183	-0.0552527	-0.567938	-0.564459	-0.256403	-0.128987	-0.0537592	-0.597766	-0.584114	-0.186791	-0.200724	-0.130544	-0.0385913	0.176408	0.155795	0.392868	-0.280447	-0.0388724	-0.0678756	0.339583	0.139121	0.44912	0.673075	0.487048	0.557504	0.295231	0.319686	0.313774	0.417748	0.592732	0.561608	0.536672	0.66103	0.530392	0.756807	0.741438	0.814284	0.809292
CALCRL	-0.738863	-0.736673	-0.453614	-0.37637	-0.750949	-0.687111	-0.788403	-0.590874	-0.101742	0.0487094	-0.0694058	-0.581911	-0.58215	-0.273143	-0.140676	-0.0680444	-0.584579	-0.574156	-0.172582	-0.191682	-0.120107	-0.0310509	0.194462	0.17161	0.411732	-0.283528	-0.0460337	-0.0754731	0.327885	0.122857	0.464692	0.680887	0.496975	0.563137	0.298162	0.321649	0.316204	0.418088	0.589779	0.555645	0.538952	0.659095	0.524133	0.766049	0.744126	0.813206	0.807898
WNT2B	-0.745509	-0.740049	-0.469452	-0.383767	-0.749491	-0.687487	-0.80061	-0.561752	-0.0497643	0.0921425	-0.012995	-0.536777	-0.537008	-0.2301	-0.114525	-0.0340463	-0.607882	-0.584228	-0.195864	-0.181743	-0.113629	-0.0126097	0.175962	0.147901	0.374485	-0.311516	-0.0663056	-0.0838989	0.328812	0.141628	0.411166	0.647525	0.45677	0.526345	0.258713	0.307478	0.289226	0.399791	0.578713	0.553129	0.558808	0.679762	0.559802	0.747611	0.746265	0.813006	0.81279
EMCN	-0.737772	-0.736425	-0.457328	-0.37751	-0.751662	-0.68929	-0.793566	-0.580379	-0.0822956	0.0618086	-0.0531427	-0.569898	-0.571976	-0.263548	-0.135615	-0.0610812	-0.587289	-0.573023	-0.175024	-0.182988	-0.11219	-0.0196956	0.195677	0.169583	0.405495	-0.296416	-0.0579091	-0.0826667	0.32227	0.122451	0.450083	0.670609	0.485036	0.550435	0.283185	0.316592	0.306105	0.410468	0.583401	0.551318	0.547939	0.666255	0.53541	0.762577	0.745894	0.812102	0.808738
TEK	-0.740796	-0.739719	-0.474974	-0.384891	-0.754767	-0.69644	-0.81367	-0.543831	-0.0126359	0.113275	0.011612	-0.521902	-0.528144	-0.221163	-0.111529	-0.0285603	-0.606772	-0.577172	-0.192673	-0.158908	-0.0913845	0.0151257	0.189779	0.153677	0.374013	-0.340398	-0.0950483	-0.103383	0.310979	0.131253	0.391682	0.632704	0.439418	0.504984	0.230474	0.29902	0.270715	0.385321	0.56518	0.541903	0.579785	0.69472	0.580281	0.747781	0.753161	0.811899	0.815463
PREX2	-0.737657	-0.736339	-0.458168	-0.37779	-0.751578	-0.689467	-0.794445	-0.578059	-0.0782385	0.0647413	-0.0494112	-0.566949	-0.569279	-0.261045	-0.134204	-0.0592165	-0.588164	-0.573024	-0.175941	-0.181498	-0.110911	-0.0176463	0.195318	0.168647	0.403578	-0.298868	-0.0600633	-0.0838609	0.321462	0.122867	0.44658	0.668189	0.482244	0.547615	0.280033	0.315463	0.303948	0.408861	0.582123	0.550553	0.549593	0.667656	0.537797	0.761469	0.746051	0.81179	0.808828
GREM2	-0.752339	-0.742699	-0.485743	-0.391294	-0.746041	-0.685736	-0.811401	-0.530506	0.00387972	0.137964	0.0470723	-0.487304	-0.486793	-0.182722	-0.085482	0.00333615	-0.633107	-0.595426	-0.221967	-0.173133	-0.108922	0.00463889	0.153324	0.120467	0.332325	-0.338785	-0.0853533	-0.0908082	0.331504	0.163651	0.353072	0.611027	0.413233	0.487002	0.21766	0.292188	0.260878	0.380479	0.567085	0.550816	0.577563	0.699969	0.59629	0.725808	0.746642	0.811639	0.816654
MMRN1	-0.751674	-0.74135	-0.480289	-0.389031	-0.743935	-0.682174	-0.804014	-0.54149	-0.0182969	0.122369	0.027836	-0.500661	-0.498284	-0.194119	-0.0916758	-0.0053276	-0.628036	-0.594948	-0.217969	-0.182086	-0.117049	-0.00775836	0.152658	0.123399	0.339752	-0.323736	-0.0721858	-0.082936	0.336517	0.162868	0.369717	0.621833	0.426427	0.500669	0.234284	0.297417	0.271883	0.388329	0.572974	0.554256	0.56639	0.690376	0.582017	0.728784	0.743297	0.811192	0.813986
TCF4	-0.75436	-0.738295	-0.464084	-0.383265	-0.733726	-0.66561	-0.776117	-0.579207	-0.0967982	0.0721206	-0.0324837	-0.539604	-0.527647	-0.223774	-0.105893	-0.0267056	-0.619171	-0.600591	-0.213717	-0.221637	-0.154575	-0.0588369	0.137017	0.122615	0.353289	-0.266237	-0.0185687	-0.04846	0.363563	0.171926	0.419543	0.655931	0.467721	0.546854	0.293268	0.315245	0.310593	0.416998	0.596878	0.57136	0.523765	0.656662	0.534257	0.733082	0.729168	0.810486	0.805348
ABCA8A	-0.750395	-0.739951	-0.477194	-0.387517	-0.742433	-0.680132	-0.8	-0.546037	-0.028357	0.1149	0.0186474	-0.506715	-0.503653	-0.199695	-0.0948225	-0.00976319	-0.624653	-0.593778	-0.215411	-0.185557	-0.120157	-0.0129943	0.152933	0.125221	0.3435	-0.316824	-0.066515	-0.0796398	0.337976	0.161718	0.377427	0.626387	0.432318	0.506529	0.241612	0.299551	0.276643	0.391486	0.574948	0.555033	0.56095	0.685358	0.574838	0.729793	0.741206	0.810184	0.811969
ASPN	-0.741259	-0.736976	-0.466609	-0.38163	-0.747955	-0.686524	-0.798343	-0.560763	-0.0504585	0.089474	-0.0164674	-0.538521	-0.539739	-0.233602	-0.11714	-0.037583	-0.60247	-0.579694	-0.191541	-0.178694	-0.110449	-0.0104816	0.1801	0.151514	0.3781	-0.311429	-0.0680803	-0.0856792	0.324618	0.136918	0.413712	0.647316	0.457724	0.525942	0.258464	0.306922	0.288798	0.39848	0.575966	0.549704	0.557655	0.677093	0.556445	0.747518	0.744524	0.810032	0.809756
PECAM1	-0.744864	-0.737225	-0.471773	-0.384226	-0.743534	-0.681811	-0.798021	-0.551039	-0.0371625	0.104025	0.00379892	-0.519319	-0.518261	-0.213933	-0.104326	-0.0217798	-0.61374	-0.586335	-0.204502	-0.181714	-0.115209	-0.0112779	0.164803	0.13659	0.357946	-0.314478	-0.0676866	-0.0825425	0.331111	0.150352	0.392137	0.63401	0.442215	0.51358	0.247905	0.302015	0.281026	0.39348	0.574	0.5514	0.558884	0.680753	0.566139	0.736139	0.741381	0.80854	0.809502
ELTD1	-0.724745	-0.730128	-0.444735	-0.369836	-0.754543	-0.693607	-0.789351	-0.591917	-0.102285	0.0365948	-0.0876949	-0.599473	-0.606426	-0.297056	-0.15804	-0.0893753	-0.561592	-0.55539	-0.149201	-0.173424	-0.100013	-0.0150122	0.224092	0.196626	0.439718	-0.291589	-0.0613438	-0.0899884	0.305703	0.0953731	0.484508	0.688435	0.50814	0.566733	0.29748	0.322291	0.316109	0.414941	0.580976	0.542591	0.543646	0.655849	0.515424	0.777744	0.746622	0.80836	0.803136
PTPRB	-0.737185	-0.734936	-0.464703	-0.379971	-0.748604	-0.688152	-0.798966	-0.559189	-0.0476693	0.0883361	-0.018636	-0.540888	-0.544071	-0.238076	-0.120698	-0.0418945	-0.596797	-0.574521	-0.185929	-0.172715	-0.104157	-0.00474577	0.187652	0.157435	0.38403	-0.31523	-0.0736723	-0.0903643	0.318041	0.129874	0.41632	0.647369	0.458531	0.524698	0.255933	0.306181	0.287128	0.396359	0.572521	0.545508	0.559908	0.677017	0.555666	0.749582	0.745056	0.808256	0.808291
CDH5	-0.734828	-0.732433	-0.453248	-0.37507	-0.746245	-0.683272	-0.785804	-0.582038	-0.0917662	0.0556524	-0.0596976	-0.571051	-0.571615	-0.264869	-0.135944	-0.0625369	-0.584063	-0.571525	-0.174577	-0.187817	-0.117216	-0.0267479	0.191379	0.167503	0.403851	-0.287229	-0.0501574	-0.0772397	0.324951	0.124142	0.453148	0.671052	0.487213	0.553213	0.289179	0.317147	0.309388	0.412063	0.583725	0.551136	0.53945	0.658612	0.526919	0.758586	0.740059	0.807933	0.803581
TIE1	-0.737625	-0.732545	-0.456211	-0.376693	-0.742663	-0.679165	-0.784305	-0.57697	-0.0860681	0.0636419	-0.0481147	-0.559248	-0.557714	-0.252244	-0.127466	-0.0522575	-0.591776	-0.576624	-0.183679	-0.191928	-0.122468	-0.0298084	0.179675	0.156787	0.390109	-0.286647	-0.0472706	-0.0733217	0.330958	0.134226	0.440161	0.663251	0.478162	0.546664	0.284515	0.314534	0.305737	0.409921	0.583546	0.553246	0.538317	0.659669	0.531602	0.750725	0.737202	0.80692	0.803069
PDE7B	-0.741601	-0.735848	-0.477048	-0.385427	-0.744393	-0.685342	-0.806086	-0.533207	-0.00476803	0.125009	0.0297399	-0.500021	-0.502453	-0.199294	-0.0969094	-0.0115064	-0.616349	-0.582826	-0.206945	-0.165943	-0.100667	0.00866089	0.168572	0.134687	0.34905	-0.336225	-0.0883868	-0.0953812	0.320109	0.147831	0.368754	0.616887	0.422697	0.492261	0.222723	0.293404	0.263984	0.380292	0.562391	0.542956	0.573737	0.691969	0.583956	0.730542	0.74393	0.80579	0.809996
FLT1	-0.732202	-0.72873	-0.445809	-0.371481	-0.741227	-0.676665	-0.774659	-0.592778	-0.117061	0.0379286	-0.081009	-0.583924	-0.582069	-0.276232	-0.141975	-0.0715076	-0.577189	-0.569832	-0.170298	-0.198255	-0.127004	-0.0416064	0.188826	0.169365	0.410014	-0.268589	-0.0341856	-0.067327	0.330542	0.123902	0.470117	0.68104	0.500422	0.567047	0.30746	0.322122	0.32109	0.419903	0.588958	0.553812	0.524593	0.645499	0.509046	0.759081	0.733672	0.804959	0.798051
DYSF	-0.723132	-0.726799	-0.443013	-0.368576	-0.748835	-0.687445	-0.783167	-0.589756	-0.10496	0.0364911	-0.0863099	-0.59419	-0.599415	-0.292006	-0.154407	-0.0857177	-0.562149	-0.555814	-0.152539	-0.177541	-0.104836	-0.0201706	0.216441	0.190659	0.432331	-0.285801	-0.0557495	-0.0851994	0.309218	0.100391	0.479968	0.684299	0.504726	0.564608	0.298356	0.320983	0.315883	0.414257	0.580148	0.542507	0.537608	0.651019	0.511874	0.770989	0.741001	0.804336	0.798784
PODXL	-0.710235	-0.724234	-0.437867	-0.364032	-0.760129	-0.702976	-0.794448	-0.588659	-0.0929832	0.0303704	-0.0991639	-0.613265	-0.628429	-0.318418	-0.174435	-0.108944	-0.53919	-0.535541	-0.125504	-0.14953	-0.0744115	0.00814506	0.257088	0.222916	0.467464	-0.307477	-0.0841195	-0.109534	0.279405	0.065679	0.499185	0.692479	0.514909	0.565044	0.289518	0.320937	0.31134	0.408338	0.569208	0.527229	0.554329	0.657218	0.51278	0.789945	0.751556	0.803995	0.799859
PPAP2B	-0.714072	-0.728547	-0.461426	-0.373842	-0.764339	-0.712664	-0.821449	-0.539577	0.000570632	0.0993143	-0.0124628	-0.549053	-0.56991	-0.261841	-0.14234	-0.0655814	-0.565003	-0.540824	-0.148857	-0.116913	-0.0461657	0.0551529	0.249604	0.201922	0.42559	-0.366664	-0.134228	-0.137573	0.263905	0.0770905	0.421032	0.641669	0.453795	0.504042	0.218706	0.297341	0.2638	0.374508	0.544593	0.514379	0.597161	0.695389	0.572907	0.770231	0.761339	0.803636	0.808805
SORBS3	-0.74817	-0.735694	-0.481916	-0.388426	-0.735072	-0.674128	-0.799508	-0.52587	-0.00059091	0.13751	0.0492726	-0.477561	-0.474174	-0.173966	-0.079272	0.00940964	-0.632782	-0.594956	-0.22708	-0.179646	-0.116736	-0.00395921	0.140293	0.110304	0.319385	-0.328478	-0.0758704	-0.0826573	0.336701	0.171677	0.344832	0.602946	0.406744	0.482513	0.218697	0.289439	0.259992	0.378594	0.564592	0.549592	0.566371	0.690546	0.589198	0.713139	0.735815	0.803341	0.8078
ROBO4	-0.734006	-0.724788	-0.432273	-0.366448	-0.729975	-0.659997	-0.749116	-0.621767	-0.181179	-0.00186468	-0.127863	-0.611692	-0.601046	-0.296475	-0.150844	-0.0859479	-0.571198	-0.57522	-0.169453	-0.232648	-0.160209	-0.0856756	0.171312	0.164762	0.416017	-0.21934	0.0121136	-0.0367736	0.354763	0.134713	0.506891	0.705882	0.531264	0.602734	0.355086	0.335671	0.351917	0.442573	0.607943	0.567898	0.487221	0.616156	0.469332	0.758599	0.719372	0.802473	0.789053
PRICKLE2	-0.753012	-0.733116	-0.467933	-0.383926	-0.723035	-0.655407	-0.771235	-0.560446	-0.0750512	0.0926753	-0.00334642	-0.509059	-0.494811	-0.195545	-0.0880773	-0.00532753	-0.629192	-0.604117	-0.228745	-0.221685	-0.157451	-0.0567028	0.117388	0.102786	0.324303	-0.271097	-0.0207544	-0.0459278	0.367588	0.187172	0.386333	0.63223	0.442289	0.52455	0.274518	0.305666	0.296313	0.405949	0.588551	0.568233	0.523559	0.658052	0.54498	0.712807	0.72034	0.802421	0.799312
TGFBR3	-0.718215	-0.728423	-0.466229	-0.376369	-0.758328	-0.705919	-0.819029	-0.530585	0.0109067	0.112904	0.00713455	-0.529148	-0.54674	-0.240878	-0.128361	-0.0486234	-0.57733	-0.548729	-0.163564	-0.122939	-0.0540991	0.0509088	0.230783	0.184509	0.402974	-0.36637	-0.130263	-0.131665	0.273104	0.0932288	0.399117	0.62826	0.438353	0.492551	0.210217	0.292718	0.257216	0.370456	0.5437	0.5173	0.595652	0.697246	0.580887	0.757091	0.756557	0.801624	0.807714
S1PR1	-0.742268	-0.732466	-0.476422	-0.38499	-0.735475	-0.675152	-0.797007	-0.529982	-0.00863223	0.127301	0.0354318	-0.488877	-0.487413	-0.187129	-0.0881091	-0.00185338	-0.621953	-0.587383	-0.216607	-0.175732	-0.111844	-0.00217131	0.151403	0.12092	0.332664	-0.326156	-0.0770805	-0.0854302	0.329837	0.16078	0.358219	0.609471	0.415567	0.488569	0.224237	0.29144	0.26376	0.380036	0.563108	0.545613	0.564048	0.685689	0.58062	0.718458	0.735357	0.801064	0.804769
JAM3	-0.764731	-0.737065	-0.488715	-0.394143	-0.715981	-0.649203	-0.781075	-0.523787	-0.0147257	0.148675	0.0713593	-0.445295	-0.427462	-0.132223	-0.0482119	0.0453068	-0.665436	-0.622998	-0.267079	-0.219131	-0.160171	-0.043966	0.0795114	0.0615023	0.264814	-0.297568	-0.0356209	-0.0475059	0.378945	0.222751	0.312294	0.586831	0.387972	0.477869	0.228295	0.287598	0.263986	0.384725	0.577831	0.569732	0.541323	0.68042	0.588071	0.681909	0.718024	0.801014	0.803721
GPR116	-0.718429	-0.725303	-0.451898	-0.370827	-0.751186	-0.694103	-0.797165	-0.56162	-0.0526757	0.0702491	-0.0447985	-0.564017	-0.575027	-0.269139	-0.142933	-0.0696183	-0.566581	-0.550423	-0.156209	-0.151869	-0.0810298	0.0123875	0.223383	0.188302	0.419005	-0.32149	-0.0896153	-0.106363	0.291342	0.0958867	0.443092	0.657552	0.473963	0.53085	0.257947	0.307441	0.288679	0.393346	0.561876	0.529228	0.562372	0.669875	0.541138	0.763077	0.746055	0.800744	0.800437
EGFL7	-0.734877	-0.730462	-0.471258	-0.381519	-0.740764	-0.682151	-0.800037	-0.534045	-0.0114992	0.11729	0.0201713	-0.505038	-0.50824	-0.206493	-0.101752	-0.0183082	-0.607158	-0.576023	-0.200041	-0.164149	-0.0985844	0.0081072	0.173452	0.139893	0.355126	-0.331647	-0.0870586	-0.0954464	0.31558	0.141366	0.375861	0.618554	0.426773	0.494618	0.226457	0.293634	0.265945	0.380118	0.559589	0.538668	0.568462	0.68499	0.575022	0.730123	0.739713	0.800665	0.804201
GALNT15	-0.754841	-0.73237	-0.471786	-0.385612	-0.718665	-0.651018	-0.770462	-0.55107	-0.0626523	0.105305	0.0142373	-0.49206	-0.476179	-0.178781	-0.0773098	0.00788471	-0.63762	-0.60855	-0.239001	-0.223049	-0.160351	-0.0562683	0.105157	0.0905854	0.307286	-0.274318	-0.021458	-0.0440024	0.371806	0.197607	0.36737	0.619928	0.428324	0.512923	0.264442	0.300927	0.288859	0.400784	0.585684	0.568489	0.524669	0.66077	0.55301	0.702538	0.717085	0.800125	0.798178
ARHGEF17	-0.725362	-0.730007	-0.480438	-0.383085	-0.752001	-0.700333	-0.824836	-0.503103	0.0546859	0.153228	0.0611381	-0.482197	-0.497241	-0.194803	-0.099421	-0.0120452	-0.602406	-0.561298	-0.190835	-0.120651	-0.0557317	0.0602757	0.203273	0.154543	0.359466	-0.38509	-0.141037	-0.132777	0.280621	0.118563	0.344947	0.594354	0.39833	0.457888	0.176298	0.279124	0.233317	0.354394	0.534909	0.517372	0.607628	0.712297	0.611109	0.733555	0.753659	0.799219	0.809523
FGD5	-0.739805	-0.731416	-0.481533	-0.386312	-0.736054	-0.678048	-0.804236	-0.513687	0.020838	0.146849	0.0597393	-0.470596	-0.472036	-0.172853	-0.0806683	0.00833605	-0.62519	-0.584894	-0.219742	-0.162108	-0.0994163	0.0153147	0.153635	0.118183	0.323436	-0.345577	-0.0952815	-0.0965157	0.320693	0.159571	0.336143	0.593555	0.397346	0.469005	0.201354	0.283562	0.24825	0.368143	0.55286	0.538413	0.577317	0.695959	0.597117	0.712845	0.737516	0.798692	0.805343
ARAP3	-0.707922	-0.720282	-0.441724	-0.364637	-0.753647	-0.697732	-0.793872	-0.571059	-0.0688852	0.0497769	-0.072881	-0.588141	-0.603131	-0.296432	-0.161199	-0.0926451	-0.545747	-0.536139	-0.13521	-0.144066	-0.0710918	0.0162498	0.246565	0.210347	0.446916	-0.317658	-0.0924743	-0.112372	0.27787	0.0738455	0.471137	0.672127	0.492803	0.544153	0.269568	0.312109	0.29683	0.397017	0.559959	0.522182	0.558996	0.66153	0.524987	0.77553	0.746766	0.797812	0.795998
X5430435G22RIK	-0.736268	-0.725562	-0.454291	-0.375051	-0.727921	-0.662948	-0.769603	-0.569774	-0.0895552	0.067838	-0.0385094	-0.540795	-0.533929	-0.23348	-0.114222	-0.0378672	-0.598155	-0.581233	-0.196981	-0.204405	-0.137181	-0.0440079	0.155016	0.136712	0.365272	-0.272714	-0.0322176	-0.0596919	0.343204	0.152063	0.422695	0.649901	0.465622	0.538705	0.284485	0.310378	0.30362	0.407666	0.582253	0.554962	0.523826	0.649466	0.526299	0.731125	0.723057	0.797743	0.793367
P2RY14	-0.728948	-0.725152	-0.459513	-0.375573	-0.736495	-0.676355	-0.786652	-0.550471	-0.046805	0.0895462	-0.0145079	-0.528994	-0.530727	-0.229452	-0.115231	-0.0367909	-0.59255	-0.569724	-0.187997	-0.173898	-0.106765	-0.00800966	0.178614	0.149815	0.372345	-0.308781	-0.0693715	-0.0859697	0.317843	0.133647	0.405841	0.635954	0.449223	0.515966	0.252171	0.301393	0.282777	0.390992	0.565664	0.539952	0.550443	0.667432	0.549071	0.735759	0.733232	0.797003	0.797023
TSHZ3	-0.707073	-0.717077	-0.427568	-0.358953	-0.747714	-0.687664	-0.773828	-0.60071	-0.12885	0.00839713	-0.1237	-0.623106	-0.632597	-0.325663	-0.176792	-0.114655	-0.533574	-0.53611	-0.125961	-0.169514	-0.0944286	-0.018368	0.242776	0.216603	0.465134	-0.276403	-0.055822	-0.0900997	0.292923	0.0735698	0.514843	0.700861	0.527757	0.580891	0.314593	0.326214	0.326613	0.418471	0.576486	0.532367	0.528455	0.635796	0.48696	0.782803	0.737552	0.796935	0.789104
ENG	-0.694927	-0.717763	-0.43989	-0.361299	-0.76505	-0.71432	-0.808835	-0.561694	-0.0419459	0.0544813	-0.0720456	-0.596694	-0.622588	-0.313837	-0.176162	-0.109107	-0.52623	-0.516087	-0.111548	-0.110551	-0.0358991	0.0522127	0.286131	0.23935	0.475309	-0.348601	-0.128918	-0.141237	0.245134	0.0406081	0.477726	0.671751	0.492967	0.534468	0.24922	0.308059	0.284471	0.385356	0.544558	0.504304	0.582149	0.673254	0.53497	0.790847	0.758312	0.796729	0.797816
CD93	-0.704768	-0.718637	-0.438731	-0.362788	-0.754055	-0.698474	-0.792649	-0.573525	-0.0734545	0.0440215	-0.0807158	-0.594672	-0.610748	-0.303931	-0.166223	-0.0990219	-0.539773	-0.532002	-0.129339	-0.141905	-0.0683614	0.0172487	0.252884	0.216383	0.454513	-0.316412	-0.0931655	-0.113953	0.274075	0.0677234	0.47881	0.675978	0.497907	0.54771	0.272771	0.313317	0.299035	0.397934	0.559264	0.52007	0.557812	0.658944	0.520267	0.778718	0.746686	0.796722	0.794481
KANK3	-0.743502	-0.723808	-0.444746	-0.372711	-0.714481	-0.643054	-0.74358	-0.596408	-0.150836	0.0350478	-0.0751116	-0.55871	-0.540318	-0.241653	-0.114624	-0.041908	-0.602149	-0.594253	-0.20664	-0.245584	-0.178149	-0.0936852	0.124365	0.12062	0.357708	-0.221296	0.0193712	-0.0235711	0.376218	0.174872	0.448392	0.669454	0.489529	0.570648	0.33021	0.322696	0.332898	0.430364	0.603772	0.573758	0.485039	0.621876	0.491409	0.724316	0.707196	0.796513	0.785842
CRIP2	-0.712141	-0.725079	-0.472095	-0.377073	-0.758229	-0.70955	-0.828284	-0.506033	0.0538076	0.140118	0.0409056	-0.5032	-0.525606	-0.221829	-0.118871	-0.0356195	-0.579	-0.54248	-0.165742	-0.101214	-0.0340664	0.0777729	0.236339	0.182478	0.391382	-0.394805	-0.157971	-0.148924	0.257304	0.0888185	0.36806	0.604687	0.412065	0.463528	0.176439	0.280801	0.234164	0.35221	0.527051	0.504754	0.614427	0.710759	0.603177	0.748701	0.758665	0.796386	0.806768
LTBP1	-0.703131	-0.722297	-0.462901	-0.37174	-0.763984	-0.716532	-0.828259	-0.517685	0.03751	0.118906	0.0110826	-0.531074	-0.558146	-0.252327	-0.139274	-0.0608491	-0.558272	-0.528599	-0.143197	-0.0922296	-0.0225035	0.083279	0.263173	0.20758	0.423496	-0.393102	-0.162714	-0.156767	0.242859	0.0645869	0.399567	0.622462	0.433706	0.479142	0.18888	0.286692	0.243352	0.357067	0.526465	0.498532	0.613778	0.704805	0.588439	0.765214	0.762557	0.79614	0.805038
ARHGEF15	-0.737185	-0.722092	-0.440881	-0.369945	-0.718972	-0.649153	-0.74673	-0.598504	-0.150844	0.0282939	-0.0858582	-0.57072	-0.55645	-0.25664	-0.125392	-0.0547917	-0.590119	-0.58462	-0.193105	-0.234844	-0.166106	-0.0837112	0.14292	0.136208	0.37569	-0.227455	0.00958551	-0.0328142	0.363621	0.158611	0.461324	0.675766	0.497414	0.574132	0.330223	0.323903	0.333479	0.429491	0.600042	0.56742	0.489816	0.622159	0.488108	0.733617	0.711036	0.796031	0.785457
CYYR1	-0.697021	-0.716336	-0.433608	-0.359236	-0.759112	-0.705356	-0.795695	-0.576744	-0.0751255	0.0347578	-0.0950038	-0.609922	-0.630782	-0.322651	-0.179533	-0.115063	-0.524895	-0.520339	-0.112825	-0.12971	-0.0545606	0.028235	0.274969	0.235201	0.476485	-0.322576	-0.103853	-0.124388	0.259335	0.0482061	0.495433	0.684204	0.508231	0.552797	0.273987	0.315091	0.300501	0.397402	0.555136	0.512645	0.562566	0.658423	0.515136	0.789906	0.750874	0.79595	0.793657
CD300LG	-0.733122	-0.721367	-0.43981	-0.368724	-0.722707	-0.654388	-0.751028	-0.596919	-0.14465	0.0280458	-0.0878291	-0.575251	-0.564323	-0.263726	-0.131036	-0.0611846	-0.583368	-0.578221	-0.184983	-0.22501	-0.155605	-0.073421	0.155816	0.146066	0.38595	-0.23591	-0.000798958	-0.0413478	0.353634	0.147721	0.465553	0.677124	0.49916	0.572743	0.325606	0.323296	0.330826	0.426736	0.5959	0.562176	0.496264	0.625102	0.489898	0.73922	0.714672	0.795905	0.78602
CPXM2	-0.729341	-0.72683	-0.473398	-0.380923	-0.73941	-0.6832	-0.803908	-0.518752	0.0134821	0.132419	0.0390587	-0.489654	-0.495925	-0.195964	-0.0967287	-0.0115611	-0.606022	-0.570507	-0.199976	-0.150443	-0.0859172	0.0243811	0.177544	0.139447	0.348814	-0.347884	-0.103641	-0.105896	0.304871	0.137414	0.357845	0.603929	0.411086	0.476901	0.206321	0.286149	0.252001	0.368627	0.548451	0.529787	0.578478	0.691394	0.586531	0.724289	0.739601	0.795861	0.801894
TIMP3	-0.742164	-0.723647	-0.452595	-0.375336	-0.715566	-0.646855	-0.753617	-0.575539	-0.11238	0.0616915	-0.0418077	-0.533782	-0.518593	-0.221132	-0.103495	-0.0267764	-0.608907	-0.59315	-0.212944	-0.229563	-0.16379	-0.0722848	0.124837	0.114987	0.343541	-0.246198	-0.00309356	-0.0368368	0.366511	0.175821	0.41821	0.648584	0.465171	0.545261	0.300636	0.312626	0.312919	0.415465	0.591669	0.565982	0.502421	0.636144	0.514176	0.716613	0.710436	0.794542	0.787707
ABCA9	-0.765315	-0.730819	-0.481987	-0.391165	-0.700599	-0.630289	-0.759678	-0.531236	-0.0448822	0.135041	0.0587868	-0.443454	-0.417725	-0.126568	-0.0418492	0.0502724	-0.668536	-0.629558	-0.277274	-0.243723	-0.185912	-0.0738329	0.053086	0.0441203	0.248528	-0.266072	-0.00423033	-0.0239676	0.399184	0.241384	0.31492	0.587831	0.391941	0.487546	0.248918	0.290517	0.275847	0.393123	0.585611	0.577725	0.514756	0.660753	0.567638	0.667353	0.701799	0.793771	0.793288
SYNE1	-0.727536	-0.723972	-0.467746	-0.378226	-0.735237	-0.677718	-0.795017	-0.526989	-0.00623652	0.118907	0.0229427	-0.499096	-0.503288	-0.204111	-0.100923	-0.0179544	-0.601179	-0.569595	-0.197256	-0.159068	-0.0941003	0.0123334	0.17468	0.140164	0.352758	-0.333044	-0.0907282	-0.0977315	0.309793	0.137973	0.370445	0.611379	0.420987	0.487489	0.220556	0.289951	0.261078	0.374753	0.552664	0.53213	0.566633	0.68111	0.572711	0.724192	0.734391	0.793509	0.797544
JAM2	-0.725466	-0.725812	-0.479941	-0.382512	-0.741893	-0.689072	-0.815104	-0.497849	0.053061	0.157387	0.0694847	-0.46813	-0.479169	-0.180138	-0.0890928	-0.000589837	-0.608477	-0.565738	-0.201559	-0.13006	-0.0667991	0.0499711	0.18461	0.13918	0.340549	-0.375609	-0.130233	-0.122824	0.290273	0.132529	0.331284	0.584506	0.388698	0.451858	0.175814	0.276121	0.23156	0.352857	0.534479	0.519342	0.597891	0.705957	0.608595	0.719449	0.744068	0.7934	0.803414
SLC43A3	-0.72511	-0.714953	-0.419197	-0.359018	-0.718941	-0.647463	-0.729695	-0.632142	-0.213577	-0.0260178	-0.156326	-0.625894	-0.612491	-0.311019	-0.15887	-0.0985005	-0.557195	-0.568297	-0.161393	-0.243976	-0.171026	-0.103909	0.168534	0.167612	0.423153	-0.193728	0.0323258	-0.024235	0.35868	0.131989	0.527305	0.715102	0.546054	0.617472	0.377031	0.340186	0.3652	0.449998	0.610552	0.567131	0.464742	0.594726	0.44221	0.755148	0.706529	0.793212	0.776496
FLT4	-0.716196	-0.723335	-0.472491	-0.377803	-0.748653	-0.697724	-0.817981	-0.505428	0.045139	0.141598	0.0462055	-0.491701	-0.508386	-0.207308	-0.107863	-0.0234064	-0.588786	-0.551324	-0.179595	-0.116956	-0.0513502	0.0608245	0.212915	0.164199	0.371017	-0.37996	-0.140592	-0.134246	0.273054	0.10749	0.357324	0.598546	0.40583	0.462483	0.18195	0.280083	0.236599	0.354645	0.531352	0.511332	0.601711	0.703562	0.598956	0.735371	0.74939	0.793192	0.802567
ADCY4	-0.718628	-0.719927	-0.452918	-0.370715	-0.738078	-0.679931	-0.786289	-0.550802	-0.0475723	0.0809638	-0.0272147	-0.540533	-0.546754	-0.245559	-0.126939	-0.0513086	-0.576308	-0.556446	-0.17195	-0.161583	-0.0932686	0.00255909	0.198383	0.166577	0.390962	-0.313574	-0.0793496	-0.095502	0.302647	0.114957	0.419101	0.640575	0.456534	0.518112	0.251777	0.301607	0.282632	0.388607	0.559238	0.530638	0.552785	0.664327	0.542314	0.742908	0.734053	0.792865	0.792896
SHE	-0.720963	-0.718665	-0.445197	-0.368183	-0.732268	-0.67063	-0.771606	-0.569887	-0.0878202	0.0561691	-0.0566146	-0.558838	-0.559562	-0.258654	-0.132709	-0.0604428	-0.57352	-0.560754	-0.171707	-0.183399	-0.114226	-0.0250436	0.187746	0.163975	0.395381	-0.283248	-0.0504786	-0.0765225	0.318327	0.121921	0.442844	0.657214	0.476622	0.541338	0.282036	0.310601	0.302418	0.403461	0.572069	0.540351	0.5303	0.647058	0.518344	0.743853	0.726326	0.792638	0.788588
GLIS2	-0.723241	-0.721757	-0.46231	-0.37521	-0.735908	-0.678485	-0.792005	-0.533779	-0.0184999	0.106588	0.00655178	-0.512511	-0.517868	-0.218257	-0.110018	-0.0296081	-0.591495	-0.563754	-0.18767	-0.158166	-0.0920949	0.0107916	0.184081	0.149999	0.366193	-0.327755	-0.0886	-0.0982367	0.305605	0.128756	0.386268	0.620256	0.43217	0.496533	0.229588	0.293265	0.267275	0.378342	0.553508	0.530243	0.562571	0.675435	0.562619	0.730248	0.73403	0.792398	0.795254
LYVE1	-0.737797	-0.726326	-0.480134	-0.384926	-0.726665	-0.668075	-0.795267	-0.507655	0.0210118	0.150476	0.0669198	-0.458076	-0.456698	-0.160877	-0.0724698	0.0172632	-0.628167	-0.586497	-0.227226	-0.167962	-0.106719	0.00851566	0.13956	0.106397	0.308166	-0.338603	-0.0879362	-0.08945	0.326521	0.169397	0.324095	0.583938	0.388297	0.46236	0.199353	0.280211	0.245542	0.365454	0.550578	0.538088	0.56924	0.689928	0.594475	0.700268	0.728582	0.792161	0.798722
GRIA3	-0.714328	-0.71931	-0.456725	-0.371257	-0.74219	-0.686994	-0.796256	-0.537028	-0.0190977	0.0966591	-0.00910139	-0.529795	-0.540912	-0.239681	-0.125358	-0.0479941	-0.574414	-0.550171	-0.168491	-0.143269	-0.0753382	0.0245205	0.210214	0.172047	0.391735	-0.336041	-0.102044	-0.111056	0.287988	0.10582	0.404936	0.629443	0.443635	0.501809	0.230047	0.295107	0.268388	0.377323	0.548414	0.521407	0.569014	0.675587	0.557596	0.743442	0.739361	0.791715	0.79465
PODN	-0.702569	-0.715346	-0.443591	-0.363847	-0.748954	-0.694978	-0.794336	-0.554547	-0.0453418	0.0657244	-0.0519222	-0.568634	-0.58526	-0.281428	-0.152941	-0.0823593	-0.546614	-0.532248	-0.138674	-0.133949	-0.0625283	0.028534	0.244338	0.204837	0.434563	-0.330157	-0.104885	-0.119152	0.270711	0.0746364	0.449235	0.654737	0.474474	0.525051	0.249983	0.303883	0.282791	0.385407	0.549042	0.514235	0.565397	0.665563	0.535211	0.7652	0.743442	0.791206	0.791701
RELN	-0.712646	-0.721237	-0.471899	-0.376719	-0.748412	-0.698549	-0.818934	-0.500888	0.0523806	0.144549	0.0495622	-0.489092	-0.507464	-0.206975	-0.108406	-0.0239427	-0.585523	-0.547289	-0.176747	-0.110738	-0.045243	0.0674689	0.217541	0.166967	0.372343	-0.385535	-0.147212	-0.138976	0.267194	0.103043	0.354258	0.594937	0.402407	0.457549	0.175902	0.277865	0.232416	0.350777	0.526855	0.507002	0.604985	0.704802	0.601084	0.734779	0.749383	0.790926	0.801039
PTPRM	-0.718581	-0.716496	-0.44163	-0.366215	-0.730421	-0.668471	-0.767338	-0.573557	-0.0968829	0.0488402	-0.065664	-0.564579	-0.564966	-0.264492	-0.136178	-0.0653104	-0.568984	-0.558413	-0.168253	-0.185614	-0.116095	-0.0290894	0.189082	0.16654	0.399615	-0.277079	-0.0459422	-0.0740817	0.318436	0.119612	0.450283	0.661087	0.482017	0.54633	0.288402	0.312292	0.306464	0.405838	0.572989	0.540035	0.525107	0.641811	0.511019	0.744614	0.723904	0.79083	0.785874
GGTA1	-0.695048	-0.710361	-0.421503	-0.353828	-0.747997	-0.690558	-0.773719	-0.596071	-0.122423	0.00456921	-0.130202	-0.628945	-0.6435	-0.33748	-0.186186	-0.126273	-0.517411	-0.5215	-0.110731	-0.153917	-0.078095	-0.00385697	0.262225	0.231985	0.480337	-0.285154	-0.0697828	-0.101884	0.275323	0.0548258	0.521678	0.700328	0.529643	0.577298	0.30823	0.323956	0.322206	0.412548	0.56669	0.520541	0.532881	0.633974	0.483304	0.787019	0.73748	0.790823	0.783711
PLOD2	-0.710349	-0.720694	-0.471499	-0.376092	-0.7502	-0.701211	-0.821292	-0.499268	0.0568277	0.145269	0.0496363	-0.49049	-0.510684	-0.209899	-0.110919	-0.0267287	-0.582138	-0.543834	-0.172734	-0.105121	-0.0393521	0.0734581	0.224147	0.171818	0.377072	-0.390623	-0.153266	-0.143776	0.261671	0.0974441	0.355358	0.594811	0.40241	0.455891	0.172508	0.277156	0.230337	0.348787	0.524203	0.50393	0.608742	0.706629	0.602621	0.737242	0.751192	0.790617	0.801208
ZFP366	-0.732239	-0.719319	-0.451811	-0.372779	-0.718525	-0.653383	-0.760499	-0.563078	-0.0885716	0.0706528	-0.0326196	-0.529368	-0.520498	-0.223573	-0.107638	-0.0309531	-0.598383	-0.580397	-0.201899	-0.207781	-0.141877	-0.0485542	0.144133	0.127489	0.352579	-0.266998	-0.0270222	-0.0544768	0.346173	0.158783	0.411946	0.640292	0.457016	0.531601	0.281613	0.306701	0.300298	0.404072	0.578398	0.552703	0.516329	0.642997	0.522868	0.719246	0.714043	0.790165	0.785792
CXCL12	-0.692359	-0.713624	-0.44571	-0.36256	-0.758385	-0.709499	-0.810317	-0.538709	-0.00841547	0.0807083	-0.0370865	-0.564721	-0.591028	-0.286033	-0.159647	-0.088472	-0.534832	-0.516697	-0.123388	-0.101624	-0.0296074	0.0650818	0.274776	0.224606	0.45031	-0.364487	-0.142282	-0.146853	0.241727	0.0497455	0.441537	0.645784	0.464376	0.507029	0.221947	0.296612	0.264951	0.370305	0.532345	0.497486	0.590669	0.680835	0.552736	0.773867	0.753899	0.789834	0.794177
FHL5	-0.705891	-0.712118	-0.43046	-0.359314	-0.737365	-0.677516	-0.768148	-0.584811	-0.111842	0.0254212	-0.0991241	-0.596344	-0.603332	-0.300692	-0.160855	-0.0957094	-0.542466	-0.539568	-0.139697	-0.171127	-0.0985829	-0.0184296	0.223964	0.198201	0.438811	-0.278592	-0.0557024	-0.0863741	0.297711	0.0880421	0.486055	0.680238	0.505828	0.56205	0.299569	0.318038	0.314918	0.409362	0.569697	0.530123	0.526532	0.6357	0.494952	0.764157	0.728772	0.789394	0.783125
ANTXR1	-0.706603	-0.721253	-0.482788	-0.379607	-0.756073	-0.71205	-0.840556	-0.469094	0.116818	0.183495	0.0958764	-0.459252	-0.486672	-0.186434	-0.0995909	-0.010095	-0.587648	-0.538291	-0.175758	-0.0747197	-0.0106864	0.112252	0.235291	0.171757	0.36549	-0.433597	-0.193808	-0.169688	0.240485	0.090502	0.316108	0.567107	0.369653	0.419318	0.126894	0.262787	0.2001	0.325965	0.504634	0.489658	0.639796	0.730678	0.637743	0.731963	0.760074	0.789183	0.805822
OLFML2B	-0.729812	-0.719965	-0.460974	-0.375765	-0.722932	-0.661571	-0.775498	-0.539359	-0.0415496	0.101073	0.00433056	-0.504164	-0.500689	-0.204228	-0.0980682	-0.0170752	-0.603568	-0.576757	-0.20518	-0.184674	-0.120208	-0.0187962	0.151678	0.126441	0.342371	-0.300324	-0.0581725	-0.0741957	0.330431	0.154423	0.380384	0.618245	0.43088	0.50277	0.245887	0.295397	0.276593	0.386291	0.563376	0.542001	0.540433	0.661919	0.55069	0.714596	0.720851	0.789177	0.78954
FNDC1	-0.69084	-0.711092	-0.437934	-0.359167	-0.754692	-0.703864	-0.799449	-0.552977	-0.0383938	0.0596372	-0.0629023	-0.582026	-0.605723	-0.30093	-0.167701	-0.0999076	-0.527602	-0.515661	-0.118053	-0.113783	-0.0407424	0.0481055	0.273321	0.228112	0.459625	-0.343673	-0.124188	-0.135922	0.248441	0.0488728	0.463401	0.65964	0.481625	0.524937	0.244198	0.303359	0.279551	0.380553	0.539815	0.501718	0.574884	0.667158	0.532918	0.776959	0.748544	0.788426	0.789759
MS4A4D	-0.682833	-0.707638	-0.426583	-0.353161	-0.757598	-0.706779	-0.794033	-0.569732	-0.0668049	0.0317469	-0.100207	-0.613508	-0.63968	-0.333292	-0.188379	-0.126212	-0.507162	-0.503918	-0.0970428	-0.112641	-0.0369779	0.0440039	0.294433	0.250318	0.490499	-0.331807	-0.11891	-0.136787	0.240124	0.0287393	0.500125	0.681176	0.507999	0.546749	0.265592	0.311598	0.294437	0.38973	0.543184	0.498863	0.566446	0.655487	0.510982	0.792043	0.749094	0.787612	0.786217
GNB4	-0.706916	-0.715599	-0.457123	-0.369663	-0.74322	-0.690845	-0.801379	-0.524517	0.0031521	0.107236	0.00304585	-0.521518	-0.537168	-0.236916	-0.125618	-0.0476105	-0.568381	-0.541269	-0.162604	-0.126433	-0.0588346	0.0433747	0.222021	0.178503	0.39409	-0.35332	-0.12112	-0.124435	0.273069	0.095258	0.394667	0.619398	0.433258	0.48773	0.212197	0.289075	0.256317	0.366846	0.537073	0.510931	0.580235	0.681673	0.566626	0.742576	0.741215	0.787525	0.792727
CCL11	-0.682517	-0.706833	-0.423454	-0.351871	-0.756229	-0.704536	-0.789616	-0.576036	-0.0796977	0.022805	-0.111179	-0.620998	-0.646003	-0.339605	-0.191759	-0.130992	-0.504406	-0.503788	-0.0949713	-0.118047	-0.0419344	0.0365976	0.293665	0.251703	0.494433	-0.32291	-0.111053	-0.13202	0.243265	0.0285955	0.509518	0.687287	0.515482	0.554589	0.27524	0.314592	0.300804	0.394283	0.546639	0.500948	0.559813	0.649852	0.502706	0.793534	0.747017	0.787302	0.784613
FGF7	-0.691024	-0.709452	-0.433603	-0.357446	-0.750713	-0.698254	-0.791133	-0.561356	-0.0577872	0.0476495	-0.0768853	-0.589864	-0.610819	-0.306629	-0.170109	-0.104016	-0.525622	-0.517099	-0.117927	-0.124289	-0.0509577	0.0345727	0.267548	0.226326	0.460861	-0.328433	-0.109932	-0.126435	0.255806	0.052365	0.474031	0.666627	0.490525	0.535343	0.258459	0.307242	0.288692	0.387179	0.545264	0.505748	0.563109	0.657823	0.520586	0.776153	0.743656	0.787156	0.786515
POSTN	-0.679645	-0.709332	-0.440111	-0.357715	-0.765341	-0.720084	-0.817096	-0.536175	0.00141853	0.0754108	-0.0475608	-0.578684	-0.613074	-0.306874	-0.175623	-0.107296	-0.514326	-0.49846	-0.100794	-0.0783132	-0.004532	0.0881288	0.307329	0.250425	0.477807	-0.381159	-0.165136	-0.166385	0.2165	0.0210732	0.455999	0.650545	0.47134	0.505855	0.214031	0.295674	0.260424	0.36432	0.521737	0.483417	0.602585	0.683832	0.55177	0.787077	0.76026	0.787138	0.792627
MMRN2	-0.697585	-0.705731	-0.409043	-0.34926	-0.734089	-0.67101	-0.746548	-0.621858	-0.183565	-0.0311482	-0.170986	-0.649977	-0.654622	-0.35085	-0.190474	-0.135269	-0.514877	-0.529004	-0.114497	-0.190343	-0.114003	-0.0495871	0.23833	0.221568	0.478715	-0.235223	-0.0218324	-0.0691379	0.302419	0.0708344	0.551229	0.720433	0.555287	0.609045	0.353194	0.335834	0.350855	0.433716	0.585026	0.535205	0.494302	0.60447	0.445451	0.781635	0.720904	0.786985	0.773616
PLTP	-0.683112	-0.707878	-0.43262	-0.355459	-0.757555	-0.708279	-0.800295	-0.555258	-0.040782	0.0510079	-0.0757192	-0.594487	-0.622078	-0.316697	-0.1789	-0.113635	-0.513949	-0.504949	-0.103775	-0.103757	-0.0294519	0.0566755	0.291394	0.243685	0.477667	-0.347557	-0.13234	-0.144092	0.235858	0.0323399	0.477374	0.665941	0.490107	0.528964	0.245589	0.30458	0.280826	0.379826	0.5357	0.494779	0.577371	0.665126	0.527017	0.78518	0.750628	0.786407	0.78759
HSD11B1	-0.695936	-0.703406	-0.399491	-0.345209	-0.731133	-0.665745	-0.734518	-0.640782	-0.221129	-0.0582457	-0.204688	-0.673953	-0.675869	-0.371759	-0.20211	-0.151294	-0.505145	-0.527296	-0.106346	-0.204414	-0.126527	-0.0695394	0.239175	0.228192	0.493242	-0.210441	-0.000570813	-0.0567898	0.309652	0.0678326	0.580844	0.739512	0.578541	0.63265	0.381395	0.344871	0.369605	0.446993	0.594715	0.54047	0.475985	0.58838	0.421041	0.787787	0.71578	0.78633	0.76921
LEPREL1	-0.70826	-0.720492	-0.489007	-0.38213	-0.751803	-0.708477	-0.842486	-0.453654	0.140193	0.203986	0.123381	-0.434649	-0.461189	-0.163223	-0.085225	0.00793589	-0.598441	-0.542754	-0.188328	-0.0719192	-0.0099497	0.118408	0.222467	0.157338	0.343716	-0.44367	-0.20054	-0.171186	0.242405	0.10183	0.28801	0.548574	0.34841	0.400286	0.108366	0.255112	0.186908	0.316563	0.498429	0.487915	0.645655	0.737423	0.652371	0.719099	0.757559	0.786304	0.805196
LEPR	-0.682269	-0.705244	-0.421578	-0.35098	-0.752849	-0.700404	-0.784681	-0.578034	-0.0870425	0.0190212	-0.11499	-0.621424	-0.644795	-0.339289	-0.190969	-0.130684	-0.504363	-0.504752	-0.0965223	-0.123296	-0.0473681	0.0300222	0.288538	0.248569	0.491748	-0.315694	-0.104099	-0.126941	0.247335	0.0320066	0.511087	0.688015	0.517029	0.557224	0.280279	0.315407	0.303752	0.396294	0.548312	0.502489	0.553717	0.64513	0.49754	0.790691	0.743386	0.785561	0.782102
ZEB2	-0.678758	-0.707206	-0.43645	-0.355994	-0.761605	-0.7153	-0.810258	-0.541298	-0.0120521	0.0668846	-0.0573642	-0.583517	-0.616017	-0.310635	-0.177214	-0.110192	-0.512078	-0.498642	-0.100372	-0.0853468	-0.0114445	0.0787564	0.303174	0.249072	0.47828	-0.370149	-0.155155	-0.159706	0.221138	0.0232327	0.462952	0.654608	0.476996	0.512446	0.223646	0.297987	0.266428	0.368415	0.524759	0.485468	0.593659	0.676425	0.54241	0.785586	0.75589	0.785181	0.789293
LTBP4	-0.684649	-0.710594	-0.452763	-0.363427	-0.761166	-0.717188	-0.824276	-0.510429	0.0440431	0.112273	0.00112185	-0.537577	-0.570989	-0.267564	-0.151412	-0.0763794	-0.534648	-0.50746	-0.122512	-0.072249	-0.00177921	0.100889	0.287384	0.226991	0.442159	-0.40179	-0.179235	-0.170881	0.219378	0.039885	0.408137	0.620119	0.43544	0.473603	0.181112	0.283014	0.237488	0.34854	0.51208	0.48143	0.616256	0.698915	0.58027	0.767891	0.759186	0.784998	0.794628
PLVAP	-0.674304	-0.70246	-0.414614	-0.346662	-0.757119	-0.705997	-0.78516	-0.584926	-0.0962183	0.0045244	-0.135708	-0.641076	-0.668568	-0.361742	-0.206289	-0.149559	-0.487827	-0.492969	-0.0787472	-0.114204	-0.0364036	0.0367367	0.310248	0.268255	0.516078	-0.3167	-0.110251	-0.134636	0.23437	0.0123395	0.533226	0.699817	0.531736	0.566883	0.287109	0.318926	0.308924	0.398405	0.546175	0.496247	0.554623	0.641323	0.487572	0.802776	0.746372	0.784597	0.780335
REM1	-0.75024	-0.716228	-0.446285	-0.37379	-0.687383	-0.611372	-0.717277	-0.585867	-0.160367	0.0469124	-0.0509903	-0.51933	-0.48744	-0.197297	-0.0826609	-0.00594773	-0.626589	-0.613894	-0.242985	-0.279663	-0.216958	-0.129821	0.0643325	0.0718158	0.299941	-0.190254	0.0565922	0.00980086	0.411716	0.221964	0.409801	0.644503	0.464027	0.557695	0.333684	0.316377	0.331497	0.430118	0.608403	0.585655	0.455966	0.605312	0.485606	0.684898	0.681564	0.784374	0.772368
CD97	-0.796377	-0.727732	-0.483618	-0.397241	-0.651762	-0.566214	-0.701444	-0.546215	-0.119635	0.127477	0.0679861	-0.39812	-0.337453	-0.0582214	0.013331	0.110584	-0.726143	-0.686521	-0.354756	-0.34612	-0.295493	-0.185025	-0.0803089	-0.0560629	0.143868	-0.167746	0.109386	0.0681045	0.498978	0.349475	0.276154	0.571762	0.375783	0.502531	0.301799	0.295633	0.305224	0.420291	0.62339	0.625615	0.43574	0.616581	0.534066	0.602495	0.653298	0.784176	0.775456
MRC1	-0.675315	-0.702048	-0.413911	-0.346551	-0.754817	-0.702923	-0.781812	-0.586812	-0.101947	0.00223844	-0.137782	-0.640904	-0.666791	-0.36047	-0.204892	-0.148287	-0.489343	-0.495045	-0.0812445	-0.11932	-0.0417071	0.0308129	0.304909	0.264677	0.512857	-0.310891	-0.104122	-0.130018	0.238861	0.0164518	0.533747	0.70045	0.532699	0.569115	0.291243	0.319738	0.311421	0.400398	0.548306	0.498468	0.550021	0.638267	0.484358	0.80049	0.743927	0.784032	0.779166
CRISPLD2	-0.678107	-0.706572	-0.438267	-0.35648	-0.760893	-0.715244	-0.811883	-0.53527	-0.00211782	0.0740721	-0.0481139	-0.575846	-0.608909	-0.304199	-0.173567	-0.105459	-0.513997	-0.498411	-0.102659	-0.0817314	-0.00840265	0.0836431	0.301963	0.246504	0.473153	-0.375869	-0.160252	-0.162456	0.219123	0.0243653	0.45399	0.648233	0.469806	0.505203	0.215797	0.295032	0.260982	0.364262	0.521335	0.483344	0.5973	0.679433	0.547941	0.782314	0.755776	0.783937	0.789029
LDB2	-0.70654	-0.716892	-0.479249	-0.377866	-0.745913	-0.699962	-0.827617	-0.47104	0.102163	0.178029	0.0920045	-0.454622	-0.47731	-0.180002	-0.0939573	-0.00488235	-0.590325	-0.542212	-0.183152	-0.0886086	-0.0255647	0.0955612	0.21806	0.15964	0.352898	-0.41618	-0.176233	-0.156032	0.252301	0.102722	0.313755	0.564816	0.368915	0.422143	0.136409	0.263271	0.205136	0.329362	0.507926	0.49366	0.624527	0.719459	0.627171	0.721202	0.749645	0.78391	0.798967
COL15A1	-0.706452	-0.701101	-0.390312	-0.34356	-0.71199	-0.638538	-0.702057	-0.668164	-0.289403	-0.0908894	-0.238954	-0.685612	-0.672157	-0.371313	-0.195783	-0.147889	-0.515786	-0.546593	-0.125	-0.25656	-0.17936	-0.131019	0.193342	0.200461	0.473142	-0.148733	0.0630752	-0.0106993	0.353543	0.102922	0.600862	0.756263	0.599551	0.665177	0.431917	0.357301	0.401373	0.472097	0.619907	0.564261	0.428746	0.556146	0.383071	0.773116	0.694338	0.783721	0.759518
MDFIC	-0.691419	-0.710906	-0.455884	-0.365866	-0.752756	-0.706428	-0.816557	-0.508335	0.0398336	0.118301	0.0121917	-0.52235	-0.549719	-0.248593	-0.137515	-0.0602451	-0.548758	-0.519226	-0.139901	-0.0883569	-0.0196858	0.0847532	0.261268	0.205733	0.417937	-0.389606	-0.163017	-0.156405	0.236918	0.0617895	0.392588	0.611975	0.426058	0.470207	0.183723	0.281632	0.238143	0.350313	0.516972	0.489499	0.606139	0.695005	0.58067	0.753855	0.751439	0.783611	0.792673
ACVRL1	-0.680456	-0.700685	-0.410233	-0.34602	-0.744864	-0.689191	-0.76627	-0.597806	-0.131677	-0.0107405	-0.150573	-0.643089	-0.661449	-0.357071	-0.199878	-0.144202	-0.495808	-0.50483	-0.0918937	-0.144033	-0.0670448	0.00202124	0.281053	0.249334	0.500152	-0.282454	-0.0743485	-0.107993	0.260205	0.0348641	0.539513	0.705887	0.53986	0.58211	0.313032	0.324629	0.324888	0.411144	0.55949	0.509586	0.527937	0.623508	0.467926	0.791531	0.733104	0.782222	0.774247
A530099J19RIK	-0.704715	-0.711715	-0.458236	-0.369284	-0.736861	-0.684947	-0.797929	-0.51396	0.0147447	0.117505	0.0177124	-0.505482	-0.520222	-0.222747	-0.116814	-0.0371849	-0.571973	-0.541628	-0.169301	-0.125417	-0.0593144	0.045259	0.212746	0.168942	0.379543	-0.355924	-0.12291	-0.12366	0.273823	0.101944	0.377458	0.606417	0.419736	0.475446	0.201907	0.283666	0.248397	0.360379	0.531593	0.508049	0.579714	0.681501	0.571299	0.731494	0.735799	0.782103	0.788388
TTC28	-0.694352	-0.714215	-0.479943	-0.375594	-0.755763	-0.715251	-0.843461	-0.45574	0.138216	0.190777	0.10362	-0.453615	-0.486845	-0.188321	-0.103286	-0.0142546	-0.575182	-0.52405	-0.164491	-0.0540827	0.00984027	0.133879	0.252568	0.182971	0.372778	-0.45108	-0.21527	-0.185455	0.22043	0.0740045	0.309394	0.557294	0.360834	0.405109	0.108877	0.256277	0.187679	0.314107	0.490223	0.475229	0.650044	0.733935	0.642978	0.73159	0.760325	0.781851	0.800687
OGN	-0.70826	-0.716173	-0.482621	-0.379357	-0.741772	-0.695732	-0.826593	-0.462822	0.11271	0.189109	0.107538	-0.43939	-0.460463	-0.164879	-0.0841898	0.00705917	-0.597999	-0.546367	-0.192561	-0.0903135	-0.0286627	0.0953855	0.206606	0.148382	0.337361	-0.418502	-0.176277	-0.153868	0.256497	0.112446	0.296833	0.553861	0.356507	0.411945	0.127785	0.259104	0.198701	0.324926	0.505554	0.494092	0.625073	0.721588	0.63404	0.711785	0.746488	0.781789	0.797828
RSPO3	-0.748535	-0.71703	-0.462425	-0.379494	-0.69092	-0.620251	-0.738565	-0.545537	-0.0843096	0.0995399	0.0144932	-0.471325	-0.445941	-0.157644	-0.0612457	0.0234359	-0.640461	-0.612261	-0.255236	-0.247802	-0.188224	-0.0870677	0.0662997	0.0615318	0.27322	-0.240308	0.0116119	-0.0169726	0.392517	0.223414	0.351227	0.60448	0.416854	0.508418	0.275547	0.296983	0.29243	0.401227	0.585221	0.570893	0.491474	0.634665	0.53145	0.671224	0.689334	0.78176	0.777353
FAM198B	-0.67532	-0.702435	-0.425415	-0.350826	-0.755273	-0.706557	-0.794499	-0.558713	-0.0509373	0.0393346	-0.090851	-0.604878	-0.633959	-0.329462	-0.187398	-0.124924	-0.50152	-0.496174	-0.0931143	-0.100852	-0.025763	0.05665	0.300827	0.253248	0.489543	-0.342421	-0.131437	-0.145271	0.229278	0.0219026	0.490486	0.67129	0.498467	0.534658	0.252061	0.306137	0.28483	0.380943	0.533331	0.489895	0.571982	0.657272	0.51553	0.788054	0.747406	0.781719	0.781916
IGSF10	-0.682022	-0.705451	-0.438714	-0.357264	-0.752985	-0.70531	-0.803214	-0.535408	-0.0103177	0.0749284	-0.0441282	-0.566625	-0.594686	-0.292129	-0.164308	-0.0951867	-0.522652	-0.506379	-0.114625	-0.0957171	-0.0236567	0.0686068	0.281796	0.230879	0.455993	-0.362757	-0.144866	-0.149576	0.233081	0.0405623	0.445457	0.64363	0.465084	0.505021	0.221218	0.294749	0.26359	0.366838	0.525567	0.489455	0.586289	0.673312	0.544179	0.771314	0.748089	0.781633	0.785786
LAMA2	-0.67569	-0.700858	-0.417047	-0.347659	-0.751358	-0.699852	-0.781839	-0.577407	-0.0887662	0.0139509	-0.121826	-0.625923	-0.651124	-0.346481	-0.196197	-0.137528	-0.495269	-0.497333	-0.0887066	-0.118039	-0.0417233	0.0338203	0.296648	0.25569	0.499371	-0.315907	-0.107372	-0.130335	0.240149	0.0234055	0.516905	0.689016	0.519887	0.557669	0.280546	0.315024	0.303659	0.394705	0.544337	0.497154	0.552453	0.641267	0.492087	0.791986	0.741487	0.781513	0.777907
MFAP4	-0.689459	-0.708175	-0.450399	-0.363215	-0.749085	-0.701597	-0.808377	-0.516237	0.0212418	0.105245	-0.00351904	-0.531863	-0.557471	-0.25701	-0.141995	-0.0668947	-0.543651	-0.517938	-0.136696	-0.0959818	-0.0268267	0.0738757	0.259472	0.207169	0.422544	-0.375932	-0.15132	-0.149159	0.240972	0.0615419	0.405115	0.619342	0.4358	0.480389	0.19716	0.285293	0.246745	0.356071	0.5208	0.491437	0.595238	0.685366	0.567517	0.754258	0.746759	0.78142	0.788604
ETS1	-0.701249	-0.710991	-0.459545	-0.36905	-0.739705	-0.689646	-0.80366	-0.506893	0.0299277	0.124716	0.0255514	-0.501713	-0.51976	-0.222116	-0.117777	-0.0375923	-0.568842	-0.536571	-0.165141	-0.113813	-0.0477045	0.0586532	0.222165	0.174473	0.382943	-0.368896	-0.136652	-0.133501	0.263833	0.0943039	0.372036	0.601459	0.414129	0.467271	0.19029	0.280362	0.240862	0.35416	0.52511	0.501979	0.589093	0.687454	0.578806	0.733245	0.739172	0.781293	0.789142
MXRA8	-0.691358	-0.712682	-0.475948	-0.373416	-0.756263	-0.715766	-0.841172	-0.461003	0.12875	0.181501	0.0913106	-0.463676	-0.497677	-0.198802	-0.109985	-0.0228475	-0.568187	-0.51994	-0.157551	-0.0537502	0.010994	0.132377	0.25927	0.190095	0.382642	-0.446861	-0.213336	-0.185571	0.217646	0.0674243	0.321263	0.564051	0.369289	0.412062	0.115884	0.258845	0.192487	0.316968	0.491085	0.474061	0.646854	0.729661	0.635389	0.736094	0.760049	0.781142	0.799066
SVEP1	-0.683994	-0.705869	-0.442055	-0.358901	-0.751217	-0.703587	-0.804179	-0.529242	-0.000807465	0.0841857	-0.0315923	-0.555486	-0.582683	-0.280979	-0.157205	-0.0862719	-0.528957	-0.509789	-0.121551	-0.0960155	-0.0249094	0.0698906	0.274413	0.223188	0.445164	-0.366334	-0.146463	-0.149115	0.235637	0.047277	0.43269	0.635745	0.455767	0.497193	0.213833	0.291684	0.258336	0.363386	0.523896	0.489907	0.588488	0.676508	0.550948	0.765448	0.747115	0.781087	0.786147
BMP4	-0.668083	-0.700144	-0.41983	-0.3472	-0.75969	-0.712431	-0.796212	-0.563496	-0.0560267	0.0282593	-0.107178	-0.621202	-0.654426	-0.34867	-0.200746	-0.141194	-0.486953	-0.48532	-0.0771675	-0.0909767	-0.0142596	0.0648688	0.321231	0.271192	0.511147	-0.345768	-0.139262	-0.153707	0.216424	0.0036761	0.508599	0.680699	0.510187	0.541599	0.25586	0.308642	0.287968	0.381733	0.530484	0.483596	0.574658	0.655313	0.508537	0.798971	0.750818	0.780996	0.780792
GPR124	-0.728078	-0.709365	-0.435245	-0.364933	-0.701033	-0.631146	-0.729105	-0.585619	-0.149045	0.0326241	-0.0761215	-0.550141	-0.532578	-0.239584	-0.114187	-0.0433097	-0.588472	-0.581299	-0.200536	-0.239778	-0.173439	-0.0911307	0.12445	0.120557	0.353577	-0.217036	0.0183341	-0.0239705	0.367401	0.169182	0.442276	0.657807	0.481737	0.560692	0.324628	0.316831	0.327048	0.422246	0.591773	0.56186	0.47564	0.609269	0.480615	0.711601	0.693736	0.780866	0.770302
EDIL3	-0.668838	-0.699712	-0.418683	-0.346876	-0.757701	-0.70967	-0.792804	-0.56626	-0.0630386	0.0246926	-0.111004	-0.622635	-0.654395	-0.349004	-0.200378	-0.141202	-0.487586	-0.486916	-0.0786637	-0.0959992	-0.0193295	0.0588311	0.317008	0.268752	0.509515	-0.339534	-0.13298	-0.149212	0.220516	0.00679606	0.510943	0.682472	0.512481	0.544939	0.261005	0.309894	0.291194	0.384211	0.532855	0.485754	0.569825	0.651872	0.504428	0.797578	0.748574	0.780553	0.779623
BMP5	-0.670266	-0.701687	-0.429697	-0.351389	-0.760056	-0.714752	-0.805963	-0.542968	-0.0183234	0.057183	-0.070307	-0.592798	-0.627564	-0.323009	-0.185788	-0.121369	-0.499117	-0.488798	-0.0888963	-0.0796716	-0.00499832	0.0819913	0.314724	0.259804	0.490762	-0.368265	-0.157613	-0.163259	0.212248	0.0111296	0.4745	0.65865	0.483835	0.516045	0.22717	0.298712	0.268523	0.367997	0.520856	0.479196	0.590653	0.670166	0.532963	0.788832	0.753549	0.780382	0.783908
LRRC17	-0.744766	-0.712445	-0.447037	-0.37268	-0.685643	-0.611597	-0.719285	-0.573852	-0.14169	0.0576729	-0.0375213	-0.507853	-0.478485	-0.190013	-0.0793883	-0.00161912	-0.624245	-0.608457	-0.241898	-0.268592	-0.206675	-0.117105	0.0682196	0.0721875	0.295781	-0.202295	0.0437613	0.00159345	0.402576	0.217894	0.396581	0.633115	0.452191	0.544001	0.318341	0.310464	0.32076	0.420978	0.599125	0.577943	0.462966	0.609201	0.493251	0.6801	0.680716	0.779693	0.769553
NTF3	-0.686807	-0.7042	-0.43668	-0.357282	-0.743706	-0.692891	-0.790217	-0.542202	-0.0318229	0.0673688	-0.0502936	-0.564198	-0.585613	-0.285109	-0.157452	-0.0884765	-0.530184	-0.515652	-0.126047	-0.116546	-0.0453843	0.0448674	0.25897	0.21511	0.441214	-0.340042	-0.120388	-0.130855	0.251852	0.0584547	0.44549	0.64509	0.467537	0.512902	0.23675	0.297633	0.272892	0.374472	0.534159	0.498777	0.568326	0.661832	0.532641	0.761372	0.73837	0.779627	0.781498
CPED1	-0.672311	-0.704293	-0.446832	-0.358333	-0.762851	-0.721768	-0.825738	-0.505866	0.051813	0.108478	-0.005803	-0.544811	-0.584023	-0.281101	-0.162126	-0.0894169	-0.51748	-0.4919	-0.105656	-0.0546257	0.0167782	0.11766	0.309798	0.244646	0.459895	-0.412652	-0.195539	-0.184611	0.199837	0.0188628	0.416201	0.620374	0.438049	0.470098	0.173919	0.280855	0.232712	0.342314	0.501819	0.468879	0.622541	0.698274	0.577455	0.773912	0.760493	0.779488	0.78999
ADAP2	-0.740985	-0.709635	-0.434755	-0.36718	-0.684484	-0.60831	-0.70705	-0.597189	-0.18561	0.0235001	-0.0810198	-0.540875	-0.509901	-0.22036	-0.097198	-0.0253059	-0.608727	-0.603213	-0.227335	-0.281048	-0.216772	-0.136595	0.0764579	0.0860164	0.319932	-0.175947	0.0647934	0.0124082	0.406444	0.208259	0.436448	0.658317	0.482726	0.573313	0.351484	0.321718	0.343106	0.436457	0.609454	0.582083	0.443828	0.591034	0.463899	0.691424	0.676773	0.779363	0.764878
HMCN2	-0.693881	-0.711677	-0.47613	-0.373854	-0.750499	-0.708603	-0.834867	-0.460915	0.123051	0.182098	0.0941384	-0.457031	-0.487528	-0.190255	-0.10345	-0.0156228	-0.574081	-0.525352	-0.165887	-0.0634861	0.000347305	0.12186	0.245082	0.179093	0.37049	-0.4376	-0.20255	-0.176529	0.227325	0.0787376	0.315132	0.560614	0.365822	0.411756	0.119582	0.258547	0.194213	0.318642	0.49387	0.478175	0.638987	0.725182	0.632607	0.728156	0.754442	0.779286	0.796554
SHANK3	-0.673208	-0.700835	-0.42772	-0.351126	-0.754185	-0.706736	-0.797046	-0.548828	-0.0347539	0.0502739	-0.0769162	-0.593365	-0.623792	-0.320431	-0.182526	-0.118548	-0.503068	-0.494488	-0.0953224	-0.0937588	-0.0195028	0.0656421	0.300692	0.250614	0.482875	-0.352201	-0.14071	-0.150661	0.224517	0.0219788	0.477037	0.661235	0.48735	0.52296	0.23916	0.301293	0.275879	0.373885	0.527067	0.485489	0.578104	0.661834	0.523887	0.783303	0.747225	0.779213	0.781016
ABCC9	-0.700323	-0.713791	-0.485381	-0.378665	-0.746574	-0.704549	-0.837916	-0.446097	0.146574	0.205851	0.126299	-0.428846	-0.456783	-0.161365	-0.084883	0.00774975	-0.59168	-0.535501	-0.184674	-0.0655382	-0.0041206	0.124015	0.225104	0.158619	0.342269	-0.446226	-0.205599	-0.174551	0.235343	0.0972117	0.282664	0.54121	0.342474	0.392634	0.101584	0.251199	0.181477	0.31066	0.490811	0.480613	0.644637	0.733909	0.650411	0.713577	0.752549	0.778972	0.798481
ELK3	-0.669401	-0.698145	-0.416287	-0.345945	-0.753314	-0.704006	-0.785991	-0.570217	-0.074859	0.0187242	-0.117177	-0.624096	-0.653262	-0.348885	-0.199324	-0.140823	-0.488263	-0.489187	-0.081335	-0.104585	-0.0281127	0.0483444	0.309137	0.264017	0.505813	-0.328434	-0.121992	-0.141244	0.227401	0.0123574	0.514071	0.684533	0.515608	0.549875	0.269414	0.311615	0.2963	0.387956	0.536284	0.488924	0.56084	0.645223	0.496889	0.794073	0.743778	0.778847	0.776686
CYGB	-0.666141	-0.697894	-0.41724	-0.345665	-0.757024	-0.709484	-0.792022	-0.564938	-0.0619036	0.0239959	-0.112033	-0.623057	-0.655651	-0.350707	-0.201802	-0.143066	-0.484348	-0.48395	-0.0759768	-0.0932477	-0.0165241	0.0612451	0.320035	0.271132	0.511641	-0.340692	-0.135228	-0.151078	0.217298	0.00357976	0.511645	0.681742	0.51233	0.54382	0.259686	0.309218	0.290175	0.382839	0.530677	0.48327	0.570027	0.650927	0.503305	0.797543	0.747844	0.778762	0.777954
PDE1A	-0.672516	-0.703186	-0.443555	-0.357057	-0.760072	-0.717754	-0.819623	-0.512465	0.0369396	0.0991866	-0.0167255	-0.551178	-0.588367	-0.285811	-0.164205	-0.0928184	-0.515884	-0.492962	-0.105351	-0.0625173	0.00915125	0.107477	0.305771	0.24361	0.461276	-0.401168	-0.184817	-0.177538	0.205323	0.0212647	0.424694	0.626008	0.445131	0.478268	0.184912	0.28393	0.2398	0.347473	0.506066	0.471983	0.613747	0.691294	0.568081	0.773656	0.757004	0.778707	0.787697
F2R	-0.657779	-0.695988	-0.413631	-0.342595	-0.76378	-0.718859	-0.798532	-0.564525	-0.0552966	0.0194755	-0.120896	-0.635408	-0.674161	-0.36768	-0.214591	-0.15799	-0.469533	-0.47102	-0.0587827	-0.0759858	0.00226502	0.0785001	0.345455	0.291447	0.533874	-0.353565	-0.15246	-0.165992	0.198693	-0.0182802	0.524264	0.687116	0.519121	0.544492	0.254749	0.309307	0.287689	0.379322	0.52387	0.473648	0.579872	0.654197	0.503097	0.809319	0.754086	0.778266	0.778253
IGFBP3	-0.689594	-0.702971	-0.434379	-0.356833	-0.737157	-0.684098	-0.78042	-0.548161	-0.0492031	0.0600095	-0.0572897	-0.564564	-0.581383	-0.28228	-0.153947	-0.0854754	-0.534099	-0.521419	-0.132764	-0.131385	-0.0606944	0.0275586	0.244034	0.205314	0.432699	-0.322891	-0.102458	-0.117477	0.2647	0.0698803	0.447998	0.647543	0.47106	0.519994	0.249335	0.300232	0.280555	0.380532	0.540482	0.505197	0.554789	0.652708	0.522781	0.755188	0.731343	0.77803	0.778076
AXL	-0.660957	-0.699365	-0.431872	-0.350232	-0.766853	-0.726082	-0.819164	-0.526741	0.0165795	0.0726887	-0.053896	-0.585641	-0.628618	-0.32367	-0.189543	-0.124209	-0.489802	-0.475428	-0.0772146	-0.0513153	0.0235296	0.114254	0.339034	0.274753	0.501052	-0.398815	-0.190603	-0.1872	0.187241	-0.00892383	0.463752	0.647851	0.471884	0.4975	0.200346	0.291135	0.251144	0.353364	0.505095	0.464005	0.612607	0.683514	0.549412	0.793837	0.761464	0.778008	0.785142
SCN7A	-0.687062	-0.704839	-0.446692	-0.361078	-0.744487	-0.696387	-0.801478	-0.518415	0.0118393	0.0990918	-0.0102466	-0.533739	-0.557943	-0.25885	-0.142659	-0.0686491	-0.540728	-0.516754	-0.136125	-0.100673	-0.031625	0.0671172	0.255791	0.205589	0.421647	-0.367262	-0.143935	-0.144075	0.243629	0.0629761	0.408791	0.620486	0.438525	0.483672	0.20331	0.286137	0.250256	0.357977	0.521544	0.4916	0.587444	0.678415	0.559543	0.751174	0.741731	0.778001	0.78421
FZD1	-0.734476	-0.703475	-0.409947	-0.356233	-0.679488	-0.598361	-0.679362	-0.644437	-0.277224	-0.0454765	-0.167871	-0.604743	-0.568907	-0.277939	-0.130292	-0.0699943	-0.579978	-0.595064	-0.201644	-0.310751	-0.242111	-0.180913	0.0866478	0.108996	0.363301	-0.118308	0.112358	0.0384689	0.418715	0.193919	0.514422	0.707807	0.543012	0.632567	0.420341	0.344385	0.389179	0.46859	0.631659	0.592355	0.401437	0.552161	0.403139	0.710727	0.666206	0.777838	0.754247
FBLN1	-0.668002	-0.701163	-0.439007	-0.354345	-0.761455	-0.719623	-0.818314	-0.517172	0.0291614	0.0896251	-0.029861	-0.562616	-0.601593	-0.298544	-0.172687	-0.103483	-0.506531	-0.486664	-0.0957779	-0.0591722	0.013511	0.109034	0.316411	0.253778	0.474284	-0.399298	-0.185934	-0.180185	0.199384	0.0112468	0.437926	0.633091	0.454124	0.484768	0.190587	0.286266	0.243812	0.349433	0.505513	0.46904	0.612244	0.687596	0.560696	0.779681	0.757567	0.77768	0.785947
SNCAIP	-0.69628	-0.707355	-0.456601	-0.366687	-0.737791	-0.688494	-0.80131	-0.504719	0.0308169	0.122902	0.0231837	-0.502352	-0.52161	-0.224973	-0.12011	-0.0407904	-0.563002	-0.531364	-0.160626	-0.109747	-0.0435918	0.0618802	0.226624	0.178112	0.386137	-0.369736	-0.139508	-0.135969	0.258731	0.0891607	0.373376	0.600102	0.413963	0.465557	0.188669	0.279213	0.23944	0.35195	0.521387	0.49771	0.588359	0.68489	0.5759	0.732532	0.737127	0.777661	0.785606
LPHN3	-0.684513	-0.701245	-0.430003	-0.354109	-0.739995	-0.687808	-0.780898	-0.552468	-0.0547716	0.0509114	-0.0703503	-0.577065	-0.596573	-0.2966	-0.16374	-0.0975171	-0.52355	-0.513861	-0.121372	-0.125387	-0.053497	0.0320887	0.258064	0.217978	0.448302	-0.323801	-0.106643	-0.122574	0.256276	0.0572123	0.462042	0.655027	0.480367	0.526041	0.253492	0.302438	0.283735	0.381794	0.539046	0.50115	0.555589	0.650449	0.516614	0.762986	0.733371	0.777468	0.777031
FGF10	-0.699715	-0.709262	-0.466366	-0.371108	-0.73736	-0.689473	-0.809595	-0.485983	0.0646586	0.150288	0.0585077	-0.474487	-0.494277	-0.198885	-0.104478	-0.020334	-0.576549	-0.536612	-0.174	-0.101859	-0.0377937	0.0751872	0.216984	0.164696	0.3642	-0.388731	-0.153976	-0.142652	0.257661	0.0992484	0.340179	0.579147	0.388776	0.442012	0.162966	0.270117	0.221927	0.339889	0.513644	0.495195	0.601858	0.69832	0.598639	0.721673	0.738953	0.777394	0.788667
ECM2	-0.753029	-0.718015	-0.484176	-0.388436	-0.686402	-0.61964	-0.755404	-0.496259	0.000146137	0.166839	0.101831	-0.400031	-0.376211	-0.0924624	-0.0224095	0.0737574	-0.670465	-0.621869	-0.28676	-0.226651	-0.172533	-0.0533124	0.0425208	0.0283246	0.217827	-0.286393	-0.0246288	-0.0337248	0.387498	0.246869	0.26734	0.549502	0.352379	0.447429	0.210309	0.272898	0.247455	0.369187	0.562876	0.561532	0.522578	0.664739	0.585073	0.641048	0.69041	0.777047	0.780928
NRP1	-0.672237	-0.695607	-0.40763	-0.343037	-0.743834	-0.690248	-0.766734	-0.590022	-0.120335	-0.00763215	-0.147384	-0.640244	-0.66201	-0.358947	-0.202542	-0.147422	-0.487222	-0.495551	-0.0844958	-0.131964	-0.0550369	0.014265	0.29142	0.256306	0.504883	-0.291657	-0.0863589	-0.116932	0.248041	0.0245739	0.536388	0.70018	0.535126	0.574052	0.303122	0.320794	0.31792	0.404166	0.55063	0.500538	0.532804	0.624117	0.469472	0.790877	0.73232	0.776971	0.770162
RAMP2	-0.661432	-0.699081	-0.434581	-0.351291	-0.765435	-0.725097	-0.82053	-0.519901	0.0274071	0.0816842	-0.0419921	-0.575328	-0.618223	-0.314153	-0.183763	-0.116874	-0.494025	-0.476898	-0.0820287	-0.0492176	0.0247919	0.117895	0.334601	0.269339	0.492478	-0.40406	-0.194518	-0.188648	0.187227	-0.00491585	0.451856	0.639934	0.462781	0.489094	0.191825	0.287756	0.245152	0.349045	0.502082	0.462849	0.615856	0.686853	0.556091	0.788813	0.760808	0.77686	0.785046
IGFBP7	-0.658429	-0.697656	-0.429378	-0.348677	-0.766254	-0.725635	-0.817244	-0.528343	0.0125761	0.0683097	-0.0595987	-0.589733	-0.633205	-0.328468	-0.1927	-0.128371	-0.485509	-0.472503	-0.0734319	-0.0505032	0.0246563	0.114023	0.342421	0.278241	0.505513	-0.396833	-0.190074	-0.187507	0.185106	-0.0125886	0.468824	0.650149	0.475227	0.49993	0.203016	0.291879	0.252851	0.354029	0.504549	0.462517	0.610685	0.680786	0.545276	0.795153	0.760509	0.776607	0.783352
MYH10	-0.737634	-0.715889	-0.484042	-0.385315	-0.701873	-0.642	-0.777082	-0.481421	0.0409414	0.177887	0.109174	-0.406714	-0.397089	-0.11058	-0.0391041	0.0560696	-0.648285	-0.597497	-0.258748	-0.182107	-0.126117	-0.00445767	0.0921587	0.0636023	0.251045	-0.330113	-0.0743954	-0.0723278	0.345329	0.205834	0.270402	0.545985	0.348604	0.431285	0.179708	0.266375	0.228673	0.352392	0.542205	0.53856	0.555514	0.683014	0.602623	0.659726	0.706464	0.77647	0.784692
CCBE1	-0.784978	-0.717895	-0.467755	-0.388319	-0.644171	-0.557579	-0.683436	-0.561618	-0.157758	0.0955931	0.0283479	-0.42369	-0.362197	-0.0848173	-0.00275563	0.0882557	-0.704938	-0.674915	-0.338141	-0.353786	-0.301554	-0.20061	-0.0721146	-0.0431084	0.164055	-0.14247	0.127113	0.0770982	0.497415	0.337324	0.309079	0.58858	0.399349	0.523724	0.32844	0.302737	0.322163	0.429924	0.626367	0.623027	0.414225	0.594112	0.502411	0.606579	0.643198	0.775993	0.76347
ARHGAP31	-0.755985	-0.716551	-0.480848	-0.387617	-0.679106	-0.609687	-0.743749	-0.504539	-0.0221959	0.156357	0.0911213	-0.402704	-0.373643	-0.0913496	-0.019694	0.0755303	-0.673885	-0.628038	-0.293321	-0.244079	-0.190322	-0.0739454	0.026406	0.0183204	0.209969	-0.265522	-0.00320988	-0.0180718	0.40215	0.25901	0.272845	0.554001	0.358403	0.457368	0.226605	0.276589	0.257539	0.377036	0.5707	0.56905	0.506255	0.653425	0.572178	0.63499	0.682394	0.775346	0.776898
ADAM19	-0.65954	-0.69638	-0.426752	-0.347792	-0.761839	-0.719685	-0.809882	-0.533751	-0.00178248	0.0608799	-0.0675468	-0.592522	-0.633031	-0.329185	-0.191993	-0.128498	-0.486383	-0.475387	-0.0762682	-0.0606079	0.014433	0.101744	0.333854	0.273317	0.502155	-0.383951	-0.177252	-0.178336	0.19321	-0.00642115	0.473553	0.653523	0.47978	0.50655	0.213439	0.294304	0.259329	0.358902	0.509083	0.466602	0.600536	0.673387	0.536532	0.792011	0.755568	0.775284	0.780542
COL1A2	-0.655576	-0.693985	-0.416189	-0.342932	-0.761845	-0.718209	-0.80063	-0.553308	-0.0376631	0.0318547	-0.10489	-0.621658	-0.661553	-0.356562	-0.208388	-0.150029	-0.471832	-0.469626	-0.0621371	-0.0690101	0.00819583	0.0875106	0.343766	0.287285	0.525016	-0.363557	-0.161749	-0.171089	0.194322	-0.0170032	0.508403	0.675338	0.506168	0.531212	0.240574	0.303778	0.277751	0.371498	0.517037	0.469054	0.58586	0.658774	0.512148	0.803024	0.753189	0.775143	0.776868
SFRP1	-0.664766	-0.698393	-0.435532	-0.352193	-0.759313	-0.717465	-0.814311	-0.519014	0.0229035	0.0839077	-0.0368873	-0.56661	-0.605626	-0.303276	-0.175659	-0.107698	-0.501618	-0.483482	-0.0921535	-0.05972	0.0131881	0.106895	0.31832	0.25639	0.477874	-0.39492	-0.183319	-0.178971	0.198108	0.00832366	0.443361	0.635225	0.457721	0.487681	0.194639	0.287055	0.246234	0.350421	0.505015	0.467542	0.608075	0.682902	0.554495	0.779688	0.754985	0.775133	0.782773
PCDH9	-0.68091	-0.705737	-0.4672	-0.367574	-0.754007	-0.714587	-0.835101	-0.463913	0.119113	0.168342	0.0739419	-0.47595	-0.512492	-0.214681	-0.120836	-0.0370798	-0.551992	-0.507931	-0.143348	-0.0477516	0.0179789	0.135074	0.273017	0.203213	0.398232	-0.443078	-0.215006	-0.189057	0.207374	0.052791	0.336606	0.569767	0.378639	0.417551	0.121638	0.260135	0.19598	0.317114	0.486815	0.466722	0.64203	0.721054	0.62254	0.740078	0.756723	0.775129	0.792136
LRRC32	-0.675632	-0.697229	-0.42244	-0.34928	-0.742576	-0.691708	-0.779674	-0.558219	-0.0639187	0.0366786	-0.0903416	-0.59493	-0.618263	-0.317609	-0.178109	-0.115446	-0.506739	-0.50169	-0.104182	-0.116745	-0.0431969	0.0380885	0.278143	0.236303	0.470703	-0.323762	-0.111947	-0.129442	0.243613	0.0384306	0.482566	0.665235	0.493723	0.534534	0.259896	0.305326	0.288369	0.38326	0.536133	0.494356	0.555107	0.645354	0.505818	0.773061	0.734716	0.775054	0.773801
TNC	-0.665495	-0.700017	-0.448457	-0.357247	-0.761691	-0.72334	-0.829884	-0.489867	0.0780394	0.123526	0.0127557	-0.52989	-0.572805	-0.271733	-0.15808	-0.0838389	-0.514659	-0.484773	-0.103929	-0.03892	0.0315231	0.13591	0.316209	0.245956	0.455251	-0.4303	-0.214062	-0.19663	0.187005	0.0127565	0.398671	0.60554	0.422354	0.451732	0.152702	0.273035	0.218048	0.330012	0.489488	0.45862	0.633412	0.704785	0.588943	0.768617	0.760561	0.774102	0.787235
BGN	-0.652962	-0.694492	-0.425768	-0.346022	-0.766155	-0.726469	-0.816079	-0.528187	0.011736	0.0639349	-0.0658288	-0.594753	-0.640218	-0.335829	-0.198053	-0.135144	-0.477384	-0.465861	-0.0658429	-0.0449412	0.0307056	0.118535	0.351207	0.285777	0.513769	-0.398324	-0.194217	-0.191559	0.177988	-0.0212436	0.474835	0.65185	0.478404	0.5007	0.202979	0.29179	0.252759	0.352728	0.501181	0.457803	0.610904	0.678445	0.541284	0.797709	0.760037	0.773884	0.78058
LSP1	-0.666115	-0.70132	-0.456518	-0.360458	-0.763644	-0.727461	-0.839939	-0.472268	0.111929	0.14774	0.0429694	-0.507914	-0.553348	-0.25288	-0.147638	-0.069558	-0.522618	-0.485563	-0.110868	-0.0258975	0.0431002	0.154045	0.315539	0.240067	0.442043	-0.452392	-0.233291	-0.207803	0.179963	0.0150735	0.371759	0.587775	0.401049	0.429973	0.12703	0.264593	0.200866	0.317625	0.480105	0.453211	0.649403	0.718579	0.610303	0.762438	0.764461	0.773843	0.790357
TMEM88	-0.683748	-0.693651	-0.402777	-0.3432	-0.724022	-0.663134	-0.737778	-0.60792	-0.172112	-0.0271596	-0.164677	-0.638199	-0.644935	-0.345946	-0.188746	-0.134302	-0.503763	-0.516776	-0.109238	-0.179922	-0.104724	-0.0405316	0.241143	0.222256	0.474201	-0.239084	-0.0298984	-0.0742165	0.290916	0.0641369	0.540219	0.70639	0.543709	0.59481	0.340953	0.328598	0.340969	0.423092	0.571555	0.522572	0.491816	0.59792	0.442084	0.770563	0.711295	0.773625	0.761354
STAB1	-0.654854	-0.690589	-0.403833	-0.337916	-0.755215	-0.707822	-0.781811	-0.578264	-0.0899284	-0.00343779	-0.147758	-0.649932	-0.684468	-0.379773	-0.220403	-0.167446	-0.46216	-0.470251	-0.0556843	-0.0924691	-0.0136742	0.0559646	0.337742	0.29046	0.538048	-0.326373	-0.128365	-0.150306	0.208797	-0.015195	0.544319	0.698823	0.535082	0.562202	0.279568	0.315575	0.303334	0.389886	0.531312	0.478179	0.557934	0.635516	0.478785	0.807265	0.743788	0.773527	0.769991
NPNT	-0.689082	-0.69745	-0.421728	-0.351541	-0.725197	-0.66771	-0.756355	-0.570685	-0.102905	0.0265945	-0.0961367	-0.585708	-0.594963	-0.29792	-0.160574	-0.0969385	-0.527714	-0.52456	-0.132039	-0.160179	-0.0887585	-0.00985269	0.227971	0.200312	0.435803	-0.280294	-0.0629382	-0.0911524	0.284578	0.0792312	0.477054	0.666136	0.495212	0.548193	0.288538	0.31061	0.30553	0.398377	0.554805	0.515597	0.521465	0.625951	0.487839	0.75207	0.71686	0.773453	0.768025
X9430020K01RIK	-0.678207	-0.703597	-0.463785	-0.365604	-0.752651	-0.713122	-0.831603	-0.467004	0.11157	0.161645	0.0655037	-0.481603	-0.518207	-0.220741	-0.124598	-0.0422048	-0.547052	-0.505027	-0.139288	-0.0486556	0.0174551	0.132537	0.275636	0.206616	0.403169	-0.43837	-0.212024	-0.187773	0.20633	0.0494728	0.343782	0.573359	0.383679	0.42187	0.126881	0.261567	0.199329	0.318921	0.487123	0.465788	0.637958	0.71653	0.616017	0.741299	0.754836	0.773375	0.789634
RECK	-0.677104	-0.702036	-0.456585	-0.362596	-0.750693	-0.7094	-0.822708	-0.481674	0.0828473	0.140877	0.0396028	-0.500257	-0.53483	-0.236992	-0.133669	-0.0546325	-0.539651	-0.503783	-0.132944	-0.0593256	0.00800701	0.117417	0.276584	0.211931	0.414628	-0.419613	-0.195926	-0.178485	0.211796	0.0470099	0.366717	0.588231	0.401701	0.440125	0.148515	0.268589	0.213759	0.329185	0.494665	0.469905	0.624204	0.704457	0.597499	0.746364	0.751211	0.77313	0.786523
AKT3	-0.708745	-0.712235	-0.494855	-0.383568	-0.731259	-0.687362	-0.829887	-0.426493	0.16657	0.23435	0.168181	-0.384473	-0.404528	-0.114621	-0.0535149	0.0454516	-0.618426	-0.552881	-0.217689	-0.0808201	-0.0237587	0.112002	0.181229	0.118682	0.290792	-0.442421	-0.193984	-0.159367	0.257052	0.134185	0.234408	0.511244	0.3085	0.367782	0.0845723	0.24102	0.167823	0.302141	0.488996	0.487214	0.638372	0.735541	0.665528	0.682692	0.739857	0.77311	0.794352
GPX3	-0.665793	-0.69605	-0.430754	-0.350396	-0.752556	-0.708389	-0.802576	-0.528054	-0.00056933	0.0709717	-0.0511243	-0.572516	-0.607166	-0.306163	-0.17574	-0.109393	-0.501607	-0.487038	-0.09521	-0.0749844	-0.00212466	0.0879728	0.306446	0.250131	0.474435	-0.374546	-0.163483	-0.16504	0.209874	0.0165153	0.452556	0.641422	0.466041	0.498866	0.211663	0.291135	0.25687	0.358256	0.511952	0.473444	0.591991	0.670784	0.539773	0.775568	0.747292	0.772851	0.778071
GREM1	-0.673975	-0.69854	-0.441487	-0.356113	-0.747147	-0.702497	-0.804978	-0.511466	0.0248274	0.0980854	-0.0140254	-0.539304	-0.570274	-0.2716	-0.153282	-0.081297	-0.523132	-0.499997	-0.118449	-0.079546	-0.00959915	0.0880825	0.280718	0.224534	0.439894	-0.382411	-0.16458	-0.160828	0.221253	0.0400358	0.414547	0.618927	0.438985	0.477333	0.192178	0.282865	0.24293	0.349743	0.509346	0.477356	0.596895	0.679979	0.559589	0.757591	0.74422	0.77243	0.780046
GPR182	-0.750112	-0.712617	-0.473985	-0.383614	-0.677843	-0.608501	-0.738265	-0.510985	-0.0362524	0.142635	0.0733302	-0.415829	-0.387687	-0.105654	-0.0288444	0.0634747	-0.662668	-0.621061	-0.283238	-0.243764	-0.189011	-0.0767295	0.0349766	0.0277568	0.22284	-0.258124	0.000397582	-0.0175244	0.397924	0.249748	0.288919	0.562241	0.369545	0.466348	0.23649	0.279646	0.264028	0.380432	0.570845	0.566364	0.499898	0.645416	0.55969	0.639454	0.680014	0.772406	0.772587
SH2D3C	-0.78087	-0.715423	-0.471361	-0.388642	-0.643619	-0.559404	-0.688871	-0.545585	-0.130304	0.113109	0.0502059	-0.406537	-0.348022	-0.0721588	0.00363016	0.0968987	-0.705988	-0.670856	-0.339761	-0.340064	-0.28898	-0.18367	-0.069101	-0.0448593	0.156019	-0.160343	0.109669	0.0663302	0.487451	0.334826	0.288701	0.573027	0.382119	0.504817	0.306713	0.294932	0.307264	0.418076	0.615519	0.614878	0.425829	0.602399	0.516458	0.60061	0.644074	0.772243	0.762461
SERPING1	-0.661358	-0.698577	-0.450475	-0.35708	-0.763697	-0.727548	-0.835954	-0.479393	0.0983026	0.134423	0.0254393	-0.521771	-0.568228	-0.267514	-0.15699	-0.081661	-0.512313	-0.479391	-0.100989	-0.0255083	0.0445949	0.151674	0.324684	0.249905	0.455612	-0.445931	-0.230238	-0.207708	0.175962	0.00581386	0.388301	0.596899	0.412736	0.439535	0.136948	0.26804	0.207573	0.321468	0.480986	0.451238	0.644269	0.711883	0.59899	0.76817	0.76341	0.772209	0.787403
TM4SF1	-0.655388	-0.693924	-0.427788	-0.347161	-0.761485	-0.721042	-0.812776	-0.524124	0.0143672	0.0699891	-0.0564206	-0.583836	-0.626747	-0.323912	-0.189844	-0.125441	-0.484486	-0.470898	-0.0748753	-0.0506749	0.0238324	0.113275	0.338393	0.274619	0.499925	-0.395102	-0.188971	-0.186036	0.18504	-0.0106084	0.463247	0.644762	0.470474	0.495493	0.200442	0.289613	0.250397	0.351418	0.501555	0.460268	0.607547	0.677618	0.543691	0.789246	0.755952	0.772202	0.779084
X9330159F19RIK	-0.700727	-0.703222	-0.453457	-0.365953	-0.722143	-0.668904	-0.781535	-0.509506	0.0058689	0.115911	0.0196224	-0.493139	-0.503238	-0.210732	-0.107979	-0.028475	-0.57318	-0.542881	-0.177666	-0.136923	-0.0725543	0.0308131	0.192927	0.15379	0.36118	-0.339724	-0.107294	-0.110597	0.283475	0.114924	0.367284	0.596859	0.412192	0.471306	0.205708	0.280836	0.248864	0.359425	0.530154	0.508317	0.563287	0.668381	0.561047	0.714505	0.721196	0.771911	0.777154
APOE	-0.659387	-0.693825	-0.425902	-0.347201	-0.755993	-0.713094	-0.803762	-0.531749	-0.00462516	0.061744	-0.0647027	-0.585933	-0.624095	-0.322159	-0.186892	-0.123018	-0.489118	-0.477646	-0.0817172	-0.066492	0.00770451	0.0950314	0.32359	0.265176	0.492431	-0.377387	-0.170184	-0.172197	0.198847	0.00109063	0.467502	0.648985	0.47561	0.50437	0.214598	0.29307	0.25929	0.35868	0.509255	0.467869	0.594126	0.668944	0.533783	0.784438	0.749895	0.77191	0.776812
TMTC1	-0.696697	-0.706587	-0.476051	-0.373852	-0.734625	-0.690175	-0.818987	-0.455298	0.116256	0.187372	0.105996	-0.435779	-0.458727	-0.166471	-0.0862213	0.00352999	-0.58645	-0.535447	-0.185334	-0.082649	-0.0214283	0.101127	0.211871	0.152342	0.338891	-0.419107	-0.181077	-0.157536	0.246814	0.104381	0.294694	0.546975	0.352268	0.40505	0.122411	0.255114	0.193922	0.318632	0.496194	0.484339	0.621581	0.714625	0.627753	0.70589	0.739287	0.771676	0.78805
FZD4	-0.690487	-0.700135	-0.444294	-0.360373	-0.728815	-0.677333	-0.782995	-0.519661	-0.00696004	0.0959016	-0.00911131	-0.520918	-0.536706	-0.242056	-0.1293	-0.0546374	-0.55093	-0.527196	-0.153281	-0.124581	-0.0575497	0.0400297	0.223117	0.181167	0.395231	-0.341374	-0.115812	-0.121288	0.265915	0.0878807	0.398382	0.613891	0.433051	0.485262	0.215488	0.286041	0.256359	0.362791	0.527825	0.500276	0.565072	0.663782	0.547788	0.731999	0.726083	0.77142	0.775542
ADAMTS10	-0.690652	-0.70115	-0.45056	-0.36281	-0.730759	-0.681116	-0.791358	-0.505741	0.0202259	0.114897	0.0144238	-0.504132	-0.522213	-0.227939	-0.121642	-0.0440287	-0.556594	-0.527262	-0.157982	-0.113447	-0.0474824	0.0552332	0.223818	0.177481	0.385855	-0.359539	-0.13189	-0.130869	0.259474	0.0886876	0.377683	0.600123	0.416525	0.468091	0.194919	0.279381	0.242643	0.352838	0.520115	0.495581	0.578278	0.674943	0.564772	0.727734	0.729546	0.77127	0.778112
CP	-0.676997	-0.69811	-0.442158	-0.35688	-0.742065	-0.69604	-0.799559	-0.511443	0.0198524	0.0992036	-0.010678	-0.532745	-0.560326	-0.263014	-0.146751	-0.0739571	-0.529505	-0.505741	-0.126903	-0.0889789	-0.0199048	0.0781023	0.266909	0.21373	0.427983	-0.373972	-0.154414	-0.152232	0.23085	0.0512831	0.408307	0.615677	0.4355	0.476992	0.195497	0.28263	0.2445	0.351434	0.512313	0.481685	0.589883	0.676337	0.557671	0.750219	0.739328	0.771186	0.778224
IGFBP5	-0.673699	-0.696794	-0.436813	-0.35417	-0.743543	-0.697367	-0.796869	-0.520181	0.00515797	0.085379	-0.0290935	-0.548287	-0.576818	-0.278636	-0.156624	-0.0865307	-0.520178	-0.500704	-0.117218	-0.0893259	-0.0189707	0.0751838	0.276413	0.224023	0.442663	-0.367493	-0.150939	-0.15198	0.227706	0.0422439	0.426428	0.626586	0.448697	0.488214	0.20666	0.286927	0.252271	0.356421	0.514608	0.480963	0.585395	0.670591	0.546856	0.757602	0.73964	0.771168	0.776789
COL12A1	-0.650201	-0.692651	-0.428459	-0.346319	-0.765344	-0.727286	-0.819619	-0.516465	0.0314084	0.0768299	-0.0495807	-0.581688	-0.629059	-0.325887	-0.192861	-0.128237	-0.478663	-0.463354	-0.0677049	-0.0356655	0.0390724	0.13012	0.352303	0.283632	0.506939	-0.410715	-0.206156	-0.198743	0.171473	-0.0221686	0.459437	0.64022	0.465528	0.486851	0.187361	0.286065	0.241992	0.344203	0.493488	0.452193	0.618826	0.684213	0.5514	0.792755	0.760286	0.771043	0.779698
ESAM	-0.671769	-0.695994	-0.435126	-0.353112	-0.74428	-0.698396	-0.796716	-0.521653	0.00296356	0.0820429	-0.0337995	-0.552581	-0.581999	-0.283601	-0.160007	-0.0907342	-0.516365	-0.497978	-0.113242	-0.0873694	-0.0166131	0.0765483	0.281121	0.228326	0.447969	-0.367505	-0.152154	-0.153576	0.22483	0.0378942	0.431326	0.629112	0.451926	0.490325	0.208242	0.28767	0.253432	0.356857	0.514053	0.479493	0.58536	0.669508	0.544411	0.760097	0.740085	0.770757	0.776183
FBXL7	-0.666545	-0.691862	-0.418466	-0.345603	-0.742072	-0.693273	-0.779593	-0.552734	-0.0562936	0.0361868	-0.0919919	-0.596273	-0.623323	-0.323714	-0.183464	-0.122069	-0.49565	-0.49103	-0.0941236	-0.104596	-0.0307566	0.0497657	0.291248	0.246159	0.47949	-0.331466	-0.123255	-0.138485	0.23047	0.0255903	0.484284	0.662457	0.492504	0.529424	0.252833	0.302628	0.283403	0.377566	0.527846	0.485071	0.558979	0.644583	0.50463	0.774508	0.734151	0.769872	0.769427
GLP2R	-0.676549	-0.693924	-0.424807	-0.349999	-0.733389	-0.681952	-0.773421	-0.547835	-0.0551623	0.0485208	-0.0724194	-0.574094	-0.594082	-0.296869	-0.164339	-0.0992619	-0.515955	-0.506992	-0.117535	-0.122563	-0.051114	0.0330668	0.258858	0.21878	0.447447	-0.321081	-0.106815	-0.122712	0.251651	0.0536496	0.460517	0.650138	0.477597	0.522036	0.25168	0.29988	0.28149	0.37818	0.533271	0.495172	0.550482	0.643649	0.510292	0.757243	0.726661	0.769654	0.769146
NPR2	-0.685865	-0.704819	-0.481517	-0.373677	-0.74464	-0.706468	-0.839385	-0.430557	0.169712	0.213715	0.134987	-0.421366	-0.455434	-0.162496	-0.0883137	0.0037257	-0.577432	-0.519315	-0.172567	-0.0432855	0.017841	0.147026	0.242804	0.169935	0.348843	-0.464258	-0.228285	-0.191086	0.213487	0.0796612	0.274242	0.529188	0.331848	0.376201	0.0816778	0.243552	0.16752	0.297137	0.474276	0.464187	0.654436	0.73608	0.655054	0.711435	0.751245	0.769503	0.791376
ANXA6	-0.688994	-0.701715	-0.462155	-0.366827	-0.73385	-0.688252	-0.807371	-0.476415	0.0760247	0.152964	0.061573	-0.469998	-0.493197	-0.200133	-0.106846	-0.0235498	-0.565866	-0.525353	-0.165872	-0.0892006	-0.0254114	0.0874348	0.226839	0.171261	0.367811	-0.396831	-0.165723	-0.1513	0.244388	0.0884167	0.335851	0.571388	0.382644	0.43231	0.152304	0.265301	0.214073	0.331632	0.502888	0.484309	0.604821	0.696615	0.598224	0.718598	0.735689	0.769443	0.781868
MIR145A	-0.724253	-0.713802	-0.510328	-0.392302	-0.71369	-0.666843	-0.822622	-0.402262	0.193721	0.2742	0.226068	-0.32566	-0.334699	-0.0509059	-0.0105263	0.0976223	-0.658671	-0.580052	-0.264594	-0.103214	-0.0518576	0.094951	0.12099	0.0638601	0.221136	-0.438399	-0.177873	-0.138482	0.289065	0.186394	0.169613	0.473011	0.263765	0.336114	0.0625276	0.22851	0.150495	0.292466	0.489529	0.499291	0.632259	0.741075	0.689143	0.643529	0.725903	0.769067	0.792676
PLXDC2	-0.657894	-0.69155	-0.426873	-0.347059	-0.752526	-0.710082	-0.802419	-0.524612	0.00412476	0.0689159	-0.0547484	-0.575688	-0.613609	-0.313299	-0.181513	-0.116545	-0.491241	-0.477547	-0.0855548	-0.0647577	0.00852436	0.0975392	0.318777	0.259788	0.48378	-0.380403	-0.172692	-0.172717	0.198425	0.00455831	0.456319	0.640567	0.46673	0.496031	0.207082	0.289451	0.253673	0.354137	0.505358	0.465631	0.594905	0.669637	0.537626	0.777907	0.74707	0.768686	0.774421
FAT4	-0.676844	-0.701805	-0.474733	-0.369207	-0.749762	-0.713416	-0.841363	-0.435823	0.164197	0.200716	0.115775	-0.440542	-0.479676	-0.185334	-0.10425	-0.0157074	-0.559716	-0.505972	-0.153307	-0.0310131	0.0320342	0.157326	0.26745	0.191512	0.374637	-0.468613	-0.2381	-0.201484	0.197665	0.057572	0.295538	0.540025	0.345488	0.384017	0.0857091	0.246319	0.170898	0.29772	0.470446	0.456258	0.657778	0.733723	0.646781	0.72428	0.755186	0.768332	0.789782
PCDH7	-0.661709	-0.69176	-0.427549	-0.348038	-0.747912	-0.70386	-0.797027	-0.526188	-0.00306448	0.0687227	-0.0531035	-0.57076	-0.605039	-0.305794	-0.175513	-0.109859	-0.497938	-0.483998	-0.0940516	-0.0754346	-0.00289917	0.0861618	0.304755	0.249147	0.472656	-0.3707	-0.161136	-0.163275	0.209062	0.0161557	0.451891	0.63891	0.464853	0.49749	0.212283	0.290014	0.256596	0.35701	0.509546	0.470961	0.587279	0.665735	0.534935	0.771411	0.742533	0.768221	0.77316
C1QC	-0.644983	-0.684668	-0.397963	-0.333341	-0.754512	-0.708929	-0.779924	-0.576041	-0.0885295	-0.00892863	-0.155793	-0.656112	-0.694218	-0.390444	-0.228481	-0.17768	-0.44853	-0.458561	-0.043259	-0.0818465	-0.00241034	0.0650745	0.352354	0.302563	0.550558	-0.330407	-0.13687	-0.157983	0.195901	-0.0297476	0.551884	0.699642	0.538279	0.561235	0.277167	0.314448	0.301504	0.386307	0.524323	0.469266	0.559092	0.632061	0.473274	0.810381	0.742618	0.768156	0.764813
ADAMDEC1	-0.662661	-0.688287	-0.407554	-0.340513	-0.739175	-0.68849	-0.7673	-0.571375	-0.0936974	0.00761735	-0.127869	-0.622089	-0.647293	-0.347473	-0.197218	-0.140746	-0.482657	-0.486578	-0.082884	-0.116129	-0.0405508	0.0320016	0.295821	0.255898	0.497347	-0.307685	-0.10405	-0.128033	0.234611	0.0189719	0.51607	0.682046	0.51682	0.553072	0.280648	0.311527	0.301878	0.390141	0.53602	0.488309	0.541054	0.627779	0.478911	0.781719	0.728958	0.768138	0.763972
EFCC1	-0.691708	-0.690335	-0.401983	-0.344064	-0.705544	-0.639843	-0.716167	-0.610825	-0.19613	-0.0295442	-0.161083	-0.621144	-0.616357	-0.322286	-0.169947	-0.113992	-0.521063	-0.533816	-0.134389	-0.213029	-0.140446	-0.0769929	0.196426	0.188533	0.438164	-0.205934	0.00759396	-0.043665	0.322802	0.099512	0.525648	0.698747	0.536573	0.597757	0.357216	0.329187	0.349499	0.430626	0.582092	0.536603	0.464182	0.581404	0.429579	0.746651	0.692972	0.767901	0.752961
STARD9	-0.702141	-0.694045	-0.417512	-0.352085	-0.699844	-0.634147	-0.72228	-0.58591	-0.15567	0.010315	-0.107432	-0.574777	-0.566235	-0.275035	-0.139743	-0.0758137	-0.549735	-0.550034	-0.164679	-0.21495	-0.146288	-0.071715	0.165051	0.155822	0.392603	-0.221896	0.000771914	-0.041757	0.334767	0.128808	0.471998	0.666645	0.497842	0.565638	0.32636	0.316872	0.327805	0.416934	0.576505	0.540055	0.474918	0.596782	0.459958	0.723372	0.690662	0.76766	0.756592
CCM2L	-0.730438	-0.697575	-0.419936	-0.358584	-0.670422	-0.59256	-0.683866	-0.607158	-0.220906	-0.00234425	-0.110928	-0.554001	-0.519568	-0.234161	-0.104568	-0.0375556	-0.593499	-0.595507	-0.219598	-0.29422	-0.229665	-0.157572	0.0710554	0.0871408	0.32502	-0.146664	0.0880716	0.0272795	0.411421	0.206758	0.456516	0.666393	0.497105	0.58797	0.374935	0.325897	0.356969	0.443852	0.611535	0.58081	0.417618	0.566211	0.433489	0.685129	0.660811	0.767647	0.749551
ERG	-0.698255	-0.694079	-0.42182	-0.352951	-0.704936	-0.642275	-0.733458	-0.572227	-0.126206	0.0265107	-0.088927	-0.564451	-0.561082	-0.269521	-0.138471	-0.0727172	-0.548074	-0.543866	-0.160962	-0.195889	-0.127528	-0.0487292	0.177923	0.162004	0.394193	-0.245628	-0.0230453	-0.0581778	0.319594	0.119089	0.458021	0.655883	0.485102	0.549333	0.304089	0.310461	0.313335	0.405605	0.565758	0.530871	0.492392	0.609116	0.476259	0.724869	0.696976	0.767243	0.759186
FYN	-0.674722	-0.695904	-0.447235	-0.358111	-0.739642	-0.695568	-0.803939	-0.493566	0.0489093	0.120147	0.0163327	-0.510104	-0.539344	-0.244139	-0.136069	-0.0601457	-0.534792	-0.504764	-0.133455	-0.0782967	-0.0109274	0.0924176	0.263336	0.206198	0.412872	-0.39056	-0.169308	-0.160255	0.224772	0.0544809	0.381958	0.596757	0.414293	0.455582	0.172436	0.27385	0.228447	0.339103	0.502021	0.475199	0.600271	0.684806	0.573563	0.740327	0.738652	0.767161	0.777064
EDNRA	-0.646058	-0.687389	-0.418302	-0.341295	-0.758745	-0.718738	-0.804913	-0.530377	-0.00160486	0.0532256	-0.0780721	-0.599011	-0.643477	-0.341556	-0.201356	-0.140735	-0.468678	-0.460295	-0.0611941	-0.0485541	0.0270852	0.111338	0.350042	0.286965	0.51594	-0.386619	-0.185875	-0.186333	0.177853	-0.0235498	0.48222	0.653375	0.48307	0.504905	0.211125	0.292504	0.257185	0.354215	0.499841	0.455057	0.599478	0.666811	0.527612	0.793655	0.75186	0.766778	0.772101
FOXF1	-0.652272	-0.691844	-0.440002	-0.350876	-0.760198	-0.724056	-0.826226	-0.487987	0.0773353	0.114571	0.000129715	-0.539198	-0.586531	-0.286782	-0.16922	-0.0980973	-0.496116	-0.469284	-0.0872574	-0.0260789	0.0452603	0.146317	0.335015	0.261931	0.472167	-0.43367	-0.223559	-0.205651	0.170695	-0.00628255	0.41021	0.607547	0.427808	0.451805	0.151374	0.272032	0.216804	0.326087	0.480831	0.447198	0.633381	0.698894	0.579902	0.772663	0.75832	0.766712	0.779841
LRRC8C	-0.641759	-0.684846	-0.407104	-0.336124	-0.758871	-0.717338	-0.79526	-0.551032	-0.0393888	0.0225115	-0.117638	-0.629976	-0.673888	-0.370728	-0.218865	-0.1637	-0.453098	-0.454025	-0.0460129	-0.0571635	0.0207866	0.0965759	0.360902	0.302029	0.540427	-0.365291	-0.169772	-0.178913	0.178748	-0.0350566	0.519218	0.676504	0.511045	0.530965	0.239704	0.302515	0.276603	0.367469	0.508146	0.457508	0.584144	0.651445	0.501874	0.805479	0.749459	0.766637	0.768243
PLXND1	-0.655259	-0.690187	-0.429541	-0.347418	-0.752689	-0.711915	-0.806751	-0.513793	0.0232632	0.0810003	-0.0398067	-0.564359	-0.60448	-0.305024	-0.177431	-0.110902	-0.491965	-0.474761	-0.0864037	-0.0549689	0.0175876	0.109647	0.321516	0.259099	0.478899	-0.393232	-0.18519	-0.180549	0.191288	0.00242302	0.442696	0.630253	0.455185	0.483226	0.192059	0.284209	0.243449	0.346064	0.498	0.460067	0.603456	0.67581	0.54765	0.774426	0.748209	0.766507	0.77416
KLHL4	-0.746495	-0.715764	-0.518209	-0.399532	-0.688389	-0.633398	-0.796837	-0.402775	0.169157	0.284935	0.250223	-0.286847	-0.276285	0.00116847	0.0288603	0.142814	-0.700951	-0.617423	-0.316594	-0.157929	-0.111536	0.0387546	0.0405212	0.00016718	0.151145	-0.393761	-0.121207	-0.0899646	0.346495	0.253855	0.131219	0.454972	0.242707	0.333919	0.0797712	0.227658	0.158868	0.302911	0.508985	0.527217	0.596563	0.725618	0.684281	0.603502	0.701993	0.766422	0.787129
CHSY3	-0.684169	-0.690164	-0.411847	-0.346277	-0.714793	-0.655333	-0.738891	-0.580144	-0.132229	0.00713915	-0.118313	-0.595316	-0.600722	-0.306429	-0.164429	-0.104071	-0.519883	-0.522298	-0.129499	-0.174206	-0.102659	-0.0296273	0.219585	0.197948	0.436833	-0.255565	-0.0415485	-0.0768959	0.292729	0.0823334	0.491793	0.673279	0.506602	0.561084	0.308712	0.314717	0.317735	0.405926	0.559195	0.517765	0.500366	0.60745	0.465214	0.746924	0.705032	0.766379	0.757942
ITGA9	-0.656989	-0.691385	-0.436702	-0.350494	-0.752947	-0.71354	-0.813747	-0.499131	0.0502221	0.101802	-0.0132675	-0.543903	-0.58506	-0.286453	-0.166571	-0.0965214	-0.500913	-0.477456	-0.0950266	-0.0470731	0.0240071	0.121731	0.316581	0.250719	0.464066	-0.409251	-0.198163	-0.187239	0.188534	0.00802722	0.418141	0.614443	0.436254	0.464943	0.171564	0.277116	0.229561	0.336291	0.491227	0.457073	0.614869	0.686489	0.565221	0.767093	0.750168	0.766151	0.776468
CCDC3	-0.657614	-0.68561	-0.404278	-0.338107	-0.73966	-0.689907	-0.766807	-0.571472	-0.0942732	0.00342498	-0.133989	-0.627442	-0.654717	-0.355028	-0.202705	-0.147593	-0.474847	-0.480205	-0.0753026	-0.110428	-0.0343114	0.0368003	0.304973	0.263695	0.505985	-0.309665	-0.108541	-0.132366	0.22748	0.01021	0.522298	0.684114	0.520225	0.554053	0.28056	0.311586	0.301838	0.388989	0.532909	0.483834	0.541855	0.626021	0.475439	0.784852	0.729076	0.765954	0.76177
SEMA3F	-0.640083	-0.683499	-0.40448	-0.334715	-0.758002	-0.71626	-0.792525	-0.554178	-0.046307	0.016734	-0.124923	-0.63505	-0.678857	-0.375833	-0.221957	-0.167893	-0.449506	-0.452179	-0.0429843	-0.0585434	0.0197519	0.0938593	0.362689	0.304626	0.544495	-0.360979	-0.166715	-0.177438	0.178529	-0.0373408	0.525555	0.680003	0.515665	0.53515	0.244675	0.303998	0.279846	0.369442	0.508994	0.457308	0.580647	0.647801	0.496459	0.80677	0.748128	0.765646	0.766566
MAPK12	-0.715457	-0.695996	-0.428819	-0.358915	-0.686281	-0.617658	-0.715307	-0.570993	-0.141271	0.0372141	-0.0674745	-0.532973	-0.515027	-0.228207	-0.107599	-0.0370161	-0.581163	-0.572477	-0.201141	-0.236025	-0.171546	-0.0893824	0.116995	0.113219	0.339963	-0.214271	0.0178176	-0.0226471	0.36247	0.170467	0.426292	0.640619	0.467106	0.545599	0.314556	0.309053	0.317988	0.412374	0.579735	0.551669	0.467263	0.599128	0.475039	0.694212	0.679578	0.765537	0.755636
RARRES2	-0.65273	-0.690469	-0.437064	-0.349745	-0.756432	-0.718963	-0.819451	-0.493517	0.063349	0.10662	-0.00876019	-0.543236	-0.588125	-0.289099	-0.169692	-0.0996014	-0.495722	-0.471103	-0.0885856	-0.0347827	0.0365852	0.135425	0.32867	0.258814	0.470847	-0.421806	-0.212125	-0.197715	0.177262	-0.00200601	0.416226	0.611554	0.433117	0.458661	0.161544	0.274544	0.223195	0.330767	0.484888	0.450536	0.624048	0.691766	0.571073	0.77065	0.753972	0.765429	0.777121
GLI1	-0.712869	-0.693816	-0.419226	-0.354688	-0.684926	-0.614468	-0.705158	-0.589526	-0.176549	0.0102992	-0.10155	-0.558488	-0.538918	-0.251358	-0.121028	-0.0550018	-0.569618	-0.568994	-0.190519	-0.246883	-0.18062	-0.105845	0.1221	0.123057	0.357882	-0.192581	0.0355094	-0.0132058	0.366567	0.164028	0.457241	0.660301	0.490962	0.568822	0.341159	0.317971	0.335869	0.424847	0.588287	0.555461	0.451457	0.584455	0.45168	0.702496	0.676038	0.765244	0.751845
DKK3	-0.695028	-0.701264	-0.473275	-0.371999	-0.724285	-0.678664	-0.807516	-0.452599	0.109458	0.18663	0.107963	-0.426568	-0.445791	-0.156933	-0.0791433	0.0107309	-0.588814	-0.537693	-0.192626	-0.0921628	-0.0322274	0.0896577	0.196161	0.14028	0.32459	-0.40695	-0.16884	-0.147286	0.25522	0.115232	0.286905	0.540315	0.346791	0.402471	0.125653	0.253336	0.19465	0.318508	0.496096	0.485629	0.609666	0.705611	0.620925	0.693585	0.729063	0.765105	0.780684
KCTD12B	-0.699398	-0.695885	-0.440856	-0.36035	-0.706949	-0.64927	-0.755013	-0.52843	-0.0450608	0.0856418	-0.0143618	-0.508125	-0.509898	-0.220724	-0.110946	-0.0357431	-0.568297	-0.54649	-0.180001	-0.166635	-0.102162	-0.00747219	0.171961	0.144258	0.357924	-0.29643	-0.0667818	-0.0827291	0.304702	0.12778	0.389981	0.610594	0.431445	0.495374	0.24212	0.289323	0.271474	0.375267	0.542808	0.51804	0.528342	0.640497	0.526768	0.706416	0.70379	0.764884	0.764892
GNAI1	-0.760366	-0.703797	-0.44869	-0.375345	-0.644183	-0.561068	-0.675603	-0.568171	-0.174075	0.0664868	-0.0117785	-0.455994	-0.402905	-0.126446	-0.0317609	0.0513463	-0.665016	-0.644495	-0.300445	-0.332797	-0.277654	-0.186124	-0.0305155	-0.00549835	0.208049	-0.141909	0.11462	0.0620763	0.467211	0.296237	0.347609	0.60401	0.422663	0.536061	0.338001	0.305869	0.328428	0.428975	0.614943	0.603825	0.410321	0.579228	0.476872	0.621954	0.640752	0.76464	0.750659
QK	-0.649964	-0.689384	-0.437691	-0.349356	-0.75751	-0.721291	-0.822501	-0.488122	0.0737177	0.111717	-0.00297715	-0.539699	-0.586667	-0.287848	-0.169801	-0.0993189	-0.493543	-0.467536	-0.0861371	-0.0271706	0.0440869	0.144135	0.334155	0.261802	0.472085	-0.430094	-0.221008	-0.203952	0.170691	-0.00666041	0.41164	0.607343	0.428571	0.452487	0.153413	0.271972	0.217788	0.326216	0.480115	0.446173	0.629728	0.695193	0.575812	0.770789	0.755439	0.764169	0.776921
LIX1L	-0.643303	-0.687842	-0.43386	-0.346556	-0.762874	-0.728478	-0.82665	-0.490143	0.0747372	0.10502	-0.0139604	-0.552565	-0.604181	-0.303979	-0.181464	-0.113174	-0.480717	-0.457134	-0.0714318	-0.0149395	0.0577479	0.155748	0.354781	0.278965	0.491774	-0.437743	-0.232481	-0.214582	0.15665	-0.0245543	0.42532	0.61407	0.43685	0.455903	0.152743	0.273181	0.218025	0.325037	0.475941	0.439218	0.635762	0.696228	0.573057	0.781232	0.76014	0.763979	0.776943
DSE	-0.651962	-0.684359	-0.409748	-0.338948	-0.743999	-0.698149	-0.779441	-0.551515	-0.0546844	0.0261923	-0.107147	-0.610176	-0.643608	-0.344322	-0.198728	-0.14095	-0.47355	-0.472471	-0.0724363	-0.0865072	-0.0111881	0.0657539	0.318352	0.268727	0.50392	-0.339625	-0.138471	-0.15245	0.208795	-6.92e-05	0.500242	0.667091	0.500674	0.5304	0.25015	0.302097	0.281708	0.373097	0.517941	0.471509	0.563148	0.641007	0.496675	0.783475	0.735181	0.763705	0.763539
SPARCL1	-0.682189	-0.701698	-0.48941	-0.375595	-0.741793	-0.706791	-0.847098	-0.403142	0.215189	0.24592	0.176232	-0.387443	-0.424515	-0.134555	-0.0727152	0.0240739	-0.584949	-0.517239	-0.181638	-0.025626	0.033004	0.170416	0.239144	0.159764	0.327189	-0.491053	-0.252616	-0.204614	0.202957	0.083174	0.234516	0.500613	0.299713	0.343366	0.0457349	0.230127	0.14263	0.27801	0.458184	0.453783	0.671553	0.749834	0.680001	0.69736	0.751068	0.763703	0.790073
IFITM3	-0.644636	-0.680298	-0.391855	-0.3306	-0.744813	-0.696746	-0.764804	-0.584168	-0.113842	-0.0226331	-0.170294	-0.660079	-0.693106	-0.391707	-0.227364	-0.178351	-0.447903	-0.461663	-0.0471815	-0.0988071	-0.019714	0.0437613	0.337461	0.29408	0.544328	-0.306975	-0.114371	-0.141884	0.208832	-0.0198858	0.559675	0.704104	0.545421	0.571666	0.29493	0.31795	0.312215	0.393807	0.530611	0.474719	0.539766	0.617087	0.456098	0.803143	0.731967	0.763554	0.757579
SUSD2	-0.661067	-0.693857	-0.458822	-0.359638	-0.752509	-0.717653	-0.834884	-0.450939	0.137123	0.16847	0.0719827	-0.477311	-0.521897	-0.226557	-0.131627	-0.0504303	-0.528357	-0.484862	-0.122143	-0.021084	0.0451464	0.160881	0.300772	0.2238	0.416011	-0.460398	-0.240027	-0.20883	0.178793	0.0254631	0.3386	0.56249	0.374635	0.405186	0.105099	0.253742	0.184323	0.304076	0.468281	0.446284	0.650705	0.719644	0.620713	0.742322	0.755199	0.76351	0.782413
ZEB1	-0.666253	-0.696125	-0.468948	-0.364553	-0.75059	-0.71648	-0.841319	-0.433213	0.167839	0.195566	0.107616	-0.448003	-0.491701	-0.197885	-0.113853	-0.0275777	-0.544627	-0.492803	-0.138775	-0.0174914	0.0464061	0.169639	0.285842	0.206432	0.390103	-0.475573	-0.249897	-0.211815	0.181999	0.0400218	0.304152	0.541344	0.349134	0.382636	0.0817578	0.245072	0.168224	0.293403	0.462469	0.446087	0.66134	0.731707	0.642423	0.729339	0.755545	0.763392	0.785283
RUNX2	-0.719314	-0.687501	-0.38753	-0.3436	-0.662563	-0.579026	-0.647825	-0.663681	-0.333184	-0.0881672	-0.218887	-0.632302	-0.592443	-0.306082	-0.146244	-0.093987	-0.554755	-0.582433	-0.185684	-0.328698	-0.258827	-0.21061	0.085456	0.116934	0.37945	-0.0757745	0.145363	0.0583062	0.423808	0.186583	0.552637	0.725956	0.570714	0.65952	0.458639	0.352922	0.412693	0.481936	0.636506	0.590872	0.364494	0.51644	0.356758	0.70773	0.646041	0.763199	0.733941
SLC9A9	-0.692125	-0.692175	-0.431452	-0.355172	-0.708189	-0.650629	-0.749794	-0.54049	-0.0667235	0.0640713	-0.0430486	-0.531641	-0.535373	-0.245392	-0.126772	-0.0560196	-0.551617	-0.536534	-0.163441	-0.165336	-0.0989325	-0.0104344	0.188156	0.161282	0.381298	-0.287012	-0.0628058	-0.0834193	0.297679	0.111924	0.417699	0.626257	0.451101	0.511374	0.258121	0.295211	0.282463	0.381711	0.544512	0.514978	0.521178	0.630618	0.509149	0.71705	0.703222	0.763111	0.761034
PPAP2A	-0.71003	-0.698539	-0.458778	-0.369185	-0.698374	-0.641002	-0.760976	-0.496043	0.00571543	0.134689	0.0518418	-0.449861	-0.447314	-0.162388	-0.0738465	0.0109447	-0.601573	-0.564455	-0.216184	-0.167596	-0.108079	9e-05	0.133965	0.104384	0.301624	-0.316213	-0.0760645	-0.0809885	0.317702	0.1626	0.322994	0.569386	0.382557	0.454183	0.202852	0.273255	0.243652	0.357056	0.534037	0.520405	0.540843	0.658093	0.56311	0.676284	0.699408	0.762527	0.767391
TENM3	-0.641144	-0.683497	-0.418084	-0.339921	-0.756036	-0.717438	-0.804724	-0.521041	0.0112974	0.0606565	-0.0684619	-0.589768	-0.635831	-0.335653	-0.198553	-0.137287	-0.466348	-0.455809	-0.060528	-0.0409756	0.0339561	0.119761	0.351786	0.286445	0.511819	-0.394109	-0.194238	-0.19151	0.17139	-0.0260738	0.471982	0.644176	0.473861	0.494437	0.200127	0.287847	0.249273	0.347243	0.492539	0.44896	0.603102	0.668226	0.531939	0.788696	0.74979	0.762096	0.768697
HSPG2	-0.665213	-0.690659	-0.444095	-0.354674	-0.739956	-0.698406	-0.805702	-0.485867	0.061334	0.122447	0.0179226	-0.509571	-0.543285	-0.249057	-0.141005	-0.065999	-0.523748	-0.493363	-0.123094	-0.063283	0.0043092	0.107634	0.278173	0.216754	0.421585	-0.402039	-0.184304	-0.171792	0.209453	0.0404094	0.381172	0.592164	0.410882	0.447798	0.161768	0.270115	0.221141	0.331624	0.492122	0.464609	0.606953	0.686114	0.575163	0.741906	0.739118	0.762009	0.773209
SPON2	-0.68967	-0.69268	-0.441994	-0.358646	-0.712242	-0.658814	-0.765957	-0.513088	-0.013475	0.0992136	-4.05e-06	-0.501449	-0.51082	-0.221669	-0.114656	-0.038834	-0.558502	-0.533173	-0.168576	-0.140297	-0.0757064	0.0221231	0.194494	0.158246	0.367496	-0.323855	-0.0969156	-0.104642	0.281102	0.10875	0.380279	0.600221	0.420368	0.478049	0.217538	0.282106	0.255404	0.361457	0.527603	0.503268	0.5476	0.651615	0.540693	0.710308	0.710069	0.761585	0.764856
GRB10	-0.661129	-0.691336	-0.452876	-0.357214	-0.746662	-0.709596	-0.823216	-0.461873	0.111065	0.152495	0.0534893	-0.487247	-0.528028	-0.233683	-0.134503	-0.0555722	-0.525738	-0.486782	-0.122263	-0.0354304	0.0311208	0.142403	0.292394	0.220882	0.416977	-0.439574	-0.220543	-0.195767	0.188895	0.0305533	0.352326	0.571391	0.386155	0.418823	0.124152	0.258779	0.196459	0.312816	0.47543	0.451613	0.634458	0.706747	0.603947	0.740605	0.748149	0.761417	0.777661
COL6A1	-0.629769	-0.678852	-0.402378	-0.331569	-0.760772	-0.722361	-0.798028	-0.544208	-0.0272543	0.0220406	-0.120366	-0.634103	-0.684024	-0.38144	-0.227944	-0.174537	-0.437369	-0.438908	-0.0304563	-0.0381849	0.0404846	0.115404	0.38273	0.318504	0.555999	-0.378867	-0.188288	-0.193833	0.158692	-0.0553057	0.523498	0.674369	0.51074	0.52462	0.229232	0.299271	0.26963	0.359718	0.496849	0.444504	0.592424	0.652658	0.501975	0.810532	0.751251	0.761206	0.764118
APLNR	-0.689273	-0.682723	-0.387173	-0.337415	-0.691255	-0.620989	-0.688667	-0.63398	-0.253878	-0.0660451	-0.203391	-0.643314	-0.630564	-0.339318	-0.177326	-0.12685	-0.512338	-0.535513	-0.132577	-0.243175	-0.169893	-0.116819	0.179582	0.183531	0.441516	-0.159654	0.0498697	-0.0155423	0.342943	0.108548	0.556653	0.717673	0.561969	0.627165	0.398896	0.339763	0.37581	0.448955	0.596112	0.546334	0.427299	0.551133	0.390585	0.742109	0.675942	0.761205	0.740373
NEGR1	-0.715684	-0.693601	-0.432948	-0.360244	-0.68011	-0.611934	-0.714014	-0.557109	-0.123041	0.053934	-0.0443651	-0.510418	-0.491104	-0.2071	-0.0943661	-0.0208217	-0.5898	-0.575884	-0.212568	-0.235133	-0.172661	-0.0862447	0.103484	0.0990473	0.31906	-0.220159	0.0144256	-0.0220297	0.365125	0.181541	0.401234	0.623397	0.448064	0.528805	0.299486	0.302045	0.306866	0.404114	0.57392	0.549812	0.469422	0.60238	0.485326	0.680595	0.674882	0.761091	0.752919
CSF1	-0.667033	-0.686886	-0.425624	-0.347843	-0.729283	-0.681023	-0.775409	-0.527447	-0.0247771	0.0662668	-0.0498962	-0.55402	-0.577856	-0.283839	-0.158228	-0.0914195	-0.512048	-0.497952	-0.116313	-0.104989	-0.0349894	0.0531298	0.263821	0.218252	0.439113	-0.339837	-0.126968	-0.135369	0.237123	0.0478243	0.437729	0.630401	0.457295	0.498888	0.226424	0.289794	0.263635	0.362855	0.51765	0.482284	0.560803	0.649027	0.522142	0.747888	0.724047	0.760986	0.7635
SLC11A1	-0.638751	-0.679672	-0.402609	-0.333404	-0.750739	-0.708252	-0.784631	-0.551826	-0.0502927	0.0166791	-0.122969	-0.628145	-0.669443	-0.368847	-0.216858	-0.162654	-0.451126	-0.453582	-0.0480787	-0.0647727	0.012593	0.0863431	0.351837	0.296184	0.53431	-0.352983	-0.158672	-0.170596	0.184077	-0.0298781	0.519563	0.674904	0.511358	0.532808	0.246325	0.302527	0.279929	0.369006	0.508588	0.45794	0.57263	0.641701	0.492043	0.797997	0.740983	0.760911	0.761352
SERPINA3N	-0.632467	-0.680912	-0.414369	-0.336687	-0.761601	-0.725587	-0.810203	-0.519588	0.0184085	0.0569066	-0.0760281	-0.600236	-0.652152	-0.350886	-0.210189	-0.150925	-0.451939	-0.44302	-0.0443166	-0.0242193	0.0520364	0.13645	0.375474	0.305233	0.531977	-0.406415	-0.210843	-0.205717	0.153356	-0.0467266	0.482717	0.648063	0.479206	0.49394	0.194558	0.287378	0.246186	0.343183	0.48526	0.439162	0.612134	0.670886	0.531652	0.79878	0.754923	0.760717	0.76815
LHFP	-0.640227	-0.684492	-0.430085	-0.344267	-0.759149	-0.724447	-0.820812	-0.491949	0.0668354	0.0990371	-0.0208248	-0.555236	-0.606129	-0.307096	-0.183173	-0.116076	-0.476624	-0.454786	-0.0693461	-0.0176085	0.0551028	0.151173	0.353669	0.279306	0.492851	-0.430978	-0.22732	-0.211291	0.157328	-0.0252286	0.42967	0.615436	0.439814	0.458813	0.157806	0.273883	0.220913	0.326358	0.475879	0.438388	0.629465	0.690083	0.565705	0.779322	0.755982	0.760662	0.772815
CDH11	-0.664021	-0.689113	-0.441676	-0.353411	-0.73796	-0.695978	-0.801921	-0.488562	0.0540806	0.117349	0.0119025	-0.512795	-0.54577	-0.252022	-0.142555	-0.0684279	-0.521483	-0.492582	-0.121869	-0.0662784	0.00144218	0.10326	0.277129	0.217031	0.422924	-0.396397	-0.179557	-0.168785	0.210972	0.0404123	0.385651	0.594541	0.414299	0.451393	0.166861	0.271329	0.224312	0.333623	0.493279	0.465073	0.602248	0.681877	0.569672	0.741451	0.736737	0.760611	0.771074
AMOTL1	-0.741033	-0.701695	-0.465758	-0.377829	-0.664271	-0.594569	-0.721815	-0.507415	-0.0464025	0.13596	0.0677878	-0.41037	-0.379888	-0.102703	-0.0264905	0.0641663	-0.655416	-0.615583	-0.283072	-0.249197	-0.195487	-0.0860685	0.0256695	0.02165	0.214791	-0.244047	0.0112067	-0.00924299	0.399908	0.252895	0.286597	0.555872	0.366602	0.464135	0.24085	0.277287	0.264986	0.378723	0.566535	0.562127	0.484573	0.630643	0.545616	0.626744	0.666105	0.760432	0.759493
MYO5A	-0.658531	-0.6888	-0.444331	-0.353337	-0.74443	-0.705734	-0.813398	-0.477225	0.0805404	0.12951	0.0246636	-0.508035	-0.547142	-0.252543	-0.145328	-0.0702926	-0.515888	-0.483789	-0.113732	-0.0453505	0.0225936	0.127503	0.295439	0.22825	0.430961	-0.420059	-0.204509	-0.1869	0.192925	0.0258794	0.377893	0.587379	0.405855	0.438187	0.146945	0.266116	0.211623	0.323274	0.482491	0.454744	0.619879	0.693316	0.583342	0.746419	0.74407	0.760363	0.773568
HEG1	-0.636121	-0.683011	-0.42575	-0.341762	-0.761269	-0.727037	-0.82019	-0.497287	0.0588067	0.0891927	-0.0344889	-0.567617	-0.620408	-0.320594	-0.192145	-0.127254	-0.467346	-0.448662	-0.0594729	-0.0141613	0.0596693	0.152914	0.365027	0.290111	0.506798	-0.429414	-0.228673	-0.214222	0.151313	-0.0356464	0.443802	0.62335	0.449553	0.465983	0.163852	0.276559	0.225285	0.328693	0.475741	0.435733	0.628465	0.686861	0.558543	0.786281	0.757247	0.760285	0.771695
SPARC	-0.639571	-0.682826	-0.42502	-0.342117	-0.756259	-0.720127	-0.813126	-0.501471	0.0464284	0.0851534	-0.0376518	-0.566137	-0.614965	-0.316174	-0.187896	-0.122961	-0.472489	-0.454704	-0.0666406	-0.0266208	0.0466908	0.138919	0.35137	0.280593	0.497908	-0.416351	-0.214312	-0.203196	0.162751	-0.0247008	0.44362	0.624376	0.45097	0.470719	0.172934	0.278368	0.23079	0.333363	0.481177	0.441666	0.618337	0.680694	0.552394	0.780717	0.752006	0.759669	0.769766
BMP6	-0.726183	-0.698599	-0.460921	-0.372984	-0.676891	-0.612327	-0.735617	-0.503212	-0.0277493	0.132672	0.0578728	-0.42826	-0.409363	-0.129502	-0.0474279	0.0401604	-0.630406	-0.592531	-0.253537	-0.215551	-0.159376	-0.0513981	0.0712962	0.0570437	0.252197	-0.271655	-0.0236477	-0.03832	0.365055	0.214036	0.303969	0.562056	0.374612	0.46105	0.226864	0.275791	0.25711	0.369959	0.552469	0.543785	0.505538	0.639348	0.549564	0.646773	0.678188	0.759568	0.760735
NID1	-0.634302	-0.68237	-0.427482	-0.341999	-0.762099	-0.729061	-0.823714	-0.490561	0.0714713	0.0967594	-0.0253753	-0.561268	-0.615819	-0.316326	-0.190288	-0.124475	-0.467263	-0.446415	-0.0591462	-0.00697802	0.0665028	0.161668	0.368296	0.290875	0.505076	-0.438536	-0.237714	-0.220137	0.145829	-0.0381802	0.435932	0.617314	0.442714	0.458024	0.154026	0.273333	0.2187	0.323486	0.470892	0.43187	0.634779	0.691332	0.565242	0.785047	0.758675	0.759232	0.77192
RHOJ	-0.646718	-0.688593	-0.455455	-0.355216	-0.759242	-0.729177	-0.844672	-0.440057	0.161416	0.172731	0.0734921	-0.4819	-0.535961	-0.240158	-0.143811	-0.0641537	-0.509135	-0.465104	-0.101054	0.00893613	0.0762934	0.192426	0.334177	0.248076	0.438627	-0.486338	-0.271681	-0.233671	0.14897	-0.00377642	0.341903	0.559005	0.372334	0.394077	0.0858167	0.248744	0.172016	0.292021	0.452315	0.428385	0.668728	0.727236	0.627492	0.752245	0.762117	0.759141	0.780632
ADAM23	-0.647809	-0.683575	-0.426696	-0.34434	-0.746989	-0.707512	-0.802341	-0.504798	0.0318034	0.0850316	-0.0339348	-0.55589	-0.59717	-0.300477	-0.175364	-0.108934	-0.486737	-0.46836	-0.0844521	-0.0487585	0.0230141	0.115445	0.322285	0.258473	0.474801	-0.396527	-0.19051	-0.183713	0.184924	-0.000512008	0.43431	0.621015	0.447039	0.473746	0.183592	0.279577	0.236811	0.339373	0.490021	0.452915	0.602871	0.672996	0.54724	0.767455	0.742915	0.75903	0.767505
ADAMTS1	-0.655018	-0.680291	-0.404856	-0.337317	-0.730432	-0.680855	-0.760389	-0.559697	-0.0837106	0.0141613	-0.117914	-0.608178	-0.633535	-0.337594	-0.191572	-0.134688	-0.479401	-0.48129	-0.0843228	-0.111821	-0.0376064	0.0358673	0.291148	0.250492	0.486965	-0.309393	-0.107329	-0.128943	0.230502	0.0201159	0.502124	0.668771	0.504568	0.540466	0.270518	0.305457	0.293677	0.382179	0.527194	0.481227	0.538382	0.623686	0.478783	0.770106	0.720878	0.758698	0.755461
GUCY1B3	-0.676608	-0.694277	-0.470948	-0.367035	-0.732301	-0.693313	-0.821642	-0.433289	0.149556	0.19895	0.118782	-0.425105	-0.45678	-0.167888	-0.0909728	-0.00195922	-0.566706	-0.512829	-0.168394	-0.0510073	0.00981274	0.134011	0.237027	0.168356	0.348185	-0.445168	-0.213559	-0.181184	0.215905	0.0796262	0.282541	0.529991	0.337108	0.381689	0.0939312	0.244303	0.174022	0.29948	0.472915	0.461264	0.636008	0.718272	0.634961	0.703139	0.737886	0.758674	0.778451
ATP1A2	-0.698994	-0.700941	-0.496018	-0.38108	-0.717318	-0.675821	-0.823463	-0.398389	0.199992	0.259287	0.202773	-0.347669	-0.368079	-0.0848817	-0.0360453	0.0662041	-0.621062	-0.54787	-0.227559	-0.0703973	-0.0166072	0.124649	0.168134	0.102568	0.262358	-0.454901	-0.206346	-0.163952	0.250631	0.141963	0.194683	0.479321	0.275851	0.335634	0.0552498	0.22675	0.145809	0.283452	0.471376	0.475173	0.641211	0.736326	0.677534	0.658581	0.728167	0.758379	0.782821
CMTM3	-0.697706	-0.688804	-0.427999	-0.354609	-0.692858	-0.630904	-0.7294	-0.548117	-0.0962178	0.054378	-0.0499883	-0.525229	-0.519223	-0.233016	-0.115513	-0.0448676	-0.56214	-0.549177	-0.180588	-0.195082	-0.130274	-0.0445126	0.153641	0.136979	0.357442	-0.254056	-0.0275354	-0.0561109	0.324477	0.138507	0.414866	0.625722	0.452198	0.520391	0.278853	0.298227	0.294455	0.39133	0.555397	0.527302	0.494331	0.613029	0.492293	0.70013	0.687386	0.758339	0.753105
NTN1	-0.680052	-0.695242	-0.476834	-0.369936	-0.729771	-0.690929	-0.823884	-0.422762	0.16634	0.214954	0.1403	-0.406361	-0.436751	-0.149164	-0.0791019	0.013025	-0.577412	-0.51855	-0.179926	-0.0509853	0.0082546	0.136859	0.225144	0.155743	0.330267	-0.451989	-0.216985	-0.180949	0.219829	0.0906019	0.26092	0.516712	0.321305	0.368292	0.080995	0.239092	0.164898	0.293506	0.469998	0.461935	0.640421	0.724237	0.646977	0.693647	0.736719	0.758039	0.779426
MMP19	-0.640593	-0.67356	-0.380203	-0.3249	-0.734624	-0.683817	-0.745203	-0.599575	-0.15346	-0.0491274	-0.201353	-0.676691	-0.70501	-0.405832	-0.234254	-0.18953	-0.438695	-0.460102	-0.0431059	-0.117242	-0.0375351	0.0182584	0.32905	0.293303	0.549375	-0.275807	-0.0870234	-0.124135	0.219808	-0.0169239	0.582733	0.71725	0.563612	0.591685	0.32317	0.324951	0.329946	0.405604	0.538628	0.479344	0.514404	0.595242	0.427783	0.80055	0.719778	0.757558	0.747552
MAMDC2	-0.676047	-0.695483	-0.483244	-0.371575	-0.735428	-0.700292	-0.837877	-0.404065	0.205412	0.237805	0.167063	-0.390067	-0.42646	-0.138698	-0.0751588	0.0198079	-0.577572	-0.512244	-0.177763	-0.0279034	0.0306523	0.165266	0.238325	0.160674	0.328567	-0.482106	-0.246517	-0.200784	0.202254	0.0810572	0.239621	0.500996	0.302682	0.345841	0.0514118	0.230276	0.145533	0.27858	0.456398	0.450955	0.662474	0.740382	0.669149	0.693542	0.744132	0.757409	0.782768
PRKCDBP	-0.665844	-0.692089	-0.471127	-0.364885	-0.741437	-0.707177	-0.835569	-0.421135	0.179434	0.208543	0.126795	-0.426284	-0.467321	-0.177129	-0.100372	-0.0116804	-0.552579	-0.496549	-0.150961	-0.0208326	0.0409391	0.167281	0.268501	0.190104	0.367519	-0.475159	-0.247429	-0.207006	0.187712	0.0534236	0.281028	0.524955	0.33177	0.368292	0.0712019	0.238803	0.159745	0.286854	0.4579	0.445244	0.658106	0.730586	0.647793	0.713444	0.747612	0.757212	0.780138
PTGER1	-0.668377	-0.689543	-0.455218	-0.359249	-0.732634	-0.692291	-0.809338	-0.458795	0.10255	0.158638	0.0664652	-0.466299	-0.498449	-0.208139	-0.115667	-0.0341658	-0.543005	-0.50144	-0.145364	-0.0584305	0.00553799	0.118458	0.25555	0.191318	0.383234	-0.419882	-0.196168	-0.174431	0.212977	0.060483	0.331696	0.559649	0.373526	0.414375	0.129165	0.256667	0.197957	0.315162	0.481362	0.461718	0.61744	0.698216	0.601143	0.719411	0.734892	0.757176	0.77235
FBLN5	-0.64368	-0.678704	-0.409559	-0.336786	-0.741581	-0.698364	-0.781257	-0.536754	-0.0323351	0.0380367	-0.0924626	-0.597384	-0.634366	-0.337304	-0.196088	-0.137426	-0.468428	-0.463999	-0.0691265	-0.0716665	0.00279757	0.082249	0.325198	0.271025	0.500842	-0.354414	-0.15498	-0.163349	0.195834	-0.00722644	0.485647	0.653524	0.487014	0.513861	0.231521	0.294817	0.268612	0.361581	0.505665	0.460791	0.571434	0.644844	0.504673	0.778039	0.733748	0.757049	0.759122
LAMB1	-0.62279	-0.672459	-0.387784	-0.324273	-0.755439	-0.714991	-0.781172	-0.565241	-0.0722031	-0.012936	-0.164037	-0.664279	-0.712152	-0.410098	-0.244675	-0.197513	-0.419539	-0.431539	-0.0157939	-0.0511289	0.0295069	0.0944561	0.388563	0.330512	0.577279	-0.349623	-0.165382	-0.181406	0.162248	-0.0643681	0.561251	0.696492	0.539148	0.551844	0.262056	0.309214	0.291138	0.373751	0.504969	0.446631	0.569507	0.63057	0.469313	0.817594	0.74313	0.756886	0.755318
X4632428N05RIK	-0.652359	-0.676954	-0.394884	-0.332825	-0.72643	-0.674684	-0.747478	-0.577305	-0.120243	-0.0123395	-0.150673	-0.630687	-0.653361	-0.357546	-0.202681	-0.15018	-0.4691	-0.478829	-0.0761731	-0.12533	-0.0497143	0.0163845	0.291607	0.25664	0.500469	-0.284753	-0.0864563	-0.116734	0.237143	0.0170789	0.530307	0.68638	0.526515	0.56268	0.297621	0.313808	0.311523	0.394538	0.535812	0.485586	0.519689	0.607013	0.454198	0.774954	0.714772	0.756875	0.749982
FMO2	-0.657013	-0.687377	-0.451328	-0.355492	-0.742785	-0.70637	-0.820145	-0.456369	0.115946	0.155221	0.0575867	-0.481359	-0.522511	-0.22995	-0.132526	-0.0535373	-0.523344	-0.483564	-0.122015	-0.0325704	0.0334146	0.145009	0.291459	0.219372	0.413228	-0.440884	-0.222858	-0.196885	0.186014	0.0299597	0.346475	0.565416	0.380774	0.412961	0.119224	0.255928	0.192518	0.3089	0.470904	0.447751	0.633552	0.704836	0.603706	0.735669	0.74455	0.756849	0.773554
GPX8	-0.641953	-0.684446	-0.444185	-0.349775	-0.756174	-0.724418	-0.83229	-0.458017	0.124886	0.144276	0.0376983	-0.507565	-0.560101	-0.264236	-0.157906	-0.0832636	-0.495176	-0.459673	-0.0890052	-0.00147663	0.0676192	0.175747	0.33978	0.258549	0.457034	-0.463283	-0.253524	-0.22402	0.151925	-0.0114538	0.373558	0.578115	0.39631	0.41705	0.112822	0.257303	0.189907	0.303964	0.459634	0.430719	0.651125	0.710335	0.60172	0.759386	0.756761	0.756825	0.774685
FGFR1	-0.647878	-0.686805	-0.453902	-0.354685	-0.753499	-0.722044	-0.837227	-0.442023	0.151796	0.169497	0.0712763	-0.479245	-0.530097	-0.235822	-0.139967	-0.0604113	-0.512068	-0.468743	-0.10655	-0.000689427	0.0660756	0.181226	0.32262	0.239905	0.430381	-0.475219	-0.260018	-0.224602	0.1575	0.00487404	0.340534	0.558197	0.372233	0.396526	0.0923696	0.24944	0.175674	0.294803	0.455358	0.431935	0.659387	0.720835	0.621459	0.745962	0.756214	0.75682	0.777276
GGT5	-0.635339	-0.680141	-0.424043	-0.340708	-0.755546	-0.720569	-0.813587	-0.496446	0.0538953	0.0880399	-0.0343226	-0.563227	-0.613835	-0.315848	-0.188499	-0.123638	-0.46858	-0.450048	-0.0634246	-0.0199881	0.0531777	0.145864	0.356213	0.283514	0.499219	-0.421929	-0.221174	-0.208101	0.156363	-0.0295517	0.440339	0.620297	0.447232	0.465332	0.166548	0.275892	0.226303	0.329107	0.476119	0.436765	0.621367	0.681501	0.554153	0.779701	0.751528	0.756776	0.767632
C1QA	-0.626841	-0.673975	-0.394791	-0.327755	-0.753366	-0.713199	-0.784716	-0.553245	-0.0521651	0.0056347	-0.139322	-0.643372	-0.690096	-0.389278	-0.231572	-0.180828	-0.431641	-0.437888	-0.0284511	-0.05022	0.0286968	0.0987922	0.376223	0.316999	0.557808	-0.358581	-0.170447	-0.182054	0.165988	-0.0526718	0.5369	0.681662	0.521313	0.536521	0.246768	0.303312	0.280485	0.366806	0.501539	0.447228	0.57563	0.638211	0.48377	0.807646	0.742624	0.756657	0.757023
TMEM255B	-0.706699	-0.692851	-0.453398	-0.366029	-0.689485	-0.630957	-0.748882	-0.497991	-0.00815297	0.126857	0.04416	-0.449298	-0.443795	-0.161598	-0.0723795	0.0111224	-0.598879	-0.563868	-0.21791	-0.176557	-0.117577	-0.012027	0.124313	0.0985182	0.295925	-0.301585	-0.0629408	-0.0713653	0.32382	0.16796	0.325093	0.56878	0.384247	0.457529	0.211583	0.273792	0.248304	0.359471	0.535066	0.521164	0.527439	0.64671	0.551147	0.668624	0.690024	0.756345	0.759742
PTGS1	-0.641475	-0.68435	-0.446309	-0.350459	-0.756496	-0.725519	-0.835091	-0.452197	0.135611	0.151624	0.0468614	-0.50073	-0.554206	-0.258677	-0.154922	-0.0791917	-0.496895	-0.459229	-0.0905982	0.00312284	0.0717674	0.181831	0.340119	0.257152	0.453276	-0.470285	-0.259898	-0.227823	0.149058	-0.0113832	0.365273	0.57234	0.389589	0.409989	0.104564	0.254496	0.184331	0.299783	0.456191	0.428454	0.656004	0.714288	0.608006	0.757313	0.757677	0.756235	0.775165
DCHS1	-0.645735	-0.68555	-0.450644	-0.352965	-0.753499	-0.721912	-0.834841	-0.446537	0.143287	0.161775	0.0612003	-0.487159	-0.538322	-0.243852	-0.144991	-0.0669468	-0.506861	-0.465911	-0.10155	-0.00137423	0.0660057	0.178956	0.326925	0.244865	0.437573	-0.470841	-0.257371	-0.223849	0.156145	0.000452426	0.349994	0.56366	0.379087	0.402433	0.098658	0.251624	0.179931	0.297438	0.456451	0.431445	0.656052	0.716934	0.614913	0.749119	0.755576	0.756191	0.775817
VIM	-0.65259	-0.685721	-0.447915	-0.353251	-0.744875	-0.709291	-0.820642	-0.458887	0.112894	0.148814	0.0482516	-0.490379	-0.533833	-0.240715	-0.140011	-0.0627234	-0.514837	-0.477195	-0.112946	-0.02704	0.0398321	0.149495	0.302798	0.229383	0.425225	-0.442456	-0.227076	-0.20149	0.178704	0.019672	0.356591	0.570483	0.387252	0.416733	0.121395	0.257235	0.194247	0.309227	0.469088	0.443988	0.634667	0.703312	0.599372	0.741453	0.746065	0.756045	0.772503
DLC1	-0.645723	-0.684466	-0.445298	-0.350888	-0.751148	-0.717879	-0.827013	-0.45817	0.119794	0.145801	0.0416419	-0.500549	-0.549425	-0.254853	-0.150769	-0.0751563	-0.502577	-0.466302	-0.0983952	-0.0117164	0.0564591	0.165073	0.324869	0.246835	0.444186	-0.454533	-0.24271	-0.214841	0.162499	0.000891634	0.366758	0.574811	0.392593	0.416791	0.116332	0.257158	0.191622	0.305931	0.463134	0.435725	0.644023	0.706952	0.600214	0.751783	0.75196	0.755989	0.773256
FXYD5	-0.629541	-0.67196	-0.384637	-0.324321	-0.745373	-0.700712	-0.765276	-0.577502	-0.104036	-0.0262733	-0.17704	-0.666465	-0.706031	-0.405775	-0.238762	-0.192365	-0.42791	-0.44328	-0.0282614	-0.0784344	0.00152893	0.0630336	0.362086	0.313291	0.562985	-0.319193	-0.133012	-0.157373	0.186239	-0.0434919	0.567061	0.702643	0.546823	0.566114	0.28564	0.314716	0.305826	0.38575	0.517823	0.459551	0.546239	0.615556	0.452601	0.808282	0.732172	0.755913	0.751016
F630028O10RIK	-0.638294	-0.671948	-0.37992	-0.324211	-0.733865	-0.683718	-0.745382	-0.595987	-0.148268	-0.0465355	-0.198133	-0.673738	-0.702949	-0.404379	-0.233785	-0.188922	-0.437079	-0.457761	-0.0420358	-0.113556	-0.0340498	0.0222518	0.330887	0.294047	0.548832	-0.279221	-0.0909878	-0.126785	0.216471	-0.0189112	0.579424	0.713979	0.560417	0.587722	0.318763	0.323174	0.326818	0.402776	0.535509	0.47655	0.516198	0.595884	0.429371	0.799176	0.719237	0.75571	0.746223
PRICKLE1	-0.682686	-0.688487	-0.446778	-0.3587	-0.711377	-0.66163	-0.773827	-0.489204	0.0272173	0.124576	0.0315315	-0.476702	-0.49081	-0.203978	-0.105986	-0.0270306	-0.558782	-0.526087	-0.169803	-0.119026	-0.0560693	0.0480105	0.200329	0.156804	0.356811	-0.350648	-0.123492	-0.121277	0.265172	0.10369	0.350894	0.577335	0.395224	0.450037	0.185217	0.270476	0.233225	0.343625	0.51093	0.490401	0.564867	0.663548	0.56094	0.701801	0.711269	0.755557	0.762897
X2700081O15RIK	-0.703922	-0.6925	-0.457161	-0.366864	-0.6922	-0.63594	-0.756765	-0.485915	0.016019	0.141194	0.06117	-0.438291	-0.436316	-0.1543	-0.0693843	0.0159016	-0.599031	-0.55994	-0.217014	-0.162629	-0.104181	0.00509268	0.131507	0.100768	0.293798	-0.319675	-0.0807017	-0.0831472	0.313259	0.162666	0.311053	0.558294	0.372045	0.4431	0.19311	0.268056	0.236093	0.34998	0.526379	0.514229	0.540417	0.656141	0.564552	0.667572	0.693854	0.755345	0.761192
ANGPTL2	-0.642654	-0.682804	-0.443142	-0.349361	-0.751368	-0.718614	-0.82647	-0.458586	0.11872	0.142761	0.03732	-0.504213	-0.554278	-0.259782	-0.15428	-0.0795697	-0.497698	-0.46244	-0.0936906	-0.00857029	0.0599567	0.167562	0.330367	0.251634	0.449638	-0.455233	-0.244987	-0.217196	0.158361	-0.00441953	0.371059	0.57641	0.395077	0.417829	0.116823	0.257364	0.191957	0.305492	0.461448	0.433136	0.644138	0.705575	0.59765	0.753767	0.751919	0.754654	0.771837
FSTL1	-0.642478	-0.680656	-0.43214	-0.345068	-0.74693	-0.710809	-0.810804	-0.482539	0.0707636	0.109858	-0.00310813	-0.532217	-0.57781	-0.282989	-0.166605	-0.096942	-0.488504	-0.462896	-0.0866492	-0.029204	0.0410221	0.139701	0.327086	0.256422	0.464061	-0.422305	-0.215544	-0.199267	0.170796	-0.00426611	0.405967	0.599595	0.423107	0.447402	0.152945	0.268775	0.215902	0.322863	0.475026	0.44168	0.619927	0.685352	0.567605	0.759795	0.744869	0.754382	0.766754
PAPPA	-0.636775	-0.671679	-0.384768	-0.325687	-0.735053	-0.686878	-0.752402	-0.5823	-0.122643	-0.0294601	-0.177024	-0.658347	-0.690108	-0.392221	-0.227458	-0.18014	-0.440377	-0.456061	-0.0448733	-0.101798	-0.0232659	0.0375207	0.333078	0.29187	0.541213	-0.296443	-0.106948	-0.136561	0.208735	-0.0199187	0.560622	0.700718	0.544988	0.571164	0.299059	0.316589	0.313567	0.392765	0.527076	0.470737	0.528273	0.605431	0.444218	0.794993	0.721796	0.75436	0.74744
DAB2	-0.633837	-0.680487	-0.437267	-0.345332	-0.757842	-0.727222	-0.830539	-0.462834	0.116555	0.131651	0.0201227	-0.522834	-0.578603	-0.282355	-0.170288	-0.0988075	-0.480253	-0.448849	-0.0740538	0.0058344	0.076326	0.180602	0.356852	0.274221	0.476156	-0.462688	-0.257713	-0.229663	0.140978	-0.0276571	0.391266	0.58669	0.407765	0.424304	0.118533	0.259699	0.193949	0.305143	0.456897	0.424615	0.65008	0.705296	0.591763	0.767596	0.757343	0.754211	0.771319
TCF21	-0.648355	-0.678649	-0.418295	-0.340866	-0.734868	-0.691733	-0.782129	-0.518462	-0.0059542	0.0641056	-0.05675	-0.564438	-0.598634	-0.304609	-0.175202	-0.111478	-0.485887	-0.47327	-0.0892124	-0.0731898	-0.00161633	0.0848585	0.302671	0.247986	0.468478	-0.363129	-0.158328	-0.161027	0.203504	0.0126399	0.448346	0.629914	0.459648	0.490909	0.210625	0.285656	0.253494	0.351381	0.500329	0.461623	0.576012	0.652387	0.522662	0.759536	0.729297	0.754074	0.758647
ZCCHC24	-0.661146	-0.687077	-0.458954	-0.35904	-0.736252	-0.699827	-0.820272	-0.440044	0.138888	0.178301	0.0893827	-0.45161	-0.490048	-0.200363	-0.113556	-0.0300598	-0.539061	-0.492009	-0.14033	-0.0345678	0.0287786	0.146571	0.270477	0.198171	0.383641	-0.447857	-0.225034	-0.194166	0.193409	0.0483056	0.312942	0.544128	0.356208	0.392507	0.100941	0.247727	0.179197	0.299899	0.466242	0.448645	0.636905	0.711024	0.619283	0.718553	0.740031	0.753886	0.772756
DPYSL2	-0.643912	-0.680102	-0.430716	-0.344756	-0.743755	-0.706433	-0.805684	-0.486325	0.0607401	0.105179	-0.00789908	-0.533475	-0.576713	-0.282504	-0.16539	-0.096137	-0.490133	-0.465752	-0.0896325	-0.0370541	0.0330177	0.130437	0.319864	0.251939	0.460568	-0.412983	-0.205939	-0.19225	0.177424	0.00121478	0.408476	0.601693	0.42586	0.451926	0.160286	0.270469	0.220461	0.326438	0.478617	0.445133	0.612679	0.680371	0.561903	0.757169	0.741372	0.75373	0.765058
GUCY1A3	-0.665556	-0.688982	-0.468337	-0.363501	-0.734534	-0.698945	-0.826489	-0.423007	0.168443	0.203902	0.122957	-0.424086	-0.461939	-0.173714	-0.097139	-0.00891346	-0.553789	-0.498888	-0.155399	-0.03037	0.0308027	0.15565	0.25729	0.182452	0.359813	-0.462787	-0.235152	-0.197623	0.195597	0.0612147	0.280562	0.524058	0.332093	0.370928	0.0784328	0.239399	0.163686	0.289487	0.46028	0.447917	0.647324	0.722495	0.639825	0.706508	0.740449	0.753561	0.775311
RGS10	-0.653074	-0.679113	-0.420347	-0.342545	-0.729598	-0.684848	-0.777153	-0.517698	-0.0094899	0.0675588	-0.050163	-0.555144	-0.585318	-0.29267	-0.166359	-0.101221	-0.495207	-0.481201	-0.100545	-0.0841207	-0.0136687	0.0738614	0.285617	0.234225	0.453022	-0.354764	-0.147284	-0.151311	0.215298	0.0270176	0.438902	0.625218	0.454143	0.48937	0.213011	0.285057	0.254418	0.352976	0.503974	0.467253	0.569235	0.64978	0.522668	0.750754	0.724417	0.753486	0.757611
GUCY1A2	-0.636059	-0.673879	-0.401362	-0.331879	-0.740583	-0.697719	-0.775477	-0.543786	-0.0474793	0.0221618	-0.113291	-0.613147	-0.651749	-0.354925	-0.207554	-0.152385	-0.454229	-0.45475	-0.0560976	-0.0696089	0.00609938	0.080774	0.337202	0.283522	0.517313	-0.34724	-0.152554	-0.164134	0.18921	-0.0197627	0.504785	0.663099	0.500041	0.523855	0.242076	0.298167	0.275576	0.364938	0.505002	0.456688	0.565064	0.635954	0.490456	0.783954	0.731445	0.753455	0.754063
MR1	-0.647362	-0.682839	-0.445699	-0.351182	-0.745072	-0.710746	-0.82111	-0.45588	0.117548	0.148472	0.0470802	-0.49169	-0.537485	-0.24481	-0.143519	-0.0669915	-0.508218	-0.470859	-0.106694	-0.0195355	0.0475744	0.156799	0.311211	0.235742	0.431096	-0.447458	-0.234198	-0.207224	0.17065	0.0116416	0.358071	0.569249	0.386885	0.413954	0.11721	0.255776	0.191376	0.305955	0.464289	0.438525	0.637443	0.703245	0.598928	0.742915	0.746214	0.753337	0.770292
RGL1	-0.649325	-0.685018	-0.458635	-0.356523	-0.747125	-0.715832	-0.835775	-0.428522	0.169339	0.186671	0.0951813	-0.455861	-0.504762	-0.213269	-0.125607	-0.042846	-0.522446	-0.473706	-0.119702	-0.0015425	0.0631132	0.182713	0.306818	0.223912	0.407616	-0.480053	-0.261805	-0.222617	0.162106	0.0180867	0.314555	0.540863	0.352839	0.379996	0.0779413	0.242611	0.164972	0.28712	0.450529	0.431311	0.660926	0.724159	0.632068	0.731677	0.751359	0.752894	0.774999
GPRC5B	-0.659668	-0.683969	-0.446444	-0.353855	-0.731324	-0.691531	-0.803213	-0.465256	0.0878889	0.14252	0.0452821	-0.482155	-0.516248	-0.226371	-0.127658	-0.049818	-0.52753	-0.491012	-0.1313	-0.0552876	0.00993875	0.117933	0.2687	0.204709	0.400475	-0.413158	-0.194624	-0.17594	0.205087	0.0467063	0.351038	0.568873	0.386434	0.423872	0.139162	0.259724	0.204488	0.317949	0.47981	0.456615	0.611127	0.688931	0.586481	0.725249	0.73226	0.752835	0.766594
ARHGAP23	-0.640616	-0.681723	-0.445624	-0.349791	-0.751411	-0.720057	-0.830194	-0.449129	0.135391	0.153518	0.0506913	-0.493984	-0.545828	-0.252094	-0.150376	-0.0742314	-0.498766	-0.460369	-0.0948894	-0.000407951	0.0674485	0.177781	0.332153	0.250529	0.444817	-0.466228	-0.255559	-0.223721	0.15258	-0.00573443	0.35879	0.567259	0.384789	0.406593	0.10375	0.252777	0.18305	0.298514	0.455198	0.428534	0.651468	0.710989	0.606529	0.750478	0.752834	0.752826	0.771676
LUM	-0.634195	-0.679435	-0.436644	-0.345066	-0.754885	-0.723682	-0.827016	-0.463014	0.113055	0.130883	0.0200879	-0.520622	-0.574916	-0.279526	-0.168023	-0.0964843	-0.481768	-0.450469	-0.0769072	0.0016535	0.0717863	0.175779	0.351151	0.269997	0.471574	-0.457942	-0.252677	-0.225608	0.144786	-0.0234106	0.389549	0.585488	0.406843	0.424587	0.12076	0.259653	0.195049	0.305949	0.457878	0.425988	0.645913	0.702448	0.58939	0.764097	0.754376	0.752824	0.769545
OSMR	-0.621258	-0.672535	-0.406049	-0.330721	-0.756929	-0.722144	-0.80279	-0.518599	0.012989	0.0475648	-0.0879225	-0.60649	-0.660562	-0.361402	-0.21769	-0.161195	-0.437173	-0.431235	-0.0327156	-0.0179827	0.0586944	0.1397	0.385594	0.314661	0.542019	-0.403479	-0.213031	-0.208794	0.143505	-0.0587227	0.49161	0.648939	0.48351	0.494887	0.196556	0.286668	0.246775	0.340966	0.479014	0.430826	0.607024	0.662172	0.520513	0.798569	0.749534	0.752691	0.7596
PID1	-0.615007	-0.670139	-0.396558	-0.32583	-0.759939	-0.725062	-0.798561	-0.533724	-0.0120512	0.0233106	-0.120417	-0.634238	-0.690357	-0.389585	-0.235635	-0.183959	-0.420053	-0.421672	-0.0148145	-0.0174643	0.0615332	0.135763	0.403721	0.333823	0.568912	-0.393089	-0.208128	-0.209329	0.13685	-0.075809	0.523842	0.668206	0.50683	0.514389	0.215587	0.294124	0.260086	0.349388	0.482557	0.428955	0.599892	0.652434	0.501761	0.812141	0.750489	0.752637	0.757142
ZFP521	-0.675479	-0.690442	-0.475483	-0.36812	-0.724492	-0.68638	-0.819987	-0.415093	0.173487	0.219753	0.147391	-0.397123	-0.427655	-0.142451	-0.0752588	0.0172566	-0.575781	-0.515438	-0.181123	-0.0480342	0.0103221	0.139711	0.222146	0.152155	0.323407	-0.453686	-0.219518	-0.181789	0.217205	0.0914928	0.251495	0.508037	0.313126	0.359917	0.0740239	0.235128	0.159364	0.288283	0.464368	0.45751	0.639274	0.722191	0.647607	0.686329	0.73191	0.752304	0.774362
RGS5	-0.649289	-0.683094	-0.45084	-0.353458	-0.742904	-0.709089	-0.823655	-0.444931	0.135207	0.16387	0.0675227	-0.474126	-0.519403	-0.228038	-0.133159	-0.0538332	-0.516697	-0.474598	-0.115967	-0.0172418	0.0484334	0.161813	0.302377	0.225558	0.415696	-0.455695	-0.239737	-0.208797	0.172045	0.0198088	0.337739	0.556212	0.371621	0.40029	0.103478	0.250375	0.181747	0.29928	0.460149	0.437641	0.642733	0.70919	0.610573	0.734405	0.745349	0.752119	0.770786
NFATC4	-0.685308	-0.686	-0.445524	-0.358483	-0.702009	-0.650087	-0.762679	-0.490454	0.0151783	0.122483	0.0320481	-0.469136	-0.477948	-0.193705	-0.0977415	-0.0183485	-0.565524	-0.533008	-0.180651	-0.134225	-0.0724819	0.0308921	0.179942	0.14161	0.340556	-0.334466	-0.105767	-0.106963	0.27941	0.119394	0.344793	0.573721	0.392213	0.451506	0.193184	0.270665	0.237347	0.346978	0.515299	0.496233	0.551087	0.654715	0.553789	0.690285	0.701903	0.751949	0.757958
COL6A2	-0.62249	-0.668944	-0.388434	-0.324114	-0.747442	-0.706501	-0.774781	-0.557876	-0.0677925	-0.00574364	-0.152532	-0.64937	-0.694557	-0.395445	-0.234857	-0.186235	-0.425175	-0.434734	-0.0251339	-0.0561377	0.0229274	0.0894931	0.37387	0.317527	0.560175	-0.345746	-0.160163	-0.175495	0.168344	-0.0532485	0.545915	0.685483	0.52784	0.543208	0.257242	0.305282	0.28673	0.370239	0.502699	0.4469	0.564257	0.627508	0.470554	0.805147	0.73586	0.751805	0.750574
KCNJ8	-0.648432	-0.681728	-0.445521	-0.351207	-0.741007	-0.705861	-0.816698	-0.455404	0.114142	0.148847	0.0489235	-0.487155	-0.530785	-0.239309	-0.139364	-0.0624529	-0.511488	-0.473826	-0.111749	-0.0254126	0.0410837	0.150339	0.302299	0.22881	0.42328	-0.441572	-0.227522	-0.201595	0.17641	0.0185646	0.353925	0.56664	0.384375	0.413356	0.119259	0.255364	0.192206	0.306693	0.465605	0.440691	0.63224	0.700055	0.59689	0.737481	0.742254	0.751645	0.768204
ARHGAP10	-0.625364	-0.674427	-0.418493	-0.336251	-0.755462	-0.722479	-0.812655	-0.493669	0.0569506	0.0833655	-0.0415223	-0.56923	-0.623782	-0.326574	-0.196752	-0.13396	-0.454817	-0.438007	-0.0505855	-0.0081311	0.0657065	0.156471	0.371977	0.296322	0.512294	-0.427533	-0.231245	-0.216919	0.142463	-0.0449299	0.447498	0.620838	0.450009	0.463678	0.162966	0.274524	0.223757	0.324997	0.468633	0.427385	0.623792	0.678971	0.549683	0.783326	0.751032	0.751633	0.762855
PCSK6	-0.65356	-0.678793	-0.425888	-0.344644	-0.727966	-0.684397	-0.781342	-0.503743	0.0138949	0.0858627	-0.0263825	-0.535466	-0.566216	-0.275006	-0.155915	-0.0877338	-0.502644	-0.483101	-0.108648	-0.0777678	-0.00882893	0.0835507	0.279564	0.225481	0.438066	-0.367495	-0.157597	-0.156205	0.213234	0.0328331	0.415865	0.609772	0.436264	0.472251	0.194789	0.278219	0.241796	0.3438	0.497249	0.464046	0.577599	0.657615	0.536975	0.742197	0.724311	0.751581	0.758
TWSG1	-0.64805	-0.673477	-0.399754	-0.333478	-0.723702	-0.674537	-0.752394	-0.55639	-0.0864362	0.0108213	-0.121021	-0.605869	-0.631141	-0.33785	-0.19192	-0.136195	-0.472768	-0.475628	-0.0814202	-0.111016	-0.0372279	0.0346512	0.290319	0.250293	0.48551	-0.304763	-0.105297	-0.127487	0.227752	0.0180311	0.501437	0.664866	0.502761	0.537917	0.270603	0.303538	0.292715	0.379725	0.522751	0.476545	0.532057	0.616318	0.471648	0.764331	0.713971	0.751423	0.747875
LAMA4	-0.618	-0.672251	-0.412548	-0.332481	-0.760338	-0.728803	-0.814465	-0.499431	0.0505814	0.0710257	-0.0596087	-0.587269	-0.646112	-0.347446	-0.211162	-0.15153	-0.439465	-0.426768	-0.0336566	0.0018247	0.0774446	0.164595	0.393557	0.315451	0.535578	-0.430529	-0.238952	-0.225511	0.12925	-0.0641457	0.467518	0.631509	0.463148	0.471821	0.167814	0.277523	0.227671	0.326339	0.466124	0.421114	0.626352	0.676758	0.541902	0.795285	0.75479	0.751182	0.761882
SMARCD3	-0.724867	-0.691026	-0.452813	-0.369014	-0.660937	-0.593079	-0.713194	-0.510563	-0.0587084	0.117424	0.0431798	-0.427724	-0.401387	-0.125895	-0.0425307	0.0431766	-0.630894	-0.597001	-0.261556	-0.238856	-0.183726	-0.0804519	0.0469804	0.0415714	0.237982	-0.239915	0.00709674	-0.0155413	0.383402	0.230345	0.308328	0.56337	0.379464	0.470963	0.247775	0.278633	0.269068	0.377985	0.559176	0.550311	0.47835	0.618372	0.527348	0.632465	0.661263	0.751088	0.74899
SGCE	-0.6648	-0.687609	-0.471998	-0.364574	-0.732124	-0.697565	-0.828598	-0.411137	0.186995	0.21821	0.141742	-0.407755	-0.446073	-0.159444	-0.0887389	0.00176517	-0.558721	-0.499486	-0.161475	-0.0250516	0.0348258	0.163347	0.252284	0.175356	0.347472	-0.472391	-0.243223	-0.201384	0.193441	0.0655587	0.261769	0.510891	0.317295	0.356616	0.0636448	0.233535	0.153277	0.281631	0.454085	0.444534	0.6531	0.72766	0.650277	0.69864	0.739248	0.750828	0.774391
DPT	-0.630381	-0.675915	-0.427069	-0.340488	-0.751973	-0.719222	-0.816102	-0.478458	0.0813937	0.106572	-0.0103721	-0.542225	-0.594981	-0.299604	-0.179672	-0.112371	-0.470288	-0.446256	-0.0671702	-0.00793197	0.0636379	0.160799	0.355031	0.278253	0.486576	-0.437629	-0.236424	-0.216757	0.148002	-0.0292142	0.416298	0.601707	0.4272	0.444305	0.144161	0.267002	0.21052	0.316339	0.464405	0.428332	0.630394	0.68777	0.567214	0.769782	0.749517	0.750824	0.764394
SLC9A3R2	-0.657757	-0.676537	-0.414357	-0.340959	-0.717459	-0.668249	-0.757397	-0.53221	-0.0480251	0.0489574	-0.0694866	-0.56077	-0.582234	-0.291968	-0.162545	-0.0991909	-0.500218	-0.491142	-0.110807	-0.113342	-0.0434016	0.0390705	0.259321	0.218227	0.440942	-0.319297	-0.111132	-0.125062	0.239603	0.0466792	0.449471	0.633553	0.465212	0.506848	0.241143	0.291553	0.271887	0.366489	0.517237	0.479778	0.541531	0.63037	0.500233	0.741131	0.710986	0.750608	0.750726
TMEM176B	-0.625258	-0.666561	-0.37838	-0.320693	-0.738477	-0.692951	-0.754534	-0.581361	-0.119329	-0.0368514	-0.188932	-0.670708	-0.708359	-0.410153	-0.240826	-0.196371	-0.422233	-0.440637	-0.0261746	-0.0851462	-0.00522401	0.0529348	0.357797	0.312145	0.563214	-0.305725	-0.121897	-0.149953	0.189514	-0.0425744	0.574282	0.705217	0.552061	0.571884	0.295697	0.316268	0.311651	0.388864	0.518836	0.459382	0.53413	0.604445	0.439481	0.804275	0.724519	0.750506	0.744033
CD200	-0.722688	-0.697249	-0.492597	-0.383866	-0.677067	-0.622385	-0.771352	-0.41936	0.122523	0.240118	0.193695	-0.323309	-0.314709	-0.040846	0.00204387	0.106215	-0.661886	-0.592084	-0.284964	-0.158339	-0.1095	0.0268553	0.0628198	0.0263805	0.186426	-0.364905	-0.105983	-0.084987	0.333165	0.22613	0.178284	0.475754	0.27427	0.35889	0.110806	0.235144	0.178148	0.311365	0.505926	0.51559	0.569618	0.693404	0.638989	0.61006	0.687131	0.75033	0.766423
VWA1	-0.696318	-0.681983	-0.423666	-0.35209	-0.678637	-0.614611	-0.712611	-0.547171	-0.110374	0.0504725	-0.0508238	-0.515261	-0.503502	-0.221723	-0.106615	-0.0361368	-0.565544	-0.553248	-0.190697	-0.210857	-0.147649	-0.0635158	0.131021	0.120287	0.338715	-0.234055	-0.00739574	-0.0398876	0.338125	0.154303	0.407391	0.619136	0.447485	0.520076	0.287122	0.297125	0.298057	0.393269	0.557277	0.530687	0.475803	0.599194	0.480548	0.684027	0.673091	0.749995	0.743185
SNAI2	-0.628469	-0.666209	-0.376479	-0.320556	-0.733434	-0.685769	-0.74631	-0.588022	-0.13624	-0.0443569	-0.196513	-0.672638	-0.706135	-0.408803	-0.238363	-0.194445	-0.425943	-0.446285	-0.031954	-0.0989823	-0.0193337	0.0368686	0.344902	0.303979	0.556759	-0.289956	-0.105318	-0.137769	0.201478	-0.0325008	0.578191	0.708899	0.556645	0.579698	0.308233	0.319275	0.319498	0.395194	0.525447	0.465864	0.522085	0.596507	0.430412	0.799933	0.718961	0.749982	0.741747
PDE1B	-0.691388	-0.68899	-0.4679	-0.368145	-0.700124	-0.651976	-0.781762	-0.443976	0.0977811	0.188157	0.116734	-0.401798	-0.412467	-0.131695	-0.0608746	0.0298393	-0.595745	-0.543366	-0.211041	-0.113185	-0.0564894	0.0647158	0.158622	0.110736	0.288794	-0.381014	-0.142241	-0.124351	0.274457	0.141504	0.264822	0.522241	0.330997	0.39356	0.130021	0.24806	0.194171	0.316683	0.4948	0.488174	0.58357	0.686187	0.607702	0.663634	0.705438	0.749665	0.763802
LPHN1	-0.627518	-0.675591	-0.433761	-0.342388	-0.75475	-0.725101	-0.827208	-0.459051	0.118796	0.1305	0.0187766	-0.521862	-0.578985	-0.284288	-0.172161	-0.101567	-0.473507	-0.44254	-0.0692943	0.010832	0.0812125	0.184647	0.361202	0.27757	0.47842	-0.463884	-0.261289	-0.232512	0.13489	-0.0331549	0.39104	0.583618	0.406103	0.420904	0.115504	0.257714	0.191389	0.301764	0.451771	0.419105	0.649028	0.702067	0.588639	0.765462	0.754191	0.749148	0.76648
PITX1	-0.6678	-0.682164	-0.446574	-0.355239	-0.716177	-0.672085	-0.785513	-0.468355	0.0672064	0.140959	0.0489353	-0.467548	-0.491525	-0.205539	-0.11108	-0.0317246	-0.543815	-0.506913	-0.153879	-0.0845261	-0.0215285	0.0860733	0.229528	0.1751	0.369039	-0.384763	-0.16199	-0.149317	0.233566	0.0781409	0.338352	0.562797	0.380464	0.426887	0.153453	0.260558	0.212149	0.324976	0.4898	0.469713	0.58786	0.675608	0.576643	0.705173	0.717276	0.748988	0.760451
FXYD1	-0.660677	-0.68682	-0.477781	-0.36586	-0.735513	-0.704312	-0.839931	-0.392298	0.223814	0.240513	0.168479	-0.389783	-0.433147	-0.147044	-0.0832785	0.0100641	-0.559574	-0.493953	-0.161065	-0.00459498	0.0543342	0.188633	0.261691	0.177484	0.342632	-0.499282	-0.269458	-0.218551	0.178179	0.0586962	0.239173	0.494098	0.297866	0.334106	0.035389	0.224547	0.134494	0.267043	0.44085	0.434184	0.672188	0.741638	0.670643	0.69592	0.744387	0.748917	0.776202
MS4A6B	-0.636672	-0.66817	-0.386969	-0.326136	-0.726747	-0.678402	-0.747286	-0.571225	-0.111866	-0.017311	-0.159112	-0.63823	-0.66749	-0.372885	-0.214881	-0.165276	-0.448046	-0.459793	-0.0563601	-0.105031	-0.0284635	0.0352618	0.316882	0.276625	0.520204	-0.296121	-0.104613	-0.132056	0.214233	-0.00730112	0.539152	0.685633	0.528924	0.55796	0.289316	0.310846	0.305765	0.386803	0.523031	0.470168	0.525412	0.604603	0.449416	0.780381	0.714627	0.748871	0.742914
NAV1	-0.636843	-0.674998	-0.426723	-0.341472	-0.741186	-0.705017	-0.802688	-0.482854	0.0628544	0.103139	-0.0106277	-0.534004	-0.579074	-0.286278	-0.168575	-0.100473	-0.481935	-0.4583	-0.0832465	-0.0308345	0.0392857	0.135594	0.32641	0.257153	0.465007	-0.414824	-0.210601	-0.19615	0.169872	-0.00621465	0.409878	0.599432	0.425209	0.449017	0.157353	0.268658	0.218033	0.323001	0.473084	0.438893	0.612132	0.677124	0.55831	0.756157	0.738658	0.74861	0.760161
CSF1R	-0.623925	-0.665591	-0.381997	-0.321683	-0.7378	-0.693664	-0.758458	-0.569789	-0.0995167	-0.0229281	-0.171234	-0.65655	-0.695622	-0.398503	-0.234379	-0.187861	-0.425548	-0.439817	-0.0298828	-0.0772589	0.00164954	0.0634017	0.356805	0.308216	0.554474	-0.317766	-0.132816	-0.156154	0.184775	-0.0413969	0.557542	0.693303	0.538524	0.557964	0.280168	0.310625	0.300978	0.380732	0.512057	0.455	0.542057	0.610856	0.450608	0.798827	0.724987	0.748444	0.743935
ITGA11	-0.752825	-0.690167	-0.442091	-0.370182	-0.62204	-0.537635	-0.652352	-0.557474	-0.180531	0.0680619	-0.0040632	-0.433748	-0.374671	-0.106054	-0.0174927	0.0658513	-0.666267	-0.644681	-0.312589	-0.345987	-0.293674	-0.203005	-0.0584935	-0.0278242	0.17942	-0.122337	0.133159	0.0784864	0.478418	0.314136	0.327893	0.585993	0.407384	0.525206	0.338224	0.299671	0.325377	0.424443	0.609732	0.601705	0.388708	0.561467	0.464678	0.595325	0.619102	0.748194	0.733339
AI607873	-0.628613	-0.665454	-0.380117	-0.321849	-0.731298	-0.684367	-0.748186	-0.577871	-0.12031	-0.0314835	-0.179515	-0.657854	-0.691422	-0.395434	-0.230331	-0.184254	-0.431377	-0.447793	-0.0383294	-0.0953347	-0.0168766	0.0426886	0.339192	0.296698	0.544866	-0.297844	-0.111505	-0.1403	0.200754	-0.0274185	0.561168	0.697331	0.543476	0.567323	0.29562	0.314258	0.310617	0.388666	0.520643	0.463675	0.52689	0.601191	0.439879	0.792722	0.717915	0.747989	0.741305
CHST2	-0.639691	-0.671312	-0.407239	-0.334468	-0.729391	-0.685764	-0.769776	-0.527889	-0.0305088	0.0429543	-0.0830548	-0.58113	-0.615073	-0.322527	-0.186184	-0.126727	-0.470667	-0.464438	-0.0773371	-0.0771969	-0.00457919	0.0754878	0.309014	0.257233	0.482291	-0.346863	-0.14747	-0.155749	0.201254	0.00352546	0.469998	0.64044	0.474861	0.504209	0.227522	0.289963	0.26413	0.35707	0.501318	0.458871	0.561789	0.637102	0.501343	0.761925	0.72216	0.747803	0.749927
ENTPD1	-0.620458	-0.669762	-0.41089	-0.332084	-0.751198	-0.717458	-0.803174	-0.501558	0.0371855	0.0677062	-0.0607379	-0.581157	-0.634773	-0.338574	-0.203793	-0.143951	-0.445494	-0.433355	-0.043704	-0.0134807	0.0610476	0.147162	0.373988	0.301156	0.520647	-0.413771	-0.220874	-0.211145	0.143304	-0.0491787	0.463084	0.628965	0.461382	0.474384	0.176844	0.278147	0.232547	0.330214	0.470806	0.42699	0.612221	0.667497	0.533856	0.784517	0.745547	0.747694	0.756934
COL6A3	-0.619493	-0.670254	-0.414589	-0.333315	-0.753509	-0.721341	-0.809704	-0.492355	0.0560858	0.0796589	-0.0463962	-0.571826	-0.627814	-0.331615	-0.200514	-0.139006	-0.447255	-0.431672	-0.0444506	-0.00373852	0.0703039	0.159616	0.378	0.301554	0.517573	-0.427613	-0.233913	-0.219564	0.136498	-0.0516625	0.451187	0.620676	0.451442	0.463176	0.162578	0.273788	0.223159	0.323186	0.464827	0.422611	0.622391	0.675414	0.54513	0.783416	0.748791	0.74762	0.75877
GPC6	-0.645785	-0.676347	-0.432858	-0.345526	-0.732229	-0.693712	-0.796586	-0.476536	0.0660397	0.116379	0.0100397	-0.510823	-0.549251	-0.259093	-0.149436	-0.0776377	-0.501363	-0.473139	-0.105998	-0.0471554	0.0205119	0.120639	0.295041	0.230317	0.433023	-0.40587	-0.195885	-0.181572	0.189504	0.0207812	0.384992	0.585883	0.40914	0.440087	0.154443	0.265208	0.214875	0.322457	0.477177	0.44775	0.604386	0.676404	0.564509	0.738453	0.730969	0.747601	0.759296
MAN2A2	-0.625645	-0.667341	-0.394521	-0.326785	-0.739174	-0.697978	-0.772192	-0.542602	-0.0488214	0.0146545	-0.123742	-0.620695	-0.662641	-0.366909	-0.216356	-0.163705	-0.439578	-0.442632	-0.04303	-0.0599759	0.0164382	0.0883607	0.351659	0.295931	0.530558	-0.349217	-0.159392	-0.170793	0.176719	-0.0345282	0.514206	0.66489	0.504626	0.524285	0.241596	0.29751	0.274949	0.362098	0.498394	0.44786	0.564499	0.630891	0.482819	0.787008	0.729414	0.747537	0.748062
KCNN3	-0.65178	-0.673949	-0.416368	-0.340335	-0.719185	-0.672796	-0.76414	-0.518538	-0.0226619	0.0624518	-0.0536619	-0.550095	-0.575996	-0.286499	-0.161094	-0.0964728	-0.496608	-0.483771	-0.106887	-0.096365	-0.0269176	0.0588031	0.269776	0.223049	0.441049	-0.33851	-0.131296	-0.138839	0.225423	0.0378087	0.436121	0.622092	0.452738	0.491066	0.221191	0.284992	0.258499	0.35539	0.505993	0.469952	0.554515	0.638517	0.51218	0.739808	0.713765	0.74738	0.750074
THBS3	-0.67437	-0.672144	-0.393112	-0.335797	-0.685697	-0.621762	-0.697544	-0.591118	-0.185684	-0.0236277	-0.149824	-0.598355	-0.593188	-0.307446	-0.161427	-0.105956	-0.510704	-0.521511	-0.134708	-0.207594	-0.137483	-0.0743177	0.18698	0.179154	0.42038	-0.202342	0.00659858	-0.0421687	0.315688	0.10067	0.504509	0.675715	0.517074	0.577477	0.343631	0.318707	0.337283	0.417243	0.565664	0.522574	0.45295	0.567626	0.421843	0.723421	0.673901	0.7471	0.733055
LAYN	-0.644708	-0.671798	-0.410188	-0.336534	-0.72374	-0.678601	-0.76526	-0.52515	-0.0308572	0.049146	-0.0728393	-0.568724	-0.598574	-0.30764	-0.17553	-0.114168	-0.481436	-0.472977	-0.0902632	-0.0876497	-0.0164066	0.0654516	0.290467	0.241719	0.464151	-0.340012	-0.137479	-0.146367	0.213223	0.0192826	0.456949	0.633413	0.466637	0.500214	0.227425	0.288389	0.263314	0.357448	0.504183	0.464295	0.555982	0.635555	0.50342	0.751645	0.71713	0.746976	0.748961
SDPR	-0.688921	-0.693213	-0.504607	-0.381614	-0.712001	-0.675879	-0.832933	-0.357096	0.266523	0.30373	0.259462	-0.300235	-0.326384	-0.0482375	-0.0164285	0.0917706	-0.625923	-0.539607	-0.235645	-0.0404496	0.0098872	0.162109	0.168286	0.0923421	0.235365	-0.494932	-0.24484	-0.186442	0.229957	0.141232	0.139527	0.437422	0.229948	0.287014	0.00189488	0.206474	0.108662	0.253845	0.444625	0.455954	0.665791	0.754092	0.710876	0.638472	0.726544	0.746891	0.777928
DTX3	-0.742667	-0.694483	-0.480139	-0.382724	-0.64434	-0.576048	-0.718293	-0.461479	0.0146077	0.192151	0.145321	-0.335235	-0.300116	-0.0320515	0.0178538	0.118542	-0.68515	-0.627741	-0.321731	-0.246542	-0.199498	-0.075701	-0.0196397	-0.025864	0.14494	-0.264023	-9.89e-05	-0.00714447	0.409312	0.29035	0.202935	0.498791	0.303204	0.408395	0.190645	0.254123	0.228032	0.351493	0.547719	0.556578	0.492336	0.642254	0.580712	0.58181	0.651121	0.746414	0.751259
EDNRB	-0.609754	-0.663862	-0.394587	-0.323514	-0.752074	-0.717747	-0.792007	-0.524763	-0.00554377	0.0285154	-0.112117	-0.622153	-0.677646	-0.380165	-0.229897	-0.177743	-0.418886	-0.418828	-0.0177309	-0.0162301	0.0615306	0.136517	0.397121	0.327328	0.558361	-0.392494	-0.208384	-0.208126	0.135782	-0.0724971	0.511819	0.657312	0.49669	0.504659	0.208579	0.289416	0.254155	0.34365	0.476416	0.424441	0.596246	0.648428	0.501163	0.801593	0.743171	0.745075	0.750158
NISCH	-0.728801	-0.692832	-0.484959	-0.381759	-0.658703	-0.598003	-0.743476	-0.4362	0.0732385	0.217897	0.171846	-0.326146	-0.305273	-0.035424	0.0100738	0.112356	-0.67025	-0.606172	-0.30134	-0.198295	-0.150608	-0.0203946	0.0237481	0.00136733	0.165306	-0.317125	-0.0568711	-0.0486758	0.367006	0.255404	0.187476	0.48336	0.285363	0.379234	0.146311	0.242491	0.199765	0.328069	0.522696	0.53217	0.531632	0.667	0.609929	0.59363	0.667292	0.745038	0.75597
X2610203C20RIK	-0.65926	-0.681971	-0.466985	-0.361147	-0.726288	-0.691749	-0.820781	-0.410551	0.180623	0.21273	0.135834	-0.408219	-0.446033	-0.161515	-0.0899796	-0.000822899	-0.552724	-0.495084	-0.158675	-0.02632	0.0333493	0.159834	0.251135	0.175449	0.347372	-0.465736	-0.238919	-0.198553	0.192453	0.0640716	0.264127	0.509714	0.318207	0.357113	0.0668654	0.232977	0.154589	0.281187	0.451744	0.44159	0.64586	0.719979	0.641965	0.694433	0.733049	0.744971	0.767864
EBF1	-0.638847	-0.675655	-0.44519	-0.348709	-0.739339	-0.707318	-0.819703	-0.439342	0.139412	0.161528	0.0642747	-0.474474	-0.522609	-0.233295	-0.137728	-0.0600068	-0.504707	-0.463519	-0.106546	-0.00747283	0.0582582	0.170184	0.312366	0.233357	0.422185	-0.459268	-0.247418	-0.215087	0.160486	0.00864489	0.33922	0.552489	0.370166	0.395419	0.0983531	0.247485	0.177655	0.293838	0.451681	0.428207	0.642587	0.704923	0.605961	0.732961	0.741622	0.744637	0.763743
MMP13	-0.626624	-0.659696	-0.362255	-0.31434	-0.720953	-0.668851	-0.720774	-0.611891	-0.193177	-0.0807975	-0.239215	-0.696443	-0.722492	-0.427358	-0.246833	-0.208387	-0.417146	-0.447942	-0.0291825	-0.127922	-0.0473549	-0.00141367	0.330359	0.300771	0.562355	-0.245458	-0.0647289	-0.11109	0.220617	-0.0249348	0.610589	0.729138	0.58311	0.609801	0.349674	0.33028	0.345908	0.413777	0.539792	0.475698	0.48709	0.567782	0.392571	0.797505	0.703715	0.744603	0.730575
SOX18	-0.72652	-0.680913	-0.422191	-0.357059	-0.635876	-0.556658	-0.656998	-0.572401	-0.197049	0.0304139	-0.0594269	-0.488329	-0.443578	-0.171227	-0.0629408	0.0102979	-0.615188	-0.606236	-0.257516	-0.311304	-0.253557	-0.174209	0.0113828	0.0334964	0.252715	-0.133854	0.10584	0.049313	0.433365	0.251196	0.388737	0.616674	0.446289	0.547518	0.350123	0.307483	0.335169	0.426072	0.598587	0.578833	0.397285	0.553804	0.440119	0.631317	0.629535	0.744155	0.728009
EHD3	-0.623553	-0.668007	-0.414807	-0.333931	-0.742736	-0.708152	-0.798125	-0.491412	0.0467134	0.0812528	-0.04059	-0.559036	-0.6088	-0.315685	-0.18847	-0.125685	-0.457624	-0.441019	-0.0594404	-0.0207678	0.0515628	0.141199	0.352426	0.281587	0.495221	-0.411335	-0.214991	-0.203565	0.153473	-0.0314099	0.43928	0.613668	0.444418	0.461766	0.168425	0.272852	0.225654	0.325633	0.469223	0.429502	0.608307	0.667277	0.540294	0.76855	0.73835	0.74376	0.753817
LAMC1	-0.61565	-0.669788	-0.429962	-0.338215	-0.756908	-0.730614	-0.831135	-0.450308	0.134684	0.132728	0.0194111	-0.523571	-0.586977	-0.292905	-0.180075	-0.110808	-0.458713	-0.427558	-0.0545363	0.0312295	0.102172	0.205471	0.382943	0.293381	0.492528	-0.47992	-0.281928	-0.248664	0.114091	-0.0531177	0.392345	0.579544	0.403454	0.412174	0.102201	0.253551	0.182528	0.292666	0.439474	0.405544	0.659108	0.704851	0.591146	0.769864	0.756455	0.743738	0.76275
RCN3	-0.619027	-0.670915	-0.435982	-0.34117	-0.754849	-0.728806	-0.833981	-0.439649	0.15221	0.148982	0.0410949	-0.505056	-0.567427	-0.274531	-0.16851	-0.0961195	-0.469207	-0.433013	-0.0656446	0.0319937	0.101404	0.209188	0.371967	0.281411	0.475269	-0.487613	-0.286262	-0.249136	0.117361	-0.0428129	0.370849	0.566352	0.387678	0.398608	0.088768	0.248297	0.173132	0.28649	0.43634	0.405956	0.664264	0.711333	0.603645	0.760886	0.755772	0.74331	0.764011
SCUBE1	-0.611576	-0.658419	-0.372602	-0.315226	-0.737565	-0.695197	-0.754492	-0.572496	-0.106924	-0.0368361	-0.190412	-0.671837	-0.71508	-0.418535	-0.2484	-0.205727	-0.405858	-0.424677	-0.0114192	-0.0666591	0.0136291	0.0708349	0.377158	0.32653	0.575712	-0.31776	-0.139261	-0.163694	0.169699	-0.0615861	0.575847	0.700336	0.549437	0.563452	0.284324	0.311904	0.303651	0.379905	0.506072	0.445274	0.540213	0.603537	0.438231	0.805997	0.723581	0.742567	0.737401
ATP1B2	-0.658972	-0.681268	-0.473326	-0.36336	-0.724742	-0.691882	-0.826295	-0.393402	0.2097	0.234616	0.164033	-0.385219	-0.424274	-0.141435	-0.0783516	0.0143102	-0.560369	-0.496152	-0.167003	-0.0170349	0.0409112	0.17315	0.245948	0.166544	0.33102	-0.48231	-0.252977	-0.205802	0.188246	0.0692168	0.237083	0.491238	0.296929	0.336212	0.044183	0.224594	0.138937	0.269621	0.442842	0.436731	0.656799	0.729675	0.659265	0.68489	0.733318	0.742445	0.768204
HECW2	-0.640112	-0.665438	-0.396217	-0.329914	-0.715283	-0.667134	-0.745032	-0.546512	-0.0793835	0.0148431	-0.114402	-0.594802	-0.62029	-0.330671	-0.187933	-0.13225	-0.468163	-0.469766	-0.0813918	-0.107148	-0.0344928	0.0376275	0.287007	0.24649	0.477582	-0.305062	-0.107599	-0.128082	0.223478	0.0179077	0.490791	0.653713	0.492995	0.527555	0.262753	0.298355	0.286107	0.372873	0.514626	0.469638	0.528471	0.611226	0.469596	0.754069	0.706003	0.742178	0.739273
TMEM204	-0.646703	-0.668128	-0.408432	-0.3359	-0.712412	-0.664992	-0.752121	-0.525314	-0.0432104	0.0474088	-0.0713593	-0.558969	-0.582993	-0.295349	-0.165893	-0.104033	-0.48841	-0.47997	-0.102304	-0.103969	-0.0342071	0.0469295	0.267512	0.224431	0.445179	-0.322238	-0.118213	-0.130642	0.228462	0.0366667	0.44884	0.628044	0.462078	0.500545	0.235218	0.287962	0.267034	0.360313	0.508042	0.469933	0.540391	0.625258	0.495372	0.737686	0.705865	0.741918	0.742521
OLFML3	-0.624629	-0.667197	-0.416952	-0.334841	-0.739286	-0.704573	-0.796744	-0.485619	0.053542	0.0888012	-0.0298298	-0.548053	-0.596492	-0.304761	-0.18136	-0.117078	-0.463019	-0.443994	-0.0663157	-0.0224939	0.0488061	0.140405	0.343653	0.273162	0.483732	-0.412211	-0.214302	-0.201479	0.156841	-0.0241093	0.427224	0.605765	0.435591	0.454623	0.162704	0.26989	0.221285	0.322583	0.467589	0.42987	0.607977	0.668202	0.544597	0.76137	0.735581	0.741916	0.752599
PDPN	-0.631118	-0.672055	-0.440795	-0.345302	-0.741247	-0.710936	-0.820666	-0.438722	0.141191	0.156447	0.0562478	-0.482505	-0.534416	-0.245005	-0.146438	-0.0706402	-0.492667	-0.453324	-0.094314	0.00320758	0.0698273	0.179944	0.328278	0.246466	0.436407	-0.4649	-0.256835	-0.223582	0.148023	-0.00607139	0.348192	0.555351	0.374803	0.39593	0.0963712	0.247257	0.1765	0.291306	0.446244	0.420724	0.645982	0.703875	0.60245	0.738746	0.743056	0.741844	0.761201
PTCH1	-0.696255	-0.682462	-0.459318	-0.365252	-0.678435	-0.624129	-0.750504	-0.458904	0.0480558	0.166478	0.0964178	-0.401009	-0.398581	-0.123029	-0.050624	0.0382697	-0.60426	-0.557356	-0.229212	-0.15481	-0.0997085	0.0152997	0.115485	0.0824017	0.263294	-0.330661	-0.0907221	-0.0858215	0.309731	0.173347	0.270711	0.526862	0.339492	0.41192	0.165138	0.254327	0.215043	0.33247	0.510557	0.504246	0.542576	0.65727	0.57706	0.643122	0.682372	0.74182	0.750718
HSPA12B	-0.711141	-0.678668	-0.428604	-0.356341	-0.650781	-0.580175	-0.685141	-0.541053	-0.127193	0.0630366	-0.0245367	-0.473239	-0.444182	-0.170392	-0.0687735	0.00692447	-0.600481	-0.58288	-0.237181	-0.256966	-0.198927	-0.111415	0.0571495	0.0609698	0.271035	-0.194842	0.0413287	0.00279842	0.386508	0.214431	0.365918	0.595662	0.422132	0.511161	0.297058	0.29293	0.301025	0.398019	0.569312	0.55112	0.441993	0.582439	0.475306	0.641722	0.646796	0.74178	0.732851
SRGN	-0.619038	-0.661563	-0.391193	-0.323767	-0.734358	-0.694116	-0.767638	-0.536768	-0.0448402	0.0154756	-0.122101	-0.616127	-0.65898	-0.365477	-0.216045	-0.163929	-0.433914	-0.436759	-0.040169	-0.0555352	0.0204079	0.0919346	0.353128	0.296598	0.529089	-0.350145	-0.162451	-0.172776	0.171503	-0.03789	0.510216	0.659039	0.500099	0.518495	0.236894	0.294453	0.271005	0.357594	0.492399	0.442077	0.562675	0.627212	0.480302	0.782089	0.724728	0.741228	0.742129
ECM1	-0.607476	-0.66196	-0.403617	-0.32623	-0.750222	-0.718979	-0.801124	-0.497496	0.0410174	0.0619693	-0.0694059	-0.587774	-0.646183	-0.351291	-0.213659	-0.156415	-0.428087	-0.418055	-0.0279006	0.00115175	0.0764131	0.160088	0.392919	0.31652	0.536056	-0.42025	-0.233059	-0.221772	0.126031	-0.0680099	0.471242	0.628829	0.464176	0.471718	0.172144	0.27611	0.229084	0.324732	0.461022	0.414944	0.61454	0.663655	0.527814	0.78803	0.744078	0.740498	0.75019
C1QB	-0.606418	-0.658154	-0.383021	-0.318078	-0.743394	-0.706248	-0.773504	-0.542114	-0.0468706	0.000476041	-0.145501	-0.641665	-0.692658	-0.396768	-0.238335	-0.190687	-0.40935	-0.417434	-0.0125723	-0.0347386	0.0439224	0.110916	0.390508	0.328318	0.566092	-0.361274	-0.181002	-0.190716	0.146642	-0.0707033	0.537879	0.672888	0.517289	0.526873	0.23848	0.297429	0.273237	0.356635	0.485548	0.429741	0.571425	0.627073	0.472491	0.801279	0.73234	0.740404	0.741301
MAML2	-0.636446	-0.671698	-0.441963	-0.346688	-0.733245	-0.700599	-0.811964	-0.439344	0.132279	0.157815	0.0610944	-0.472477	-0.518771	-0.231428	-0.135996	-0.0589118	-0.503268	-0.463034	-0.108144	-0.0126468	0.0526057	0.163168	0.305712	0.228932	0.417325	-0.450735	-0.239773	-0.209274	0.164095	0.0124152	0.33873	0.550721	0.369767	0.396099	0.102497	0.247207	0.179589	0.294548	0.451609	0.428226	0.634415	0.697949	0.599133	0.727155	0.735323	0.740221	0.758557
X4930578C19RIK	-0.639078	-0.666949	-0.413613	-0.336275	-0.719564	-0.676936	-0.767995	-0.504673	0.000327884	0.0702232	-0.0455641	-0.544724	-0.576965	-0.289036	-0.165393	-0.101249	-0.483441	-0.468723	-0.0946373	-0.0740777	-0.00466534	0.0822786	0.288906	0.235569	0.449581	-0.357714	-0.154657	-0.156072	0.203846	0.0198276	0.429506	0.612198	0.44379	0.47628	0.202014	0.278264	0.245382	0.342939	0.490882	0.454745	0.566107	0.642591	0.518208	0.74022	0.714732	0.74015	0.745211
HTRA1	-0.612225	-0.664971	-0.420722	-0.333705	-0.750374	-0.722135	-0.817103	-0.463181	0.103744	0.111106	-0.00649087	-0.538902	-0.599278	-0.306469	-0.187231	-0.12156	-0.45024	-0.425399	-0.0494399	0.0183518	0.0900403	0.187125	0.379436	0.29534	0.499616	-0.456871	-0.262188	-0.236343	0.121003	-0.053202	0.412726	0.591392	0.419299	0.428826	0.124469	0.259491	0.19672	0.302108	0.445696	0.40869	0.640607	0.688507	0.569086	0.77	0.748258	0.739762	0.755644
ABI3BP	-0.635076	-0.672736	-0.450888	-0.349821	-0.737187	-0.70784	-0.825752	-0.417646	0.175355	0.186326	0.0959002	-0.448534	-0.49941	-0.21247	-0.126322	-0.0450714	-0.509323	-0.46078	-0.112422	0.00751113	0.071359	0.189557	0.311063	0.226656	0.406536	-0.48086	-0.267486	-0.226566	0.150908	0.00990829	0.308828	0.530218	0.345301	0.369579	0.0698568	0.236864	0.157928	0.278488	0.438401	0.419197	0.656309	0.715537	0.625146	0.722372	0.741523	0.739683	0.76235
TMEM154	-0.699818	-0.672423	-0.40931	-0.346521	-0.65178	-0.580002	-0.671209	-0.570702	-0.181486	0.0148874	-0.0873997	-0.523257	-0.495675	-0.22015	-0.0996688	-0.0331695	-0.57007	-0.567245	-0.207425	-0.263034	-0.2011	-0.127139	0.0826306	0.0909294	0.315381	-0.166844	0.0592604	0.00856823	0.380119	0.188581	0.425408	0.63101	0.465746	0.549436	0.337639	0.307327	0.328662	0.415734	0.577931	0.549929	0.421316	0.558968	0.435191	0.662222	0.643806	0.739512	0.725286
SERPINH1	-0.615824	-0.666555	-0.428629	-0.337441	-0.749031	-0.721548	-0.822496	-0.4487	0.128965	0.132774	0.0218743	-0.515736	-0.575722	-0.284127	-0.173508	-0.103858	-0.462491	-0.431016	-0.0619408	0.0222188	0.0920873	0.195137	0.368678	0.282341	0.479762	-0.469777	-0.271084	-0.239539	0.122537	-0.0426176	0.385441	0.574436	0.398932	0.410507	0.105263	0.252417	0.183499	0.293202	0.440511	0.407904	0.649627	0.698307	0.586531	0.759972	0.748721	0.739475	0.757818
DCLK2	-0.717594	-0.678822	-0.434735	-0.359814	-0.642297	-0.570266	-0.680729	-0.530956	-0.117156	0.0793082	-0.000489145	-0.447916	-0.413751	-0.142859	-0.0500762	0.0294457	-0.617653	-0.594659	-0.257667	-0.267743	-0.212215	-0.120229	0.0300405	0.0366462	0.240382	-0.191418	0.0498413	0.0129462	0.401126	0.237629	0.338306	0.579236	0.403135	0.498016	0.288653	0.287665	0.294172	0.394223	0.569792	0.556542	0.437867	0.583607	0.484179	0.624069	0.639811	0.739471	0.731387
CADM2	-0.673511	-0.682687	-0.484346	-0.37026	-0.708294	-0.67172	-0.815784	-0.379309	0.219678	0.260639	0.20391	-0.341252	-0.36907	-0.0913548	-0.0435277	0.0559415	-0.594306	-0.521215	-0.207203	-0.0434952	0.00989497	0.149473	0.191007	0.118861	0.273099	-0.469107	-0.229741	-0.181743	0.221022	0.116289	0.189699	0.464413	0.265544	0.317091	0.035432	0.217047	0.130802	0.266488	0.447901	0.45063	0.644549	0.72919	0.671973	0.652177	0.719331	0.739452	0.765896
BDKRB2	-0.656898	-0.663737	-0.387125	-0.329522	-0.689213	-0.630142	-0.703211	-0.579444	-0.164073	-0.0218273	-0.150869	-0.602658	-0.606764	-0.321759	-0.174067	-0.120798	-0.488278	-0.499264	-0.112183	-0.177905	-0.106818	-0.0442328	0.219782	0.203376	0.442647	-0.225146	-0.0231784	-0.065745	0.285079	0.0706008	0.508464	0.671114	0.514744	0.566079	0.325476	0.313175	0.325258	0.404605	0.548117	0.502852	0.467342	0.571264	0.424501	0.730842	0.677446	0.739425	0.727682
PLA2G7	-0.607964	-0.658113	-0.387167	-0.319888	-0.741068	-0.704281	-0.775038	-0.532892	-0.0325604	0.0132404	-0.128402	-0.626592	-0.676953	-0.382321	-0.229346	-0.179362	-0.416554	-0.420691	-0.0206831	-0.0333539	0.0440482	0.114464	0.382325	0.319208	0.552536	-0.367479	-0.184949	-0.191474	0.14827	-0.0633217	0.520576	0.661721	0.504326	0.5154	0.227253	0.292857	0.265286	0.351098	0.482129	0.429102	0.575205	0.63156	0.481829	0.793575	0.731103	0.739075	0.741351
PHXR4	-0.640985	-0.670421	-0.436751	-0.345488	-0.724361	-0.687834	-0.796058	-0.453842	0.0973144	0.140027	0.0418002	-0.480534	-0.51963	-0.233696	-0.134538	-0.0592741	-0.506908	-0.471489	-0.115539	-0.037638	0.027491	0.133316	0.285313	0.21731	0.410055	-0.420225	-0.2088	-0.187205	0.184595	0.0277664	0.351184	0.560484	0.381919	0.413447	0.128427	0.253843	0.196018	0.307357	0.464041	0.439511	0.611148	0.681661	0.579297	0.721343	0.725156	0.739007	0.753734
TNXB	-0.663572	-0.67602	-0.45528	-0.357058	-0.706834	-0.665698	-0.788496	-0.433747	0.118385	0.180342	0.101181	-0.420247	-0.445289	-0.164772	-0.0870512	-0.00158906	-0.555977	-0.507111	-0.170627	-0.0698487	-0.0107055	0.106771	0.214229	0.154299	0.332941	-0.409822	-0.183463	-0.158908	0.227192	0.0904481	0.284651	0.524122	0.337855	0.385608	0.111932	0.243352	0.182541	0.302093	0.471037	0.458899	0.601644	0.687542	0.603695	0.680584	0.711302	0.738801	0.755247
MXRA7	-0.669538	-0.675845	-0.451409	-0.356725	-0.698616	-0.653526	-0.773898	-0.447721	0.0853545	0.164617	0.0844881	-0.426719	-0.444389	-0.165037	-0.0842757	-0.000145615	-0.561756	-0.517068	-0.179724	-0.0951319	-0.0362171	0.0771905	0.192552	0.141291	0.323939	-0.380505	-0.152936	-0.136874	0.248658	0.107377	0.295007	0.533126	0.348687	0.402037	0.136662	0.249767	0.198261	0.314722	0.483905	0.471026	0.579617	0.672862	0.586046	0.674582	0.701963	0.738588	0.751616
SCARF2	-0.706638	-0.666755	-0.376763	-0.335252	-0.630492	-0.545375	-0.613748	-0.648287	-0.343037	-0.0874765	-0.209958	-0.601906	-0.554013	-0.279102	-0.127412	-0.0752989	-0.553882	-0.58055	-0.200746	-0.346072	-0.280127	-0.233699	0.0478338	0.0871206	0.340805	-0.0477897	0.170977	0.0808115	0.437769	0.209658	0.526257	0.700576	0.549795	0.644226	0.459134	0.34399	0.408373	0.475051	0.627949	0.586323	0.333191	0.489897	0.337678	0.670086	0.614548	0.738535	0.707973
FIBIN	-0.706121	-0.682327	-0.465729	-0.369435	-0.6647	-0.607333	-0.739904	-0.45028	0.0503155	0.182179	0.121772	-0.370562	-0.359256	-0.0878909	-0.0258318	0.0674859	-0.627797	-0.575356	-0.258193	-0.176585	-0.124786	-0.00540847	0.0738872	0.0471428	0.221155	-0.316795	-0.070067	-0.0657902	0.335132	0.208316	0.238633	0.508539	0.318543	0.400204	0.162227	0.249545	0.211218	0.331516	0.51507	0.51484	0.530055	0.653811	0.582529	0.618395	0.670193	0.738502	0.747384
ITPKB	-0.700666	-0.68482	-0.483952	-0.375373	-0.677179	-0.627911	-0.773413	-0.404517	0.145255	0.241343	0.192358	-0.325503	-0.326673	-0.0550486	-0.0108611	0.0905616	-0.635216	-0.565787	-0.260168	-0.126239	-0.0766805	0.0585149	0.0966317	0.0513157	0.208284	-0.387287	-0.13693	-0.109379	0.299333	0.193671	0.180759	0.467973	0.269834	0.344547	0.0906451	0.227914	0.164232	0.296227	0.484719	0.492168	0.581991	0.693862	0.638913	0.614386	0.687271	0.738341	0.756833
PLCB1	-0.693178	-0.684462	-0.488808	-0.375734	-0.686118	-0.641679	-0.790488	-0.386079	0.186819	0.261876	0.214736	-0.315243	-0.325144	-0.0525342	-0.0128367	0.0904461	-0.628849	-0.553887	-0.250272	-0.0956549	-0.0460514	0.0944152	0.12129	0.0654935	0.216873	-0.422999	-0.173958	-0.135786	0.273627	0.174342	0.165634	0.455145	0.254712	0.322884	0.0592867	0.219365	0.144089	0.280037	0.468405	0.477149	0.608454	0.711541	0.660914	0.619923	0.697708	0.737794	0.760569
BCAM	-0.651931	-0.673707	-0.454974	-0.354555	-0.716861	-0.680716	-0.803156	-0.421934	0.148467	0.189008	0.107635	-0.423347	-0.458437	-0.176377	-0.0981583	-0.0133225	-0.540063	-0.489383	-0.151076	-0.0378802	0.022431	0.141776	0.248752	0.178576	0.355191	-0.441016	-0.21906	-0.186321	0.196969	0.0616428	0.285152	0.520127	0.333755	0.372743	0.0890929	0.238057	0.168307	0.289326	0.45547	0.441922	0.624731	0.700124	0.616236	0.69251	0.721825	0.737419	0.757051
MYOCD	-0.660312	-0.680526	-0.489093	-0.369342	-0.720557	-0.691117	-0.838652	-0.353926	0.276318	0.286488	0.231287	-0.329893	-0.370782	-0.0918849	-0.0491366	0.0521258	-0.581205	-0.501311	-0.189522	0.00150995	0.055229	0.201223	0.22963	0.142412	0.289372	-0.518984	-0.282846	-0.220208	0.181885	0.0850725	0.172186	0.447742	0.246508	0.287774	-0.00765153	0.205271	0.103097	0.243568	0.423702	0.427482	0.681046	0.752245	0.700069	0.6612	0.73345	0.73727	0.769573
CHRNB1	-0.694289	-0.677453	-0.451463	-0.361505	-0.66944	-0.612813	-0.73498	-0.469142	0.019421	0.148847	0.0765113	-0.409774	-0.402955	-0.129509	-0.0529589	0.0332769	-0.600019	-0.558096	-0.229347	-0.170581	-0.115396	-0.0055276	0.104842	0.0780126	0.262383	-0.306407	-0.0685464	-0.0707102	0.320439	0.179265	0.284014	0.534396	0.350442	0.425192	0.185383	0.258881	0.227525	0.340923	0.516824	0.5087	0.522671	0.640894	0.556944	0.63848	0.672088	0.737	0.742956
TM6SF1	-0.601306	-0.65405	-0.377124	-0.314555	-0.740672	-0.703456	-0.767345	-0.546464	-0.0586216	-0.0102676	-0.158973	-0.65031	-0.70151	-0.406423	-0.244395	-0.199014	-0.400718	-0.412073	-0.00567386	-0.035692	0.043533	0.107226	0.394929	0.333912	0.573932	-0.353775	-0.176535	-0.188872	0.144356	-0.0764625	0.549052	0.678051	0.524942	0.533215	0.246431	0.299406	0.278212	0.359054	0.485374	0.42758	0.564646	0.619351	0.46166	0.802717	0.728772	0.736865	0.736595
IGSF6	-0.635006	-0.67034	-0.450202	-0.349321	-0.731602	-0.70155	-0.82	-0.415551	0.172981	0.187456	0.0990126	-0.441929	-0.490553	-0.205447	-0.121256	-0.0395845	-0.512131	-0.463041	-0.117815	0.00192772	0.0649449	0.183245	0.301099	0.218692	0.396971	-0.474768	-0.260847	-0.220739	0.156335	0.0172471	0.302676	0.525665	0.341046	0.36726	0.0707099	0.235596	0.157718	0.278167	0.438514	0.420419	0.65032	0.711445	0.622776	0.715014	0.736127	0.736479	0.75884
PLEKHH2	-0.612797	-0.664206	-0.430311	-0.337268	-0.747404	-0.721289	-0.824356	-0.438493	0.14497	0.143226	0.0352348	-0.504308	-0.565771	-0.275549	-0.168988	-0.0980085	-0.462997	-0.428443	-0.0634364	0.0297795	0.0988086	0.20438	0.369054	0.280171	0.473486	-0.479347	-0.280522	-0.245111	0.117068	-0.0432717	0.372258	0.564132	0.387821	0.398595	0.0922943	0.24739	0.174417	0.285828	0.433645	0.402798	0.655303	0.702164	0.594115	0.754911	0.747967	0.736208	0.756137
GRK5	-0.620365	-0.661717	-0.414008	-0.332429	-0.73204	-0.697324	-0.789211	-0.481097	0.0529325	0.0891641	-0.0277316	-0.541191	-0.588443	-0.299451	-0.177858	-0.113762	-0.461172	-0.441904	-0.0681914	-0.0243238	0.046125	0.13728	0.337273	0.26796	0.476295	-0.40741	-0.210565	-0.197988	0.157819	-0.0209294	0.421263	0.599429	0.430458	0.450134	0.161401	0.267364	0.219333	0.319998	0.464256	0.427326	0.601757	0.662293	0.540384	0.753085	0.728478	0.735568	0.746126
PXDN	-0.607136	-0.661937	-0.423818	-0.333603	-0.749809	-0.724152	-0.82248	-0.446784	0.131657	0.128281	0.0148108	-0.522218	-0.585968	-0.29476	-0.181596	-0.113852	-0.449979	-0.420163	-0.049841	0.0332918	0.10389	0.205183	0.383977	0.294804	0.492781	-0.475388	-0.280702	-0.24802	0.109648	-0.0571871	0.392909	0.575796	0.402229	0.409646	0.102267	0.251507	0.181486	0.289795	0.434064	0.399593	0.652514	0.696601	0.58279	0.764341	0.749091	0.735496	0.754172
WFDC1	-0.614709	-0.662894	-0.424937	-0.335517	-0.741948	-0.713165	-0.812713	-0.451317	0.116285	0.126414	0.0158017	-0.515175	-0.572123	-0.282542	-0.17146	-0.10265	-0.462193	-0.432381	-0.0650313	0.0128272	0.0822219	0.183257	0.358642	0.275945	0.473728	-0.456539	-0.25845	-0.230162	0.129777	-0.036094	0.386986	0.574528	0.400625	0.414208	0.113662	0.253364	0.188201	0.296201	0.442826	0.410151	0.638071	0.689194	0.576981	0.753588	0.741238	0.735394	0.752397
IFNAR2	-0.615388	-0.65931	-0.404273	-0.327684	-0.733333	-0.697843	-0.782521	-0.497789	0.0234275	0.0634266	-0.0614241	-0.568515	-0.616408	-0.32614	-0.194338	-0.13505	-0.445894	-0.434519	-0.0528184	-0.0282539	0.044341	0.128352	0.350592	0.283788	0.500112	-0.392372	-0.200545	-0.194606	0.155247	-0.0341453	0.453534	0.619154	0.45437	0.471406	0.183727	0.275505	0.234655	0.330132	0.469788	0.427607	0.591049	0.650392	0.519447	0.764766	0.727629	0.73536	0.743041
CLEC1A	-0.719815	-0.672336	-0.413199	-0.351664	-0.624751	-0.544365	-0.64074	-0.576241	-0.217394	0.0166564	-0.0743884	-0.491893	-0.44423	-0.175339	-0.0645533	0.00610572	-0.607384	-0.602333	-0.255477	-0.320821	-0.263378	-0.188533	0.00371453	0.0303396	0.250734	-0.11469	0.121667	0.0601898	0.438145	0.253516	0.396458	0.618264	0.451695	0.553867	0.363042	0.30883	0.34232	0.429498	0.599082	0.578022	0.379553	0.537543	0.421719	0.62365	0.617459	0.735314	0.717053
DOCK10	-0.633092	-0.666854	-0.436818	-0.343697	-0.726389	-0.692857	-0.801973	-0.442014	0.119339	0.149585	0.0522901	-0.474313	-0.518493	-0.233217	-0.136397	-0.060759	-0.499496	-0.461567	-0.107856	-0.0195001	0.0455198	0.153426	0.299761	0.226016	0.41515	-0.438383	-0.229141	-0.20183	0.168161	0.0150338	0.343061	0.551747	0.372986	0.400248	0.110863	0.248186	0.184278	0.297041	0.452546	0.428486	0.623224	0.688062	0.588042	0.722179	0.727904	0.735178	0.752166
RBP4	-0.612157	-0.651318	-0.36176	-0.310649	-0.720314	-0.673112	-0.727015	-0.58887	-0.155173	-0.0627376	-0.217984	-0.680216	-0.713777	-0.421255	-0.246419	-0.207007	-0.405704	-0.43157	-0.0192563	-0.0992724	-0.019531	0.0302179	0.349033	0.310567	0.564398	-0.273654	-0.0965184	-0.13316	0.194892	-0.042525	0.591292	0.70986	0.563743	0.584147	0.318549	0.319065	0.324502	0.394833	0.518997	0.456578	0.50433	0.576152	0.406473	0.793408	0.704517	0.735139	0.724965
TLR8	-0.68945	-0.663427	-0.382464	-0.33383	-0.645257	-0.569182	-0.641924	-0.615623	-0.271305	-0.0546686	-0.175025	-0.586766	-0.555312	-0.279198	-0.134142	-0.0797748	-0.53708	-0.555099	-0.178539	-0.289223	-0.222953	-0.168439	0.0961007	0.116409	0.360627	-0.110497	0.104065	0.0324301	0.388268	0.170435	0.503411	0.67876	0.525109	0.606579	0.40438	0.32879	0.373042	0.445718	0.596916	0.556708	0.378785	0.518487	0.37284	0.680629	0.63168	0.735087	0.711938
IGHG2B	-0.644601	-0.661639	-0.401493	-0.332321	-0.700037	-0.650266	-0.734584	-0.530843	-0.067111	0.0349108	-0.0837478	-0.559375	-0.578046	-0.293863	-0.163075	-0.102925	-0.487238	-0.482123	-0.107069	-0.12083	-0.0517933	0.0254433	0.250398	0.213885	0.435692	-0.298101	-0.0953515	-0.113875	0.241218	0.0476116	0.453199	0.629259	0.4663	0.50821	0.251218	0.29008	0.27615	0.366178	0.512499	0.474013	0.519482	0.608639	0.477524	0.727051	0.692679	0.734801	0.73289
GPIHBP1	-0.775324	-0.686332	-0.461435	-0.381115	-0.582131	-0.491199	-0.625448	-0.520494	-0.153676	0.124229	0.0821873	-0.33583	-0.254509	0.000764905	0.0558687	0.152919	-0.730604	-0.68999	-0.393258	-0.395358	-0.353156	-0.247399	-0.171288	-0.126646	0.0564402	-0.0967925	0.177203	0.125838	0.54027	0.408352	0.223344	0.52245	0.335766	0.477634	0.313398	0.279986	0.303068	0.412087	0.612803	0.623609	0.361648	0.556642	0.489028	0.521073	0.584555	0.734471	0.721623
TMEM47	-0.642998	-0.674623	-0.478167	-0.361523	-0.730024	-0.704625	-0.844354	-0.358622	0.275058	0.268554	0.203424	-0.359442	-0.410468	-0.129362	-0.0760486	0.0196332	-0.549706	-0.4761	-0.15521	0.0280569	0.0849246	0.225303	0.275362	0.181045	0.333754	-0.532737	-0.306244	-0.242541	0.150173	0.0442903	0.204489	0.462734	0.265955	0.29616	-0.00715609	0.207943	0.104602	0.241032	0.41357	0.410767	0.691075	0.750939	0.68982	0.68294	0.741231	0.734337	0.766747
SSPN	-0.68696	-0.672767	-0.440894	-0.355793	-0.668478	-0.611459	-0.726553	-0.482535	-0.00706435	0.124856	0.0454125	-0.433508	-0.427541	-0.153861	-0.0681858	0.0133071	-0.583454	-0.548894	-0.213931	-0.172829	-0.11584	-0.012888	0.117532	0.092862	0.283872	-0.292225	-0.0599309	-0.0679968	0.316215	0.165792	0.312683	0.550531	0.37108	0.442929	0.204709	0.265317	0.240465	0.348722	0.519698	0.506741	0.511507	0.627962	0.536003	0.647224	0.669158	0.734146	0.737511
THBD	-0.624806	-0.664984	-0.436247	-0.341763	-0.733007	-0.702881	-0.811562	-0.434133	0.139233	0.154913	0.0559749	-0.476833	-0.527878	-0.241623	-0.144283	-0.0692013	-0.488122	-0.449132	-0.0941353	0.0022693	0.0681089	0.177104	0.323523	0.242855	0.430704	-0.459226	-0.253173	-0.220419	0.147394	-0.00493202	0.343957	0.549233	0.370552	0.391759	0.0956849	0.244649	0.174807	0.288423	0.441862	0.416738	0.638551	0.696162	0.595961	0.730314	0.734815	0.733965	0.753064
TSPAN4	-0.595272	-0.649381	-0.366101	-0.308918	-0.73804	-0.699689	-0.756265	-0.562015	-0.0905769	-0.0364858	-0.192226	-0.674395	-0.72499	-0.42995	-0.258541	-0.218008	-0.385753	-0.405028	0.00747786	-0.0427286	0.0381835	0.0943964	0.402957	0.345708	0.592879	-0.334362	-0.162298	-0.181975	0.144383	-0.0862143	0.578673	0.695272	0.546894	0.553439	0.269837	0.306815	0.293703	0.368967	0.490552	0.427953	0.54952	0.603923	0.437943	0.809884	0.724023	0.733947	0.730513
OLFR1372.PS1	-0.679404	-0.661529	-0.382724	-0.331872	-0.654122	-0.582518	-0.655327	-0.604274	-0.243038	-0.0456128	-0.167519	-0.5881	-0.565536	-0.288107	-0.143142	-0.0890746	-0.523777	-0.539767	-0.161994	-0.260633	-0.193436	-0.136882	0.126064	0.13714	0.379147	-0.139004	0.0719223	0.0079042	0.361576	0.145556	0.502172	0.674199	0.520226	0.594054	0.382932	0.32367	0.359606	0.433862	0.582823	0.541639	0.399873	0.530313	0.385102	0.690634	0.641098	0.733902	0.713735
FAM26E	-0.627864	-0.666026	-0.441036	-0.344197	-0.731219	-0.701147	-0.813499	-0.426171	0.15215	0.167432	0.0727963	-0.462305	-0.512267	-0.226935	-0.134931	-0.0573743	-0.496858	-0.453964	-0.103398	0.00197961	0.0665959	0.179068	0.314007	0.232835	0.416621	-0.464453	-0.255615	-0.220058	0.150819	0.0039438	0.327146	0.539084	0.358356	0.381541	0.0858062	0.240714	0.167864	0.283979	0.439902	0.417592	0.64204	0.700991	0.605492	0.723051	0.734092	0.733772	0.754109
DENND5A	-0.617153	-0.664456	-0.439236	-0.341389	-0.741834	-0.716076	-0.826626	-0.419964	0.172971	0.169662	0.0710264	-0.472175	-0.531507	-0.244012	-0.149053	-0.0730467	-0.479673	-0.436876	-0.0822373	0.0301629	0.0964418	0.209153	0.348998	0.258947	0.443031	-0.490129	-0.286111	-0.244579	0.122975	-0.0253014	0.33557	0.540875	0.360719	0.37536	0.0703101	0.238164	0.158717	0.275161	0.427733	0.402894	0.661627	0.710842	0.613069	0.737774	0.744669	0.733666	0.756273
NKX2.3	-0.614519	-0.653378	-0.378529	-0.317464	-0.721398	-0.67804	-0.74469	-0.552069	-0.0873952	-0.0120543	-0.153698	-0.631098	-0.668189	-0.377777	-0.22146	-0.173736	-0.425024	-0.435736	-0.0377371	-0.0768834	-0.000611184	0.0628295	0.340662	0.292894	0.530877	-0.31505	-0.131261	-0.151981	0.184894	-0.0321997	0.532177	0.671056	0.517596	0.538585	0.266857	0.301278	0.289513	0.369776	0.500699	0.447208	0.533654	0.602531	0.449459	0.7765	0.709732	0.733514	0.730059
GPR4	-0.652713	-0.655162	-0.36553	-0.319955	-0.675239	-0.610401	-0.669646	-0.616676	-0.247102	-0.078215	-0.218732	-0.644953	-0.640385	-0.357227	-0.192346	-0.14796	-0.470627	-0.498038	-0.101505	-0.214836	-0.141559	-0.094756	0.208801	0.207269	0.461174	-0.164359	0.0306104	-0.0319687	0.307124	0.0734072	0.563448	0.70549	0.558545	0.613031	0.386457	0.330586	0.364726	0.432181	0.568459	0.51519	0.420269	0.531251	0.369036	0.734032	0.659095	0.733329	0.713201
CYBB	-0.607538	-0.652355	-0.378528	-0.316065	-0.728268	-0.688035	-0.754452	-0.545098	-0.0686194	-0.00676542	-0.149971	-0.63371	-0.6772	-0.385596	-0.228777	-0.181452	-0.415126	-0.424755	-0.0252607	-0.0567125	0.0203695	0.0849851	0.362875	0.308599	0.545526	-0.334922	-0.153832	-0.169431	0.165856	-0.050572	0.533111	0.669145	0.515542	0.530973	0.252742	0.298196	0.280813	0.362023	0.49123	0.436769	0.548575	0.610836	0.457564	0.78469	0.716891	0.733153	0.731693
EMR1	-0.604267	-0.648003	-0.355927	-0.30671	-0.723172	-0.677437	-0.727384	-0.592162	-0.159414	-0.0728326	-0.23268	-0.694136	-0.731541	-0.438371	-0.258417	-0.221788	-0.391366	-0.420615	-0.00431474	-0.0897324	-0.00861892	0.0380081	0.367537	0.326794	0.583545	-0.276464	-0.103827	-0.140916	0.18243	-0.0595278	0.607013	0.717271	0.57356	0.58944	0.321346	0.320775	0.326731	0.394768	0.51532	0.449804	0.506049	0.573377	0.399339	0.802169	0.706474	0.733131	0.722623
FBN1	-0.607495	-0.659014	-0.416653	-0.330746	-0.742657	-0.714226	-0.808178	-0.460361	0.0994722	0.10871	-0.0078109	-0.534358	-0.593326	-0.303305	-0.184955	-0.11995	-0.447114	-0.42285	-0.0503022	0.0153235	0.0863059	0.182164	0.373296	0.290918	0.493691	-0.449617	-0.256462	-0.231722	0.122444	-0.0505457	0.409684	0.586794	0.416391	0.426525	0.125846	0.257767	0.19652	0.300688	0.443089	0.406417	0.632475	0.680814	0.562272	0.762192	0.740465	0.733092	0.748483
CD33	-0.614262	-0.656569	-0.398813	-0.325197	-0.728526	-0.691478	-0.772916	-0.506253	0.00273135	0.0500043	-0.0771469	-0.577143	-0.622399	-0.333051	-0.197558	-0.140335	-0.442201	-0.434683	-0.0514807	-0.0385117	0.0344092	0.114603	0.345547	0.282827	0.502294	-0.376145	-0.185917	-0.185022	0.161838	-0.0317445	0.465362	0.626332	0.463929	0.48218	0.198689	0.279389	0.244143	0.336694	0.474676	0.430819	0.578142	0.639631	0.505361	0.763703	0.721806	0.73302	0.738595
ITGB3	-0.615061	-0.66148	-0.426396	-0.335981	-0.73805	-0.709162	-0.810563	-0.445732	0.122115	0.132961	0.0253323	-0.504844	-0.560512	-0.272475	-0.164907	-0.0948362	-0.466567	-0.434642	-0.0711586	0.0111481	0.0795476	0.182214	0.350316	0.268059	0.462912	-0.456707	-0.257418	-0.227951	0.132757	-0.0294434	0.375847	0.566903	0.392362	0.407466	0.108544	0.250481	0.184172	0.293225	0.440965	0.410112	0.637007	0.689235	0.580145	0.746351	0.737945	0.732978	0.750507
TYROBP	-0.594163	-0.645513	-0.348811	-0.301968	-0.731002	-0.687647	-0.732009	-0.598247	-0.163631	-0.0870492	-0.254397	-0.71734	-0.761337	-0.46595	-0.277813	-0.245139	-0.370694	-0.40482	0.019055	-0.0734862	0.0100375	0.0524683	0.398814	0.353726	0.615551	-0.28429	-0.117896	-0.155079	0.162447	-0.0869328	0.632274	0.730499	0.589716	0.598335	0.324713	0.324059	0.33003	0.395123	0.510655	0.440264	0.512492	0.572654	0.391598	0.819051	0.712973	0.732953	0.722193
TGFBR2	-0.666102	-0.657768	-0.374404	-0.325967	-0.663236	-0.594935	-0.661452	-0.608913	-0.243838	-0.0602278	-0.190543	-0.613438	-0.599376	-0.319624	-0.165724	-0.11616	-0.49847	-0.51961	-0.133676	-0.238592	-0.168669	-0.116589	0.164577	0.169621	0.41672	-0.151209	0.0520637	-0.0110124	0.335505	0.111698	0.529568	0.687579	0.536998	0.601681	0.383502	0.326306	0.361151	0.432249	0.575168	0.528477	0.409295	0.530424	0.377621	0.709928	0.648815	0.732724	0.71268
MMP2	-0.590388	-0.649832	-0.377288	-0.312173	-0.745179	-0.712292	-0.777144	-0.531048	-0.027985	0.00218972	-0.145946	-0.644133	-0.703027	-0.408272	-0.248725	-0.203024	-0.389444	-0.397619	0.00675949	-0.00907421	0.070283	0.136711	0.418039	0.348543	0.584187	-0.380418	-0.206422	-0.210735	0.12004	-0.0964107	0.540188	0.667679	0.51427	0.516041	0.222299	0.292116	0.262325	0.345089	0.469588	0.412032	0.582944	0.629241	0.474129	0.806268	0.734183	0.732563	0.735459
BICC1	-0.589885	-0.651648	-0.388598	-0.316421	-0.74972	-0.720533	-0.793577	-0.505285	0.0232138	0.0369385	-0.103295	-0.614517	-0.678373	-0.384076	-0.236009	-0.185062	-0.398374	-0.396374	-2.53e-05	0.0135358	0.0911036	0.166907	0.4223	0.344073	0.569425	-0.415672	-0.238255	-0.230248	0.106014	-0.0973998	0.503314	0.642883	0.484479	0.484363	0.183616	0.279831	0.236646	0.326298	0.454617	0.402326	0.608699	0.650469	0.505737	0.799864	0.741483	0.732395	0.740429
MMP23	-0.685939	-0.676669	-0.471611	-0.367295	-0.677901	-0.630528	-0.768377	-0.411213	0.131287	0.220477	0.163755	-0.348929	-0.355151	-0.0836687	-0.0304617	0.0656521	-0.609857	-0.547169	-0.235819	-0.114554	-0.0629173	0.0657517	0.123245	0.0759219	0.237982	-0.384981	-0.142886	-0.117808	0.281365	0.167598	0.208492	0.48041	0.287401	0.3553	0.0997263	0.231165	0.170368	0.297426	0.479191	0.481267	0.578518	0.68382	0.621181	0.625688	0.686228	0.732183	0.749394
H2.EB1	-0.610184	-0.659222	-0.419863	-0.332448	-0.739439	-0.710624	-0.807326	-0.454744	0.106537	0.117435	0.00458023	-0.522207	-0.579339	-0.290529	-0.176487	-0.109594	-0.454775	-0.427697	-0.0591927	0.0121277	0.0819712	0.180222	0.362307	0.280587	0.480163	-0.450215	-0.254742	-0.228627	0.127728	-0.0409746	0.396166	0.578613	0.406849	0.419306	0.12018	0.254904	0.192237	0.29807	0.442471	0.408145	0.632257	0.682542	0.567777	0.75455	0.738025	0.73217	0.748203
CYSLTR2	-0.677632	-0.659932	-0.382287	-0.331225	-0.652698	-0.581461	-0.654471	-0.601499	-0.239939	-0.0438368	-0.165065	-0.585214	-0.562963	-0.286256	-0.142201	-0.0880238	-0.522837	-0.538302	-0.161863	-0.258837	-0.191893	-0.135035	0.126017	0.13663	0.377533	-0.140381	0.0701618	0.00690537	0.359934	0.145081	0.499156	0.671308	0.51749	0.591023	0.380085	0.322258	0.35745	0.431846	0.580604	0.539771	0.400124	0.529997	0.385645	0.688603	0.639838	0.732029	0.712162
DGKB	-0.681777	-0.679817	-0.494824	-0.375375	-0.690017	-0.651614	-0.806227	-0.355018	0.244821	0.29434	0.253269	-0.288868	-0.308036	-0.0370592	-0.00732929	0.0994115	-0.623931	-0.539813	-0.244465	-0.0593364	-0.0110593	0.137415	0.141427	0.0733436	0.21369	-0.466031	-0.218084	-0.165429	0.244294	0.157725	0.132783	0.428339	0.225015	0.286647	0.013928	0.204463	0.113671	0.255308	0.444181	0.456704	0.63783	0.730963	0.689663	0.615802	0.704156	0.731507	0.760158
VCAM1	-0.587343	-0.644661	-0.35519	-0.302965	-0.737811	-0.699259	-0.748442	-0.575748	-0.116979	-0.0612163	-0.224563	-0.699669	-0.751631	-0.456146	-0.275089	-0.239529	-0.367874	-0.394782	0.0244921	-0.0436622	0.0392261	0.0883104	0.417967	0.362492	0.616629	-0.321074	-0.154956	-0.180449	0.138668	-0.101647	0.608952	0.712285	0.568549	0.571667	0.289152	0.313447	0.306733	0.376718	0.493077	0.42533	0.539119	0.591225	0.416788	0.81993	0.721752	0.731223	0.725221
SRPX2	-0.595262	-0.651194	-0.387789	-0.317079	-0.741504	-0.709404	-0.782547	-0.510729	0.00540928	0.0319454	-0.106449	-0.610526	-0.668137	-0.375634	-0.228425	-0.177185	-0.40701	-0.406007	-0.0120015	-0.00570885	0.0709042	0.145456	0.400116	0.328253	0.554073	-0.395879	-0.216256	-0.213116	0.123947	-0.0795968	0.501144	0.643181	0.485244	0.490441	0.196555	0.282109	0.244339	0.332917	0.462612	0.411389	0.593178	0.641171	0.496998	0.790225	0.73302	0.73112	0.737249
RAB3IL1	-0.594724	-0.647211	-0.365966	-0.308554	-0.73361	-0.694986	-0.752389	-0.558529	-0.0892732	-0.0336022	-0.187299	-0.667275	-0.716461	-0.42303	-0.253866	-0.212749	-0.388038	-0.406302	0.00310422	-0.0454912	0.0346412	0.0914307	0.39555	0.339309	0.584507	-0.331665	-0.159135	-0.178676	0.14745	-0.0807984	0.571539	0.689928	0.541595	0.549451	0.268001	0.304924	0.291822	0.367346	0.489378	0.427951	0.546176	0.60167	0.437694	0.803455	0.719905	0.731	0.727643
ISLR	-0.620134	-0.665268	-0.453039	-0.347105	-0.73924	-0.715942	-0.837494	-0.389082	0.226189	0.21204	0.125967	-0.427505	-0.487863	-0.203138	-0.124711	-0.0414632	-0.498639	-0.443003	-0.102032	0.0435458	0.106415	0.230521	0.334238	0.238209	0.408396	-0.519322	-0.309066	-0.25525	0.119783	-0.0106344	0.282937	0.506465	0.320285	0.337101	0.0292647	0.223082	0.130457	0.25507	0.413775	0.397088	0.681434	0.72999	0.646992	0.719053	0.745594	0.730919	0.75875
CDH19	-0.676467	-0.677433	-0.488551	-0.371845	-0.691671	-0.653589	-0.803726	-0.362854	0.23157	0.280078	0.233984	-0.305314	-0.32635	-0.0546266	-0.0187808	0.0849136	-0.611911	-0.532287	-0.232183	-0.0568334	-0.00714887	0.137227	0.154386	0.0863198	0.230986	-0.461347	-0.217262	-0.167375	0.238022	0.145417	0.15192	0.439083	0.238413	0.297109	0.0237662	0.208326	0.120546	0.259192	0.444742	0.453922	0.634353	0.725121	0.678481	0.623981	0.704598	0.730524	0.757916
CCDC88A	-0.598391	-0.653189	-0.401252	-0.322813	-0.741543	-0.712014	-0.795359	-0.482664	0.0564773	0.0714799	-0.055893	-0.571225	-0.630685	-0.339954	-0.207514	-0.149583	-0.424023	-0.411124	-0.0286196	0.00902247	0.0827743	0.168066	0.390181	0.311888	0.525327	-0.425904	-0.240519	-0.225491	0.118939	-0.0685953	0.454111	0.61279	0.448982	0.455497	0.157637	0.268512	0.2179	0.314264	0.44964	0.405655	0.614413	0.661089	0.530119	0.775759	0.736299	0.730106	0.741279
EFEMP1	-0.602936	-0.655779	-0.41426	-0.328701	-0.741128	-0.713504	-0.806557	-0.457756	0.101637	0.107914	-0.00895077	-0.534315	-0.594562	-0.305439	-0.186864	-0.122525	-0.441942	-0.418009	-0.0462383	0.0197294	0.0907242	0.186009	0.377678	0.294288	0.496422	-0.451402	-0.260016	-0.23459	0.117313	-0.0554196	0.410089	0.585008	0.415561	0.424193	0.123361	0.256427	0.194568	0.298193	0.439297	0.402238	0.632575	0.679088	0.560463	0.761517	0.738884	0.729825	0.745441
RASIP1	-0.672223	-0.668179	-0.442629	-0.353243	-0.677134	-0.62662	-0.743722	-0.459683	0.0407835	0.145082	0.0665461	-0.424352	-0.430139	-0.156274	-0.0744895	0.00786049	-0.568215	-0.528444	-0.19593	-0.13238	-0.0751023	0.0325386	0.152845	0.115038	0.299606	-0.334305	-0.106202	-0.101786	0.279881	0.136079	0.298931	0.535497	0.354975	0.417135	0.167581	0.254602	0.216286	0.327939	0.496725	0.484263	0.54125	0.645169	0.557198	0.654034	0.679268	0.729524	0.73784
FZD2	-0.647541	-0.670158	-0.469498	-0.35874	-0.71368	-0.682731	-0.818004	-0.376751	0.225383	0.243898	0.177672	-0.366897	-0.406996	-0.129295	-0.071797	0.0213092	-0.554422	-0.487394	-0.167148	-0.00858918	0.0476255	0.181178	0.242606	0.161393	0.319034	-0.487005	-0.26024	-0.209254	0.180129	0.0682264	0.218565	0.473097	0.280227	0.318272	0.0288068	0.216002	0.126802	0.257864	0.429616	0.425694	0.65492	0.724981	0.659845	0.670215	0.723172	0.729476	0.756724
IFI203	-0.66574	-0.669429	-0.454162	-0.356406	-0.688294	-0.644291	-0.769423	-0.427874	0.109004	0.184664	0.112552	-0.397401	-0.413967	-0.139324	-0.0684964	0.018772	-0.568435	-0.517499	-0.191455	-0.0915234	-0.0352635	0.0828656	0.177401	0.124934	0.298369	-0.387769	-0.158582	-0.137204	0.248706	0.118444	0.263138	0.509302	0.323563	0.378815	0.116212	0.239674	0.182853	0.302306	0.473437	0.46534	0.580841	0.674276	0.596435	0.655457	0.693448	0.729431	0.744696
SGCB	-0.609588	-0.657775	-0.423818	-0.333652	-0.73663	-0.70883	-0.809306	-0.442149	0.125985	0.132718	0.0247444	-0.504499	-0.561936	-0.274884	-0.167194	-0.0978279	-0.460409	-0.428684	-0.0661375	0.0172458	0.0856664	0.187849	0.356219	0.272443	0.46639	-0.459972	-0.262759	-0.232149	0.12599	-0.0357173	0.375851	0.564461	0.390939	0.404093	0.104653	0.24867	0.181271	0.289831	0.436078	0.404818	0.638036	0.687866	0.578814	0.745809	0.736512	0.729236	0.747165
NCAM1	-0.641285	-0.667265	-0.45882	-0.353362	-0.715561	-0.684089	-0.81149	-0.394054	0.195187	0.216456	0.141473	-0.396667	-0.438079	-0.158954	-0.0903572	-0.0025259	-0.536741	-0.478179	-0.149216	-0.0108661	0.0477387	0.173627	0.259156	0.180045	0.346198	-0.472525	-0.251524	-0.207244	0.175423	0.0520807	0.253572	0.494158	0.305864	0.340493	0.0516107	0.224463	0.14252	0.268016	0.434565	0.424858	0.644601	0.712701	0.637769	0.683496	0.722758	0.729017	0.753334
FCGR2B	-0.589116	-0.645671	-0.369058	-0.3085	-0.737296	-0.701849	-0.761874	-0.544086	-0.0603039	-0.0182348	-0.169642	-0.656636	-0.711083	-0.417864	-0.252891	-0.210249	-0.384622	-0.39863	0.00777327	-0.0259462	0.0538146	0.114445	0.408675	0.345796	0.58615	-0.354578	-0.182795	-0.195029	0.13133	-0.0913673	0.557619	0.678371	0.528559	0.532576	0.245657	0.298079	0.277088	0.355398	0.477505	0.41754	0.562393	0.612397	0.452381	0.803848	0.724765	0.728927	0.728526
AGTPBP1	-0.68597	-0.671836	-0.457307	-0.361562	-0.666924	-0.614576	-0.743164	-0.439356	0.0686634	0.180398	0.116225	-0.377513	-0.375813	-0.105671	-0.0407709	0.0494766	-0.60147	-0.550317	-0.232609	-0.146253	-0.0933079	0.0243105	0.108975	0.0738164	0.246417	-0.33755	-0.0991598	-0.0893675	0.302682	0.175388	0.246148	0.505104	0.318395	0.390249	0.146033	0.244313	0.200319	0.319064	0.496593	0.493481	0.542237	0.654542	0.581298	0.62602	0.672167	0.728905	0.739766
MGP	-0.610169	-0.656738	-0.41989	-0.332213	-0.733542	-0.704167	-0.802024	-0.450773	0.107203	0.12099	0.0108719	-0.512901	-0.567822	-0.281067	-0.169964	-0.102244	-0.458601	-0.430237	-0.0657365	0.00729294	0.0760927	0.175084	0.351386	0.271343	0.468473	-0.445699	-0.249354	-0.22335	0.132967	-0.0327546	0.386879	0.571947	0.400168	0.414691	0.118647	0.252713	0.19036	0.296532	0.441695	0.408958	0.627267	0.679409	0.567246	0.745941	0.732522	0.728656	0.74468
LMCD1	-0.693246	-0.671247	-0.450676	-0.360416	-0.656086	-0.598316	-0.722584	-0.460577	0.0199751	0.155495	0.0888491	-0.390231	-0.37873	-0.109965	-0.0394764	0.048274	-0.606975	-0.562594	-0.242551	-0.18077	-0.127815	-0.0167116	0.0818432	0.0586898	0.237848	-0.295981	-0.0567067	-0.0592934	0.331116	0.196161	0.264809	0.5201	0.336463	0.415441	0.182521	0.254125	0.223681	0.337511	0.514683	0.509801	0.511091	0.633083	0.554521	0.619688	0.659507	0.728591	0.734439
MEF2C	-0.633746	-0.663368	-0.443679	-0.346004	-0.716941	-0.684133	-0.800412	-0.419931	0.148791	0.176526	0.0894141	-0.438415	-0.480475	-0.199551	-0.115303	-0.0348778	-0.513545	-0.467196	-0.126145	-0.0179218	0.0439215	0.158716	0.278428	0.203532	0.381964	-0.448223	-0.234884	-0.201087	0.17236	0.0326598	0.303064	0.524409	0.342632	0.373468	0.0866405	0.237056	0.166471	0.283894	0.44339	0.425659	0.627143	0.693717	0.604926	0.700797	0.720826	0.728446	0.74823
FOXF2	-0.627528	-0.662855	-0.445331	-0.345406	-0.723944	-0.694456	-0.811671	-0.410222	0.172777	0.186089	0.0986246	-0.436841	-0.485368	-0.203361	-0.120206	-0.0394056	-0.505948	-0.457222	-0.115832	0.00338132	0.0657272	0.182891	0.299144	0.21716	0.393278	-0.471097	-0.259676	-0.219563	0.153291	0.0159357	0.298951	0.519429	0.336795	0.362361	0.0686318	0.232654	0.155149	0.274396	0.432902	0.415009	0.644293	0.704288	0.61671	0.707495	0.728468	0.728277	0.750568
SIRPA	-0.589313	-0.649603	-0.395952	-0.318823	-0.745318	-0.71791	-0.797732	-0.483286	0.0578219	0.0641646	-0.067494	-0.583495	-0.647933	-0.356531	-0.219648	-0.164258	-0.408739	-0.398469	-0.0124051	0.0226269	0.0977238	0.180585	0.411773	0.329833	0.54535	-0.433346	-0.252685	-0.236679	0.103035	-0.0880942	0.467563	0.618219	0.456558	0.457689	0.156148	0.268967	0.217332	0.311909	0.443622	0.396745	0.619457	0.660461	0.525781	0.784942	0.739381	0.727766	0.73918
EHD2	-0.610132	-0.660849	-0.451675	-0.344311	-0.742106	-0.722238	-0.843711	-0.377869	0.247639	0.21927	0.132976	-0.424714	-0.491245	-0.207001	-0.129659	-0.0467262	-0.487485	-0.430135	-0.0904102	0.0644957	0.127607	0.25306	0.353716	0.251235	0.418487	-0.538634	-0.331727	-0.27218	0.0998494	-0.027948	0.278645	0.499464	0.313675	0.324988	0.0120314	0.217757	0.11904	0.24454	0.401139	0.384148	0.694272	0.735896	0.654183	0.722195	0.748968	0.726569	0.756628
AKAP12	-0.652069	-0.66477	-0.449376	-0.351646	-0.695618	-0.655837	-0.777887	-0.422002	0.125066	0.183066	0.106536	-0.408232	-0.433754	-0.158082	-0.0835726	0.00129023	-0.547823	-0.498099	-0.168659	-0.064648	-0.00679754	0.110236	0.211587	0.15115	0.325032	-0.408918	-0.185895	-0.159657	0.220737	0.0884844	0.27373	0.511065	0.327152	0.373701	0.103449	0.237132	0.175072	0.293733	0.460399	0.449323	0.595832	0.679426	0.598717	0.66803	0.700469	0.726162	0.743202
PARP8	-0.625408	-0.660323	-0.441199	-0.343243	-0.720904	-0.690742	-0.805587	-0.414933	0.160582	0.177274	0.0880833	-0.44283	-0.490277	-0.208976	-0.123256	-0.0440018	-0.501776	-0.455634	-0.113273	-0.00125918	0.0613661	0.175934	0.298155	0.218268	0.396306	-0.461917	-0.2521	-0.214892	0.155404	0.0153233	0.307061	0.523789	0.34293	0.368634	0.0772346	0.234797	0.160551	0.277792	0.434803	0.415638	0.636678	0.697303	0.607455	0.707232	0.724754	0.726055	0.747112
GLIPR1	-0.608449	-0.653988	-0.417757	-0.330839	-0.729373	-0.699618	-0.796849	-0.450463	0.102869	0.118794	0.00912412	-0.511208	-0.564931	-0.27955	-0.168661	-0.101332	-0.457636	-0.429825	-0.0668555	0.00403104	0.0724822	0.170628	0.346907	0.268293	0.465004	-0.440224	-0.244478	-0.219595	0.135233	-0.0302337	0.386151	0.57044	0.399562	0.414788	0.121052	0.252372	0.19139	0.296787	0.441434	0.408811	0.621917	0.67481	0.562859	0.741864	0.728241	0.725569	0.741121
VTN	-0.61402	-0.658664	-0.443061	-0.341649	-0.732064	-0.707504	-0.823457	-0.398929	0.199486	0.191981	0.101893	-0.441068	-0.499424	-0.216517	-0.132226	-0.0526564	-0.487678	-0.437954	-0.0949752	0.0345392	0.0980556	0.216157	0.333508	0.241851	0.41619	-0.49935	-0.293235	-0.245721	0.122901	-0.0135987	0.301389	0.515814	0.333899	0.350542	0.0478318	0.227521	0.142014	0.261962	0.416914	0.397236	0.664475	0.713865	0.625712	0.718403	0.736884	0.725018	0.75015
GPR97	-0.677912	-0.665803	-0.443753	-0.354483	-0.663844	-0.610343	-0.730005	-0.457529	0.0311298	0.148919	0.0761705	-0.406633	-0.404597	-0.134567	-0.0583171	0.0259964	-0.582466	-0.540853	-0.215816	-0.153451	-0.0984395	0.0101455	0.120008	0.0890214	0.270126	-0.31513	-0.0832829	-0.0820581	0.301394	0.162371	0.281924	0.52558	0.344675	0.414061	0.173408	0.252969	0.218427	0.330426	0.502035	0.493052	0.524599	0.636077	0.552827	0.634897	0.666544	0.725003	0.732155
DDR2	-0.610227	-0.657757	-0.441525	-0.340289	-0.735025	-0.71167	-0.826424	-0.398426	0.202937	0.190317	0.0983944	-0.446188	-0.507325	-0.223774	-0.137756	-0.059089	-0.481133	-0.432145	-0.0873986	0.0424408	0.106609	0.224114	0.344803	0.250797	0.425859	-0.50538	-0.301189	-0.252521	0.114475	-0.0233167	0.306569	0.517876	0.336561	0.350464	0.045225	0.227404	0.140622	0.26017	0.413682	0.392812	0.66904	0.715455	0.625878	0.723479	0.739645	0.724709	0.750245
SLCO3A1	-0.637774	-0.663621	-0.458909	-0.352386	-0.71156	-0.680961	-0.809747	-0.385419	0.205671	0.223769	0.151506	-0.386058	-0.427894	-0.150775	-0.0857018	0.00300134	-0.536676	-0.475896	-0.151289	-0.00678448	0.0508961	0.178355	0.256469	0.176184	0.338663	-0.476923	-0.256152	-0.209391	0.172461	0.053287	0.242111	0.48465	0.29624	0.330694	0.0424223	0.220091	0.135669	0.262102	0.428775	0.420619	0.645878	0.712995	0.641307	0.676671	0.719413	0.724391	0.74972
EFEMP2	-0.592786	-0.649681	-0.408916	-0.32425	-0.740356	-0.714776	-0.80531	-0.453729	0.10615	0.104544	-0.0143099	-0.538383	-0.602463	-0.314424	-0.194033	-0.131548	-0.42871	-0.40609	-0.0342606	0.0316989	0.103188	0.196862	0.392315	0.305926	0.507731	-0.457386	-0.270332	-0.243331	0.103544	-0.0699484	0.415146	0.584009	0.416704	0.421068	0.118517	0.254421	0.191064	0.293323	0.4312	0.392569	0.63502	0.676636	0.556663	0.763861	0.737817	0.724116	0.740235
COLEC12	-0.622401	-0.662076	-0.461936	-0.350491	-0.728259	-0.705522	-0.835898	-0.363621	0.260328	0.244336	0.170559	-0.384589	-0.441904	-0.162138	-0.0988031	-0.00963396	-0.517145	-0.451381	-0.125332	0.0437085	0.102763	0.235239	0.307002	0.210033	0.367649	-0.530127	-0.314401	-0.253149	0.12671	0.0122372	0.235031	0.474381	0.28432	0.305965	0.00136641	0.210249	0.109948	0.240267	0.404155	0.39516	0.685767	0.737074	0.667514	0.693541	0.737452	0.723846	0.754907
VCAN	-0.582792	-0.638861	-0.356419	-0.302005	-0.730019	-0.692649	-0.745013	-0.560091	-0.0982252	-0.0465979	-0.20425	-0.678296	-0.730118	-0.438329	-0.264451	-0.226828	-0.370677	-0.393078	0.0177265	-0.0387873	0.042193	0.0945906	0.409181	0.352237	0.599379	-0.327751	-0.161135	-0.182313	0.136275	-0.0958622	0.585793	0.694183	0.549805	0.553604	0.272816	0.305498	0.294474	0.366506	0.483799	0.419387	0.540628	0.592015	0.424113	0.806026	0.715277	0.723431	0.719218
SLC12A4	-0.62198	-0.656026	-0.432281	-0.338902	-0.715602	-0.683702	-0.793013	-0.427817	0.130972	0.155981	0.0622256	-0.459051	-0.50402	-0.22361	-0.131262	-0.0556081	-0.492854	-0.452974	-0.107158	-0.0125995	0.0509157	0.159398	0.296798	0.221816	0.405147	-0.440712	-0.234265	-0.204104	0.16095	0.0136874	0.328122	0.536176	0.359173	0.385248	0.0986905	0.240797	0.174364	0.28699	0.440749	0.418365	0.61984	0.682151	0.586398	0.708792	0.717793	0.722734	0.74081
MUSTN1	-0.650318	-0.669665	-0.492243	-0.367583	-0.707891	-0.681602	-0.835626	-0.321355	0.319123	0.317457	0.273114	-0.288451	-0.330831	-0.0585853	-0.0299524	0.0754609	-0.584981	-0.495698	-0.199948	0.0166226	0.0668311	0.219955	0.218379	0.126369	0.259311	-0.538353	-0.301604	-0.228903	0.172287	0.0918167	0.126509	0.411784	0.208941	0.25014	-0.0440054	0.188892	0.0764774	0.221487	0.403281	0.413457	0.689019	0.757119	0.717841	0.636618	0.723506	0.722695	0.759146
HCAR1	-0.62625	-0.642942	-0.356155	-0.310388	-0.681798	-0.624366	-0.679019	-0.600566	-0.215841	-0.0772096	-0.222872	-0.65438	-0.664244	-0.381719	-0.213328	-0.172607	-0.43553	-0.463772	-0.0656911	-0.169324	-0.0942829	-0.0487735	0.260904	0.246214	0.497985	-0.199032	-0.0149198	-0.0683982	0.259901	0.0259792	0.572533	0.700691	0.557322	0.597641	0.360305	0.323024	0.347603	0.41387	0.542436	0.485367	0.442549	0.536925	0.37236	0.747419	0.665538	0.722507	0.705734
LOX	-0.707451	-0.66945	-0.458501	-0.365763	-0.63255	-0.569624	-0.702419	-0.449157	0.0173123	0.175733	0.123486	-0.345015	-0.318944	-0.0572695	-0.00184788	0.0920648	-0.641767	-0.589977	-0.286926	-0.217461	-0.169605	-0.0529711	0.0155846	0.00352563	0.172716	-0.269261	-0.0201839	-0.0252369	0.372179	0.25101	0.218154	0.493151	0.306352	0.399953	0.182234	0.247553	0.220298	0.33759	0.52256	0.526637	0.487202	0.623778	0.558196	0.580219	0.638083	0.721898	0.727089
ID4	-0.665658	-0.667165	-0.471753	-0.362647	-0.682304	-0.642543	-0.782813	-0.380366	0.187817	0.245411	0.191429	-0.331781	-0.350753	-0.0812363	-0.0343963	0.062773	-0.591301	-0.52202	-0.216941	-0.068668	-0.0174465	0.116643	0.158886	0.0970623	0.249542	-0.430924	-0.194332	-0.154619	0.239886	0.135992	0.186479	0.457138	0.263639	0.320858	0.0545053	0.216373	0.140028	0.27077	0.449594	0.453079	0.608798	0.699781	0.643488	0.626698	0.692527	0.721871	0.744876
ITPR1	-0.698842	-0.664734	-0.43869	-0.356407	-0.633593	-0.568403	-0.686595	-0.484584	-0.0468175	0.122254	0.0541996	-0.399911	-0.373717	-0.109738	-0.0336936	0.0505345	-0.61289	-0.577377	-0.258459	-0.22993	-0.177898	-0.0760491	0.0376827	0.0321732	0.217815	-0.234255	0.00521242	-0.0144685	0.371174	0.228243	0.283484	0.533608	0.355362	0.444834	0.230724	0.264759	0.253349	0.35988	0.53587	0.529496	0.462079	0.597699	0.513811	0.602073	0.63471	0.721498	0.7204
TMEM176A	-0.574101	-0.635014	-0.347863	-0.296862	-0.732789	-0.696418	-0.742804	-0.568728	-0.112319	-0.0644166	-0.228823	-0.699844	-0.755198	-0.462459	-0.280585	-0.247074	-0.352818	-0.380929	0.0360585	-0.0319432	0.0509641	0.0981261	0.429776	0.371769	0.624209	-0.324777	-0.163854	-0.187765	0.124586	-0.115191	0.610667	0.70742	0.566631	0.565593	0.283083	0.309793	0.301765	0.369965	0.482486	0.413557	0.538202	0.58528	0.410451	0.817554	0.716515	0.721473	0.715955
HLF	-0.658682	-0.669246	-0.489784	-0.368192	-0.695841	-0.664765	-0.817848	-0.333266	0.286039	0.305365	0.2625	-0.287215	-0.319841	-0.0499249	-0.0208354	0.084314	-0.596641	-0.510227	-0.216479	-0.0145926	0.0345308	0.184581	0.185738	0.104171	0.239398	-0.504884	-0.265257	-0.201366	0.200485	0.117856	0.128855	0.416157	0.214569	0.263784	-0.0196047	0.194138	0.0914559	0.234007	0.417375	0.428337	0.663251	0.741093	0.701075	0.624051	0.710704	0.721415	0.754376
CPT1C	-0.703899	-0.665243	-0.43925	-0.357603	-0.62804	-0.560682	-0.679599	-0.487873	-0.0578847	0.120578	0.0544084	-0.395331	-0.364431	-0.101612	-0.026884	0.0580015	-0.621039	-0.585646	-0.268737	-0.244142	-0.192924	-0.0913724	0.0202835	0.0193032	0.204887	-0.220925	0.02079	-0.00202865	0.385035	0.242652	0.279772	0.532906	0.354516	0.448214	0.238899	0.266112	0.258175	0.3644	0.541927	0.536728	0.451825	0.592284	0.509394	0.594665	0.629133	0.721292	0.718993
H2.AA	-0.592313	-0.641719	-0.375736	-0.311167	-0.723354	-0.687248	-0.754758	-0.523686	-0.038337	0.00734654	-0.132555	-0.617265	-0.666461	-0.378687	-0.227231	-0.179476	-0.403363	-0.409102	-0.0170668	-0.0336629	0.0423177	0.10949	0.375637	0.314669	0.544085	-0.35512	-0.178033	-0.185889	0.144398	-0.0643679	0.51489	0.649983	0.497286	0.507604	0.226729	0.287567	0.262273	0.344891	0.471797	0.418941	0.558822	0.613651	0.465606	0.776796	0.713168	0.721187	0.722766
FLT3L	-0.654695	-0.660624	-0.444239	-0.349839	-0.68245	-0.639066	-0.759155	-0.430343	0.0961145	0.170581	0.0950184	-0.407137	-0.424905	-0.152471	-0.0772228	0.00659876	-0.552816	-0.506225	-0.179542	-0.0891242	-0.032277	0.0811525	0.185811	0.134102	0.309446	-0.379228	-0.155549	-0.136888	0.241489	0.107443	0.276566	0.51323	0.33163	0.384019	0.123776	0.240586	0.187065	0.302748	0.469385	0.458582	0.571507	0.662206	0.580661	0.655409	0.68652	0.721174	0.735158
X1700018A04RIK	-0.657134	-0.647139	-0.366761	-0.320447	-0.650188	-0.581698	-0.646043	-0.604429	-0.25175	-0.0654607	-0.194401	-0.607062	-0.59095	-0.315947	-0.163037	-0.114915	-0.491598	-0.5141	-0.133636	-0.2429	-0.174054	-0.124427	0.155841	0.16364	0.408459	-0.138894	0.0612779	-0.00377976	0.336757	0.114563	0.525985	0.680441	0.533032	0.598307	0.386243	0.323528	0.361084	0.429829	0.570323	0.523883	0.395371	0.516814	0.365064	0.697344	0.63554	0.721001	0.700064
FERMT2	-0.632487	-0.662387	-0.470473	-0.35554	-0.715209	-0.689979	-0.828075	-0.35056	0.271355	0.266249	0.203615	-0.348676	-0.397812	-0.122324	-0.071446	0.0231318	-0.542715	-0.46958	-0.155994	0.0253933	0.0807969	0.219335	0.265467	0.173447	0.322353	-0.522104	-0.298845	-0.236128	0.150204	0.0476506	0.196198	0.451639	0.258021	0.288744	-0.00814761	0.203347	0.101731	0.236164	0.406297	0.404378	0.677537	0.737307	0.678574	0.667446	0.726453	0.720595	0.752518
PTPN14	-0.650974	-0.667361	-0.487675	-0.365798	-0.701713	-0.673349	-0.824827	-0.329648	0.29756	0.305358	0.259716	-0.294161	-0.332649	-0.0616489	-0.0303297	0.0735273	-0.584534	-0.498602	-0.202331	0.0029373	0.0531307	0.202862	0.207991	0.121057	0.256631	-0.51977	-0.283656	-0.216362	0.182683	0.0988451	0.135284	0.417576	0.216758	0.26045	-0.0283964	0.192635	0.0862294	0.228606	0.409467	0.418619	0.674304	0.745899	0.70414	0.633005	0.716449	0.720474	0.754703
ATP10D	-0.64395	-0.662639	-0.466045	-0.356066	-0.700701	-0.668818	-0.804399	-0.37082	0.221143	0.245065	0.18261	-0.353495	-0.389743	-0.116568	-0.0628127	0.0305814	-0.556253	-0.488501	-0.17529	-0.0173824	0.0371265	0.170295	0.224905	0.147282	0.301251	-0.474938	-0.248424	-0.198838	0.187895	0.0799799	0.206579	0.462602	0.271171	0.312181	0.0293895	0.212535	0.125329	0.255626	0.427242	0.425265	0.641959	0.714703	0.652944	0.654348	0.710505	0.72027	0.746955
PLP1	-0.660037	-0.664949	-0.469303	-0.360484	-0.684621	-0.646398	-0.785152	-0.378683	0.192345	0.243597	0.187697	-0.336688	-0.358954	-0.0891719	-0.040585	0.0554427	-0.582754	-0.514289	-0.207819	-0.0589526	-0.00709024	0.126216	0.171862	0.107263	0.260148	-0.437771	-0.203791	-0.162602	0.229393	0.124387	0.191595	0.45833	0.265794	0.319681	0.0507358	0.215651	0.137736	0.267891	0.444778	0.44695	0.613464	0.700738	0.643052	0.631406	0.694638	0.720224	0.743743
HTRA3	-0.665241	-0.659638	-0.435887	-0.348628	-0.666374	-0.615439	-0.730338	-0.45775	0.0311651	0.138791	0.060911	-0.420977	-0.424733	-0.154637	-0.0729742	0.00792786	-0.562396	-0.524323	-0.195712	-0.137478	-0.0809652	0.0241542	0.145268	0.110276	0.293653	-0.322103	-0.0966208	-0.0945913	0.282025	0.138729	0.298231	0.53131	0.353605	0.416442	0.172273	0.253167	0.217889	0.327251	0.493914	0.481359	0.528411	0.632958	0.545219	0.644263	0.668161	0.720218	0.727488
TACC1	-0.640452	-0.664388	-0.479015	-0.360362	-0.70901	-0.682701	-0.827534	-0.338506	0.287696	0.286996	0.232847	-0.320978	-0.365679	-0.0924525	-0.0515408	0.0476707	-0.562205	-0.48238	-0.177598	0.0171776	0.070013	0.214398	0.239509	0.149082	0.2909	-0.523862	-0.294588	-0.228724	0.163639	0.0708403	0.165035	0.433618	0.2364	0.272839	-0.0208261	0.197239	0.0923075	0.230888	0.406138	0.409732	0.677935	0.742646	0.692608	0.650761	0.722084	0.720061	0.753473
CDH13	-0.590995	-0.64807	-0.417543	-0.326936	-0.738561	-0.715789	-0.813801	-0.428299	0.149562	0.136003	0.0259158	-0.505949	-0.572596	-0.286974	-0.178506	-0.111186	-0.437817	-0.405805	-0.0442726	0.0474847	0.116604	0.21847	0.387731	0.295288	0.486314	-0.483081	-0.292987	-0.255724	0.0949633	-0.0651413	0.376882	0.5573	0.386152	0.39029	0.0845742	0.242009	0.167702	0.275767	0.417061	0.384021	0.651977	0.690915	0.581712	0.750967	0.738619	0.719974	0.740387
MS4A4A	-0.577435	-0.632556	-0.338296	-0.29372	-0.722871	-0.681756	-0.721926	-0.591313	-0.163178	-0.094137	-0.263101	-0.718793	-0.766071	-0.474557	-0.284762	-0.25508	-0.351464	-0.38795	0.0330429	-0.0621499	0.0213687	0.0604983	0.410959	0.363978	0.624251	-0.284155	-0.124531	-0.161079	0.147266	-0.102217	0.636477	0.725609	0.589103	0.593108	0.320921	0.320301	0.326137	0.38829	0.498705	0.426583	0.507439	0.562125	0.379998	0.814886	0.704352	0.71986	0.709149
CAV1	-0.640535	-0.663687	-0.477162	-0.359627	-0.707306	-0.680297	-0.823973	-0.342094	0.279392	0.281865	0.226863	-0.32433	-0.367855	-0.0948872	-0.0525677	0.0459168	-0.561363	-0.483	-0.177551	0.0126739	0.0656335	0.208599	0.23703	0.148311	0.291422	-0.517334	-0.288479	-0.224658	0.166798	0.0723428	0.169582	0.436609	0.240208	0.277294	-0.0147187	0.198901	0.0962222	0.233726	0.408474	0.411461	0.672892	0.738649	0.68733	0.650413	0.71999	0.719518	0.752085
ATP8B2	-0.616676	-0.649512	-0.413123	-0.330226	-0.707927	-0.67193	-0.768318	-0.461338	0.0613182	0.105314	-0.000427909	-0.502097	-0.542021	-0.261881	-0.152616	-0.0853684	-0.472901	-0.448017	-0.091348	-0.0381406	0.0280577	0.122425	0.297969	0.233788	0.431151	-0.393785	-0.194625	-0.180971	0.173338	0.00758748	0.382022	0.56976	0.401087	0.427582	0.150329	0.256691	0.208357	0.310477	0.457024	0.426475	0.584188	0.650251	0.539368	0.718079	0.706096	0.719117	0.730223
GYPC	-0.608903	-0.642294	-0.377476	-0.314949	-0.702532	-0.659034	-0.729344	-0.533004	-0.0748595	0.00305125	-0.129557	-0.598489	-0.63124	-0.348159	-0.202183	-0.151964	-0.431674	-0.437346	-0.0535617	-0.0826082	-0.00973578	0.0566907	0.313771	0.268476	0.49674	-0.309079	-0.124275	-0.142595	0.192287	-0.0135158	0.499041	0.645028	0.491903	0.517	0.253263	0.291175	0.277543	0.359237	0.491481	0.443115	0.522762	0.594318	0.450577	0.748817	0.692412	0.718988	0.716572
MEIS1	-0.643301	-0.662939	-0.473719	-0.358801	-0.701974	-0.672534	-0.814068	-0.351642	0.256891	0.270111	0.21392	-0.33022	-0.369318	-0.0971351	-0.0521861	0.0450404	-0.56324	-0.488087	-0.18168	-0.00290902	0.05005	0.189887	0.224862	0.141637	0.287713	-0.498081	-0.269055	-0.210937	0.179432	0.081444	0.178319	0.443338	0.248511	0.288737	0.00201499	0.203295	0.10688	0.242007	0.416409	0.418525	0.658281	0.728332	0.674527	0.647294	0.7138	0.718888	0.749137
GPM6B	-0.586265	-0.641003	-0.386253	-0.313845	-0.729293	-0.69876	-0.774427	-0.491668	0.0246128	0.0461	-0.0859643	-0.585917	-0.643415	-0.356427	-0.217103	-0.16427	-0.406194	-0.400801	-0.0175819	0.000347066	0.0746467	0.151935	0.390358	0.317158	0.534615	-0.400834	-0.222169	-0.21457	0.119521	-0.0747079	0.475475	0.621183	0.463725	0.469171	0.178567	0.272302	0.230289	0.320274	0.449843	0.402115	0.591464	0.637992	0.501085	0.771896	0.72215	0.718502	0.726437
C1QTNF1	-0.631444	-0.642371	-0.36774	-0.315564	-0.673049	-0.616095	-0.680825	-0.574754	-0.178081	-0.0413877	-0.174102	-0.60976	-0.616536	-0.338158	-0.185766	-0.138273	-0.457799	-0.474849	-0.0914565	-0.169136	-0.0979578	-0.0428639	0.23268	0.216614	0.455525	-0.212797	-0.0218326	-0.067076	0.268081	0.0508453	0.521902	0.668174	0.519802	0.565468	0.330362	0.310126	0.326047	0.399019	0.533895	0.485087	0.450053	0.547674	0.397295	0.722844	0.659886	0.718013	0.70484
ST8SIA4	-0.60672	-0.651898	-0.437377	-0.337538	-0.725915	-0.701782	-0.815535	-0.396895	0.195047	0.186852	0.0962971	-0.441141	-0.499659	-0.219157	-0.134113	-0.0560562	-0.479778	-0.431592	-0.0905707	0.0356004	0.098905	0.214934	0.334457	0.243412	0.41716	-0.494287	-0.291151	-0.244574	0.119481	-0.017221	0.303368	0.513604	0.334038	0.349586	0.0492957	0.226244	0.142069	0.260193	0.412812	0.392451	0.657986	0.706079	0.617414	0.714051	0.730401	0.718008	0.742668
GPR161	-0.700633	-0.656592	-0.406901	-0.34424	-0.613088	-0.536613	-0.633207	-0.552529	-0.191111	0.0286054	-0.0581895	-0.471513	-0.428243	-0.165599	-0.0609406	0.00957922	-0.593085	-0.584663	-0.248219	-0.300708	-0.244986	-0.168663	0.0108412	0.0323592	0.243972	-0.128314	0.102767	0.047992	0.418237	0.242297	0.375626	0.595192	0.430986	0.528656	0.338459	0.296774	0.32376	0.411278	0.577564	0.55841	0.382555	0.533599	0.423756	0.608914	0.606916	0.717617	0.701938
PCOLCE	-0.566247	-0.637373	-0.38175	-0.30811	-0.747521	-0.724582	-0.796285	-0.48182	0.0586092	0.0475106	-0.0922828	-0.605484	-0.679589	-0.38892	-0.243506	-0.193936	-0.373882	-0.369432	0.0214063	0.0498869	0.127268	0.204211	0.453253	0.364642	0.58319	-0.444472	-0.275002	-0.25747	0.0698382	-0.127719	0.493068	0.62567	0.469783	0.459835	0.153112	0.268313	0.215351	0.305331	0.428392	0.375721	0.624552	0.653674	0.511994	0.798365	0.740111	0.717603	0.729273
HIC1	-0.613553	-0.643287	-0.386045	-0.319066	-0.698354	-0.655149	-0.732346	-0.516753	-0.049371	0.0271265	-0.0971436	-0.570006	-0.600898	-0.319949	-0.184345	-0.129497	-0.447295	-0.445472	-0.0706444	-0.0822336	-0.0117693	0.0612363	0.29605	0.249598	0.469736	-0.319379	-0.129647	-0.142391	0.197772	0.00269441	0.466286	0.624643	0.467837	0.496447	0.233489	0.283117	0.263547	0.349922	0.486637	0.44367	0.529234	0.602975	0.468405	0.734185	0.69029	0.717539	0.717567
MSN	-0.594364	-0.648748	-0.430282	-0.33232	-0.735172	-0.714357	-0.822617	-0.40016	0.197048	0.174871	0.076694	-0.463889	-0.53077	-0.247944	-0.154969	-0.0808767	-0.456445	-0.412598	-0.0640722	0.0577294	0.123562	0.235887	0.371427	0.274154	0.45229	-0.507962	-0.311815	-0.263679	0.0940477	-0.0494407	0.327624	0.525281	0.348586	0.355359	0.04785	0.228222	0.142273	0.257815	0.40497	0.379642	0.668605	0.707643	0.612262	0.732403	0.738477	0.71724	0.742297
ENPP2	-0.612848	-0.653716	-0.448463	-0.342937	-0.721628	-0.697941	-0.820372	-0.376793	0.227611	0.217194	0.136886	-0.406167	-0.462641	-0.18449	-0.112268	-0.0283843	-0.499354	-0.44175	-0.111514	0.03678	0.0971721	0.221544	0.313447	0.220657	0.384412	-0.508251	-0.298878	-0.245138	0.125783	0.00233485	0.262888	0.488634	0.304308	0.324059	0.0242374	0.216318	0.124477	0.248575	0.40685	0.393161	0.667171	0.717808	0.640475	0.696775	0.728688	0.716868	0.744663
FMNL2	-0.597699	-0.647524	-0.423018	-0.330146	-0.728104	-0.703448	-0.806775	-0.418935	0.156162	0.150964	0.0489296	-0.479932	-0.540416	-0.258222	-0.158675	-0.087616	-0.455747	-0.41865	-0.0664116	0.0335145	0.0999383	0.205878	0.356904	0.268391	0.453108	-0.475812	-0.280524	-0.242541	0.112336	-0.0392216	0.34906	0.540709	0.367283	0.378084	0.0785039	0.237011	0.16216	0.272933	0.418527	0.390553	0.644604	0.689782	0.588337	0.731255	0.729589	0.716799	0.73769
FSCN1	-0.615458	-0.642196	-0.382633	-0.318058	-0.693353	-0.648061	-0.723212	-0.525022	-0.0693681	0.0164301	-0.108956	-0.57531	-0.602379	-0.322252	-0.184249	-0.13062	-0.448319	-0.449431	-0.0738403	-0.0957066	-0.025241	0.0448716	0.285652	0.24402	0.466749	-0.302259	-0.112602	-0.130397	0.208493	0.0102654	0.474214	0.630478	0.475214	0.506458	0.248248	0.286904	0.272899	0.357062	0.493299	0.449496	0.516082	0.593455	0.456634	0.731289	0.684509	0.71655	0.714519
C1QTNF3	-0.653251	-0.656853	-0.444226	-0.349197	-0.675395	-0.631832	-0.753489	-0.423355	0.100669	0.17659	0.104588	-0.394491	-0.410378	-0.140639	-0.0694413	0.0154578	-0.556229	-0.507624	-0.186327	-0.0920256	-0.0364983	0.078188	0.174702	0.124104	0.295778	-0.376664	-0.152305	-0.132812	0.245161	0.115457	0.263637	0.503416	0.321787	0.376006	0.118875	0.236878	0.18272	0.29905	0.46641	0.457658	0.567298	0.659323	0.581414	0.644793	0.680075	0.716074	0.730429
MUSK	-0.685135	-0.665182	-0.472201	-0.366241	-0.651593	-0.602112	-0.745606	-0.391117	0.138404	0.238856	0.194924	-0.30505	-0.301931	-0.0398239	-0.000597252	0.0995058	-0.626858	-0.55771	-0.265005	-0.133851	-0.0870195	0.0455734	0.075325	0.0347114	0.184951	-0.367645	-0.121666	-0.0960659	0.302997	0.203588	0.164228	0.448444	0.255143	0.331923	0.0896031	0.220235	0.159755	0.288761	0.474022	0.483545	0.5581	0.671099	0.620874	0.586554	0.661881	0.715931	0.733518
IGF1	-0.571637	-0.63119	-0.350428	-0.296975	-0.726864	-0.691485	-0.74143	-0.554437	-0.0935863	-0.0493326	-0.208213	-0.67954	-0.734674	-0.444857	-0.269977	-0.234135	-0.357497	-0.380964	0.0284633	-0.0277361	0.0534082	0.104213	0.421043	0.361542	0.607503	-0.332204	-0.170054	-0.189682	0.123305	-0.108674	0.588213	0.690815	0.54884	0.548761	0.267341	0.302594	0.290194	0.360778	0.474772	0.409181	0.541118	0.587884	0.419378	0.805382	0.711918	0.715815	0.712094
COL4A2	-0.588583	-0.640825	-0.394965	-0.317467	-0.725427	-0.696077	-0.779048	-0.471429	0.0571812	0.0735682	-0.049643	-0.554753	-0.611819	-0.327279	-0.199305	-0.141629	-0.419945	-0.406135	-0.032846	0.0060353	0.0778161	0.16244	0.37632	0.300273	0.508289	-0.416608	-0.233572	-0.218587	0.12031	-0.0617932	0.439402	0.597579	0.436327	0.444125	0.153114	0.262321	0.21245	0.30763	0.441407	0.399364	0.601489	0.648587	0.5218	0.756953	0.720605	0.715724	0.726824
PDGFRA	-0.572528	-0.635134	-0.372849	-0.305782	-0.73417	-0.705297	-0.771514	-0.505353	0.002823	0.018031	-0.124835	-0.620373	-0.683674	-0.395033	-0.242967	-0.19664	-0.377772	-0.381396	0.0118183	0.0117682	0.0891745	0.15823	0.423785	0.348685	0.574595	-0.396847	-0.227211	-0.223794	0.100502	-0.105893	0.515111	0.642354	0.490517	0.488141	0.194507	0.279131	0.241687	0.325663	0.447673	0.392738	0.588281	0.62781	0.479865	0.790706	0.724604	0.715676	0.721602
TGFB1I1	-0.62355	-0.657229	-0.466703	-0.351986	-0.714993	-0.691863	-0.828395	-0.34501	0.279442	0.266049	0.202268	-0.349993	-0.402926	-0.128392	-0.0768044	0.0165593	-0.531778	-0.458991	-0.14594	0.0377907	0.0934993	0.231372	0.278815	0.183433	0.331258	-0.530273	-0.310549	-0.245452	0.136917	0.0347052	0.197795	0.448864	0.256719	0.283515	-0.0154986	0.200631	0.0966116	0.2304	0.398001	0.395104	0.681843	0.736926	0.677808	0.669119	0.726196	0.715634	0.748414
H6PD	-0.596365	-0.637221	-0.37069	-0.309624	-0.707442	-0.666988	-0.732914	-0.532346	-0.0706088	-0.00514109	-0.143062	-0.613255	-0.652907	-0.369096	-0.217772	-0.170746	-0.411341	-0.420062	-0.0320787	-0.0632337	0.011322	0.0748902	0.342799	0.29222	0.52267	-0.320564	-0.14204	-0.158459	0.17017	-0.0397386	0.515106	0.65081	0.500415	0.51818	0.249312	0.291054	0.275426	0.355001	0.482435	0.43046	0.530467	0.594156	0.445998	0.760449	0.696527	0.715457	0.713606
FGF2	-0.602165	-0.637709	-0.369967	-0.310484	-0.700899	-0.657571	-0.723276	-0.539375	-0.0893484	-0.0113978	-0.14827	-0.612093	-0.645925	-0.363269	-0.211908	-0.164808	-0.41932	-0.429463	-0.0425897	-0.081825	-0.00792495	0.0541421	0.323108	0.278629	0.510376	-0.301439	-0.12082	-0.142272	0.187312	-0.0236931	0.5158	0.653334	0.503376	0.526056	0.263311	0.294177	0.284083	0.362465	0.491146	0.439789	0.515996	0.585625	0.437219	0.753255	0.689606	0.715424	0.711595
PRR16	-0.603029	-0.647187	-0.424395	-0.331611	-0.720137	-0.693206	-0.798328	-0.419067	0.148171	0.152989	0.0545996	-0.469293	-0.524227	-0.244125	-0.147944	-0.0754959	-0.466554	-0.428371	-0.0804293	0.018015	0.0830305	0.189593	0.334312	0.250689	0.433655	-0.462239	-0.26398	-0.228533	0.128213	-0.0206711	0.338856	0.535582	0.361657	0.37765	0.083927	0.236725	0.164776	0.275831	0.423625	0.397898	0.633459	0.684216	0.58559	0.719478	0.721945	0.715152	0.735114
FUT10	-0.633018	-0.651554	-0.43129	-0.340154	-0.690273	-0.651757	-0.763426	-0.43177	0.0981226	0.152855	0.0673503	-0.435513	-0.464642	-0.190968	-0.105346	-0.0275807	-0.516773	-0.47649	-0.141827	-0.0580935	0.00182232	0.109338	0.235287	0.175397	0.355525	-0.395267	-0.182802	-0.162144	0.204816	0.0623897	0.307957	0.525624	0.349278	0.389231	0.120941	0.241591	0.18603	0.297326	0.455255	0.437698	0.581976	0.659584	0.569382	0.675937	0.692688	0.714947	0.729371
C5AR1	-0.575855	-0.635154	-0.373895	-0.306788	-0.72974	-0.69955	-0.766932	-0.505333	-0.00138468	0.0195831	-0.121095	-0.613985	-0.674075	-0.386583	-0.236574	-0.189359	-0.384369	-0.38725	0.00346867	0.00283811	0.0794186	0.148958	0.41061	0.338288	0.563132	-0.389305	-0.217824	-0.215782	0.109777	-0.0949726	0.508873	0.639278	0.487048	0.487721	0.197386	0.278927	0.243052	0.32729	0.450678	0.397107	0.582139	0.624933	0.478711	0.783932	0.72039	0.714928	0.720359
LRRC7	-0.722817	-0.658305	-0.414558	-0.351352	-0.587281	-0.502573	-0.606755	-0.553166	-0.216464	0.038985	-0.0343392	-0.432561	-0.369471	-0.113313	-0.0213474	0.0549357	-0.635403	-0.62216	-0.300497	-0.356076	-0.305358	-0.225669	-0.0703894	-0.0318464	0.173465	-0.0827941	0.160292	0.0971622	0.476191	0.310272	0.337222	0.577087	0.40996	0.526646	0.356216	0.29596	0.33241	0.4219	0.597166	0.586495	0.346081	0.517541	0.418296	0.568392	0.582481	0.714687	0.69602
TMEM165	-0.577523	-0.627948	-0.33363	-0.291568	-0.711968	-0.668492	-0.707035	-0.595802	-0.183192	-0.103032	-0.271079	-0.71678	-0.758666	-0.470119	-0.28008	-0.25131	-0.353518	-0.392237	0.0259333	-0.0787443	0.00391802	0.040306	0.392627	0.351781	0.612542	-0.262786	-0.103277	-0.145053	0.160927	-0.0893655	0.63749	0.725605	0.591151	0.599055	0.334452	0.321986	0.333802	0.393625	0.503603	0.431731	0.489223	0.548567	0.366138	0.804367	0.692914	0.714496	0.701661
TPST1	-0.593202	-0.641328	-0.400018	-0.320236	-0.720265	-0.690164	-0.777422	-0.463161	0.0672341	0.0868396	-0.0306443	-0.535927	-0.589855	-0.307188	-0.185884	-0.125253	-0.432368	-0.414248	-0.047216	0.000123251	0.0701166	0.158406	0.358319	0.283586	0.486746	-0.416669	-0.229879	-0.213003	0.129426	-0.0461067	0.418514	0.585124	0.421739	0.433403	0.145047	0.258088	0.206277	0.30401	0.440994	0.402621	0.600562	0.650997	0.530043	0.744885	0.716633	0.714461	0.726463
GPR155	-0.605581	-0.632308	-0.341889	-0.300253	-0.684607	-0.630842	-0.676836	-0.603603	-0.22204	-0.0976221	-0.252302	-0.680305	-0.698742	-0.41632	-0.238034	-0.203436	-0.402087	-0.437213	-0.0328128	-0.146623	-0.0690393	-0.0302649	0.300281	0.280337	0.536782	-0.205484	-0.0320957	-0.0857983	0.230633	-0.0115076	0.60257	0.71227	0.574755	0.604861	0.363042	0.324585	0.34966	0.410803	0.530902	0.467545	0.444945	0.528784	0.355928	0.762415	0.666563	0.714242	0.697024
CYBRD1	-0.590185	-0.636446	-0.37523	-0.31007	-0.713654	-0.677218	-0.74652	-0.515048	-0.0338443	0.0142139	-0.121184	-0.60127	-0.647829	-0.363701	-0.21729	-0.168294	-0.407415	-0.410805	-0.0257715	-0.0381247	0.0361433	0.104663	0.360764	0.301538	0.526341	-0.350567	-0.172761	-0.179886	0.149574	-0.0537859	0.49878	0.637552	0.485028	0.4978	0.221335	0.282938	0.257212	0.340443	0.468133	0.417839	0.552305	0.608985	0.465472	0.762719	0.704192	0.714194	0.716108
MAB21L2	-0.6298	-0.65633	-0.463914	-0.352034	-0.704629	-0.677531	-0.812865	-0.355369	0.250608	0.254714	0.191831	-0.349991	-0.394871	-0.122385	-0.0699876	0.022875	-0.540338	-0.470328	-0.158773	0.0118347	0.0667089	0.201626	0.252311	0.165723	0.3157	-0.501616	-0.279897	-0.222415	0.159968	0.0555566	0.201077	0.453074	0.262285	0.295555	0.00566467	0.205197	0.109605	0.241038	0.409613	0.407126	0.659636	0.722663	0.662561	0.658837	0.715107	0.714086	0.743834
MN1	-0.711978	-0.663341	-0.456518	-0.365278	-0.612047	-0.544996	-0.679448	-0.448013	-0.00228561	0.175247	0.129656	-0.324609	-0.287808	-0.032137	0.017432	0.11279	-0.656401	-0.603821	-0.310643	-0.247016	-0.202057	-0.08596	-0.0277157	-0.0296738	0.135722	-0.238428	0.014015	0.00315656	0.400497	0.284258	0.20019	0.481609	0.295768	0.398625	0.194325	0.246082	0.225671	0.341985	0.529335	0.537195	0.46004	0.606487	0.545893	0.553831	0.617914	0.713057	0.716015
DNM3	-0.656699	-0.657159	-0.457185	-0.35464	-0.671007	-0.629336	-0.761595	-0.394147	0.148996	0.216651	0.157192	-0.350262	-0.366021	-0.0994486	-0.0444646	0.0474505	-0.575803	-0.514966	-0.207524	-0.0824308	-0.0304107	0.0950223	0.156345	0.101119	0.259307	-0.401194	-0.170534	-0.140019	0.245112	0.132767	0.212097	0.469825	0.282553	0.339792	0.0813404	0.222527	0.156599	0.280581	0.454027	0.453368	0.583378	0.675818	0.61237	0.624546	0.679049	0.712749	0.731818
UTRN	-0.694857	-0.662924	-0.467614	-0.366139	-0.633438	-0.577519	-0.719343	-0.406502	0.0926308	0.22161	0.179793	-0.302662	-0.286184	-0.0279269	0.0118545	0.11133	-0.641217	-0.576196	-0.28695	-0.176306	-0.131074	-0.00304694	0.0304351	0.00424329	0.157258	-0.320806	-0.0715172	-0.0580735	0.340873	0.238728	0.167118	0.453362	0.262279	0.349844	0.122881	0.226893	0.179923	0.30522	0.492159	0.502721	0.521348	0.64741	0.596274	0.567885	0.642665	0.712371	0.725124
FKBP10	-0.603871	-0.640417	-0.397825	-0.321323	-0.703958	-0.667919	-0.754906	-0.47541	0.0293009	0.0750267	-0.039318	-0.529877	-0.571258	-0.292051	-0.171751	-0.110841	-0.448869	-0.433294	-0.070351	-0.038988	0.0292432	0.114542	0.314546	0.252812	0.457515	-0.375802	-0.184853	-0.17825	0.16548	-0.0110882	0.416448	0.587227	0.425025	0.447237	0.172725	0.263311	0.222907	0.318142	0.457624	0.421039	0.568661	0.631589	0.511113	0.726422	0.69968	0.712061	0.720024
USHBP1	-0.740427	-0.665834	-0.458548	-0.37156	-0.579967	-0.500333	-0.638132	-0.468733	-0.0694614	0.162662	0.127078	-0.301118	-0.237236	0.0118128	0.0549069	0.1535	-0.701574	-0.650575	-0.368186	-0.329432	-0.288949	-0.175394	-0.126675	-0.102206	0.0636989	-0.159732	0.105059	0.0753498	0.480128	0.365898	0.182294	0.479617	0.293465	0.420396	0.243952	0.254732	0.255177	0.369115	0.564779	0.578831	0.399525	0.573738	0.517919	0.51221	0.585458	0.711653	0.707355
MS4A6D	-0.562014	-0.623221	-0.329807	-0.286815	-0.721544	-0.68342	-0.719499	-0.586005	-0.157945	-0.100365	-0.272603	-0.725912	-0.778859	-0.488981	-0.296061	-0.269366	-0.331059	-0.369865	0.0514677	-0.0446718	0.039654	0.0760362	0.433071	0.381808	0.641907	-0.292128	-0.1392	-0.173745	0.126778	-0.124272	0.645331	0.724872	0.591781	0.589357	0.314784	0.31764	0.321623	0.381481	0.486866	0.412187	0.510332	0.557716	0.37321	0.818643	0.70249	0.711178	0.70107
VAMP5	-0.588395	-0.63598	-0.386828	-0.313962	-0.714467	-0.681903	-0.760541	-0.483998	0.0225307	0.0537985	-0.0714376	-0.563418	-0.614308	-0.332203	-0.199982	-0.144978	-0.418058	-0.409731	-0.0360925	-0.0154951	0.0561891	0.135155	0.359743	0.291845	0.503817	-0.386358	-0.204789	-0.198473	0.136283	-0.0510456	0.453211	0.606087	0.448412	0.460025	0.177867	0.267919	0.227738	0.318483	0.450428	0.406715	0.577071	0.629518	0.498834	0.750234	0.708221	0.710931	0.718457
PARVB	-0.673402	-0.652581	-0.428641	-0.346789	-0.638976	-0.580532	-0.693665	-0.471048	-0.021284	0.120396	0.0469142	-0.410842	-0.3979	-0.134673	-0.0544709	0.0258276	-0.578623	-0.544718	-0.223937	-0.188576	-0.134775	-0.0349543	0.0865036	0.0692609	0.253561	-0.264057	-0.0352766	-0.0473174	0.327431	0.183389	0.294742	0.530638	0.356285	0.432469	0.208902	0.258393	0.239015	0.34381	0.512094	0.501727	0.480762	0.600966	0.514107	0.61478	0.639766	0.71078	0.712447
RBPMS	-0.626772	-0.656647	-0.482222	-0.358243	-0.708689	-0.688043	-0.837614	-0.30785	0.33992	0.315845	0.267773	-0.294338	-0.347215	-0.0769933	-0.0457112	0.0562696	-0.555186	-0.467198	-0.171852	0.0502851	0.101558	0.252687	0.256119	0.15491	0.285655	-0.560708	-0.333504	-0.254592	0.136127	0.0557554	0.133179	0.406225	0.207303	0.237676	-0.0627444	0.182338	0.0636114	0.206792	0.381706	0.388892	0.701373	0.756708	0.715728	0.643114	0.724083	0.710454	0.749129
TGM2	-0.567163	-0.630348	-0.370171	-0.303331	-0.730033	-0.701919	-0.767638	-0.500407	0.00618355	0.0189093	-0.123166	-0.616233	-0.680192	-0.393443	-0.242428	-0.196492	-0.373345	-0.376727	0.013865	0.0152244	0.0922029	0.160985	0.424549	0.348847	0.572906	-0.397489	-0.229541	-0.225232	0.0964491	-0.108295	0.511426	0.637288	0.486516	0.483193	0.190552	0.276537	0.238359	0.321907	0.442745	0.388057	0.586652	0.62474	0.477864	0.786356	0.720595	0.710413	0.716655
BNIP2	-0.689148	-0.64423	-0.375059	-0.329172	-0.600239	-0.517885	-0.593434	-0.60378	-0.299456	-0.0519862	-0.158049	-0.539806	-0.48957	-0.227864	-0.0962381	-0.0394679	-0.557893	-0.573401	-0.220182	-0.337704	-0.277691	-0.224049	0.016242	0.0540069	0.287425	-0.0557934	0.162544	0.0822243	0.433982	0.228926	0.461333	0.64724	0.496822	0.59402	0.418229	0.321019	0.376099	0.446666	0.600656	0.568288	0.326676	0.482289	0.348409	0.623523	0.587669	0.709852	0.683339
GM11710	-0.6359	-0.639508	-0.381628	-0.321227	-0.659733	-0.603703	-0.68133	-0.539037	-0.127661	0.00556694	-0.109922	-0.549803	-0.552774	-0.280652	-0.149558	-0.0934209	-0.484934	-0.487321	-0.124235	-0.167596	-0.101648	-0.0342146	0.19601	0.177966	0.399325	-0.230757	-0.0315934	-0.0657823	0.277155	0.0823668	0.454346	0.623614	0.469206	0.521478	0.289796	0.292219	0.296613	0.378109	0.520698	0.482765	0.458913	0.560196	0.428761	0.688819	0.650655	0.709824	0.701451
ARL1	-0.676596	-0.642617	-0.374593	-0.326509	-0.613154	-0.536349	-0.611	-0.592763	-0.267806	-0.0443147	-0.153849	-0.546865	-0.508223	-0.2441	-0.110739	-0.0550045	-0.539227	-0.553358	-0.196626	-0.301697	-0.240025	-0.18474	0.0574237	0.0836175	0.315854	-0.0907073	0.122523	0.050939	0.399616	0.19486	0.465663	0.64563	0.495159	0.582168	0.394571	0.316238	0.361707	0.433656	0.584306	0.549779	0.353117	0.496768	0.361783	0.639596	0.600945	0.70964	0.686512
PLEKHO1	-0.603687	-0.644131	-0.429232	-0.333216	-0.711789	-0.685134	-0.7956	-0.402715	0.16853	0.172704	0.0822239	-0.441582	-0.494277	-0.217795	-0.131226	-0.055186	-0.477702	-0.433297	-0.0953274	0.0173141	0.0798048	0.19137	0.315877	0.232059	0.4069	-0.467443	-0.266001	-0.226164	0.133051	-0.00564324	0.308313	0.514699	0.338651	0.357846	0.0668943	0.228423	0.152015	0.26641	0.417257	0.396417	0.634518	0.68716	0.597106	0.702002	0.715356	0.70953	0.7314
FBLN7	-0.661766	-0.644838	-0.397194	-0.33229	-0.637313	-0.574237	-0.664513	-0.528439	-0.128421	0.0347444	-0.0627672	-0.495156	-0.479659	-0.21358	-0.10144	-0.0362159	-0.536516	-0.528482	-0.18384	-0.21533	-0.15537	-0.0791987	0.112673	0.1081	0.31828	-0.201681	0.0128251	-0.0239567	0.332554	0.154435	0.396115	0.593936	0.433201	0.50491	0.289658	0.286118	0.293604	0.381115	0.535812	0.509491	0.435413	0.556442	0.441159	0.645166	0.631095	0.709466	0.700564
FAM65A	-0.70529	-0.655027	-0.428391	-0.352866	-0.60229	-0.528984	-0.644002	-0.500027	-0.107721	0.098515	0.0343809	-0.391438	-0.347202	-0.0912153	-0.0156147	0.067108	-0.62699	-0.597148	-0.286527	-0.28553	-0.236304	-0.141428	-0.0246873	-0.0105144	0.176708	-0.168437	0.0733521	0.0375189	0.419355	0.274579	0.283201	0.534104	0.360516	0.463953	0.272976	0.270845	0.277732	0.378332	0.555033	0.550369	0.407573	0.559748	0.475845	0.569944	0.602036	0.70934	0.701762
PTRF	-0.604663	-0.648375	-0.455308	-0.343413	-0.719549	-0.70041	-0.829952	-0.345044	0.280887	0.251562	0.180059	-0.371549	-0.433497	-0.158648	-0.0989998	-0.0106595	-0.501712	-0.434049	-0.11546	0.0627696	0.12078	0.253677	0.317781	0.215995	0.367182	-0.542172	-0.331929	-0.265268	0.107081	-0.00145598	0.222063	0.457432	0.269913	0.286669	-0.018125	0.200818	0.0952837	0.225303	0.385561	0.377318	0.688815	0.733236	0.66744	0.683846	0.729428	0.708892	0.741997
LAIR1	-0.572543	-0.624735	-0.341935	-0.293386	-0.710623	-0.671034	-0.717208	-0.566212	-0.132401	-0.0686301	-0.227669	-0.682372	-0.728646	-0.44285	-0.265443	-0.231816	-0.359491	-0.388063	0.018991	-0.0564886	0.0237736	0.0689375	0.393343	0.34445	0.593187	-0.29458	-0.132988	-0.162568	0.146318	-0.0893705	0.596705	0.695854	0.557633	0.563719	0.294519	0.307572	0.306396	0.372404	0.485231	0.419041	0.510085	0.564661	0.393736	0.79167	0.694387	0.708665	0.700883
PARD6G	-0.652814	-0.652427	-0.450054	-0.350829	-0.665204	-0.622395	-0.750707	-0.401537	0.128628	0.202065	0.139935	-0.359465	-0.373274	-0.108153	-0.0491103	0.040231	-0.568783	-0.512205	-0.203565	-0.090431	-0.0380395	0.0830453	0.153915	0.102323	0.263471	-0.385387	-0.15747	-0.13182	0.248838	0.132199	0.224912	0.476418	0.292204	0.349774	0.0955412	0.225841	0.165402	0.285995	0.456902	0.454226	0.570053	0.66361	0.596578	0.623225	0.672143	0.708439	0.72544
SEMA3A	-0.616202	-0.649589	-0.457308	-0.346414	-0.706974	-0.683094	-0.814844	-0.350831	0.258823	0.250023	0.183405	-0.358945	-0.410383	-0.138271	-0.0824394	0.00775948	-0.521027	-0.452959	-0.139582	0.0315548	0.0875599	0.22039	0.277948	0.186017	0.336354	-0.513783	-0.298157	-0.237899	0.13805	0.0316711	0.210987	0.454076	0.265913	0.292274	-0.00191026	0.203077	0.10465	0.234415	0.398453	0.393273	0.666851	0.722108	0.659323	0.66626	0.716984	0.708318	0.738998
TLR7	-0.614302	-0.636888	-0.38716	-0.318992	-0.682072	-0.637327	-0.71842	-0.504516	-0.0450972	0.0392747	-0.0767095	-0.541902	-0.566531	-0.2913	-0.16473	-0.107123	-0.459606	-0.453512	-0.0903853	-0.0955791	-0.0281876	0.0475369	0.264376	0.222415	0.43514	-0.308093	-0.115376	-0.127895	0.212862	0.0269366	0.437764	0.604635	0.447343	0.482006	0.227477	0.276452	0.257163	0.344974	0.484299	0.446213	0.516391	0.595504	0.468925	0.709432	0.675289	0.708105	0.708344
LGALS1	-0.56588	-0.634571	-0.404474	-0.316135	-0.740425	-0.72312	-0.814297	-0.420439	0.161091	0.125958	0.00934994	-0.521412	-0.599011	-0.314786	-0.200152	-0.137859	-0.402803	-0.374695	-0.0106239	0.0804868	0.151457	0.249016	0.43088	0.329826	0.521422	-0.501265	-0.322388	-0.280968	0.0573864	-0.106275	0.394671	0.558641	0.392725	0.384974	0.0729621	0.238237	0.15982	0.264398	0.397284	0.359435	0.661557	0.687141	0.573122	0.762079	0.739549	0.708053	0.729796
CXX1C	-0.664523	-0.654364	-0.455617	-0.355245	-0.653982	-0.607475	-0.74054	-0.399697	0.121791	0.211081	0.156287	-0.337792	-0.342446	-0.0801771	-0.02847	0.0643674	-0.591218	-0.531132	-0.230138	-0.115266	-0.0654378	0.0584492	0.114837	0.070583	0.22779	-0.367364	-0.132896	-0.110001	0.276062	0.165534	0.202556	0.465614	0.279189	0.345944	0.100291	0.224465	0.167161	0.289612	0.465553	0.467578	0.555713	0.658912	0.598064	0.603594	0.661892	0.707974	0.724078
EXOC3L2	-0.626983	-0.627928	-0.329668	-0.299305	-0.646128	-0.577758	-0.618101	-0.643696	-0.332362	-0.143356	-0.295919	-0.684153	-0.673185	-0.398356	-0.215581	-0.183664	-0.430436	-0.477021	-0.0771937	-0.242189	-0.167384	-0.140677	0.205126	0.217833	0.483226	-0.0977806	0.0818855	-0.000765936	0.314375	0.0626514	0.619365	0.730236	0.598539	0.651878	0.443912	0.342325	0.399447	0.451024	0.573788	0.511117	0.36133	0.473975	0.296181	0.725899	0.625089	0.707765	0.678978
PLXDC1	-0.584298	-0.627178	-0.352518	-0.299708	-0.700343	-0.6585	-0.713228	-0.552671	-0.117163	-0.0439188	-0.191682	-0.646189	-0.684958	-0.402545	-0.237988	-0.198409	-0.386794	-0.407211	-0.0119699	-0.0727359	0.00399494	0.0561756	0.353802	0.308855	0.548793	-0.290807	-0.120925	-0.148008	0.168774	-0.0546386	0.556687	0.673214	0.530571	0.545501	0.282446	0.300565	0.296846	0.367776	0.487502	0.428603	0.50591	0.56863	0.408856	0.767705	0.686345	0.70766	0.701181
MS4A6C	-0.575695	-0.627183	-0.358669	-0.300373	-0.711581	-0.675536	-0.734332	-0.530713	-0.0669557	-0.0190381	-0.164627	-0.634085	-0.683403	-0.399619	-0.240427	-0.19855	-0.379472	-0.393184	-0.00014267	-0.0358929	0.0409309	0.099545	0.383682	0.326056	0.559367	-0.334144	-0.165704	-0.179961	0.137916	-0.0778943	0.538628	0.658081	0.51255	0.519621	0.244696	0.290412	0.272669	0.348445	0.468129	0.410784	0.538215	0.590396	0.435781	0.774823	0.699392	0.707476	0.706174
PLEKHO2	-0.6166	-0.645881	-0.440134	-0.339803	-0.698299	-0.668757	-0.788466	-0.388182	0.182242	0.198783	0.121067	-0.400717	-0.444147	-0.17202	-0.0997816	-0.0172749	-0.508331	-0.455202	-0.130993	-0.00350396	0.0548848	0.173798	0.268675	0.190281	0.355317	-0.459613	-0.249009	-0.207245	0.16027	0.0351949	0.263706	0.489246	0.308657	0.338346	0.0555821	0.220793	0.14254	0.26201	0.420431	0.407775	0.626686	0.689151	0.611525	0.673304	0.704275	0.707285	0.730259
PRKG1	-0.637574	-0.653277	-0.471492	-0.355972	-0.686689	-0.657177	-0.800767	-0.337651	0.264215	0.279455	0.229655	-0.306823	-0.342685	-0.0764053	-0.0386785	0.0599524	-0.566217	-0.487884	-0.192201	-0.00727059	0.0431779	0.184584	0.205263	0.124141	0.263134	-0.491964	-0.262911	-0.203454	0.184347	0.0943718	0.155083	0.424182	0.230206	0.273238	-0.00696189	0.195813	0.0985565	0.23421	0.408998	0.414632	0.648403	0.720212	0.67296	0.626127	0.699528	0.70668	0.737498
TACR2	-0.672635	-0.663338	-0.507063	-0.376573	-0.662474	-0.627954	-0.799002	-0.291618	0.32688	0.362397	0.346761	-0.19617	-0.213135	0.0446026	0.0423944	0.159954	-0.647831	-0.542665	-0.281723	-0.0440718	-0.00392924	0.161089	0.0975559	0.0238302	0.135008	-0.496611	-0.242282	-0.171022	0.242353	0.191096	0.0304335	0.353514	0.144585	0.21171	-0.0551068	0.17247	0.0627253	0.215204	0.411324	0.439258	0.648985	0.74206	0.729567	0.559458	0.682627	0.706604	0.7431
STARD8	-0.661842	-0.638137	-0.372634	-0.322606	-0.622238	-0.550979	-0.624624	-0.579284	-0.23634	-0.0363141	-0.148359	-0.550155	-0.522468	-0.257377	-0.123291	-0.0686615	-0.519696	-0.532278	-0.174166	-0.266666	-0.203795	-0.147062	0.0951345	0.110374	0.340209	-0.123147	0.0844499	0.021501	0.365813	0.162575	0.466671	0.640578	0.490664	0.567848	0.370125	0.310086	0.346215	0.419242	0.566188	0.529949	0.376323	0.508193	0.373046	0.65123	0.610477	0.706091	0.686295
FAM13C	-0.640564	-0.653522	-0.473656	-0.357349	-0.683199	-0.652885	-0.798399	-0.334935	0.265822	0.284537	0.237546	-0.29794	-0.331424	-0.0662176	-0.031559	0.0684339	-0.573155	-0.493073	-0.200477	-0.0129622	0.0365536	0.179394	0.193809	0.114275	0.251226	-0.488887	-0.257793	-0.198277	0.191265	0.104148	0.145563	0.418809	0.223941	0.269533	-0.00843794	0.194344	0.0970885	0.233712	0.410159	0.417581	0.6456	0.719887	0.675285	0.61936	0.696524	0.706023	0.736937
MTSS1L	-0.633654	-0.648805	-0.452599	-0.34785	-0.682024	-0.648292	-0.778376	-0.374774	0.191643	0.226046	0.162791	-0.355324	-0.386594	-0.119349	-0.0629711	0.0268677	-0.54569	-0.483239	-0.174312	-0.0327537	0.0209259	0.147685	0.210021	0.139559	0.294302	-0.445242	-0.223484	-0.181161	0.196376	0.0859566	0.214575	0.462333	0.276601	0.319617	0.0476113	0.213591	0.134985	0.259872	0.427335	0.423982	0.614041	0.689461	0.625501	0.639844	0.690568	0.705667	0.729255
C1S1	-0.58035	-0.631768	-0.390563	-0.31343	-0.715013	-0.686353	-0.769106	-0.461889	0.0613836	0.0763395	-0.0440459	-0.542993	-0.599455	-0.319181	-0.194469	-0.136984	-0.415459	-0.400698	-0.0338885	0.00749335	0.0779692	0.162412	0.37008	0.294471	0.49829	-0.413612	-0.23268	-0.216735	0.117971	-0.0599632	0.428552	0.586028	0.426537	0.434314	0.147076	0.257211	0.206789	0.301351	0.433734	0.392986	0.594951	0.641199	0.517509	0.744699	0.710573	0.705301	0.716739
P2RY13	-0.561853	-0.622191	-0.349232	-0.293836	-0.718529	-0.685463	-0.73758	-0.535795	-0.0710271	-0.0352944	-0.18915	-0.658984	-0.715987	-0.430532	-0.26236	-0.225221	-0.353929	-0.373216	0.027358	-0.0162906	0.0631004	0.116692	0.419395	0.356713	0.595104	-0.342749	-0.182191	-0.196347	0.113679	-0.110005	0.566175	0.671187	0.529527	0.527977	0.247344	0.293163	0.275317	0.347459	0.460871	0.39803	0.544384	0.587871	0.425622	0.792101	0.704846	0.70492	0.703394
ADAMTS2	-0.617819	-0.645657	-0.447702	-0.342794	-0.695839	-0.667691	-0.793695	-0.369883	0.212661	0.223179	0.152922	-0.374123	-0.41795	-0.147772	-0.0852804	0.0013719	-0.519075	-0.458534	-0.142705	0.00382959	0.0601426	0.185548	0.259222	0.177582	0.334344	-0.475668	-0.261591	-0.212825	0.158684	0.0441614	0.232655	0.468652	0.284752	0.31581	0.0318923	0.211814	0.126088	0.250172	0.412038	0.40418	0.637192	0.699362	0.630455	0.661423	0.703855	0.704899	0.73085
RORA	-0.601822	-0.642244	-0.438403	-0.336062	-0.709414	-0.685686	-0.804184	-0.375436	0.214615	0.20637	0.125415	-0.406419	-0.461644	-0.187887	-0.114208	-0.0329661	-0.487715	-0.43324	-0.106514	0.0336278	0.0935191	0.213839	0.310086	0.219992	0.383204	-0.494314	-0.289562	-0.238855	0.124419	0.000166689	0.266963	0.485836	0.305704	0.324841	0.0307856	0.215089	0.127097	0.247682	0.402225	0.387449	0.652094	0.702062	0.623646	0.687625	0.715769	0.704874	0.731296
PRRT2	-0.698707	-0.658362	-0.469647	-0.367158	-0.617357	-0.559076	-0.705004	-0.397238	0.0923555	0.232485	0.198953	-0.275545	-0.251432	0.00154934	0.0325786	0.135015	-0.656818	-0.58781	-0.309619	-0.194461	-0.152297	-0.0216733	-0.00546685	-0.0257937	0.120645	-0.305728	-0.0523915	-0.0399537	0.360771	0.267078	0.139731	0.435464	0.243557	0.338496	0.120782	0.221684	0.176261	0.302968	0.493225	0.508752	0.506387	0.639504	0.596016	0.54318	0.627767	0.704821	0.717317
MSRB3	-0.586498	-0.640778	-0.441757	-0.334304	-0.726221	-0.710436	-0.830755	-0.352985	0.270573	0.227868	0.145622	-0.404133	-0.474936	-0.198542	-0.126918	-0.0450612	-0.468508	-0.408773	-0.0808243	0.0846201	0.145833	0.271425	0.36061	0.253629	0.411707	-0.548383	-0.348558	-0.283052	0.0784019	-0.0407978	0.258873	0.474914	0.292988	0.299298	-0.0112467	0.204935	0.100728	0.225385	0.377265	0.361801	0.692623	0.726698	0.650694	0.704293	0.733989	0.704351	0.736635
TRIM47	-0.636079	-0.62457	-0.322039	-0.29786	-0.626308	-0.550731	-0.587404	-0.664464	-0.389753	-0.168672	-0.320867	-0.688152	-0.662738	-0.39192	-0.206035	-0.176035	-0.442086	-0.495161	-0.0972746	-0.289517	-0.215952	-0.196059	0.159301	0.188414	0.458746	-0.0426942	0.139243	0.0416503	0.355016	0.0977175	0.63042	0.740283	0.612131	0.676576	0.485768	0.351515	0.425209	0.471394	0.594772	0.531937	0.318256	0.444839	0.26384	0.70811	0.603576	0.703503	0.668714
CEP85L	-0.660903	-0.649861	-0.451779	-0.352719	-0.648238	-0.601403	-0.733085	-0.39943	0.115299	0.206805	0.152129	-0.336875	-0.340323	-0.0800073	-0.0280367	0.0638965	-0.587938	-0.529029	-0.229842	-0.118586	-0.0691066	0.0531973	0.110747	0.0682145	0.225095	-0.359979	-0.126973	-0.105678	0.277597	0.16696	0.203242	0.464141	0.279328	0.346493	0.103853	0.22407	0.168738	0.289796	0.464523	0.46635	0.548272	0.651933	0.59091	0.598677	0.655887	0.703128	0.718538
ENPP1	-0.683403	-0.648842	-0.433764	-0.35017	-0.616532	-0.553783	-0.673739	-0.460094	-0.0243663	0.136826	0.0758445	-0.371073	-0.345553	-0.089292	-0.0221268	0.0631198	-0.606493	-0.566496	-0.261264	-0.219903	-0.170637	-0.0665462	0.0291329	0.0216405	0.196926	-0.239598	-0.0031979	-0.0175283	0.361916	0.229993	0.254242	0.506109	0.329698	0.418243	0.208613	0.252089	0.235745	0.343055	0.517428	0.514715	0.458181	0.590612	0.515034	0.57889	0.619089	0.702669	0.70368
PEA15A	-0.649801	-0.648756	-0.456831	-0.352406	-0.660207	-0.619822	-0.754946	-0.376555	0.167496	0.231018	0.177791	-0.326522	-0.341867	-0.0801651	-0.0329166	0.060843	-0.576998	-0.511693	-0.214278	-0.0776897	-0.0278823	0.100534	0.145846	0.0894944	0.239819	-0.406097	-0.175654	-0.140895	0.242351	0.138956	0.187036	0.449233	0.261965	0.319895	0.064394	0.2135	0.143477	0.269129	0.442986	0.445857	0.582375	0.673946	0.617579	0.607466	0.66959	0.702037	0.722847
CD4	-0.601347	-0.632013	-0.392025	-0.317897	-0.687541	-0.649217	-0.73514	-0.474771	0.0119733	0.0691547	-0.042132	-0.519847	-0.554879	-0.280804	-0.162696	-0.102319	-0.451211	-0.436844	-0.080519	-0.0565467	0.00996612	0.0929601	0.290026	0.235039	0.43772	-0.352462	-0.161873	-0.159974	0.180173	0.0055647	0.409583	0.580417	0.42071	0.447589	0.182917	0.262256	0.227495	0.320487	0.459476	0.42429	0.546966	0.61492	0.496369	0.708504	0.683062	0.702021	0.708073
TNFRSF17	-0.600271	-0.626474	-0.363955	-0.306821	-0.67691	-0.630283	-0.696113	-0.53531	-0.108706	-0.0143646	-0.145027	-0.59165	-0.615874	-0.340837	-0.194881	-0.147429	-0.426817	-0.436992	-0.0613506	-0.10732	-0.0363865	0.0239282	0.283788	0.248785	0.475983	-0.270289	-0.0888457	-0.115861	0.210124	0.00420273	0.49885	0.639487	0.492126	0.522419	0.273834	0.291122	0.287832	0.364133	0.49328	0.445143	0.486596	0.564108	0.420446	0.724728	0.665789	0.70134	0.695297
EVC	-0.607917	-0.629885	-0.378971	-0.314105	-0.674236	-0.628748	-0.705833	-0.509063	-0.0630477	0.025776	-0.0922958	-0.548405	-0.571401	-0.298572	-0.168711	-0.113748	-0.450798	-0.448643	-0.0857935	-0.101758	-0.0342556	0.0371705	0.262026	0.223329	0.437909	-0.293018	-0.103745	-0.120516	0.214643	0.0254964	0.447972	0.608259	0.454438	0.489028	0.23916	0.278292	0.263941	0.348288	0.484617	0.444765	0.502573	0.582119	0.452704	0.705714	0.666466	0.701238	0.699638
RAB34	-0.563408	-0.624403	-0.376009	-0.304201	-0.720648	-0.694538	-0.76728	-0.473636	0.0433173	0.0483657	-0.0834408	-0.578582	-0.642576	-0.360736	-0.222857	-0.172325	-0.382795	-0.377157	-0.000175518	0.0243727	0.0981658	0.17421	0.409757	0.330672	0.542689	-0.413755	-0.243167	-0.230319	0.0932769	-0.0968494	0.469288	0.606616	0.453185	0.451437	0.159891	0.263129	0.216137	0.304538	0.428427	0.380014	0.594407	0.631661	0.496648	0.765095	0.71377	0.701147	0.710976
ROBO1	-0.56083	-0.624401	-0.378135	-0.304504	-0.723997	-0.6997	-0.77389	-0.466344	0.0596218	0.0567521	-0.0741475	-0.574022	-0.641246	-0.359049	-0.223126	-0.171756	-0.380919	-0.372993	0.00304502	0.0358448	0.109599	0.187818	0.418557	0.335501	0.545227	-0.427496	-0.257232	-0.240244	0.0838189	-0.103645	0.462766	0.60133	0.446909	0.44281	0.147606	0.25974	0.208228	0.298258	0.422248	0.374466	0.604604	0.638636	0.505481	0.766879	0.717738	0.701017	0.712522
FLI1	-0.55308	-0.626844	-0.397084	-0.310279	-0.739388	-0.724479	-0.811974	-0.416925	0.163903	0.119634	-2.08e-05	-0.528519	-0.610758	-0.32781	-0.21014	-0.150512	-0.385452	-0.359616	0.00511021	0.0945071	0.166237	0.26121	0.4495	0.345089	0.536928	-0.507001	-0.33382	-0.291096	0.0405981	-0.124853	0.403435	0.558989	0.396058	0.382951	0.069058	0.236464	0.156892	0.259347	0.387914	0.347731	0.663368	0.682955	0.566565	0.765683	0.737973	0.700962	0.723054
ARHGEF25	-0.602783	-0.641922	-0.453097	-0.34162	-0.706776	-0.686458	-0.816987	-0.339002	0.277388	0.254358	0.187224	-0.356491	-0.414059	-0.143587	-0.088357	0.000748991	-0.506095	-0.437173	-0.125905	0.0525551	0.108712	0.241782	0.297606	0.199679	0.346924	-0.530077	-0.319237	-0.253885	0.11683	0.0128229	0.208041	0.446312	0.259721	0.280133	-0.0178692	0.19731	0.0936342	0.223326	0.384117	0.378258	0.676144	0.723967	0.662109	0.667306	0.717101	0.700617	0.733224
FILIP1	-0.618677	-0.643478	-0.452803	-0.34462	-0.6893	-0.661606	-0.792786	-0.354397	0.233484	0.242428	0.179434	-0.348624	-0.390856	-0.123681	-0.0701444	0.0199711	-0.529496	-0.462936	-0.156024	0.00463705	0.0586951	0.189056	0.243757	0.161362	0.310572	-0.482592	-0.26545	-0.212113	0.162057	0.0570564	0.204194	0.44938	0.263245	0.296958	0.0148398	0.204014	0.113572	0.241024	0.40584	0.402512	0.640042	0.703584	0.642665	0.646329	0.699008	0.700419	0.728345
CLEC4A3	-0.566401	-0.621447	-0.360284	-0.298679	-0.710249	-0.67779	-0.73957	-0.510545	-0.0338826	-0.000618342	-0.14206	-0.616049	-0.670353	-0.3889	-0.236125	-0.192504	-0.374812	-0.383288	0.0031359	-0.0152136	0.0604801	0.123324	0.393145	0.328869	0.554794	-0.356776	-0.189789	-0.1958	0.120673	-0.0868879	0.517411	0.639683	0.493242	0.496587	0.217878	0.280558	0.254145	0.332756	0.452131	0.397204	0.552125	0.598429	0.449846	0.76865	0.699559	0.700415	0.702436
MARVELD1	-0.611947	-0.644633	-0.465326	-0.348092	-0.700523	-0.679702	-0.819723	-0.319782	0.306773	0.285514	0.229835	-0.318326	-0.371754	-0.103993	-0.0626647	0.0328898	-0.530554	-0.451795	-0.152372	0.0476115	0.100425	0.242192	0.268341	0.170487	0.307415	-0.539297	-0.320772	-0.249261	0.129583	0.0395472	0.164373	0.420365	0.228572	0.255238	-0.0404498	0.187727	0.0774789	0.213389	0.380902	0.382514	0.68186	0.7345	0.684844	0.646653	0.713533	0.699983	0.735364
HDAC7	-0.55486	-0.622156	-0.373655	-0.301525	-0.72679	-0.703646	-0.774669	-0.469412	0.0560655	0.0485301	-0.0861984	-0.58575	-0.656103	-0.373187	-0.233001	-0.183859	-0.36959	-0.364423	0.01512	0.0434846	0.118402	0.194126	0.433756	0.348835	0.561098	-0.429937	-0.263195	-0.246598	0.0738762	-0.117425	0.475895	0.607811	0.455241	0.447497	0.150098	0.261343	0.21026	0.298479	0.419628	0.369298	0.606321	0.636769	0.49997	0.774501	0.71979	0.699886	0.711113
MCAM	-0.607172	-0.642971	-0.462362	-0.34595	-0.703051	-0.68335	-0.821273	-0.3209	0.306652	0.280778	0.222442	-0.326187	-0.382392	-0.114059	-0.0699177	0.0241348	-0.521975	-0.444884	-0.143054	0.0549411	0.108597	0.248869	0.280778	0.180959	0.319387	-0.543159	-0.327263	-0.255408	0.120872	0.0284425	0.172963	0.424279	0.233694	0.257338	-0.0405019	0.188375	0.0777539	0.212585	0.378034	0.37788	0.684647	0.734176	0.682144	0.652472	0.715615	0.699114	0.734547
CNRIP1	-0.5891	-0.633653	-0.421583	-0.326664	-0.706593	-0.682489	-0.790143	-0.394162	0.175507	0.170353	0.07892	-0.44095	-0.49762	-0.22412	-0.136988	-0.0630342	-0.461358	-0.417942	-0.0826696	0.0311652	0.0936404	0.203413	0.329326	0.242357	0.415023	-0.472928	-0.277101	-0.235071	0.116903	-0.0208075	0.309111	0.508626	0.335638	0.350136	0.0588481	0.224016	0.145664	0.258338	0.405081	0.383088	0.634587	0.681481	0.591301	0.699392	0.710012	0.698895	0.721485
ANXA5	-0.561182	-0.62278	-0.378275	-0.304463	-0.719661	-0.694857	-0.769935	-0.463726	0.059636	0.0592718	-0.0695935	-0.567218	-0.632649	-0.351922	-0.218153	-0.166142	-0.384147	-0.375292	-0.00215027	0.0317255	0.104705	0.183469	0.409981	0.328318	0.53632	-0.423745	-0.252708	-0.235934	0.0882464	-0.0970784	0.455986	0.596618	0.44214	0.439723	0.146889	0.258276	0.207131	0.297416	0.422057	0.375467	0.60069	0.636289	0.505031	0.760505	0.713684	0.698637	0.710086
PLS3	-0.734535	-0.661132	-0.488049	-0.380868	-0.575442	-0.505487	-0.668511	-0.383211	0.0782158	0.268991	0.262592	-0.192992	-0.138367	0.103017	0.106223	0.221112	-0.731857	-0.649165	-0.400801	-0.274586	-0.241911	-0.100603	-0.139677	-0.136225	-0.00639525	-0.248384	0.0266213	0.0318825	0.449765	0.380379	0.0542715	0.390394	0.191109	0.316806	0.128787	0.213059	0.176134	0.309795	0.516965	0.54968	0.458596	0.623285	0.603504	0.470521	0.589684	0.698592	0.708918
MFAP2	-0.58303	-0.629425	-0.404543	-0.318848	-0.705302	-0.678566	-0.773874	-0.42539	0.116833	0.123856	0.0195272	-0.486302	-0.541311	-0.266361	-0.162018	-0.0961974	-0.438978	-0.409583	-0.0615382	0.015856	0.0816136	0.178551	0.342463	0.262625	0.449286	-0.438335	-0.250128	-0.221681	0.120462	-0.0356563	0.363763	0.542813	0.377209	0.389525	0.103045	0.239085	0.175489	0.278774	0.418232	0.38767	0.609374	0.656989	0.551484	0.715351	0.704924	0.698101	0.714896
TIMP2	-0.604132	-0.640512	-0.454582	-0.34228	-0.701559	-0.680664	-0.813166	-0.334123	0.280686	0.260434	0.196687	-0.345173	-0.400427	-0.131791	-0.0803455	0.0101389	-0.512129	-0.44115	-0.134217	0.047757	0.102738	0.237335	0.285469	0.188992	0.333292	-0.527215	-0.314731	-0.248911	0.122811	0.0225826	0.19614	0.438513	0.251293	0.274137	-0.0211448	0.194711	0.0906818	0.221326	0.383532	0.379739	0.67271	0.722683	0.664153	0.658377	0.712477	0.698046	0.730904
PROCR	-0.550811	-0.619932	-0.37137	-0.299714	-0.726983	-0.704662	-0.774462	-0.468515	0.0571414	0.046394	-0.0894922	-0.588645	-0.660677	-0.377992	-0.236652	-0.188397	-0.363822	-0.359434	0.0206176	0.0484349	0.123673	0.198561	0.44059	0.354424	0.566922	-0.432301	-0.267418	-0.25034	0.068057	-0.124001	0.479278	0.608368	0.456719	0.447098	0.14881	0.260909	0.209371	0.296923	0.41666	0.365483	0.607439	0.635812	0.498091	0.776339	0.719793	0.697941	0.709303
IFITM1	-0.542068	-0.613965	-0.345493	-0.287977	-0.725469	-0.699029	-0.74992	-0.517014	-0.0333144	-0.0251098	-0.180893	-0.658764	-0.728185	-0.443061	-0.275169	-0.239363	-0.329919	-0.347091	0.0528699	0.0245751	0.104903	0.160109	0.460723	0.385564	0.619759	-0.379132	-0.225772	-0.229647	0.0739379	-0.146575	0.563628	0.661433	0.521006	0.50813	0.217105	0.284336	0.255532	0.328712	0.437388	0.373019	0.568921	0.598548	0.437169	0.801346	0.712433	0.697302	0.699731
SDK1	-0.590476	-0.632463	-0.421374	-0.326727	-0.701933	-0.676834	-0.785004	-0.393877	0.171161	0.170564	0.0807753	-0.435944	-0.490049	-0.217896	-0.13224	-0.05786	-0.465218	-0.421514	-0.0885625	0.0241085	0.0858901	0.195649	0.318909	0.234309	0.406052	-0.465854	-0.269087	-0.22837	0.123787	-0.0126855	0.304589	0.505856	0.332987	0.349743	0.0615555	0.22367	0.146861	0.259397	0.406818	0.385779	0.628417	0.677716	0.588791	0.693209	0.705455	0.697052	0.719143
CLDN5	-0.700261	-0.649825	-0.452688	-0.360369	-0.595634	-0.530076	-0.666458	-0.427373	0.0146443	0.188035	0.149324	-0.297609	-0.259987	-0.0113608	0.0298745	0.126435	-0.653685	-0.597054	-0.316507	-0.242433	-0.200163	-0.0820238	-0.0405863	-0.0429907	0.113226	-0.23952	0.0110685	0.00408684	0.396651	0.290369	0.172964	0.457112	0.272702	0.376074	0.17703	0.235316	0.211471	0.328507	0.515037	0.526546	0.453938	0.599087	0.54621	0.531303	0.602796	0.696733	0.701236
SNTB1	-0.635298	-0.647398	-0.479893	-0.358068	-0.675388	-0.647872	-0.80066	-0.305722	0.30879	0.316388	0.279637	-0.259711	-0.294754	-0.0342364	-0.0130413	0.0916555	-0.580839	-0.491133	-0.212151	0.00125524	0.0476856	0.198378	0.183816	0.0992136	0.22351	-0.510609	-0.277323	-0.207738	0.183573	0.111706	0.102232	0.386787	0.189053	0.234983	-0.0435017	0.179821	0.0720794	0.214005	0.393278	0.406969	0.657411	0.729305	0.696916	0.599542	0.691436	0.69664	0.731749
RASGRP3	-0.583947	-0.627483	-0.401028	-0.317534	-0.699595	-0.671025	-0.764493	-0.431824	0.0991776	0.114553	0.00956727	-0.489688	-0.541119	-0.267387	-0.161276	-0.0965538	-0.439571	-0.412703	-0.0647134	0.00367841	0.0692804	0.163604	0.332145	0.256755	0.44528	-0.422432	-0.234475	-0.210505	0.130076	-0.0284004	0.369612	0.546774	0.382735	0.39749	0.11576	0.241948	0.183342	0.284574	0.423485	0.392338	0.5967	0.647569	0.540404	0.711292	0.69856	0.696088	0.711054
PAPLN	-0.592841	-0.62505	-0.381945	-0.311924	-0.682706	-0.644163	-0.724329	-0.482472	-0.00874385	0.0505864	-0.0653331	-0.534609	-0.5698	-0.297122	-0.172862	-0.116352	-0.436756	-0.428026	-0.0690922	-0.0588111	0.00864705	0.0859538	0.296927	0.24415	0.450723	-0.339015	-0.153528	-0.156283	0.176859	-0.00373126	0.428723	0.589358	0.433912	0.458718	0.19699	0.265755	0.236302	0.324891	0.459501	0.420937	0.534919	0.601469	0.47759	0.710757	0.676768	0.696012	0.700003
NOTCH3	-0.617554	-0.623383	-0.358332	-0.307663	-0.646728	-0.589551	-0.65402	-0.557789	-0.179025	-0.0380255	-0.16368	-0.582587	-0.584519	-0.316036	-0.171086	-0.123733	-0.453736	-0.469239	-0.100769	-0.177071	-0.109185	-0.0550509	0.206783	0.195226	0.425557	-0.195522	-0.00756042	-0.0534818	0.27356	0.0650893	0.497567	0.644035	0.499502	0.548218	0.324846	0.300689	0.318439	0.38961	0.52247	0.477057	0.427803	0.527255	0.383781	0.691701	0.634257	0.695684	0.682171
BC028528	-0.695241	-0.648714	-0.454891	-0.360139	-0.599595	-0.53679	-0.674943	-0.416275	0.0380105	0.199568	0.162109	-0.290922	-0.25811	-0.00934674	0.0291362	0.126681	-0.649588	-0.589835	-0.310989	-0.225277	-0.183095	-0.062087	-0.027371	-0.0355539	0.11719	-0.259016	-0.00940381	-0.0104192	0.38208	0.279688	0.163691	0.448962	0.263477	0.363184	0.159118	0.230105	0.199796	0.318938	0.505228	0.51755	0.467961	0.608124	0.557898	0.53326	0.607615	0.695397	0.7023
CTGF	-0.624536	-0.632677	-0.40938	-0.328665	-0.657506	-0.612828	-0.7147	-0.450336	0.0272378	0.112167	0.024532	-0.444491	-0.460109	-0.195488	-0.10332	-0.0316762	-0.507556	-0.478439	-0.148606	-0.102259	-0.043631	0.0513387	0.195446	0.153273	0.338302	-0.327829	-0.120763	-0.117878	0.236032	0.0858275	0.328942	0.533961	0.367076	0.414853	0.168803	0.249099	0.213876	0.314916	0.46737	0.447171	0.523753	0.611733	0.515643	0.651051	0.657143	0.695041	0.702073
TRIM35	-0.600003	-0.62988	-0.409796	-0.323983	-0.683541	-0.650146	-0.751166	-0.426047	0.0949205	0.131009	0.0373841	-0.455288	-0.494213	-0.224821	-0.130457	-0.0602619	-0.472001	-0.439076	-0.103115	-0.0291367	0.0325748	0.131807	0.276837	0.210987	0.392637	-0.400286	-0.202824	-0.181455	0.167094	0.0188426	0.333563	0.528275	0.360702	0.388279	0.118218	0.238453	0.182903	0.287428	0.433775	0.409899	0.578602	0.642626	0.545456	0.682106	0.684184	0.694799	0.709034
NDST3	-0.604474	-0.637263	-0.449247	-0.340061	-0.693581	-0.670337	-0.800078	-0.342608	0.256744	0.247315	0.182497	-0.350159	-0.40081	-0.133967	-0.0799341	0.00887074	-0.511766	-0.444385	-0.137547	0.0320177	0.0868225	0.217673	0.2725	0.181897	0.328724	-0.505795	-0.294044	-0.234258	0.134853	0.0313201	0.204612	0.443846	0.258981	0.284814	-0.00405461	0.198466	0.101184	0.228876	0.390037	0.385303	0.655418	0.709446	0.64852	0.652939	0.703567	0.694729	0.725109
ZC4H2	-0.64763	-0.632116	-0.39537	-0.327747	-0.625938	-0.566241	-0.659451	-0.502181	-0.0963137	0.0543242	-0.0363185	-0.466804	-0.454234	-0.194209	-0.0913163	-0.0243595	-0.530827	-0.516989	-0.184598	-0.198392	-0.140827	-0.0607937	0.111566	0.102266	0.301883	-0.217176	-0.00510231	-0.0340646	0.318128	0.151534	0.365676	0.566568	0.406331	0.475684	0.261256	0.27285	0.272536	0.362202	0.515935	0.493357	0.440522	0.556626	0.449989	0.627057	0.621474	0.694142	0.68837
IGJ	-0.590627	-0.617493	-0.348018	-0.298282	-0.66902	-0.620681	-0.676863	-0.553588	-0.152001	-0.0486545	-0.187399	-0.619028	-0.641338	-0.367943	-0.210813	-0.169738	-0.407098	-0.42752	-0.0462122	-0.118985	-0.0463831	0.0038754	0.289076	0.260103	0.495462	-0.240935	-0.0665993	-0.103677	0.212126	-0.00536026	0.534044	0.658568	0.518025	0.546841	0.304618	0.299609	0.307564	0.376197	0.498908	0.445027	0.462415	0.540202	0.386702	0.728914	0.655203	0.694111	0.683737
FN1	-0.586974	-0.634427	-0.44797	-0.33606	-0.710212	-0.6944	-0.822655	-0.327891	0.298207	0.256779	0.187206	-0.359858	-0.425989	-0.156144	-0.0996209	-0.0123933	-0.485952	-0.416966	-0.105553	0.0800874	0.137107	0.269871	0.327635	0.22169	0.366965	-0.551696	-0.347096	-0.275822	0.0886737	-0.0145872	0.210908	0.441686	0.257022	0.269137	-0.0352255	0.192049	0.0821575	0.211461	0.367893	0.360161	0.689928	0.727869	0.665325	0.674062	0.720625	0.693759	0.728576
GLI3	-0.578729	-0.62928	-0.424016	-0.325204	-0.70991	-0.690445	-0.801009	-0.37326	0.2148	0.190148	0.101687	-0.426306	-0.490518	-0.21806	-0.136479	-0.0609152	-0.453739	-0.404891	-0.0743744	0.0592303	0.121146	0.235603	0.348517	0.252345	0.41807	-0.503655	-0.30992	-0.257906	0.0928514	-0.0372088	0.290487	0.491825	0.317547	0.326194	0.0279145	0.214014	0.124988	0.240957	0.38699	0.366773	0.655413	0.694068	0.609207	0.698771	0.714856	0.693724	0.72032
SMTN	-0.586321	-0.632504	-0.437871	-0.332032	-0.706909	-0.688254	-0.809221	-0.349577	0.255481	0.226779	0.150057	-0.386196	-0.448781	-0.178454	-0.111765	-0.0292386	-0.476631	-0.416488	-0.0978936	0.0628048	0.121491	0.24611	0.326719	0.22764	0.381803	-0.523093	-0.321923	-0.260851	0.0984915	-0.0161397	0.243464	0.463155	0.282928	0.295968	-0.0029909	0.202412	0.103613	0.226933	0.379726	0.367229	0.669	0.710044	0.638346	0.68059	0.714926	0.693655	0.724197
CXCL13	-0.555411	-0.617421	-0.375758	-0.30194	-0.714696	-0.690758	-0.765688	-0.457168	0.06491	0.061699	-0.0657613	-0.5608	-0.626838	-0.34839	-0.216438	-0.16459	-0.380111	-0.370535	-0.00090897	0.0355877	0.107934	0.186781	0.409693	0.327304	0.532721	-0.425019	-0.255587	-0.237484	0.0840577	-0.0987522	0.449832	0.589655	0.436162	0.432906	0.141268	0.254863	0.202549	0.292628	0.416218	0.370237	0.599178	0.633301	0.503809	0.754662	0.708986	0.692588	0.704534
TRPV4	-0.573862	-0.606991	-0.305251	-0.278391	-0.668079	-0.6139	-0.638891	-0.630959	-0.29521	-0.164656	-0.336473	-0.734662	-0.754508	-0.476937	-0.276109	-0.255643	-0.348245	-0.40379	0.0104363	-0.152325	-0.0711678	-0.052961	0.32839	0.315657	0.586231	-0.159091	-0.00458999	-0.0746148	0.216175	-0.0477622	0.672646	0.744835	0.622791	0.644636	0.412637	0.337043	0.380752	0.425985	0.529937	0.454123	0.40309	0.480983	0.288629	0.771916	0.644745	0.69251	0.668032
X42617	-0.590422	-0.622399	-0.387435	-0.313237	-0.679397	-0.642881	-0.728421	-0.462754	0.0226209	0.0735816	-0.0354699	-0.509099	-0.545801	-0.275633	-0.160556	-0.100569	-0.442951	-0.427316	-0.0769699	-0.0479196	0.0175762	0.100727	0.291729	0.234897	0.433016	-0.356326	-0.168896	-0.164268	0.170982	0.00074051	0.399217	0.568189	0.410269	0.435117	0.171982	0.256043	0.218798	0.311442	0.44835	0.41408	0.545507	0.610228	0.494659	0.699069	0.675388	0.691277	0.698352
IL6RA	-0.703353	-0.634545	-0.387265	-0.335363	-0.557745	-0.46959	-0.560786	-0.569065	-0.281043	-0.00642958	-0.0855556	-0.45101	-0.380196	-0.132921	-0.0309206	0.0368808	-0.609676	-0.609498	-0.290247	-0.38328	-0.332691	-0.267436	-0.087029	-0.0354401	0.175661	-0.0260978	0.206453	0.127777	0.488546	0.312531	0.368469	0.587848	0.432325	0.550784	0.398443	0.3023	0.356772	0.434556	0.600494	0.584623	0.29474	0.469885	0.361952	0.551498	0.549688	0.690927	0.665606
TMEM119	-0.536572	-0.605646	-0.328875	-0.280024	-0.713652	-0.683471	-0.724283	-0.541218	-0.0908012	-0.0648443	-0.228448	-0.687006	-0.75059	-0.467646	-0.287989	-0.258694	-0.315243	-0.343999	0.0614979	-1.83e-05	0.0816784	0.125523	0.453391	0.38851	0.632271	-0.336245	-0.188666	-0.206355	0.0876576	-0.145796	0.60111	0.683579	0.550355	0.539254	0.25864	0.295526	0.282064	0.34658	0.449551	0.379587	0.534729	0.56868	0.396784	0.801665	0.697558	0.690533	0.687147
NCKAP1L	-0.55978	-0.616078	-0.373717	-0.30187	-0.705751	-0.678849	-0.753195	-0.463516	0.044495	0.0544733	-0.071658	-0.558436	-0.61818	-0.341738	-0.209948	-0.158262	-0.387094	-0.379186	-0.011663	0.0158848	0.08737	0.164277	0.388053	0.312361	0.518683	-0.403408	-0.232366	-0.219725	0.101769	-0.0818531	0.449833	0.590938	0.438432	0.440299	0.155967	0.257545	0.211328	0.299796	0.424248	0.378954	0.582025	0.622264	0.492726	0.745107	0.699622	0.690518	0.700297
FCER1G	-0.526372	-0.604244	-0.327913	-0.277636	-0.723954	-0.698105	-0.737761	-0.533578	-0.0676523	-0.0603912	-0.227236	-0.694304	-0.767083	-0.482141	-0.300473	-0.272294	-0.299568	-0.327729	0.081054	0.0281644	0.111308	0.156007	0.486749	0.412886	0.65622	-0.362886	-0.219646	-0.230851	0.0603691	-0.173518	0.606557	0.683559	0.55055	0.53124	0.24136	0.292268	0.271665	0.336952	0.437003	0.365006	0.554958	0.579391	0.406054	0.81511	0.708011	0.690377	0.689485
SDC3	-0.600911	-0.629875	-0.42756	-0.330692	-0.681607	-0.652546	-0.767909	-0.382409	0.171408	0.188628	0.111194	-0.396593	-0.438963	-0.173148	-0.100576	-0.0210264	-0.493211	-0.442995	-0.124991	-0.00468318	0.0527203	0.167288	0.264421	0.188574	0.351294	-0.445033	-0.240457	-0.20117	0.156325	0.032072	0.263925	0.481545	0.306158	0.334721	0.0591236	0.217213	0.142436	0.257952	0.411662	0.398262	0.609084	0.669954	0.592356	0.659302	0.686995	0.690236	0.712024
TBXAS1	-0.560402	-0.608129	-0.330771	-0.285396	-0.687716	-0.64714	-0.690731	-0.558708	-0.146284	-0.0752996	-0.23078	-0.668166	-0.70947	-0.431782	-0.257321	-0.225346	-0.352688	-0.382779	0.0141233	-0.0679665	0.0101009	0.0518713	0.37215	0.329013	0.573378	-0.271589	-0.113731	-0.146982	0.153364	-0.0786133	0.586827	0.682449	0.54888	0.557614	0.299765	0.302879	0.306609	0.369207	0.479099	0.414183	0.485208	0.542072	0.373979	0.767941	0.671298	0.689867	0.680495
FLNA	-0.589487	-0.634028	-0.45991	-0.340885	-0.705433	-0.691526	-0.829795	-0.2994	0.344642	0.295007	0.237482	-0.317184	-0.383281	-0.116724	-0.0757759	0.0180696	-0.503944	-0.423288	-0.125435	0.0896911	0.143311	0.286258	0.310258	0.199831	0.332013	-0.5751	-0.364747	-0.282866	0.0880632	0.00155248	0.161347	0.409003	0.219125	0.233982	-0.0714858	0.178027	0.0568391	0.193359	0.355413	0.355416	0.704972	0.743106	0.694474	0.654165	0.719062	0.689837	0.729181
AOAH	-0.539441	-0.603587	-0.318431	-0.276511	-0.705343	-0.670499	-0.704162	-0.566261	-0.144401	-0.097734	-0.267294	-0.710727	-0.766864	-0.484515	-0.295289	-0.270461	-0.311536	-0.349689	0.0615305	-0.0293025	0.0534602	0.0884529	0.438562	0.384492	0.637406	-0.295473	-0.149866	-0.180741	0.108737	-0.136114	0.632123	0.705186	0.576623	0.569794	0.298808	0.307297	0.308244	0.366168	0.466426	0.3924	0.504303	0.545269	0.364619	0.802215	0.686716	0.689775	0.68095
MITF	-0.620284	-0.623283	-0.380444	-0.316303	-0.641963	-0.589388	-0.671915	-0.504552	-0.0880543	0.032941	-0.0718424	-0.507706	-0.512163	-0.248679	-0.131355	-0.0721584	-0.482911	-0.476974	-0.131724	-0.151908	-0.0897075	-0.0166597	0.184786	0.162503	0.369192	-0.246052	-0.0485023	-0.0733138	0.265221	0.0868597	0.409455	0.585432	0.431206	0.482698	0.254336	0.274672	0.269825	0.354502	0.497019	0.465078	0.461652	0.558943	0.44022	0.6603	0.635384	0.689622	0.685051
PEAR1	-0.641466	-0.627141	-0.389665	-0.324014	-0.622539	-0.563129	-0.653418	-0.503879	-0.104235	0.0460035	-0.0466477	-0.472555	-0.460561	-0.201787	-0.0962964	-0.0313304	-0.522018	-0.510737	-0.177921	-0.19743	-0.139523	-0.06224	0.116077	0.107344	0.308145	-0.21185	-0.00289268	-0.0335488	0.314356	0.145497	0.373594	0.569037	0.411183	0.478988	0.266015	0.273509	0.275233	0.362697	0.513875	0.489728	0.434882	0.549544	0.44072	0.62702	0.617435	0.689489	0.682929
FNDC4	-0.617141	-0.625204	-0.398311	-0.322485	-0.650014	-0.604198	-0.699864	-0.460557	-0.00072137	0.0904609	-0.00170314	-0.459554	-0.473462	-0.2108	-0.112149	-0.0446021	-0.494615	-0.471933	-0.139833	-0.110591	-0.0511978	0.0372319	0.196335	0.15848	0.347968	-0.307314	-0.105058	-0.108718	0.23794	0.081115	0.349282	0.544012	0.381846	0.42899	0.188126	0.253702	0.22589	0.321846	0.470004	0.446437	0.506135	0.594502	0.492735	0.650852	0.647985	0.688384	0.692596
PDE4B	-0.564784	-0.622245	-0.417958	-0.319693	-0.711995	-0.695994	-0.803513	-0.366628	0.226429	0.187849	0.0963305	-0.432702	-0.503708	-0.231868	-0.147777	-0.0745316	-0.434919	-0.3873	-0.0558178	0.0803133	0.143171	0.256144	0.373909	0.2719	0.437114	-0.517822	-0.330022	-0.274419	0.0700892	-0.0608789	0.297415	0.49065	0.318749	0.320418	0.0176243	0.210867	0.118145	0.232867	0.374571	0.352083	0.663879	0.694494	0.60779	0.705103	0.716672	0.687458	0.715324
SEMA4C	-0.592123	-0.614706	-0.36063	-0.302932	-0.659884	-0.61357	-0.681294	-0.518897	-0.0993883	-0.00433982	-0.128216	-0.566229	-0.587589	-0.319286	-0.181095	-0.132377	-0.427835	-0.43464	-0.070927	-0.109844	-0.041617	0.0202235	0.264719	0.231442	0.450658	-0.264858	-0.0841277	-0.109283	0.21301	0.0159297	0.473726	0.6179	0.471823	0.50445	0.262725	0.282383	0.277789	0.354485	0.483517	0.439039	0.476297	0.55485	0.418287	0.701655	0.649854	0.686807	0.681524
ARHGAP6	-0.626639	-0.630442	-0.429382	-0.336203	-0.648579	-0.607745	-0.726897	-0.398535	0.110947	0.179555	0.113005	-0.369121	-0.38548	-0.127047	-0.0622918	0.0207298	-0.536643	-0.487015	-0.181461	-0.0825772	-0.0299253	0.0828178	0.167489	0.11671	0.278261	-0.370685	-0.154357	-0.132233	0.23195	0.111498	0.241548	0.475296	0.299632	0.351378	0.103086	0.223589	0.167928	0.281506	0.443242	0.436505	0.550888	0.638147	0.566603	0.615837	0.653886	0.686585	0.70179
TLR13	-0.54398	-0.601027	-0.317656	-0.276819	-0.693224	-0.655394	-0.690061	-0.567674	-0.159395	-0.0992173	-0.264923	-0.699563	-0.748447	-0.469395	-0.283335	-0.257594	-0.322074	-0.360055	0.0457839	-0.0500069	0.0310594	0.0655427	0.410267	0.363127	0.614413	-0.274454	-0.126259	-0.16147	0.128596	-0.113905	0.622589	0.699896	0.571764	0.571243	0.308807	0.307443	0.313378	0.370619	0.472664	0.400869	0.486581	0.53447	0.356449	0.786647	0.674702	0.685645	0.675149
NRG2	-0.593649	-0.61906	-0.393027	-0.31557	-0.666918	-0.629578	-0.721455	-0.446047	0.0395602	0.0947409	-0.00443101	-0.475513	-0.507215	-0.241792	-0.138202	-0.0738665	-0.459595	-0.437064	-0.0990448	-0.056189	0.00603124	0.0945996	0.261826	0.207182	0.396117	-0.355009	-0.162886	-0.155003	0.18366	0.0251637	0.362953	0.544273	0.383949	0.414604	0.157181	0.247387	0.206997	0.303188	0.444283	0.416113	0.541116	0.610481	0.505068	0.675388	0.664867	0.684667	0.693242
MPDZ	-0.598379	-0.631409	-0.46076	-0.342596	-0.687304	-0.668737	-0.809779	-0.300013	0.325298	0.296512	0.246026	-0.29651	-0.35114	-0.0895031	-0.0548218	0.0412611	-0.523529	-0.441436	-0.152617	0.0575284	0.108276	0.251594	0.26422	0.164258	0.293061	-0.544741	-0.32926	-0.25325	0.120045	0.0384832	0.14234	0.39879	0.208715	0.233943	-0.0586471	0.177523	0.0630984	0.19945	0.365222	0.369442	0.679512	0.728844	0.685464	0.629131	0.701402	0.684543	0.721681
CALD1	-0.582757	-0.628722	-0.457087	-0.338076	-0.701885	-0.689236	-0.82699	-0.292954	0.351092	0.296888	0.240068	-0.312843	-0.380525	-0.115865	-0.0760663	0.0173391	-0.497911	-0.416783	-0.121626	0.0962349	0.149486	0.292355	0.314029	0.202038	0.332005	-0.578643	-0.370449	-0.286845	0.0810804	-0.00346671	0.15723	0.403098	0.21432	0.22741	-0.0778843	0.17473	0.0519189	0.188147	0.348732	0.348911	0.705341	0.741015	0.693585	0.650485	0.715708	0.684089	0.724071
CYS1	-0.698492	-0.644232	-0.474502	-0.367526	-0.583799	-0.523662	-0.679923	-0.362812	0.117387	0.268169	0.254347	-0.207418	-0.172026	0.0684282	0.0770607	0.186637	-0.683583	-0.602656	-0.351824	-0.214303	-0.17915	-0.0402075	-0.0694481	-0.0832635	0.0442414	-0.293048	-0.0330341	-0.0162081	0.386586	0.316175	0.0687239	0.385223	0.191152	0.29776	0.0956892	0.203481	0.154446	0.286036	0.482469	0.50972	0.486986	0.629433	0.605864	0.488801	0.597713	0.683684	0.698236
ACKR3	-0.571369	-0.613064	-0.376969	-0.304928	-0.682993	-0.650687	-0.730184	-0.459588	0.0287345	0.0628957	-0.0525871	-0.525995	-0.571685	-0.301724	-0.180237	-0.124649	-0.414382	-0.402706	-0.0484349	-0.0219329	0.0454758	0.124618	0.328745	0.265095	0.465116	-0.370338	-0.191942	-0.184683	0.140957	-0.0338004	0.418209	0.573061	0.419353	0.434418	0.165576	0.254636	0.214762	0.304299	0.434332	0.39552	0.553613	0.607645	0.48688	0.7113	0.677987	0.683651	0.691502
PRKD1	-0.646281	-0.612426	-0.327464	-0.300569	-0.583568	-0.501728	-0.54933	-0.63974	-0.390307	-0.139659	-0.269809	-0.615978	-0.570292	-0.313506	-0.15092	-0.113038	-0.483547	-0.525996	-0.157525	-0.337674	-0.27227	-0.245449	0.0639122	0.10858	0.361395	-0.00273841	0.189957	0.0897337	0.407828	0.17304	0.557506	0.692618	0.562266	0.646295	0.480051	0.337621	0.415379	0.465331	0.597533	0.547908	0.278571	0.423879	0.263245	0.642417	0.563989	0.683412	0.647956
CFAP69	-0.72107	-0.645712	-0.470247	-0.370303	-0.557388	-0.485573	-0.640013	-0.393112	0.0381239	0.239686	0.229123	-0.206021	-0.147235	0.0886442	0.0986742	0.207924	-0.713692	-0.6395	-0.392239	-0.28973	-0.25697	-0.125002	-0.147242	-0.136129	-0.0024536	-0.213949	0.0538216	0.0495181	0.455319	0.379196	0.0754606	0.397708	0.205976	0.332059	0.154883	0.21702	0.191203	0.31731	0.518148	0.547242	0.427143	0.593362	0.567694	0.461064	0.569508	0.683323	0.689532
PTP4A3	-0.544481	-0.607858	-0.365914	-0.295349	-0.706892	-0.683364	-0.753672	-0.458338	0.052225	0.0488689	-0.0810984	-0.567355	-0.633815	-0.358249	-0.22289	-0.174186	-0.365934	-0.36025	0.00866985	0.0362444	0.108822	0.183242	0.414281	0.333241	0.539745	-0.414921	-0.250653	-0.235314	0.0787452	-0.106834	0.460069	0.59135	0.441961	0.436582	0.14835	0.255058	0.206157	0.2926	0.411992	0.363858	0.588164	0.620227	0.487924	0.751703	0.700235	0.683223	0.693883
TNS1	-0.616884	-0.634894	-0.475155	-0.351678	-0.670353	-0.647544	-0.800399	-0.283786	0.339294	0.328502	0.294141	-0.245586	-0.287515	-0.0310803	-0.0142983	0.090091	-0.564552	-0.471653	-0.199773	0.027745	0.0733111	0.225809	0.201515	0.10941	0.226423	-0.532056	-0.304252	-0.226707	0.157895	0.0930362	0.0868091	0.368136	0.172098	0.211534	-0.0700942	0.168926	0.0530967	0.195829	0.371665	0.386284	0.668028	0.73098	0.703054	0.592865	0.687421	0.683013	0.721202
EYA4	-0.618378	-0.614584	-0.360997	-0.307938	-0.624569	-0.565678	-0.636391	-0.537979	-0.167573	-0.0175051	-0.130837	-0.540448	-0.534263	-0.273794	-0.142591	-0.090877	-0.47158	-0.480088	-0.128731	-0.193023	-0.12959	-0.0707069	0.163453	0.15716	0.376091	-0.183679	0.00872416	-0.0355499	0.29282	0.0984407	0.454092	0.613577	0.467873	0.524733	0.312302	0.290089	0.306782	0.380658	0.517499	0.479403	0.412729	0.519087	0.3878	0.656657	0.614165	0.682462	0.669796
PIK3R6	-0.540811	-0.600414	-0.330784	-0.281004	-0.695465	-0.662547	-0.707707	-0.531516	-0.0925277	-0.0536604	-0.208209	-0.657452	-0.71236	-0.435335	-0.265157	-0.232707	-0.332374	-0.356958	0.0363603	-0.020928	0.0573807	0.103857	0.413109	0.355032	0.591702	-0.318372	-0.166388	-0.185542	0.110261	-0.114084	0.571468	0.664187	0.530201	0.52739	0.257341	0.29001	0.278652	0.344542	0.451098	0.386542	0.517224	0.559176	0.395558	0.77414	0.680617	0.682009	0.678192
PLEK	-0.550888	-0.616242	-0.417138	-0.31622	-0.71626	-0.705346	-0.813556	-0.34858	0.260981	0.201222	0.110206	-0.425832	-0.505804	-0.234719	-0.153281	-0.0799569	-0.420405	-0.369422	-0.0405145	0.111349	0.174348	0.290091	0.401036	0.289306	0.44943	-0.547792	-0.364287	-0.299586	0.0412817	-0.0847606	0.287781	0.478464	0.306633	0.300551	-0.00992625	0.202285	0.0998695	0.216477	0.355644	0.333269	0.683977	0.704608	0.620721	0.708655	0.721912	0.68134	0.712778
TBX2	-0.531475	-0.592531	-0.298558	-0.266632	-0.690433	-0.651533	-0.673507	-0.592401	-0.209217	-0.142941	-0.321177	-0.74167	-0.791294	-0.512059	-0.309721	-0.292463	-0.293396	-0.344729	0.0719623	-0.0564747	0.0277088	0.049608	0.430245	0.38779	0.651055	-0.246469	-0.107998	-0.154426	0.12327	-0.135855	0.673795	0.728893	0.608915	0.603854	0.345148	0.319282	0.337583	0.385452	0.47882	0.398482	0.464548	0.510047	0.317714	0.801109	0.668347	0.680333	0.664942
X4930503L19RIK	-0.586624	-0.621667	-0.429761	-0.328044	-0.681022	-0.657538	-0.776985	-0.353062	0.220876	0.215176	0.143202	-0.372046	-0.422558	-0.159771	-0.0960087	-0.0141238	-0.484798	-0.427117	-0.118031	0.02788	0.0838668	0.204516	0.281796	0.195481	0.347739	-0.480207	-0.278184	-0.226479	0.128733	0.0160599	0.234655	0.455617	0.278957	0.301279	0.0192062	0.202934	0.115058	0.234678	0.387615	0.377383	0.631194	0.682633	0.613371	0.652259	0.688544	0.680312	0.707091
PITPNC1	-0.568795	-0.616316	-0.411142	-0.31735	-0.692798	-0.671663	-0.77683	-0.377426	0.186702	0.17159	0.0820266	-0.429169	-0.488948	-0.221913	-0.137474	-0.0654142	-0.443069	-0.399432	-0.072533	0.0453117	0.106565	0.214813	0.335797	0.246208	0.412948	-0.475984	-0.286934	-0.2418	0.100141	-0.032656	0.299233	0.492321	0.323499	0.333762	0.0453725	0.215244	0.134348	0.245111	0.38706	0.36533	0.629442	0.670367	0.583093	0.685983	0.696495	0.680151	0.703807
LOXL2	-0.557528	-0.60081	-0.332201	-0.284673	-0.674061	-0.633562	-0.681358	-0.541458	-0.130786	-0.0588348	-0.206134	-0.638948	-0.677038	-0.40483	-0.23998	-0.205162	-0.360809	-0.385562	-0.000518466	-0.0711277	0.00405102	0.0495358	0.350132	0.308181	0.543871	-0.270737	-0.11104	-0.1411	0.159163	-0.0624324	0.556128	0.65959	0.525322	0.537553	0.285126	0.293895	0.294693	0.359465	0.47132	0.41121	0.479896	0.538918	0.379459	0.745716	0.659219	0.679618	0.671626
TGFB3	-0.562799	-0.61854	-0.430698	-0.323653	-0.705306	-0.692828	-0.812063	-0.3275	0.289059	0.235791	0.158924	-0.379268	-0.452179	-0.185197	-0.120431	-0.03954	-0.451493	-0.389384	-0.075533	0.0988998	0.157585	0.282956	0.358759	0.249404	0.397412	-0.551237	-0.358195	-0.288006	0.0622545	-0.0473169	0.235551	0.447606	0.270042	0.273095	-0.0319788	0.191594	0.083436	0.206827	0.354171	0.340936	0.684605	0.712965	0.643662	0.680359	0.714013	0.679365	0.713369
GJC1	-0.5685	-0.612729	-0.394178	-0.310699	-0.685331	-0.658952	-0.75212	-0.413911	0.112873	0.121251	0.0203757	-0.471349	-0.52401	-0.256694	-0.155792	-0.0914278	-0.429277	-0.400379	-0.0623491	0.0130247	0.0767866	0.171353	0.329613	0.252634	0.433961	-0.42477	-0.241007	-0.213626	0.119831	-0.0315791	0.352058	0.527344	0.365991	0.378843	0.10087	0.232593	0.171045	0.271709	0.407887	0.378564	0.591604	0.638862	0.536724	0.694365	0.685044	0.679346	0.695588
HECTD2	-0.659264	-0.637483	-0.481701	-0.362223	-0.619747	-0.578881	-0.740062	-0.3041	0.255103	0.322845	0.307763	-0.194944	-0.196393	0.0485915	0.0501344	0.161547	-0.637482	-0.542926	-0.2924	-0.0918298	-0.0542247	0.097873	0.0473689	-0.00676417	0.106157	-0.422168	-0.174245	-0.121161	0.276234	0.220445	0.0423047	0.352939	0.154883	0.231151	-0.00887588	0.176569	0.0880065	0.229546	0.419516	0.446109	0.582072	0.686418	0.670621	0.522756	0.637374	0.678458	0.707378
COL6A4	-0.548656	-0.596748	-0.319609	-0.27799	-0.676721	-0.636174	-0.674835	-0.55969	-0.162282	-0.0894579	-0.246944	-0.673004	-0.713622	-0.439838	-0.262301	-0.233647	-0.338505	-0.372789	0.0221583	-0.0703496	0.00763983	0.0444637	0.372496	0.331928	0.577007	-0.257112	-0.104638	-0.141536	0.15046	-0.0839693	0.596006	0.682867	0.553964	0.561338	0.308747	0.302837	0.31105	0.369518	0.475002	0.408138	0.470039	0.52566	0.355055	0.761632	0.659301	0.678387	0.667364
COL4A1	-0.57606	-0.606892	-0.361262	-0.299414	-0.662668	-0.622455	-0.692646	-0.492719	-0.0522489	0.0175077	-0.103421	-0.549889	-0.581219	-0.314806	-0.182626	-0.132706	-0.414157	-0.415086	-0.0573124	-0.07327	-0.00561297	0.0610549	0.29142	0.246537	0.457331	-0.302103	-0.125434	-0.138472	0.180373	-0.00784643	0.453211	0.597343	0.450648	0.47506	0.224966	0.269789	0.252338	0.332313	0.459311	0.416431	0.500651	0.567959	0.437287	0.70084	0.654324	0.678106	0.677637
COL27A1	-0.538114	-0.599014	-0.341551	-0.28433	-0.695294	-0.666244	-0.720412	-0.500378	-0.037242	-0.0149915	-0.159444	-0.619665	-0.678809	-0.404161	-0.248037	-0.209801	-0.342042	-0.355175	0.0264771	0.00145237	0.0771407	0.133724	0.41185	0.345321	0.569127	-0.353021	-0.197658	-0.203625	0.0968442	-0.111552	0.526282	0.632525	0.493736	0.489708	0.214431	0.274903	0.24941	0.322521	0.433021	0.374948	0.54076	0.578419	0.427526	0.760937	0.683601	0.677772	0.679454
SYNGAP1	-0.586454	-0.613506	-0.394523	-0.31424	-0.663226	-0.628472	-0.723365	-0.428076	0.0664842	0.111355	0.0168317	-0.456614	-0.491235	-0.228583	-0.131563	-0.0653847	-0.457971	-0.430583	-0.0997144	-0.0420065	0.0188155	0.111192	0.264116	0.204939	0.38681	-0.371112	-0.179633	-0.165176	0.1725	0.022041	0.341454	0.526429	0.365291	0.393994	0.134943	0.238496	0.191276	0.28996	0.431252	0.405802	0.550064	0.615663	0.516342	0.666461	0.662575	0.677567	0.688811
TLR11	-0.634156	-0.618345	-0.39303	-0.323035	-0.611203	-0.554187	-0.650463	-0.47607	-0.0680338	0.073317	-0.00951321	-0.435619	-0.424212	-0.171206	-0.0783268	-0.00949202	-0.527268	-0.50765	-0.188981	-0.186428	-0.131693	-0.0480272	0.103555	0.0912495	0.279834	-0.227274	-0.0171703	-0.0394055	0.308345	0.15388	0.332905	0.537686	0.378187	0.446664	0.2353	0.259503	0.252664	0.344222	0.497297	0.478983	0.440929	0.553721	0.456376	0.604818	0.608507	0.677361	0.674293
CAV2	-0.588957	-0.618437	-0.422554	-0.325509	-0.670508	-0.643218	-0.758595	-0.367778	0.183323	0.194806	0.120838	-0.381364	-0.42474	-0.163963	-0.0958047	-0.016371	-0.485603	-0.433518	-0.123545	0.00296437	0.0588664	0.173884	0.262224	0.184979	0.341794	-0.447595	-0.246147	-0.203912	0.148215	0.0298519	0.249119	0.46568	0.292241	0.31935	0.0465775	0.209598	0.132216	0.247479	0.399197	0.387392	0.605642	0.663664	0.590301	0.645778	0.676558	0.677177	0.700083
PATZ1	-0.592125	-0.610647	-0.37638	-0.308336	-0.649582	-0.60656	-0.688776	-0.473232	-0.0286033	0.0528418	-0.0525488	-0.499852	-0.521461	-0.259449	-0.145137	-0.0868786	-0.451559	-0.440914	-0.0992648	-0.0936454	-0.0307935	0.0459134	0.238885	0.198706	0.39718	-0.299474	-0.111371	-0.120288	0.209679	0.0386249	0.397515	0.565788	0.412761	0.448919	0.206463	0.259781	0.238058	0.325116	0.461677	0.428876	0.496997	0.57497	0.459822	0.668742	0.644406	0.677156	0.67876
DAAM2	-0.601833	-0.627084	-0.464229	-0.344093	-0.672262	-0.651963	-0.798112	-0.287235	0.332405	0.311972	0.270638	-0.265968	-0.313946	-0.0575406	-0.0329789	0.0666931	-0.539706	-0.452311	-0.175405	0.0433151	0.09083	0.237975	0.230164	0.134611	0.255535	-0.535189	-0.315374	-0.238559	0.137136	0.0656465	0.110525	0.377803	0.186264	0.218314	-0.0662961	0.170657	0.0558028	0.194477	0.363953	0.373725	0.668647	0.724101	0.68962	0.604198	0.687897	0.677035	0.714662
PTGS2	-0.528315	-0.606672	-0.396922	-0.303644	-0.72438	-0.716696	-0.810796	-0.366669	0.233198	0.160915	0.0536813	-0.476836	-0.566859	-0.293332	-0.193065	-0.129515	-0.375596	-0.337697	0.00596657	0.13305	0.200763	0.30453	0.455384	0.339366	0.511525	-0.546227	-0.3769	-0.317173	0.00849056	-0.135195	0.346157	0.508702	0.34531	0.326326	0.0101101	0.211379	0.114426	0.222278	0.349725	0.316507	0.68223	0.690885	0.59076	0.737657	0.726522	0.676353	0.705285
TUBB6	-0.553844	-0.615665	-0.433082	-0.322585	-0.710304	-0.702116	-0.823679	-0.310158	0.324059	0.252553	0.17752	-0.36905	-0.449354	-0.182579	-0.121894	-0.0397607	-0.443843	-0.377223	-0.0663134	0.125354	0.183867	0.313269	0.379164	0.261067	0.403658	-0.580206	-0.389179	-0.310019	0.0393481	-0.0643052	0.221705	0.434749	0.255947	0.253197	-0.0591453	0.183396	0.0655735	0.19187	0.338441	0.32633	0.704948	0.725448	0.660111	0.682602	0.720265	0.676102	0.713698
DNASE1L3	-0.511721	-0.592478	-0.327706	-0.273686	-0.715478	-0.693912	-0.73731	-0.504385	-0.0271849	-0.0365658	-0.196344	-0.664712	-0.742219	-0.462691	-0.290988	-0.260601	-0.293356	-0.314574	0.0821255	0.0511265	0.13199	0.181747	0.491023	0.410248	0.64222	-0.386107	-0.245246	-0.246499	0.041102	-0.180256	0.573722	0.654545	0.521312	0.498385	0.206962	0.277708	0.246922	0.315311	0.414605	0.346557	0.566253	0.584119	0.42011	0.799242	0.701584	0.676082	0.679189
LYZ2	-0.521291	-0.59878	-0.364601	-0.289666	-0.716246	-0.701439	-0.772515	-0.429551	0.109944	0.0700608	-0.0600467	-0.5592	-0.641482	-0.36641	-0.234444	-0.185889	-0.340328	-0.329453	0.036623	0.0899865	0.163183	0.242002	0.463672	0.365729	0.564593	-0.46684	-0.310046	-0.279408	0.0286203	-0.149778	0.44725	0.573362	0.424066	0.404965	0.102715	0.241483	0.176206	0.26571	0.380605	0.332094	0.623726	0.638405	0.509891	0.760818	0.711084	0.674327	0.69098
SLCO2B1	-0.574108	-0.61071	-0.400386	-0.31383	-0.672794	-0.644915	-0.74455	-0.399568	0.125941	0.141268	0.0502906	-0.438475	-0.484978	-0.222126	-0.132492	-0.0636407	-0.448488	-0.412954	-0.0868126	0.000743536	0.0612164	0.161055	0.296106	0.222488	0.39528	-0.420131	-0.230862	-0.201269	0.136464	-0.00375076	0.316677	0.505043	0.341065	0.360812	0.089329	0.225085	0.161477	0.265625	0.406525	0.383373	0.585237	0.638521	0.546272	0.670513	0.674381	0.674078	0.69142
PLA2R1	-0.563864	-0.606527	-0.384493	-0.305665	-0.67713	-0.64895	-0.736718	-0.424796	0.0834555	0.100771	-0.00373201	-0.484097	-0.53364	-0.268296	-0.161773	-0.100911	-0.420451	-0.397504	-0.0577734	0.000564302	0.0648113	0.153326	0.324851	0.253314	0.438886	-0.401719	-0.22148	-0.201169	0.126362	-0.0310978	0.369864	0.536823	0.379637	0.39334	0.12153	0.237492	0.183896	0.279853	0.412701	0.380644	0.572403	0.621687	0.514564	0.692273	0.675299	0.673712	0.686963
PEAK1	-0.577014	-0.618099	-0.442123	-0.33046	-0.684845	-0.668488	-0.798517	-0.30923	0.302083	0.265911	0.205171	-0.327365	-0.387807	-0.127468	-0.080551	0.00793444	-0.488207	-0.415859	-0.120383	0.07041	0.123723	0.257363	0.296646	0.195245	0.330769	-0.536662	-0.332927	-0.261362	0.0977058	0.00515816	0.179927	0.414814	0.232502	0.249081	-0.0438074	0.181841	0.0726367	0.201561	0.357732	0.354676	0.670091	0.711186	0.657389	0.641264	0.696417	0.673693	0.708635
CEP170	-0.573288	-0.610319	-0.404055	-0.314991	-0.672811	-0.646223	-0.748897	-0.389171	0.144498	0.154268	0.0666736	-0.425832	-0.473752	-0.211667	-0.126745	-0.0559396	-0.451812	-0.412428	-0.0901664	0.00822665	0.0678255	0.171071	0.295682	0.219226	0.387721	-0.43179	-0.241357	-0.207339	0.132008	-0.00286792	0.301535	0.494475	0.328861	0.348213	0.0749492	0.220044	0.151689	0.258275	0.400521	0.379546	0.593193	0.645053	0.557068	0.666149	0.675457	0.672742	0.69193
ABI2	-0.587593	-0.618591	-0.443036	-0.332812	-0.671873	-0.650779	-0.782379	-0.315859	0.277894	0.262354	0.205953	-0.316498	-0.366518	-0.10903	-0.0652227	0.0246906	-0.50585	-0.433715	-0.143105	0.0391444	0.090574	0.223532	0.257847	0.166475	0.301597	-0.507011	-0.298472	-0.233777	0.128126	0.0370542	0.171048	0.412502	0.230005	0.255902	-0.0261429	0.184489	0.0829243	0.21112	0.370578	0.370192	0.646991	0.698703	0.647306	0.624091	0.683415	0.672516	0.704826
TGFB2	-0.582413	-0.62022	-0.455999	-0.336781	-0.682141	-0.6674	-0.808134	-0.28208	0.348917	0.305361	0.256744	-0.285104	-0.345231	-0.087299	-0.0560568	0.0395327	-0.509214	-0.424815	-0.142065	0.0788064	0.128812	0.273227	0.278367	0.172541	0.295387	-0.560943	-0.350341	-0.268134	0.0990162	0.0230619	0.130224	0.383413	0.195097	0.214977	-0.0796649	0.168568	0.0479139	0.184601	0.347238	0.352105	0.68681	0.7288	0.688936	0.622925	0.697001	0.672401	0.711918
SGIP1	-0.593403	-0.619321	-0.447005	-0.335425	-0.665705	-0.643046	-0.77808	-0.311567	0.279917	0.271104	0.219674	-0.300947	-0.346515	-0.0908597	-0.0524307	0.0399232	-0.51868	-0.443505	-0.158255	0.0282227	0.0780011	0.213467	0.236827	0.148512	0.280164	-0.500873	-0.288546	-0.223967	0.141208	0.0550716	0.154403	0.403355	0.219227	0.249886	-0.028058	0.182141	0.0808066	0.210709	0.373218	0.37601	0.641626	0.698018	0.65125	0.612101	0.678088	0.671658	0.704052
ST8SIA6	-0.542213	-0.598342	-0.362059	-0.292578	-0.687407	-0.661737	-0.733076	-0.451299	0.0430841	0.0507675	-0.0730922	-0.546623	-0.605947	-0.336871	-0.20743	-0.157854	-0.372565	-0.365646	-0.00716282	0.0186629	0.0885577	0.162652	0.382896	0.308435	0.509764	-0.393919	-0.228776	-0.216362	0.0951075	-0.084553	0.441359	0.576453	0.428705	0.429176	0.151741	0.250763	0.205688	0.291217	0.411305	0.366459	0.567154	0.604905	0.477851	0.727175	0.68124	0.671089	0.680608
ARHGEF6	-0.571895	-0.606983	-0.392674	-0.310215	-0.667179	-0.637433	-0.732363	-0.411269	0.0983388	0.122455	0.027832	-0.451769	-0.495329	-0.233477	-0.138309	-0.0724871	-0.442026	-0.411963	-0.0831892	-0.0114768	0.0496274	0.144112	0.292003	0.223411	0.400775	-0.399426	-0.212738	-0.189799	0.143571	-0.0027819	0.334337	0.515637	0.355008	0.375777	0.109334	0.2305	0.174271	0.274342	0.412652	0.386896	0.568821	0.624367	0.52716	0.670558	0.667319	0.671074	0.685621
NAB2	-0.571601	-0.615282	-0.441277	-0.328867	-0.685389	-0.67076	-0.800856	-0.302764	0.313302	0.270064	0.209574	-0.324625	-0.388	-0.128252	-0.0822895	0.00610891	-0.482705	-0.409319	-0.115093	0.080741	0.134032	0.268431	0.305366	0.200831	0.334469	-0.546034	-0.344004	-0.269475	0.0879068	-0.00286357	0.176449	0.410178	0.228125	0.24208	-0.0530085	0.178721	0.0664011	0.195793	0.350911	0.347898	0.675974	0.713663	0.660885	0.641622	0.697273	0.670765	0.706862
MRC2	-0.577344	-0.604962	-0.379954	-0.306347	-0.655612	-0.619357	-0.705554	-0.444036	0.0277578	0.0806369	-0.021023	-0.480672	-0.513552	-0.252592	-0.145676	-0.085248	-0.439974	-0.421761	-0.0861152	-0.0523952	0.00986463	0.0931819	0.268605	0.214866	0.403869	-0.344575	-0.159605	-0.154148	0.174147	0.0134891	0.37259	0.543021	0.388108	0.41547	0.162323	0.245873	0.208738	0.300488	0.435913	0.405356	0.527995	0.593786	0.485765	0.669628	0.652555	0.670534	0.6779
CCDC85A	-0.599058	-0.605636	-0.371473	-0.307329	-0.628602	-0.579764	-0.661031	-0.482956	-0.0678158	0.0399279	-0.061691	-0.490836	-0.499455	-0.242697	-0.129987	-0.0719141	-0.465214	-0.457389	-0.122045	-0.13318	-0.072511	0.000496802	0.192683	0.166136	0.365023	-0.255345	-0.0643119	-0.0838153	0.245197	0.0740232	0.393346	0.564556	0.413828	0.46051	0.233863	0.263562	0.253801	0.337632	0.47577	0.444923	0.460829	0.551068	0.43701	0.64561	0.62276	0.670219	0.667623
GABBR1	-0.681826	-0.631984	-0.470972	-0.361931	-0.576996	-0.521108	-0.678464	-0.339604	0.148558	0.282913	0.272949	-0.188704	-0.158896	0.0769521	0.0795787	0.189577	-0.671114	-0.586084	-0.343922	-0.191002	-0.157198	-0.0156936	-0.0579159	-0.0783492	0.0408485	-0.312758	-0.0570943	-0.0323251	0.364753	0.30281	0.0483733	0.363879	0.171007	0.272522	0.0684902	0.191894	0.134817	0.267732	0.46164	0.490761	0.496093	0.630972	0.613238	0.478628	0.59218	0.669847	0.687511
TRPS1	-0.600865	-0.622321	-0.46673	-0.344369	-0.66211	-0.64185	-0.792086	-0.272783	0.347067	0.327326	0.293063	-0.24101	-0.286341	-0.0340572	-0.0178766	0.0845586	-0.548215	-0.455885	-0.188653	0.0408078	0.0859164	0.236731	0.211594	0.116777	0.23039	-0.536028	-0.314027	-0.234162	0.142454	0.0799074	0.0838354	0.358701	0.166033	0.201201	-0.0794543	0.163191	0.0454072	0.186372	0.358015	0.372031	0.665883	0.723333	0.696349	0.586339	0.679175	0.669834	0.708793
S1PR3	-0.582347	-0.616751	-0.447063	-0.33314	-0.674326	-0.656415	-0.79156	-0.29889	0.310115	0.280997	0.228185	-0.301367	-0.35623	-0.0994828	-0.0614419	0.0306214	-0.504527	-0.427099	-0.141059	0.0583842	0.109034	0.246686	0.267794	0.169788	0.298781	-0.53074	-0.322333	-0.249638	0.113033	0.0291561	0.152141	0.397654	0.213271	0.235921	-0.0511585	0.176364	0.0662015	0.197763	0.357866	0.359758	0.663434	0.710049	0.664011	0.621719	0.687332	0.669731	0.705302
EMP3	-0.516634	-0.598636	-0.38594	-0.296643	-0.721258	-0.714394	-0.802185	-0.372495	0.217142	0.14265	0.0299352	-0.493462	-0.585784	-0.313447	-0.206419	-0.147186	-0.356573	-0.324392	0.0224753	0.137367	0.20635	0.304355	0.470158	0.354363	0.530302	-0.53827	-0.3754	-0.318978	-0.00149693	-0.151355	0.366974	0.517525	0.358725	0.335642	0.0205055	0.214041	0.120943	0.224337	0.346449	0.309277	0.674069	0.678978	0.57308	0.742608	0.721925	0.669544	0.696921
IGKV2.109	-0.592396	-0.604172	-0.37021	-0.305482	-0.634048	-0.587742	-0.667996	-0.478689	-0.0554024	0.0415255	-0.0621749	-0.495628	-0.509602	-0.251874	-0.137724	-0.0805302	-0.455117	-0.447245	-0.110009	-0.116838	-0.0553062	0.0178659	0.212365	0.18072	0.379469	-0.270021	-0.0818692	-0.0978358	0.229031	0.0573702	0.397337	0.56475	0.41444	0.456215	0.224438	0.261727	0.248094	0.332103	0.468247	0.436055	0.47175	0.556336	0.441213	0.653249	0.62822	0.669499	0.668246
ADAMTSL1	-0.579545	-0.616331	-0.447904	-0.332887	-0.677026	-0.660594	-0.796324	-0.293978	0.321389	0.285886	0.233208	-0.29964	-0.35727	-0.10021	-0.0629999	0.0293447	-0.501503	-0.422813	-0.13702	0.0677554	0.11853	0.257388	0.276243	0.175115	0.302777	-0.540951	-0.333305	-0.257675	0.104772	0.0223067	0.149212	0.394654	0.209843	0.230277	-0.0597106	0.174099	0.0607378	0.193206	0.35296	0.354954	0.670952	0.714723	0.669534	0.623965	0.690375	0.669363	0.706104
MEDAG	-0.509364	-0.594051	-0.367119	-0.287913	-0.720786	-0.711308	-0.785368	-0.406683	0.153826	0.0914908	-0.0357763	-0.544385	-0.635542	-0.361368	-0.235094	-0.184931	-0.330795	-0.314098	0.0472661	0.122425	0.195169	0.279045	0.487206	0.378644	0.570117	-0.501985	-0.347808	-0.305963	0.00053444	-0.169799	0.42803	0.555572	0.404916	0.378834	0.0682711	0.23058	0.153299	0.246379	0.360255	0.313434	0.647773	0.652816	0.529801	0.761477	0.717258	0.668874	0.690013
CLIP3	-0.578233	-0.616677	-0.455906	-0.335623	-0.67928	-0.66571	-0.807569	-0.273542	0.360353	0.312309	0.265883	-0.276077	-0.337377	-0.0811375	-0.0529164	0.0433467	-0.507692	-0.42125	-0.142213	0.0849369	0.134222	0.280105	0.278781	0.171131	0.29059	-0.567131	-0.357155	-0.272155	0.0939427	0.0217391	0.120296	0.374727	0.186362	0.205366	-0.0894707	0.164292	0.0407978	0.178373	0.340837	0.34693	0.68959	0.729855	0.69281	0.617792	0.694745	0.668067	0.708709
PCED1B	-0.631519	-0.623001	-0.460788	-0.347948	-0.623092	-0.586627	-0.734865	-0.312252	0.238989	0.289964	0.261432	-0.234715	-0.247047	-0.00204316	0.014679	0.117021	-0.590953	-0.507256	-0.24684	-0.0644861	-0.0231439	0.118439	0.100192	0.0402368	0.16111	-0.425713	-0.19278	-0.141856	0.238736	0.169786	0.0887076	0.372558	0.183137	0.245856	0.00072357	0.180621	0.0947379	0.228325	0.406288	0.423553	0.581615	0.672383	0.643746	0.544277	0.637885	0.667507	0.695052
TSPAN2	-0.635737	-0.629231	-0.494845	-0.361882	-0.63094	-0.603031	-0.776166	-0.240271	0.377764	0.39037	0.387002	-0.143095	-0.165046	0.0775341	0.059184	0.177676	-0.626093	-0.512606	-0.277722	-0.0131177	0.0221383	0.191012	0.0944419	0.0135865	0.10426	-0.515411	-0.269934	-0.18612	0.212299	0.182153	-0.0233873	0.299249	0.094907	0.156571	-0.104219	0.146089	0.0244967	0.178059	0.368959	0.402924	0.646761	0.729389	0.732254	0.517997	0.653814	0.667188	0.708567
ACTA2	-0.560086	-0.61307	-0.450587	-0.329938	-0.6951	-0.688008	-0.825427	-0.267208	0.385738	0.30998	0.255789	-0.296669	-0.372432	-0.112887	-0.0780132	0.0147505	-0.477515	-0.392977	-0.106319	0.127312	0.179547	0.324132	0.33502	0.214379	0.335839	-0.602782	-0.4015	-0.308809	0.0505242	-0.0259881	0.139881	0.381202	0.194806	0.20011	-0.108486	0.161902	0.0299195	0.166757	0.322923	0.324022	0.71666	0.741673	0.699277	0.642172	0.71004	0.667114	0.710593
LIMS2	-0.576559	-0.6158	-0.459182	-0.336432	-0.679293	-0.667206	-0.811926	-0.262707	0.379534	0.325173	0.281983	-0.263691	-0.326769	-0.0713766	-0.047751	0.0503303	-0.509923	-0.419701	-0.144552	0.0935662	0.142017	0.291212	0.279677	0.168884	0.283983	-0.579494	-0.368707	-0.279088	0.0882286	0.0213444	0.10546	0.363997	0.174153	0.19238	-0.104436	0.159037	0.0306028	0.170533	0.334086	0.34224	0.69791	0.736306	0.703445	0.61365	0.695804	0.666275	0.70883
COL1A1	-0.503552	-0.583836	-0.323305	-0.269702	-0.705965	-0.685156	-0.728153	-0.495541	-0.0232325	-0.0344036	-0.191784	-0.65443	-0.731639	-0.456054	-0.287143	-0.257077	-0.288339	-0.308821	0.082035	0.0532044	0.132925	0.182374	0.486368	0.40581	0.633989	-0.383688	-0.245047	-0.245362	0.0380718	-0.179603	0.564359	0.644085	0.512614	0.489377	0.20128	0.272977	0.241633	0.309343	0.407134	0.340135	0.560408	0.577179	0.415849	0.788315	0.692389	0.666236	0.669667
GPR126	-0.602515	-0.618792	-0.46203	-0.342601	-0.651694	-0.628561	-0.776806	-0.280251	0.322524	0.31595	0.281993	-0.241683	-0.280946	-0.0311867	-0.0138369	0.0874794	-0.551139	-0.461749	-0.196276	0.0213303	0.0657651	0.2133	0.192059	0.104269	0.21947	-0.511704	-0.289525	-0.216018	0.158589	0.0940276	0.0879183	0.361472	0.170905	0.210504	-0.062163	0.166345	0.0557145	0.194007	0.365325	0.379248	0.645999	0.708954	0.680794	0.576971	0.668017	0.66576	0.702141
EMILIN1	-0.49309	-0.583099	-0.328396	-0.269559	-0.717958	-0.703385	-0.749753	-0.473635	0.0273655	-0.0109266	-0.16698	-0.644728	-0.733504	-0.456422	-0.292007	-0.260146	-0.277928	-0.292214	0.0971346	0.0928582	0.172938	0.228347	0.520625	0.426629	0.648573	-0.428604	-0.292361	-0.279622	0.00395316	-0.206813	0.548928	0.629977	0.496047	0.463854	0.163133	0.262879	0.217274	0.289481	0.386493	0.320475	0.593778	0.598849	0.441952	0.797257	0.706057	0.665556	0.674225
TRIL	-0.534907	-0.594556	-0.368162	-0.293097	-0.687888	-0.666503	-0.743735	-0.424516	0.090405	0.0800545	-0.037026	-0.519392	-0.584482	-0.317542	-0.198166	-0.144937	-0.373154	-0.35776	-0.00809304	0.0437936	0.111975	0.19339	0.391098	0.307937	0.49901	-0.426008	-0.260433	-0.236434	0.0763254	-0.0911984	0.408577	0.551227	0.400633	0.397609	0.114512	0.237788	0.180357	0.271041	0.392598	0.351986	0.588465	0.619928	0.502147	0.719041	0.684083	0.665358	0.679623
HRCT1	-0.571201	-0.591608	-0.329202	-0.285213	-0.634034	-0.584018	-0.634989	-0.545032	-0.17859	-0.0633968	-0.198046	-0.601943	-0.616679	-0.355515	-0.201139	-0.163428	-0.394105	-0.418234	-0.0511329	-0.137465	-0.0678655	-0.0240627	0.258661	0.239014	0.469059	-0.20287	-0.0351064	-0.0790137	0.222669	0.00902541	0.524472	0.641438	0.508758	0.541231	0.316667	0.293848	0.310627	0.37312	0.490547	0.437719	0.422251	0.503403	0.352684	0.694454	0.619564	0.665236	0.651905
PLD2	-0.58123	-0.598928	-0.364968	-0.300963	-0.636659	-0.593111	-0.670436	-0.474965	-0.0479086	0.0378627	-0.0690602	-0.50347	-0.523135	-0.265508	-0.148418	-0.0934118	-0.439015	-0.432706	-0.0936877	-0.0997887	-0.0372485	0.0342839	0.234609	0.198265	0.3974	-0.281041	-0.0979266	-0.111405	0.210273	0.0368967	0.405844	0.565869	0.417635	0.453495	0.21776	0.260018	0.243811	0.326527	0.458929	0.424446	0.478604	0.556548	0.439118	0.660134	0.63045	0.665129	0.664725
AFF3	-0.546057	-0.596121	-0.371443	-0.296532	-0.676616	-0.651104	-0.731372	-0.427356	0.0749973	0.0824342	-0.0291522	-0.504278	-0.5599	-0.295532	-0.181021	-0.125422	-0.392711	-0.375805	-0.0318777	0.0164864	0.0825796	0.16499	0.353663	0.278923	0.46812	-0.402922	-0.231774	-0.212525	0.104383	-0.0597035	0.394085	0.545486	0.393675	0.399615	0.125781	0.238677	0.18654	0.27777	0.403399	0.366276	0.570526	0.61185	0.498045	0.701791	0.673238	0.665021	0.677542
NUMBL	-0.532814	-0.599227	-0.398373	-0.304288	-0.700591	-0.68941	-0.788531	-0.354836	0.229204	0.173543	0.0774807	-0.440302	-0.519272	-0.253486	-0.164802	-0.0975804	-0.396051	-0.353327	-0.0250591	0.106222	0.169681	0.276287	0.404563	0.297423	0.460825	-0.522187	-0.347741	-0.290285	0.0369606	-0.0955847	0.309921	0.484599	0.320649	0.312043	0.00962121	0.204579	0.110776	0.219971	0.351569	0.32496	0.658728	0.677438	0.587435	0.702574	0.704197	0.664773	0.692977
COLGALT2	-0.693595	-0.620991	-0.423233	-0.345469	-0.537038	-0.460116	-0.585384	-0.450558	-0.0925409	0.135527	0.099554	-0.292481	-0.228622	0.00359353	0.0484263	0.138389	-0.654393	-0.611406	-0.345023	-0.323719	-0.285468	-0.183798	-0.127539	-0.0988537	0.0606281	-0.127631	0.118979	0.0843788	0.460396	0.34813	0.185182	0.458594	0.286996	0.40813	0.248588	0.2439	0.251805	0.354947	0.536544	0.547793	0.357062	0.523782	0.46743	0.477918	0.540915	0.664354	0.657524
TMEM123	-0.549581	-0.596935	-0.377524	-0.299506	-0.673613	-0.648225	-0.733353	-0.416168	0.0924661	0.0992428	-0.00646025	-0.484265	-0.538431	-0.275551	-0.168327	-0.109455	-0.403997	-0.381846	-0.0442001	0.0162555	0.0806457	0.167665	0.34071	0.265307	0.448845	-0.409734	-0.23503	-0.211984	0.108724	-0.0478634	0.371094	0.531285	0.376866	0.385413	0.112246	0.233124	0.176943	0.271454	0.400288	0.36698	0.574796	0.617825	0.510455	0.691409	0.671673	0.664112	0.678305
MS4A14	-0.592473	-0.596685	-0.354785	-0.299085	-0.616735	-0.564518	-0.635829	-0.505507	-0.122586	0.00144772	-0.107781	-0.517959	-0.521299	-0.266911	-0.142826	-0.0912083	-0.449642	-0.45306	-0.112635	-0.155668	-0.093685	-0.0317805	0.18677	0.169854	0.377756	-0.214493	-0.0295227	-0.0621427	0.257006	0.0734607	0.429498	0.585334	0.441816	0.4898	0.273164	0.273946	0.278796	0.354129	0.48641	0.450076	0.427873	0.521776	0.397583	0.645657	0.607935	0.662744	0.654608
EMID1	-0.519181	-0.582187	-0.319527	-0.271056	-0.681351	-0.651617	-0.693908	-0.514405	-0.0812516	-0.0531217	-0.206064	-0.646241	-0.704646	-0.434283	-0.266526	-0.236243	-0.312368	-0.336972	0.0479478	-0.00558631	0.0715534	0.116219	0.421139	0.360189	0.590924	-0.321717	-0.177088	-0.193062	0.0919919	-0.127589	0.562366	0.647815	0.518327	0.510801	0.243587	0.28104	0.267088	0.330827	0.432149	0.36764	0.51199	0.547431	0.386509	0.760856	0.666726	0.662417	0.659679
PRELP	-0.655444	-0.622451	-0.464116	-0.35357	-0.589747	-0.542523	-0.696087	-0.321484	0.190239	0.28837	0.272596	-0.199844	-0.187423	0.0495206	0.0557285	0.162503	-0.634812	-0.549519	-0.304022	-0.136544	-0.100453	0.0411643	0.00447493	-0.0324334	0.0845631	-0.358939	-0.114084	-0.0774756	0.310118	0.248181	0.057565	0.359599	0.169199	0.254392	0.0353973	0.183636	0.113848	0.246792	0.4332	0.458289	0.528302	0.644046	0.62394	0.49817	0.60507	0.662184	0.684314
NOVA1	-0.5215	-0.577296	-0.296309	-0.262461	-0.667541	-0.629322	-0.655457	-0.566461	-0.189544	-0.12355	-0.290947	-0.701533	-0.747356	-0.477389	-0.287743	-0.267711	-0.297941	-0.342947	0.0560123	-0.0584022	0.0216955	0.0472866	0.402325	0.361432	0.612173	-0.243156	-0.104579	-0.146872	0.127184	-0.117679	0.632888	0.695481	0.57627	0.574776	0.324833	0.305656	0.320431	0.370028	0.464236	0.389957	0.453602	0.500579	0.319789	0.767809	0.64741	0.660917	0.64725
SFXN4	-0.69212	-0.617391	-0.417726	-0.342815	-0.530653	-0.452129	-0.574476	-0.457526	-0.112343	0.12334	0.0858302	-0.298391	-0.231476	-0.000780865	0.0468793	0.134997	-0.651395	-0.611849	-0.345138	-0.334643	-0.296352	-0.198248	-0.135016	-0.101986	0.0598486	-0.110764	0.134377	0.0948899	0.467797	0.352268	0.194251	0.463656	0.294451	0.417197	0.262546	0.246988	0.260383	0.360723	0.540786	0.550796	0.343163	0.512321	0.45342	0.474523	0.53364	0.660866	0.652001
CACNA1D	-0.507695	-0.581336	-0.330056	-0.272714	-0.694218	-0.672649	-0.722622	-0.477963	-0.00375429	-0.0111294	-0.158164	-0.619349	-0.69164	-0.420589	-0.263812	-0.228971	-0.306483	-0.319436	0.0588839	0.0454698	0.121834	0.177351	0.456082	0.377367	0.595952	-0.384183	-0.240304	-0.23678	0.0508593	-0.154434	0.526081	0.619253	0.484887	0.467605	0.184762	0.263933	0.228776	0.300543	0.402995	0.342444	0.557633	0.579115	0.428501	0.764615	0.682763	0.660382	0.665568
SGCD	-0.573822	-0.611906	-0.462518	-0.336772	-0.673536	-0.662764	-0.811666	-0.246175	0.40243	0.343026	0.30602	-0.240872	-0.304145	-0.0517942	-0.0361137	0.0646945	-0.515115	-0.419439	-0.152599	0.0996915	0.146219	0.299782	0.271297	0.158301	0.26603	-0.589709	-0.377499	-0.282591	0.0856775	0.0276897	0.0799408	0.345218	0.153842	0.17284	-0.123387	0.150758	0.0168696	0.159706	0.324981	0.336899	0.702769	0.740438	0.714764	0.600774	0.691598	0.66037	0.705139
OLFM1	-0.566545	-0.608155	-0.448846	-0.330018	-0.674852	-0.663046	-0.801964	-0.268816	0.361832	0.307554	0.259672	-0.278133	-0.342274	-0.0883546	-0.0587003	0.0354474	-0.493757	-0.408954	-0.131362	0.0943499	0.143787	0.287459	0.289466	0.179952	0.298538	-0.568794	-0.363625	-0.27785	0.081984	0.00946477	0.124085	0.37197	0.186467	0.201805	-0.0927984	0.16178	0.0377938	0.173425	0.332266	0.336979	0.687672	0.723643	0.685611	0.616378	0.689969	0.659599	0.700407
NFIC	-0.654765	-0.608807	-0.39898	-0.328127	-0.560771	-0.493222	-0.600702	-0.462124	-0.0944775	0.0946537	0.0354811	-0.361857	-0.32174	-0.0837469	-0.0142866	0.0629446	-0.582408	-0.553812	-0.265575	-0.261714	-0.216017	-0.12703	-0.0204501	-0.00856345	0.164572	-0.161105	0.063599	0.0317118	0.386837	0.253315	0.260561	0.494363	0.332648	0.428097	0.249448	0.250507	0.255364	0.349464	0.513802	0.509763	0.382166	0.522611	0.445382	0.530027	0.560767	0.659204	0.652737
COL3A1	-0.501424	-0.582406	-0.345738	-0.277427	-0.7045	-0.690412	-0.751846	-0.435682	0.082366	0.0421588	-0.0944745	-0.578024	-0.661737	-0.390891	-0.250371	-0.208368	-0.311932	-0.309592	0.0577766	0.0916812	0.165946	0.235585	0.476947	0.38136	0.584217	-0.447763	-0.301075	-0.276415	0.0175534	-0.168383	0.473361	0.581668	0.440261	0.416451	0.11949	0.243889	0.185764	0.26792	0.374491	0.320866	0.603977	0.614374	0.478646	0.760091	0.6972	0.658971	0.672868
PIP4K2A	-0.512471	-0.588101	-0.371656	-0.289581	-0.702293	-0.691163	-0.771895	-0.388425	0.166933	0.112901	-0.00261589	-0.504643	-0.588316	-0.320815	-0.207777	-0.152972	-0.350086	-0.326192	0.0197537	0.107739	0.176382	0.265526	0.44677	0.342718	0.523589	-0.493346	-0.334016	-0.290088	0.0192261	-0.137696	0.386285	0.527506	0.374905	0.356695	0.0553646	0.220901	0.141936	0.238256	0.356657	0.316955	0.6364	0.648179	0.536852	0.730221	0.700848	0.658857	0.68104
LIFR	-0.608502	-0.598733	-0.372332	-0.308727	-0.599535	-0.544784	-0.630845	-0.477256	-0.0877083	0.0471239	-0.0425471	-0.453704	-0.446427	-0.198294	-0.0970161	-0.0352383	-0.492305	-0.480908	-0.161727	-0.175572	-0.11967	-0.0451181	0.125618	0.11305	0.304381	-0.215298	-0.0173948	-0.0434284	0.287996	0.126908	0.358076	0.542877	0.391954	0.453099	0.2453	0.259505	0.257567	0.341724	0.485047	0.461271	0.42529	0.530548	0.426296	0.604803	0.594821	0.658785	0.653784
PYGM	-0.599988	-0.614011	-0.466715	-0.343389	-0.64349	-0.621728	-0.775663	-0.259123	0.351035	0.339336	0.313818	-0.210981	-0.249753	-0.0040831	0.00259305	0.107652	-0.559538	-0.462943	-0.208629	0.027106	0.0688938	0.222199	0.17828	0.0882853	0.193816	-0.523222	-0.298708	-0.21871	0.157543	0.104764	0.0537331	0.336772	0.144082	0.185399	-0.0858338	0.155728	0.0384272	0.180559	0.354469	0.373548	0.651018	0.713826	0.695285	0.559055	0.66186	0.658234	0.697354
CHST15	-0.643768	-0.600927	-0.365335	-0.312924	-0.558017	-0.484905	-0.567894	-0.525276	-0.213048	0.00164979	-0.0831164	-0.452231	-0.408221	-0.167266	-0.0635158	-0.00239198	-0.539124	-0.53853	-0.224768	-0.294157	-0.241958	-0.178573	0.00376949	0.0304336	0.231664	-0.0905911	0.119336	0.0599246	0.395871	0.225526	0.36953	0.56299	0.415874	0.507533	0.338894	0.280976	0.315716	0.391103	0.541203	0.520176	0.330933	0.473493	0.365698	0.561494	0.550426	0.658143	0.639955
MYL4	-0.587329	-0.59432	-0.364599	-0.301511	-0.617568	-0.569918	-0.649667	-0.473353	-0.0648272	0.039697	-0.0601692	-0.48194	-0.490976	-0.238871	-0.128218	-0.0712513	-0.455716	-0.447928	-0.118675	-0.128885	-0.0692705	0.00249885	0.1911	0.164455	0.359549	-0.252424	-0.0651698	-0.0838411	0.238937	0.0710086	0.386099	0.553894	0.405941	0.45126	0.228225	0.258388	0.248292	0.330661	0.466088	0.435733	0.453646	0.541617	0.429667	0.634367	0.611863	0.657763	0.655398
ASB2	-0.543208	-0.599613	-0.422921	-0.315298	-0.686669	-0.677166	-0.796847	-0.302177	0.310511	0.247559	0.176949	-0.352254	-0.426757	-0.168259	-0.111454	-0.0304728	-0.439774	-0.374095	-0.0741161	0.111729	0.167779	0.29431	0.354147	0.242363	0.380066	-0.556237	-0.368099	-0.292644	0.0490247	-0.0501064	0.208965	0.42001	0.24545	0.246276	-0.0540993	0.178442	0.0655618	0.188827	0.333132	0.322873	0.679378	0.703109	0.641397	0.657061	0.696601	0.657602	0.693624
ARHGAP22	-0.573345	-0.594103	-0.374552	-0.302554	-0.6353	-0.597011	-0.683438	-0.437421	0.0166285	0.0803053	-0.0158211	-0.461577	-0.487545	-0.233391	-0.131667	-0.0709147	-0.44411	-0.425353	-0.0999921	-0.0695128	-0.00983057	0.0724215	0.2387	0.191627	0.37578	-0.322327	-0.137356	-0.135238	0.189292	0.033927	0.356089	0.528816	0.376189	0.408921	0.166891	0.241743	0.208936	0.299182	0.434591	0.406878	0.505615	0.576635	0.473253	0.645212	0.632559	0.657156	0.663185
ITGA4	-0.526862	-0.588934	-0.375011	-0.293574	-0.684954	-0.667986	-0.752474	-0.392425	0.143383	0.114748	0.00683673	-0.483589	-0.553756	-0.290392	-0.183957	-0.126162	-0.376177	-0.350591	-0.0130878	0.0687878	0.134444	0.22445	0.393656	0.301833	0.480063	-0.458979	-0.292373	-0.25557	0.0586448	-0.0936183	0.366605	0.519253	0.365467	0.359813	0.0722479	0.222085	0.151112	0.24774	0.371407	0.336454	0.609203	0.63481	0.528886	0.7049	0.68401	0.656964	0.676497
DENND2A	-0.539124	-0.583131	-0.336012	-0.280928	-0.656345	-0.621652	-0.67874	-0.490082	-0.0612725	-0.0115463	-0.143165	-0.57774	-0.62017	-0.35792	-0.213928	-0.173265	-0.361984	-0.372567	-0.0113724	-0.0417599	0.0283907	0.0846051	0.34066	0.289513	0.503768	-0.305406	-0.146146	-0.159618	0.138048	-0.0588869	0.488333	0.604759	0.46841	0.478558	0.226317	0.268157	0.252002	0.323588	0.437	0.386045	0.495659	0.547679	0.407392	0.710869	0.64562	0.656553	0.655348
HHIPL1	-0.51012	-0.579467	-0.335243	-0.274893	-0.686326	-0.66455	-0.719782	-0.463955	0.0132165	0.00710054	-0.132333	-0.593284	-0.662636	-0.394805	-0.247106	-0.208694	-0.319099	-0.326231	0.0428795	0.0420395	0.11598	0.176241	0.435942	0.357825	0.569082	-0.387024	-0.23947	-0.232431	0.05827	-0.137631	0.497375	0.600398	0.463792	0.450346	0.170632	0.256791	0.218072	0.293037	0.398834	0.343029	0.557454	0.581714	0.439142	0.747858	0.676507	0.656076	0.662828
CCDC141	-0.662655	-0.618007	-0.459073	-0.35262	-0.569751	-0.516672	-0.668947	-0.332649	0.149569	0.274069	0.261432	-0.193122	-0.167895	0.0642081	0.0695742	0.175937	-0.647902	-0.565871	-0.325761	-0.176048	-0.14192	-0.00431821	-0.0402209	-0.0635166	0.0545909	-0.314637	-0.0669791	-0.0412718	0.345375	0.282484	0.0558326	0.360197	0.172161	0.267658	0.0641232	0.18816	0.130635	0.260161	0.448	0.474671	0.492364	0.620273	0.600571	0.476697	0.584279	0.656038	0.673834
HEY2	-0.617675	-0.603595	-0.406618	-0.323533	-0.597509	-0.548674	-0.660939	-0.406369	0.039187	0.147442	0.0865401	-0.351699	-0.347673	-0.104585	-0.0414678	0.0375494	-0.537944	-0.496241	-0.207239	-0.142318	-0.0940067	0.00780428	0.0947427	0.0671926	0.226791	-0.287597	-0.0744181	-0.0710827	0.279369	0.159405	0.236677	0.464761	0.298914	0.364704	0.148399	0.225067	0.191449	0.295323	0.453528	0.448604	0.475988	0.579332	0.509147	0.565183	0.601058	0.655706	0.663202
MAP7D1	-0.575014	-0.596898	-0.396129	-0.311083	-0.638866	-0.606217	-0.708843	-0.38924	0.107456	0.146078	0.0667701	-0.400172	-0.43225	-0.180291	-0.101893	-0.0306362	-0.466495	-0.4282	-0.120412	-0.0360593	0.0194627	0.119464	0.233814	0.173256	0.337147	-0.380138	-0.187257	-0.163626	0.171951	0.0424584	0.281486	0.479428	0.317325	0.34943	0.0978026	0.21855	0.162456	0.265624	0.409288	0.392654	0.546982	0.612653	0.530243	0.62626	0.641444	0.655483	0.670553
LILRA5	-0.56948	-0.586747	-0.342071	-0.289157	-0.624236	-0.577382	-0.640728	-0.503974	-0.115854	-0.0135697	-0.132086	-0.54355	-0.558907	-0.303658	-0.170182	-0.124351	-0.413034	-0.421984	-0.0746129	-0.121811	-0.0569452	-0.000333179	0.237332	0.211329	0.422907	-0.233648	-0.0600754	-0.0895284	0.218008	0.0273263	0.457651	0.594955	0.45656	0.491628	0.266477	0.2735	0.275082	0.346442	0.46999	0.427285	0.440208	0.52023	0.3883	0.665109	0.614004	0.655437	0.648213
CD68	-0.481966	-0.572587	-0.316636	-0.262133	-0.708228	-0.693426	-0.734048	-0.477952	0.00687497	-0.0285995	-0.187904	-0.654176	-0.742248	-0.468421	-0.299335	-0.271328	-0.262765	-0.28232	0.10678	0.0892985	0.169694	0.219307	0.522728	0.431715	0.655863	-0.412204	-0.281603	-0.273547	0.00153942	-0.213467	0.563231	0.634203	0.505217	0.471503	0.175867	0.264513	0.224453	0.291971	0.384251	0.315531	0.577768	0.581735	0.420884	0.79363	0.695018	0.655356	0.661941
PMEPA1	-0.563159	-0.581846	-0.319888	-0.279335	-0.621884	-0.570984	-0.618139	-0.54679	-0.196565	-0.075817	-0.211174	-0.603381	-0.615463	-0.358288	-0.202083	-0.166872	-0.385568	-0.413205	-0.0489489	-0.145573	-0.076461	-0.0369315	0.251046	0.235543	0.465941	-0.184806	-0.0206731	-0.0689461	0.226159	0.0109213	0.529964	0.640881	0.512131	0.545306	0.327423	0.294138	0.316148	0.375023	0.489363	0.435486	0.404766	0.486943	0.334721	0.685317	0.606586	0.65501	0.639794
ZC3H12C	-0.552738	-0.589945	-0.376292	-0.298957	-0.652807	-0.623951	-0.711605	-0.410714	0.0800284	0.103201	0.00526213	-0.459396	-0.503661	-0.247253	-0.147493	-0.0866389	-0.418569	-0.394337	-0.0681039	-0.00953369	0.0516569	0.13922	0.298386	0.231813	0.409886	-0.383543	-0.205481	-0.18649	0.134187	-0.0155201	0.347875	0.515588	0.361768	0.379056	0.118608	0.229548	0.178361	0.272637	0.404022	0.375172	0.550554	0.602496	0.501601	0.663371	0.651564	0.654052	0.666725
CADM3	-0.635713	-0.612566	-0.453571	-0.345052	-0.59294	-0.550104	-0.697745	-0.317133	0.197915	0.278565	0.25663	-0.215578	-0.212342	0.0241527	0.0363882	0.138831	-0.605886	-0.524297	-0.275374	-0.109614	-0.0717015	0.0660814	0.0416982	-0.00230055	0.116142	-0.373826	-0.13814	-0.098514	0.279268	0.213306	0.0752896	0.363298	0.177131	0.252377	0.0276369	0.181635	0.108827	0.238764	0.418236	0.438929	0.53679	0.641562	0.616621	0.509731	0.607343	0.653906	0.676967
ARHGEF10	-0.630147	-0.60506	-0.416256	-0.329544	-0.58398	-0.532066	-0.652646	-0.394205	0.0485187	0.170027	0.120904	-0.314298	-0.300901	-0.0620379	-0.0119435	0.0729288	-0.566882	-0.51751	-0.24128	-0.164241	-0.119778	-0.0115811	0.0486099	0.0270026	0.177862	-0.277228	-0.0554589	-0.0512086	0.306816	0.199073	0.196224	0.441919	0.27208	0.348185	0.140398	0.218583	0.184216	0.292466	0.457698	0.460306	0.466325	0.579531	0.52061	0.537754	0.589652	0.653441	0.661609
MEIS2	-0.57486	-0.60799	-0.470339	-0.339462	-0.662513	-0.652438	-0.809509	-0.221317	0.435214	0.373494	0.348146	-0.199895	-0.260496	-0.0131443	-0.0117999	0.0944775	-0.531522	-0.426302	-0.173932	0.100674	0.143553	0.304914	0.246112	0.132067	0.227656	-0.60012	-0.383132	-0.281044	0.0912316	0.0485033	0.0343626	0.314174	0.119365	0.14266	-0.150399	0.138213	-0.00305391	0.145053	0.314946	0.334109	0.70664	0.746555	0.733674	0.576108	0.683261	0.652732	0.700605
DTNA	-0.604924	-0.614525	-0.489557	-0.352768	-0.637217	-0.619333	-0.791854	-0.206722	0.439259	0.410616	0.406795	-0.133975	-0.173695	0.0667038	0.0450501	0.162364	-0.592203	-0.473943	-0.243577	0.0475974	0.0833951	0.255794	0.150182	0.0508673	0.132594	-0.569973	-0.334844	-0.234572	0.154041	0.1318	-0.0364356	0.277628	0.074968	0.120581	-0.154221	0.130052	-0.00893418	0.146823	0.331135	0.364231	0.682091	0.74444	0.751209	0.525198	0.661538	0.652515	0.700271
IKBIP	-0.567503	-0.58383	-0.343579	-0.28906	-0.619867	-0.573697	-0.639387	-0.49412	-0.103299	-0.0034795	-0.118219	-0.529619	-0.5448	-0.291666	-0.162955	-0.115591	-0.415943	-0.421782	-0.0796885	-0.11898	-0.0553362	0.00367664	0.231275	0.204307	0.411422	-0.238419	-0.0641225	-0.090705	0.217073	0.0317264	0.442338	0.583482	0.444378	0.480082	0.255818	0.268522	0.267193	0.340103	0.464566	0.424125	0.441847	0.521631	0.394014	0.656529	0.61053	0.651249	0.645228
CD53	-0.509621	-0.576089	-0.340323	-0.276341	-0.678742	-0.65779	-0.718592	-0.445599	0.0377997	0.0287019	-0.102697	-0.564645	-0.63274	-0.368503	-0.230808	-0.188694	-0.329111	-0.329528	0.029373	0.0447528	0.116182	0.181896	0.42039	0.340954	0.543503	-0.395888	-0.245452	-0.232929	0.0600945	-0.124997	0.465475	0.578153	0.439292	0.428258	0.150339	0.24755	0.20319	0.281823	0.390532	0.339691	0.561121	0.58623	0.45262	0.730917	0.670819	0.650117	0.659214
IL6ST	-0.511049	-0.585417	-0.392489	-0.296725	-0.696963	-0.691495	-0.790023	-0.331138	0.263799	0.185582	0.0910282	-0.42814	-0.516052	-0.254236	-0.169285	-0.102894	-0.374991	-0.329262	-0.00755199	0.13902	0.20193	0.310143	0.429912	0.313411	0.469451	-0.548589	-0.381069	-0.314443	0.00475269	-0.121043	0.296388	0.465877	0.304058	0.286961	-0.020286	0.192887	0.0897043	0.19955	0.326677	0.300385	0.672739	0.68021	0.594166	0.698384	0.701547	0.650109	0.681838
ART3	-0.564771	-0.601253	-0.44951	-0.329259	-0.660754	-0.648386	-0.790815	-0.254976	0.370915	0.320323	0.279906	-0.251948	-0.311906	-0.0633004	-0.0421071	0.0544628	-0.502194	-0.413103	-0.146439	0.0873367	0.134043	0.280505	0.26546	0.158454	0.269597	-0.563234	-0.35618	-0.268808	0.0908212	0.0272445	0.0971607	0.352101	0.16626	0.185751	-0.102443	0.154432	0.0292229	0.166368	0.327059	0.336125	0.67912	0.718277	0.687808	0.594664	0.677156	0.649958	0.691498
SNX32	-0.60689	-0.606383	-0.454931	-0.339589	-0.616594	-0.586579	-0.735242	-0.281882	0.281898	0.307587	0.282563	-0.214659	-0.236417	0.00312566	0.0134882	0.115634	-0.569536	-0.481154	-0.230539	-0.0281033	0.0120158	0.156399	0.124099	0.0537389	0.164463	-0.455886	-0.230141	-0.168062	0.203796	0.144738	0.066613	0.346638	0.159274	0.21322	-0.0364276	0.165561	0.0683045	0.203255	0.376782	0.395497	0.596919	0.675533	0.65328	0.535144	0.632863	0.649313	0.68119
CLEC7A	-0.484884	-0.564628	-0.295592	-0.25415	-0.686227	-0.662526	-0.690198	-0.520238	-0.0927296	-0.0879761	-0.25621	-0.690438	-0.763079	-0.492765	-0.308169	-0.288212	-0.256452	-0.29278	0.103023	0.0318433	0.113299	0.146535	0.486986	0.417423	0.656279	-0.331873	-0.205168	-0.221786	0.0434473	-0.190228	0.613551	0.667949	0.54829	0.523744	0.249084	0.284024	0.271181	0.326242	0.413384	0.338235	0.515653	0.533608	0.358551	0.786352	0.668558	0.648889	0.645298
DOCK4	-0.548733	-0.587622	-0.388675	-0.302545	-0.652116	-0.62798	-0.726227	-0.37309	0.146161	0.149168	0.0632744	-0.414116	-0.463558	-0.21021	-0.127229	-0.0595817	-0.429302	-0.391466	-0.0793878	0.0176641	0.0757025	0.175209	0.297248	0.220511	0.383088	-0.42488	-0.243078	-0.208293	0.117534	-0.0130553	0.293878	0.477385	0.31802	0.333676	0.0670992	0.211271	0.143183	0.245962	0.381839	0.360689	0.578366	0.624955	0.539272	0.647234	0.65463	0.648314	0.667561
SLA	-0.511242	-0.572629	-0.327033	-0.271411	-0.668874	-0.642772	-0.694658	-0.474585	-0.0248291	-0.0108527	-0.14969	-0.593569	-0.653562	-0.390184	-0.240804	-0.204311	-0.32235	-0.334134	0.0316121	0.0122817	0.0850756	0.140025	0.405585	0.338386	0.551746	-0.348775	-0.201445	-0.204243	0.0825381	-0.116218	0.503199	0.603648	0.470675	0.463916	0.197035	0.261159	0.233578	0.304168	0.409091	0.353145	0.525638	0.558159	0.413915	0.732118	0.657897	0.64828	0.65103
PDLIM3	-0.567066	-0.603488	-0.467706	-0.336603	-0.66229	-0.654222	-0.810456	-0.214838	0.445175	0.375467	0.349705	-0.1989	-0.262972	-0.0165769	-0.0154117	0.0901491	-0.522715	-0.417157	-0.165905	0.112488	0.155478	0.31683	0.25741	0.140032	0.233977	-0.608992	-0.394837	-0.289989	0.0791527	0.0376069	0.0332006	0.310028	0.116214	0.136092	-0.159054	0.135048	-0.00904975	0.138904	0.306851	0.325542	0.711595	0.747271	0.734774	0.576772	0.683179	0.648237	0.697146
CCDC80	-0.542133	-0.588668	-0.402305	-0.306438	-0.662864	-0.645811	-0.75385	-0.335642	0.224045	0.195955	0.118532	-0.379692	-0.440371	-0.18677	-0.117501	-0.0437878	-0.431967	-0.380806	-0.0775413	0.0617173	0.118185	0.230076	0.320303	0.227634	0.376644	-0.483946	-0.300247	-0.246232	0.0848395	-0.0291545	0.249269	0.445162	0.279654	0.288482	0.00820607	0.193589	0.104573	0.216501	0.355587	0.340116	0.621687	0.657334	0.584261	0.645641	0.668992	0.64743	0.674581
HEY1	-0.560573	-0.584311	-0.366969	-0.296431	-0.629314	-0.592878	-0.676416	-0.431173	0.0189313	0.0762106	-0.0208633	-0.46161	-0.490284	-0.239087	-0.13652	-0.0778523	-0.429767	-0.412428	-0.0895458	-0.0599726	-0.000355971	0.079734	0.248193	0.199331	0.381923	-0.323605	-0.143669	-0.140595	0.177147	0.0221839	0.35794	0.524182	0.374624	0.403751	0.162527	0.238421	0.204996	0.293263	0.424912	0.396071	0.502783	0.569443	0.465625	0.641847	0.626303	0.647191	0.653455
LY6C1	-0.542832	-0.566314	-0.275881	-0.257834	-0.613762	-0.55724	-0.574153	-0.616632	-0.334778	-0.186897	-0.352294	-0.707629	-0.71615	-0.457687	-0.261307	-0.246076	-0.327224	-0.38836	0.00357248	-0.179464	-0.102983	-0.0946856	0.282416	0.283698	0.545705	-0.10137	0.0426586	-0.0375187	0.231065	-0.0266048	0.657175	0.717454	0.60767	0.634802	0.429922	0.327592	0.38453	0.420297	0.515878	0.441719	0.341562	0.424166	0.236308	0.718371	0.589463	0.647163	0.61827
WWTR1	-0.539243	-0.592555	-0.431256	-0.31694	-0.674813	-0.667829	-0.797025	-0.267265	0.359528	0.286855	0.229878	-0.302524	-0.376901	-0.124635	-0.0852527	0.00196899	-0.453362	-0.37564	-0.0934301	0.123187	0.175039	0.311352	0.333993	0.217837	0.339748	-0.577775	-0.385756	-0.299058	0.0456858	-0.0341593	0.153145	0.379851	0.201525	0.204684	-0.0943595	0.160976	0.0364587	0.166305	0.314936	0.313053	0.689971	0.712907	0.666904	0.629308	0.688152	0.646175	0.686931
CYP7B1	-0.528214	-0.58268	-0.384892	-0.296853	-0.667861	-0.651451	-0.746861	-0.359005	0.184957	0.155037	0.063299	-0.426927	-0.4925	-0.236544	-0.149761	-0.0846241	-0.398982	-0.36068	-0.0435711	0.0673082	0.1278	0.228029	0.355913	0.263707	0.425327	-0.469565	-0.296447	-0.250683	0.0685774	-0.0628545	0.304161	0.476558	0.318435	0.31934	0.0374594	0.205115	0.125043	0.228494	0.358403	0.333443	0.611323	0.640799	0.552399	0.669144	0.670513	0.645462	0.66889
ZFP57	-0.543156	-0.565391	-0.279139	-0.259004	-0.611002	-0.554987	-0.574968	-0.607304	-0.320977	-0.175131	-0.336489	-0.693292	-0.701451	-0.444454	-0.253188	-0.235923	-0.33279	-0.3903	-0.00321077	-0.177305	-0.102028	-0.090672	0.275468	0.275713	0.533352	-0.107368	0.0383562	-0.0387068	0.231536	-0.0206266	0.640884	0.706416	0.595201	0.62343	0.418862	0.322946	0.37662	0.414503	0.511761	0.440145	0.344887	0.427776	0.244493	0.710732	0.587715	0.644999	0.617438
ITGA1	-0.58496	-0.603855	-0.476372	-0.343158	-0.638955	-0.624681	-0.789497	-0.207549	0.435989	0.393398	0.381833	-0.1556	-0.203387	0.0364723	0.0231871	0.135027	-0.561174	-0.448781	-0.213538	0.0696458	0.107593	0.274118	0.186154	0.0816749	0.166894	-0.577049	-0.351914	-0.251262	0.126172	0.0972659	-0.011206	0.286194	0.0889258	0.125014	-0.153837	0.130494	-0.00862265	0.142608	0.319101	0.34672	0.684682	0.737018	0.736841	0.53759	0.661776	0.64382	0.691404
TFEC	-0.510342	-0.565327	-0.304542	-0.262249	-0.653586	-0.620188	-0.65728	-0.518574	-0.120837	-0.0737634	-0.225006	-0.640492	-0.68929	-0.427498	-0.259151	-0.23208	-0.307147	-0.337141	0.0395065	-0.0339557	0.0411881	0.0787948	0.388091	0.338836	0.569052	-0.277709	-0.136723	-0.162834	0.112537	-0.107916	0.564152	0.643376	0.520291	0.51863	0.268179	0.281793	0.279808	0.337397	0.435295	0.370781	0.471508	0.513812	0.352411	0.735264	0.637732	0.643694	0.636735
PVT1	-0.591464	-0.584894	-0.367129	-0.302292	-0.589507	-0.538368	-0.624871	-0.455446	-0.0626542	0.0588153	-0.026891	-0.434868	-0.43172	-0.189088	-0.0935583	-0.0317478	-0.479815	-0.465114	-0.155335	-0.156817	-0.102473	-0.0263095	0.132394	0.114948	0.298204	-0.228719	-0.0354054	-0.055067	0.269704	0.116689	0.33859	0.521743	0.372746	0.429774	0.222207	0.248449	0.240272	0.324957	0.465463	0.443513	0.428974	0.527862	0.429199	0.591749	0.585869	0.643174	0.64064
PLD4	-0.508345	-0.566103	-0.313435	-0.265228	-0.657741	-0.627873	-0.671543	-0.496063	-0.0761844	-0.0446453	-0.189576	-0.616255	-0.670047	-0.408687	-0.24974	-0.218499	-0.312538	-0.334072	0.035936	-0.0123742	0.0613738	0.106743	0.3947	0.337372	0.558847	-0.309213	-0.16601	-0.181284	0.0980291	-0.111525	0.533829	0.622333	0.495288	0.491215	0.234285	0.271064	0.257317	0.320595	0.421229	0.360897	0.494333	0.531875	0.379021	0.730665	0.644188	0.642891	0.640425
COL5A2	-0.484929	-0.566177	-0.330895	-0.267309	-0.68844	-0.67456	-0.72985	-0.434601	0.0636421	0.0253387	-0.1131	-0.581196	-0.663929	-0.398925	-0.255382	-0.21753	-0.293316	-0.295927	0.0674805	0.0891264	0.162985	0.226471	0.475928	0.383607	0.586342	-0.4292	-0.289672	-0.26928	0.0133672	-0.1746	0.482111	0.579419	0.444197	0.41869	0.129115	0.24261	0.18988	0.266788	0.367575	0.31185	0.583703	0.592348	0.454257	0.749384	0.679994	0.642295	0.654237
SEMA7A	-0.471383	-0.561702	-0.316478	-0.259044	-0.696424	-0.684162	-0.728572	-0.453145	0.0365612	-0.0080913	-0.159687	-0.623958	-0.713297	-0.445353	-0.286251	-0.255871	-0.261939	-0.275278	0.101275	0.101145	0.178897	0.232844	0.515289	0.420928	0.634555	-0.424506	-0.294794	-0.279701	-0.0072781	-0.210415	0.530712	0.606929	0.477781	0.443451	0.149688	0.251935	0.204871	0.274933	0.367389	0.303032	0.581039	0.582068	0.430421	0.773915	0.685063	0.641661	0.651108
ESM1	-0.597643	-0.586764	-0.381673	-0.308978	-0.585138	-0.535362	-0.633299	-0.426834	-0.0148738	0.10037	0.0279561	-0.388782	-0.384441	-0.144776	-0.0662162	0.00321086	-0.50323	-0.475762	-0.180121	-0.150368	-0.0997309	-0.0122379	0.109687	0.0883817	0.25801	-0.251888	-0.0510265	-0.0599408	0.273411	0.138249	0.284835	0.487831	0.332551	0.393813	0.185429	0.234393	0.214695	0.307502	0.455044	0.441743	0.44451	0.545153	0.461554	0.570431	0.584993	0.641241	0.643349
CACNG7	-0.543594	-0.58098	-0.384024	-0.299227	-0.643338	-0.618893	-0.71593	-0.370335	0.140534	0.146048	0.0613034	-0.4093	-0.457005	-0.206782	-0.124685	-0.0578248	-0.425909	-0.38884	-0.0805112	0.0136868	0.0709409	0.168964	0.289948	0.215336	0.376359	-0.416069	-0.235955	-0.202623	0.119633	-0.00974405	0.290841	0.472544	0.315115	0.33157	0.0692861	0.20953	0.14338	0.244712	0.379258	0.358445	0.568763	0.61601	0.531206	0.638441	0.645734	0.640884	0.659496
GJA1	-0.47261	-0.567763	-0.357469	-0.274958	-0.707578	-0.707138	-0.781783	-0.361296	0.214125	0.116891	-0.00432284	-0.51188	-0.615538	-0.350577	-0.234434	-0.18455	-0.300117	-0.276562	0.0686848	0.172366	0.242873	0.330567	0.516762	0.39426	0.570106	-0.541797	-0.39817	-0.340719	-0.047732	-0.202761	0.393078	0.515321	0.368134	0.330199	0.0150975	0.207915	0.114899	0.209639	0.316984	0.272746	0.665895	0.654136	0.5412	0.743777	0.706239	0.639844	0.667033
CREB5	-0.601297	-0.600598	-0.46435	-0.341452	-0.609896	-0.583769	-0.742072	-0.245007	0.339799	0.349559	0.337116	-0.167624	-0.192376	0.0422594	0.0357712	0.144134	-0.579694	-0.478723	-0.244174	-0.00727767	0.0292129	0.18416	0.115251	0.0372937	0.132297	-0.487782	-0.258904	-0.183161	0.191964	0.152015	0.0123921	0.307201	0.115562	0.16929	-0.0828331	0.147373	0.0357338	0.177969	0.355394	0.381926	0.616074	0.690957	0.683982	0.513237	0.629694	0.639667	0.677236
HGF	-0.470182	-0.561549	-0.325541	-0.262143	-0.697299	-0.688015	-0.739644	-0.429367	0.0800406	0.0224347	-0.121376	-0.594985	-0.687691	-0.421211	-0.272997	-0.23797	-0.270255	-0.274562	0.0933371	0.118616	0.194403	0.256426	0.514665	0.413588	0.617397	-0.452248	-0.319582	-0.294122	-0.0175119	-0.208358	0.495755	0.582882	0.449714	0.414483	0.116227	0.240446	0.18222	0.258103	0.353877	0.294574	0.60034	0.598111	0.456304	0.764559	0.688413	0.63938	0.653157
ITGB2	-0.504991	-0.562224	-0.307694	-0.262111	-0.653204	-0.622513	-0.663014	-0.501731	-0.0919696	-0.0561675	-0.203259	-0.623614	-0.67601	-0.41581	-0.253622	-0.224453	-0.306623	-0.331532	0.0394301	-0.018236	0.055822	0.0977384	0.3933	0.338713	0.562502	-0.297061	-0.156141	-0.175168	0.100492	-0.112455	0.544042	0.627483	0.502895	0.49894	0.245241	0.273601	0.264097	0.324681	0.423228	0.361264	0.484013	0.522268	0.36656	0.72974	0.638778	0.639358	0.635291
CRYAB	-0.572711	-0.598142	-0.471706	-0.338604	-0.641871	-0.630923	-0.793378	-0.200816	0.449023	0.392876	0.3787	-0.160815	-0.215151	0.0244288	0.0130978	0.12309	-0.544654	-0.432935	-0.196744	0.0900997	0.128916	0.294575	0.210187	0.0998563	0.184381	-0.592121	-0.372116	-0.267595	0.104682	0.0753085	-0.00594362	0.284678	0.0892089	0.118783	-0.164858	0.12734	-0.0158285	0.134656	0.307467	0.333174	0.69428	0.739048	0.737486	0.543982	0.664558	0.638812	0.687805
ST3GAL2	-0.571945	-0.593404	-0.455152	-0.331904	-0.632271	-0.61615	-0.767415	-0.23411	0.378504	0.345744	0.321702	-0.19781	-0.244587	-0.00561752	-0.00221825	0.100621	-0.532316	-0.434314	-0.189033	0.0576565	0.0984873	0.251212	0.200514	0.102845	0.200394	-0.541323	-0.326255	-0.238777	0.12509	0.0789851	0.0413427	0.31562	0.127427	0.160126	-0.112333	0.143046	0.0185398	0.159386	0.326802	0.345776	0.65599	0.707368	0.6925	0.548673	0.651272	0.636351	0.678234
ADCY7	-0.521503	-0.567404	-0.341726	-0.278219	-0.642159	-0.613855	-0.680947	-0.437623	0.0142047	0.0388102	-0.0772692	-0.516877	-0.565053	-0.311729	-0.188807	-0.141864	-0.363552	-0.35916	-0.0209121	-0.00808548	0.057272	0.125209	0.335852	0.273804	0.466504	-0.346367	-0.187167	-0.182522	0.113695	-0.0582727	0.419848	0.550032	0.410784	0.417949	0.163624	0.242055	0.207174	0.286419	0.401781	0.360022	0.517003	0.560933	0.440011	0.67919	0.635742	0.635652	0.641864
ANK2	-0.565765	-0.594575	-0.471485	-0.336883	-0.642648	-0.634163	-0.797373	-0.190435	0.467253	0.400969	0.387833	-0.154661	-0.213017	0.0256825	0.0121326	0.122449	-0.538479	-0.424607	-0.190797	0.104784	0.14339	0.310761	0.221154	0.106237	0.187464	-0.606554	-0.388426	-0.279193	0.0913457	0.0653611	-0.0135902	0.276587	0.081068	0.107242	-0.179601	0.12233	-0.0258164	0.125802	0.297592	0.323824	0.703519	0.74368	0.744321	0.543571	0.665961	0.634907	0.685763
SYDE1	-0.484005	-0.566483	-0.368572	-0.28104	-0.68889	-0.685649	-0.770931	-0.340347	0.233389	0.148686	0.043148	-0.460498	-0.55381	-0.295301	-0.196913	-0.139624	-0.333131	-0.298999	0.0281122	0.150684	0.216043	0.312323	0.461904	0.345218	0.508083	-0.533593	-0.380335	-0.319802	-0.0188157	-0.156481	0.337507	0.481472	0.32962	0.303321	-0.00157143	0.196938	0.10103	0.20154	0.317019	0.282653	0.655947	0.654646	0.557225	0.706902	0.690515	0.633505	0.662292
OLFR558	-0.543788	-0.570405	-0.353572	-0.287018	-0.619117	-0.583954	-0.661416	-0.429903	0.00692573	0.0610453	-0.0391993	-0.468977	-0.499424	-0.25233	-0.145703	-0.0912248	-0.408705	-0.396057	-0.0747067	-0.0547734	0.00512364	0.079686	0.257816	0.209431	0.392619	-0.314157	-0.141773	-0.141096	0.166015	0.00818856	0.369869	0.524344	0.380331	0.405562	0.16796	0.237315	0.207086	0.290741	0.416394	0.384745	0.490625	0.553134	0.446069	0.637944	0.614991	0.633484	0.638536
LCP2	-0.53072	-0.567144	-0.343994	-0.280743	-0.629161	-0.596966	-0.666922	-0.438644	-0.000186205	0.041488	-0.0687456	-0.500056	-0.538898	-0.288902	-0.171284	-0.122103	-0.381615	-0.37562	-0.0441698	-0.0344207	0.028664	0.0974848	0.298274	0.24453	0.43464	-0.323196	-0.159014	-0.158855	0.140544	-0.0273382	0.403845	0.542327	0.402266	0.418137	0.173577	0.241981	0.212198	0.291817	0.410841	0.372696	0.498183	0.551541	0.435033	0.660084	0.623219	0.633288	0.637849
HPSE	-0.525998	-0.572344	-0.381738	-0.29427	-0.646328	-0.627751	-0.725134	-0.348972	0.178962	0.160343	0.0762548	-0.400819	-0.458639	-0.209995	-0.130954	-0.0643055	-0.407737	-0.367103	-0.0624605	0.0490192	0.106312	0.207055	0.320363	0.23492	0.38982	-0.448752	-0.274186	-0.230701	0.0863113	-0.0372811	0.279659	0.457639	0.300848	0.30834	0.038081	0.199276	0.122402	0.225476	0.356626	0.335891	0.589806	0.625481	0.543956	0.640853	0.649785	0.631987	0.654562
CFP	-0.551155	-0.569828	-0.351955	-0.287737	-0.607983	-0.568703	-0.645872	-0.438698	-0.0197354	0.0524808	-0.0457436	-0.465324	-0.487127	-0.242361	-0.136243	-0.0816423	-0.419906	-0.409143	-0.0904326	-0.0818381	-0.0231126	0.0492806	0.227866	0.188486	0.372899	-0.285757	-0.110558	-0.117079	0.19088	0.0321405	0.36903	0.526201	0.383051	0.415522	0.187454	0.241089	0.218846	0.300705	0.428027	0.397521	0.468512	0.539632	0.432732	0.625495	0.603375	0.631924	0.634143
FCGR3	-0.470934	-0.546248	-0.269763	-0.240251	-0.662091	-0.633925	-0.64788	-0.545154	-0.166571	-0.139146	-0.315647	-0.719045	-0.783384	-0.519386	-0.321573	-0.310518	-0.233137	-0.28427	0.113827	2.13e-05	0.0822812	0.100111	0.472245	0.416819	0.665189	-0.27193	-0.154673	-0.189074	0.0599625	-0.187785	0.655291	0.688518	0.579936	0.557741	0.300047	0.294989	0.302303	0.345235	0.423598	0.341958	0.464561	0.48763	0.300902	0.777067	0.64062	0.631508	0.620378
COL5A1	-0.483435	-0.552333	-0.297239	-0.253287	-0.658814	-0.633413	-0.667884	-0.49574	-0.0790327	-0.0646561	-0.218522	-0.640708	-0.70422	-0.443958	-0.275415	-0.250721	-0.274808	-0.303181	0.0719291	0.0146281	0.0908078	0.129201	0.437443	0.373827	0.598944	-0.317879	-0.18689	-0.201449	0.0640341	-0.152951	0.562627	0.631139	0.510706	0.495133	0.233627	0.27091	0.256777	0.314626	0.405745	0.339017	0.497107	0.52244	0.361673	0.744241	0.643527	0.631334	0.628761
FAM171B	-0.553011	-0.585077	-0.440602	-0.322212	-0.638271	-0.625437	-0.766934	-0.242808	0.365951	0.320226	0.285055	-0.231641	-0.287174	-0.0468533	-0.0309341	0.0650593	-0.497862	-0.408331	-0.15353	0.0789705	0.123068	0.267926	0.243569	0.141028	0.245815	-0.545899	-0.341708	-0.255903	0.0963906	0.0390838	0.0798496	0.333872	0.151696	0.173845	-0.103942	0.147498	0.0249107	0.159955	0.318593	0.330052	0.658344	0.699344	0.673796	0.56908	0.655021	0.631146	0.671984
TRAM2	-0.49073	-0.554918	-0.313525	-0.260893	-0.654589	-0.630647	-0.677733	-0.464763	-0.0266346	-0.0190181	-0.158392	-0.590581	-0.652805	-0.395568	-0.245544	-0.212442	-0.300891	-0.315247	0.0446496	0.0216225	0.0937906	0.144682	0.412741	0.344855	0.555193	-0.343562	-0.204128	-0.206902	0.0682835	-0.129265	0.503997	0.594427	0.466967	0.45607	0.193456	0.255716	0.228924	0.295759	0.394716	0.337449	0.514587	0.541914	0.397574	0.721437	0.64313	0.629804	0.632326
CNN2	-0.490298	-0.564936	-0.371719	-0.283218	-0.67669	-0.670905	-0.760052	-0.334908	0.230947	0.157653	0.0590303	-0.438718	-0.524821	-0.270015	-0.178793	-0.118694	-0.349344	-0.311861	0.00683392	0.132452	0.195313	0.293981	0.4294	0.318342	0.4764	-0.519502	-0.36176	-0.302699	0.00122058	-0.129878	0.315301	0.468378	0.315265	0.296069	-0.0010333	0.193762	0.0997334	0.201675	0.320709	0.290604	0.643244	0.649045	0.557804	0.687201	0.679281	0.62956	0.657907
CMKLR1	-0.480755	-0.555897	-0.329818	-0.265132	-0.669568	-0.655035	-0.713742	-0.417966	0.0720703	0.0384458	-0.091305	-0.550333	-0.627931	-0.370009	-0.236186	-0.195964	-0.30107	-0.29919	0.0506702	0.0803742	0.15092	0.216957	0.447081	0.358184	0.552022	-0.420167	-0.279282	-0.257537	0.0234443	-0.154107	0.451072	0.555426	0.42058	0.399832	0.118857	0.233688	0.180194	0.258245	0.360517	0.309727	0.570897	0.583144	0.453783	0.722093	0.662511	0.628688	0.641253
RNASE6	-0.529589	-0.564109	-0.352244	-0.283274	-0.62311	-0.592976	-0.670825	-0.412428	0.0400916	0.0733344	-0.0266562	-0.46295	-0.502292	-0.256012	-0.15169	-0.0973344	-0.393579	-0.377892	-0.0589474	-0.0241346	0.0359545	0.112967	0.285067	0.227162	0.405513	-0.343168	-0.175301	-0.16585	0.137296	-0.0159634	0.361326	0.512747	0.369021	0.386462	0.141392	0.228998	0.189437	0.274734	0.397649	0.365935	0.50993	0.562473	0.45792	0.6416	0.619874	0.627126	0.63561
LEPREL2	-0.506307	-0.561137	-0.350238	-0.277915	-0.647159	-0.627013	-0.702273	-0.394872	0.0937241	0.0838021	-0.0236663	-0.479835	-0.540417	-0.289424	-0.180476	-0.128642	-0.35766	-0.340544	-0.0139236	0.0409348	0.104378	0.183439	0.362114	0.283436	0.460831	-0.404908	-0.246952	-0.222491	0.0743803	-0.0798835	0.373865	0.512808	0.369488	0.368004	0.101431	0.221529	0.165423	0.252568	0.368824	0.332434	0.556915	0.587519	0.479648	0.672848	0.644282	0.627044	0.641305
MYO1F	-0.520549	-0.547832	-0.269286	-0.249457	-0.599726	-0.547897	-0.565731	-0.586986	-0.301003	-0.170389	-0.329995	-0.680891	-0.69452	-0.443607	-0.255447	-0.239938	-0.31171	-0.368127	0.0106886	-0.155371	-0.0811374	-0.0704398	0.289483	0.284521	0.535371	-0.11877	0.0194695	-0.0521783	0.2078	-0.0385766	0.629461	0.688247	0.580891	0.60296	0.398784	0.312546	0.361145	0.397783	0.48988	0.418473	0.345984	0.420497	0.240575	0.699723	0.576952	0.626154	0.600577
RNY3	-0.493671	-0.555398	-0.330998	-0.26792	-0.651111	-0.630557	-0.691737	-0.424172	0.043057	0.0358504	-0.0873417	-0.532765	-0.596666	-0.343146	-0.214488	-0.172129	-0.324374	-0.322133	0.0199587	0.0401252	0.107895	0.173473	0.394827	0.31889	0.511095	-0.382092	-0.234934	-0.221574	0.0628807	-0.111476	0.435907	0.549511	0.414408	0.405956	0.139572	0.235887	0.191804	0.269149	0.375795	0.329001	0.540569	0.566595	0.441376	0.697242	0.644206	0.625682	0.635051
TAGLN	-0.545512	-0.582745	-0.455975	-0.32625	-0.642102	-0.636472	-0.790614	-0.195024	0.454659	0.377918	0.356124	-0.179811	-0.244918	-0.0072	-0.0108471	0.0931327	-0.50618	-0.399837	-0.160585	0.12187	0.162735	0.32258	0.254279	0.136129	0.222195	-0.606136	-0.398603	-0.29128	0.0668495	0.0324211	0.016575	0.288208	0.0990982	0.116434	-0.172471	0.124493	-0.0212411	0.124582	0.287893	0.307974	0.700162	0.731421	0.723727	0.555214	0.663476	0.625197	0.674928
LGI4	-0.572321	-0.567999	-0.360708	-0.294717	-0.575055	-0.527509	-0.614663	-0.430267	-0.0367867	0.0719425	-0.008349	-0.410576	-0.410713	-0.175269	-0.0870753	-0.0250867	-0.467214	-0.448683	-0.151057	-0.139299	-0.0871357	-0.00927466	0.134352	0.112707	0.286193	-0.239743	-0.0513338	-0.0645203	0.252466	0.109343	0.31395	0.495932	0.349353	0.402877	0.197466	0.235556	0.221211	0.306303	0.443824	0.424448	0.429302	0.522184	0.430568	0.573109	0.572683	0.623876	0.623847
SLC25A4	-0.49746	-0.565309	-0.392842	-0.292364	-0.667181	-0.663707	-0.770348	-0.288289	0.305638	0.222271	0.144822	-0.364741	-0.448904	-0.199816	-0.135544	-0.0638059	-0.383977	-0.326619	-0.0314011	0.142935	0.199753	0.315779	0.393016	0.276094	0.412063	-0.554433	-0.385703	-0.30983	0.0061005	-0.0964333	0.229784	0.413114	0.250835	0.238084	-0.0592933	0.170748	0.0588259	0.173077	0.302516	0.28604	0.665436	0.673641	0.606381	0.651171	0.675242	0.623723	0.659309
SATB1	-0.551595	-0.575565	-0.418505	-0.312883	-0.618392	-0.598106	-0.726084	-0.281954	0.273516	0.261967	0.216962	-0.269543	-0.312532	-0.0755474	-0.0436029	0.0438443	-0.485646	-0.41278	-0.150779	0.0306008	0.0761225	0.204682	0.218099	0.134247	0.253314	-0.473375	-0.274834	-0.211679	0.129239	0.0533469	0.131444	0.366758	0.194283	0.222908	-0.0364047	0.165576	0.0680323	0.190668	0.34296	0.347363	0.601682	0.653499	0.613423	0.56497	0.630725	0.62342	0.654848
KCNMB1	-0.531651	-0.576224	-0.439436	-0.316946	-0.645717	-0.640814	-0.783277	-0.215416	0.419407	0.34057	0.305845	-0.222166	-0.291843	-0.05239	-0.0402234	0.0558166	-0.475079	-0.380476	-0.129124	0.127566	0.172018	0.321107	0.286875	0.169076	0.266303	-0.59292	-0.395427	-0.295515	0.0512357	0.00118336	0.0660597	0.315888	0.133778	0.143698	-0.146402	0.134516	-0.00313195	0.134821	0.289484	0.300932	0.690177	0.715526	0.694023	0.575726	0.663931	0.622248	0.66862
PTGIS	-0.53912	-0.573633	-0.422271	-0.311762	-0.630275	-0.616563	-0.747192	-0.259933	0.323828	0.283888	0.239565	-0.261562	-0.316826	-0.0784989	-0.0503511	0.0383795	-0.472295	-0.39376	-0.13297	0.0722475	0.118294	0.25226	0.255452	0.157722	0.270786	-0.518793	-0.323613	-0.24737	0.0925623	0.0230553	0.118098	0.353184	0.178791	0.197601	-0.0745956	0.155413	0.0436084	0.170303	0.321065	0.325975	0.635077	0.674274	0.63806	0.574742	0.644151	0.621693	0.658342
CSF2RB	-0.464096	-0.547643	-0.32598	-0.259815	-0.672279	-0.662832	-0.72056	-0.401795	0.101032	0.0466127	-0.0839233	-0.547462	-0.634151	-0.377476	-0.244607	-0.205432	-0.282129	-0.278471	0.0694261	0.111091	0.182031	0.24921	0.476368	0.378303	0.568051	-0.446477	-0.311451	-0.281851	-0.00665836	-0.180894	0.446697	0.545498	0.411993	0.382813	0.0950043	0.22594	0.164187	0.242851	0.341264	0.289631	0.587576	0.589316	0.461311	0.726107	0.665788	0.620569	0.636149
MRVI1	-0.559637	-0.581515	-0.461023	-0.330616	-0.620134	-0.608772	-0.768946	-0.19136	0.439759	0.388327	0.377804	-0.145817	-0.19626	0.0353766	0.0207175	0.129218	-0.536888	-0.42613	-0.200183	0.0822812	0.118947	0.281754	0.192223	0.0864039	0.166013	-0.573285	-0.357231	-0.255187	0.108576	0.0835148	-0.0171415	0.270061	0.0790117	0.1104	-0.163078	0.121752	-0.0178176	0.129669	0.299473	0.32653	0.672514	0.718488	0.720138	0.521166	0.642789	0.620008	0.66789
MCHR1	-0.546503	-0.54243	-0.256305	-0.248977	-0.552773	-0.483706	-0.496204	-0.630871	-0.426596	-0.219703	-0.375001	-0.679227	-0.657571	-0.416286	-0.22502	-0.211774	-0.34827	-0.416738	-0.0454312	-0.268608	-0.198212	-0.200522	0.172765	0.206328	0.465978	0.00707968	0.15366	0.0488267	0.308143	0.0527322	0.642343	0.704963	0.603853	0.654186	0.490498	0.331751	0.417157	0.443354	0.539445	0.469991	0.247788	0.356875	0.173069	0.652923	0.526873	0.617714	0.578915
ADAMTSL2	-0.483579	-0.537092	-0.266058	-0.240344	-0.623575	-0.586206	-0.602646	-0.549774	-0.214789	-0.145515	-0.310442	-0.685459	-0.727388	-0.473964	-0.285462	-0.272005	-0.263889	-0.315029	0.0663601	-0.0640429	0.0130044	0.0286538	0.38527	0.35149	0.595004	-0.205464	-0.080874	-0.129095	0.120783	-0.120101	0.627247	0.672462	0.56576	0.562817	0.332042	0.295515	0.31875	0.359075	0.442415	0.367381	0.408216	0.452455	0.273462	0.72854	0.602298	0.617528	0.601044
DDAH2	-0.518625	-0.561977	-0.387002	-0.293825	-0.63126	-0.615253	-0.720859	-0.313917	0.224081	0.196087	0.125206	-0.351924	-0.409456	-0.168213	-0.105912	-0.033898	-0.417404	-0.365778	-0.0796466	0.0600302	0.113061	0.222299	0.300197	0.211029	0.350161	-0.466526	-0.289576	-0.235732	0.0820155	-0.0227697	0.225829	0.417145	0.257868	0.267306	-0.000149531	0.18159	0.094192	0.202755	0.33702	0.324196	0.596292	0.630778	0.564421	0.611048	0.637878	0.617178	0.644082
CAP2	-0.555282	-0.576205	-0.446879	-0.324079	-0.613865	-0.599574	-0.750391	-0.214986	0.389608	0.35186	0.332866	-0.176144	-0.222874	0.00827812	0.00563019	0.108042	-0.522202	-0.422227	-0.188871	0.0638339	0.102349	0.254935	0.192567	0.0946112	0.18409	-0.53908	-0.328424	-0.23827	0.117451	0.0792985	0.0210999	0.293578	0.10867	0.140382	-0.126092	0.132915	0.00641503	0.146261	0.310765	0.332009	0.646244	0.6949	0.685819	0.527031	0.633635	0.616699	0.659557
ECSCR	-0.482295	-0.541239	-0.295729	-0.251436	-0.633974	-0.606153	-0.644371	-0.481243	-0.0804332	-0.0535114	-0.197018	-0.605438	-0.659794	-0.408093	-0.250438	-0.223013	-0.288322	-0.312459	0.0468608	-0.00605609	0.0660324	0.106452	0.393598	0.337368	0.553282	-0.296696	-0.162902	-0.178864	0.0854069	-0.120541	0.528204	0.605767	0.485962	0.478615	0.230272	0.26276	0.250973	0.309445	0.403005	0.342183	0.474443	0.507307	0.356191	0.709546	0.620029	0.616212	0.613191
IRAK3	-0.519042	-0.549316	-0.320274	-0.268096	-0.603226	-0.566164	-0.624071	-0.460912	-0.0708217	-0.00481144	-0.121164	-0.521763	-0.550938	-0.307858	-0.179489	-0.138054	-0.363524	-0.370737	-0.039211	-0.0691294	-0.00590428	0.0488976	0.276209	0.237273	0.435206	-0.26284	-0.106506	-0.123578	0.161182	-0.0184098	0.437902	0.558567	0.428702	0.448567	0.222038	0.251585	0.241386	0.309856	0.421435	0.378194	0.446561	0.506534	0.380495	0.646367	0.593917	0.615811	0.613112
WDFY4	-0.483256	-0.552507	-0.36193	-0.277091	-0.656872	-0.648978	-0.735247	-0.33444	0.208745	0.14684	0.0503888	-0.430869	-0.510752	-0.262346	-0.172088	-0.113756	-0.346026	-0.311245	0.000345713	0.115145	0.176334	0.270958	0.406419	0.302665	0.458996	-0.492067	-0.336765	-0.283471	0.0138103	-0.116279	0.31209	0.461868	0.312911	0.297565	0.0117708	0.192629	0.105574	0.203829	0.320688	0.291184	0.616996	0.627009	0.536693	0.667714	0.658904	0.615527	0.641466
JDP2	-0.548106	-0.542362	-0.263737	-0.252005	-0.550177	-0.482319	-0.500971	-0.613451	-0.397833	-0.196182	-0.344165	-0.653303	-0.631747	-0.392369	-0.210596	-0.193286	-0.359254	-0.420554	-0.0574141	-0.262396	-0.194046	-0.190075	0.162599	0.193287	0.444964	-0.00770408	0.14241	0.0441623	0.307495	0.0622985	0.612138	0.685096	0.580742	0.632666	0.468106	0.323192	0.401573	0.432234	0.531781	0.467035	0.257427	0.366539	0.191211	0.6411	0.526251	0.615522	0.579532
TRIB2	-0.53218	-0.559649	-0.376656	-0.292309	-0.608054	-0.582199	-0.681932	-0.346511	0.142543	0.157976	0.0856261	-0.3645	-0.403163	-0.165876	-0.0970467	-0.0282338	-0.431784	-0.390188	-0.103666	-0.00362742	0.0484382	0.147638	0.243202	0.176012	0.324022	-0.39216	-0.212374	-0.179566	0.136091	0.021199	0.248236	0.436543	0.282102	0.30586	0.0602502	0.196369	0.132135	0.232954	0.36773	0.353553	0.539446	0.592444	0.519652	0.59258	0.612007	0.614353	0.632787
PKNOX2	-0.498544	-0.537997	-0.275154	-0.246565	-0.605412	-0.563488	-0.588314	-0.540004	-0.214383	-0.125306	-0.277368	-0.645454	-0.674762	-0.426652	-0.251777	-0.232302	-0.297182	-0.341102	0.026034	-0.0958382	-0.0231886	-0.00177834	0.327395	0.302852	0.537682	-0.184819	-0.0505574	-0.100316	0.157417	-0.0711174	0.585146	0.649271	0.538865	0.548992	0.330415	0.289987	0.315223	0.359365	0.450409	0.383528	0.390335	0.447625	0.280334	0.695633	0.586152	0.614221	0.597448
RASSF2	-0.482412	-0.553852	-0.377779	-0.282901	-0.660566	-0.657647	-0.755931	-0.296346	0.281117	0.197287	0.11317	-0.385034	-0.470939	-0.224126	-0.151327	-0.0852661	-0.360155	-0.310497	-0.0120196	0.1449	0.203104	0.311231	0.407633	0.292322	0.43306	-0.539673	-0.37922	-0.308628	-0.00371084	-0.114118	0.256068	0.423947	0.267986	0.250871	-0.0433965	0.174328	0.0685581	0.176638	0.299175	0.277778	0.650982	0.655409	0.580858	0.654821	0.666653	0.613619	0.646787
GRAMD1A	-0.520324	-0.557404	-0.375646	-0.289513	-0.618558	-0.597625	-0.696383	-0.336393	0.170061	0.164367	0.0890207	-0.370339	-0.419163	-0.180084	-0.109771	-0.0419959	-0.414631	-0.371925	-0.0826791	0.0280791	0.0815433	0.182008	0.279203	0.20193	0.348728	-0.422271	-0.247271	-0.20685	0.105603	-0.0089155	0.251865	0.434599	0.280357	0.29509	0.0394404	0.191916	0.119346	0.221209	0.352822	0.336736	0.561902	0.604278	0.530568	0.605945	0.622812	0.613275	0.634649
ABCG3	-0.486255	-0.544025	-0.32177	-0.262033	-0.634284	-0.612196	-0.670428	-0.423671	0.0241268	0.0256086	-0.0962108	-0.527359	-0.58652	-0.338522	-0.21018	-0.169681	-0.319439	-0.319857	0.0164386	0.0269645	0.093441	0.155205	0.377657	0.307567	0.498472	-0.359298	-0.2149	-0.206379	0.0716503	-0.102224	0.434678	0.544377	0.413175	0.407352	0.15033	0.234873	0.196672	0.270588	0.374854	0.328227	0.518424	0.547336	0.422492	0.681369	0.626813	0.61306	0.620385
CYTH3	-0.492327	-0.549159	-0.348068	-0.273347	-0.63736	-0.620598	-0.698189	-0.370761	0.123731	0.101131	-0.000529989	-0.455226	-0.519154	-0.273582	-0.172629	-0.11947	-0.350702	-0.328508	-0.0126748	0.0583179	0.119731	0.20212	0.363864	0.280321	0.448245	-0.420378	-0.265176	-0.233328	0.0591051	-0.0849681	0.347413	0.488302	0.345637	0.341315	0.0749376	0.209373	0.145877	0.234848	0.349821	0.316539	0.562527	0.587889	0.487544	0.657463	0.636026	0.612833	0.630034
CSGALNACT1	-0.533857	-0.550809	-0.336225	-0.276871	-0.586388	-0.546821	-0.618329	-0.434841	-0.0396886	0.0370895	-0.0609868	-0.461757	-0.480695	-0.243676	-0.136531	-0.0857138	-0.403275	-0.396853	-0.0853388	-0.0887289	-0.0312284	0.0351459	0.21806	0.18358	0.366094	-0.262124	-0.0937982	-0.105085	0.190881	0.0321611	0.371446	0.518965	0.382372	0.414734	0.19697	0.238214	0.222099	0.29861	0.42041	0.388875	0.442867	0.513699	0.406214	0.607543	0.580846	0.611653	0.611731
PGM5	-0.533213	-0.571768	-0.456281	-0.323003	-0.632348	-0.630189	-0.78836	-0.167597	0.490986	0.40102	0.386789	-0.149319	-0.217525	0.0146487	0.000765125	0.107209	-0.503189	-0.389992	-0.16312	0.139706	0.178084	0.342908	0.252772	0.12928	0.204227	-0.624863	-0.418762	-0.302648	0.0526579	0.0306977	-0.0169229	0.259672	0.0701612	0.0853853	-0.203616	0.110735	-0.0439281	0.10494	0.268141	0.292514	0.708281	0.734747	0.736548	0.53751	0.655742	0.611523	0.664812
FLT3	-0.510803	-0.546762	-0.336099	-0.272141	-0.607495	-0.578064	-0.649006	-0.411082	0.0219096	0.0550809	-0.0475319	-0.468312	-0.507749	-0.267324	-0.159151	-0.109498	-0.371471	-0.361257	-0.0457509	-0.0236215	0.0363031	0.106642	0.288542	0.233107	0.411615	-0.326183	-0.166581	-0.161125	0.129522	-0.0263759	0.372546	0.51121	0.374196	0.388759	0.150398	0.227606	0.193173	0.27282	0.389105	0.354717	0.490561	0.540072	0.432479	0.632432	0.602981	0.60955	0.616154
CSF2RB2	-0.450309	-0.526187	-0.261961	-0.231583	-0.642133	-0.617171	-0.631967	-0.517321	-0.142248	-0.125307	-0.29473	-0.688848	-0.754837	-0.499954	-0.311148	-0.299753	-0.221436	-0.268365	0.11453	0.013853	0.0931918	0.112617	0.4666	0.408473	0.645451	-0.277975	-0.165686	-0.194148	0.0460298	-0.190047	0.625304	0.658096	0.552506	0.528083	0.275362	0.280559	0.282488	0.325546	0.400905	0.322706	0.459492	0.4777	0.299526	0.75161	0.622077	0.608312	0.599472
TIFAB	-0.443337	-0.529133	-0.283819	-0.238623	-0.657569	-0.642518	-0.672802	-0.462029	-0.0272148	-0.0540382	-0.209875	-0.635027	-0.71639	-0.461108	-0.293688	-0.272601	-0.229701	-0.256194	0.112975	0.0755201	0.152229	0.190694	0.495327	0.414511	0.630997	-0.363787	-0.247316	-0.247545	0.00188001	-0.208803	0.556007	0.609367	0.494001	0.460887	0.188641	0.254438	0.225605	0.28275	0.363921	0.294863	0.522746	0.526277	0.367664	0.747368	0.643044	0.608124	0.610933
KLHL23	-0.483521	-0.55143	-0.386656	-0.286139	-0.652965	-0.651338	-0.757961	-0.271253	0.31809	0.229086	0.155958	-0.346111	-0.430875	-0.188043	-0.129127	-0.0575291	-0.37555	-0.31608	-0.0307491	0.150242	0.205165	0.321569	0.388243	0.270278	0.399207	-0.555476	-0.390337	-0.311424	-0.00193566	-0.0974303	0.211875	0.394096	0.234241	0.220245	-0.0730333	0.161822	0.0473331	0.161141	0.288283	0.273808	0.659675	0.665049	0.602906	0.633947	0.661788	0.607819	0.644549
PCP4L1	-0.541265	-0.570882	-0.461863	-0.32647	-0.619276	-0.614533	-0.778396	-0.15847	0.494543	0.416059	0.410868	-0.120447	-0.180797	0.0472535	0.0235926	0.134084	-0.52398	-0.405529	-0.18921	0.120935	0.156211	0.325129	0.215222	0.0972214	0.165424	-0.613036	-0.400991	-0.285066	0.0747785	0.0620193	-0.047334	0.241739	0.0499301	0.0733422	-0.207632	0.105735	-0.0484283	0.103102	0.271141	0.30117	0.697121	0.731488	0.741762	0.514223	0.644154	0.607632	0.661054
ADCY5	-0.568102	-0.575089	-0.470014	-0.334873	-0.593184	-0.578675	-0.749851	-0.165362	0.458494	0.422005	0.429782	-0.0848779	-0.122895	0.099281	0.0641158	0.1803	-0.570658	-0.448544	-0.245583	0.0564699	0.0868453	0.258255	0.126932	0.0287437	0.0925865	-0.558969	-0.333567	-0.228786	0.14118	0.136513	-0.0815737	0.228423	0.0335746	0.078195	-0.181125	0.107949	-0.0338205	0.119124	0.296933	0.335228	0.655308	0.713018	0.732685	0.473924	0.61909	0.607379	0.65672
DMXL2	-0.504458	-0.550663	-0.371353	-0.284324	-0.623833	-0.607832	-0.704634	-0.324338	0.194583	0.168499	0.0906099	-0.373845	-0.432177	-0.193241	-0.121749	-0.0556707	-0.394161	-0.350952	-0.0611495	0.0585722	0.11303	0.213705	0.312362	0.225978	0.370651	-0.44771	-0.278923	-0.23162	0.0750266	-0.0385212	0.254321	0.429793	0.277111	0.28287	0.0195447	0.186281	0.106401	0.208306	0.335647	0.317678	0.578902	0.610572	0.536295	0.61441	0.628281	0.607284	0.63126
PALMD	-0.497617	-0.539079	-0.311564	-0.259905	-0.607766	-0.57632	-0.629768	-0.450125	-0.0504128	-0.00718125	-0.128323	-0.531766	-0.57204	-0.329548	-0.19738	-0.159383	-0.334394	-0.3432	-0.0098649	-0.0346834	0.0300878	0.0829677	0.317443	0.268778	0.465843	-0.287275	-0.140035	-0.15093	0.124534	-0.056325	0.448336	0.556708	0.430232	0.438904	0.204503	0.246521	0.229889	0.296743	0.401735	0.354989	0.461839	0.508887	0.380078	0.657359	0.598116	0.606843	0.606365
PITPNM2	-0.464874	-0.533697	-0.312015	-0.253456	-0.63859	-0.621794	-0.674775	-0.415385	0.0397928	0.0199203	-0.107504	-0.540388	-0.610261	-0.362744	-0.229452	-0.192901	-0.289361	-0.292352	0.0466199	0.0594801	0.127701	0.186654	0.418846	0.339779	0.530841	-0.380625	-0.245664	-0.2321	0.0361272	-0.140311	0.448808	0.545015	0.417664	0.400755	0.136411	0.23101	0.187602	0.259255	0.356556	0.305888	0.531483	0.547829	0.419174	0.693223	0.630511	0.604217	0.613289
TGFB1	-0.457829	-0.530375	-0.299244	-0.247119	-0.640584	-0.622984	-0.66653	-0.436629	0.00249064	-0.013331	-0.15121	-0.576099	-0.647207	-0.398001	-0.251382	-0.221138	-0.268723	-0.281942	0.0674769	0.0556396	0.126699	0.176392	0.437571	0.361375	0.562754	-0.3622	-0.23399	-0.228761	0.0315345	-0.158713	0.490885	0.570516	0.448648	0.427939	0.164608	0.241386	0.206997	0.271925	0.363089	0.305517	0.518357	0.532716	0.392284	0.708846	0.62973	0.603792	0.609237
YIPF5	-0.434012	-0.519512	-0.254061	-0.224992	-0.648284	-0.627507	-0.637381	-0.514039	-0.132613	-0.132828	-0.308245	-0.704738	-0.779852	-0.52426	-0.329715	-0.321964	-0.196155	-0.246105	0.141208	0.0402935	0.121571	0.138105	0.503509	0.438002	0.676759	-0.29522	-0.190717	-0.215749	0.0167526	-0.223323	0.642304	0.662978	0.560529	0.526651	0.267023	0.279215	0.277524	0.318414	0.387915	0.305608	0.471037	0.478868	0.296042	0.765344	0.627453	0.603377	0.595678
BMP7	-0.44898	-0.526261	-0.285484	-0.240005	-0.643137	-0.62515	-0.65865	-0.457714	-0.0342464	-0.0477173	-0.196759	-0.613746	-0.687021	-0.436071	-0.275412	-0.251922	-0.245241	-0.269109	0.0912744	0.0544417	0.128558	0.168586	0.460202	0.386168	0.598132	-0.345276	-0.224702	-0.227553	0.0239039	-0.180687	0.535095	0.596719	0.480731	0.45522	0.192246	0.251706	0.226073	0.283971	0.368319	0.303356	0.506187	0.517479	0.364683	0.725942	0.629399	0.602775	0.604666
LAMB2	-0.569265	-0.565537	-0.435449	-0.321429	-0.570271	-0.543708	-0.69164	-0.23754	0.303832	0.321586	0.30945	-0.160857	-0.180501	0.0398751	0.0351945	0.13662	-0.548909	-0.455833	-0.234585	-0.0193769	0.0148574	0.158812	0.0976678	0.0285372	0.119932	-0.444923	-0.22874	-0.161576	0.191458	0.151667	0.0165589	0.293619	0.11402	0.167417	-0.0659028	0.141907	0.0413375	0.173791	0.341034	0.365693	0.569326	0.643504	0.635532	0.480261	0.588375	0.602294	0.635999
CNTLN	-0.50315	-0.554477	-0.414278	-0.300258	-0.63294	-0.629982	-0.759344	-0.222193	0.38794	0.30434	0.260042	-0.249451	-0.323219	-0.0887434	-0.0645727	0.022487	-0.433773	-0.350436	-0.0963139	0.136382	0.182653	0.319724	0.312658	0.195868	0.29849	-0.573903	-0.390796	-0.297363	0.0301866	-0.0301842	0.102576	0.327438	0.155809	0.15753	-0.127864	0.137173	0.00739429	0.135771	0.278721	0.282827	0.668908	0.686357	0.654775	0.578441	0.648327	0.602207	0.645481
MYL9	-0.507484	-0.558882	-0.441188	-0.311403	-0.636573	-0.639775	-0.789146	-0.165276	0.495036	0.383842	0.360379	-0.174215	-0.254068	-0.0222272	-0.0266192	0.0734763	-0.463978	-0.356923	-0.124255	0.172762	0.213829	0.372487	0.301997	0.170083	0.248348	-0.640688	-0.447051	-0.328405	0.0134458	-0.0155717	0.0114113	0.268023	0.0846234	0.0868639	-0.209139	0.109753	-0.0473402	0.09677	0.25039	0.268252	0.716887	0.729353	0.723381	0.554201	0.658407	0.601068	0.654979
LMOD1	-0.530617	-0.558981	-0.427813	-0.31079	-0.606499	-0.594988	-0.735907	-0.216601	0.374066	0.327135	0.300523	-0.196877	-0.249253	-0.0215919	-0.0152665	0.0802607	-0.487003	-0.394943	-0.159302	0.0787903	0.118917	0.262995	0.220563	0.120717	0.213535	-0.532847	-0.334175	-0.246701	0.0937668	0.048435	0.0480956	0.300712	0.123682	0.146987	-0.118409	0.13332	0.0103591	0.143401	0.298365	0.313805	0.636078	0.676064	0.659561	0.531667	0.624299	0.600937	0.64232
CSTF2	-0.439825	-0.513324	-0.226259	-0.215231	-0.626909	-0.594433	-0.585417	-0.578191	-0.270301	-0.218385	-0.409583	-0.766926	-0.823493	-0.569536	-0.349907	-0.354004	-0.184378	-0.258837	0.143392	-0.0332662	0.0508762	0.044281	0.46789	0.429767	0.692184	-0.191051	-0.092351	-0.151173	0.0688335	-0.200885	0.723474	0.718826	0.628746	0.605159	0.370013	0.309361	0.344624	0.368268	0.430232	0.337139	0.39304	0.418152	0.212425	0.767419	0.599479	0.600641	0.578978
I830077J02RIK	-0.470431	-0.526399	-0.281457	-0.242525	-0.615025	-0.585656	-0.618018	-0.484476	-0.109223	-0.0729621	-0.217507	-0.607659	-0.657572	-0.41202	-0.251537	-0.227933	-0.275813	-0.305422	0.0495206	-0.0197058	0.0516031	0.0853829	0.380692	0.331204	0.547781	-0.267804	-0.139413	-0.162398	0.0918988	-0.116596	0.536746	0.605175	0.491401	0.485453	0.24771	0.263451	0.260042	0.312902	0.401829	0.339429	0.446772	0.481604	0.328144	0.695183	0.599786	0.600637	0.594597
NPR1	-0.511199	-0.54771	-0.377334	-0.287491	-0.607573	-0.589249	-0.692877	-0.309969	0.203821	0.188445	0.121709	-0.337201	-0.387292	-0.15388	-0.0947504	-0.0238779	-0.416416	-0.366412	-0.0902796	0.0404908	0.0911206	0.196997	0.270513	0.189443	0.324925	-0.437189	-0.262159	-0.213779	0.097268	-0.00419413	0.215602	0.405478	0.250293	0.264768	0.0104452	0.178595	0.0979792	0.203214	0.335801	0.324726	0.567451	0.607103	0.543641	0.585696	0.613958	0.600578	0.625219
CLEC3B	-0.444362	-0.528	-0.317292	-0.251028	-0.652162	-0.645348	-0.703106	-0.37751	0.118968	0.0564804	-0.0678806	-0.520879	-0.608441	-0.36063	-0.235422	-0.196412	-0.270269	-0.263556	0.0702838	0.121553	0.189795	0.257567	0.469597	0.370009	0.549722	-0.448149	-0.318181	-0.284205	-0.0180984	-0.182281	0.42109	0.518404	0.3883	0.357354	0.0753168	0.213225	0.147757	0.225837	0.321024	0.272262	0.579559	0.57727	0.456581	0.701657	0.646767	0.598043	0.615273
GPR146	-0.572012	-0.553677	-0.384327	-0.301958	-0.540414	-0.496054	-0.608673	-0.34864	0.0718829	0.169335	0.125657	-0.28072	-0.274154	-0.0548638	-0.0120483	0.0669121	-0.514939	-0.466044	-0.214572	-0.130328	-0.0896187	0.0129471	0.0604657	0.0338123	0.168176	-0.277271	-0.0750656	-0.0641649	0.2641	0.169749	0.169403	0.395952	0.238933	0.304357	0.107799	0.194424	0.155313	0.257045	0.408269	0.411559	0.444286	0.542192	0.491174	0.495765	0.546608	0.597818	0.608125
CALHM2	-0.506721	-0.545473	-0.382085	-0.288189	-0.608027	-0.59262	-0.700631	-0.291165	0.237292	0.209582	0.147809	-0.317535	-0.371486	-0.139501	-0.0876684	-0.0140583	-0.417768	-0.361625	-0.0917587	0.0576149	0.106994	0.218211	0.275404	0.188322	0.316524	-0.459718	-0.284071	-0.227529	0.0848071	-0.00795624	0.191899	0.38759	0.230216	0.242487	-0.0157841	0.169491	0.0801559	0.18917	0.323034	0.315085	0.582543	0.618044	0.561281	0.579792	0.616117	0.596933	0.624928
ARRB2	-0.471997	-0.528405	-0.307865	-0.252736	-0.616656	-0.594091	-0.646877	-0.422925	0.0034951	0.0097701	-0.112826	-0.527686	-0.584304	-0.34247	-0.212076	-0.175203	-0.304602	-0.309544	0.0218369	0.0199489	0.0856583	0.141628	0.370294	0.304782	0.495178	-0.337406	-0.199048	-0.195435	0.0722477	-0.102942	0.440527	0.541027	0.415644	0.409676	0.161425	0.23369	0.201589	0.270502	0.369823	0.321771	0.495671	0.524521	0.39811	0.66789	0.608154	0.596664	0.601811
SULF1	-0.456876	-0.535375	-0.36538	-0.271782	-0.651111	-0.652893	-0.747113	-0.27869	0.297761	0.1966	0.111845	-0.380204	-0.473192	-0.231895	-0.159471	-0.0965013	-0.332849	-0.283884	0.00867771	0.17041	0.228299	0.334188	0.430089	0.308745	0.44449	-0.551681	-0.400637	-0.325176	-0.0324514	-0.139642	0.253119	0.410361	0.25932	0.2341	-0.0609539	0.165296	0.0550275	0.160731	0.27652	0.253763	0.652654	0.64689	0.573341	0.648604	0.657227	0.594565	0.629429
FADS1	-0.439225	-0.51777	-0.278202	-0.23468	-0.636215	-0.61901	-0.649571	-0.455074	-0.0388983	-0.0543099	-0.204296	-0.614863	-0.688925	-0.440793	-0.278866	-0.257414	-0.234189	-0.260084	0.098255	0.0574294	0.13142	0.168792	0.463735	0.389949	0.601323	-0.340373	-0.223855	-0.227596	0.0179233	-0.187167	0.538552	0.594402	0.481413	0.453985	0.193441	0.250097	0.225813	0.281398	0.362587	0.296544	0.499214	0.508286	0.354579	0.721652	0.622029	0.594104	0.59551
MYH11	-0.504409	-0.552762	-0.441141	-0.310216	-0.626102	-0.629359	-0.781181	-0.153438	0.504261	0.393914	0.375925	-0.154451	-0.232013	-0.00432676	-0.015082	0.0866714	-0.468283	-0.357926	-0.133643	0.170343	0.209405	0.370172	0.286787	0.155935	0.228266	-0.638743	-0.444333	-0.323822	0.0171972	-0.00486626	-0.00897315	0.252249	0.0688	0.0733361	-0.218424	0.103536	-0.0551666	0.0900638	0.244633	0.26564	0.711795	0.725643	0.72541	0.538236	0.648933	0.592911	0.647624
HAPLN1	-0.440724	-0.515599	-0.272547	-0.232665	-0.629274	-0.609326	-0.636494	-0.466936	-0.0675574	-0.0706163	-0.222693	-0.623831	-0.692969	-0.446016	-0.280133	-0.260758	-0.233716	-0.264159	0.0956081	0.0396546	0.11379	0.14668	0.451254	0.383992	0.599293	-0.316497	-0.200703	-0.211606	0.0314252	-0.178588	0.551472	0.603302	0.492835	0.468553	0.214483	0.255537	0.239161	0.291319	0.371345	0.30376	0.480716	0.494327	0.336966	0.718385	0.613882	0.59221	0.590676
ZFPM2	-0.491727	-0.541771	-0.392807	-0.288987	-0.618773	-0.612614	-0.729413	-0.247073	0.325564	0.258121	0.204202	-0.282638	-0.351636	-0.120333	-0.0822019	-0.00336796	-0.410719	-0.341007	-0.0809294	0.114474	0.16246	0.285961	0.311096	0.204467	0.317506	-0.528329	-0.353898	-0.275223	0.0389504	-0.036158	0.146681	0.351352	0.188939	0.19062	-0.0836958	0.148574	0.0353277	0.153268	0.288189	0.285305	0.631267	0.651206	0.607285	0.579341	0.630594	0.591367	0.628349
ACTN1	-0.433933	-0.524111	-0.33198	-0.254117	-0.656219	-0.657478	-0.727749	-0.32674	0.212751	0.115726	0.00471043	-0.468182	-0.566821	-0.321918	-0.216556	-0.169714	-0.275407	-0.251524	0.0662613	0.169633	0.234669	0.317651	0.484999	0.368266	0.528447	-0.512793	-0.38048	-0.32362	-0.0527029	-0.193311	0.356692	0.470739	0.33394	0.296787	0.00256355	0.188777	0.098735	0.18771	0.286919	0.246692	0.624079	0.610282	0.507785	0.688143	0.655563	0.590519	0.617168
TSPAN9	-0.528322	-0.549423	-0.418436	-0.305977	-0.587173	-0.57204	-0.709577	-0.223254	0.340483	0.311044	0.285652	-0.193994	-0.237857	-0.0156842	-0.00861578	0.084917	-0.487527	-0.399605	-0.169004	0.0527124	0.0914317	0.230399	0.191871	0.102004	0.195492	-0.49706	-0.299599	-0.220811	0.114343	0.0675425	0.0506982	0.300196	0.127241	0.156359	-0.0961809	0.135669	0.0227271	0.151415	0.304874	0.320432	0.604886	0.651842	0.634595	0.51365	0.60399	0.590121	0.627942
RCBTB2	-0.42062	-0.511994	-0.273118	-0.228784	-0.647474	-0.636531	-0.663785	-0.4444	-0.0108004	-0.0525942	-0.207937	-0.62705	-0.714166	-0.464431	-0.298567	-0.279828	-0.206853	-0.233286	0.12917	0.0973312	0.17339	0.210352	0.512044	0.42614	0.637149	-0.374044	-0.265574	-0.261168	-0.0224416	-0.228987	0.549507	0.594552	0.483418	0.443683	0.171494	0.245396	0.21229	0.267618	0.343131	0.273499	0.523408	0.518326	0.361692	0.739014	0.633172	0.5901	0.594556
LAMA5	-0.5179	-0.539315	-0.373805	-0.286618	-0.578785	-0.554345	-0.659653	-0.310773	0.172037	0.184881	0.126761	-0.311332	-0.345973	-0.120802	-0.0688575	0.00363335	-0.436426	-0.386161	-0.123019	-0.002894	0.043855	0.148235	0.209566	0.14337	0.274498	-0.391159	-0.211597	-0.172395	0.13826	0.0425297	0.193711	0.391668	0.238165	0.265796	0.0307496	0.177698	0.107789	0.211122	0.346798	0.340569	0.527469	0.581383	0.523984	0.549583	0.585405	0.588552	0.609631
LOC102638670	-0.56726	-0.539792	-0.345807	-0.285535	-0.515227	-0.459598	-0.547188	-0.419349	-0.0837262	0.0652877	0.000640454	-0.358909	-0.335295	-0.118924	-0.0444578	0.0184807	-0.485747	-0.467082	-0.197708	-0.202041	-0.157316	-0.0836493	0.0367099	0.0384206	0.200282	-0.163003	0.0274135	0.000687291	0.308662	0.178536	0.270863	0.460702	0.320551	0.392909	0.222636	0.227557	0.22983	0.309851	0.448529	0.437276	0.356587	0.468892	0.38934	0.501774	0.513343	0.588515	0.583101
NUDC	-0.423117	-0.510356	-0.274523	-0.229606	-0.640187	-0.628041	-0.657421	-0.440247	-0.0108672	-0.0470991	-0.198438	-0.614093	-0.697465	-0.450076	-0.288445	-0.268174	-0.215035	-0.239467	0.117853	0.0883067	0.162908	0.201249	0.494546	0.411484	0.619423	-0.36696	-0.256293	-0.25237	-0.0124226	-0.214937	0.536299	0.586227	0.474522	0.438465	0.17059	0.243059	0.21067	0.266796	0.344093	0.276892	0.516562	0.515036	0.362087	0.727462	0.62647	0.587049	0.591389
SSC5D	-0.463108	-0.529918	-0.361399	-0.270943	-0.629965	-0.626415	-0.720563	-0.284864	0.26462	0.187728	0.107789	-0.367156	-0.447717	-0.21201	-0.142667	-0.0793265	-0.347067	-0.299733	-0.0147929	0.133646	0.189074	0.292286	0.384136	0.275436	0.410165	-0.511389	-0.357215	-0.290878	0.00118297	-0.104406	0.244172	0.405593	0.256427	0.241469	-0.0383415	0.167346	0.0674832	0.170678	0.288346	0.2682	0.618989	0.624871	0.553761	0.623996	0.635746	0.586876	0.618143
LTBP3	-0.439125	-0.519499	-0.319109	-0.249893	-0.638827	-0.633061	-0.695637	-0.355624	0.142714	0.077167	-0.038281	-0.488179	-0.574036	-0.332066	-0.217749	-0.175555	-0.276753	-0.263534	0.0572305	0.124162	0.189349	0.26181	0.451218	0.350949	0.520403	-0.453504	-0.322172	-0.282917	-0.0172566	-0.169318	0.38611	0.491663	0.360639	0.332011	0.0540965	0.202004	0.131385	0.212311	0.309288	0.265758	0.578304	0.576477	0.465642	0.678848	0.635341	0.586395	0.605843
SERPINA3G	-0.44884	-0.508145	-0.257329	-0.227843	-0.601312	-0.571643	-0.590826	-0.499472	-0.155214	-0.114515	-0.268884	-0.638223	-0.688379	-0.447125	-0.273478	-0.258736	-0.241632	-0.283831	0.0753628	-0.0243587	0.0487663	0.0695456	0.394915	0.350537	0.574872	-0.236497	-0.120299	-0.153606	0.083616	-0.137412	0.577516	0.622501	0.518899	0.508188	0.278106	0.270063	0.278571	0.32124	0.39981	0.330048	0.417692	0.449059	0.284272	0.697146	0.582847	0.584201	0.573565
SMIM3	-0.426475	-0.508497	-0.274599	-0.230077	-0.631278	-0.617105	-0.647734	-0.439727	-0.0190842	-0.0461217	-0.194068	-0.60385	-0.682048	-0.437191	-0.278648	-0.257375	-0.223498	-0.247186	0.105568	0.0740578	0.147268	0.185786	0.473441	0.395082	0.601158	-0.353214	-0.240399	-0.239003	0.00170059	-0.198243	0.526854	0.580702	0.46903	0.437616	0.175784	0.242411	0.212977	0.268998	0.347867	0.282669	0.504717	0.508136	0.357804	0.715288	0.617807	0.583881	0.587271
C1RA	-0.526496	-0.532979	-0.35398	-0.280298	-0.55303	-0.51766	-0.610825	-0.356925	0.062414	0.124089	0.0585299	-0.344438	-0.359458	-0.138343	-0.0718501	-0.00670887	-0.438299	-0.404897	-0.136203	-0.0733102	-0.0261132	0.0617665	0.158638	0.117888	0.264053	-0.299406	-0.121362	-0.109674	0.193034	0.0787965	0.241463	0.425869	0.281273	0.321942	0.11172	0.198926	0.159318	0.250083	0.382262	0.370596	0.457078	0.529479	0.45855	0.536923	0.55516	0.583193	0.593017
BC030336	-0.564496	-0.542614	-0.387939	-0.300811	-0.523944	-0.481618	-0.601439	-0.316505	0.11019	0.200726	0.169491	-0.234745	-0.227004	-0.0153415	0.0119568	0.0956361	-0.523612	-0.464975	-0.231435	-0.122787	-0.0862196	0.0236229	0.0386002	0.00957025	0.129247	-0.289767	-0.0856205	-0.0660252	0.262117	0.185164	0.119506	0.357958	0.199178	0.266985	0.0745518	0.17809	0.130294	0.23659	0.39044	0.401096	0.446657	0.544133	0.507176	0.465764	0.532968	0.582458	0.596402
COL18A1	-0.41931	-0.502081	-0.257377	-0.221777	-0.626243	-0.609411	-0.628439	-0.467137	-0.0752026	-0.0895581	-0.248588	-0.642665	-0.718339	-0.473488	-0.29981	-0.286163	-0.202482	-0.239173	0.123516	0.0576147	0.133427	0.159721	0.481204	0.410461	0.628586	-0.317469	-0.212058	-0.223754	0.00674196	-0.209345	0.574852	0.60968	0.505446	0.472675	0.217233	0.255458	0.240394	0.287323	0.359182	0.286445	0.47737	0.482046	0.318262	0.725727	0.609288	0.580211	0.578018
CSRP1	-0.507909	-0.543191	-0.436916	-0.308377	-0.59881	-0.597035	-0.750196	-0.15167	0.478148	0.391488	0.381553	-0.129415	-0.193654	0.0258822	0.00818769	0.111246	-0.48407	-0.373276	-0.161746	0.133739	0.169158	0.328567	0.233256	0.115209	0.182754	-0.598649	-0.400959	-0.288047	0.0514964	0.0353727	-0.0303531	0.237509	0.055981	0.0717099	-0.202616	0.101455	-0.0482352	0.0951848	0.251994	0.277449	0.675935	0.701705	0.707418	0.504264	0.621932	0.579895	0.631647
TRAPPC2	-0.583376	-0.540684	-0.375857	-0.299684	-0.494659	-0.439547	-0.552454	-0.358152	0.00669482	0.153431	0.120786	-0.249566	-0.217303	-0.0104969	0.0246084	0.104611	-0.544201	-0.497923	-0.264031	-0.205259	-0.170029	-0.0725207	-0.0361483	-0.0369054	0.0939341	-0.19488	0.0136368	0.00645007	0.33285	0.243398	0.146535	0.382357	0.229287	0.315958	0.151449	0.196992	0.178653	0.275447	0.43054	0.439821	0.374453	0.496178	0.451438	0.441807	0.50039	0.579801	0.582986
CASP12	-0.500747	-0.533093	-0.388698	-0.288305	-0.586243	-0.57263	-0.691008	-0.250662	0.285098	0.251773	0.207153	-0.255473	-0.306192	-0.0839335	-0.0531806	0.0273067	-0.434331	-0.36497	-0.118806	0.062263	0.105974	0.227263	0.240312	0.151505	0.260551	-0.472985	-0.293127	-0.225974	0.0880374	0.0183982	0.124425	0.338043	0.177614	0.194813	-0.0570731	0.148863	0.0489302	0.164373	0.302911	0.305256	0.58399	0.620993	0.583215	0.539045	0.598144	0.578726	0.611222
TRIM3	-0.528437	-0.545213	-0.442426	-0.314421	-0.576031	-0.566315	-0.725034	-0.156877	0.447597	0.395329	0.395977	-0.100123	-0.146023	0.0681657	0.0411499	0.148577	-0.52081	-0.407317	-0.207208	0.0809409	0.112279	0.273307	0.160804	0.0591812	0.122999	-0.553117	-0.345066	-0.241509	0.105396	0.0959049	-0.0581543	0.22605	0.0425141	0.075461	-0.180537	0.10299	-0.036233	0.107971	0.272328	0.304445	0.640171	0.68487	0.698216	0.470163	0.599932	0.578191	0.62649
TLN1	-0.498598	-0.535671	-0.409129	-0.295679	-0.594431	-0.587938	-0.72131	-0.202066	0.381034	0.31621	0.286156	-0.200506	-0.260859	-0.0396471	-0.0301509	0.0599118	-0.449501	-0.361304	-0.130212	0.105666	0.146071	0.284656	0.24967	0.144287	0.234049	-0.539236	-0.353498	-0.26321	0.0604225	0.0150685	0.0560567	0.291529	0.122052	0.135287	-0.12976	0.125671	0.000617661	0.128739	0.274031	0.286044	0.632111	0.660151	0.641626	0.527135	0.611448	0.577625	0.619752
PPP1R18	-0.475842	-0.528374	-0.383666	-0.281359	-0.608417	-0.604358	-0.718354	-0.23667	0.329966	0.255674	0.202167	-0.27721	-0.348549	-0.121985	-0.0845837	-0.00779302	-0.395074	-0.326226	-0.0714704	0.124373	0.1717	0.293115	0.317383	0.20919	0.318791	-0.528424	-0.359721	-0.279626	0.0262231	-0.0465499	0.14335	0.341592	0.182867	0.181088	-0.0908099	0.143035	0.0288689	0.144685	0.275416	0.27207	0.625792	0.64116	0.598276	0.570593	0.620169	0.577181	0.61457
IFITM2	-0.386891	-0.495963	-0.264744	-0.217863	-0.654607	-0.653957	-0.678434	-0.414232	0.0450146	-0.0389831	-0.1972	-0.625733	-0.731718	-0.483834	-0.318369	-0.302289	-0.166787	-0.190555	0.169615	0.159941	0.237223	0.275777	0.574648	0.470085	0.67412	-0.426965	-0.330822	-0.311103	-0.0843823	-0.285835	0.545514	0.577846	0.469693	0.412312	0.125656	0.231031	0.181785	0.237891	0.30514	0.23302	0.557456	0.530725	0.375472	0.75022	0.641185	0.574775	0.585075
TNFAIP2	-0.399688	-0.49797	-0.269463	-0.222176	-0.642133	-0.63705	-0.665681	-0.415443	0.0315204	-0.0334265	-0.184718	-0.606065	-0.701607	-0.456678	-0.297709	-0.27848	-0.189968	-0.211176	0.141802	0.130483	0.205234	0.245699	0.532131	0.436503	0.637573	-0.403413	-0.300587	-0.28531	-0.0533536	-0.249828	0.525956	0.569314	0.459345	0.412084	0.135446	0.231079	0.186807	0.244108	0.316348	0.24865	0.53905	0.523258	0.373392	0.730009	0.629424	0.574448	0.583168
ABCA8B	-0.469192	-0.52839	-0.406169	-0.28841	-0.61642	-0.621614	-0.752987	-0.175424	0.447608	0.332955	0.296939	-0.210104	-0.294005	-0.0696781	-0.0579565	0.0298566	-0.40909	-0.317718	-0.0821688	0.180203	0.223466	0.365285	0.331622	0.202691	0.288264	-0.609494	-0.435201	-0.326614	-0.0111835	-0.0541931	0.0604875	0.283353	0.11457	0.106853	-0.180784	0.113694	-0.0312739	0.0993732	0.237159	0.245261	0.683464	0.686562	0.66704	0.554893	0.634327	0.572643	0.621844
CCL8	-0.415752	-0.486166	-0.203429	-0.199696	-0.59525	-0.561961	-0.544629	-0.574083	-0.302099	-0.241914	-0.432988	-0.762452	-0.814178	-0.5714	-0.350011	-0.359635	-0.161252	-0.242321	0.149712	-0.0456705	0.0366969	0.0211078	0.451665	0.421416	0.681518	-0.154358	-0.0653369	-0.131816	0.0710255	-0.199111	0.727928	0.709386	0.628843	0.605675	0.386081	0.305898	0.350844	0.366548	0.420662	0.326033	0.354211	0.379662	0.172812	0.741168	0.566374	0.571688	0.546625
ZC3H12B	-0.496741	-0.526698	-0.394855	-0.289202	-0.576109	-0.564602	-0.690441	-0.222193	0.324415	0.283043	0.249372	-0.215337	-0.266031	-0.0490387	-0.0322772	0.0530938	-0.444414	-0.365472	-0.133844	0.0718127	0.11212	0.241111	0.224337	0.131999	0.228222	-0.490054	-0.307389	-0.231202	0.0848168	0.0307407	0.079548	0.305364	0.14213	0.161052	-0.0895747	0.134598	0.0253482	0.145931	0.287711	0.296743	0.592028	0.628197	0.603053	0.516265	0.590731	0.568783	0.605074
N28178	-0.489423	-0.528709	-0.411289	-0.294089	-0.59	-0.586898	-0.724265	-0.178707	0.416466	0.338058	0.314026	-0.176027	-0.240274	-0.0225428	-0.0215915	0.0709142	-0.447528	-0.35295	-0.131034	0.124378	0.162991	0.306618	0.252991	0.141589	0.22219	-0.560672	-0.375701	-0.276757	0.0457435	0.0108375	0.0281012	0.268429	0.0978023	0.108452	-0.158916	0.114131	-0.0199329	0.111509	0.257118	0.27267	0.644232	0.66732	0.656718	0.515864	0.608851	0.568678	0.614322
TRAM1	-0.41575	-0.484888	-0.220866	-0.205992	-0.591509	-0.562611	-0.559852	-0.528566	-0.224382	-0.183087	-0.357217	-0.700925	-0.755824	-0.51735	-0.318626	-0.318744	-0.182563	-0.245942	0.126824	-0.0213501	0.0564137	0.056357	0.437277	0.397169	0.637441	-0.198693	-0.102635	-0.15094	0.0604581	-0.184681	0.655463	0.660237	0.572004	0.550049	0.325617	0.283664	0.309183	0.335943	0.397412	0.313669	0.383707	0.406079	0.219601	0.715875	0.567507	0.565549	0.548144
FAM105A	-0.448817	-0.494998	-0.270436	-0.231381	-0.569507	-0.540334	-0.57604	-0.446141	-0.0942419	-0.0533098	-0.181613	-0.546701	-0.588305	-0.360359	-0.218022	-0.192142	-0.276358	-0.299086	0.0260911	-0.0301584	0.0344069	0.0703742	0.330393	0.286968	0.484532	-0.247158	-0.121422	-0.141788	0.101627	-0.0861565	0.47796	0.553194	0.443795	0.444176	0.225677	0.242775	0.238409	0.290966	0.378765	0.324916	0.415022	0.453267	0.316428	0.63597	0.556602	0.562372	0.557376
SPRY4	-0.406086	-0.494849	-0.307991	-0.237248	-0.624625	-0.626091	-0.6877	-0.319325	0.186274	0.093425	-0.0176446	-0.463129	-0.558703	-0.325401	-0.218418	-0.177415	-0.248031	-0.230519	0.0765352	0.163274	0.226594	0.300656	0.474517	0.363921	0.520941	-0.480845	-0.359565	-0.308901	-0.0566069	-0.196993	0.360412	0.459186	0.332356	0.293906	0.0140876	0.183707	0.101837	0.18286	0.2733	0.231327	0.588015	0.572421	0.469034	0.662334	0.622611	0.559467	0.583268
GIPC3	-0.482859	-0.51091	-0.352785	-0.269588	-0.558709	-0.538938	-0.636852	-0.291757	0.177716	0.175087	0.115858	-0.306407	-0.347034	-0.131208	-0.0784905	-0.0113288	-0.399202	-0.352258	-0.0981711	0.0199027	0.0658776	0.164582	0.228931	0.159019	0.284593	-0.391221	-0.225018	-0.183509	0.108385	0.0152935	0.193932	0.375432	0.230441	0.249471	0.0186374	0.167511	0.0963689	0.194334	0.320078	0.311605	0.516162	0.559324	0.50209	0.535284	0.564768	0.559092	0.580706
P2RY12	-0.407334	-0.492067	-0.29397	-0.232045	-0.616899	-0.613354	-0.665112	-0.350915	0.121246	0.0507374	-0.0693087	-0.4973	-0.58559	-0.352341	-0.2319	-0.197161	-0.238802	-0.233687	0.0821905	0.132204	0.19741	0.259922	0.464499	0.36574	0.535008	-0.434199	-0.316701	-0.281806	-0.0361856	-0.192056	0.403741	0.488447	0.367821	0.332729	0.0629554	0.198674	0.134002	0.20648	0.292527	0.244509	0.553477	0.544559	0.428967	0.667385	0.611535	0.558828	0.576074
OLFR1034	-0.445041	-0.495422	-0.29056	-0.23813	-0.574747	-0.552898	-0.604175	-0.39368	0.00510694	0.0140297	-0.098247	-0.486218	-0.537149	-0.311498	-0.192175	-0.156343	-0.291828	-0.294796	0.0128867	0.0136803	0.0743974	0.128221	0.336626	0.276615	0.453109	-0.31365	-0.182109	-0.17858	0.0738979	-0.0875845	0.403906	0.501948	0.3836	0.380323	0.149655	0.217574	0.187395	0.252909	0.347522	0.304155	0.462145	0.491404	0.375425	0.6197	0.567242	0.558556	0.563503
ITGAX	-0.398835	-0.474224	-0.200425	-0.194278	-0.589488	-0.560781	-0.544801	-0.549851	-0.267989	-0.225738	-0.412915	-0.743394	-0.801372	-0.562971	-0.347807	-0.356861	-0.148486	-0.225072	0.158375	-0.0201572	0.060911	0.0482844	0.465243	0.427583	0.679113	-0.176829	-0.0921754	-0.149957	0.0473771	-0.213965	0.706837	0.687504	0.607924	0.579181	0.35677	0.29386	0.329924	0.34727	0.398904	0.306196	0.365522	0.382787	0.181983	0.731846	0.561981	0.558192	0.536547
EPN2	-0.498878	-0.503591	-0.308648	-0.255601	-0.521688	-0.480651	-0.548113	-0.402749	-0.0594439	0.0320143	-0.052401	-0.408202	-0.414518	-0.201198	-0.107379	-0.0591332	-0.387813	-0.381596	-0.102864	-0.113508	-0.0631408	-0.00273358	0.157437	0.13629	0.301922	-0.209332	-0.0502435	-0.0672681	0.206363	0.0637741	0.32747	0.469961	0.344747	0.384258	0.196729	0.219676	0.212448	0.28192	0.396908	0.371299	0.380906	0.456797	0.361837	0.535838	0.516753	0.557233	0.554754
GEM	-0.378185	-0.488735	-0.300949	-0.228869	-0.647552	-0.659153	-0.715105	-0.30586	0.230469	0.0943521	-0.0270199	-0.488979	-0.606562	-0.368858	-0.253692	-0.217291	-0.203767	-0.187784	0.128956	0.229053	0.296405	0.369624	0.55791	0.427032	0.585365	-0.537647	-0.429104	-0.365462	-0.123019	-0.267826	0.384008	0.464652	0.340349	0.281317	-0.0193663	0.178162	0.0820452	0.162717	0.244101	0.195466	0.630568	0.59169	0.481906	0.696493	0.645123	0.556917	0.585574
CHL1	-0.46287	-0.515709	-0.406256	-0.286028	-0.594649	-0.599982	-0.736588	-0.150471	0.467411	0.354403	0.329915	-0.168502	-0.24765	-0.03198	-0.0336808	0.0576694	-0.418298	-0.319907	-0.10194	0.175317	0.214371	0.360715	0.299819	0.173028	0.246108	-0.605804	-0.429816	-0.317208	-0.00339856	-0.0317456	0.017496	0.250177	0.0812102	0.0782974	-0.20056	0.100604	-0.047866	0.0852119	0.225053	0.239788	0.673132	0.679103	0.671684	0.521506	0.61467	0.555689	0.606616
AHI1	-0.45971	-0.510885	-0.383218	-0.276486	-0.588296	-0.587847	-0.707859	-0.197969	0.374478	0.287504	0.246545	-0.22849	-0.300903	-0.0840093	-0.0626264	0.0179672	-0.394964	-0.31639	-0.0819929	0.140334	0.183303	0.311401	0.302187	0.189638	0.282549	-0.544946	-0.377363	-0.286813	0.0148565	-0.0390388	0.0912692	0.29818	0.139299	0.13733	-0.130514	0.123337	-0.0011433	0.118537	0.249725	0.253479	0.628564	0.640179	0.612029	0.537683	0.60295	0.55509	0.596741
CPA6	-0.455295	-0.50795	-0.383228	-0.275382	-0.587194	-0.588197	-0.709115	-0.18995	0.386867	0.294068	0.254634	-0.221609	-0.296015	-0.0802605	-0.061252	0.0198441	-0.392233	-0.311805	-0.0801401	0.148575	0.191097	0.320606	0.306137	0.191039	0.281045	-0.553277	-0.386598	-0.292935	0.00769056	-0.0430572	0.0833565	0.290871	0.131892	0.128321	-0.140779	0.119392	-0.00832513	0.112256	0.243058	0.247657	0.633349	0.642507	0.616612	0.534932	0.60239	0.551628	0.594523
GPR65	-0.366747	-0.473666	-0.25459	-0.208201	-0.628776	-0.629951	-0.654454	-0.389131	0.0580749	-0.0299874	-0.180589	-0.594438	-0.698975	-0.461758	-0.305184	-0.289205	-0.156707	-0.177475	0.166012	0.164192	0.23808	0.276768	0.558471	0.45469	0.647666	-0.421039	-0.329762	-0.307056	-0.0902861	-0.280544	0.516058	0.547598	0.44348	0.386165	0.108684	0.217662	0.166391	0.221388	0.285514	0.217007	0.542319	0.513472	0.366611	0.719025	0.616478	0.548928	0.560325
GALNT2	-0.389	-0.464512	-0.200847	-0.191656	-0.579456	-0.553356	-0.541167	-0.526013	-0.237963	-0.205384	-0.385333	-0.714962	-0.774621	-0.54146	-0.335791	-0.342477	-0.147728	-0.218187	0.153686	-0.00747476	0.0711726	0.0629512	0.459825	0.418427	0.659967	-0.190535	-0.106633	-0.157256	0.0378894	-0.212136	0.675905	0.66174	0.58176	0.552111	0.330726	0.281834	0.310693	0.330705	0.382606	0.294025	0.370431	0.384529	0.19248	0.714241	0.553757	0.545894	0.527162
DNM1	-0.415322	-0.488009	-0.324843	-0.244503	-0.595346	-0.59531	-0.674494	-0.273653	0.23796	0.152971	0.0679584	-0.374345	-0.45826	-0.23645	-0.16019	-0.10719	-0.292428	-0.255729	0.0195663	0.146294	0.201179	0.290702	0.4005	0.293776	0.426254	-0.484411	-0.35033	-0.289298	-0.0267666	-0.135621	0.263388	0.395733	0.261652	0.237554	-0.0296296	0.160263	0.0680492	0.159404	0.261339	0.235589	0.582558	0.578007	0.501791	0.602953	0.598741	0.54418	0.572672
ARHGAP28	-0.36252	-0.468557	-0.248408	-0.204639	-0.622494	-0.622863	-0.644317	-0.393301	0.0429055	-0.0407568	-0.192902	-0.599466	-0.702309	-0.466931	-0.307807	-0.29382	-0.150758	-0.174639	0.168659	0.157992	0.231933	0.267249	0.555211	0.454385	0.64894	-0.408138	-0.319263	-0.300198	-0.0875174	-0.280373	0.524025	0.550741	0.449256	0.392281	0.118758	0.219392	0.172315	0.224604	0.286586	0.21677	0.530804	0.502777	0.353697	0.715839	0.609411	0.543903	0.553743
FLNC	-0.487223	-0.511724	-0.418669	-0.294738	-0.552189	-0.548206	-0.699039	-0.131976	0.458583	0.38708	0.387372	-0.0908898	-0.143998	0.0589543	0.0315817	0.13327	-0.478222	-0.367651	-0.179274	0.109083	0.139251	0.294466	0.182744	0.0762111	0.13239	-0.555629	-0.362898	-0.25562	0.0696918	0.0646997	-0.0619404	0.204207	0.0302585	0.0531631	-0.198136	0.0897682	-0.0519792	0.0865247	0.239609	0.269697	0.628488	0.660377	0.675054	0.451913	0.575702	0.543188	0.592541
TRPV2	-0.433044	-0.495848	-0.364018	-0.262989	-0.588813	-0.592577	-0.701383	-0.201808	0.363215	0.260401	0.20854	-0.25963	-0.341721	-0.1259	-0.0923304	-0.0196194	-0.352963	-0.28338	-0.0421582	0.165783	0.211667	0.330763	0.347571	0.22964	0.328146	-0.548679	-0.394771	-0.305423	-0.0194817	-0.0834888	0.128236	0.311707	0.160727	0.146679	-0.125006	0.125173	0.00241597	0.115159	0.235507	0.231526	0.627497	0.6267	0.58835	0.55342	0.601159	0.542763	0.583477
SLITRK6	-0.459884	-0.488356	-0.308565	-0.24683	-0.537407	-0.511612	-0.582055	-0.34909	0.0470431	0.0745561	-0.00823525	-0.387688	-0.421165	-0.209044	-0.123473	-0.0743802	-0.347066	-0.330058	-0.0581557	-0.0198054	0.0311189	0.100762	0.239562	0.188661	0.339212	-0.302384	-0.155073	-0.144148	0.12039	-0.00729996	0.297778	0.434222	0.308229	0.324655	0.112732	0.194301	0.157145	0.233086	0.341351	0.316317	0.444681	0.490823	0.404523	0.548732	0.53555	0.541791	0.550324
CKB	-0.411147	-0.493456	-0.373224	-0.262073	-0.611947	-0.628179	-0.743264	-0.158244	0.46285	0.305978	0.256533	-0.240886	-0.346064	-0.127544	-0.102618	-0.0266291	-0.33087	-0.249305	-0.0111711	0.244862	0.29148	0.422035	0.416245	0.271668	0.357843	-0.637218	-0.488579	-0.373479	-0.087972	-0.138462	0.0984263	0.283726	0.128236	0.0961436	-0.200363	0.105058	-0.0457944	0.0755649	0.19396	0.191735	0.692935	0.668627	0.638856	0.570927	0.627542	0.540498	0.59153
NTNG2	-0.463376	-0.495487	-0.354015	-0.264912	-0.54791	-0.534291	-0.638286	-0.249529	0.238173	0.211385	0.162651	-0.262983	-0.310471	-0.101941	-0.0640413	0.00676764	-0.392268	-0.334733	-0.0978424	0.0532	0.0958855	0.20256	0.234847	0.154661	0.263739	-0.426551	-0.263023	-0.206689	0.0811375	0.00646952	0.145246	0.333491	0.18754	0.201584	-0.0321365	0.146518	0.0601107	0.163112	0.288381	0.285889	0.534413	0.568322	0.524905	0.513154	0.557062	0.540024	0.567621
P4HB	-0.357855	-0.46012	-0.222824	-0.193528	-0.609647	-0.60344	-0.60776	-0.440334	-0.0565915	-0.110119	-0.277629	-0.6557	-0.749507	-0.514979	-0.333547	-0.330617	-0.127683	-0.171917	0.185207	0.116717	0.193922	0.210008	0.548676	0.464589	0.678159	-0.338418	-0.258307	-0.263065	-0.0641843	-0.281849	0.595336	0.596004	0.505692	0.45128	0.19255	0.241604	0.220654	0.258598	0.311571	0.231248	0.477838	0.457184	0.288066	0.725084	0.591106	0.539068	0.538908
EAR2	-0.371501	-0.455385	-0.189512	-0.183337	-0.581509	-0.558685	-0.539817	-0.526536	-0.239886	-0.220062	-0.406847	-0.734031	-0.80102	-0.568186	-0.355188	-0.366629	-0.12043	-0.195928	0.180363	0.0126419	0.0932163	0.0799747	0.492241	0.446023	0.690607	-0.197755	-0.122609	-0.172652	0.0128096	-0.243027	0.69799	0.669264	0.593911	0.555727	0.330429	0.282148	0.310609	0.326764	0.371831	0.278435	0.373574	0.378672	0.180544	0.725618	0.554519	0.538536	0.519754
X42624	-0.343526	-0.450222	-0.185111	-0.17601	-0.606692	-0.594968	-0.572121	-0.507911	-0.183954	-0.211775	-0.407576	-0.754879	-0.845464	-0.607913	-0.388807	-0.403793	-0.0775128	-0.152433	0.232492	0.0846076	0.169009	0.156958	0.578787	0.50993	0.753936	-0.263638	-0.200596	-0.234783	-0.057871	-0.315704	0.714891	0.670329	0.596339	0.536731	0.288322	0.274204	0.285249	0.302588	0.339344	0.240191	0.423113	0.403516	0.200879	0.760031	0.579849	0.536683	0.52395
ICAM1	-0.33677	-0.456131	-0.241684	-0.196161	-0.627505	-0.635601	-0.654756	-0.3708	0.0840892	-0.0311839	-0.185611	-0.598837	-0.715835	-0.481964	-0.322965	-0.311117	-0.120092	-0.142166	0.19941	0.204911	0.279784	0.316082	0.602342	0.487604	0.677004	-0.447305	-0.3679	-0.337501	-0.134153	-0.323342	0.521564	0.538354	0.439291	0.368998	0.0847875	0.208663	0.149661	0.202362	0.257961	0.186174	0.555806	0.51147	0.363279	0.724139	0.615035	0.53202	0.546175
KCNA1	-0.544863	-0.512255	-0.438488	-0.312807	-0.475801	-0.449499	-0.621779	-0.12768	0.393168	0.419259	0.458775	0.0246434	0.0265779	0.209449	0.144596	0.262505	-0.594124	-0.469116	-0.325356	-0.0426709	-0.0271288	0.137895	-0.0455879	-0.105139	-0.0690692	-0.429832	-0.204567	-0.119316	0.228708	0.254299	-0.175938	0.146954	-0.034555	0.0410388	-0.153966	0.0843465	-0.0321613	0.111924	0.289503	0.34408	0.525564	0.613485	0.65968	0.333139	0.503465	0.530053	0.571571
ACKR1	-0.436909	-0.493645	-0.401163	-0.27717	-0.576926	-0.588299	-0.728299	-0.108632	0.518376	0.382852	0.368002	-0.126939	-0.2122	-0.0062493	-0.0212945	0.0719031	-0.403916	-0.297226	-0.0979512	0.206321	0.241929	0.393476	0.304404	0.169109	0.225911	-0.632023	-0.461615	-0.33639	-0.031343	-0.0424125	-0.0268245	0.20794	0.0406582	0.0323133	-0.246014	0.0794754	-0.0815473	0.0542315	0.191211	0.210986	0.681966	0.678312	0.68352	0.494837	0.599499	0.529817	0.58574
CHRDL1	-0.488073	-0.50486	-0.440369	-0.302216	-0.533837	-0.533688	-0.705153	-0.0677196	0.554111	0.467162	0.49464	0.00606509	-0.045354	0.14763	0.0856646	0.201002	-0.514255	-0.379067	-0.223509	0.126186	0.148266	0.324221	0.138294	0.0240017	0.0503749	-0.598303	-0.3946	-0.265656	0.0703944	0.102834	-0.172217	0.128935	-0.0545721	-0.0249599	-0.274732	0.0577929	-0.106672	0.0461743	0.210263	0.257444	0.652343	0.685292	0.730945	0.40074	0.564219	0.527964	0.586549
PRKAR1A	-0.352189	-0.446352	-0.193931	-0.18049	-0.58557	-0.571149	-0.558017	-0.486499	-0.167033	-0.182328	-0.362704	-0.703816	-0.784023	-0.553844	-0.35209	-0.360299	-0.107488	-0.17253	0.193588	0.0629653	0.142152	0.137792	0.524103	0.461429	0.692341	-0.253011	-0.181491	-0.213114	-0.0299897	-0.270675	0.66045	0.635908	0.558201	0.509867	0.272703	0.262887	0.271724	0.29406	0.338033	0.248443	0.410329	0.400786	0.213362	0.721511	0.561532	0.527677	0.516296
RNF144B	-0.46835	-0.495834	-0.409349	-0.286245	-0.539885	-0.538817	-0.687542	-0.115815	0.470645	0.389173	0.3913	-0.0795222	-0.135816	0.0612403	0.0311615	0.131217	-0.461305	-0.350267	-0.169693	0.123264	0.152301	0.306369	0.189552	0.0801951	0.130674	-0.559913	-0.373414	-0.262837	0.0533435	0.053169	-0.0717838	0.18864	0.0183943	0.0371791	-0.211848	0.0813446	-0.0632308	0.073708	0.222422	0.252834	0.624869	0.650953	0.668517	0.439765	0.563724	0.525987	0.576501
NRG1	-0.336412	-0.444424	-0.200706	-0.179863	-0.601746	-0.5963	-0.5879	-0.454436	-0.0945723	-0.148741	-0.327026	-0.68909	-0.785783	-0.553854	-0.358739	-0.364446	-0.0920414	-0.148208	0.215218	0.119757	0.199354	0.203432	0.572612	0.490792	0.712469	-0.316805	-0.248956	-0.261888	-0.0790105	-0.309524	0.637665	0.614832	0.533813	0.47265	0.217805	0.248045	0.236508	0.265168	0.307852	0.219739	0.457323	0.430961	0.250085	0.733249	0.580119	0.525722	0.521835
NUCB2	-0.345059	-0.444761	-0.200785	-0.181533	-0.591015	-0.581503	-0.57388	-0.461417	-0.117294	-0.15374	-0.329003	-0.682138	-0.770088	-0.54042	-0.347113	-0.35198	-0.105821	-0.162781	0.197221	0.0930447	0.17123	0.174189	0.540947	0.467779	0.689776	-0.290659	-0.219114	-0.238363	-0.0534986	-0.283627	0.632759	0.614521	0.533644	0.480146	0.234492	0.250961	0.246428	0.274084	0.319209	0.232934	0.437079	0.419599	0.240023	0.719785	0.569195	0.524834	0.518501
TPM2	-0.445044	-0.492841	-0.414264	-0.283428	-0.563638	-0.574426	-0.726121	-0.0809338	0.555092	0.422329	0.423163	-0.0738122	-0.153067	0.0474028	0.0135286	0.114674	-0.43306	-0.313815	-0.132422	0.199027	0.229798	0.391943	0.263124	0.128721	0.170845	-0.640233	-0.461032	-0.328184	-0.0148773	-0.00671135	-0.0861958	0.170485	-0.00240762	-0.0024947	-0.27558	0.0654638	-0.103459	0.0396579	0.184479	0.214222	0.684614	0.687144	0.708968	0.462696	0.589696	0.524159	0.583501
LRRK1	-0.347413	-0.43442	-0.16851	-0.169077	-0.564544	-0.542837	-0.514288	-0.527562	-0.264793	-0.246229	-0.438044	-0.746636	-0.814823	-0.588381	-0.368583	-0.386631	-0.0897826	-0.17324	0.200989	0.0153726	0.0963415	0.0739137	0.502492	0.458745	0.705096	-0.177559	-0.11357	-0.168973	0.000339142	-0.260801	0.718274	0.671477	0.604864	0.561916	0.343731	0.281837	0.317025	0.325583	0.361642	0.263831	0.350798	0.351112	0.147432	0.71865	0.535636	0.517881	0.496569
CNN1	-0.450579	-0.489434	-0.426976	-0.288806	-0.547633	-0.558383	-0.722389	-0.0481284	0.597528	0.465597	0.48362	-0.0146685	-0.0882055	0.105463	0.0508159	0.160285	-0.461502	-0.328556	-0.167666	0.194242	0.219639	0.393122	0.220507	0.0863391	0.111645	-0.650658	-0.463039	-0.321202	-0.00046125	0.0292993	-0.15193	0.12744	-0.0509492	-0.042992	-0.310334	0.0488492	-0.129309	0.0215417	0.174085	0.21462	0.687565	0.695585	0.735829	0.426378	0.577526	0.515326	0.578635
SCGB3A1	-0.344078	-0.436294	-0.202832	-0.181277	-0.572079	-0.561633	-0.559425	-0.442284	-0.103855	-0.134706	-0.299254	-0.644906	-0.726778	-0.504207	-0.323066	-0.324193	-0.119502	-0.170093	0.17475	0.0825399	0.156877	0.164178	0.506306	0.43669	0.648253	-0.283413	-0.208565	-0.225454	-0.039965	-0.25737	0.594135	0.586776	0.504965	0.457668	0.220755	0.24083	0.234398	0.264541	0.312774	0.232829	0.425945	0.413353	0.244617	0.689666	0.552143	0.512516	0.50728
ABCE1	-0.297843	-0.419739	-0.180261	-0.162751	-0.595207	-0.597144	-0.579753	-0.437105	-0.0777235	-0.159886	-0.344193	-0.699362	-0.809226	-0.582643	-0.382234	-0.394562	-0.0439367	-0.104461	0.256892	0.162025	0.242898	0.241172	0.621613	0.52952	0.748623	-0.33635	-0.284486	-0.291666	-0.127989	-0.359779	0.651807	0.607375	0.534549	0.458435	0.199005	0.239278	0.222417	0.245998	0.276824	0.183619	0.463267	0.419474	0.234894	0.737072	0.572661	0.501922	0.499873
PLAU	-0.306081	-0.424541	-0.207363	-0.174732	-0.594574	-0.600933	-0.603916	-0.383335	0.0197575	-0.0824718	-0.24471	-0.621391	-0.733652	-0.510552	-0.339424	-0.338335	-0.0801597	-0.117295	0.221298	0.187072	0.26217	0.281591	0.597661	0.494086	0.689048	-0.392207	-0.328171	-0.312812	-0.133855	-0.334199	0.55873	0.548062	0.463462	0.391122	0.12487	0.213199	0.171975	0.210902	0.253487	0.174803	0.502895	0.457908	0.299441	0.707417	0.578392	0.500691	0.508246
ITGA5	-0.40268	-0.455867	-0.336133	-0.243171	-0.535205	-0.536866	-0.638533	-0.185376	0.328331	0.241683	0.19706	-0.229733	-0.300794	-0.103979	-0.076006	-0.00791406	-0.333614	-0.268576	-0.0502997	0.140193	0.181226	0.291421	0.301371	0.196751	0.28579	-0.494157	-0.350112	-0.269814	-0.00518388	-0.0616968	0.109118	0.282198	0.142837	0.134119	-0.111123	0.114734	0.00398647	0.108024	0.220576	0.21882	0.568503	0.572251	0.539419	0.499386	0.546863	0.497926	0.534695
SMOC1	-0.344104	-0.432247	-0.244467	-0.196217	-0.560738	-0.56053	-0.593575	-0.332062	0.081837	0.00712713	-0.115863	-0.494268	-0.582789	-0.371329	-0.245479	-0.223579	-0.171965	-0.179816	0.117414	0.138544	0.201467	0.246138	0.467445	0.375003	0.538247	-0.387324	-0.295314	-0.268889	-0.0629822	-0.219517	0.417404	0.466773	0.3666	0.32306	0.075874	0.186887	0.134234	0.190903	0.257008	0.203693	0.494268	0.475109	0.356054	0.625776	0.552592	0.496445	0.509478
ITGB1	-0.318272	-0.431914	-0.286376	-0.206813	-0.592708	-0.616126	-0.680349	-0.207088	0.336774	0.159005	0.063823	-0.380301	-0.505987	-0.295069	-0.214193	-0.173061	-0.176526	-0.141157	0.125763	0.284567	0.342154	0.426627	0.543854	0.399148	0.517173	-0.579593	-0.482932	-0.393479	-0.172758	-0.274487	0.270832	0.358898	0.239719	0.173069	-0.117969	0.127698	0.00662838	0.0925348	0.167984	0.133099	0.633708	0.577735	0.500134	0.617882	0.596333	0.489572	0.528459
ATP2B4	-0.416145	-0.463039	-0.409512	-0.273394	-0.531393	-0.547939	-0.706545	-0.0238587	0.616971	0.464297	0.482413	-0.00508227	-0.0866578	0.0984892	0.0425071	0.147905	-0.426128	-0.294095	-0.142819	0.224567	0.249094	0.419337	0.244637	0.103809	0.121734	-0.662101	-0.486933	-0.339397	-0.0354941	-0.000644247	-0.158488	0.107144	-0.0642842	-0.0660243	-0.332303	0.0362888	-0.146887	0.000485743	0.144081	0.183291	0.685431	0.680997	0.723314	0.413765	0.561354	0.487728	0.552982
CNTNAP5A	-0.318892	-0.40696	-0.163345	-0.159189	-0.537386	-0.521685	-0.498683	-0.475475	-0.206231	-0.20908	-0.386397	-0.687601	-0.759715	-0.546694	-0.345852	-0.360591	-0.0794146	-0.151702	0.196401	0.0437137	0.119448	0.104037	0.493096	0.441958	0.66683	-0.201508	-0.142361	-0.183647	-0.0238112	-0.26157	0.65599	0.61539	0.550435	0.504219	0.290486	0.25531	0.276685	0.288895	0.322962	0.232982	0.354716	0.346792	0.160795	0.677683	0.511899	0.484801	0.469134
LOC102632565	-0.283713	-0.394789	-0.164108	-0.151739	-0.55528	-0.553919	-0.533559	-0.427442	-0.106765	-0.170151	-0.346978	-0.672214	-0.770453	-0.557369	-0.363142	-0.377195	-0.0411647	-0.103696	0.239942	0.132655	0.209355	0.202553	0.573708	0.49413	0.706036	-0.290635	-0.242346	-0.257445	-0.10537	-0.330425	0.631771	0.585129	0.519102	0.450751	0.212734	0.232767	0.225975	0.244341	0.2722	0.182223	0.417007	0.380862	0.20196	0.69376	0.532549	0.472884	0.467537
FAM214A	-0.408336	-0.425347	-0.273146	-0.21805	-0.457506	-0.432469	-0.49813	-0.299074	0.0397709	0.0749987	0.00979803	-0.316201	-0.338281	-0.156622	-0.0893235	-0.0434551	-0.319961	-0.301484	-0.072502	-0.0352558	0.00669107	0.0701871	0.176621	0.137629	0.264139	-0.250834	-0.11746	-0.109129	0.125189	0.0205027	0.237022	0.365767	0.254252	0.275753	0.0982362	0.166358	0.135487	0.203464	0.301778	0.28432	0.376412	0.423827	0.35487	0.459581	0.456921	0.469584	0.476711
RASA3	-0.234855	-0.37302	-0.193061	-0.151188	-0.567425	-0.592348	-0.600259	-0.283496	0.156271	-0.0180519	-0.164005	-0.541928	-0.678986	-0.475035	-0.329559	-0.326528	-0.0264765	-0.0457297	0.256359	0.289484	0.358979	0.389791	0.650182	0.517278	0.676707	-0.480067	-0.434614	-0.384441	-0.229512	-0.393589	0.471768	0.456982	0.377163	0.282375	0.00642464	0.163446	0.0868622	0.13183	0.16369	0.0929224	0.544932	0.466804	0.333272	0.665852	0.556757	0.442525	0.463732
WNT5A	-0.254688	-0.365002	-0.208357	-0.159726	-0.521273	-0.538899	-0.56474	-0.24801	0.173098	0.0321768	-0.0837467	-0.444093	-0.556938	-0.368257	-0.255576	-0.239858	-0.088374	-0.0902211	0.174993	0.234072	0.293122	0.337043	0.531167	0.414851	0.550341	-0.444198	-0.381481	-0.330509	-0.163751	-0.296161	0.369264	0.393258	0.307089	0.237364	-0.0120873	0.144198	0.0679406	0.121184	0.167353	0.115116	0.508375	0.45376	0.348838	0.586441	0.515581	0.424312	0.446471
SYNPO2	-0.3606	-0.405669	-0.388242	-0.24963	-0.469687	-0.49402	-0.656214	0.0557002	0.682022	0.505385	0.545998	0.0878402	0.00489264	0.162774	0.0789255	0.186202	-0.399478	-0.25468	-0.149454	0.254792	0.270111	0.445391	0.214796	0.0691531	0.0534126	-0.671451	-0.508593	-0.345533	-0.0656766	0.00422599	-0.250631	0.0170028	-0.146259	-0.151202	-0.399807	-0.00516273	-0.202075	-0.0540888	0.0823313	0.132784	0.664474	0.649537	0.718079	0.333929	0.50391	0.420594	0.491872
IL1R1	-0.288321	-0.33923	-0.24392	-0.176559	-0.413627	-0.418652	-0.488186	-0.144734	0.246877	0.165799	0.122704	-0.201595	-0.264815	-0.11389	-0.0827731	-0.0365326	-0.222743	-0.1795	-0.00584578	0.130796	0.16479	0.242819	0.270772	0.185038	0.257819	-0.386443	-0.286561	-0.224895	-0.0335743	-0.0848823	0.112991	0.227604	0.126408	0.109455	-0.0833818	0.0893409	0.00455632	0.0794178	0.157401	0.149876	0.43923	0.431462	0.398197	0.398096	0.420849	0.373834	0.401717
ZFP423	-0.189294	-0.293737	-0.214103	-0.142722	-0.438528	-0.472734	-0.5292	-0.0716798	0.387199	0.186459	0.128542	-0.220609	-0.339351	-0.191583	-0.153446	-0.118251	-0.0968829	-0.051725	0.122905	0.309687	0.349155	0.426852	0.464154	0.325773	0.385187	-0.530747	-0.469584	-0.368336	-0.214809	-0.260076	0.127409	0.196459	0.106325	0.0362003	-0.199151	0.0548685	-0.0716515	0.00202501	0.0531785	0.0343273	0.532784	0.461478	0.424922	0.442711	0.446687	0.332362	0.375121
