# Supplementary material for: Integrative analysis of gut microbiota composition, host colonic gene expression and intraluminal metabolites in aging C57BL/6J mice
Source: Aging (Albany NY). 2018 May 16;10(5):930–50. doi: 10.18632/aging.101439 (PMC5990381; doi:10.18632/aging.101439)
Supplement: Data Set S4 [file aging-10-101439-s006.xlsx]

## Sheet: Sheet1
12vs28 months
Gene	Entrez ID	Limma (log2 based) Fold Change	IBMT p-value	IBMT q-value
Fabp6	16204	3.29326	1.58954e-05	0.00225417
Cml2	93673	2.32544	4.42407e-09	1.25478e-05
1700057G04Rik	78459	2.27504	0.000253994	0.01298
Creb3l3	208677	2.14425	2.62478e-06	0.000763542
Cml5	69049	1.9939	0.000101669	0.0079547
Cyp2c67	545288	1.89352	0.00383318	0.0501586
Pcdhb18	93889	1.87618	5.11187e-11	5.79942e-07
Snora44	100217418	1.87547	0.000105428	0.00802738
Pcdhb16	93887	1.85766	1.38304e-08	3.13812e-05
Abcg5	27409	1.79869	9.0972e-06	0.00169193
Gm6086	619597	1.78982	0.000568859	0.0191931
Abcc2	12780	1.77175	0.000360961	0.0153375
Snora73b	100306945	1.73431	5.47023e-06	0.00129291
Npc1l1	237636	1.69867	0.00251308	0.0411413
Abcg8	67470	1.69857	1.9005e-05	0.00249014
Plscr2	18828	1.68889	1.55106e-06	0.000606787
Cd36	12491	1.65438	0.000419525	0.0164044
Reg4	67709	1.63291	0.0045621	0.0546196
Catsperd	106757	1.61962	7.14855e-07	0.000405502
Cd209f	69142	1.61951	3.476e-05	0.00379185
Tfap2a	21418	1.57774	3.88348e-09	1.25478e-05
Rnf152	320311	1.57219	0.000456652	0.016986
Pcdhb19	93890	1.54599	6.76581e-07	0.00040399
Sfrp2	20319	1.54531	0.000484743	0.0174585
Ppy	19064	1.54233	0.00338259	0.0474923
Snora75	100303740	1.53888	0.00052308	0.0184442
Pcdhb17	93888	1.52752	9.49687e-07	0.000468444
Snora73a	100306944	1.52342	1.03705e-05	0.00173423
Rbm12b1	72397	1.51668	0.00686014	0.0672327
Slc28a3	114304	1.50781	0.00686782	0.0672327
Nat8	68396	1.50222	0.000187223	0.0111852
Pdx1	18609	1.49446	1.97267e-05	0.0025146
Chodl	246048	1.48472	0.00139781	0.0310945
Pcdhb21	93892	1.47783	5.476e-07	0.000365443
Fmo4	226564	1.47437	0.000388587	0.0157351
Itih2	16425	1.47213	0.00304209	0.0459551
Hoga1	67432	1.47197	5.7117e-06	0.00129599
Vsig2	57276	1.4515	3.25547e-07	0.000263809
Lrrk2	66725	1.43826	0.00288503	0.0441316
Vwf	22371	1.43392	6.40206e-06	0.00139676
Slc22a4	30805	1.43386	0.00380034	0.0500173
Pcdhb12	93883	1.43379	0.000214067	0.0120826
Cela1	109901	1.41629	0.000972875	0.0254315
Syn2	20965	1.41407	0.00405094	0.0514119
Ddo	70503	1.40754	0.00169108	0.0349216
Slc6a4	15567	1.40726	0.00203734	0.0374734
Upb1	103149	1.40696	0.000917345	0.024662
Col14a1	12818	1.40665	0.000216901	0.012134
Pcdhb20	93891	1.40393	5.43583e-06	0.00129291
Cytl1	231162	1.40372	3.92511e-05	0.00420098
Hexb	15212	1.40129	0.0088007	0.0766851
Ces2g	72361	1.4002	0.00015173	0.0100254
2010001E11Rik	72045	1.39964	0.000279456	0.0137248
Mir143	387161	1.39498	0.00574961	0.0620051
B3gnt7	227327	1.39191	0.00820797	0.0739967
Casq2	12373	1.39108	0.00147829	0.0321903
Sugct	192136	1.38825	0.000112335	0.00811747
Cdsn	386463	1.3853	1.97827e-07	0.000172642
Cd200r2	271375	1.38276	0.000544568	0.0187785
Rnu3a	19850	1.38274	0.00136236	0.0306666
St6galnac4	20448	1.37059	0.00359629	0.0487455
Gpr133	243277	1.36968	0.00538812	0.0597474
Snora74a	436583	1.36621	6.60276e-06	0.00141337
Tmem132c	208213	1.36505	0.00139451	0.0310945
Apob	238055	1.35142	0.000117925	0.00825837
Zc3h6	78751	1.3511	0.000387942	0.0157351
Slc6a12	14411	1.33662	0.00644038	0.0652959
Sfmbt2	353282	1.33148	2.73229e-05	0.00329765
Cox8b	12869	1.33046	0.00369753	0.0493954
4933411K16Rik	66765	1.33008	2.55142e-05	0.00311975
Fbln2	14115	1.32359	0.000188085	0.0111852
Pcolce2	76477	1.31946	0.00267044	0.0423794
C4b	12268	1.31686	5.98383e-05	0.00580227
Gata4	14463	1.31395	0.00056677	0.0191931
Lhfpl4	269788	1.31274	8.87554e-05	0.00745874
Cyp4v3	102294	1.31098	0.00118402	0.0284591
Maob	109731	1.30765	0.000356143	0.015247
Osbpl1a	64291	1.30623	5.65878e-06	0.00129599
Acpp	56318	1.30537	0.00721999	0.0687172
Eml1	68519	1.30456	0.000231241	0.0122754
Srd5a2	94224	1.30442	0.00343571	0.0477763
Plbd1	66857	1.3028	0.000442689	0.0168207
Lrrc31	320352	1.30047	0.00125099	0.029314
Pyroxd2	74580	1.2989	0.00207721	0.0378874
A630001G21Rik	319997	1.29753	0.00985951	0.0821864
Slit3	20564	1.29516	0.00748336	0.0702965
Dzip1	66573	1.29404	0.000189296	0.0111852
Lrrc39	109245	1.29243	0.000224283	0.0121746
Spag17	74362	1.29146	0.00131106	0.0298075
Tmeff1	230157	1.28827	0.000711657	0.0213028
Me3	109264	1.28467	0.00796234	0.0724401
Rnf180	71816	1.28222	0.00176178	0.0355015
Ms4a10	69826	1.28186	0.00676657	0.067033
Il1rn	16181	1.28004	0.00236406	0.0398238
Ankrd22	52024	1.27988	0.00101007	0.0260984
Ecm1	13601	1.27937	0.00835359	0.0746821
Ckmt2	76722	1.2791	0.00202305	0.0374194
Micu3	78506	1.27835	0.000336086	0.014665
Agmo	319660	1.27602	0.00470136	0.0555803
Gbp9	236573	1.27432	0.00229216	0.0394607
Gm10790	100038577	1.27133	0.0018973	0.0365422
Slfn5	327978	1.27043	0.00435244	0.053427
Arhgef9	236915	1.26894	0.00273309	0.0429258
Cyp2j9	74519	1.26792	0.00330928	0.0469989
Itm2a	16431	1.26724	0.00561062	0.0609143
Itih5	209378	1.26669	0.00397503	0.0511301
Crebrf	77128	1.26665	0.00125921	0.029314
Ptpru	19273	1.26621	0.00552868	0.060485
Pax9	18511	1.26575	0.000285967	0.0138055
Gnpda2	67980	1.2649	1.07004e-05	0.00173423
Clec14a	66864	1.2647	0.000426222	0.0165034
Cirbp	12696	1.26368	7.34104e-05	0.00655781
Slc2a5	56485	1.26307	0.00310934	0.0462932
Tmem117	320709	1.26257	1.53506e-06	0.000606787
Dll1	13388	1.26216	0.00390435	0.0507387
Acer2	230379	1.26166	5.18476e-05	0.00515975
Bco2	170752	1.2605	0.000242356	0.0126125
Prkacb	18749	1.2602	0.00995006	0.0825172
6230400D17Rik	76133	1.25866	0.00269594	0.0426576
Ttll3	101100	1.25813	9.52425e-05	0.0076511
Zfp791	244556	1.2572	0.000435754	0.0167015
Hspa2	15512	1.25708	0.00729951	0.0693576
Tenc1	209039	1.25548	8.24678e-06	0.00165537
Ar	11835	1.2554	0.00936098	0.0793725
Nlrp10	244202	1.25509	0.001106	0.0273368
Plat	18791	1.25334	0.00403162	0.0514119
Dnajb7	57755	1.25194	0.00490879	0.0566096
Trdmt1	13434	1.25165	0.00467965	0.0554762
Card6	239319	1.25056	1.64317e-05	0.00230146
Esrrg	26381	1.25001	0.00476544	0.0557858
Itgae	16407	1.24962	0.0012931	0.0296368
Bnipl	171388	1.24949	0.00215959	0.038523
Mia2	338320	1.24816	0.000114713	0.00813387
Ptpn13	19249	1.24666	0.0032137	0.0466233
Naaladl2	635702	1.24577	2.5574e-05	0.00311975
Snhg11	319317	1.24558	0.00980589	0.0819691
Slc5a6	330064	1.245	0.00699004	0.067773
Gsn	227753	1.244	0.00041499	0.0164016
Creb3	12913	1.24319	9.71692e-06	0.00172248
Hdgfrp3	29877	1.24186	0.00356511	0.0485983
Nrbp2	223649	1.24099	0.00126136	0.029314
Oas1c	114643	1.23957	0.00405587	0.0514119
Pou6f1	19009	1.23896	0.000533609	0.0186271
Ghr	14600	1.2386	0.000454798	0.0169726
Ccdc122	108811	1.23675	0.00126402	0.029314
Mill2	243864	1.23376	0.00548569	0.0603412
Chp2	70261	1.2319	0.00146207	0.0319505
Rnf32	56874	1.23144	0.00699609	0.067773
Rassf9	237504	1.23128	0.00582459	0.0625871
Smyd3	69726	1.23105	5.69329e-05	0.00561656
Siglec1	20612	1.23105	0.000206677	0.0118422
Gjb3	14620	1.22983	0.00211175	0.0380985
Setd7	73251	1.22971	0.00275438	0.0431014
Klhdc7a	242721	1.2284	0.000721878	0.0215519
Tmc3	233424	1.22693	0.0064022	0.0650833
Rsg1	76166	1.22573	0.00101449	0.0260984
Hdac11	232232	1.22485	0.00130168	0.0297134
Cd300lg	52685	1.22447	0.00932228	0.0793409
Kcnk10	72258	1.22348	0.000897154	0.0242917
Nipa1	233280	1.22225	0.00224262	0.0391572
Esam	69524	1.22186	0.00905994	0.0779767
Tmem237	381259	1.22183	0.000486528	0.0174673
Pik3ip1	216505	1.22153	0.00828808	0.0743847
Ace	11421	1.2211	0.00370084	0.0493954
Fbxo32	67731	1.21849	0.00667241	0.0665694
Flot2	14252	1.21827	0.00776231	0.0716064
Krt23	94179	1.21811	0.000263328	0.0132135
Soat2	223920	1.21799	0.00105143	0.0267547
Vstm5	69137	1.21773	0.00180529	0.0357391
Snora16a	100310813	1.21624	1.04563e-05	0.00173423
Abcc6	27421	1.21597	0.00453517	0.0545038
Themis3	74556	1.21505	0.00855567	0.0756314
Bcas3	192197	1.21387	2.38653e-05	0.00299038
Igf2	16002	1.21246	0.00115412	0.0279771
K230010J24Rik	432964	1.21241	0.000217118	0.012134
Ptgr1	67103	1.21208	0.00161691	0.0338447
Aldh1a3	56847	1.21116	0.00787876	0.0720843
Pam	18484	1.21106	0.00346935	0.0478659
Ifi27	52668	1.21069	0.00103758	0.0265121
Cryz	12972	1.21029	1.18712e-05	0.00181998
Rpgrip1	77945	1.21022	0.00592005	0.0628939
Tmem71	213068	1.20977	0.00847232	0.0752142
A330023F24Rik	320977	1.20897	0.00879663	0.0766851
Slc24a5	317750	1.20863	0.00583801	0.0626014
Trpm6	225997	1.2086	0.00963388	0.0809004
Enpp6	320981	1.20652	0.00246996	0.0409556
Casd1	213819	1.205	0.00405916	0.0514119
Hacl1	56794	1.20454	0.000360575	0.0153375
Hnmt	140483	1.20441	0.00707652	0.0682128
Nmnat3	74080	1.20276	0.00153301	0.0328152
Pter	19212	1.20265	0.00415009	0.0520252
Capn2	12334	1.20197	0.000446425	0.0168207
Fam69b	56279	1.20086	0.000537478	0.0186489
Olfr959	258501	1.20077	0.0091531	0.0783207
Cdc14b	218294	1.2006	0.000293664	0.0138242
AA415398	433752	1.20051	0.00900271	0.0777441
Eps8l1	67425	1.19976	0.00346254	0.0478472
P2rx7	18439	1.19958	0.000998497	0.0259816
Cmtm4	97487	1.19932	0.00120916	0.0288811
Parp3	235587	1.19924	0.000161057	0.0103231
Ispd	75847	1.19909	0.00179687	0.0356989
Tnik	665113	1.19863	3.73479e-05	0.00403536
Lrrc40	67144	1.19832	0.00101261	0.0260984
Fam126a	84652	1.19814	0.00730989	0.0693981
Macc1	238455	1.19801	0.00869437	0.076345
Gas2	14453	1.19763	0.000694125	0.0211394
Cd46	17221	1.19591	0.00583621	0.0626014
Lrrc8e	72267	1.19501	0.00713986	0.0682408
Dak	225913	1.19456	0.000578584	0.0191931
Lyrm9	66274	1.19448	0.00305484	0.0460255
Prkra	23992	1.19435	0.000105119	0.00802738
1810062G17Rik	72282	1.19379	0.00819549	0.0739681
Ube2e2	218793	1.19336	7.77633e-06	0.00160405
Hpn	15451	1.19242	0.00706307	0.0681962
Arhgap18	73910	1.19228	0.000220577	0.0121746
Acvr1c	269275	1.19227	0.00250296	0.0410348
Tdrd12	71981	1.19202	0.00285314	0.0439245
Ccdc82	66396	1.1902	0.00030807	0.0142656
Mctp1	78771	1.18887	0.00787499	0.0720843
Pxylp1	235534	1.18852	0.00635872	0.0649901
Plac8l1	69401	1.18833	0.000770348	0.022055
Dnajc28	246738	1.18734	0.00604099	0.0632275
Phyhd1	227696	1.18727	0.00374319	0.0497999
Tatdn3	68972	1.18695	0.00490822	0.0566096
Acss2	60525	1.18597	0.00187157	0.0362956
Malat1	72289	1.18494	0.00670399	0.0666581
Tmem106b	71900	1.18468	8.85269e-06	0.0016739
Pm20d1	212933	1.18422	0.00592011	0.0628939
Rac3	170758	1.18406	0.000585259	0.0193042
Zfp558	72230	1.18353	0.00675891	0.0670279
Irx2	16372	1.18321	0.00621948	0.0640291
Dmrta2	242620	1.18238	0.00100917	0.0260984
Trpm7	58800	1.18175	6.47615e-05	0.00617411
Galnt15	78754	1.18115	0.00821961	0.0739967
Uvssa	71101	1.18114	0.00105349	0.0267547
Fggy	75578	1.18092	0.000101352	0.0079547
Vav1	22324	1.18056	0.00619734	0.0638675
Kiz	228730	1.17975	0.00333093	0.0471284
Herc3	73998	1.17957	0.000609389	0.0196967
Dcp1b	319618	1.17928	0.00308752	0.0462109
Mbd5	109241	1.17845	0.0011807	0.0284397
Neu1	18010	1.17793	0.00330924	0.0469989
Ccser1	232035	1.17746	0.000797171	0.0224415
Xkr4	497097	1.17742	0.00407986	0.0515435
4921506M07Rik	70846	1.17735	0.00210023	0.0380985
Efhc1	71877	1.17712	0.00790175	0.0722364
Grik5	14809	1.17602	0.00246484	0.0409556
Adh7	11529	1.17572	0.00992798	0.0824546
Dennd1a	227801	1.17547	0.000316518	0.0143636
Adssl1	11565	1.17453	0.00377395	0.0499598
Aldoc	11676	1.1744	0.00336211	0.0473829
Rnf149	67702	1.17434	0.00318635	0.04653
Fgl1	234199	1.17413	0.00105415	0.0267547
Rcan2	53901	1.17388	0.00685911	0.0672327
D830013O20Rik	380765	1.17383	0.00330516	0.0469989
Pgm2	72157	1.17363	0.00472128	0.0555861
Emp2	13731	1.17337	0.00235056	0.0397967
Gm1976	100038746	1.17272	0.00603902	0.0632275
Pink1	68943	1.17265	0.00247647	0.0409556
Aaed1	66129	1.17252	9.15986e-05	0.0075853
Zfp677	210503	1.17248	0.00511608	0.0580377
Plekhh1	211945	1.17236	0.00822476	0.0739967
Eif2s2	67204	1.17176	0.0060251	0.0632275
F8	14069	1.1717	0.00767086	0.071216
Pcmtd2	245867	1.17013	0.00453125	0.0545038
Rhbdl1	214951	1.16939	0.00347233	0.0478659
Spata13	219140	1.16885	0.00393748	0.05082
Fam132a	67389	1.16866	0.00453339	0.0545038
Tef	21685	1.16837	0.00367497	0.0493954
Reps2	194590	1.16824	0.00809402	0.0732271
Gpam	14732	1.16816	0.000562423	0.0191039
Phldb2	208177	1.16794	0.00422141	0.0523326
Cbx7	52609	1.16638	0.00269043	0.0426298
P4htm	74443	1.16562	0.00312721	0.0464375
Scaper	244891	1.16474	0.00317671	0.04653
Zfp280c	208968	1.16463	0.000109532	0.00810921
Sephs2	20768	1.16405	0.000577557	0.0191931
Lamb3	16780	1.16374	0.00202928	0.0374345
Uap1l1	227620	1.16307	0.000113348	0.00813387
Il1rap	16180	1.16274	0.00279434	0.0434867
Jade2	76901	1.16266	0.00510223	0.0579428
Nefh	380684	1.16231	0.00480334	0.055834
Slc1a3	20512	1.16227	0.00321939	0.0466463
Firre	103012	1.16211	0.00146188	0.0319505
1700001L05Rik	69291	1.16203	0.000779406	0.0221613
Mir221	723827	1.1618	0.00539379	0.0597474
Pde8b	218461	1.16174	0.00628428	0.0643458
Siae	22619	1.16173	0.000478047	0.0174078
4833420G17Rik	67392	1.16151	0.000377705	0.015644
Cbr4	234309	1.16147	0.000284556	0.0137961
Hexdc	238023	1.16145	0.00804777	0.0728667
Fzd6	14368	1.16085	0.00488828	0.0565893
Gria4	14802	1.15875	0.00611442	0.0635801
Galc	14420	1.15865	0.00197735	0.0372768
Usp28	235323	1.15848	0.00443617	0.0538288
Tarsl2	272396	1.15731	0.00193298	0.036977
Gm10560	100038526	1.15722	0.00581583	0.0625871
Lrch1	380916	1.15716	0.00291476	0.044453
Vaultrc5	378472	1.15668	0.00313866	0.0464454
Tfdp2	211586	1.15655	3.11607e-05	0.00350018
Sorbs2	234214	1.15635	0.00631229	0.0645744
Fam76a	230789	1.15623	0.00265753	0.042307
Them4	75778	1.15613	0.000744447	0.0218237
Cc2d2a	231214	1.1558	0.00666989	0.0665694
Zfp532	328977	1.15576	0.00364815	0.0491232
Slc30a2	230810	1.15528	0.00754638	0.070406
Chmp1b	67064	1.15518	0.00361628	0.0488668
5730455P16Rik	70591	1.15364	0.00296534	0.0449156
Etaa1	68145	1.15355	0.00617586	0.0638116
Ccdc32	269336	1.15315	0.000548664	0.0188054
Eif3e	16341	1.15296	0.00285402	0.0439245
Pdk2	18604	1.15285	0.00716032	0.0683101
Dqx1	93838	1.15235	0.00313637	0.0464454
Myof	226101	1.15222	0.0097926	0.08193
LOC102635638	102635638	1.152	0.0068355	0.0672327
Atp5s	68055	1.1515	8.06346e-05	0.00698948
Ebpl	68177	1.15149	0.00123015	0.0291553
B630005N14Rik	101148	1.15147	0.00964575	0.0809402
Lama5	16776	1.1513	0.00837087	0.0747188
D930015E06Rik	229473	1.15106	0.000658024	0.020397
Thra	21833	1.1503	0.0017094	0.0350496
Smg6	103677	1.14991	0.00106422	0.0268302
Txnrd3	232223	1.14961	0.00422879	0.0523326
Espn	56226	1.14936	0.00344133	0.0477763
Ppp6r2	71474	1.14839	0.000787023	0.0222663
Sycn	68416	1.14826	0.000459523	0.0170369
Dync2h1	110350	1.14808	0.00335238	0.0473634
Cpq	54381	1.14786	0.000591918	0.0194647
Gramd1b	235283	1.14781	0.00853079	0.0756108
Acadsb	66885	1.14776	0.00120921	0.0288811
Inpp5k	19062	1.14772	0.000352504	0.0152059
Usp20	74270	1.14768	7.11403e-05	0.00642062
Osbpl5	79196	1.14746	0.000319793	0.0144544
2210408I21Rik	72371	1.1471	0.00390913	0.0507426
Nfix	18032	1.14637	0.000219765	0.0121746
Myo9a	270163	1.14596	0.000159826	0.0103024
Cfb	14962	1.14569	0.000945234	0.0250553
Rfesd	218341	1.14557	0.00770553	0.0713627
Ugt2b35	243085	1.14547	0.000639702	0.0202721
Inpp5f	101490	1.14543	0.00584393	0.0626057
Epb4.1l1	13821	1.14442	0.00986077	0.0821864
Acap2	78618	1.14434	0.00337743	0.0474923
Glud1	14661	1.14417	0.000573096	0.0191931
Wdsub1	72137	1.14279	0.00183834	0.0358696
Bbs4	102774	1.14275	0.00324577	0.0468489
AU021092	239691	1.14268	0.00741206	0.0699001
Ift46	76568	1.1411	0.00048007	0.0174078
Pdk1	228026	1.1408	0.00272695	0.0429258
Fam208a	218850	1.1399	0.00015891	0.0103019
Yipf4	67864	1.13985	0.000205781	0.0118422
Klhl5	71778	1.13764	0.00656376	0.0660159
Tmem245	242474	1.13752	0.00013618	0.00923854
Sema3c	20348	1.13655	0.00246603	0.0409556
Bckdhb	12040	1.13641	0.00393296	0.0508194
Ppm1a	19042	1.13577	0.000374534	0.0156216
Usp3	235441	1.13565	4.03412e-05	0.0042773
Rmrp	19782	1.13561	0.00145945	0.0319505
Arv1	68865	1.13541	0.00438237	0.0535754
Scai	320271	1.13482	0.00202517	0.0374194
Tbc1d22a	223754	1.1342	0.00155448	0.0330253
Cadps2	320405	1.13388	0.00218503	0.0387331
Scml4	268297	1.13374	0.00918678	0.0785411
Zfp788	67607	1.13372	0.00734732	0.0694684
Bach1	12013	1.13318	4.68556e-06	0.00118128
Cops2	12848	1.13296	7.90509e-05	0.00695219
Caap1	67770	1.13284	0.00737523	0.0696686
Alox8	11688	1.13273	0.00667693	0.0665694
Bckdha	12039	1.13247	0.00953198	0.0803545
Tdrd3	219249	1.13238	0.000706359	0.0212097
Camk1d	227541	1.13207	0.000447762	0.0168207
Ppp3r1	19058	1.13119	0.000930545	0.024753
Sdccag8	76816	1.13113	0.00403617	0.0514119
Pard3b	72823	1.13085	0.000888569	0.024158
Csde1	229663	1.13073	0.000315903	0.0143636
Ifih1	71586	1.13069	0.000948128	0.0250735
Tk2	57813	1.13044	0.00611002	0.0635801
Msi2	76626	1.13039	0.000316512	0.0143636
Zkscan17	268417	1.13011	0.00875982	0.0766704
Tmem128	66309	1.12993	0.00410319	0.051723
Fus	233908	1.12936	0.00381148	0.0501058
Slc17a5	235504	1.1291	0.00466535	0.0553796
Cryzl1	66609	1.12896	0.000928158	0.024753
Manba	110173	1.12894	0.00154586	0.032904
Kat2b	18519	1.12867	0.00100809	0.0260984
Epc1	13831	1.12819	0.000790453	0.0223077
Snora7a	100217451	1.128	0.00262401	0.0419878
Ofd1	237222	1.12765	0.000570705	0.0191931
Malt1	240354	1.12733	0.00317647	0.04653
Zfp655	72611	1.12702	0.000184448	0.0111852
Clmn	94040	1.12702	0.00199352	0.0373209
2410002F23Rik	668661	1.12607	0.000734021	0.0216802
Fam129b	227737	1.12571	0.00125195	0.029314
Zfp654	72020	1.12516	0.00675285	0.0670264
Cep70	68121	1.12511	0.00691393	0.0673611
Styxl1	76571	1.12503	0.00509041	0.0578665
Serinc5	218442	1.12491	0.00613896	0.0635801
Dcxr	67880	1.12478	0.00211565	0.0380985
Ccdc90b	66365	1.12462	0.00592265	0.0628939
Parn	74108	1.12439	0.00153054	0.0328152
Lrba	80877	1.1243	8.485e-05	0.00723778
Zfp704	170753	1.12394	0.00375084	0.0497999
Pacs1	107975	1.12356	0.00257887	0.0415586
Kat6b	54169	1.12356	0.0065334	0.0658273
Epb4.1l3	13823	1.12328	0.000970971	0.0254315
Gpr56	14766	1.12315	0.00613881	0.0635801
Mocs1	56738	1.123	0.0021554	0.0385086
Eif4b	75705	1.1229	0.000313677	0.0143636
Tlr1	21897	1.12208	0.00113122	0.0275994
Avl9	78937	1.12163	0.00173716	0.0353191
Gsdmd	69146	1.12151	0.00402975	0.0514119
Srpk2	20817	1.1215	0.00915157	0.0783207
Grsf1	231413	1.12145	0.00177778	0.0355447
Anapc7	56317	1.12093	0.00406038	0.0514119
Ccdc84	382073	1.1208	0.00784619	0.072077
Naprt	223646	1.12051	0.00355744	0.048567
Paxbp1	67367	1.12046	0.00165602	0.034536
Qdpr	110391	1.11983	0.00333113	0.0471284
Tspan12	269831	1.11971	0.00392274	0.0507539
Exoc7	53413	1.11963	0.00472322	0.0555861
Pttg1ip	108705	1.1196	0.0015586	0.0330512
Maoa	17161	1.11946	0.000236358	0.012472
Tbk1	56480	1.11926	0.00196679	0.0371887
Enpp5	83965	1.11863	0.00200816	0.0374098
Bivm	246229	1.11848	0.00645341	0.065336
Mpg	268395	1.11812	0.00841308	0.0749748
Smad5	17129	1.11782	0.000859232	0.0235459
Sec22a	317717	1.11782	0.0065083	0.065691
Slc25a20	57279	1.11768	0.000468235	0.0172472
Inpp4a	269180	1.11693	0.00594628	0.0629424
Farp1	223254	1.11677	0.00518913	0.0584034
Mbtd1	103537	1.11659	0.00288567	0.0441316
Mtap7d3	320923	1.11629	0.00944389	0.0798368
Zcchc7	319885	1.11624	0.00146445	0.0319505
Cyp39a1	56050	1.1161	0.00715773	0.0683101
Itfg2	101142	1.11609	0.000510138	0.0181427
Spopl	76857	1.11595	0.00411585	0.051825
Anxa7	11750	1.1157	0.00248906	0.0409808
Ccndbp1	17151	1.11556	0.00152663	0.0328022
Sumf1	58911	1.11534	0.000890088	0.024158
Asah2	54447	1.11506	0.00193603	0.036977
Gls	14660	1.11428	0.00592627	0.0628939
Atg7	74244	1.11304	0.000323592	0.0145097
Ppp3ca	19055	1.11277	0.000143337	0.00956565
Fam76b	72826	1.11277	0.00111916	0.0275199
Tmem30b	238257	1.11271	0.000310345	0.0143125
Xrn2	24128	1.1122	0.0068541	0.0672327
Prcp	72461	1.11164	0.00612967	0.0635801
Rbfox2	93686	1.111	0.00368106	0.0493954
Itgb4	192897	1.11089	9.32271e-05	0.00760908
Pcf11	74737	1.11071	0.00831546	0.0745173
Pcca	110821	1.1106	0.000773723	0.022055
Cfap97	66756	1.11014	0.00915409	0.0783207
Uimc1	20184	1.10982	0.00512082	0.0580377
Clcn2	12724	1.10934	0.0027863	0.0434808
Akr1c14	105387	1.10916	0.00392342	0.0507539
Rasa2	114713	1.10869	0.00935812	0.0793725
Eps15	13858	1.10863	0.00319516	0.04653
Rpl26	19941	1.10847	0.00123097	0.0291553
Crot	74114	1.10841	0.00734791	0.0694684
A230046K03Rik	319277	1.10834	0.00185018	0.036004
Zfp386	56220	1.1083	0.00759784	0.0707546
Gas6	14456	1.10803	0.000922951	0.024753
Chd1l	68058	1.10783	0.00866692	0.0761629
Usp22	216825	1.1067	0.000561365	0.0191039
Impact	16210	1.10663	0.00418397	0.0521617
Ulk2	29869	1.1066	0.00374481	0.0497999
Dcaf11	28199	1.10608	0.00481952	0.0559647
Mcoln1	94178	1.10598	0.00512843	0.0580659
Fam126b	213056	1.10594	0.00113747	0.0276923
Car2	12349	1.10583	0.00549493	0.0603412
Adprhl2	100206	1.1058	0.00328798	0.0469989
Ppcdc	66812	1.10575	0.00933518	0.0793725
Zfp280d	235469	1.10538	0.0069707	0.0677078
Dpp4	13482	1.1052	0.00793038	0.0722811
Arid4a	238247	1.10511	0.00907754	0.0779904
Wasl	73178	1.10487	0.000691811	0.0211394
Ddx46	212880	1.10443	0.00178585	0.0355447
Usp30	100756	1.1041	0.001187	0.0284704
Ubr3	68795	1.10408	0.000481803	0.0174078
Lnpep	240028	1.10392	0.000695019	0.0211394
Nagk	56174	1.10362	0.00228782	0.0394607
Vti1a	53611	1.10345	0.00126609	0.029314
Pik3c3	225326	1.10343	0.00801689	0.0727614
Gab2	14389	1.10317	0.00142485	0.0315722
Rbmx	19655	1.10308	0.00663534	0.0664999
Rp9	55934	1.10304	0.00327071	0.0469105
Fbxo8	50753	1.10277	0.00415528	0.0520327
Hectd3	76608	1.10241	0.00637522	0.0649901
Crim1	50766	1.10206	0.00879468	0.0766851
Dpy19l4	381510	1.10199	0.00833642	0.0746463
Slc44a2	68682	1.10173	0.0043541	0.053427
Fech	14151	1.10155	0.00141601	0.0314376
AW549877	106064	1.10151	0.00412953	0.0518659
Ddx10	77591	1.1014	0.00743974	0.0700908
Rictor	78757	1.10123	0.00350997	0.0480926
Thsd4	207596	1.10087	0.00773605	0.0715285
Ikbkg	16151	1.10036	0.00169606	0.0349216
Kdm4c	76804	1.10031	0.000663173	0.0205006
Rab33b	19338	1.10025	0.0033885	0.0474923
Wwp2	66894	1.09998	0.00897656	0.0776805
Slx1b	75764	1.09954	0.00877818	0.0766704
Tor4a	227612	1.09952	0.00428001	0.0528365
Ahnak	66395	1.09925	0.00668334	0.0665694
Exoc2	66482	1.09909	0.00272803	0.0429258
Dennd6a	211922	1.09842	0.00255021	0.0413317
Polr3a	218832	1.09824	0.00255436	0.0413398
Plbd2	71772	1.09798	0.00465434	0.0553796
Dsg2	13511	1.09779	0.00540333	0.0597474
Tnks1bp1	228140	1.09737	0.00258301	0.0415664
Ago1	236511	1.09725	0.00514606	0.0582075
Brwd1	93871	1.09698	0.00537158	0.0597474
Mysm1	320713	1.09691	0.00296394	0.0449156
Vps8	209018	1.0969	0.00841938	0.0749748
Fubp3	320267	1.09648	0.00339081	0.0474923
Usb1	101985	1.09632	0.00175681	0.0355015
Arfgap3	66251	1.09586	0.00753556	0.070406
Zdhhc20	75965	1.09547	0.00128351	0.0295363
Wdr41	218460	1.0953	0.00112984	0.0275994
Grtp1	66790	1.09511	0.000247452	0.0127606
Nek7	59125	1.09496	0.00530747	0.0593235
Fuca2	66848	1.09479	0.00231673	0.0395819
Zfp687	78266	1.09404	0.00451184	0.0545038
Rpph1	85029	1.09399	0.0039957	0.0512662
Wsb2	59043	1.09397	0.00792036	0.0722811
Gaa	14387	1.09392	0.00326732	0.0469105
Gpr128	239853	1.09386	0.00325394	0.0469071
Stx12	100226	1.09236	0.00231877	0.0395819
Zfyve26	211978	1.09234	0.00394855	0.0508927
Bmpr2	12168	1.09203	0.00835359	0.0746821
Zcchc4	78796	1.09175	0.0071905	0.0684939
Slc19a1	20509	1.09169	0.00974331	0.0816381
Phka2	110094	1.09164	0.00647348	0.0654246
Uri1	19777	1.091	0.00483955	0.0560825
Dip2c	208440	1.08973	0.00893045	0.077518
Nae1	234664	1.08948	0.00404908	0.0514119
Ppip5k2	227399	1.08936	0.000770117	0.022055
Mapk9	26420	1.08916	0.0010912	0.027093
Polr3c	74414	1.08905	0.0070905	0.0682128
Slu7	193116	1.0885	0.00560881	0.0609143
Dctn2	69654	1.08812	0.000335629	0.014665
Zmynd11	66505	1.08719	0.00189875	0.0365422
Tmem45b	235135	1.08719	0.00353753	0.0484117
Ccser2	72972	1.08713	0.00175666	0.0355015
Tspan3	56434	1.087	0.00842637	0.0749782
Tlk1	228012	1.08699	0.00462577	0.0551254
Serpinb6a	20719	1.08622	0.00226444	0.0392215
C77080	97130	1.08597	0.00091735	0.024662
Vps41	218035	1.08556	0.00109136	0.027093
Flot1	14251	1.08531	0.00959866	0.0807242
Aplp2	11804	1.08383	0.00210414	0.0380985
Lonp2	66887	1.08357	0.00345016	0.0477763
Ctage5	217615	1.08355	0.00234186	0.0397967
Csnk1g1	214897	1.0835	0.0068451	0.0672327
Cask	12361	1.08337	0.00315307	0.0465171
Btrc	12234	1.0832	0.00625336	0.0641645
Tatdn2	381801	1.08292	0.00984698	0.0821864
Plcg1	18803	1.08238	0.00855175	0.0756314
Comt	12846	1.08227	0.00793492	0.0722811
Sbf2	319934	1.08151	0.00478061	0.0557858
Akap7	432442	1.0806	0.006715	0.066709
Taf15	70439	1.08034	0.00904289	0.077898
Snora52	100217419	1.07997	0.00310782	0.0462932
Zswim8	268721	1.07996	0.0045737	0.0546196
Ugt2b34	100727	1.07936	0.00908112	0.0779904
Ash2l	23808	1.07935	0.00407921	0.0515435
Herpud2	80517	1.07918	0.00901132	0.0777441
Mllt10	17354	1.07909	0.00180822	0.0357391
Scap	235623	1.07866	0.00357084	0.0485983
Wwp1	107568	1.07704	0.00212647	0.0382087
Scaf11	72193	1.07662	0.00239252	0.0401071
Rab24	19336	1.07662	0.00760245	0.0707546
Letmd1	68614	1.07644	0.00731697	0.0694073
Hgsnat	52120	1.07623	0.00379327	0.0500173
Azi2	27215	1.07619	0.000841822	0.0231947
Arid2	77044	1.07545	0.00626124	0.0641678
Trappc8	75964	1.07523	0.00882668	0.0767516
9130011E15Rik	71617	1.07479	0.0092891	0.0791178
Slk	20874	1.07433	0.00896366	0.0776281
Snapc3	77634	1.07402	0.0082941	0.0743847
Depdc5	277854	1.07362	0.00876637	0.0766704
Sltm	66660	1.07357	0.00562821	0.0610193
Anxa11	11744	1.07344	0.00224744	0.0391572
Furin	18550	1.07245	0.0022388	0.0391572
Eif3f	66085	1.06977	0.00232014	0.0395819
Myo6	17920	1.06915	0.00349166	0.0479575
Amz2	13929	1.0685	0.00598314	0.0630425
Plcb3	18797	1.06788	0.00457336	0.0546196
Osbpl9	100273	1.06307	0.00524751	0.0588853
Ctnna1	12385	1.06155	0.00357876	0.048624
Ppp6r3	52036	1.05855	0.00614224	0.0635801
Hnrnpul1	232989	1.05666	0.00956722	0.0805194
Abi1	11308	1.05654	0.00358668	0.0486733
Rps5	20103	1.05245	0.0033017	0.0469989
Anapc1	17222	-1.05404	0.00711869	0.0682331
Sdccag3	68112	-1.0563	0.00525824	0.0588892
Ep400	75560	-1.0601	0.00493849	0.0566745
Celf1	13046	-1.06014	0.00690067	0.0673415
Hspa8	15481	-1.06331	0.00498644	0.05697
Adrbk1	110355	-1.06355	0.00826346	0.0742273
Cox8a	12868	-1.06585	0.00364462	0.0491232
Anks1	224650	-1.06624	0.00937014	0.0793908
Prkcsh	19089	-1.06666	0.00589467	0.0628939
Larp1	73158	-1.06668	0.00678379	0.067033
Poldip3	73826	-1.06811	0.00418109	0.0521617
Rpf1	70285	-1.07105	0.00734513	0.0694684
Kdelr2	66913	-1.07255	0.00375309	0.0497999
Eme2	193838	-1.07257	0.00716518	0.0683101
Ssr4	20832	-1.0738	0.00699815	0.067773
Ybx3	56449	-1.07508	0.00139723	0.0310945
Napa	108124	-1.07539	0.00491212	0.0566096
Tmed7	66676	-1.07611	0.000263595	0.0132135
Setd1a	233904	-1.07693	0.00127946	0.0295031
Syngr2	20973	-1.07704	0.0013078	0.0297931
Tmbim4	68212	-1.07707	0.000471773	0.0172654
Tsta3	22122	-1.07712	0.00585743	0.0626424
Capns1	12336	-1.07715	0.00793849	0.0722811
Efcab14	230648	-1.07814	0.00179989	0.0356989
Gtf2h3	209357	-1.07857	0.00753871	0.070406
Slc35c2	228875	-1.07864	0.00592581	0.0628939
Dynlrb1	67068	-1.07901	0.00182781	0.0358696
Tmem214	68796	-1.08016	0.002786	0.0434808
Emc4	68032	-1.08093	0.000604034	0.0196367
Emc7	73024	-1.08096	0.00508971	0.0578665
Atp6v0a2	21871	-1.08182	0.00922227	0.0787259
Txn2	56551	-1.08211	0.000931645	0.024753
Vprbp	321006	-1.0826	0.00666453	0.0665694
Faah	14073	-1.08289	0.00900872	0.0777441
Hnrnpm	76936	-1.08315	0.00314412	0.0464454
Timmdc1	76916	-1.08342	0.0049094	0.0566096
Rab25	53868	-1.08363	0.00187663	0.0363317
Ufsp2	192169	-1.08364	0.0085833	0.0757213
Brd3	67382	-1.08379	0.0081806	0.0738925
Atp2a2	11938	-1.084	0.00311446	0.0463088
Ube2k	53323	-1.08613	0.00391427	0.0507513
Psmb1	19170	-1.08641	0.00239335	0.0401071
Pfn1	18643	-1.08684	0.00150746	0.0325756
Stt3a	16430	-1.08697	0.0010666	0.0268305
Sdhd	66925	-1.08781	0.00781497	0.0718778
Misp	78906	-1.08815	0.00910797	0.0781619
Prdx2	21672	-1.08823	0.00151514	0.0326329
Hist1h4d	319156	-1.08863	0.00378968	0.0500173
Polr2f	69833	-1.08891	0.00382876	0.0501586
Traf6	22034	-1.08936	0.00953346	0.0803545
Eif4e2	26987	-1.08937	0.000782877	0.0222044
Snrnp27	66618	-1.08949	0.00894822	0.0775536
Tecr	106529	-1.08973	0.00399074	0.0512662
Srpk1	20815	-1.09012	0.0023808	0.0400151
Mvb12a	73711	-1.09018	0.00314062	0.0464454
Taf6	21343	-1.09063	0.0012501	0.029314
Atg13	51897	-1.09074	0.00412833	0.0518659
Atg3	67841	-1.09125	0.00470313	0.0555803
U2af1l4	233073	-1.09146	0.00308722	0.0462109
Eif4g1	208643	-1.09148	0.00551022	0.0603412
Nqo2	18105	-1.09155	0.00863175	0.0760435
Hdlbp	110611	-1.09172	0.000169248	0.0106084
Ehd1	13660	-1.09206	0.00707899	0.0682128
Lypla2	26394	-1.09251	0.00775863	0.0716064
Cnpy3	72029	-1.09292	0.000754334	0.0220419
Slc38a2	67760	-1.09295	0.00210992	0.0380985
Tfg	21787	-1.0932	0.00345071	0.0477763
Snap23	20619	-1.09329	0.00624901	0.0641645
Rnf181	66510	-1.09344	0.00249617	0.0409827
Txnl4a	27366	-1.09346	0.000698304	0.0211825
Dalrd3	67789	-1.09358	0.00542567	0.059936
Dennd2d	72121	-1.09369	0.00787502	0.0720843
Neurl4	216860	-1.09393	0.00369223	0.0493954
Nlrp6	101613	-1.09469	0.00387264	0.0505002
Nxf1	53319	-1.09481	0.000771344	0.022055
Slc35c1	228368	-1.09571	0.00194272	0.03701
Dctn5	59288	-1.0964	0.000838042	0.0231947
Gcn1l1	231659	-1.09655	0.00798629	0.0725998
Slc35a1	24060	-1.09671	0.00713261	0.0682408
Ddx39b	53817	-1.09687	0.00476127	0.0557858
Zfp511	69752	-1.0969	0.00846274	0.0752142
D2Wsu81e	227695	-1.09698	0.00863323	0.0760435
Mrpl17	27397	-1.09763	0.00882863	0.0767516
Cpsf6	432508	-1.09763	0.00595642	0.0629782
Lman2	66890	-1.09784	0.000480902	0.0174078
Pura	19290	-1.09792	0.00370058	0.0493954
Naa38	78304	-1.09849	0.000823768	0.0229699
Diablo	66593	-1.09992	0.00546583	0.0602038
Bspry	192120	-1.10016	0.0019548	0.0371478
Rint1	72772	-1.10044	0.00946408	0.0799479
Bola1	69168	-1.10057	0.00563208	0.0610193
Fibp	58249	-1.10073	0.00532934	0.0594882
Isg20	57444	-1.10114	0.00942711	0.0797544
Scamp3	24045	-1.10123	0.00247607	0.0409556
Pcbp1	23983	-1.10139	0.00308681	0.0462109
Psmc3	19182	-1.10148	0.00202398	0.0374194
Tbc1d22b	381085	-1.10173	0.00306672	0.0460821
Cul2	71745	-1.10178	0.00732379	0.0694139
Timm10b	14356	-1.10186	0.00466312	0.0553796
Fcgbp	215384	-1.10193	0.00150059	0.0324889
Ubap2	68926	-1.10213	0.00178142	0.0355447
Ece2	107522	-1.10221	0.00902716	0.0778215
Hsf1	15499	-1.10222	0.00599012	0.0630425
Ext1	14042	-1.10241	0.00911833	0.0781916
Polg	18975	-1.10253	0.00899229	0.0777441
Pdia5	72599	-1.10261	0.00713968	0.0682408
Eef1b2	55949	-1.10323	0.00323592	0.0467662
Fam192a	102122	-1.10325	0.00190038	0.0365422
Sfxn2	94279	-1.10328	0.00690331	0.0673415
Mrps2	118451	-1.10334	0.00781817	0.0718778
Ftsj1	54632	-1.10335	0.00320294	0.04653
Stim2	116873	-1.10342	0.00447189	0.054087
Hn1l	52009	-1.10348	0.00471544	0.0555861
Tysnd1	71767	-1.10367	0.00935919	0.0793725
Cox5b	12859	-1.1039	0.00473699	0.0556903
Ddx41	72935	-1.10469	0.00400166	0.0512662
Cpsf3	54451	-1.10473	0.00288635	0.0441316
Arfip2	76932	-1.10516	0.00373924	0.0497999
Hist1h2bc	68024	-1.10516	0.00424606	0.0524744
Sil1	81500	-1.10521	0.00640993	0.0651036
Kbtbd7	211255	-1.10524	0.00986671	0.0821864
Elp5	54351	-1.10609	0.000371573	0.0155553
Mdh2	17448	-1.10628	0.00291521	0.044453
Ssu72	68991	-1.1063	0.00695758	0.0676383
Magt1	67075	-1.10672	0.000354456	0.0152322
Gbf1	107338	-1.10703	4.95355e-05	0.00501768
Guca2a	14915	-1.10742	0.00192486	0.0369501
Mrpl39	27393	-1.10766	0.000656316	0.020397
Mea1	17256	-1.10815	0.000158884	0.0103019
Kdm5c	20591	-1.10836	0.000123319	0.00854439
Snx12	55988	-1.10883	0.00169537	0.0349216
Mbd3	17192	-1.109	0.00404296	0.0514119
Nploc4	217365	-1.10933	0.000683118	0.0210026
Ndufb8	67264	-1.10933	0.00201853	0.0374194
Mterf3	66410	-1.10953	0.00219533	0.038855
Pglyrp2	57757	-1.10999	0.00949161	0.0801208
Ormdl2	66844	-1.11001	0.00355211	0.0485526
Gm14719	100041697	-1.11026	0.00495988	0.0567809
Cpsf4	54188	-1.11028	0.00454075	0.054513
Bcs1l	66821	-1.11028	0.00257011	0.041507
Msrb1	27361	-1.11052	0.000599773	0.0196367
Pdlim1	54132	-1.11063	0.000735732	0.0216802
Mrpl10	107732	-1.11071	0.00400369	0.0512662
Mrpl40	18100	-1.11072	0.0078785	0.0720843
Eif2b4	13667	-1.11076	0.00799513	0.072622
Slirp	380773	-1.11091	0.00429839	0.0530057
Gfer	11692	-1.11123	0.00217325	0.038645
Idnk	75731	-1.11127	0.000558842	0.0190966
Apeh	235606	-1.11162	0.000367411	0.0154381
Prpf38a	230596	-1.11252	0.000728934	0.0216486
Hdac6	15185	-1.11278	0.00265371	0.042307
D1Ertd622e	52392	-1.11336	0.00455455	0.0546196
Capzb	12345	-1.11337	8.23912e-05	0.00708128
Pigb	55981	-1.11339	0.000878104	0.024005
Zw10	26951	-1.11344	0.00347956	0.0479074
Mrps18a	68565	-1.11347	0.00182258	0.0358696
Psmd2	21762	-1.11365	0.00441642	0.05376
Hdac4	208727	-1.11365	0.00678422	0.067033
Apba3	57267	-1.11426	0.0065798	0.066084
Cnih1	12793	-1.11486	0.000185884	0.0111852
Pglyrp1	21946	-1.11487	0.00213871	0.0382707
Lmf2	105847	-1.11535	0.00245944	0.0409556
Srsf7	225027	-1.11583	0.00082404	0.0229699
Arf1	11840	-1.11616	0.000499021	0.0178593
Slc25a39	68066	-1.1162	7.52452e-06	0.00158085
Ints7	77065	-1.11672	0.00261049	0.0418898
Ift20	55978	-1.11688	0.000248621	0.0127629
Slc35e1	270066	-1.11718	0.000651344	0.020397
Slc39a7	14977	-1.1172	0.00369383	0.0493954
Smim11	68936	-1.11771	0.000138248	0.00928064
Sgsm3	105835	-1.11778	0.0060413	0.0632275
Shisa5	66940	-1.118	0.000703062	0.0212097
Mcfd2	193813	-1.11853	0.00865367	0.076123
Slc25a35	71998	-1.11859	0.00310695	0.0462932
Ska1	66468	-1.11859	0.00601535	0.0632065
S100a10	20194	-1.11862	0.00129918	0.0297134
Mrpl35	66223	-1.11866	0.000445483	0.0168207
Nedd8	18002	-1.11886	0.0053327	0.0594882
Hcfc1r1	353502	-1.11894	0.0070924	0.0682128
Ndufaf3	66706	-1.11907	0.00183914	0.0358696
Ubqln2	54609	-1.11926	0.000844371	0.0231947
Pole3	59001	-1.11965	0.0034532	0.0477763
0610010K14Rik	104457	-1.11976	0.00284102	0.0439245
Nudt22	68323	-1.11982	0.00592205	0.0628939
Pomt2	217734	-1.11999	0.00154127	0.032904
Ube2j1	56228	-1.1208	0.000287993	0.0138222
Wdyhv1	76773	-1.12085	0.00764284	0.071014
Rab27a	11891	-1.12086	0.000643561	0.0202811
Timm8b	30057	-1.12088	0.0022061	0.0388641
Dnajc15	66148	-1.12116	0.00804427	0.0728667
Zbtb2	381990	-1.12144	0.00418069	0.0521617
Pde10a	23984	-1.12155	0.00658227	0.066084
Snrpa	53607	-1.1216	0.00823127	0.0739967
Cuedc2	67116	-1.1218	0.0026154	0.0419092
Golt1b	66964	-1.12187	0.00875474	0.0766704
Mrpl52	68836	-1.12197	0.000420774	0.0164044
Lama1	16772	-1.12215	0.00857569	0.075713
Ube2l3	22195	-1.12241	0.00159092	0.0334861
Mrpl53	68499	-1.12244	0.00709544	0.0682128
Nme3	79059	-1.12247	0.000342453	0.0148287
Sall3	20689	-1.12267	0.00679488	0.067033
Ndufa3	66091	-1.12287	0.000110076	0.00810921
Odf2l	52184	-1.12289	0.00558697	0.0608294
Calr	12317	-1.12314	0.00195835	0.0371531
Mien1	103742	-1.12337	0.00564824	0.0610861
Scml2	107815	-1.12355	0.00991911	0.0824413
Sub1	20024	-1.1236	0.00329011	0.0469989
Ibtk	108837	-1.12419	0.00102116	0.0262107
Aars2	224805	-1.12421	0.00210261	0.0380985
Dtymk	21915	-1.12427	0.00223606	0.0391572
Tmco3	234076	-1.12471	0.00997301	0.0826471
Zdhhc18	503610	-1.12484	0.00422997	0.0523326
Csnk2b	13001	-1.12495	4.14898e-05	0.00435835
Bak1	12018	-1.12497	0.00177152	0.0355447
Smim20	66278	-1.12519	0.00050223	0.0179176
Recql4	79456	-1.12593	0.00599029	0.0630425
Psma6	26443	-1.12604	0.00822195	0.0739967
Uqcr10	66152	-1.12605	0.00196352	0.0371887
Aars	234734	-1.12628	0.0045864	0.0547137
Atpaf2	246782	-1.12645	0.00478305	0.0557858
Eif3b	27979	-1.12669	0.00126382	0.029314
Glt8d1	76485	-1.12692	0.00555086	0.0605524
Pgp	67078	-1.12693	0.00326271	0.0469105
Cldn25	224250	-1.12738	0.00792751	0.0722811
Il27	246779	-1.12738	0.00689635	0.0673415
Rab35	77407	-1.12747	0.000537522	0.0186489
Irf2bp1	272359	-1.12814	0.00686845	0.0672327
Rpn1	103963	-1.12819	0.00445238	0.053949
Bet1	12068	-1.12834	0.00960876	0.0807492
Zfp275	27081	-1.12843	0.00613379	0.0635801
Bag3	29810	-1.12859	0.00712101	0.0682331
Alg12	223774	-1.12883	0.000393464	0.015813
Thoc6	386612	-1.12887	0.00683162	0.0672327
Rpa1	68275	-1.12935	0.00294661	0.0447515
AI846148	68229	-1.12952	0.00270753	0.0427812
Fpgt	75540	-1.13014	0.00637584	0.0649901
Psme1	19186	-1.1309	0.000208041	0.0118604
Dbi	13167	-1.13091	0.00115657	0.0279771
Mrps7	50529	-1.13098	0.0020413	0.0374734
Myl12a	67268	-1.13163	0.00235378	0.0397967
Tmem126a	66271	-1.13177	0.0025256	0.0412273
Myg1	60315	-1.13191	0.000183623	0.0111852
Nbas	71169	-1.13191	0.000602456	0.0196367
Psmc4	23996	-1.13196	0.00212851	0.0382087
Capn9	73647	-1.13302	0.00174288	0.0353722
6330407A03Rik	70720	-1.13309	0.00652766	0.0658273
Panx1	55991	-1.13322	0.00540117	0.0597474
Mall	228576	-1.13335	0.0063989	0.0650833
Cops6	26893	-1.13406	0.000470975	0.0172654
Ube2m	22192	-1.13408	0.00882455	0.0767516
Ung	22256	-1.1343	0.00893791	0.0775234
Banf1	23825	-1.13438	0.00273642	0.0429258
Tmem208	66320	-1.13443	0.000431165	0.016638
Psmc2	19181	-1.13453	0.00171154	0.0350496
Cer1	12622	-1.13475	0.00320316	0.04653
Bcat2	12036	-1.13523	0.00582565	0.0625871
1110008F13Rik	67388	-1.13526	0.00236591	0.0398238
Sf3a1	67465	-1.13551	0.00753744	0.070406
Ubfd1	28018	-1.13576	0.000726364	0.0216289
Efs	13644	-1.1358	0.00855977	0.0756314
Gpr20	239530	-1.13582	0.00746972	0.0702687
Sec11c	66286	-1.13582	0.00224465	0.0391572
Tmem97	69071	-1.1362	0.00888744	0.0772037
H2afy	26914	-1.13623	6.98547e-05	0.00639115
Scnm1	69269	-1.13625	0.000264386	0.0132135
Rabl2	68708	-1.13641	0.00284371	0.0439245
Nudt5	53893	-1.13677	0.00989233	0.0823394
Osgep	66246	-1.137	0.00421134	0.0522732
Krtap12-1	16694	-1.13743	0.00517248	0.0582739
Homer1	26556	-1.13745	0.00515239	0.058221
Rtn4ip1	170728	-1.13753	0.000388646	0.0157351
Nme6	54369	-1.13793	0.0059803	0.0630425
Bloc1s3	232946	-1.13871	0.000548607	0.0188054
Dap	223453	-1.13919	0.00211371	0.0380985
Bmx	12169	-1.13922	0.00466663	0.0553796
Toporsos	100504309	-1.13943	0.00678056	0.067033
Imp4	27993	-1.13968	0.000295274	0.0138425
Rbm14	56275	-1.1402	0.000634586	0.0201663
Pagr1a	67278	-1.14054	9.27637e-05	0.00760908
Sh3bgrl3	73723	-1.14065	0.00310326	0.0462932
Hpd	15445	-1.14066	0.00167511	0.0347425
Dpp9	224897	-1.14076	0.000843867	0.0231947
Slc50a1	19729	-1.14091	0.000620057	0.0198716
Josd2	66124	-1.14119	0.0047222	0.0555861
Pdia4	12304	-1.14221	0.000706679	0.0212097
Polr2j	20022	-1.1424	0.000114166	0.00813387
Guk1	14923	-1.14255	0.000128353	0.00877211
Ict1	68572	-1.14292	0.000284047	0.0137961
Rad9a	19367	-1.14294	0.00625525	0.0641645
Lck	16818	-1.1432	0.00618403	0.0638379
Slc17a8	216227	-1.14332	0.00344144	0.0477763
Vta1	66201	-1.14362	0.00494878	0.0567111
P4ha1	18451	-1.14421	0.00804137	0.0728667
Nop10	66181	-1.1444	0.00437032	0.0535435
Slc1a6	20513	-1.14453	0.00999627	0.0827431
Plod1	18822	-1.14478	0.00365014	0.0491232
Mrps17	66258	-1.14538	0.00517076	0.0582739
Csf2ra	12982	-1.14545	0.00610956	0.0635801
Klf8	245671	-1.1457	0.00254418	0.041315
Ide	15925	-1.14577	0.000604073	0.0196367
Cdc34	216150	-1.14596	0.00778935	0.0717291
Akip1	57373	-1.1461	0.00124568	0.029314
Bcl2	12043	-1.14649	0.00493278	0.0566745
Cox18	231430	-1.14658	0.00469145	0.055558
Smdt1	69029	-1.14663	3.91741e-06	0.00105817
Chid1	68038	-1.14703	0.000209365	0.0118763
Nup205	70699	-1.14725	0.00501296	0.0571579
Gm5737	436008	-1.1476	0.00539174	0.0597474
Ost4	67695	-1.1476	2.30699e-06	0.00070979
Paqr6	68957	-1.14772	0.00999918	0.0827431
Dcaf12l2	245403	-1.14778	0.00665353	0.0665694
Ermp1	226090	-1.14794	0.00553984	0.0604904
Ncbp1	433702	-1.14808	0.00114294	0.0277658
Timm13	30055	-1.1482	0.00319554	0.04653
Angptl6	70726	-1.14856	0.00876515	0.0766704
Ube2t	67196	-1.14885	0.00753774	0.070406
Atp6v0a4	140494	-1.14885	0.00601701	0.0632065
Siah1b	20438	-1.14891	0.00838598	0.0747948
Uqcc2	67267	-1.14917	0.000188678	0.0111852
Sez6l2	233878	-1.14923	0.00638809	0.0650565
Arpc4	68089	-1.14924	0.00361816	0.0488668
Dhrs7	66375	-1.14963	0.000230939	0.0122754
Pdzd11	72621	-1.14994	0.006588	0.066084
1110008P14Rik	73737	-1.15016	0.00539023	0.0597474
Id2	15902	-1.1502	0.00926666	0.0789859
Tdp1	104884	-1.15064	0.00724401	0.068888
Gars	353172	-1.15076	0.00767974	0.0712402
Zfp213	449521	-1.15088	0.0026057	0.041872
Aaas	223921	-1.15088	0.00279019	0.0434818
Cog8	97484	-1.15104	0.000284116	0.0137961
Uggt1	320011	-1.15128	1.567e-05	0.00225034
Sec23b	27054	-1.15135	0.000671823	0.0207115
Mrpl15	27395	-1.15137	0.000766092	0.022055
Pigf	18701	-1.15151	0.00082074	0.0229699
Sec24d	69608	-1.15156	0.00613141	0.0635801
Erp44	76299	-1.15224	0.000291185	0.0138222
Copg1	54161	-1.15228	8.34485e-07	0.000449841
Mrpl42	67270	-1.15247	0.00389749	0.0507319
Fam3b	52793	-1.15288	0.0065421	0.0658564
Pqbp1	54633	-1.15293	8.60879e-06	0.00165537
Leo1	235497	-1.15326	0.00772208	0.0714576
Wipf1	215280	-1.15328	0.00265887	0.042307
Agpat5	52123	-1.15348	0.000416364	0.0164016
Hyal2	15587	-1.15357	0.000648141	0.0203689
Sec13	110379	-1.15368	0.00246487	0.0409556
Pax2	18504	-1.15378	0.00855269	0.0756314
Irgc1	210145	-1.1538	0.00491498	0.0566096
Thap1	73754	-1.15395	0.00199083	0.0373209
Ubiad1	71707	-1.15396	0.000395831	0.015813
Syvn1	74126	-1.15429	0.000109813	0.00810921
Snrpd3	67332	-1.15432	0.00251689	0.0411443
Park7	57320	-1.15432	0.000962993	0.0253728
Ppp1r3g	76487	-1.15434	0.00480052	0.055834
Mmachc	67096	-1.15438	0.000643313	0.0202811
Fbl	14113	-1.1546	0.00478771	0.0557858
2310014L17Rik	381845	-1.1547	0.00350617	0.0480926
Rplp2	67186	-1.15473	3.31405e-05	0.00365834
Tspan31	67125	-1.15562	5.83338e-06	0.00129764
Wbscr22	66138	-1.15581	6.66248e-05	0.00628403
Runx2	12393	-1.15591	0.00382248	0.0501342
Gemin2	66603	-1.15628	0.000328691	0.0145097
Tagln2	21346	-1.15692	0.000529219	0.0185568
H1f0	14958	-1.15758	0.00611223	0.0635801
Arl3	56350	-1.15777	0.00200366	0.0374098
Ints10	70885	-1.15785	0.000466927	0.0172472
Trappc1	245828	-1.15806	9.73571e-05	0.0077239
Gltpd2	216871	-1.1583	0.00877874	0.0766704
Grpel1	17713	-1.15848	5.92234e-05	0.00579215
Ostc	66357	-1.15854	0.000740824	0.0217737
Gatc	384281	-1.15869	0.000585338	0.0193042
Pop5	117109	-1.15938	0.00338668	0.0474923
Tmem263	103266	-1.15945	0.00106369	0.0268302
Ndufb6	230075	-1.15966	0.00591163	0.0628939
Dpm2	13481	-1.15967	0.000238907	0.0125091
Prorsd1	67939	-1.16006	0.00184012	0.0358696
Syk	20963	-1.16011	0.00594748	0.0629424
Slc6a3	13162	-1.16023	0.00525686	0.0588892
Zfp516	329003	-1.16037	0.00136966	0.0307699
Bud31	231889	-1.16053	0.000454549	0.0169726
Naa50	72117	-1.16058	0.00376199	0.0498595
Mir129-1	387237	-1.16064	0.00172843	0.035268
Ngfrap1	12070	-1.16093	0.00138299	0.0309467
Tchhl1	71325	-1.16095	0.00441304	0.05376
Rln3	212108	-1.16109	0.00244942	0.0409556
Emg1	14791	-1.16126	0.000757722	0.0220419
Mrpl4	66163	-1.16148	0.000980943	0.0255835
Dnajc3	100037258	-1.16166	6.70223e-05	0.00628403
Trmt112	67674	-1.16185	0.00121961	0.0290683
Morf4l2	56397	-1.1621	0.0043561	0.053427
Agpat2	67512	-1.16283	0.0015895	0.0334861
Ndufa4	17992	-1.16285	0.00132775	0.0301266
Dctpp1	66422	-1.16293	0.000618229	0.0198691
Lman1	70361	-1.16349	0.000327501	0.0145097
Spcs2	66624	-1.16363	0.000108014	0.00810921
Chpf	74241	-1.16368	0.00143914	0.0317646
Psmb4	19172	-1.16389	0.000305982	0.0142269
Mogs	57377	-1.16415	0.000203064	0.0117539
Tmem150c	231503	-1.16458	0.00434371	0.053427
Mlec	109154	-1.16583	4.42577e-06	0.00114115
Elof1	66126	-1.16595	6.81846e-05	0.00633114
Adamts3	330119	-1.16614	0.0049406	0.0566745
2700029M09Rik	72612	-1.16771	0.00142899	0.0316021
Rpp21	67676	-1.1679	0.00326359	0.0469105
Farsa	66590	-1.16803	0.00198417	0.0373209
Zfhx2	239102	-1.16806	0.0033316	0.0471284
Sebox	18292	-1.16809	0.00478937	0.0557858
Spin2c	278240	-1.16842	0.00236266	0.0398238
Eif1ax	66235	-1.16853	0.00257201	0.041507
Tceb2	67673	-1.16892	0.000381356	0.0157327
Stk16	20872	-1.16934	2.39863e-05	0.00299038
Nrgn	64011	-1.16936	0.00669076	0.0665849
Magoh	17149	-1.16942	0.00304612	0.0459551
Rfc2	19718	-1.16945	0.00619815	0.0638675
Snora23	100379145	-1.16945	0.000230279	0.0122754
Med29	67224	-1.16996	0.00437734	0.0535717
Sap30	60406	-1.17062	0.00865567	0.076123
Snx3	54198	-1.17081	0.000768622	0.022055
Pold1	18971	-1.17082	0.00622769	0.0640555
Nudcd1	67429	-1.17095	0.00221989	0.0389856
Gm5136	368203	-1.17099	0.0055073	0.0603412
Pkmyt1	268930	-1.17187	0.00170949	0.0350496
Mtx1	17827	-1.1724	0.0018274	0.0358696
Copz1	56447	-1.17265	1.04632e-05	0.00173423
Ttc34	242800	-1.17266	0.00701229	0.0677836
Pold2	18972	-1.17272	0.00401191	0.0513136
Gstp1	14870	-1.17279	0.000104993	0.00802738
Pop7	74097	-1.17315	0.00443631	0.0538288
Gga2	74105	-1.17331	0.0092349	0.0787744
Mrps21	66292	-1.17376	0.00228075	0.0394437
Rangap1	19387	-1.17443	0.000703496	0.0212097
Hdc	15186	-1.17445	0.00248576	0.0409808
Txndc11	106200	-1.17446	0.000325837	0.0145097
Sidt1	320007	-1.1752	0.00316523	0.04653
Dnajb11	67838	-1.17523	0.00331001	0.0469989
Ubl5	66177	-1.17585	7.54235e-05	0.006685
Gpc1	14733	-1.17637	0.00108348	0.0270751
Cars	27267	-1.17639	0.00234911	0.0397967
Rhobtb1	69288	-1.1764	0.00550433	0.0603412
Slc39a6	106957	-1.17699	0.000171956	0.0107189
Mrpl34	94065	-1.17702	1.85956e-05	0.00248197
Xkr6	219149	-1.17712	0.00420024	0.0522121
0610009B22Rik	66050	-1.17712	7.13087e-05	0.00642062
Zmynd19	67187	-1.17734	0.00299798	0.0453494
Impdh1	23917	-1.17747	0.00385718	0.0503564
Hspd1	15510	-1.17767	0.00578698	0.0623488
Tmem229a	319832	-1.17783	0.00316886	0.04653
Olfr157	100040268	-1.17799	0.00785809	0.0720843
Atp5k	11958	-1.17821	0.000324018	0.0145097
Myadm	50918	-1.17842	0.00181725	0.0358552
Mrps18b	66973	-1.17852	0.00750955	0.070406
Dynll1	56455	-1.17867	0.00384832	0.0502986
Sgol2	68549	-1.17924	0.00477666	0.0557858
Jagn1	67767	-1.17932	0.000258831	0.0131091
Ppp1r11	76497	-1.17939	2.23496e-06	0.00070979
Mrpl20	66448	-1.17944	0.0012281	0.0291553
Ahsa2	268390	-1.17951	0.000290929	0.0138222
Mrpl11	66419	-1.17961	0.00111878	0.0275199
Vipr2	22355	-1.18003	0.00563669	0.0610193
Sae1	56459	-1.18031	0.00029244	0.0138239
Mb21d1	214763	-1.18038	0.00977954	0.0818811
Lrrc59	98238	-1.1806	0.00225773	0.0391993
Smarcb1	20587	-1.18072	9.57652e-05	0.0076511
Krtap9-3	75586	-1.18089	0.0034507	0.0477763
Haus8	76478	-1.1809	0.00248607	0.0409808
Cabp1	29867	-1.18091	0.00283446	0.0439245
Mrpl57	67840	-1.18091	0.000653559	0.020397
Casp16	381070	-1.18154	0.00197802	0.0372768
Lctl	235435	-1.1823	0.00357259	0.0485983
Tpd52l1	21987	-1.18237	0.00836749	0.0747188
Klhdc4	234825	-1.18256	0.00748507	0.0702965
Pdia6	71853	-1.18258	0.00271494	0.0428387
Med27	68975	-1.18271	0.0020065	0.0374098
Ak6	102216272	-1.18283	0.00306476	0.0460821
Ccr10	12777	-1.18283	0.00520408	0.0585137
Dpf3	70127	-1.18328	0.00186891	0.0362956
P4ha2	18452	-1.18411	0.0033006	0.0469989
Fgf11	14166	-1.18422	0.00754536	0.070406
Bola3	78653	-1.18442	0.000362806	0.0153583
Chordc1	66917	-1.18455	0.00176731	0.0355447
Galnt3	14425	-1.18534	0.000302607	0.0141279
Tal1	21349	-1.18561	0.0022597	0.0391993
Muc4	140474	-1.18602	0.00906577	0.0779767
Abhd14a	68644	-1.18614	0.000231551	0.0122754
Dut	110074	-1.18745	0.0068621	0.0672327
Rhbdl3	246104	-1.18762	0.00183123	0.0358696
1700067K01Rik	73453	-1.1884	0.00739201	0.069769
Ddt	13202	-1.18865	0.000395847	0.015813
Hilpda	69573	-1.1889	0.00204525	0.0374853
Slc35b1	110172	-1.18927	0.000632678	0.0201622
Igsf9b	235086	-1.18994	0.00516776	0.0582739
Srrd	70118	-1.19033	4.49296e-05	0.00467639
Ndufa2	17991	-1.19256	1.67864e-05	0.00232246
Zbtb32	58206	-1.19267	0.0043881	0.0535878
Gm5084	100503759	-1.19279	0.00693271	0.0674543
Elovl6	170439	-1.19288	0.00340924	0.0476916
Boc	117606	-1.19317	0.0022074	0.0388641
Cuta	67675	-1.19318	0.000136807	0.00923854
Cdyl2	75796	-1.19396	0.00234957	0.0397967
Gfod2	70575	-1.19468	0.00445573	0.053949
6030469F06Rik	100043065	-1.19493	0.00561088	0.0609143
Bard1	12021	-1.19601	0.000338331	0.0147064
Skp2	27401	-1.19605	0.00701436	0.0677836
Cep76	225659	-1.19615	0.00218354	0.0387331
Ggcx	56316	-1.19626	5.1891e-06	0.00127979
Wdr78	242584	-1.19664	0.00178282	0.0355447
Clhc1	69885	-1.19708	0.00416856	0.0521415
Ssr2	66256	-1.19722	1.06251e-05	0.00173423
Aimp2	231872	-1.19799	0.000239267	0.0125091
Pik3r5	320207	-1.19807	0.00234825	0.0397967
Tdrd1	83561	-1.19817	0.00344444	0.0477763
Nrm	106582	-1.19827	0.00133521	0.0302355
Shroom1	71774	-1.19841	0.00452898	0.0545038
Rad51ap1	19362	-1.19874	0.00769847	0.0713555
Foxp3	20371	-1.19936	0.00379759	0.0500173
Alox5ap	11690	-1.19976	0.00921511	0.078724
Mettl1	17299	-1.19978	0.00689831	0.0673415
Cacybp	12301	-1.20017	0.00160927	0.0337472
Tbl2	27368	-1.20056	0.000517142	0.0183343
Zfp367	238673	-1.2007	0.00317772	0.04653
Gm1943	384864	-1.20109	1.64e-06	0.000620194
Nup43	69912	-1.20133	0.0059678	0.0630398
Ndc1	72787	-1.20192	0.00545825	0.0601788
Morn2	378462	-1.20285	0.000883213	0.0240867
Pygl	110095	-1.20288	0.000174144	0.0107373
Prkrip1	66801	-1.20322	0.000162508	0.0103561
Adamts17	233332	-1.2039	0.00254554	0.041315
Cd4	12504	-1.20534	0.00679413	0.067033
Clca3	23844	-1.20543	2.76598e-05	0.00330317
Olfr78	170639	-1.20551	0.00612764	0.0635801
Fkbp4	14228	-1.20569	1.78974e-06	0.000634519
Olfr666	259100	-1.20689	0.000425256	0.0165034
Proser3	333193	-1.20821	0.00144415	0.0317816
Wnt3a	22416	-1.20898	0.0048292	0.0560198
Tuba4a	22145	-1.2094	0.00342433	0.0477763
Pycr1	209027	-1.21007	0.0017746	0.0355447
Fbxo36	66153	-1.21029	0.0028843	0.0441316
Polr2e	66420	-1.21037	0.000439471	0.0167872
Lsm2	27756	-1.21084	0.0015853	0.0334861
Chchd7	66433	-1.21108	1.9971e-06	0.000686578
P2ry4	57385	-1.21117	0.00524457	0.0588853
Chic2	74277	-1.21146	0.000221919	0.0121746
Ifi30	65972	-1.21165	4.27787e-06	0.00112866
Nrep	27528	-1.21191	0.00647614	0.0654246
Ankrd34b	218440	-1.21199	0.00294045	0.0447178
Dnmt1	13433	-1.21238	0.00230949	0.0395819
Oip5	70645	-1.21265	0.0054005	0.0597474
St3gal3	20441	-1.21282	0.00381956	0.0501342
Lrrc71	74485	-1.2133	0.00293829	0.0447178
Zdhhc25	70073	-1.21353	0.000257769	0.0131091
Aldh18a1	56454	-1.21437	0.0018957	0.0365422
Mrpl38	60441	-1.21442	1.71531e-05	0.0023446
Rps19bp1	66538	-1.21487	0.000115546	0.00814207
Cdr2	12585	-1.21509	0.0021676	0.038605
Exosc8	69639	-1.21556	0.00336204	0.0473829
Nolc1	70769	-1.21577	0.00991885	0.0824413
Mvb12b	72543	-1.21612	0.00498428	0.05697
H2-K2	630499	-1.2167	0.00208895	0.0380403
Timeless	21853	-1.21738	0.000607703	0.0196967
Sh2d6	71130	-1.21786	0.00105734	0.0267757
Olfr424	258716	-1.21861	0.000734614	0.0216802
Dmrta1	242523	-1.22078	0.0075131	0.070406
Klhdc8a	213417	-1.22194	0.00574728	0.0620051
Abcg1	11307	-1.22211	0.00123748	0.0292485
Cacna1h	58226	-1.22317	0.00442194	0.0537696
2016-03-03	320253	-1.22418	0.00112069	0.0275199
Shf	435684	-1.22474	0.00154297	0.032904
Hsp90b1	22027	-1.22495	1.73778e-05	0.00234704
Mcm6	17219	-1.22508	0.00847941	0.0752142
Rassf4	213391	-1.22619	0.00941557	0.0797162
Cox6b2	333182	-1.22626	0.000908989	0.0245536
Srprb	20818	-1.22628	1.93153e-05	0.00249014
Hist1h2ak	319169	-1.22716	0.000843816	0.0231947
Cenpm	66570	-1.22752	0.00981172	0.0819691
E2f7	52679	-1.22946	0.00395209	0.0508927
Cd44	12505	-1.2295	0.00413281	0.0518659
Slbp	20492	-1.22972	0.000186	0.0111852
Pola2	18969	-1.22975	0.00202379	0.0374194
Pemt	18618	-1.22976	0.000126518	0.00869904
Gspt2	14853	-1.23095	0.00377913	0.04997
Lypd6b	71897	-1.2313	0.00319436	0.04653
Sssca1	56390	-1.23307	9.52223e-06	0.00172248
Psmb2	26445	-1.23335	4.51441e-07	0.00034144
Higd2a	67044	-1.23369	6.49825e-08	7.37227e-05
Snai2	20583	-1.2346	0.00419657	0.0522121
6430628N08Rik	76237	-1.23482	0.00205352	0.0375762
Lgmn	19141	-1.23608	0.0063733	0.0649901
Pyy	217212	-1.23652	0.00285732	0.0439245
Ahsa1	217737	-1.23679	8.60673e-06	0.00165537
Nuf2	66977	-1.23726	0.00847377	0.0752142
Slc38a4	69354	-1.23845	0.00536301	0.0597474
Chn2	69993	-1.23951	0.0069172	0.0673611
BC030867	217216	-1.24033	0.00456655	0.0546196
Tcf19	106795	-1.24083	0.00109406	0.0271008
Gm1965	434065	-1.24099	0.00420181	0.0522121
Bcan	12032	-1.24127	0.00700131	0.067773
Tmem39a	67846	-1.2424	1.34963e-06	0.000567096
Plk4	20873	-1.24295	0.00193264	0.036977
St3gal1	20442	-1.24307	0.00935461	0.0793725
Rfc4	106344	-1.24319	0.00168216	0.034825
Bhlha15	17341	-1.24363	0.00968345	0.0811965
Wif1	24117	-1.24376	0.00549661	0.0603412
Nup93	71805	-1.24384	0.000575954	0.0191931
Gm5617	434402	-1.24428	2.24216e-06	0.00070979
Nmral1	67824	-1.2443	0.00129028	0.0296321
Mmp13	17386	-1.24539	0.00280955	0.0436635
Rcn1	19672	-1.24549	0.00112868	0.0275994
Ap1s1	11769	-1.24619	1.26065e-05	0.00188186
Dad1	13135	-1.24625	3.24359e-06	0.000897527
Znrd1	66136	-1.24855	2.61595e-06	0.000763542
Ccdc124	234388	-1.24856	0.000244039	0.0126421
Tube1	71924	-1.24901	0.000112042	0.00811747
Phf5a	68479	-1.25077	4.91543e-07	0.000348535
Cdc45	12544	-1.25099	0.00555749	0.0605665
Dna2	327762	-1.25191	0.00711413	0.0682331
Cck	12424	-1.25209	0.00319881	0.04653
Gm7257	639025	-1.25236	0.00231666	0.0395819
Il1b	16176	-1.25354	0.00762777	0.0709321
H2afz	51788	-1.25432	0.00529433	0.0592349
Hapln4	330790	-1.25435	0.000654831	0.020397
Scg3	20255	-1.25449	0.00162883	0.0340314
Zfp850	100043772	-1.25558	0.00107818	0.0270618
Dlk1	13386	-1.25655	0.0003884	0.0157351
Pcyox1l	240334	-1.25757	1.00147e-05	0.00173423
Smc2	14211	-1.25762	0.0050045	0.0571188
Mir3068	100526546	-1.25797	0.00117331	0.0283218
Sh2d7	244885	-1.25851	0.00505652	0.0575966
Maged1	94275	-1.25953	1.34023e-05	0.00194935
Ppm1l	242083	-1.26261	0.00043272	0.0166414
Adrbk2	320129	-1.26453	0.000163398	0.0103561
Mcm2	17216	-1.26511	0.00225037	0.0391572
Tceal8	66684	-1.26592	0.000107075	0.00809844
Pilra	231805	-1.26616	0.00616304	0.0637372
Brca1	12189	-1.26778	0.00273938	0.0429258
Tmem45a	56277	-1.26846	0.0003263	0.0145097
Pex5l	58869	-1.27001	0.000631493	0.0201622
Shisa3	330096	-1.27016	0.00389935	0.0507319
Atad2	70472	-1.27073	0.000418155	0.0164044
Tnfsf13	69583	-1.27182	0.00109078	0.027093
Mcm7	17220	-1.27252	0.00220306	0.0388641
Esco2	71988	-1.27331	0.00645585	0.065336
Kcnj2	16518	-1.27345	0.000290165	0.0138222
Ndufb3	66495	-1.27421	0.00198918	0.0373209
Rad54l	19366	-1.27441	0.00285188	0.0439245
Aldh1l2	216188	-1.27467	0.0075621	0.0704947
Cd300ld	217305	-1.27767	0.00611447	0.0635801
Nasp	50927	-1.27827	0.0023104	0.0395819
Nme1	18102	-1.27936	0.00254293	0.041315
Serp1	28146	-1.27969	1.18491e-05	0.00181998
Muc6	353328	-1.28033	0.00360906	0.0488602
Tppp	72948	-1.28166	0.00125681	0.029314
Fstl4	320027	-1.28321	0.000169018	0.0106084
Mad2l1	56150	-1.28528	0.00776972	0.0716064
Dclk1	13175	-1.28532	0.000223987	0.0121746
Tanc2	77097	-1.28539	1.3213e-06	0.000567096
Mcm5	17218	-1.28562	0.00203924	0.0374734
Kdelr3	105785	-1.28629	0.000270473	0.0133996
Grpr	14829	-1.28797	0.00127931	0.0295031
Rnasek	52898	-1.28816	1.16169e-05	0.00181998
Dtl	76843	-1.28879	0.00263542	0.0421111
Dixdc1	330938	-1.2894	0.000772663	0.022055
1810055G02Rik	72056	-1.28983	0.000193512	0.0113165
Spdef	30051	-1.29065	0.00811412	0.0733504
Ect2	13605	-1.2908	0.0064245	0.0651932
Pclo	26875	-1.29207	0.000577112	0.0191931
Hspa5	14828	-1.29331	0.000104037	0.00802738
Ccr1	12768	-1.29512	0.00349119	0.0479575
Strip2	320609	-1.29521	0.000123515	0.00854439
Hist2h4	97122	-1.29525	0.00148437	0.0322609
Fen1	14156	-1.29625	0.00249244	0.0409808
Nr4a2	18227	-1.29793	8.07071e-05	0.00698948
Exo1	26909	-1.29818	0.00156774	0.0331829
Guca2b	14916	-1.29826	2.84599e-05	0.00336332
Kcnk6	52150	-1.29928	8.38536e-06	0.00165537
Zfp9	22750	-1.29969	6.86408e-05	0.00633114
Fxyd3	17178	-1.30241	9.62983e-06	0.00172248
Wdr83os	414077	-1.30323	0.000389737	0.0157351
Cdca5	67849	-1.30431	0.00744463	0.0700908
Tspan6	56496	-1.30474	3.01777e-05	0.00345825
Alg8	381903	-1.3059	3.32136e-05	0.00365834
Cpm	70574	-1.30611	0.000268195	0.0133451
Pole	18973	-1.30719	0.00229169	0.0394607
Mt3	17751	-1.3094	0.000173589	0.0107373
Alg3	208624	-1.30982	1.25143e-05	0.00188186
Gm13139	666532	-1.31102	0.00668309	0.0665694
Bub1	12235	-1.31228	0.00874157	0.0766704
Sdf2l1	64136	-1.31455	0.0013473	0.030388
Cdc42ep2	104252	-1.31536	0.00149361	0.0323997
Chrm3	12671	-1.31577	0.00011132	0.00811747
Gm5446	432730	-1.31996	0.00452694	0.0545038
Rgs13	246709	-1.32154	0.00433057	0.0533445
Rangrf	57785	-1.32201	9.06491e-05	0.00756187
Plet1	76509	-1.32368	4.60923e-05	0.00471097
Stip1	20867	-1.32476	6.51654e-07	0.00040399
2610524H06Rik	330173	-1.32528	0.00194429	0.03701
Foxm1	14235	-1.33022	0.00493473	0.0566745
Sgk3	170755	-1.33068	2.93135e-05	0.00342847
Hist1h2ab	319172	-1.33073	0.00476929	0.0557858
Slc7a6	330836	-1.33207	2.77791e-06	0.000787885
Armcx6	278097	-1.33564	0.000152878	0.0100254
Gm10069	791299	-1.33614	0.000192402	0.0113098
Rad51	19361	-1.33638	0.00173259	0.0352896
E2f8	108961	-1.3367	0.00544568	0.0600985
Asns	27053	-1.33838	0.00254237	0.041315
Tppp3	67971	-1.339	0.00175864	0.0355015
Dnph1	381101	-1.33929	0.00594126	0.0629424
Dxo	112403	-1.34265	0.00439341	0.053595
1700011H14Rik	67082	-1.34627	0.0058584	0.0626424
Drd3	13490	-1.34643	0.00267089	0.0423794
Zcchc3	67917	-1.34773	0.000819703	0.0229699
Krtap5-2	71623	-1.34921	0.00571478	0.0617469
Alox5	11689	-1.35126	4.56749e-05	0.00471075
Resp18	19711	-1.35347	0.00151587	0.0326329
Ccdc92	215707	-1.35803	0.000377828	0.015644
Asf1b	66929	-1.3581	0.0016591	0.0345367
Uhrf1	18140	-1.36074	0.00144551	0.0317816
Cmc2	66531	-1.36155	4.74229e-08	7.18372e-05
Fcgr4	246256	-1.36215	0.000685599	0.021022
Cks1b	54124	-1.36257	0.0028407	0.0439245
Sst	20604	-1.37122	0.000529961	0.0185568
Krtcap2	66059	-1.37152	3.22506e-08	6.09806e-05
Manf	74840	-1.37322	3.06396e-05	0.00347607
Mgll	23945	-1.37329	0.000387226	0.0157351
Hist1h1a	80838	-1.38767	0.000335581	0.014665
Hist1h2bm	319186	-1.39113	0.000756549	0.0220419
Tnfrsf17	21935	-1.39533	0.00553617	0.0604904
Zfp37	22696	-1.41059	8.59174e-05	0.00727413
Pdgfc	54635	-1.41291	0.00108231	0.0270751
Lpo	76113	-1.41989	0.00776388	0.0716064
Nudt10	102954	-1.42076	0.00710086	0.0682128
2810417H13Rik	68026	-1.42804	0.00322621	0.0466855
Sptssb	66183	-1.43375	0.000364243	0.0153618
Etv5	104156	-1.44103	0.000542185	0.0187533
Hspa1a	193740	-1.44148	0.00246134	0.0409556
LOC100504608	100504608	-1.44368	5.0781e-05	0.00509832
Ssbp2	66970	-1.44399	0.000523494	0.0184442
Klrb1b	80782	-1.45028	0.000966157	0.0253728
Lancl3	236285	-1.4593	1.16845e-05	0.00181998
Hyou1	12282	-1.46116	1.3102e-06	0.000567096
Copz2	56358	-1.46363	1.60805e-07	0.000152028
Creld2	76737	-1.46611	8.72322e-07	0.000449841
Map10	74393	-1.47574	1.69564e-06	0.000620548
Scnn1b	20277	-1.47811	0.00213242	0.0382184
Gm12253	624860	-1.48109	0.00138232	0.0309467
Nkg7	72310	-1.4831	0.0013472	0.030388
Rpp25	102614	-1.48721	0.00160582	0.0337371
Nt5dc2	70021	-1.50593	1.1782e-06	0.000556945
Cd7	12516	-1.51291	0.00166446	0.0345849
Ubtd2	327900	-1.51449	1.59939e-09	9.07252e-06
Ceacam12	67315	-1.51471	0.00476698	0.0557858
2210407C18Rik	78354	-1.51498	0.00103424	0.0264865
B3gnt6	272411	-1.53555	6.32e-05	0.00607631
Trdc	100123473	-1.54291	0.000770309	0.022055
Bmp8b	12164	-1.55557	0.000409157	0.0162304
Derl3	70377	-1.56291	0.000152411	0.0100254
Cmah	12763	-1.57686	2.96672e-05	0.00343444
Tcrg-C4	107576	-1.58724	0.000278804	0.0137248
Trdv4	100114901	-1.58955	0.00220955	0.0388641
Nfil3	18030	-1.59098	0.000230908	0.0122754
Atf3	11910	-1.60929	0.00410185	0.051723
Mzb1	69816	-1.65408	0.00206687	0.0377594
Casc4	319996	-1.65619	5.06565e-08	7.18372e-05
Hsph1	15505	-1.70727	1.29893e-05	0.00191382
Ido1	15930	-1.77944	2.31487e-06	0.00070979
2310079G19Rik	69699	-1.82014	0.000398713	0.0158716
Frmd3	242506	-1.83351	1.36239e-07	0.000140512
Iglv3	404743	-1.92012	0.000611544	0.0197101
Cadps	27062	-1.97984	6.25531e-08	7.37227e-05
Dhrs9	241452	-2.16939	0.000222492	0.0121746
Retnlb	57263	-2.58844	9.42215e-05	0.00763532
Igkv4-57	235952	-2.60851	0.000843689	0.0231947
Iglc2	110786	-2.94407	0.000963933	0.0253728
Igkv3-12	667914	-3.2099	0.00954913	0.0804268
Iglv1	16142	-3.26122	0.000200837	0.0116846
Reg3b	18489	-3.29551	0.00993633	0.0824636
Iglv2	110612	-3.50205	0.0017264	0.035268
Ighg3	380795	-3.62505	0.000445855	0.0168207
Ang4	219033	-4.79349	1.92977e-05	0.00249014
Igkv8-24	677858	-7.63363	0.000925706	0.024753
