# Supplementary material for: Integrative analysis of gut microbiota composition, host colonic gene expression and intraluminal metabolites in aging C57BL/6J mice
Source: Aging (Albany NY). 2018 May 16;10(5):930–50. doi: 10.18632/aging.101439 (PMC5990381; doi:10.18632/aging.101439)
Supplement: Data Set S5 [file aging-10-101439-s007.xlsx]

## Sheet: correlation
Gene	Bacillus	Allobaculum	Lactobacillus	Bifidobacterium	uncultured Coriobacteriaceae	Incertae Sedis Erysipelotrichaceae	Candidatus Saccharimonas	unidentified vadinBB60	Parasutterella	uncultured bacterium Gastranaerophilales	uncultured Lachnospiraceae	Akkermansia	Alloprevotella	uncultured bacterium S24 7	uncultured Lachnospiraceae	Alistipes	uncultured Peptostreptococcaceae	Clostridium sensu stricto 1	Incertae Sedis Peptostreptococcaceae	uncultured bacterium vadinBB60	uncultured Defluviitaleaceae	Parabacteroides	Odoribacter	Bacteroides	uncultured Porphyromonadaceae	uncultured bacterium VC2 1 Bac22	RC9 gut group	Coprococcus	Turicibacter	Blautia	Incertae Sedis family XIII	uncultured Erysipelotrichaceae	Intestinimonas	Roseburia	uncultured Ruminococcaceae	Incertae Sedis Ruminococcaceae	Peptococcus	Anaerovorax	uncultured Peptococcaceae	Ruminococcus	Anaerotruncus	uncultured Christensenellaceae	Incertae Sedis Lachnospiraceae	Desulfovibrio	Oscillibacter	Incertae Sedis Defluviitaleaceae	Bilophila
A230046K03Rik	-0.275978	-0.377146	-0.177239	-0.569802	-0.168013	-0.125493	-0.634408	-0.615602	-0.699804	-0.684237	-0.535055	-0.310057	-0.319665	-0.0957228	0.204558	0.0766373	0.122422	0.317069	-0.360208	-0.293095	0.0510185	-0.0211746	0.000274861	0.149716	0.163546	0.226012	0.463402	0.435935	0.634122	-0.0104547	0.221995	0.113092	0.471223	0.529877	0.555037	0.651797	0.355739	0.28411	0.229716	0.413229	0.317353	0.273953	0.525185	0.503776	0.44731	0.464897	0.450897
A330023F24Rik	0.0345767	0.0146722	0.166844	0.00608255	0.373104	0.328716	-0.302938	-0.548322	-0.45085	-0.537409	-0.386317	-0.368341	-0.420355	0.141745	0.153813	-0.0332874	-0.0991887	0.088228	-0.133339	-0.306358	-0.23769	-0.415793	-0.536738	-0.395714	-0.332472	-0.0277691	-0.117015	0.19107	0.259658	0.0131265	0.240532	0.125721	0.487896	0.372361	0.605867	0.556569	0.108197	0.438399	0.379292	0.612419	0.429164	0.444837	0.534822	0.59882	0.553807	0.458261	0.449979
A630001G21Rik	-0.344023	-0.410832	-0.201006	-0.555371	-0.205851	-0.12535	-0.65262	-0.634298	-0.666354	-0.612863	-0.433267	-0.246045	-0.208753	-0.210889	0.0776136	-0.0290421	0.0497681	0.233117	-0.433593	-0.371354	0.0811051	0.0295642	-0.0137932	0.162442	0.187806	0.199679	0.44986	0.45272	0.614945	-0.0430489	0.180058	0.142809	0.380563	0.444283	0.502543	0.596364	0.436158	0.354611	0.325928	0.388838	0.289719	0.266828	0.503526	0.50296	0.499462	0.474498	0.486032
AA415398	0.00209543	-0.0376219	0.117559	-0.0849128	0.294219	0.255138	-0.34527	-0.547043	-0.490229	-0.568589	-0.426629	-0.368902	-0.424283	0.129527	0.187956	0.00759684	-0.0478271	0.140719	-0.149637	-0.28269	-0.197306	-0.361536	-0.444649	-0.310238	-0.257951	0.0171462	-0.0240462	0.222032	0.3175	0.0166716	0.243901	0.115453	0.499171	0.410564	0.601804	0.576062	0.126401	0.393236	0.329869	0.579378	0.412603	0.414473	0.531064	0.576528	0.518493	0.450993	0.436223
Aaas	0.156941	0.100654	-0.127113	0.00255809	-0.342859	-0.390616	0.469095	0.767884	0.521071	0.527104	0.251807	0.309004	0.251782	0.133334	0.124172	0.307802	0.298825	0.0834636	0.382433	0.600369	0.20759	0.37721	0.690625	0.436952	0.328857	0.0832475	0.139197	-0.312562	-0.319522	0.069252	-0.203051	-0.239568	-0.399128	-0.27629	-0.648691	-0.589033	-0.369627	-0.740485	-0.730482	-0.717654	-0.477925	-0.546522	-0.639445	-0.769634	-0.847207	-0.622047	-0.676894
Aaed1	0.0781916	0.00210487	0.188817	-0.0900835	0.436748	0.349373	-0.406766	-0.677678	-0.640755	-0.778971	-0.624233	-0.528924	-0.642441	0.277609	0.346955	0.0954182	-0.00981938	0.239979	-0.115095	-0.293305	-0.293019	-0.52595	-0.583337	-0.435638	-0.376336	0.031161	-0.0498477	0.25549	0.401473	0.0507609	0.348303	0.122118	0.715891	0.589247	0.815488	0.777432	0.0782722	0.448485	0.345161	0.770445	0.555966	0.543723	0.696377	0.740831	0.621541	0.566329	0.525674
Aars	0.227287	0.192152	-0.0517094	0.139735	-0.227992	-0.29363	0.55739	0.801564	0.596454	0.582395	0.303539	0.309639	0.245672	0.181122	0.102647	0.279186	0.246989	0.0232605	0.438317	0.60479	0.147932	0.299032	0.580435	0.32096	0.22289	0.0229546	0.00468007	-0.376581	-0.417864	0.0733086	-0.208111	-0.239756	-0.414557	-0.329091	-0.658644	-0.632157	-0.429346	-0.71606	-0.704327	-0.691603	-0.466631	-0.521011	-0.655765	-0.767082	-0.838624	-0.638612	-0.690953
Aars2	0.283309	0.320022	0.0912681	0.400868	0.0134374	-0.0508587	0.628952	0.723064	0.671373	0.645642	0.426914	0.303735	0.269263	0.167157	-0.0450548	0.1027	0.0521985	-0.158951	0.426725	0.459296	0.0248466	0.128101	0.25407	0.0445262	-0.00926671	-0.119614	-0.274474	-0.430566	-0.55847	0.0467634	-0.212661	-0.179851	-0.439232	-0.439187	-0.605535	-0.65181	-0.422055	-0.499774	-0.468779	-0.541623	-0.385718	-0.388488	-0.594584	-0.635305	-0.646358	-0.559188	-0.580211
Abcc2	-0.101599	-0.20461	-0.0357064	-0.375	0.0516885	0.0288966	-0.488566	-0.557571	-0.627272	-0.681211	-0.564031	-0.379466	-0.446322	0.0926787	0.299238	0.135786	0.112527	0.309433	-0.206147	-0.216233	-0.074221	-0.198553	-0.16496	-0.0476019	-0.0284693	0.159424	0.269449	0.326086	0.508662	0.0278879	0.260384	0.086373	0.546701	0.541088	0.603986	0.652097	0.188431	0.261518	0.183359	0.489619	0.370604	0.329104	0.532778	0.521046	0.420985	0.439922	0.404577
Abcc6	-0.116808	-0.108719	0.111107	-0.0866671	0.316535	0.332116	-0.482806	-0.746294	-0.581416	-0.617134	-0.378828	-0.36915	-0.359328	-0.0328167	0.0233758	-0.174577	-0.188922	0.0372602	-0.323873	-0.505453	-0.204182	-0.382076	-0.603462	-0.38131	-0.293053	-0.0231585	-0.0538827	0.319408	0.381327	-0.0352696	0.244777	0.202493	0.492563	0.386195	0.69306	0.654639	0.305903	0.635796	0.598094	0.712634	0.489621	0.527789	0.654771	0.750329	0.767188	0.605005	0.630358
Abcg1	0.102251	0.0730043	-0.0996918	0.018601	-0.267007	-0.291696	0.361091	0.585724	0.418242	0.434643	0.233781	0.26	0.232143	0.0655132	0.0484805	0.196409	0.199287	0.0292352	0.27226	0.433527	0.165041	0.301037	0.515974	0.33024	0.252186	0.0495063	0.0907675	-0.239383	-0.260369	0.0419423	-0.171195	-0.173396	-0.339888	-0.246921	-0.517484	-0.47551	-0.260254	-0.541429	-0.524481	-0.557435	-0.375777	-0.41997	-0.499979	-0.59095	-0.631204	-0.475551	-0.508388
Abcg5	-0.136531	-0.287887	-0.0862126	-0.542018	-0.00842139	-0.039827	-0.619927	-0.658002	-0.795212	-0.86078	-0.738135	-0.468682	-0.56357	0.127202	0.422933	0.229691	0.204199	0.442697	-0.243368	-0.21384	-0.0552788	-0.194585	-0.100021	0.0262919	0.0351096	0.241824	0.418081	0.41532	0.668965	0.0450375	0.324109	0.0849861	0.685395	0.704586	0.72849	0.810285	0.222411	0.248055	0.144171	0.555949	0.431652	0.363117	0.636189	0.59825	0.452545	0.514151	0.459054
Abcg8	-0.112898	-0.272137	-0.0861006	-0.537657	-0.0166602	-0.0579156	-0.585438	-0.608677	-0.766775	-0.839161	-0.737672	-0.461159	-0.567374	0.156093	0.449897	0.263512	0.230981	0.458404	-0.206442	-0.16591	-0.0509911	-0.184702	-0.0628417	0.0440579	0.0451831	0.248085	0.421945	0.39133	0.648811	0.0545931	0.318923	0.0661835	0.676285	0.699998	0.698884	0.78304	0.184895	0.19463	0.0872029	0.519459	0.408926	0.333727	0.60177	0.553754	0.395159	0.475616	0.413271
Abhd14a	-0.121107	0.0269044	-0.0915038	0.242611	-0.240477	-0.120535	0.324452	0.439964	0.575574	0.726192	0.687209	0.485947	0.654758	-0.379118	-0.527052	-0.324129	-0.209214	-0.406472	-0.0223572	0.0264657	0.190891	0.367623	0.228605	0.18386	0.181298	-0.144616	-0.146201	-0.201658	-0.413498	-0.0996204	-0.324687	-0.015422	-0.682644	-0.630276	-0.658663	-0.676991	0.0574911	-0.112821	0.0126255	-0.528082	-0.411235	-0.342817	-0.520729	-0.483501	-0.283526	-0.36792	-0.282988
Abi1	-0.162506	-0.241568	-0.0553327	-0.379362	0.0263616	0.033805	-0.52848	-0.603549	-0.631729	-0.657301	-0.50796	-0.346635	-0.377826	0.00210995	0.20804	0.0531578	0.0557462	0.253877	-0.277904	-0.294356	-0.0549061	-0.169365	-0.189701	-0.0433049	-0.0130245	0.144144	0.268727	0.356474	0.517778	0.00203914	0.239383	0.116326	0.500248	0.497381	0.59318	0.640423	0.265014	0.336567	0.275808	0.497322	0.368408	0.342378	0.543829	0.549669	0.488956	0.472173	0.456507
Acadsb	-0.230186	-0.327883	-0.109187	-0.504555	-0.0428291	-0.0201766	-0.645117	-0.696412	-0.747823	-0.760751	-0.58881	-0.38161	-0.407933	-0.0372619	0.233169	0.0663629	0.0863055	0.311639	-0.351015	-0.339108	-0.0228128	-0.137672	-0.147487	0.0221557	0.0511108	0.194595	0.379412	0.438247	0.635572	-0.00327523	0.266517	0.132963	0.559562	0.579181	0.663807	0.736147	0.339576	0.368295	0.301829	0.537862	0.402305	0.366686	0.615422	0.612669	0.546301	0.538492	0.521938
Acap2	-0.364209	-0.435429	-0.188007	-0.586063	-0.161172	-0.0800171	-0.74122	-0.761216	-0.775388	-0.729608	-0.512748	-0.314581	-0.279703	-0.209763	0.0967866	-0.0444937	0.0310259	0.254374	-0.48643	-0.448655	0.0501606	-0.0313539	-0.101822	0.109576	0.1475	0.204931	0.456594	0.511452	0.691407	-0.0460765	0.225947	0.173774	0.474108	0.523463	0.62525	0.716474	0.485673	0.451487	0.41367	0.50811	0.373482	0.353383	0.617346	0.628667	0.621951	0.576805	0.589721
Ace	-0.235591	-0.344164	-0.129612	-0.540726	-0.0784309	-0.0569197	-0.650762	-0.678857	-0.754248	-0.76607	-0.605176	-0.379129	-0.410683	-0.0325344	0.256419	0.0948153	0.116723	0.338675	-0.345127	-0.312863	-0.00454388	-0.111683	-0.0964962	0.0637395	0.0855151	0.215325	0.419247	0.442809	0.652536	0.00144126	0.266046	0.122258	0.560924	0.593275	0.651794	0.734705	0.334286	0.331229	0.261818	0.51151	0.387535	0.343928	0.601924	0.588043	0.511915	0.52217	0.500467
Acer2	-0.157079	-0.270313	-0.0743349	-0.463939	0.00396674	-0.00460251	-0.579925	-0.635914	-0.715328	-0.757616	-0.618369	-0.404269	-0.463579	0.0545515	0.306735	0.133733	0.125369	0.343922	-0.268938	-0.261933	-0.051863	-0.177323	-0.144927	-0.0055826	0.0148605	0.192695	0.346121	0.390199	0.596223	0.0208589	0.279672	0.103627	0.588334	0.597571	0.659775	0.724902	0.252584	0.299208	0.218614	0.526693	0.399452	0.353425	0.591293	0.5766	0.477228	0.4966	0.463143
Acpp	-0.300053	-0.432935	-0.265584	-0.687601	-0.332387	-0.286734	-0.614678	-0.48925	-0.662138	-0.630765	-0.535783	-0.253043	-0.271548	-0.102019	0.256512	0.170005	0.231598	0.391013	-0.32636	-0.171224	0.141593	0.117823	0.233882	0.335621	0.318428	0.29606	0.607274	0.426907	0.65551	0.00217719	0.188493	0.0632161	0.410619	0.525508	0.437132	0.57442	0.327257	0.110017	0.0543933	0.248794	0.213802	0.143097	0.412476	0.347414	0.266631	0.353752	0.324876
Acss2	-0.0204339	-0.109654	0.0750859	-0.240972	0.245832	0.193275	-0.465324	-0.639656	-0.651961	-0.746768	-0.603314	-0.461905	-0.549959	0.178174	0.320567	0.108866	0.0464447	0.275826	-0.174322	-0.270967	-0.185169	-0.366946	-0.385309	-0.245725	-0.20427	0.0967144	0.114405	0.302897	0.469285	0.0371188	0.309696	0.110605	0.642113	0.575131	0.726866	0.732376	0.146993	0.373011	0.282034	0.646872	0.474814	0.448947	0.632015	0.650688	0.542915	0.520285	0.483679
Acvr1c	-0.163263	-0.130713	0.0893883	-0.0749364	0.277496	0.32037	-0.481415	-0.736107	-0.539154	-0.545936	-0.293206	-0.310705	-0.267051	-0.115968	-0.0693632	-0.24538	-0.235003	-0.0242539	-0.367342	-0.546002	-0.175038	-0.331961	-0.592901	-0.358406	-0.264741	-0.0408557	-0.06045	0.321993	0.35617	-0.0578545	0.206444	0.217531	0.410932	0.312112	0.632606	0.59367	0.355107	0.666163	0.648341	0.671555	0.453571	0.505243	0.618031	0.725424	0.780152	0.59259	0.635644
Adamts17	0.32322	0.398354	0.179908	0.552423	0.164345	0.0964619	0.667779	0.670196	0.704824	0.667222	0.483158	0.28824	0.265677	0.172356	-0.116809	0.00906712	-0.056385	-0.2561	0.424903	0.376811	-0.0538862	0.0165339	0.0558526	-0.124806	-0.152789	-0.200965	-0.43843	-0.460746	-0.634791	0.0345806	-0.207448	-0.145654	-0.437161	-0.489444	-0.559741	-0.649108	-0.423829	-0.373002	-0.334155	-0.441735	-0.32886	-0.303152	-0.548172	-0.548564	-0.530039	-0.506333	-0.511622
Adamts3	0.305455	0.337985	0.115797	0.416297	0.0590346	-0.0165999	0.622747	0.693594	0.645324	0.605159	0.391214	0.268852	0.222505	0.201204	-0.0170693	0.113837	0.0506777	-0.147159	0.436652	0.451909	-0.0034539	0.0822083	0.206444	0.00130821	-0.0488345	-0.124864	-0.297142	-0.428557	-0.550425	0.0533941	-0.190447	-0.176228	-0.393927	-0.40716	-0.557769	-0.611067	-0.435281	-0.478648	-0.455526	-0.493383	-0.351099	-0.354318	-0.557338	-0.594735	-0.616554	-0.532126	-0.557491
Adh7	-0.118796	-0.255878	-0.133422	-0.492887	-0.136435	-0.157545	-0.440462	-0.383698	-0.555897	-0.592078	-0.545275	-0.300509	-0.378035	0.0900964	0.354282	0.244683	0.238069	0.385775	-0.151318	-0.0595193	0.0309506	-0.0333593	0.112314	0.167031	0.148706	0.234066	0.422368	0.298362	0.509735	0.0436142	0.212495	0.0225264	0.457535	0.516318	0.44321	0.535692	0.140068	0.0432786	-0.0345029	0.278829	0.235781	0.163353	0.379001	0.316092	0.188817	0.290005	0.23729
Adprhl2	0.145076	-0.0363343	0.049389	-0.308842	0.153928	0.0174038	-0.282315	-0.327356	-0.542875	-0.700745	-0.716497	-0.46703	-0.662773	0.430444	0.612634	0.431746	0.310821	0.483437	0.0900071	0.0997123	-0.146043	-0.297623	-0.0669483	-0.0709806	-0.0947357	0.195762	0.232835	0.173772	0.415705	0.123183	0.314237	-0.0349413	0.668193	0.648979	0.586029	0.629466	-0.124628	-0.0442437	-0.180423	0.416375	0.344603	0.250128	0.438499	0.363476	0.125094	0.274482	0.168507
Adrbk1	0.211878	0.286522	0.081963	0.422793	0.00800207	-0.0178718	0.58459	0.654302	0.671897	0.680688	0.509739	0.343488	0.357273	0.0510526	-0.175973	-0.0210436	-0.0408481	-0.248419	0.333764	0.343519	0.0355821	0.145698	0.186301	0.0194564	-0.0152709	-0.154133	-0.305172	-0.396888	-0.560689	0.0111532	-0.238945	-0.134997	-0.499074	-0.504947	-0.611433	-0.666644	-0.323503	-0.379971	-0.325047	-0.513777	-0.378403	-0.35602	-0.572106	-0.582822	-0.53765	-0.508119	-0.500859
Adrbk2	0.232234	0.382394	0.168189	0.649002	0.138915	0.133718	0.690943	0.673947	0.822449	0.847916	0.712391	0.420896	0.483478	-0.0212896	-0.368118	-0.199424	-0.213244	-0.445292	0.323105	0.246329	-0.019726	0.0861895	-0.00588681	-0.145452	-0.149438	-0.279362	-0.52775	-0.469832	-0.730468	-0.0240318	-0.296704	-0.0957049	-0.631176	-0.688787	-0.685012	-0.794879	-0.310039	-0.247157	-0.157683	-0.496951	-0.390579	-0.320331	-0.617037	-0.571746	-0.450606	-0.514665	-0.471208
Adssl1	0.045719	-0.0573584	0.0696239	-0.208412	0.203848	0.12884	-0.332847	-0.452876	-0.520522	-0.626084	-0.551852	-0.403309	-0.514815	0.242016	0.366999	0.191351	0.114878	0.295223	-0.0595019	-0.118636	-0.158585	-0.310271	-0.253329	-0.177938	-0.1607	0.105326	0.114619	0.212451	0.37527	0.0599687	0.269995	0.0504985	0.564219	0.514814	0.586451	0.597706	0.0328107	0.197517	0.104473	0.494631	0.374017	0.332313	0.486362	0.476293	0.342537	0.372717	0.319512
Agmo	-0.0927468	-0.11872	0.0841689	-0.152574	0.26493	0.261228	-0.472322	-0.68954	-0.592873	-0.642748	-0.442745	-0.384342	-0.404607	0.0274549	0.119063	-0.0746111	-0.099995	0.119861	-0.273057	-0.413282	-0.181428	-0.35098	-0.495359	-0.3067	-0.23801	0.0244818	0.0213543	0.311767	0.409328	-0.0118124	0.256624	0.165972	0.523136	0.438831	0.678841	0.660692	0.253411	0.525422	0.472163	0.660961	0.464656	0.479115	0.62521	0.690139	0.66631	0.557915	0.56247
Ago1	-0.0905948	-0.167544	0.032252	-0.287928	0.181424	0.158915	-0.517297	-0.673468	-0.66908	-0.733628	-0.567598	-0.428383	-0.485545	0.0897961	0.253382	0.0547873	0.0211992	0.249936	-0.244492	-0.325845	-0.14596	-0.310205	-0.357395	-0.196711	-0.151242	0.104623	0.159098	0.342346	0.501605	0.0155486	0.289616	0.130981	0.600037	0.549629	0.707951	0.724411	0.222678	0.413389	0.336657	0.630719	0.459828	0.441065	0.633625	0.658461	0.580225	0.5401	0.518105
Agpat2	0.0822607	0.197825	0.0254267	0.385817	-0.0724269	-0.0368612	0.498679	0.574356	0.658662	0.726872	0.613266	0.413727	0.496979	-0.131992	-0.346006	-0.169034	-0.133985	-0.342029	0.190892	0.203644	0.0899525	0.226724	0.175913	0.0612737	0.0438094	-0.169489	-0.275602	-0.331197	-0.529324	-0.0384283	-0.28302	-0.0818824	-0.594618	-0.584756	-0.644194	-0.692912	-0.170186	-0.255062	-0.166482	-0.519547	-0.395216	-0.347205	-0.560884	-0.54417	-0.425471	-0.455289	-0.411494
Agpat5	0.0625585	0.114063	-0.1046	0.184153	-0.31146	-0.284083	0.514508	0.751708	0.679932	0.758197	0.55632	0.465415	0.517277	-0.101248	-0.213187	0.0140167	0.0619596	-0.188567	0.257757	0.407232	0.216828	0.416452	0.533366	0.341622	0.273502	-0.0465803	-0.0384541	-0.336854	-0.469101	-0.00745453	-0.310462	-0.164555	-0.636406	-0.541761	-0.783986	-0.767338	-0.231757	-0.534742	-0.459479	-0.744707	-0.530515	-0.53281	-0.705434	-0.763074	-0.702826	-0.611228	-0.599931
Ahnak	-0.32415	-0.406524	-0.187484	-0.572959	-0.175933	-0.110388	-0.676814	-0.671208	-0.718405	-0.682742	-0.502416	-0.295739	-0.278157	-0.164406	0.135678	0.00844284	0.0729649	0.274864	-0.422819	-0.366727	0.0586614	-0.0115022	-0.0378984	0.139814	0.164818	0.212607	0.458727	0.4669	0.650078	-0.0309838	0.212996	0.141601	0.449833	0.506802	0.566523	0.660887	0.42142	0.359702	0.317451	0.44	0.329943	0.299637	0.552021	0.547036	0.520998	0.506374	0.508067
Ahsa1	0.00283993	0.0294478	-0.184356	0.0478629	-0.439907	-0.398503	0.449794	0.755147	0.628491	0.725501	0.513059	0.476882	0.530957	-0.137947	-0.18122	0.0608294	0.130097	-0.121836	0.223162	0.434035	0.284531	0.509686	0.675492	0.476556	0.392991	0.0180459	0.10183	-0.288774	-0.385991	-0.00698236	-0.313403	-0.176755	-0.636446	-0.499206	-0.802625	-0.750209	-0.19303	-0.596406	-0.523361	-0.803311	-0.563115	-0.583491	-0.7185	-0.801741	-0.753119	-0.624419	-0.619149
Ahsa2	-0.0375236	0.0977097	-0.044083	0.30282	-0.173251	-0.0876024	0.398983	0.499378	0.613915	0.731333	0.66074	0.459335	0.593584	-0.278833	-0.454746	-0.261069	-0.178518	-0.381717	0.0663334	0.101065	0.150745	0.312295	0.209701	0.135318	0.12634	-0.155374	-0.199901	-0.256789	-0.46404	-0.0747283	-0.309612	-0.0434665	-0.650708	-0.615297	-0.657526	-0.688321	-0.0369401	-0.173791	-0.0628929	-0.528915	-0.407824	-0.347645	-0.541398	-0.512756	-0.345475	-0.407248	-0.338982
AI846148	0.14776	0.181754	-0.045833	0.235332	-0.216046	-0.227543	0.556517	0.759836	0.670806	0.707596	0.486735	0.402348	0.413247	0.0139985	-0.119776	0.0806513	0.0902599	-0.148089	0.333957	0.457156	0.157575	0.326079	0.473397	0.264032	0.194084	-0.0547575	-0.0934386	-0.371168	-0.48873	0.019831	-0.271273	-0.182472	-0.554968	-0.485594	-0.724674	-0.722689	-0.316053	-0.560545	-0.506479	-0.690375	-0.48752	-0.498473	-0.675366	-0.73793	-0.717244	-0.608177	-0.615609
Aimp2	0.170129	0.152957	-0.0788952	0.122932	-0.268532	-0.306772	0.523702	0.774033	0.596422	0.609462	0.353521	0.345143	0.312116	0.0993929	0.0267371	0.215417	0.208069	-0.0183521	0.377726	0.548075	0.175057	0.340235	0.583668	0.34502	0.253557	0.016934	0.0197454	-0.350291	-0.407264	0.0515528	-0.230495	-0.218353	-0.462607	-0.368566	-0.681009	-0.650878	-0.363856	-0.667767	-0.640611	-0.702488	-0.479779	-0.523293	-0.658018	-0.758357	-0.797349	-0.621739	-0.658093
Ak6	-0.02084	-0.00255196	-0.179206	0.0024899	-0.408256	-0.366152	0.356337	0.631297	0.514375	0.60436	0.426307	0.408209	0.458358	-0.136384	-0.154083	0.0546655	0.121722	-0.090559	0.170239	0.363799	0.260183	0.457784	0.604614	0.438499	0.365201	0.0311473	0.124015	-0.226447	-0.301085	-0.0086699	-0.266949	-0.148714	-0.540915	-0.413442	-0.681837	-0.62803	-0.143202	-0.510344	-0.447507	-0.691259	-0.483105	-0.503453	-0.607039	-0.682116	-0.639928	-0.525494	-0.520483
Akap7	-0.312861	-0.366737	-0.147154	-0.482847	-0.110947	-0.0396784	-0.643128	-0.679727	-0.673217	-0.634731	-0.436518	-0.27816	-0.244131	-0.185392	0.0675658	-0.0606029	0.00326028	0.201518	-0.428945	-0.412616	0.0282999	-0.0496778	-0.130826	0.0613193	0.100204	0.16253	0.366611	0.443148	0.590864	-0.0436339	0.19864	0.16027	0.414915	0.447491	0.557459	0.628555	0.427673	0.42414	0.393076	0.466391	0.339186	0.327857	0.55126	0.569986	0.571281	0.517622	0.532736
Akip1	0.155004	0.17845	-0.04233	0.216214	-0.204951	-0.224192	0.535919	0.734688	0.63432	0.66172	0.441875	0.372238	0.371866	0.0385772	-0.0839189	0.104429	0.106977	-0.119492	0.336384	0.458863	0.147652	0.30598	0.465028	0.257239	0.186587	-0.0433612	-0.0798784	-0.358277	-0.461165	0.0266898	-0.251026	-0.182871	-0.512125	-0.444594	-0.685009	-0.680694	-0.320623	-0.558079	-0.512235	-0.660533	-0.463594	-0.479777	-0.644558	-0.710776	-0.703826	-0.587299	-0.600693
Akr1c14	-0.220595	-0.213478	0.00744915	-0.210396	0.14304	0.199417	-0.537542	-0.718999	-0.580577	-0.568185	-0.330624	-0.293019	-0.247695	-0.151318	-0.0366577	-0.194348	-0.162554	0.0427798	-0.395647	-0.509305	-0.103573	-0.231794	-0.439095	-0.216059	-0.139599	0.0246952	0.0815577	0.364379	0.432913	-0.056481	0.199396	0.201374	0.402705	0.348558	0.601762	0.599476	0.387832	0.59215	0.572576	0.599984	0.412185	0.444837	0.593231	0.673011	0.71533	0.568314	0.604651
Aldh18a1	0.252067	0.238038	-0.00817434	0.225306	-0.158526	-0.226038	0.595922	0.800112	0.636586	0.618056	0.349714	0.315939	0.258861	0.183194	0.0607447	0.233087	0.193878	-0.0321848	0.448025	0.577398	0.113304	0.253521	0.495029	0.243471	0.15633	-0.0207241	-0.082413	-0.404427	-0.473608	0.0674536	-0.215024	-0.228186	-0.433135	-0.372018	-0.660272	-0.65577	-0.44022	-0.669606	-0.651791	-0.664161	-0.454341	-0.494346	-0.655123	-0.747754	-0.80299	-0.632113	-0.676428
Aldh1a3	-0.0236605	-0.139917	-0.0198595	-0.325886	0.0507548	-0.000331348	-0.367161	-0.406025	-0.519799	-0.593636	-0.535633	-0.3482	-0.443697	0.173986	0.355924	0.213915	0.168645	0.329173	-0.0932827	-0.0843725	-0.0722624	-0.181817	-0.0845516	-0.0222836	-0.0217786	0.159225	0.245423	0.241561	0.421917	0.052611	0.237979	0.0348939	0.503354	0.502482	0.506744	0.553145	0.0738419	0.119541	0.0349126	0.38492	0.302439	0.247642	0.424003	0.390097	0.260804	0.32326	0.270669
Aldh1l2	0.326003	0.274735	0.0226873	0.21051	-0.106017	-0.215525	0.606072	0.802871	0.586887	0.525084	0.229033	0.235993	0.127191	0.310741	0.201034	0.344754	0.268143	0.0600269	0.522319	0.651281	0.0735092	0.186007	0.492778	0.217051	0.119624	0.00632519	-0.0720574	-0.416511	-0.445244	0.102672	-0.162686	-0.255939	-0.321018	-0.269067	-0.585155	-0.579172	-0.522828	-0.730955	-0.742443	-0.618725	-0.41127	-0.47263	-0.615181	-0.727984	-0.84116	-0.627955	-0.699778
Aldoc	-0.10368	-0.190353	-0.0214857	-0.333375	0.0737757	0.0577236	-0.472819	-0.558659	-0.599965	-0.648112	-0.521159	-0.362107	-0.416477	0.0705611	0.254799	0.0946319	0.0749464	0.267523	-0.215132	-0.242009	-0.0827637	-0.207019	-0.203361	-0.0780513	-0.052094	0.134658	0.227947	0.315568	0.478128	0.0188586	0.24775	0.0966375	0.517925	0.502899	0.589595	0.627437	0.19839	0.29369	0.223601	0.493822	0.368361	0.337261	0.525785	0.526194	0.444029	0.442069	0.415349
Alg12	0.354252	0.415458	0.15801	0.546149	0.105886	0.0266194	0.745782	0.80092	0.786714	0.746928	0.513194	0.33385	0.296946	0.205174	-0.0816837	0.0733352	0.0037876	-0.230901	0.495229	0.486507	-0.0196169	0.0780704	0.178461	-0.0477428	-0.0956185	-0.181827	-0.408342	-0.513011	-0.683171	0.049565	-0.237257	-0.189328	-0.494686	-0.52528	-0.663731	-0.74143	-0.492577	-0.506708	-0.468923	-0.561708	-0.407336	-0.395929	-0.653581	-0.678916	-0.679298	-0.612057	-0.6294
Alg3	0.0777499	0.135942	-0.0907816	0.21891	-0.293756	-0.268768	0.544774	0.775018	0.71226	0.78875	0.582481	0.477312	0.530013	-0.0958233	-0.225849	0.0052658	0.0499558	-0.208157	0.273848	0.415045	0.209097	0.409487	0.520183	0.323678	0.256595	-0.0616242	-0.0694333	-0.35792	-0.501567	-0.0075559	-0.319405	-0.167408	-0.655979	-0.567426	-0.804571	-0.794984	-0.247952	-0.539136	-0.461194	-0.755742	-0.540248	-0.538917	-0.72493	-0.779106	-0.714852	-0.627928	-0.615174
Alg8	0.159531	0.166713	-0.0858914	0.17359	-0.295305	-0.317327	0.584223	0.848135	0.694107	0.728076	0.464485	0.420658	0.41235	0.0471699	-0.0549769	0.16477	0.172532	-0.0857996	0.381817	0.555518	0.199147	0.390194	0.610826	0.363534	0.27215	-0.0106911	-0.0152781	-0.388927	-0.481596	0.0371482	-0.281398	-0.221904	-0.56997	-0.471098	-0.785412	-0.761096	-0.362923	-0.68615	-0.639689	-0.783763	-0.54357	-0.575593	-0.742031	-0.835462	-0.843814	-0.682445	-0.705901
Alox5	0.0282218	0.207945	0.0655464	0.499533	0.00578835	0.0814391	0.478351	0.476827	0.685906	0.785693	0.742087	0.45305	0.596349	-0.25659	-0.532551	-0.35801	-0.297661	-0.49786	0.0912903	0.0340243	0.0583361	0.18569	-0.00712377	-0.060542	-0.042998	-0.254761	-0.404505	-0.315598	-0.581006	-0.0843766	-0.311968	-0.0149429	-0.665447	-0.691353	-0.632474	-0.715729	-0.0662982	-0.0567494	0.0632655	-0.439277	-0.359968	-0.268063	-0.517041	-0.444869	-0.247109	-0.375545	-0.291686
Alox5ap	0.077882	0.205774	0.0642634	0.417879	0.00986093	0.0468705	0.448266	0.464631	0.594897	0.655709	0.582481	0.363399	0.451861	-0.136148	-0.364955	-0.218974	-0.189548	-0.365851	0.148414	0.115293	0.0422076	0.147423	0.0432387	-0.0347499	-0.0335887	-0.195762	-0.328963	-0.299057	-0.502846	-0.0467568	-0.251074	-0.0461826	-0.532793	-0.551138	-0.544121	-0.609928	-0.130911	-0.137775	-0.051423	-0.401339	-0.317467	-0.256307	-0.465093	-0.424604	-0.29473	-0.363581	-0.3118
Alox8	0.0550935	-0.0427293	0.0815703	-0.18363	0.221758	0.14533	-0.31753	-0.446752	-0.504965	-0.612262	-0.537612	-0.399744	-0.510306	0.245174	0.357413	0.181782	0.102773	0.280811	-0.0526	-0.120695	-0.167353	-0.321079	-0.27237	-0.197095	-0.177706	0.0936116	0.0905473	0.201552	0.356638	0.0592439	0.266843	0.051526	0.556672	0.501114	0.581311	0.586684	0.0255849	0.20408	0.112565	0.497042	0.374022	0.335685	0.481568	0.475612	0.345301	0.369378	0.317738
Amz2	0.106079	0.0424995	0.184042	-0.0295236	0.4005	0.313498	-0.291136	-0.527089	-0.497989	-0.626535	-0.512183	-0.442437	-0.549144	0.27178	0.307094	0.0967631	-0.00499501	0.195834	-0.0524774	-0.211707	-0.264085	-0.463215	-0.501838	-0.392874	-0.345124	0.0118751	-0.0821264	0.178423	0.294055	0.051366	0.289703	0.0895222	0.594994	0.479148	0.665982	0.624939	0.01962	0.348308	0.258683	0.634165	0.457904	0.447121	0.559468	0.595685	0.486989	0.446148	0.407136
Anapc1	0.0978571	0.132502	-0.0920517	0.179174	-0.292011	-0.283874	0.526409	0.763943	0.666216	0.725407	0.507537	0.434715	0.463066	-0.0430474	-0.150274	0.0668743	0.098071	-0.14768	0.296191	0.447964	0.201654	0.391302	0.5408	0.334889	0.260872	-0.0342245	-0.0334203	-0.347168	-0.462171	0.00896884	-0.290424	-0.180036	-0.593031	-0.501091	-0.760218	-0.742447	-0.273694	-0.571627	-0.509035	-0.734508	-0.518178	-0.530623	-0.697005	-0.765083	-0.731215	-0.618225	-0.619707
Anapc7	-0.11715	-0.194245	-0.00398159	-0.320556	0.114863	0.104341	-0.511863	-0.631654	-0.641862	-0.689914	-0.534501	-0.387986	-0.434341	0.0543397	0.232576	0.0552819	0.0365576	0.24863	-0.252181	-0.305145	-0.106301	-0.24737	-0.281259	-0.130027	-0.0919113	0.119513	0.20162	0.341426	0.499297	0.0103618	0.264354	0.121872	0.549543	0.51958	0.64847	0.677379	0.23431	0.372516	0.303273	0.564417	0.4141	0.392265	0.585195	0.6013	0.530655	0.50179	0.482287
Ang4	-0.00235051	0.111967	-0.0568902	0.284059	-0.208565	-0.140312	0.448382	0.587272	0.651362	0.75754	0.64588	0.469746	0.58117	-0.226701	-0.392353	-0.185584	-0.113813	-0.335701	0.129702	0.195336	0.168502	0.342973	0.301823	0.190303	0.164205	-0.130518	-0.16615	-0.290891	-0.482269	-0.0555608	-0.316035	-0.0806872	-0.659764	-0.608965	-0.70857	-0.728405	-0.101098	-0.283508	-0.181119	-0.601461	-0.451349	-0.407662	-0.602103	-0.597313	-0.458602	-0.477489	-0.424873
Angptl6	-0.255689	-0.183346	-0.246585	-0.11166	-0.460066	-0.322393	0.071504	0.292947	0.30632	0.474714	0.4474	0.399214	0.551512	-0.415673	-0.380045	-0.196032	-0.0499077	-0.194803	-0.139531	0.019321	0.293196	0.481457	0.444275	0.417596	0.391483	0.0191543	0.186173	-0.024073	-0.119591	-0.0895934	-0.256225	-0.0152376	-0.527532	-0.398824	-0.523522	-0.46282	0.177033	-0.156743	-0.0581181	-0.499105	-0.367327	-0.344457	-0.396428	-0.410321	-0.26169	-0.270912	-0.207941
Ankrd22	0.0511113	-0.149087	-0.0374945	-0.465992	0.0253128	-0.0845784	-0.399186	-0.388929	-0.63982	-0.769924	-0.77055	-0.468062	-0.648722	0.357438	0.61869	0.443777	0.354036	0.540639	0.00618073	0.0691297	-0.0787417	-0.210817	0.0406942	0.0533686	0.0222753	0.260151	0.383271	0.258221	0.535669	0.112653	0.320307	-0.024749	0.685463	0.706906	0.608233	0.688147	-0.0358356	-0.0443188	-0.179608	0.402159	0.340748	0.23414	0.47162	0.38074	0.143929	0.311267	0.206975
Ankrd34b	0.140867	0.219224	0.0334223	0.352236	-0.0628588	-0.0620091	0.51615	0.608569	0.630511	0.66588	0.5163	0.361591	0.39979	-0.0261079	-0.219122	-0.056149	-0.0492615	-0.251385	0.262949	0.29389	0.0759184	0.200545	0.224542	0.0782875	0.0454213	-0.133435	-0.239298	-0.346491	-0.505736	-0.00620367	-0.248204	-0.116691	-0.51759	-0.503661	-0.611084	-0.650523	-0.247993	-0.346063	-0.281819	-0.520232	-0.383997	-0.359403	-0.555808	-0.565221	-0.499753	-0.479313	-0.461607
Anks1	-0.187357	-0.128341	-0.252053	-0.0754679	-0.503734	-0.38877	0.210957	0.488656	0.445949	0.603869	0.504778	0.462413	0.591335	-0.351333	-0.33512	-0.112809	0.0192108	-0.177504	-0.0204993	0.176922	0.321173	0.541324	0.580921	0.48761	0.436547	0.0267288	0.184398	-0.119207	-0.219872	-0.0664858	-0.299061	-0.0774363	-0.611875	-0.465053	-0.672294	-0.606052	0.0588172	-0.338493	-0.241306	-0.659068	-0.473625	-0.466621	-0.549921	-0.593145	-0.470224	-0.425555	-0.379254
Anxa11	0.0042273	-0.10657	0.072033	-0.271132	0.239426	0.170198	-0.463047	-0.622828	-0.672267	-0.782421	-0.658201	-0.488474	-0.599661	0.22961	0.389334	0.171425	0.0963557	0.329047	-0.140704	-0.222537	-0.186514	-0.372515	-0.347941	-0.225047	-0.192859	0.121345	0.146115	0.299942	0.489828	0.0538084	0.327872	0.0917651	0.682845	0.621738	0.743441	0.757007	0.110747	0.321178	0.217319	0.642264	0.478417	0.438801	0.634511	0.637429	0.501016	0.507604	0.456959
Anxa7	-0.125431	-0.186088	0.00511542	-0.285781	0.128906	0.127478	-0.501018	-0.634362	-0.616733	-0.656458	-0.490249	-0.36786	-0.399647	0.0254185	0.184615	0.0120148	-0.000637013	0.206872	-0.266522	-0.333427	-0.110234	-0.24924	-0.313433	-0.153216	-0.108506	0.0970966	0.167026	0.334631	0.472961	-4.49e-05	0.250157	0.132994	0.517678	0.480656	0.63185	0.652239	0.250114	0.405177	0.344901	0.565437	0.409631	0.398127	0.577501	0.605368	0.554218	0.50446	0.494352
Ap1s1	-0.10872	-0.0409714	-0.22361	0.0324508	-0.4919	-0.396012	0.375044	0.673302	0.617395	0.76581	0.610013	0.535632	0.65317	-0.300848	-0.34137	-0.0833741	0.0329784	-0.21674	0.093632	0.296539	0.32251	0.566534	0.63919	0.491533	0.426947	-0.00548623	0.108365	-0.231957	-0.364956	-0.0528766	-0.350733	-0.124141	-0.718682	-0.574239	-0.822496	-0.76964	-0.054709	-0.46625	-0.362449	-0.792537	-0.568581	-0.562479	-0.699266	-0.752683	-0.634829	-0.567569	-0.527679
Apba3	0.207763	0.315189	0.143539	0.510583	0.127468	0.110015	0.551247	0.53502	0.636519	0.642938	0.526847	0.308314	0.341588	0.0235865	-0.24772	-0.123133	-0.146018	-0.324269	0.279743	0.218378	-0.0286098	0.0464362	-0.0062632	-0.124461	-0.130768	-0.213294	-0.415905	-0.376501	-0.570542	-0.00794191	-0.218641	-0.084534	-0.464906	-0.513725	-0.519131	-0.605968	-0.272035	-0.214863	-0.153175	-0.379187	-0.295784	-0.246728	-0.476384	-0.446689	-0.368877	-0.40653	-0.380725
Apeh	0.231016	0.3122	0.0863033	0.460073	0.00189733	-0.0259462	0.642823	0.723582	0.740074	0.750811	0.561242	0.380388	0.395754	0.0544465	-0.192842	-0.0207466	-0.0414856	-0.271054	0.367132	0.381236	0.043004	0.166131	0.213658	0.0288088	-0.0104197	-0.166919	-0.329816	-0.436198	-0.615408	0.0123528	-0.264343	-0.149909	-0.55179	-0.55598	-0.677016	-0.736123	-0.355563	-0.423424	-0.362816	-0.571205	-0.420129	-0.396358	-0.633231	-0.646461	-0.597141	-0.56249	-0.554786
Aplp2	-0.226822	-0.21867	0.0237164	-0.212148	0.183025	0.238952	-0.58185	-0.793429	-0.637199	-0.630659	-0.36962	-0.332779	-0.288134	-0.148821	-0.031873	-0.210928	-0.18282	0.0456498	-0.423835	-0.558887	-0.128728	-0.276863	-0.506897	-0.262068	-0.176294	0.0197226	0.068965	0.393249	0.467272	-0.0589714	0.225489	0.221371	0.455099	0.387798	0.674023	0.666034	0.413761	0.656958	0.632877	0.675458	0.463981	0.500771	0.660333	0.750405	0.793304	0.629402	0.667769
Apob	-0.136185	-0.110513	0.121091	-0.0603862	0.338383	0.36622	-0.497651	-0.784276	-0.583431	-0.60985	-0.34862	-0.362422	-0.33514	-0.070438	-0.0286535	-0.229419	-0.235881	-0.00443574	-0.35818	-0.559983	-0.213444	-0.395479	-0.658773	-0.416307	-0.317392	-0.0454929	-0.0862761	0.330048	0.374821	-0.0489231	0.239668	0.223991	0.478896	0.362441	0.705103	0.657608	0.341354	0.699	0.66973	0.743101	0.505131	0.555731	0.675732	0.787531	0.826877	0.635596	0.672566
Ar	-0.0933645	-0.115876	0.0403994	-0.149892	0.163267	0.168238	-0.377264	-0.524268	-0.459662	-0.488492	-0.33623	-0.281672	-0.291395	-0.00123491	0.0849778	-0.0557729	-0.0658751	0.0993372	-0.224161	-0.314995	-0.116662	-0.236379	-0.340121	-0.195973	-0.146657	0.032653	0.0514788	0.250942	0.330247	-0.0123626	0.189393	0.125939	0.387084	0.334827	0.504471	0.499752	0.211099	0.390105	0.351897	0.483477	0.341003	0.349455	0.468575	0.513385	0.497989	0.420867	0.425505
Arf1	-0.12376	-0.0704086	-0.245637	-0.0230041	-0.52294	-0.42741	0.338246	0.65312	0.574046	0.722176	0.565435	0.517591	0.628801	-0.297137	-0.308593	-0.0549799	0.0635188	-0.177517	0.081941	0.30235	0.336033	0.580374	0.674152	0.526846	0.457609	0.0218091	0.160552	-0.206422	-0.318735	-0.0486676	-0.33713	-0.126748	-0.688141	-0.53226	-0.798335	-0.733063	-0.0432001	-0.47943	-0.381776	-0.786965	-0.560191	-0.562781	-0.67921	-0.74227	-0.636589	-0.554165	-0.519735
Arfgap3	-0.164575	-0.156525	0.0555734	-0.143558	0.21859	0.254363	-0.491358	-0.704544	-0.557839	-0.567808	-0.3384	-0.316252	-0.288412	-0.0920531	-0.00967308	-0.179819	-0.170312	0.0366931	-0.348099	-0.489538	-0.14641	-0.292681	-0.500043	-0.285447	-0.206118	0.000579642	0.014183	0.329456	0.391438	-0.0449996	0.212208	0.194779	0.427603	0.351007	0.62049	0.601172	0.335945	0.591438	0.564623	0.629473	0.432228	0.466671	0.598914	0.683517	0.713341	0.563911	0.594217
Arfip2	0.18702	0.154296	-0.0503906	0.104182	-0.202758	-0.257526	0.462677	0.674288	0.495473	0.484492	0.248436	0.259666	0.204966	0.151572	0.0924102	0.241619	0.215762	0.0279255	0.366839	0.512634	0.129945	0.258804	0.50147	0.282108	0.197962	0.0260423	0.0175153	-0.31229	-0.342779	0.0624482	-0.174101	-0.203339	-0.346082	-0.270374	-0.553873	-0.528167	-0.359085	-0.609226	-0.600214	-0.586037	-0.394472	-0.442379	-0.551692	-0.648158	-0.71068	-0.538066	-0.583246
Arhgap18	-0.155431	-0.169776	0.0659753	-0.190262	0.252597	0.272993	-0.556314	-0.788731	-0.66013	-0.690995	-0.449675	-0.394925	-0.390374	-0.0423956	0.0675087	-0.136079	-0.141612	0.0998723	-0.357267	-0.506575	-0.174486	-0.349126	-0.54005	-0.312973	-0.231745	0.0249446	0.04337	0.370986	0.467198	-0.0320172	0.265062	0.202175	0.53851	0.454445	0.732723	0.717435	0.33993	0.622013	0.57625	0.721008	0.502488	0.527139	0.690994	0.771377	0.77273	0.632982	0.651667
Arhgef9	-0.37377	-0.387099	-0.185406	-0.44693	-0.190345	-0.0774181	-0.596682	-0.602532	-0.553851	-0.467206	-0.264483	-0.154676	-0.0671238	-0.31395	-0.0860347	-0.163767	-0.0604702	0.0945365	-0.469941	-0.438534	0.0870012	0.0554872	-0.0748221	0.119556	0.161061	0.131211	0.350215	0.417682	0.513102	-0.0771572	0.117099	0.168817	0.243163	0.293489	0.404771	0.475573	0.479075	0.425541	0.429739	0.346219	0.243457	0.252072	0.439489	0.471327	0.533078	0.449105	0.491094
Arid2	-0.290616	-0.300862	-0.0643512	-0.337042	0.0335107	0.109087	-0.620796	-0.751393	-0.648301	-0.614643	-0.371782	-0.289185	-0.23442	-0.203552	-0.0252061	-0.174808	-0.119173	0.0931207	-0.452512	-0.518561	-0.0459709	-0.155515	-0.337343	-0.107161	-0.0392744	0.0790271	0.205828	0.424993	0.52302	-0.0624468	0.201205	0.203499	0.410803	0.391802	0.607285	0.635677	0.448745	0.574005	0.554567	0.573897	0.399672	0.420471	0.606772	0.670371	0.710651	0.584207	0.61993
Arid4a	-0.0854599	-0.101671	0.0932024	-0.118754	0.274278	0.272438	-0.442927	-0.664367	-0.555151	-0.602196	-0.404788	-0.36354	-0.377991	0.0200398	0.0934906	-0.0926969	-0.117301	0.0925955	-0.263854	-0.410646	-0.183489	-0.348639	-0.503952	-0.318487	-0.248311	0.0081384	-0.00779815	0.291892	0.37467	-0.0151846	0.241929	0.164989	0.491449	0.403036	0.648781	0.624216	0.24503	0.52398	0.476272	0.642483	0.448817	0.468501	0.599824	0.6694	0.654866	0.538892	0.547357
Arl3	-0.17965	-0.0262629	-0.10774	0.193417	-0.246414	-0.106909	0.228109	0.325793	0.486605	0.650725	0.653696	0.457561	0.644556	-0.434559	-0.557427	-0.371554	-0.240915	-0.409497	-0.10527	-0.0658945	0.192054	0.357704	0.17908	0.17372	0.183276	-0.137339	-0.115978	-0.134692	-0.339165	-0.115793	-0.304272	0.0205732	-0.64192	-0.590351	-0.581287	-0.595331	0.141454	-0.0147328	0.113355	-0.450389	-0.359249	-0.283742	-0.436668	-0.386158	-0.169108	-0.280436	-0.18489
Armcx6	0.0936947	0.165256	-0.0250785	0.278222	-0.163149	-0.145279	0.494688	0.639556	0.634112	0.691612	0.532489	0.400767	0.451376	-0.0748803	-0.232277	-0.0463092	-0.0179129	-0.233816	0.238782	0.313377	0.132951	0.285907	0.333137	0.179191	0.135964	-0.100244	-0.156365	-0.327979	-0.477911	-0.0123502	-0.271269	-0.125773	-0.562031	-0.516622	-0.666266	-0.683325	-0.218819	-0.394148	-0.323215	-0.59327	-0.432271	-0.415156	-0.598358	-0.622241	-0.551457	-0.512017	-0.492774
Arpc4	0.113227	0.149984	-0.0566428	0.205105	-0.222064	-0.222042	0.50089	0.695458	0.619897	0.664881	0.46764	0.386957	0.408426	-0.0186313	-0.137046	0.054185	0.0732582	-0.149028	0.286139	0.405155	0.159699	0.322569	0.448113	0.260964	0.19762	-0.0495852	-0.0738201	-0.33242	-0.44538	0.0105317	-0.260077	-0.162244	-0.532568	-0.462803	-0.681747	-0.676685	-0.267523	-0.506027	-0.45036	-0.647861	-0.459015	-0.466195	-0.62838	-0.683823	-0.653418	-0.559077	-0.56049
Arv1	0.0296899	-0.0556908	0.0847214	-0.177703	0.235263	0.170965	-0.349168	-0.497741	-0.527042	-0.625549	-0.526514	-0.402538	-0.497954	0.208979	0.317578	0.135942	0.0653538	0.25356	-0.0933762	-0.17693	-0.173551	-0.332785	-0.320061	-0.22267	-0.193604	0.0808351	0.0762323	0.223708	0.369575	0.0469053	0.268627	0.0736144	0.558017	0.495557	0.607577	0.607973	0.0672757	0.267442	0.181802	0.53522	0.396479	0.367735	0.514895	0.522461	0.410292	0.409485	0.367649
Asah2	-0.0209421	-0.0403816	0.11909	-0.0565941	0.297112	0.273871	-0.34443	-0.557655	-0.467114	-0.53049	-0.372032	-0.340905	-0.374347	0.0805947	0.122636	-0.0502927	-0.0934344	0.0903291	-0.179522	-0.324912	-0.194073	-0.352825	-0.474819	-0.326189	-0.265836	-0.00564103	-0.0528	0.222891	0.295826	0.00106024	0.224839	0.131822	0.456903	0.363781	0.580929	0.548061	0.158944	0.437506	0.386642	0.578217	0.405425	0.419962	0.52389	0.583464	0.552455	0.458606	0.45696
Asf1b	0.168216	0.129924	-0.104367	0.0634297	-0.310479	-0.355215	0.505955	0.785642	0.568162	0.576933	0.305643	0.331499	0.284362	0.121381	0.0800691	0.269131	0.260003	0.0353241	0.388907	0.5868	0.194145	0.36413	0.649358	0.397979	0.296059	0.0517289	0.0813886	-0.33792	-0.369542	0.0623373	-0.219714	-0.233939	-0.436525	-0.326181	-0.675797	-0.629973	-0.375497	-0.71893	-0.700658	-0.722591	-0.487008	-0.544628	-0.660154	-0.778088	-0.838788	-0.633608	-0.680697
Ash2l	0.0163249	-0.142214	-0.0338587	-0.394694	0.0249183	-0.0555682	-0.367487	-0.371705	-0.560044	-0.660167	-0.639616	-0.394576	-0.532535	0.265286	0.485777	0.334586	0.268177	0.433772	-0.0334662	0.00957282	-0.0672004	-0.181299	0.000857524	0.0307658	0.0123002	0.211149	0.318043	0.23963	0.466541	0.0835638	0.270225	-0.00185111	0.576486	0.591101	0.532701	0.597661	0.00966382	0.0153387	-0.0931075	0.367774	0.303898	0.221807	0.424712	0.358838	0.175525	0.296176	0.217004
Asns	0.178588	0.167654	-0.0589509	0.150307	-0.232572	-0.272732	0.52395	0.75217	0.59198	0.600648	0.35418	0.333534	0.301147	0.104353	0.0181732	0.198508	0.186736	-0.0332859	0.374879	0.526783	0.155246	0.310312	0.535819	0.305398	0.219947	0.00181294	-0.012392	-0.351511	-0.414998	0.0498806	-0.223798	-0.209536	-0.450518	-0.368575	-0.658619	-0.637361	-0.362278	-0.635433	-0.608382	-0.670388	-0.459581	-0.497745	-0.637345	-0.729102	-0.764149	-0.601861	-0.635743
Atad2	0.0745428	0.0721979	-0.141782	0.053526	-0.365257	-0.362836	0.45616	0.737551	0.577181	0.632007	0.402866	0.394597	0.402741	-0.0200825	-0.0611944	0.148017	0.180465	-0.0494298	0.28589	0.482171	0.233466	0.425459	0.635776	0.422335	0.334345	0.0314384	0.0879411	-0.298557	-0.363713	0.0232394	-0.260158	-0.194178	-0.524184	-0.404426	-0.715046	-0.667844	-0.264234	-0.624643	-0.578214	-0.735359	-0.507104	-0.542619	-0.663961	-0.758631	-0.759131	-0.60288	-0.6204
Atf3	0.21	0.175643	-0.0452855	0.124556	-0.203649	-0.265655	0.504419	0.725244	0.535957	0.520555	0.266454	0.274968	0.213766	0.171868	0.102154	0.260079	0.228667	0.0274519	0.401069	0.552019	0.131664	0.266707	0.525794	0.289476	0.200001	0.0229347	0.00580998	-0.341104	-0.375596	0.0685977	-0.184868	-0.218747	-0.367709	-0.290721	-0.591014	-0.566728	-0.393467	-0.652078	-0.64338	-0.62301	-0.4195	-0.470191	-0.590656	-0.692819	-0.761365	-0.577462	-0.62663
Atg13	0.00803577	0.194087	0.0864951	0.497445	0.0609947	0.14161	0.406225	0.358598	0.602305	0.698715	0.695859	0.40074	0.549817	-0.269827	-0.543209	-0.398589	-0.338939	-0.504875	0.036504	-0.0540252	0.0243767	0.124088	-0.112903	-0.128676	-0.0951642	-0.26561	-0.424515	-0.267825	-0.529558	-0.0929696	-0.277578	0.0202851	-0.597267	-0.642402	-0.52811	-0.620263	-0.0139534	0.0534389	0.170165	-0.326275	-0.283917	-0.182806	-0.41615	-0.32525	-0.119024	-0.279454	-0.188802
Atg3	0.0160204	0.0392073	-0.128011	0.0599645	-0.317125	-0.289377	0.361077	0.586208	0.494767	0.564841	0.400296	0.364701	0.403865	-0.0947677	-0.139612	0.0445131	0.0928698	-0.101758	0.182875	0.336101	0.207487	0.376689	0.500188	0.345723	0.282973	0.00417268	0.0554315	-0.233208	-0.312843	-0.00382755	-0.24048	-0.13654	-0.489101	-0.390257	-0.616763	-0.582134	-0.160574	-0.455642	-0.399908	-0.611824	-0.42981	-0.443542	-0.554044	-0.615263	-0.578247	-0.482636	-0.478814
Atg7	-0.182225	-0.327397	-0.105071	-0.576094	-0.0285298	-0.0426889	-0.67699	-0.718322	-0.83901	-0.889995	-0.742143	-0.471591	-0.549483	0.0773597	0.389667	0.192556	0.18219	0.433188	-0.300077	-0.270872	-0.0440197	-0.183373	-0.115166	0.0347569	0.0502464	0.246715	0.443076	0.455919	0.710409	0.0316145	0.327322	0.106936	0.69116	0.714404	0.757365	0.843892	0.281147	0.30374	0.205186	0.586154	0.450584	0.387423	0.673934	0.643903	0.514444	0.558702	0.512602
Atp2a2	0.0367516	0.0288	-0.17576	-0.00454515	-0.416163	-0.402174	0.413091	0.716065	0.544118	0.611101	0.388164	0.398144	0.413922	-0.0522964	-0.064427	0.148578	0.194186	-0.0316765	0.252346	0.468986	0.260669	0.46144	0.677522	0.470776	0.380239	0.0545485	0.143986	-0.267186	-0.320753	0.0180085	-0.260467	-0.189739	-0.523177	-0.387602	-0.711205	-0.650317	-0.228468	-0.623716	-0.575732	-0.744046	-0.511319	-0.550633	-0.654581	-0.754619	-0.752319	-0.590626	-0.606505
Atp5k	0.0919003	0.164201	-0.00462052	0.28086	-0.116054	-0.100514	0.452176	0.563643	0.576622	0.626075	0.490366	0.35722	0.405376	-0.0668662	-0.223987	-0.0612647	-0.0386107	-0.230293	0.213706	0.264267	0.103575	0.234409	0.258826	0.12657	0.0930596	-0.10676	-0.173915	-0.30067	-0.444952	-0.0137608	-0.24286	-0.105851	-0.504969	-0.474801	-0.589484	-0.613596	-0.196465	-0.327853	-0.262388	-0.512739	-0.376892	-0.355603	-0.52818	-0.541305	-0.471396	-0.44913	-0.428495
Atp5s	0.0443793	-0.0191981	0.159108	-0.0969185	0.380435	0.312336	-0.394216	-0.639119	-0.595249	-0.710315	-0.557463	-0.473215	-0.564468	0.219072	0.288903	0.0621816	-0.0232461	0.20665	-0.134869	-0.295302	-0.2561	-0.464267	-0.531975	-0.386408	-0.329304	0.029075	-0.0331564	0.250212	0.379929	0.0373661	0.312266	0.121924	0.641188	0.529706	0.74388	0.711884	0.103148	0.433605	0.344718	0.705483	0.507181	0.499848	0.64281	0.687652	0.591148	0.530928	0.500111
Atp6v0a2	0.172794	0.231518	0.0743014	0.340227	0.0250093	0.00165194	0.455628	0.499741	0.518123	0.520592	0.390151	0.257682	0.265763	0.0491321	-0.13277	-0.0174888	-0.0369635	-0.194672	0.262699	0.262158	0.0167285	0.0964084	0.123821	-0.00377345	-0.0287385	-0.125067	-0.251036	-0.31009	-0.438138	0.00993836	-0.180047	-0.102753	-0.376731	-0.38714	-0.461738	-0.508522	-0.255742	-0.284962	-0.243923	-0.383151	-0.283166	-0.264603	-0.433879	-0.439587	-0.40598	-0.386458	-0.381279
Atp6v0a4	0.287919	0.406592	0.225097	0.633303	0.257483	0.213702	0.621976	0.544693	0.677873	0.654028	0.535217	0.278678	0.293594	0.0978649	-0.233819	-0.128712	-0.182755	-0.357735	0.34012	0.224804	-0.100325	-0.0546727	-0.128614	-0.251283	-0.247947	-0.264196	-0.541444	-0.429837	-0.644613	0.00318801	-0.203508	-0.0851815	-0.437764	-0.5271	-0.489578	-0.60839	-0.338539	-0.187253	-0.132062	-0.322286	-0.260071	-0.201588	-0.462351	-0.416834	-0.346646	-0.402759	-0.380384
Atpaf2	0.233736	0.268793	0.0451925	0.339144	-0.0607735	-0.106727	0.592473	0.719806	0.657145	0.652082	0.437227	0.329138	0.309987	0.114356	-0.0681418	0.0934888	0.0633991	-0.152097	0.387942	0.449036	0.0670836	0.189196	0.319436	0.11432	0.0564418	-0.0962058	-0.210399	-0.402434	-0.524318	0.0371201	-0.227086	-0.176947	-0.467309	-0.444928	-0.631247	-0.661003	-0.379107	-0.508936	-0.471165	-0.578224	-0.410448	-0.415805	-0.608177	-0.655093	-0.655708	-0.563289	-0.579503
AU021092	0.035251	-0.0848684	0.077706	-0.26207	0.240462	0.157982	-0.425592	-0.574172	-0.645541	-0.766251	-0.664376	-0.487162	-0.613237	0.268599	0.424395	0.210602	0.125062	0.348159	-0.0976249	-0.171258	-0.187965	-0.371485	-0.317511	-0.215139	-0.190597	0.126662	0.144676	0.273405	0.46842	0.0656776	0.326561	0.0718063	0.68174	0.622632	0.720333	0.734805	0.0663267	0.266847	0.157534	0.61199	0.460432	0.41352	0.603952	0.596613	0.443924	0.470482	0.411019
Avl9	-0.243127	-0.289772	-0.0624976	-0.3809	0.0351409	0.0800779	-0.616229	-0.728732	-0.685916	-0.681392	-0.46971	-0.340876	-0.327386	-0.109393	0.0949703	-0.0687138	-0.0374066	0.183024	-0.392991	-0.439182	-0.0555905	-0.176333	-0.287613	-0.0844929	-0.0310696	0.117612	0.250809	0.41898	0.556692	-0.033096	0.236111	0.172813	0.487985	0.475109	0.644795	0.684371	0.384052	0.492522	0.449963	0.576997	0.413255	0.411346	0.618414	0.656861	0.647208	0.568362	0.579795
AW549877	-0.277951	-0.271234	-0.0357912	-0.276634	0.0790208	0.155852	-0.595048	-0.753304	-0.61791	-0.58478	-0.332684	-0.280316	-0.217612	-0.209868	-0.0628643	-0.213849	-0.160846	0.0489559	-0.450569	-0.54261	-0.0678773	-0.183497	-0.39728	-0.159902	-0.0836951	0.0469454	0.144491	0.406644	0.482852	-0.0686925	0.19346	0.213437	0.391556	0.356048	0.602281	0.615234	0.446475	0.610698	0.597234	0.590956	0.406103	0.438244	0.605442	0.68337	0.738533	0.589075	0.632079
Azi2	0.0796262	0.0536965	0.226566	0.0450968	0.486464	0.418778	-0.327486	-0.634615	-0.519797	-0.638098	-0.467934	-0.452493	-0.528112	0.211762	0.208058	-0.0211666	-0.114694	0.107679	-0.122322	-0.341647	-0.307336	-0.529208	-0.665669	-0.507189	-0.43217	-0.0444556	-0.175937	0.202679	0.2827	0.025089	0.294112	0.141308	0.596437	0.446948	0.728125	0.660421	0.0895822	0.508793	0.432739	0.739634	0.51889	0.536538	0.634169	0.710393	0.645391	0.535426	0.519865
B3gnt6	0.282562	0.42931	0.227044	0.700115	0.245324	0.217021	0.688943	0.616872	0.781504	0.77722	0.653048	0.353794	0.394272	0.0472213	-0.322179	-0.187538	-0.228222	-0.43488	0.346087	0.226562	-0.0837571	-0.0150046	-0.119291	-0.248818	-0.2432	-0.300026	-0.593274	-0.473244	-0.728557	-0.0120779	-0.25468	-0.0863221	-0.546503	-0.63603	-0.592005	-0.720941	-0.339829	-0.195862	-0.120566	-0.39623	-0.319974	-0.247353	-0.544382	-0.488339	-0.3849	-0.460818	-0.42421
B3gnt7	-0.305401	-0.42878	-0.234088	-0.664739	-0.264237	-0.217229	-0.661474	-0.585775	-0.720839	-0.695734	-0.565879	-0.297817	-0.312207	-0.105706	0.242564	0.129007	0.186058	0.373583	-0.364312	-0.247246	0.101688	0.0507911	0.122403	0.255899	0.254415	0.275682	0.565749	0.456943	0.682339	-0.00476152	0.217098	0.0939045	0.466311	0.557881	0.525414	0.649031	0.362454	0.210334	0.152345	0.351199	0.281528	0.221484	0.496817	0.451502	0.379492	0.434101	0.411733
B630005N14Rik	-0.328524	-0.395888	-0.171412	-0.536899	-0.147335	-0.0754607	-0.674345	-0.690885	-0.708143	-0.668315	-0.473197	-0.28951	-0.260514	-0.184784	0.096237	-0.0331131	0.0341026	0.237795	-0.438734	-0.402652	0.0454295	-0.0292952	-0.088385	0.10206	0.135494	0.189396	0.419232	0.46514	0.631697	-0.0399576	0.207827	0.155948	0.436388	0.481967	0.57111	0.655066	0.437728	0.40486	0.36891	0.462009	0.340416	0.320505	0.562237	0.570696	0.561191	0.523532	0.533626
Bach1	0.15758	0.0127893	0.152904	-0.188553	0.356241	0.219602	-0.345793	-0.528311	-0.631493	-0.807527	-0.742938	-0.556798	-0.739728	0.428574	0.552187	0.310815	0.173301	0.402659	0.0221016	-0.0788432	-0.259599	-0.477535	-0.371056	-0.303316	-0.2855	0.116944	0.0724703	0.211669	0.424288	0.104896	0.369149	0.0376423	0.77103	0.682366	0.76971	0.766031	-0.0636851	0.20135	0.0645775	0.65331	0.49668	0.435941	0.614872	0.596131	0.38809	0.446502	0.360026
Bag3	0.164794	0.168689	-0.0541955	0.174658	-0.223998	-0.253879	0.524934	0.741427	0.607131	0.625073	0.391332	0.350437	0.332926	0.0724031	-0.0274306	0.156462	0.152119	-0.0700719	0.354477	0.494696	0.153793	0.310749	0.506841	0.287388	0.208446	-0.0163904	-0.0378377	-0.351412	-0.431353	0.0390845	-0.235533	-0.196993	-0.477025	-0.400351	-0.668919	-0.654121	-0.340317	-0.599958	-0.564486	-0.665584	-0.460928	-0.489576	-0.638725	-0.719422	-0.735546	-0.593406	-0.618006
Bak1	0.188116	0.193276	-0.0453727	0.203309	-0.218675	-0.254956	0.568871	0.79026	0.6511	0.665109	0.415582	0.367248	0.34512	0.0898467	-0.0248826	0.167481	0.157749	-0.0778783	0.387072	0.528452	0.152612	0.314901	0.521525	0.287004	0.204241	-0.0243497	-0.0582235	-0.381777	-0.469161	0.0437663	-0.247546	-0.210132	-0.501762	-0.42619	-0.706178	-0.695029	-0.373027	-0.63532	-0.598999	-0.699164	-0.484526	-0.513992	-0.676871	-0.76077	-0.779973	-0.630723	-0.65784
Banf1	0.151938	0.124899	-0.097005	0.0763381	-0.291978	-0.328074	0.484974	0.745277	0.553817	0.568312	0.316828	0.328484	0.293066	0.095287	0.0469643	0.230354	0.226511	0.00995213	0.358997	0.540993	0.185101	0.349158	0.603176	0.369616	0.276239	0.0377884	0.0616252	-0.323403	-0.364348	0.0526427	-0.218053	-0.215844	-0.435297	-0.332984	-0.653868	-0.614129	-0.34513	-0.665377	-0.642387	-0.688901	-0.46728	-0.516279	-0.633053	-0.738815	-0.784607	-0.601213	-0.640255
Bard1	0.0943181	0.0967713	-0.134855	0.0873221	-0.364628	-0.365628	0.505656	0.793731	0.632342	0.68674	0.441882	0.421507	0.429135	-0.0119661	-0.0711287	0.150605	0.180408	-0.0666852	0.316471	0.514439	0.236138	0.436996	0.65366	0.425021	0.333495	0.0200517	0.0641269	-0.332276	-0.409615	0.0253778	-0.278916	-0.206839	-0.563183	-0.443634	-0.765167	-0.72214	-0.294156	-0.660105	-0.609983	-0.778671	-0.538533	-0.5731	-0.711811	-0.808433	-0.807164	-0.646446	-0.664348
Bbs4	-0.0247709	-0.0452433	0.140421	-0.0605187	0.348653	0.32253	-0.398987	-0.649377	-0.540235	-0.613203	-0.427422	-0.394527	-0.431772	0.0907788	0.136836	-0.0640209	-0.113726	0.099629	-0.21028	-0.381701	-0.226974	-0.41174	-0.55772	-0.383622	-0.312464	-0.00979217	-0.0668167	0.258164	0.340438	1.67e-05	0.260053	0.154834	0.528055	0.418447	0.674357	0.63477	0.186461	0.513585	0.455453	0.673636	0.471644	0.48994	0.608959	0.679909	0.646201	0.534187	0.533424
BC030867	0.0727798	0.0389779	-0.167133	-0.0323672	-0.399738	-0.409197	0.407611	0.713687	0.503587	0.546674	0.306978	0.349047	0.333862	0.0197996	0.024964	0.221438	0.247182	0.0333643	0.29072	0.514275	0.244448	0.430795	0.691635	0.47063	0.37232	0.0794836	0.168808	-0.266102	-0.29009	0.0391841	-0.227692	-0.206962	-0.452315	-0.317202	-0.664039	-0.597673	-0.271428	-0.665318	-0.635604	-0.720111	-0.486665	-0.541113	-0.628195	-0.743315	-0.777562	-0.586226	-0.619419
Bcan	0.0415298	0.0920325	-0.0912122	0.161392	-0.267794	-0.23786	0.433262	0.632385	0.582546	0.655418	0.490521	0.405412	0.457973	-0.106316	-0.204676	-0.00882088	0.0374324	-0.176585	0.205135	0.32937	0.18759	0.359771	0.445567	0.288495	0.233344	-0.0456913	-0.0380518	-0.282878	-0.402204	-0.0123859	-0.270395	-0.133418	-0.555276	-0.475174	-0.672623	-0.659851	-0.181918	-0.437943	-0.369435	-0.633306	-0.453261	-0.450997	-0.600546	-0.644881	-0.5838	-0.515024	-0.500584
Bcas3	-0.0971157	-0.118339	0.121595	-0.140152	0.34934	0.343391	-0.542609	-0.820273	-0.686039	-0.748149	-0.505751	-0.455014	-0.476557	0.0355853	0.123379	-0.109299	-0.143437	0.117036	-0.318731	-0.503375	-0.233025	-0.440253	-0.630186	-0.402474	-0.315693	0.00836604	-0.0166257	0.356911	0.459987	-0.0163374	0.302486	0.202458	0.614537	0.5024	0.807254	0.77506	0.294686	0.64609	0.585281	0.799622	0.558915	0.582735	0.744068	0.829983	0.80867	0.666368	0.675248
Bcat2	0.332353	0.307255	0.0708318	0.290492	-0.0186758	-0.123657	0.605212	0.742555	0.58724	0.523517	0.260005	0.223124	0.128292	0.294541	0.144014	0.271561	0.191461	-0.00343888	0.497419	0.575354	0.0280068	0.119153	0.360925	0.113455	0.0350658	-0.0421844	-0.164029	-0.41762	-0.474169	0.0897614	-0.156785	-0.225156	-0.314615	-0.294055	-0.541647	-0.560689	-0.499474	-0.627419	-0.632223	-0.54117	-0.365959	-0.407428	-0.568097	-0.652372	-0.740912	-0.574559	-0.633043
Bckdha	0.0245636	0.00489319	0.161376	-0.00443524	0.366447	0.325467	-0.316166	-0.560652	-0.46172	-0.545322	-0.389611	-0.3696	-0.418659	0.132064	0.149372	-0.038502	-0.101202	0.0889695	-0.14501	-0.316607	-0.234187	-0.412005	-0.536433	-0.390997	-0.326874	-0.0248716	-0.108326	0.200474	0.270562	0.0107813	0.241737	0.129628	0.490399	0.376628	0.612252	0.564818	0.12029	0.44767	0.389265	0.617759	0.432782	0.448875	0.54276	0.607531	0.564908	0.467181	0.460286
Bckdhb	-0.0656495	-0.262862	-0.127288	-0.591293	-0.111711	-0.177733	-0.501394	-0.439421	-0.694289	-0.778703	-0.753402	-0.426739	-0.568348	0.230822	0.552365	0.397896	0.353668	0.542058	-0.101311	0.00772459	-0.000614437	-0.101322	0.135569	0.173775	0.141329	0.301057	0.505723	0.334615	0.621329	0.0859611	0.297813	-0.00283297	0.641025	0.702028	0.585968	0.696202	0.0801679	-0.0158121	-0.135285	0.364044	0.313541	0.207354	0.476659	0.382203	0.176126	0.337819	0.248841
Bcl2	0.192168	0.282155	0.112644	0.445605	0.0787198	0.0608424	0.521448	0.534062	0.602567	0.610301	0.485794	0.29896	0.3248	0.0276271	-0.210025	-0.0841475	-0.103491	-0.278538	0.274847	0.240712	-0.00505176	0.07639	0.0558266	-0.068731	-0.0834228	-0.179453	-0.350393	-0.355263	-0.526434	-0.00209043	-0.210421	-0.093846	-0.444567	-0.475874	-0.51255	-0.582972	-0.266688	-0.250532	-0.194814	-0.395636	-0.301643	-0.26419	-0.473182	-0.458099	-0.395029	-0.409453	-0.39081
Bco2	-0.183623	-0.325964	-0.135821	-0.574189	-0.0996607	-0.107286	-0.611393	-0.603974	-0.746259	-0.782127	-0.666984	-0.39954	-0.469497	0.0558963	0.36438	0.204263	0.204955	0.417913	-0.267188	-0.203735	0.00135947	-0.103139	-0.00756416	0.111845	0.114038	0.2521	0.463934	0.414021	0.655412	0.0308	0.280146	0.0795609	0.595622	0.6412	0.635747	0.731585	0.252922	0.210788	0.123009	0.462708	0.364446	0.297373	0.565028	0.521297	0.398377	0.463793	0.418084
Bcs1l	-0.165295	-0.146809	-0.276206	-0.159721	-0.543256	-0.45085	0.191665	0.50679	0.393107	0.531145	0.401858	0.418671	0.511663	-0.279837	-0.217636	-0.00379179	0.11356	-0.0754288	0.0196634	0.254199	0.334058	0.551911	0.669405	0.550602	0.481964	0.0822255	0.270372	-0.10737	-0.160948	-0.0403815	-0.26796	-0.107884	-0.541183	-0.375334	-0.642158	-0.554351	0.0153411	-0.428573	-0.352834	-0.672609	-0.47022	-0.489201	-0.541111	-0.614728	-0.539964	-0.441436	-0.418611
Bet1	0.11107	0.179335	-0.00181306	0.290801	-0.118216	-0.109869	0.481855	0.602111	0.602617	0.647079	0.496013	0.364824	0.405428	-0.0460889	-0.208153	-0.0399221	-0.0227106	-0.223516	0.242169	0.298623	0.105008	0.239856	0.281688	0.135193	0.0966245	-0.105494	-0.177459	-0.321312	-0.465276	-0.00726096	-0.248247	-0.119287	-0.515223	-0.483161	-0.613959	-0.637864	-0.225346	-0.365305	-0.301708	-0.540001	-0.394455	-0.376993	-0.555707	-0.575031	-0.513108	-0.478888	-0.462907
Bhlha15	0.0888248	0.039265	-0.15969	-0.0552085	-0.381239	-0.403883	0.38537	0.68525	0.457043	0.484919	0.243589	0.30646	0.273114	0.06103	0.0801224	0.259827	0.27361	0.0751933	0.301211	0.523679	0.228806	0.400611	0.681336	0.459684	0.359576	0.0950237	0.184837	-0.252796	-0.256025	0.0506123	-0.199218	-0.21021	-0.391946	-0.260028	-0.611012	-0.541966	-0.28523	-0.668551	-0.65121	-0.681188	-0.454831	-0.517367	-0.588896	-0.710157	-0.765965	-0.561919	-0.604709
Bivm	-0.245299	-0.331765	-0.115043	-0.492171	-0.0550829	-0.0220498	-0.637248	-0.686137	-0.722999	-0.724677	-0.548278	-0.355072	-0.367687	-0.0693138	0.193261	0.0363851	0.0655368	0.282702	-0.364424	-0.352875	-0.0125204	-0.11855	-0.145214	0.0279971	0.0592095	0.184275	0.370128	0.434218	0.617866	-0.0122835	0.248859	0.138056	0.521888	0.543364	0.634086	0.704743	0.355286	0.378533	0.320663	0.517943	0.385019	0.355536	0.595487	0.598081	0.547715	0.528976	0.519786
Bloc1s3	-0.12398	0.0259999	-0.0966259	0.244026	-0.25181	-0.129364	0.333346	0.455575	0.59052	0.744854	0.702513	0.498981	0.670924	-0.386972	-0.536223	-0.327137	-0.209307	-0.412505	-0.0206309	0.0326654	0.198431	0.380951	0.242909	0.194953	0.191033	-0.145216	-0.144324	-0.207145	-0.422536	-0.10113	-0.33324	-0.0180386	-0.700232	-0.644605	-0.678297	-0.695551	0.0567186	-0.122925	0.00517476	-0.546625	-0.424658	-0.355858	-0.537243	-0.500994	-0.297776	-0.38109	-0.294989
Bmp8b	-0.0221844	0.11928	-0.0432557	0.334904	-0.184874	-0.0998856	0.453839	0.567717	0.68015	0.80096	0.712147	0.497581	0.63442	-0.279163	-0.472796	-0.261141	-0.178052	-0.403308	0.0965947	0.137837	0.161237	0.33704	0.241834	0.149895	0.136112	-0.166136	-0.219307	-0.293565	-0.515477	-0.0741776	-0.335708	-0.0580903	-0.704718	-0.665941	-0.724205	-0.757575	-0.0656104	-0.217705	-0.100748	-0.588456	-0.45091	-0.389623	-0.602835	-0.577224	-0.405209	-0.461376	-0.392384
Bmpr2	-0.212695	-0.244803	-0.0276631	-0.307434	0.086078	0.125715	-0.566276	-0.703509	-0.635701	-0.636943	-0.426947	-0.328701	-0.313722	-0.0968315	0.0697597	-0.092648	-0.069537	0.142355	-0.367856	-0.438714	-0.0803845	-0.206078	-0.337981	-0.137882	-0.0792038	0.0839598	0.180673	0.383557	0.498838	-0.0340798	0.2257	0.173265	0.463648	0.433457	0.624776	0.647434	0.357942	0.504362	0.46599	0.578342	0.409591	0.416738	0.59897	0.648151	0.647142	0.552849	0.568014
Bmx	-0.0518776	0.0236568	-0.103118	0.126964	-0.257001	-0.189528	0.301208	0.457084	0.474595	0.574881	0.484206	0.38113	0.47495	-0.215854	-0.297892	-0.124067	-0.0493197	-0.224278	0.0678732	0.16149	0.182236	0.338366	0.33299	0.244364	0.214581	-0.0592722	-0.0323202	-0.190536	-0.319095	-0.0467716	-0.252928	-0.0678093	-0.524104	-0.454056	-0.570601	-0.561253	-0.0418797	-0.2555	-0.174342	-0.512004	-0.377336	-0.353611	-0.480188	-0.491966	-0.385917	-0.379607	-0.339869
Bnipl	-0.183414	-0.288126	-0.0780853	-0.469931	0.00508193	0.00791214	-0.611996	-0.678904	-0.738252	-0.771593	-0.612525	-0.405766	-0.452076	0.0209538	0.275605	0.0986877	0.0991687	0.326248	-0.306288	-0.30744	-0.0516775	-0.179767	-0.173915	-0.0163999	0.0110007	0.187092	0.345316	0.412877	0.613936	0.0104493	0.280983	0.121367	0.589545	0.59636	0.680607	0.744402	0.291039	0.347956	0.272148	0.554385	0.415903	0.376541	0.618545	0.613245	0.528291	0.529572	0.50393
Boc	0.149108	0.291302	0.117245	0.535519	0.0780101	0.0968457	0.562403	0.557224	0.703853	0.749115	0.650632	0.391682	0.470931	-0.0874903	-0.376526	-0.220586	-0.210778	-0.412602	0.226061	0.167179	0.00958635	0.113818	0.006762	-0.0966844	-0.0957081	-0.240963	-0.43242	-0.379398	-0.614076	-0.0384191	-0.273616	-0.0655855	-0.582014	-0.621791	-0.608511	-0.697694	-0.210554	-0.177028	-0.0876271	-0.439999	-0.348702	-0.280583	-0.533259	-0.486995	-0.35697	-0.429605	-0.379557
Bola1	0.0583316	0.0769884	-0.106829	0.0950646	-0.290885	-0.279063	0.410169	0.632971	0.530409	0.586263	0.401794	0.363192	0.387055	-0.0487689	-0.110638	0.0744211	0.108182	-0.0953942	0.232073	0.381405	0.192689	0.35917	0.502318	0.329076	0.261793	-0.00296069	0.0269553	-0.268455	-0.349586	0.00789658	-0.240816	-0.153824	-0.489373	-0.396889	-0.635139	-0.606537	-0.211938	-0.497084	-0.446444	-0.629659	-0.440719	-0.458213	-0.581007	-0.64741	-0.624415	-0.516225	-0.520024
Bola3	0.178225	0.181233	-0.0385285	0.188352	-0.195707	-0.231737	0.524547	0.726415	0.596414	0.606449	0.375685	0.332685	0.309301	0.0906272	-0.0152641	0.159613	0.148125	-0.0673678	0.360669	0.489524	0.136779	0.283883	0.476737	0.259912	0.183515	-0.0219233	-0.0553341	-0.352418	-0.430985	0.0422645	-0.224421	-0.194531	-0.454641	-0.386453	-0.644345	-0.634631	-0.348315	-0.586413	-0.554696	-0.638934	-0.442252	-0.470263	-0.619552	-0.697393	-0.71821	-0.579216	-0.605635
Brca1	0.177097	0.140815	-0.0951934	0.0790089	-0.296298	-0.343579	0.515808	0.788852	0.575725	0.581634	0.309833	0.330279	0.281764	0.128369	0.0792586	0.266976	0.254714	0.0294955	0.395924	0.587699	0.186595	0.353946	0.636036	0.383914	0.283114	0.045065	0.0659304	-0.345149	-0.380197	0.0631868	-0.219449	-0.234095	-0.436517	-0.330696	-0.675401	-0.633425	-0.383072	-0.716227	-0.698136	-0.71837	-0.484731	-0.540924	-0.660944	-0.776846	-0.837516	-0.634895	-0.681995
Brd3	0.118488	0.177102	-0.00722723	0.273035	-0.128147	-0.125751	0.481937	0.612269	0.594917	0.6344	0.474218	0.356629	0.388225	-0.0274899	-0.179823	-0.0124316	0.000880942	-0.199724	0.255211	0.321154	0.108562	0.243754	0.305697	0.151315	0.107993	-0.0927292	-0.158259	-0.32169	-0.455097	-0.000537772	-0.242378	-0.128161	-0.501509	-0.464678	-0.611491	-0.630399	-0.239143	-0.391386	-0.332769	-0.547783	-0.396793	-0.385734	-0.558322	-0.585448	-0.535366	-0.48723	-0.477147
Brwd1	-0.0342783	-0.0500691	0.139475	-0.0585064	0.348851	0.327608	-0.406565	-0.660826	-0.542574	-0.611335	-0.418711	-0.390986	-0.422182	0.0761041	0.120728	-0.0799658	-0.125849	0.0888281	-0.223202	-0.397997	-0.226245	-0.410779	-0.568105	-0.38785	-0.314019	-0.0139976	-0.0704563	0.26373	0.341877	-0.00454971	0.257728	0.161169	0.522526	0.411886	0.676269	0.63552	0.20002	0.530793	0.475486	0.67971	0.474369	0.495892	0.614267	0.689251	0.662571	0.542859	0.545696
Bspry	0.209716	0.283399	0.0884397	0.418898	0.0247005	-0.00213795	0.563623	0.620981	0.644175	0.649636	0.48834	0.323858	0.336096	0.0546076	-0.169692	-0.0247802	-0.0467429	-0.243495	0.322244	0.323605	0.0246456	0.125633	0.158622	0.000829031	-0.0302776	-0.154397	-0.307756	-0.383243	-0.542868	0.0109185	-0.225974	-0.126943	-0.472735	-0.483893	-0.577457	-0.634475	-0.313122	-0.353601	-0.301476	-0.479898	-0.354703	-0.331355	-0.541211	-0.548316	-0.504558	-0.480819	-0.473452
Btrc	-0.0936891	-0.059876	0.141644	0.00738561	0.354159	0.372653	-0.408945	-0.691126	-0.489917	-0.521213	-0.286686	-0.323302	-0.300007	-0.0463801	-0.0401411	-0.223087	-0.238011	-0.0339862	-0.300017	-0.504663	-0.217456	-0.388673	-0.642209	-0.425695	-0.33182	-0.0687907	-0.138086	0.26896	0.292578	-0.0434216	0.211744	0.202509	0.42047	0.29925	0.627814	0.570194	0.283438	0.642275	0.617685	0.679101	0.458352	0.510974	0.599716	0.709474	0.749545	0.56468	0.60001
Bub1	0.2293	0.218895	-0.0119311	0.210441	-0.156096	-0.215603	0.558007	0.751905	0.601732	0.588469	0.338461	0.304202	0.255126	0.160307	0.0454204	0.210213	0.177048	-0.0370442	0.413948	0.536779	0.1113	0.246022	0.468258	0.23378	0.152473	-0.0206009	-0.0756601	-0.37816	-0.446055	0.0603266	-0.20676	-0.212291	-0.416961	-0.357886	-0.627579	-0.622785	-0.405804	-0.625224	-0.605953	-0.629407	-0.431471	-0.467554	-0.619549	-0.705346	-0.752413	-0.594786	-0.634147
Bud31	0.0975805	0.124385	-0.103324	0.157303	-0.311973	-0.306074	0.524465	0.776106	0.661849	0.720203	0.494237	0.434087	0.457426	-0.0355296	-0.131394	0.0882386	0.119276	-0.128325	0.303096	0.46736	0.211521	0.405141	0.572366	0.359498	0.280644	-0.0208573	-0.00922577	-0.345586	-0.451874	0.0131311	-0.289333	-0.187853	-0.589215	-0.489803	-0.76614	-0.741941	-0.280506	-0.597289	-0.537432	-0.750082	-0.526463	-0.544519	-0.705005	-0.780644	-0.754725	-0.629097	-0.634697
C4b	0.0337987	-0.0868798	0.0586365	-0.267446	0.198329	0.11885	-0.393283	-0.513119	-0.599758	-0.712725	-0.629436	-0.450406	-0.573506	0.25888	0.415999	0.221796	0.142104	0.34537	-0.0797213	-0.132441	-0.161876	-0.32645	-0.254067	-0.168872	-0.152351	0.133077	0.162222	0.25292	0.443561	0.0661807	0.302696	0.0559845	0.633829	0.588241	0.656766	0.677807	0.0508696	0.213087	0.108647	0.544918	0.414293	0.363947	0.54648	0.5302	0.378971	0.419519	0.359284
C77080	-0.0700241	-0.158076	0.0488712	-0.292928	0.214833	0.179021	-0.532517	-0.703766	-0.708126	-0.788647	-0.621395	-0.46995	-0.543511	0.130657	0.298997	0.0825097	0.0356768	0.279689	-0.233064	-0.323652	-0.169051	-0.350327	-0.386827	-0.224533	-0.17833	0.110804	0.156702	0.350545	0.524609	0.0254736	0.316844	0.130736	0.656882	0.598008	0.761634	0.776078	0.207705	0.421559	0.333819	0.676603	0.495	0.471363	0.67418	0.697105	0.601095	0.566994	0.537296
Caap1	0.0174319	-0.105344	0.0284052	-0.293719	0.140745	0.068836	-0.38038	-0.466206	-0.570204	-0.671099	-0.60186	-0.414939	-0.531832	0.236438	0.405373	0.230595	0.161568	0.348248	-0.077089	-0.103397	-0.127733	-0.271615	-0.181381	-0.108833	-0.100344	0.1471	0.198754	0.246328	0.436812	0.0642171	0.280404	0.0437661	0.58959	0.562184	0.599984	0.632014	0.0513778	0.16586	0.066774	0.480709	0.37062	0.316054	0.497714	0.471655	0.323553	0.378158	0.318204
Cabp1	0.0134385	0.155324	-0.00672389	0.377718	-0.123218	-0.052334	0.471011	0.555268	0.677643	0.781599	0.69402	0.4697	0.594271	-0.238154	-0.451967	-0.255087	-0.188088	-0.405212	0.120243	0.137095	0.125415	0.283241	0.182166	0.0908234	0.0815139	-0.182947	-0.26675	-0.307972	-0.532003	-0.0669694	-0.318997	-0.0568674	-0.671611	-0.651444	-0.689758	-0.735878	-0.0928589	-0.199909	-0.0893792	-0.546447	-0.42205	-0.358662	-0.578865	-0.54735	-0.384066	-0.446215	-0.380915
Cacna1h	0.0596211	0.207853	0.0698695	0.45185	0.0191436	0.0702319	0.453048	0.455292	0.619953	0.693841	0.636395	0.389422	0.498322	-0.180013	-0.427936	-0.275576	-0.235767	-0.416719	0.122603	0.0748082	0.0418147	0.150982	0.00795401	-0.0565543	-0.0470942	-0.220576	-0.363406	-0.301177	-0.528042	-0.0613799	-0.269047	-0.0303961	-0.572941	-0.597696	-0.563426	-0.637797	-0.102812	-0.0936336	0.00459861	-0.400035	-0.322965	-0.248997	-0.471812	-0.416822	-0.261004	-0.356378	-0.291998
Cacybp	0.142609	0.140552	-0.0621031	0.135261	-0.224614	-0.25093	0.467971	0.676928	0.543119	0.56119	0.3452	0.318782	0.301366	0.0642063	-0.0145514	0.154723	0.153123	-0.0491416	0.319962	0.458432	0.150548	0.297131	0.486722	0.28447	0.209441	-0.00284318	-0.00993888	-0.312644	-0.378084	0.0369725	-0.213484	-0.182757	-0.431133	-0.354173	-0.610669	-0.590948	-0.306627	-0.560012	-0.529076	-0.615571	-0.424506	-0.454508	-0.58341	-0.662141	-0.680898	-0.54336	-0.567808
Cadps	-0.0554124	0.114531	-0.0417984	0.373679	-0.181868	-0.0743137	0.454229	0.552434	0.712166	0.854354	0.788895	0.537187	0.705114	-0.348805	-0.564973	-0.342732	-0.242057	-0.47401	0.0538278	0.0781133	0.166375	0.350107	0.200225	0.128436	0.125964	-0.197799	-0.258715	-0.29177	-0.545233	-0.0962908	-0.36263	-0.0349493	-0.764374	-0.731628	-0.753667	-0.796804	-0.0190492	-0.155359	-0.0207349	-0.590376	-0.461191	-0.382124	-0.612861	-0.567477	-0.357299	-0.450485	-0.36296
Cadps2	-0.0838385	-0.187361	-0.000330081	-0.353324	0.121988	0.0891499	-0.515972	-0.627185	-0.678611	-0.748738	-0.612264	-0.431994	-0.508492	0.123126	0.320953	0.130014	0.0930744	0.314806	-0.213561	-0.255278	-0.117092	-0.269428	-0.255445	-0.120414	-0.0913823	0.147059	0.232901	0.341917	0.529706	0.0313241	0.293969	0.102722	0.614195	0.586738	0.687383	0.723658	0.191576	0.323437	0.236627	0.57864	0.43223	0.394462	0.604469	0.603826	0.496883	0.500084	0.463205
Calr	0.109825	0.0936966	-0.117975	0.0578657	-0.322349	-0.339311	0.455049	0.72034	0.546154	0.579345	0.344825	0.349474	0.334947	0.0385791	-0.00209477	0.188347	0.20201	-0.0143917	0.313925	0.499795	0.204626	0.377718	0.606668	0.38869	0.299791	0.0366145	0.0778661	-0.300678	-0.349906	0.0377949	-0.230975	-0.20029	-0.463034	-0.35392	-0.663507	-0.619981	-0.296745	-0.630298	-0.597433	-0.692578	-0.473236	-0.515481	-0.629316	-0.728092	-0.752507	-0.585133	-0.613539
Camk1d	-0.116778	-0.168746	0.0555011	-0.248034	0.232291	0.225471	-0.552924	-0.755236	-0.693114	-0.748354	-0.541486	-0.436225	-0.470351	0.0418459	0.184348	-0.0274216	-0.0528063	0.192589	-0.300745	-0.420464	-0.171433	-0.350456	-0.46514	-0.267948	-0.203736	0.0700765	0.104932	0.366622	0.503779	-0.00380027	0.293652	0.168535	0.60334	0.532298	0.754653	0.755181	0.27937	0.527299	0.460095	0.705025	0.503283	0.503607	0.689932	0.7418	0.694406	0.606839	0.601493
Capn2	-0.31603	-0.402666	-0.172779	-0.573587	-0.144296	-0.0851946	-0.698507	-0.711669	-0.755558	-0.729563	-0.540105	-0.329054	-0.319207	-0.144324	0.157595	0.0143346	0.0711606	0.288306	-0.427132	-0.383916	0.0380348	-0.0474218	-0.0779066	0.108455	0.137382	0.212561	0.450794	0.480154	0.671444	-0.0273704	0.234759	0.148848	0.494423	0.542127	0.617094	0.707905	0.423243	0.387631	0.3388	0.488841	0.365009	0.334269	0.594684	0.592939	0.559222	0.540677	0.539695
Capn9	0.0568931	0.147624	0.00309571	0.292757	-0.0906715	-0.058274	0.405774	0.485814	0.542615	0.603674	0.504575	0.35017	0.41977	-0.117224	-0.281172	-0.128874	-0.0950562	-0.270621	0.154635	0.180094	0.0912217	0.212158	0.182504	0.0834231	0.0647371	-0.126985	-0.198851	-0.268399	-0.426335	-0.0315022	-0.238424	-0.072708	-0.499401	-0.481091	-0.546583	-0.579115	-0.136358	-0.231559	-0.157993	-0.451614	-0.34047	-0.304768	-0.475739	-0.468233	-0.372165	-0.387459	-0.352574
Capns1	-0.121624	0.00803127	-0.12146	0.191093	-0.295402	-0.180183	0.327253	0.481528	0.575454	0.725618	0.663732	0.492222	0.649876	-0.363257	-0.484725	-0.271899	-0.156268	-0.36209	-0.00206349	0.0801075	0.219131	0.409044	0.315234	0.250536	0.235016	-0.112324	-0.0866594	-0.202662	-0.395222	-0.0897385	-0.327191	-0.0370684	-0.683892	-0.611403	-0.685987	-0.688081	0.0379059	-0.18411	-0.064034	-0.578533	-0.440292	-0.385655	-0.551677	-0.533928	-0.352232	-0.404227	-0.32909
Capzb	0.0736121	0.153714	-0.0588187	0.27497	-0.234001	-0.201631	0.537173	0.723416	0.710023	0.788886	0.610923	0.471419	0.538943	-0.119773	-0.27876	-0.0586335	-0.0129596	-0.260766	0.24532	0.348741	0.178671	0.364629	0.421008	0.249284	0.197554	-0.0983072	-0.135175	-0.353545	-0.519683	-0.0203738	-0.317267	-0.140768	-0.656141	-0.589905	-0.772826	-0.781294	-0.219927	-0.453175	-0.368231	-0.69718	-0.506708	-0.488991	-0.687792	-0.718963	-0.631768	-0.583576	-0.55857
Car2	0.0629012	-0.112948	0.0341272	-0.382036	0.164123	0.0528766	-0.43832	-0.521163	-0.697058	-0.840588	-0.788479	-0.52896	-0.702205	0.359873	0.580255	0.364495	0.262373	0.486666	-0.0358452	-0.0479749	-0.156675	-0.333843	-0.164671	-0.10496	-0.10832	0.206377	0.272731	0.281122	0.538702	0.101241	0.357467	0.0229444	0.755104	0.729111	0.731074	0.778687	0.00130728	0.118405	-0.0177162	0.560989	0.442754	0.358627	0.588816	0.535547	0.318086	0.424963	0.333227
Card6	0.0168504	-0.0339908	0.16033	-0.0926931	0.390604	0.335603	-0.426416	-0.689154	-0.616457	-0.721603	-0.544322	-0.473892	-0.549025	0.180011	0.246945	0.0152248	-0.0607485	0.178675	-0.177128	-0.351841	-0.260269	-0.472817	-0.57668	-0.408947	-0.342325	0.0168189	-0.0454472	0.272918	0.393129	0.0244316	0.312729	0.144079	0.63984	0.522412	0.767594	0.73119	0.146562	0.496342	0.413883	0.741019	0.527722	0.530049	0.674367	0.732589	0.655093	0.569984	0.549353
Cars	0.269195	0.28566	0.0454062	0.328312	-0.0682669	-0.132492	0.623885	0.770398	0.669974	0.649812	0.406419	0.319483	0.277329	0.169333	-0.00622984	0.157071	0.113221	-0.109457	0.439051	0.516469	0.0682154	0.191863	0.368716	0.137918	0.0686062	-0.078116	-0.19195	-0.425163	-0.530918	0.0548113	-0.220631	-0.203267	-0.450926	-0.422377	-0.645553	-0.669485	-0.432347	-0.582076	-0.554746	-0.609702	-0.426346	-0.444853	-0.634864	-0.698751	-0.726565	-0.602289	-0.632596
Casc4	0.17923	0.317133	0.0961427	0.55316	0.015115	0.0276331	0.665434	0.715293	0.823457	0.873151	0.722312	0.464066	0.537555	-0.0713872	-0.371585	-0.175841	-0.165712	-0.414107	0.299949	0.27929	0.0497759	0.189605	0.133893	-0.0182491	-0.0366342	-0.234311	-0.420654	-0.447956	-0.69295	-0.0284561	-0.321673	-0.110364	-0.678251	-0.696288	-0.749743	-0.830787	-0.281242	-0.315731	-0.220431	-0.587377	-0.449137	-0.390563	-0.668905	-0.644223	-0.521852	-0.557266	-0.514521
Casd1	-0.258704	-0.407292	-0.242044	-0.681917	-0.292337	-0.268498	-0.606049	-0.492401	-0.684609	-0.676423	-0.592614	-0.295294	-0.339238	-0.0362672	0.322054	0.218997	0.260138	0.429722	-0.28846	-0.140573	0.114354	0.0735367	0.215447	0.307321	0.287113	0.302796	0.598244	0.418057	0.663327	0.0191438	0.215722	0.0519818	0.468156	0.573786	0.479535	0.613816	0.284788	0.0896434	0.0197087	0.28073	0.240783	0.161633	0.436929	0.365059	0.257199	0.360453	0.318869
Cask	-0.206028	-0.2736	-0.0817089	-0.398499	-0.0158816	0.0121702	-0.549495	-0.61188	-0.625843	-0.629946	-0.468203	-0.314301	-0.322921	-0.0592667	0.154178	0.0121222	0.0343615	0.226937	-0.31921	-0.326319	-0.0278582	-0.127743	-0.169428	-0.0116999	0.0211069	0.144001	0.289013	0.373616	0.524616	-0.0132708	0.21907	0.12808	0.45753	0.465138	0.564988	0.617642	0.310424	0.358261	0.309214	0.474802	0.349258	0.32948	0.531252	0.542083	0.504176	0.474324	0.469574
Casp16	0.128957	0.233954	0.0605767	0.411747	-0.012757	0.000550088	0.513005	0.565034	0.641357	0.684894	0.56448	0.369933	0.429378	-0.0656619	-0.290186	-0.13241	-0.119738	-0.316374	0.228833	0.223831	0.0525356	0.168135	0.131843	0.0109496	-0.00619133	-0.173563	-0.306359	-0.344407	-0.532114	-0.0230808	-0.25544	-0.0887736	-0.5375	-0.543715	-0.596589	-0.653995	-0.213143	-0.259252	-0.183863	-0.475212	-0.361293	-0.317963	-0.531062	-0.515885	-0.420285	-0.442264	-0.409084
Casq2	-0.0634469	-0.128655	0.0282752	-0.230005	0.147971	0.125499	-0.407358	-0.53075	-0.533845	-0.589575	-0.461938	-0.346952	-0.397984	0.0852094	0.216307	0.0565242	0.0259107	0.208353	-0.184542	-0.248189	-0.119086	-0.25158	-0.280816	-0.156956	-0.122426	0.0862149	0.127932	0.269016	0.399596	0.0163327	0.234409	0.0999768	0.486138	0.445714	0.566799	0.580274	0.166417	0.318358	0.254442	0.502104	0.3673	0.349874	0.504174	0.521199	0.452705	0.426287	0.40571
Catsperd	0.00395504	-0.094467	0.110866	-0.234675	0.319232	0.25047	-0.503182	-0.719032	-0.724805	-0.842516	-0.682281	-0.53308	-0.639765	0.228032	0.37057	0.124682	0.0434394	0.303956	-0.175852	-0.301593	-0.232385	-0.447518	-0.472747	-0.317309	-0.267862	0.0943414	0.0907863	0.32512	0.507833	0.0464381	0.355917	0.12379	0.736756	0.648366	0.832014	0.828427	0.142851	0.427671	0.322047	0.749207	0.548369	0.521403	0.719051	0.744374	0.618544	0.588636	0.545391
Cbr4	-0.199911	-0.282351	-0.0694821	-0.42878	0.0187757	0.035788	-0.602987	-0.68651	-0.708177	-0.72841	-0.55312	-0.377757	-0.402741	-0.0235508	0.208229	0.0380493	0.0486473	0.2702	-0.331027	-0.34937	-0.0540582	-0.17843	-0.21452	-0.0432782	-0.00685184	0.158646	0.303953	0.407809	0.583119	-0.00480023	0.261479	0.137768	0.545894	0.544677	0.658914	0.712468	0.318076	0.394657	0.331515	0.555789	0.409865	0.384516	0.609959	0.620561	0.56322	0.535752	0.523481
Cbx7	-0.141048	-0.16982	0.0626016	-0.21279	0.246533	0.256501	-0.557362	-0.779594	-0.675711	-0.716175	-0.486916	-0.412721	-0.423028	-0.0100478	0.112615	-0.095144	-0.108427	0.135708	-0.337074	-0.475974	-0.174427	-0.351687	-0.514408	-0.297718	-0.222583	0.0421386	0.0666442	0.370855	0.483115	-0.0213211	0.27732	0.190248	0.565982	0.486344	0.744697	0.735265	0.318085	0.588799	0.534586	0.71852	0.505308	0.520799	0.693907	0.763815	0.746481	0.625977	0.635537
Cc2d2a	-0.185252	-0.184531	0.0340371	-0.186658	0.187037	0.227396	-0.521875	-0.720494	-0.586598	-0.591725	-0.360082	-0.321198	-0.292469	-0.103869	0.000510387	-0.169663	-0.154048	0.0576813	-0.365908	-0.492953	-0.13063	-0.273246	-0.470892	-0.25341	-0.176733	0.0195549	0.0552886	0.351235	0.425198	-0.0456586	0.216894	0.195706	0.438808	0.372643	0.630645	0.621245	0.354592	0.5873	0.558957	0.628012	0.433538	0.463393	0.609877	0.68893	0.715626	0.573702	0.602766
Ccdc122	0.0186107	-0.123429	0.013335	-0.343911	0.119322	0.0395163	-0.405437	-0.475095	-0.610462	-0.718846	-0.657968	-0.440737	-0.572405	0.262557	0.458561	0.277095	0.203506	0.39844	-0.0706154	-0.0796576	-0.120648	-0.267168	-0.144469	-0.0783466	-0.0767237	0.176024	0.246864	0.263001	0.478042	0.0745078	0.298828	0.0343369	0.630637	0.612808	0.626689	0.670277	0.0434774	0.136433	0.0272153	0.485687	0.380125	0.313758	0.515044	0.475924	0.306754	0.383904	0.314035
Ccdc124	0.00449838	0.0690809	-0.139734	0.152847	-0.366107	-0.312406	0.479631	0.732667	0.677751	0.78302	0.598797	0.5015	0.581468	-0.179239	-0.277881	-0.0364788	0.0366033	-0.218151	0.201182	0.363014	0.251092	0.467835	0.558113	0.38267	0.317974	-0.0438892	-0.00721305	-0.309523	-0.452054	-0.026764	-0.332771	-0.14821	-0.683287	-0.574901	-0.811433	-0.78682	-0.170126	-0.503349	-0.414178	-0.76686	-0.549905	-0.5449	-0.71378	-0.765359	-0.677306	-0.601983	-0.577192
Ccdc32	-0.186009	-0.323386	-0.100983	-0.559482	-0.0224711	-0.0323178	-0.671047	-0.718336	-0.82609	-0.873036	-0.720458	-0.461371	-0.532342	0.0636212	0.366814	0.172286	0.16485	0.413289	-0.306376	-0.283457	-0.0454978	-0.183548	-0.129358	0.0244587	0.042927	0.236126	0.426793	0.452172	0.697276	0.0267203	0.320144	0.111877	0.675149	0.695242	0.748258	0.830818	0.288177	0.318163	0.223941	0.585385	0.447599	0.389279	0.669145	0.644534	0.52432	0.558932	0.517258
Ccdc82	-0.154103	-0.222595	0.00330461	-0.33599	0.147344	0.149157	-0.591626	-0.74806	-0.723074	-0.766294	-0.56809	-0.427044	-0.460246	0.0193617	0.20614	0.00505885	-0.00672284	0.236423	-0.320405	-0.399107	-0.126517	-0.288046	-0.368994	-0.17814	-0.124618	0.112381	0.196367	0.395596	0.555415	-0.00295688	0.290583	0.159047	0.601035	0.558243	0.738641	0.762636	0.301757	0.482578	0.413932	0.662706	0.479282	0.467441	0.677483	0.711942	0.656395	0.594328	0.584667
Ccdc84	-0.221483	-0.231366	-0.0542566	-0.262857	0.0151369	0.0724692	-0.469055	-0.56127	-0.488936	-0.462564	-0.28208	-0.215723	-0.17495	-0.154236	-0.0153889	-0.126195	-0.0831543	0.0755083	-0.340472	-0.38494	-0.0292123	-0.109223	-0.240795	-0.0694953	-0.0200576	0.0643895	0.165083	0.32138	0.397695	-0.0464067	0.150473	0.150936	0.307734	0.296872	0.452856	0.476937	0.337933	0.423677	0.408785	0.424525	0.296376	0.31034	0.452691	0.498051	0.526856	0.435588	0.461628
Ccdc90b	0.00156219	-0.124228	0.0324803	-0.317467	0.161573	0.0913564	-0.436577	-0.542618	-0.637139	-0.74117	-0.649412	-0.454394	-0.57175	0.23341	0.415774	0.221225	0.151728	0.362148	-0.111632	-0.150198	-0.142957	-0.303391	-0.228663	-0.134788	-0.119173	0.152405	0.208299	0.283884	0.485764	0.0617971	0.307034	0.0624226	0.64402	0.609835	0.671887	0.70377	0.0842296	0.222833	0.118664	0.549444	0.419043	0.365801	0.565097	0.545522	0.396021	0.439221	0.380336
Ccdc92	0.133922	0.28329	0.0964082	0.53549	0.0345713	0.0640192	0.587455	0.606492	0.751608	0.811556	0.70349	0.437389	0.529275	-0.120274	-0.411473	-0.234032	-0.212272	-0.433824	0.226345	0.183973	0.0380484	0.162965	0.0575141	-0.0551005	-0.0584761	-0.241756	-0.421618	-0.394239	-0.640858	-0.0449808	-0.303426	-0.0728845	-0.643314	-0.670687	-0.675077	-0.759567	-0.207239	-0.208136	-0.108936	-0.503134	-0.394553	-0.324822	-0.587949	-0.544724	-0.401923	-0.471899	-0.416976
Cck	0.249278	0.326526	0.120153	0.473277	0.070838	0.0312957	0.609412	0.649245	0.679209	0.671925	0.501086	0.321225	0.324075	0.0903157	-0.161039	-0.0187	-0.0543293	-0.25655	0.360128	0.344503	-0.00012006	0.0934728	0.126257	-0.0412098	-0.0713423	-0.174519	-0.358902	-0.416441	-0.585827	0.0176537	-0.226157	-0.134453	-0.474335	-0.499441	-0.58544	-0.654717	-0.353229	-0.363986	-0.314129	-0.477681	-0.354314	-0.328743	-0.555411	-0.559411	-0.52088	-0.498656	-0.49425
Ccndbp1	-0.123316	-0.121653	0.097975	-0.111625	0.295047	0.310926	-0.49222	-0.742915	-0.591188	-0.625645	-0.391506	-0.369921	-0.362406	-0.0327132	0.0362825	-0.159784	-0.172177	0.053885	-0.32512	-0.495047	-0.193351	-0.367462	-0.575913	-0.357081	-0.272442	-0.0100642	-0.027943	0.326306	0.396392	-0.0332428	0.246091	0.198156	0.496616	0.397805	0.691156	0.659375	0.307526	0.619314	0.579833	0.701945	0.484267	0.517949	0.652187	0.741766	0.753485	0.600726	0.623486
Ccr1	0.175955	0.126597	-0.104771	0.0429984	-0.308202	-0.36047	0.492723	0.77419	0.541406	0.542047	0.267318	0.308749	0.250449	0.145175	0.11555	0.296603	0.281312	0.064268	0.396156	0.597983	0.189608	0.35335	0.655116	0.401208	0.296683	0.0648299	0.0989374	-0.329763	-0.347265	0.0696888	-0.204244	-0.238175	-0.403196	-0.291783	-0.649543	-0.599916	-0.384433	-0.729138	-0.718312	-0.707252	-0.472933	-0.536776	-0.641775	-0.765574	-0.840304	-0.624088	-0.677607
Ccr10	-0.164126	-0.0727903	-0.201089	0.0382499	-0.424339	-0.306235	0.26459	0.494339	0.510871	0.669286	0.585055	0.485407	0.6302	-0.365709	-0.40876	-0.185869	-0.0576704	-0.262263	-0.0146264	0.136756	0.283948	0.495686	0.477084	0.394958	0.358508	-0.0332612	0.0708105	-0.157005	-0.299964	-0.0784967	-0.317756	-0.060824	-0.656466	-0.538784	-0.692026	-0.654038	0.0527593	-0.276746	-0.167285	-0.637324	-0.468801	-0.44068	-0.561506	-0.578804	-0.427045	-0.424145	-0.363969
Ccser1	-0.0550165	-0.139523	0.0523985	-0.267747	0.211443	0.173251	-0.491835	-0.655321	-0.661958	-0.742141	-0.588619	-0.446155	-0.519903	0.136098	0.290851	0.0856808	0.0373312	0.266432	-0.208027	-0.295376	-0.164633	-0.337432	-0.367293	-0.218198	-0.17545	0.102782	0.140245	0.322966	0.487411	0.0271962	0.300417	0.119587	0.622894	0.565113	0.71767	0.729556	0.183386	0.389472	0.304957	0.637449	0.466839	0.443572	0.632466	0.653041	0.558433	0.529096	0.498997
Ccser2	-0.313659	-0.323973	-0.0910151	-0.364596	-0.0134174	0.0718556	-0.625317	-0.731869	-0.637486	-0.591495	-0.352768	-0.264084	-0.200691	-0.231981	-0.0409294	-0.17732	-0.11024	0.0930152	-0.464368	-0.511197	-0.0183189	-0.112791	-0.28794	-0.0612539	0.00238312	0.0905049	0.23865	0.430095	0.528265	-0.0671205	0.18577	0.199905	0.380033	0.375297	0.572956	0.610538	0.463381	0.553041	0.538783	0.534429	0.372449	0.39145	0.580424	0.638788	0.685253	0.56489	0.602984
Cd200r2	0.220286	0.119711	0.249147	0.00258652	0.50682	0.362845	-0.248374	-0.514161	-0.532259	-0.720308	-0.639702	-0.539655	-0.710974	0.442483	0.467949	0.219893	0.0646208	0.284785	0.0561124	-0.123111	-0.334504	-0.574383	-0.547075	-0.46848	-0.429105	0.0222386	-0.119112	0.141627	0.293544	0.0950596	0.35166	0.0568263	0.725921	0.584989	0.755163	0.703618	-0.100432	0.285811	0.161457	0.700915	0.515598	0.484486	0.603894	0.623118	0.447037	0.447286	0.376214
Cd209f	0.0705752	-0.0772401	0.0520792	-0.299727	0.180665	0.0792304	-0.370856	-0.463583	-0.602421	-0.733812	-0.683701	-0.470245	-0.623034	0.325914	0.501524	0.306691	0.211132	0.410034	-0.0242347	-0.0524948	-0.157125	-0.320783	-0.1866	-0.130813	-0.129074	0.163893	0.20172	0.23615	0.45351	0.0886294	0.316469	0.0246959	0.666692	0.631761	0.65181	0.68382	-0.00733921	0.124554	0.00528524	0.513174	0.400902	0.332055	0.525054	0.4857	0.29781	0.380776	0.301929
Cd300ld	-0.0140952	0.13672	-0.00461981	0.372271	-0.108357	-0.0264715	0.425671	0.489	0.637291	0.748064	0.687638	0.455417	0.592583	-0.270238	-0.481403	-0.295333	-0.220944	-0.42224	0.074623	0.0761159	0.11704	0.265707	0.130793	0.0644101	0.0650635	-0.190555	-0.272632	-0.276716	-0.504156	-0.0780436	-0.309334	-0.0328686	-0.653654	-0.640406	-0.645939	-0.695468	-0.0469019	-0.130598	-0.0167695	-0.494528	-0.388997	-0.31757	-0.530402	-0.486131	-0.308343	-0.39403	-0.320322
Cd300lg	0.202754	0.111845	0.244682	0.00860524	0.500273	0.366246	-0.253899	-0.52207	-0.524603	-0.703001	-0.613164	-0.524175	-0.682967	0.412262	0.433539	0.190136	0.0432417	0.261278	0.0359028	-0.146441	-0.328486	-0.563995	-0.555741	-0.469008	-0.425931	0.0139321	-0.125503	0.146452	0.288357	0.0862085	0.341445	0.0657624	0.703584	0.562819	0.744129	0.690997	-0.0784877	0.308205	0.190615	0.698195	0.510683	0.485528	0.600849	0.626475	0.464822	0.452404	0.388361
Cd36	-0.0239988	-0.0784575	0.136836	-0.147502	0.363973	0.320696	-0.49173	-0.750964	-0.677647	-0.773505	-0.576513	-0.490603	-0.557542	0.147757	0.242686	0.003349	-0.061351	0.194289	-0.226314	-0.393974	-0.247831	-0.462552	-0.575579	-0.388718	-0.318973	0.0348658	-0.000436616	0.318718	0.451696	0.0171681	0.325585	0.160194	0.666978	0.557217	0.809534	0.78268	0.196791	0.5352	0.452488	0.773885	0.551576	0.553267	0.719575	0.779107	0.70617	0.615509	0.598316
Cd4	-0.0123928	0.119883	0.0042407	0.327531	-0.0761492	-0.00559981	0.356932	0.399349	0.536194	0.629839	0.585737	0.3818	0.500716	-0.232802	-0.417854	-0.26396	-0.201283	-0.368252	0.0563351	0.0482294	0.0908231	0.212348	0.0856372	0.0356652	0.0399492	-0.169498	-0.245986	-0.232209	-0.429182	-0.0687058	-0.259807	-0.0212914	-0.550147	-0.544575	-0.535995	-0.5822	-0.0331546	-0.0891874	0.00827632	-0.40195	-0.319227	-0.255118	-0.43753	-0.394658	-0.239539	-0.321059	-0.256094
Cd44	0.427518	0.465332	0.204095	0.568175	0.183681	0.0673752	0.765728	0.795054	0.75442	0.674876	0.423951	0.263373	0.184595	0.316304	0.0227028	0.149119	0.044063	-0.173719	0.560387	0.533949	-0.0706824	-0.00340196	0.134645	-0.106931	-0.158256	-0.176855	-0.436295	-0.531845	-0.677951	0.0772963	-0.19225	-0.206485	-0.400175	-0.449978	-0.592168	-0.67816	-0.565615	-0.533982	-0.519453	-0.503539	-0.359833	-0.360548	-0.611963	-0.646005	-0.689646	-0.599532	-0.637117
Cd46	-0.150004	-0.201615	-0.0108784	-0.290153	0.100747	0.112443	-0.503058	-0.626362	-0.599162	-0.624465	-0.453624	-0.339385	-0.355973	-0.0141863	0.14552	-0.0153663	-0.0153776	0.184178	-0.287035	-0.347366	-0.0914125	-0.218439	-0.295732	-0.131496	-0.0858836	0.0940375	0.174596	0.337928	0.466191	-0.00992486	0.231805	0.137934	0.479174	0.449091	0.600563	0.623505	0.273563	0.411467	0.360051	0.539777	0.389073	0.382101	0.557355	0.588214	0.553018	0.49536	0.492592
Cd7	0.0344757	0.151188	0.0358156	0.340347	-0.0211976	0.0250266	0.363773	0.386103	0.507179	0.574075	0.521492	0.330427	0.421673	-0.159614	-0.348075	-0.215581	-0.176549	-0.32946	0.0953531	0.0735292	0.0547093	0.153945	0.0497196	-0.00770977	-0.00468991	-0.166144	-0.264482	-0.240451	-0.420489	-0.0507315	-0.226864	-0.0302069	-0.481205	-0.489499	-0.479873	-0.531879	-0.077609	-0.0996436	-0.0181076	-0.354688	-0.28171	-0.225266	-0.401744	-0.36359	-0.237046	-0.305218	-0.253407
Cdc14b	-0.186033	-0.196944	0.0351229	-0.217222	0.198165	0.232552	-0.560752	-0.766872	-0.642754	-0.656645	-0.417589	-0.360404	-0.342035	-0.0838648	0.037871	-0.148811	-0.138899	0.090946	-0.37578	-0.50466	-0.14153	-0.297471	-0.487088	-0.261906	-0.184333	0.0343477	0.0765663	0.37662	0.468999	-0.0401079	0.243489	0.200567	0.494756	0.426619	0.688275	0.682474	0.362158	0.604481	0.566957	0.673989	0.468952	0.493663	0.658248	0.734869	0.748076	0.611038	0.634721
Cdc34	0.252019	0.247647	0.0479039	0.257207	-0.0376997	-0.108856	0.514236	0.634076	0.525565	0.490216	0.277351	0.226683	0.168756	0.19523	0.0596985	0.181481	0.129443	-0.0453687	0.392728	0.458699	0.0408592	0.130934	0.307754	0.106976	0.0447519	-0.0492005	-0.147062	-0.352609	-0.419689	0.0609672	-0.157635	-0.180001	-0.319595	-0.298507	-0.496951	-0.514434	-0.39081	-0.508371	-0.499277	-0.482616	-0.332015	-0.357634	-0.503854	-0.566522	-0.616067	-0.493297	-0.530886
Cdc42ep2	0.185985	0.293875	0.0857205	0.481746	0.00852432	0.00552882	0.61281	0.671083	0.738233	0.770498	0.615392	0.402851	0.450229	-0.0208415	-0.281439	-0.107196	-0.108906	-0.334006	0.304509	0.298297	0.0444071	0.169035	0.155069	0.000969532	-0.0239185	-0.193789	-0.358795	-0.413772	-0.6183	-0.0116405	-0.279457	-0.117614	-0.587161	-0.598689	-0.673701	-0.741152	-0.289626	-0.334638	-0.258342	-0.542992	-0.409037	-0.367174	-0.61173	-0.602702	-0.515216	-0.522433	-0.49537
Cdc45	0.0910484	0.0693442	-0.138401	0.0213927	-0.35374	-0.365847	0.432282	0.712655	0.52716	0.565891	0.331968	0.350156	0.337542	0.0255505	0.00327073	0.196029	0.216016	0.00140518	0.299379	0.499328	0.221031	0.399457	0.637194	0.420432	0.328723	0.0527033	0.113888	-0.284105	-0.324369	0.0366863	-0.230186	-0.200531	-0.46006	-0.340746	-0.662261	-0.609805	-0.281123	-0.637802	-0.60526	-0.700916	-0.477229	-0.523289	-0.626214	-0.730153	-0.756068	-0.581789	-0.610841
Cdca5	0.358448	0.327063	0.0802773	0.302705	-0.00826473	-0.124312	0.632164	0.772233	0.603772	0.530305	0.252268	0.219105	0.112344	0.327055	0.171043	0.29879	0.209166	0.00942394	0.529523	0.609089	0.0213308	0.111143	0.371624	0.110743	0.0279886	-0.0410513	-0.172035	-0.437093	-0.490304	0.0988335	-0.154679	-0.238137	-0.309406	-0.290435	-0.550804	-0.571169	-0.533059	-0.660454	-0.670006	-0.554076	-0.372903	-0.418961	-0.583955	-0.674154	-0.77504	-0.596296	-0.66128
Cdr2	0.00411042	0.0949426	-0.0645444	0.229464	-0.21328	-0.157531	0.409115	0.554717	0.586454	0.678726	0.563022	0.422376	0.513068	-0.186132	-0.321453	-0.131226	-0.0690377	-0.273221	0.134811	0.211742	0.164111	0.326832	0.318875	0.205153	0.1738	-0.0991437	-0.118699	-0.265476	-0.42545	-0.0421367	-0.283394	-0.0869534	-0.589293	-0.533502	-0.650454	-0.659833	-0.109225	-0.299847	-0.212351	-0.567988	-0.42084	-0.390291	-0.558863	-0.566473	-0.455295	-0.451769	-0.41158
Cdsn	0.115209	-0.026325	0.135978	-0.226447	0.340615	0.218604	-0.407226	-0.59475	-0.684523	-0.849049	-0.759331	-0.568321	-0.737784	0.386895	0.529487	0.280763	0.155935	0.400965	-0.0326495	-0.134577	-0.251875	-0.472948	-0.389383	-0.297949	-0.273665	0.12451	0.0998315	0.254859	0.472225	0.0936619	0.378095	0.0591804	0.788899	0.703372	0.809514	0.810877	-0.00758417	0.257211	0.123348	0.691921	0.522337	0.465521	0.660821	0.648999	0.453091	0.496309	0.417017
Cdyl2	0.116357	0.241499	0.0823189	0.453162	0.0300147	0.0534335	0.49938	0.516141	0.636618	0.685991	0.592718	0.368803	0.444768	-0.0972841	-0.343581	-0.193667	-0.176495	-0.364224	0.195328	0.16006	0.031528	0.136935	0.0506787	-0.0462675	-0.0497847	-0.203667	-0.356425	-0.3353	-0.542908	-0.0367385	-0.255916	-0.0633657	-0.542455	-0.565586	-0.571319	-0.642671	-0.17938	-0.180527	-0.097428	-0.426841	-0.334229	-0.276063	-0.498643	-0.463075	-0.344242	-0.401462	-0.356005
Ceacam12	0.239879	0.226059	-0.00697191	0.213309	-0.148694	-0.213307	0.564114	0.756947	0.601538	0.583225	0.32894	0.297505	0.242634	0.175553	0.0597193	0.222231	0.184446	-0.0291049	0.425185	0.547379	0.106312	0.238415	0.467828	0.22947	0.146908	-0.019349	-0.0782181	-0.38294	-0.447814	0.0644005	-0.202527	-0.216293	-0.407868	-0.350335	-0.623305	-0.61913	-0.417954	-0.634291	-0.617922	-0.62736	-0.428987	-0.467136	-0.619041	-0.70693	-0.76012	-0.597873	-0.640238
Cela1	-0.301454	-0.422542	-0.198592	-0.650224	-0.18743	-0.145669	-0.714802	-0.691078	-0.797232	-0.785701	-0.623146	-0.360694	-0.379737	-0.0889559	0.254332	0.106788	0.153366	0.374905	-0.394644	-0.315886	0.0546502	-0.0295355	0.00784671	0.171453	0.18447	0.261927	0.530174	0.490552	0.721737	-0.00602128	0.25775	0.121905	0.547628	0.614419	0.634782	0.745735	0.388506	0.30588	0.239895	0.468416	0.361749	0.308522	0.595857	0.567112	0.493641	0.522316	0.501799
Celf1	-0.136186	-0.166954	-0.326025	-0.262321	-0.639221	-0.571638	0.214208	0.608953	0.391007	0.513443	0.323159	0.412043	0.464394	-0.201916	-0.085465	0.142645	0.248195	0.0428659	0.0949151	0.398852	0.379903	0.618131	0.852929	0.680574	0.58068	0.15515	0.390788	-0.122592	-0.125912	-0.00749486	-0.260604	-0.165467	-0.516582	-0.312187	-0.687009	-0.566199	-0.0610597	-0.606431	-0.550674	-0.773515	-0.524402	-0.578855	-0.604684	-0.725961	-0.708064	-0.526986	-0.533803
Cenpm	0.176012	0.139229	-0.0655835	0.0803593	-0.227927	-0.27976	0.453303	0.678488	0.489664	0.482726	0.243951	0.264456	0.210718	0.143646	0.0963631	0.249531	0.228006	0.0386087	0.361331	0.519011	0.143535	0.278159	0.529885	0.308444	0.221225	0.0374128	0.0427872	-0.305082	-0.330073	0.0622868	-0.176434	-0.206177	-0.349804	-0.26584	-0.561462	-0.529179	-0.352651	-0.622629	-0.613485	-0.600529	-0.403196	-0.454275	-0.55768	-0.658957	-0.722957	-0.543411	-0.589468
Cep70	0.0374554	-0.0290801	0.106709	-0.118396	0.267404	0.207538	-0.316927	-0.485776	-0.483554	-0.578224	-0.472683	-0.380574	-0.464381	0.192905	0.270095	0.093296	0.0236818	0.203804	-0.0917771	-0.196174	-0.186823	-0.346055	-0.364555	-0.26256	-0.226504	0.0490114	0.0190671	0.201604	0.322508	0.0387526	0.252379	0.0814517	0.521324	0.446212	0.583561	0.57013	0.0664112	0.294996	0.218121	0.533959	0.389669	0.372611	0.498005	0.518873	0.425192	0.402344	0.369162
Cep76	0.111857	0.149283	-0.0805494	0.202356	-0.276118	-0.271736	0.546607	0.778173	0.684521	0.740172	0.518516	0.437871	0.464201	-0.0328749	-0.151877	0.0659713	0.0929602	-0.15651	0.310244	0.45572	0.193667	0.38193	0.529793	0.319972	0.246405	-0.0433809	-0.0546013	-0.36153	-0.482229	0.0105902	-0.293284	-0.182855	-0.599539	-0.512607	-0.768741	-0.755917	-0.288293	-0.575994	-0.513136	-0.737841	-0.521362	-0.532262	-0.706669	-0.773092	-0.739337	-0.627908	-0.629704
Cer1	0.21239	0.258385	0.0568151	0.34651	-0.0293453	-0.0662384	0.549655	0.646762	0.616182	0.615053	0.430055	0.309244	0.301742	0.0876941	-0.0984186	0.0487348	0.0231679	-0.174117	0.344175	0.382115	0.0494632	0.157858	0.248409	0.0705293	0.0247819	-0.110134	-0.230786	-0.373463	-0.501134	0.0262423	-0.214185	-0.150391	-0.443326	-0.433241	-0.578359	-0.615455	-0.335708	-0.428828	-0.388318	-0.513483	-0.369177	-0.364667	-0.552091	-0.583145	-0.568838	-0.504458	-0.511864
Ces2g	-0.228142	-0.377611	-0.15575	-0.641384	-0.113528	-0.110889	-0.703286	-0.702433	-0.842452	-0.872885	-0.728708	-0.439605	-0.504411	0.0291072	0.37282	0.194017	0.203736	0.445323	-0.328992	-0.26435	0.00436356	-0.111766	-0.0292117	0.11827	0.12644	0.274245	0.514252	0.4773	0.739189	0.0242934	0.308681	0.103135	0.655094	0.704617	0.716398	0.821833	0.314505	0.273674	0.181594	0.531098	0.41394	0.345684	0.644857	0.604432	0.482222	0.538941	0.495677
Cfap97	-0.249728	-0.36316	-0.158107	-0.571553	-0.131445	-0.104599	-0.644043	-0.640352	-0.735591	-0.738162	-0.590527	-0.352829	-0.381324	-0.0479088	0.255638	0.10962	0.140043	0.349151	-0.342162	-0.284444	0.0259841	-0.0638089	-0.0282338	0.120249	0.134063	0.232042	0.458496	0.440066	0.653607	0.00132801	0.249879	0.11038	0.529557	0.579085	0.607487	0.701721	0.333802	0.286273	0.219865	0.457343	0.351667	0.302571	0.563049	0.538719	0.461988	0.487835	0.464834
Cfb	-0.15152	-0.240835	-0.0277083	-0.390757	0.0899098	0.0851329	-0.586481	-0.701149	-0.722832	-0.767974	-0.595926	-0.421927	-0.468865	0.0409256	0.255982	0.0650865	0.0527547	0.286638	-0.294997	-0.33772	-0.0972981	-0.245213	-0.275083	-0.107069	-0.067974	0.147647	0.259995	0.392896	0.574372	0.00892195	0.28892	0.134355	0.60195	0.580529	0.709845	0.751228	0.276863	0.402473	0.327214	0.608266	0.448246	0.420892	0.643712	0.656451	0.579376	0.553766	0.532636
Chchd7	-0.061406	0.00582954	-0.160777	0.0883817	-0.37669	-0.302291	0.366449	0.602274	0.570227	0.689428	0.551064	0.464937	0.562824	-0.237231	-0.302764	-0.0817657	0.00827489	-0.212669	0.108733	0.262998	0.25371	0.457504	0.508851	0.376712	0.324468	-0.0305293	0.0354822	-0.230982	-0.360845	-0.0432004	-0.306492	-0.109263	-0.630107	-0.520901	-0.719436	-0.687924	-0.0767401	-0.3979	-0.307534	-0.678365	-0.489599	-0.478688	-0.615885	-0.654799	-0.551198	-0.502266	-0.467249
Chd1l	-0.0216478	-0.18274	-0.0403846	-0.441613	0.0344349	-0.0370918	-0.455942	-0.480739	-0.65523	-0.752623	-0.697761	-0.440095	-0.572291	0.241732	0.487321	0.312939	0.252644	0.44983	-0.095411	-0.0631601	-0.0768287	-0.208471	-0.0509463	0.0115142	0.00277479	0.222499	0.345651	0.299901	0.542045	0.0759499	0.301661	0.0267752	0.640774	0.65143	0.624337	0.692792	0.0706374	0.0973118	-0.0151289	0.454102	0.364334	0.284725	0.514707	0.457723	0.278077	0.381413	0.306403
Chic2	0.0291577	0.0888508	-0.0352345	0.179254	-0.139543	-0.110471	0.319976	0.425044	0.436706	0.493052	0.396755	0.298219	0.351785	-0.101515	-0.205305	-0.0693357	-0.0343812	-0.185073	0.127758	0.182808	0.109426	0.223983	0.234759	0.14085	0.114668	-0.0715277	-0.0960942	-0.209667	-0.321895	-0.0215836	-0.200771	-0.0742151	-0.416854	-0.379505	-0.473756	-0.48263	-0.110951	-0.244323	-0.186135	-0.417267	-0.306962	-0.288982	-0.414685	-0.42509	-0.356906	-0.343595	-0.320829
Chid1	-0.0392682	0.067159	-0.103211	0.219459	-0.286465	-0.206134	0.424948	0.604591	0.644355	0.766236	0.647734	0.493622	0.612567	-0.260734	-0.394785	-0.172676	-0.0851153	-0.31484	0.109762	0.210119	0.211912	0.406538	0.386279	0.269501	0.235088	-0.101078	-0.0959756	-0.272059	-0.452372	-0.0590796	-0.329442	-0.0875786	-0.684666	-0.609059	-0.742346	-0.743612	-0.0776379	-0.320162	-0.214328	-0.651896	-0.483675	-0.447137	-0.627763	-0.635269	-0.49533	-0.497566	-0.444992
Chmp1b	-0.0530648	-0.133606	0.0529341	-0.255458	0.208709	0.172002	-0.476208	-0.637248	-0.64077	-0.718429	-0.568245	-0.432425	-0.5031	0.130833	0.278729	0.0793834	0.0324624	0.254852	-0.202656	-0.289602	-0.161455	-0.329705	-0.361734	-0.216042	-0.173754	0.0972042	0.131467	0.312633	0.470483	0.0256795	0.291044	0.117249	0.603184	0.545792	0.69672	0.707057	0.17874	0.38197	0.300501	0.620686	0.454012	0.432445	0.614446	0.635724	0.545359	0.514715	0.486234
Chn2	0.321444	0.475114	0.286119	0.765897	0.351758	0.308435	0.689205	0.557337	0.754662	0.728487	0.623166	0.30255	0.332144	0.0906989	-0.309801	-0.204588	-0.265743	-0.450371	0.354976	0.187189	-0.14521	-0.11006	-0.245548	-0.35864	-0.339655	-0.332192	-0.673121	-0.477418	-0.739164	-0.0079929	-0.22342	-0.0693671	-0.485486	-0.608755	-0.512506	-0.663958	-0.354084	-0.124485	-0.0568036	-0.29904	-0.255057	-0.173744	-0.478043	-0.404429	-0.304909	-0.4055	-0.36912
Chodl	-0.369276	-0.448603	-0.218988	-0.616114	-0.222943	-0.13996	-0.716954	-0.695574	-0.739889	-0.686565	-0.493681	-0.280722	-0.246905	-0.214956	0.105732	-0.0147846	0.0672271	0.270877	-0.466672	-0.396357	0.0857631	0.0262149	-0.0106526	0.179148	0.205033	0.225063	0.499845	0.496756	0.681579	-0.0423352	0.204762	0.152451	0.433194	0.503285	0.561288	0.66566	0.468472	0.378547	0.342926	0.431039	0.322816	0.29412	0.557671	0.553384	0.541108	0.520843	0.529477
Chordc1	-0.0703986	-0.0229566	-0.186204	0.0249233	-0.415261	-0.344954	0.33512	0.595271	0.528687	0.644887	0.498078	0.445683	0.531922	-0.222082	-0.254189	-0.0362612	0.0535967	-0.160762	0.108116	0.286519	0.270601	0.4764	0.562158	0.423702	0.363352	0.00370024	0.0978445	-0.209304	-0.313357	-0.0347672	-0.291881	-0.118863	-0.596498	-0.47249	-0.700484	-0.65366	-0.0766078	-0.431766	-0.350028	-0.683703	-0.487047	-0.488714	-0.603654	-0.657393	-0.572848	-0.499501	-0.473537
Chp2	-0.220131	-0.25861	-0.0313785	-0.332018	0.0865303	0.125271	-0.596366	-0.736387	-0.673465	-0.677351	-0.460501	-0.350536	-0.339228	-0.0926151	0.0873787	-0.0842785	-0.0619784	0.161434	-0.381006	-0.45133	-0.0833419	-0.215782	-0.345101	-0.138093	-0.0785216	0.0944392	0.199117	0.403754	0.530276	-0.032585	0.240785	0.178269	0.495423	0.465725	0.659761	0.685911	0.37016	0.518954	0.476059	0.605974	0.430683	0.435144	0.630012	0.678122	0.671255	0.578569	0.591662
Chpf	0.196554	0.232088	0.0172121	0.298104	-0.102678	-0.135	0.557298	0.699919	0.63604	0.644928	0.439206	0.339535	0.332297	0.0751617	-0.0874387	0.0794151	0.0634057	-0.150157	0.352743	0.427808	0.0907215	0.221691	0.347056	0.150917	0.0928881	-0.0827451	-0.171026	-0.376409	-0.494432	0.0288366	-0.232407	-0.169283	-0.477655	-0.443164	-0.633986	-0.654131	-0.341369	-0.497505	-0.45523	-0.586397	-0.416225	-0.421561	-0.602794	-0.65068	-0.642119	-0.551715	-0.563254
Chrm3	0.186981	0.358623	0.186644	0.659443	0.192671	0.206753	0.607246	0.535186	0.74502	0.78022	0.702176	0.38658	0.47338	-0.0780389	-0.430152	-0.28739	-0.290509	-0.488706	0.236009	0.117126	-0.0495903	0.0321234	-0.136419	-0.223516	-0.204523	-0.30492	-0.562633	-0.412869	-0.685018	-0.0460589	-0.274333	-0.0445422	-0.590003	-0.669323	-0.588046	-0.71083	-0.223191	-0.0944496	0.00130493	-0.377521	-0.314851	-0.225572	-0.512451	-0.437016	-0.285616	-0.40347	-0.342386
Cirbp	0.0943293	-0.0307239	0.124578	-0.207284	0.315477	0.208814	-0.386954	-0.565497	-0.636949	-0.783841	-0.69195	-0.52167	-0.670782	0.339271	0.469557	0.239475	0.128848	0.357446	-0.0469557	-0.145606	-0.232195	-0.436569	-0.37376	-0.281159	-0.255246	0.10996	0.0879461	0.243246	0.439247	0.080838	0.347104	0.0629561	0.723374	0.642906	0.752036	0.75185	0.0105279	0.260289	0.139976	0.648462	0.487145	0.438673	0.61874	0.612961	0.440605	0.470744	0.401958
Ckmt2	-0.305022	-0.346062	-0.0964868	-0.435254	-0.0093602	0.0588099	-0.685183	-0.789987	-0.734331	-0.708465	-0.470369	-0.335445	-0.299972	-0.176465	0.0542393	-0.108744	-0.055635	0.175842	-0.462319	-0.499429	-0.0304529	-0.14504	-0.281176	-0.0530518	0.00567607	0.130222	0.296875	0.468756	0.609315	-0.0496498	0.234587	0.195656	0.484537	0.483064	0.665167	0.71491	0.456772	0.545028	0.510007	0.595091	0.424013	0.426601	0.651611	0.695897	0.705864	0.611462	0.633443
Cks1b	0.0073607	-0.0112265	-0.203119	-0.0659512	-0.453455	-0.433561	0.362654	0.681096	0.49339	0.565723	0.349543	0.383545	0.399848	-0.06706	-0.0475515	0.161499	0.214678	-0.000420004	0.22334	0.456747	0.278296	0.48057	0.707366	0.508058	0.415206	0.0808679	0.20012	-0.231709	-0.266935	0.0170812	-0.248851	-0.185415	-0.49723	-0.349216	-0.683861	-0.609886	-0.198755	-0.619456	-0.574738	-0.732942	-0.500287	-0.545652	-0.627378	-0.733783	-0.7365	-0.566514	-0.584138
Clca3	-0.0257746	0.0970493	-0.0527275	0.282064	-0.191163	-0.113448	0.407857	0.525598	0.614542	0.726165	0.639718	0.455365	0.577911	-0.254345	-0.419026	-0.222957	-0.145207	-0.352157	0.0888692	0.138765	0.1587	0.323764	0.250667	0.162277	0.145702	-0.13884	-0.17483	-0.263089	-0.458046	-0.0655046	-0.306437	-0.0583706	-0.641903	-0.59864	-0.666604	-0.69044	-0.0601364	-0.218235	-0.11303	-0.551326	-0.419397	-0.368028	-0.556316	-0.539267	-0.387395	-0.428609	-0.368317
Clcn2	0.0407203	-0.00283745	0.151352	-0.0502727	0.350861	0.295167	-0.328051	-0.554661	-0.495919	-0.593171	-0.454087	-0.400035	-0.471554	0.178395	0.22109	0.0257783	-0.0473117	0.14931	-0.120336	-0.273326	-0.231185	-0.413028	-0.493018	-0.361567	-0.30697	0.00611665	-0.0625966	0.207478	0.30548	0.0267937	0.262976	0.112686	0.537878	0.432959	0.636815	0.600648	0.093204	0.39917	0.327248	0.617359	0.440022	0.44114	0.55346	0.601306	0.529388	0.462146	0.441108
Cldn25	-0.205876	-0.162676	-0.291885	-0.140455	-0.57222	-0.454754	0.196405	0.515496	0.435718	0.600039	0.485312	0.473051	0.598014	-0.356536	-0.307517	-0.0739584	0.0655438	-0.137773	-0.01981	0.213608	0.357414	0.593442	0.67024	0.563802	0.501316	0.0615141	0.255622	-0.107498	-0.189445	-0.0618703	-0.3039	-0.0926785	-0.618124	-0.447793	-0.697685	-0.612564	0.059988	-0.395405	-0.300712	-0.707325	-0.501959	-0.507001	-0.574517	-0.635265	-0.52386	-0.45181	-0.411803
Clec14a	-0.180195	-0.171389	0.0528952	-0.158217	0.221247	0.261635	-0.522353	-0.74321	-0.589079	-0.596633	-0.353946	-0.329425	-0.297614	-0.104837	-0.014756	-0.192162	-0.179291	0.0382115	-0.372454	-0.518303	-0.148982	-0.300657	-0.519681	-0.292596	-0.209286	0.00292165	0.022147	0.35073	0.416215	-0.0490276	0.221365	0.206066	0.446077	0.368003	0.650214	0.631717	0.360231	0.62334	0.596245	0.658842	0.452279	0.488587	0.629333	0.718096	0.751525	0.594004	0.626883
Clhc1	0.19405	0.167714	-0.0546736	0.127369	-0.221181	-0.273713	0.507573	0.734301	0.554091	0.549171	0.298134	0.297968	0.248373	0.14298	0.0704896	0.23763	0.215127	0.00691148	0.388018	0.542152	0.14413	0.288054	0.535824	0.302019	0.213545	0.0178967	0.00586552	-0.341911	-0.385932	0.0610885	-0.199911	-0.215229	-0.399446	-0.318493	-0.617193	-0.592312	-0.378252	-0.647155	-0.631365	-0.643209	-0.435968	-0.482538	-0.608312	-0.707455	-0.763247	-0.586378	-0.629721
Clmn	-0.123887	-0.0864785	0.133629	-0.0158302	0.351336	0.38029	-0.456889	-0.748469	-0.53318	-0.557074	-0.300905	-0.336173	-0.302828	-0.0762059	-0.0582263	-0.249328	-0.255865	-0.037775	-0.342663	-0.552574	-0.216733	-0.393221	-0.668244	-0.431471	-0.331195	-0.0661994	-0.124339	0.302349	0.328616	-0.0521826	0.221049	0.221177	0.43884	0.317016	0.665407	0.609597	0.326727	0.693133	0.670424	0.717745	0.483919	0.540646	0.641258	0.75827	0.808069	0.608596	0.649807
Cmah	0.186632	0.269204	0.0717875	0.415589	-0.00573086	-0.0197887	0.566083	0.635617	0.666848	0.686827	0.52796	0.355264	0.382401	0.0159005	-0.208515	-0.0502823	-0.0596819	-0.266323	0.304997	0.314387	0.0449478	0.15932	0.181312	0.0254857	-0.00550558	-0.157309	-0.300027	-0.382958	-0.553128	0.00149207	-0.246284	-0.123883	-0.515167	-0.518588	-0.614556	-0.668766	-0.292823	-0.353051	-0.291842	-0.51156	-0.379357	-0.351855	-0.566983	-0.571962	-0.512601	-0.495246	-0.480859
Cmc2	0.0349322	0.103721	-0.122794	0.197492	-0.348613	-0.302782	0.533924	0.785912	0.731518	0.831189	0.630972	0.519802	0.5951	-0.158089	-0.279792	-0.0301703	0.0353988	-0.234182	0.23939	0.396638	0.243798	0.464283	0.560682	0.369671	0.302377	-0.0591186	-0.0431136	-0.347305	-0.501831	-0.0220851	-0.346295	-0.16114	-0.71176	-0.608545	-0.851439	-0.834267	-0.208758	-0.535554	-0.444892	-0.79866	-0.573204	-0.567118	-0.754878	-0.807288	-0.720821	-0.641736	-0.618808
Cml2	-0.198532	-0.337101	-0.108468	-0.576535	-0.0312177	-0.0374696	-0.690765	-0.736571	-0.844445	-0.888485	-0.730126	-0.466154	-0.53464	0.0537331	0.365625	0.168972	0.16504	0.418241	-0.321199	-0.2958	-0.0413479	-0.179848	-0.128113	0.0313305	0.0506313	0.241847	0.440982	0.466021	0.715082	0.0245436	0.32387	0.116585	0.683053	0.705695	0.76045	0.846061	0.303343	0.329301	0.23502	0.594668	0.454391	0.395788	0.682373	0.658003	0.539118	0.572288	0.531618
Cml5	-0.157523	-0.255008	-0.0238909	-0.417513	0.107918	0.0998082	-0.633259	-0.762297	-0.785249	-0.837582	-0.651303	-0.463339	-0.517072	0.0530012	0.283385	0.0735604	0.0570369	0.312272	-0.314961	-0.36504	-0.111741	-0.275424	-0.307526	-0.125655	-0.0827568	0.158052	0.274903	0.423692	0.62093	0.0114248	0.316869	0.145396	0.659975	0.633724	0.776522	0.819478	0.29459	0.438111	0.354967	0.666969	0.491359	0.461623	0.702548	0.7169	0.63091	0.602992	0.579007
Cmtm4	0.0568232	0.0248663	0.210841	0.00387067	0.468479	0.405675	-0.370796	-0.673625	-0.56442	-0.679305	-0.499058	-0.468633	-0.542795	0.1993	0.217002	-0.0186286	-0.106941	0.127036	-0.14944	-0.361948	-0.299774	-0.52411	-0.659675	-0.491092	-0.415443	-0.028474	-0.141125	0.232784	0.325284	0.0231009	0.306073	0.149035	0.622045	0.478392	0.759691	0.69955	0.116906	0.526601	0.448124	0.761682	0.536024	0.550985	0.665415	0.73999	0.673137	0.564209	0.54856
Cnih1	-0.101867	0.0272815	-0.122269	0.210254	-0.308627	-0.198369	0.376066	0.546876	0.628413	0.777621	0.694246	0.519169	0.672903	-0.350001	-0.481931	-0.254658	-0.141769	-0.366326	0.0336081	0.126122	0.22871	0.430389	0.355178	0.270299	0.247866	-0.114664	-0.0940916	-0.23573	-0.434671	-0.0847406	-0.345519	-0.0552678	-0.720932	-0.643479	-0.740981	-0.742868	0.0029775	-0.237709	-0.11574	-0.633257	-0.477932	-0.426183	-0.605759	-0.595188	-0.417116	-0.455905	-0.383966
Cnpy3	0.182932	0.192137	-0.0444419	0.208422	-0.216324	-0.249399	0.566352	0.784007	0.65242	0.66918	0.424235	0.370706	0.352956	0.080025	-0.0376288	0.155094	0.1477	-0.0876088	0.379381	0.51731	0.152102	0.314476	0.512197	0.281718	0.201039	-0.0289772	-0.0642071	-0.379832	-0.471316	0.0404931	-0.249937	-0.205775	-0.507345	-0.433261	-0.706424	-0.696899	-0.364913	-0.623043	-0.584468	-0.695412	-0.483207	-0.509962	-0.674632	-0.755215	-0.768996	-0.625847	-0.650236
Cog8	0.189128	0.213942	0.0157545	0.262644	-0.0940312	-0.129841	0.509771	0.64411	0.57303	0.5752	0.380763	0.299525	0.284377	0.0879969	-0.0548533	0.0947237	0.0751556	-0.118263	0.334415	0.407373	0.0811855	0.198626	0.327975	0.14316	0.0870848	-0.0673152	-0.146303	-0.344895	-0.444342	0.0324227	-0.205098	-0.161054	-0.420375	-0.387409	-0.571486	-0.587414	-0.325077	-0.471634	-0.437812	-0.535313	-0.377569	-0.387225	-0.548322	-0.597389	-0.599958	-0.507351	-0.522949
Col14a1	-0.250935	-0.304525	-0.0998227	-0.411624	-0.0402557	0.00875458	-0.582749	-0.645482	-0.635317	-0.619598	-0.436321	-0.293695	-0.278669	-0.121596	0.0966652	-0.039651	0.0010441	0.195424	-0.370442	-0.378187	-0.0112724	-0.103692	-0.178367	-0.000993519	0.0384544	0.138511	0.298402	0.398612	0.538463	-0.030396	0.206248	0.14787	0.429398	0.441367	0.559917	0.614395	0.365039	0.406228	0.368272	0.479105	0.347847	0.337116	0.540759	0.561757	0.548951	0.497514	0.505385
Comt	0.0914249	-0.0291027	0.0824638	-0.204038	0.218191	0.121053	-0.297615	-0.409878	-0.509724	-0.6354	-0.587563	-0.422334	-0.559823	0.308121	0.432788	0.253482	0.158444	0.334971	-0.00326428	-0.0554706	-0.169985	-0.32654	-0.227667	-0.1762	-0.168177	0.116661	0.115749	0.186252	0.363667	0.0791639	0.282049	0.0261692	0.591512	0.541467	0.585318	0.597675	-0.0266949	0.134914	0.0297458	0.479852	0.369286	0.315885	0.469876	0.445846	0.283355	0.341507	0.273712
Copg1	0.124004	0.178108	-0.0675788	0.259507	-0.265571	-0.257555	0.600933	0.82894	0.754889	0.816432	0.58803	0.478223	0.514955	-0.0469954	-0.196887	0.0362904	0.0654162	-0.203622	0.328121	0.465025	0.19352	0.391755	0.523156	0.305737	0.233708	-0.0705481	-0.102223	-0.39808	-0.54467	0.00483093	-0.321517	-0.186495	-0.659966	-0.578325	-0.828309	-0.825621	-0.304441	-0.585174	-0.512161	-0.778007	-0.554357	-0.556727	-0.757416	-0.816997	-0.767072	-0.666894	-0.662058
Cops2	-0.204799	-0.295956	-0.0729819	-0.456713	0.019857	0.034109	-0.634238	-0.719939	-0.750004	-0.774774	-0.593996	-0.403823	-0.435061	-0.0135504	0.233601	0.0527878	0.061049	0.295238	-0.341359	-0.358242	-0.0580016	-0.190241	-0.219749	-0.0427361	-0.00613534	0.171668	0.32545	0.428598	0.617915	-0.0015397	0.27942	0.141338	0.583872	0.583358	0.698079	0.75582	0.32711	0.405633	0.336398	0.585375	0.433043	0.403628	0.643455	0.651585	0.585239	0.562052	0.546223
Cops6	0.0843193	0.0928411	-0.136355	0.0923164	-0.366372	-0.361573	0.502107	0.787416	0.636289	0.696147	0.457412	0.429829	0.444919	-0.0296212	-0.0919631	0.131957	0.166476	-0.0813968	0.30415	0.499163	0.23851	0.441303	0.645577	0.422337	0.333382	0.014299	0.0585698	-0.329292	-0.412878	0.0200226	-0.284459	-0.200947	-0.575467	-0.456537	-0.770078	-0.728494	-0.280887	-0.644709	-0.590607	-0.778119	-0.540059	-0.570785	-0.712104	-0.804412	-0.794372	-0.641976	-0.655565
Copz1	0.101044	0.173544	-0.058196	0.284071	-0.243533	-0.221874	0.580866	0.784238	0.748481	0.82033	0.617615	0.483873	0.539541	-0.0886406	-0.252103	-0.0226088	0.0154692	-0.24677	0.288614	0.40428	0.184144	0.377629	0.463892	0.269343	0.208884	-0.0931731	-0.134002	-0.383792	-0.547699	-0.0100645	-0.325847	-0.16257	-0.672189	-0.600928	-0.812231	-0.81865	-0.26369	-0.51526	-0.4334	-0.742935	-0.535922	-0.525131	-0.731779	-0.773979	-0.699998	-0.631127	-0.613779
Copz2	0.235499	0.34581	0.110885	0.542714	0.0346509	0.016941	0.692627	0.751013	0.812833	0.833836	0.652213	0.424082	0.460342	0.0199306	-0.271802	-0.0871059	-0.102378	-0.348227	0.366515	0.355471	0.0325298	0.161349	0.163484	-0.0160966	-0.046222	-0.212188	-0.406919	-0.469623	-0.687615	-0.00176287	-0.295509	-0.13961	-0.620594	-0.639172	-0.728009	-0.805263	-0.352804	-0.389837	-0.313774	-0.588789	-0.441448	-0.400314	-0.670347	-0.665061	-0.585053	-0.581958	-0.560123
Cox18	0.222594	0.208652	-0.0288416	0.192218	-0.188097	-0.245186	0.564189	0.777979	0.614444	0.606122	0.346772	0.320076	0.271927	0.153397	0.0471685	0.22159	0.192936	-0.0294481	0.418289	0.557017	0.129661	0.274992	0.511358	0.268561	0.181979	-0.0101118	-0.0519117	-0.381326	-0.446544	0.0609866	-0.21654	-0.220661	-0.435835	-0.366246	-0.6556	-0.643884	-0.408731	-0.655639	-0.634907	-0.663864	-0.454149	-0.494008	-0.644757	-0.737503	-0.785952	-0.617675	-0.658366
Cox5b	0.089877	0.242129	0.0913088	0.496404	0.0471133	0.0895863	0.497482	0.491346	0.660123	0.726384	0.658029	0.397365	0.500707	-0.156361	-0.426901	-0.27172	-0.240882	-0.431053	0.155462	0.0978933	0.0278862	0.135704	-0.00573589	-0.0810825	-0.0721502	-0.236825	-0.402612	-0.332635	-0.569793	-0.0567864	-0.275792	-0.0390421	-0.587727	-0.620986	-0.585595	-0.668842	-0.13675	-0.111469	-0.0131903	-0.413517	-0.333555	-0.25778	-0.49678	-0.440424	-0.286823	-0.381892	-0.319267
Cox6b2	0.163496	0.228846	0.0255037	0.341364	-0.0851649	-0.0953243	0.548648	0.665526	0.655705	0.684029	0.508162	0.368997	0.392856	0.00682256	-0.180239	-0.00863195	-0.00856703	-0.222969	0.30365	0.354117	0.0872334	0.220285	0.283108	0.113053	0.0693107	-0.118115	-0.218696	-0.368907	-0.518533	0.00589472	-0.252836	-0.14047	-0.524516	-0.500882	-0.64474	-0.677388	-0.289163	-0.416131	-0.357112	-0.567216	-0.412356	-0.398105	-0.595448	-0.619925	-0.572346	-0.524801	-0.516937
Cox8a	0.00949575	0.124595	0.00130467	0.305806	-0.0837408	-0.0269362	0.365307	0.421875	0.527463	0.608998	0.546661	0.364782	0.464956	-0.190652	-0.363194	-0.212055	-0.159604	-0.326634	0.08766	0.0929961	0.0914803	0.211486	0.121447	0.0554462	0.0513775	-0.150114	-0.221357	-0.238971	-0.418181	-0.0548653	-0.248124	-0.0387578	-0.523359	-0.512238	-0.530855	-0.570506	-0.0664193	-0.137891	-0.0503038	-0.413647	-0.321905	-0.269115	-0.443307	-0.413982	-0.281969	-0.338436	-0.285
Cox8b	-0.181025	-0.286941	-0.0865417	-0.471614	-0.0147313	-0.0118031	-0.593048	-0.645258	-0.714016	-0.744753	-0.596683	-0.388299	-0.434693	0.0202492	0.275158	0.107895	0.110097	0.326868	-0.293559	-0.284008	-0.0394947	-0.158393	-0.140906	0.00645732	0.0293065	0.190673	0.3535	0.400588	0.60011	0.0118716	0.269598	0.11191	0.566843	0.58025	0.64832	0.715316	0.279331	0.317159	0.243103	0.519715	0.392339	0.350623	0.58839	0.577841	0.491945	0.501831	0.474942
Cpm	-0.129085	-0.000459301	-0.0971591	0.183774	-0.23495	-0.122181	0.257897	0.367472	0.484493	0.623982	0.596426	0.427388	0.581406	-0.353917	-0.469269	-0.290297	-0.181642	-0.351055	-0.0425176	0.0085218	0.180381	0.339016	0.215035	0.182357	0.180172	-0.116737	-0.101483	-0.157584	-0.338645	-0.0917414	-0.284518	-0.00813198	-0.59768	-0.544652	-0.571695	-0.581456	0.0745815	-0.0894886	0.0220987	-0.461965	-0.359468	-0.300087	-0.446955	-0.415164	-0.235881	-0.310581	-0.233909
Cpq	-0.133666	-0.204626	0.00649585	-0.320652	0.144198	0.139258	-0.554885	-0.701445	-0.687843	-0.735151	-0.553964	-0.413704	-0.453362	0.038465	0.217311	0.0242049	0.00742345	0.238526	-0.289127	-0.361734	-0.123852	-0.279465	-0.343594	-0.168646	-0.120451	0.11131	0.188982	0.370256	0.527664	0.00305625	0.281268	0.1444	0.582537	0.541777	0.705153	0.728679	0.270342	0.44139	0.372082	0.628135	0.456176	0.441149	0.642068	0.670522	0.608572	0.558118	0.544378
Cpsf3	0.143218	0.178917	-0.0223906	0.237965	-0.161207	-0.174325	0.504234	0.667711	0.602024	0.630325	0.438517	0.351715	0.361014	0.0201038	-0.113191	0.0598997	0.0636776	-0.145776	0.301344	0.395833	0.123466	0.266047	0.38432	0.201849	0.143849	-0.0629199	-0.114015	-0.33739	-0.448918	0.0171962	-0.238213	-0.157663	-0.488709	-0.437281	-0.633653	-0.640011	-0.286494	-0.478952	-0.430763	-0.594305	-0.421713	-0.427168	-0.591389	-0.640553	-0.619484	-0.532102	-0.537164
Cpsf4	0.221178	0.166928	-0.0646371	0.0826128	-0.240314	-0.312322	0.510582	0.761895	0.531455	0.509452	0.232148	0.269874	0.192234	0.203358	0.155895	0.318305	0.281968	0.0755821	0.429594	0.607426	0.148826	0.290942	0.596124	0.339515	0.237952	0.0522622	0.0540711	-0.345316	-0.359076	0.081719	-0.180297	-0.240792	-0.354546	-0.26268	-0.604715	-0.567349	-0.422582	-0.720056	-0.719708	-0.659261	-0.438273	-0.503082	-0.612214	-0.733058	-0.824556	-0.608262	-0.669287
Cpsf6	-0.182658	-0.120655	-0.210438	-0.0576028	-0.41394	-0.30499	0.149511	0.366467	0.357901	0.500119	0.439149	0.389721	0.513442	-0.332165	-0.322271	-0.139374	-0.0195005	-0.176822	-0.0557433	0.0968059	0.266291	0.447759	0.447034	0.388802	0.354713	0.0102041	0.142092	-0.0805119	-0.174875	-0.0680949	-0.252098	-0.044755	-0.518006	-0.400191	-0.5456	-0.494309	0.0891019	-0.22697	-0.138923	-0.522865	-0.380512	-0.365385	-0.435103	-0.458841	-0.337296	-0.323146	-0.274544
Creb3	0.00334673	-0.109022	0.0598539	-0.277638	0.213344	0.145396	-0.445932	-0.587858	-0.648236	-0.754318	-0.641452	-0.468678	-0.579053	0.225517	0.387824	0.180921	0.10901	0.330676	-0.129948	-0.198427	-0.170771	-0.345868	-0.308471	-0.195983	-0.168919	0.126998	0.159578	0.289152	0.47809	0.0547435	0.315132	0.0819505	0.657532	0.604964	0.708092	0.726265	0.101333	0.287956	0.186296	0.603448	0.452108	0.409726	0.602133	0.598989	0.46209	0.478291	0.426567
Creb3l3	0.00150981	-0.0837938	0.10475	-0.20429	0.297529	0.237066	-0.457906	-0.660173	-0.657017	-0.762615	-0.612456	-0.482998	-0.576568	0.200818	0.325585	0.101401	0.0285708	0.266137	-0.165283	-0.284998	-0.214606	-0.411415	-0.443692	-0.298481	-0.251123	0.0796009	0.0723748	0.295895	0.457532	0.0395298	0.322232	0.116842	0.666269	0.582922	0.75819	0.752215	0.135429	0.40208	0.307862	0.687637	0.501721	0.480116	0.65719	0.683995	0.574385	0.540638	0.503769
Crebrf	-0.191513	-0.171514	0.0620834	-0.140068	0.240996	0.288502	-0.534874	-0.774139	-0.595379	-0.598261	-0.339027	-0.329771	-0.287507	-0.12668	-0.0463009	-0.227938	-0.211068	0.0120954	-0.39558	-0.557028	-0.15846	-0.315206	-0.562869	-0.321056	-0.230034	-0.0122729	-0.00129214	0.359368	0.414435	-0.0575611	0.221091	0.221411	0.44336	0.357028	0.665489	0.640259	0.383736	0.669551	0.647119	0.686319	0.467733	0.512325	0.649358	0.749496	0.7968	0.619221	0.659451
Creld2	0.171844	0.198221	-0.0532673	0.239883	-0.24191	-0.262068	0.607777	0.838327	0.722248	0.755584	0.504901	0.427306	0.428299	0.0388735	-0.0975921	0.118797	0.123767	-0.13514	0.380095	0.523074	0.173021	0.3557	0.538091	0.301251	0.22009	-0.0467519	-0.0840145	-0.40593	-0.52249	0.0295895	-0.287871	-0.208583	-0.587113	-0.507595	-0.784406	-0.777639	-0.361687	-0.63842	-0.585496	-0.757837	-0.531719	-0.550597	-0.737077	-0.813466	-0.804689	-0.670855	-0.685762
Crim1	-0.0780146	-0.0704385	0.143239	-0.0435124	0.366953	0.367852	-0.451941	-0.736029	-0.567497	-0.619025	-0.387101	-0.386278	-0.389392	0.00960279	0.0451053	-0.161605	-0.191558	0.0360128	-0.29037	-0.489858	-0.233043	-0.423329	-0.642577	-0.42687	-0.337145	-0.0380245	-0.0973739	0.295984	0.354781	-0.026708	0.254425	0.197161	0.511608	0.390463	0.706776	0.657352	0.269345	0.632842	0.589592	0.732448	0.503447	0.542104	0.658986	0.756981	0.763959	0.601637	0.622217
Crot	-0.162781	-0.13962	0.0495886	-0.103625	0.193263	0.237307	-0.429922	-0.625525	-0.470294	-0.466978	-0.252912	-0.254562	-0.212637	-0.11987	-0.0605526	-0.203575	-0.18535	-0.0078775	-0.328891	-0.46239	-0.125385	-0.249016	-0.461514	-0.262229	-0.186364	-0.0174547	-0.0100174	0.289418	0.325829	-0.0518864	0.170611	0.183628	0.340726	0.270196	0.526687	0.50421	0.320386	0.553139	0.539637	0.550154	0.372694	0.412914	0.518761	0.604036	0.65171	0.499922	0.536929
Cryz	-0.14864	-0.297196	-0.0934978	-0.548355	-0.0197737	-0.0456581	-0.627066	-0.661873	-0.795463	-0.855364	-0.729027	-0.461021	-0.54999	0.110833	0.409232	0.218996	0.198768	0.436333	-0.255167	-0.223108	-0.0481365	-0.183844	-0.0949396	0.0347787	0.0443283	0.24228	0.424425	0.420931	0.672333	0.040973	0.319363	0.0884134	0.675414	0.697445	0.722598	0.806016	0.235272	0.254657	0.153716	0.551242	0.427525	0.360554	0.634322	0.597688	0.457862	0.516003	0.463756
Cryzl1	-0.202717	-0.284392	-0.0815454	-0.43127	-0.007544	0.0124053	-0.583856	-0.650178	-0.679361	-0.693803	-0.5288	-0.353616	-0.375382	-0.0328424	0.199217	0.0414918	0.0565802	0.265803	-0.322354	-0.328347	-0.0375309	-0.14988	-0.176928	-0.0152388	0.0167255	0.161572	0.313817	0.395822	0.567312	-0.00548848	0.245782	0.129135	0.514173	0.521183	0.618933	0.676284	0.311086	0.364446	0.305038	0.514638	0.381208	0.35445	0.574587	0.580478	0.525657	0.505266	0.493319
Csde1	-0.0692412	-0.171341	0.0265539	-0.331052	0.173482	0.133674	-0.528666	-0.670286	-0.706722	-0.787904	-0.638774	-0.46484	-0.547258	0.14387	0.331808	0.123065	0.0764269	0.313482	-0.216103	-0.281297	-0.147779	-0.318936	-0.320416	-0.173959	-0.137794	0.135152	0.201225	0.348572	0.537163	0.0333	0.31468	0.113671	0.655414	0.611759	0.73972	0.766372	0.191247	0.365774	0.273872	0.637135	0.47217	0.437944	0.649343	0.65726	0.547015	0.537978	0.500632
Csf2ra	0.0579573	0.228379	0.105564	0.51168	0.0857217	0.143158	0.445037	0.399447	0.615377	0.690143	0.662247	0.379832	0.502726	-0.200935	-0.479564	-0.340238	-0.300815	-0.469868	0.0945695	0.00595614	0.00739338	0.099858	-0.0993093	-0.137937	-0.112284	-0.259091	-0.433904	-0.296788	-0.546316	-0.0738574	-0.264621	-0.00265823	-0.568586	-0.617799	-0.526011	-0.619807	-0.0756487	-0.00305107	0.101585	-0.334846	-0.284937	-0.194111	-0.429955	-0.350899	-0.172573	-0.308144	-0.231602
Csnk1g1	-0.167536	-0.208367	0.0189942	-0.276902	0.171546	0.188479	-0.572891	-0.75234	-0.680487	-0.70988	-0.493631	-0.393306	-0.40215	-0.0287849	0.125676	-0.0675728	-0.0693244	0.166114	-0.344062	-0.446417	-0.133455	-0.291631	-0.423515	-0.217663	-0.153039	0.0744686	0.137608	0.383803	0.51068	-0.0203601	0.266757	0.17766	0.547536	0.492701	0.710699	0.720223	0.327843	0.53739	0.483775	0.664526	0.471833	0.47738	0.664454	0.718722	0.695863	0.598659	0.604749
Csnk2b	-0.137015	-0.041749	-0.207353	0.0757726	-0.457474	-0.342999	0.355571	0.618209	0.617952	0.780555	0.659168	0.54757	0.691955	-0.358086	-0.422295	-0.167953	-0.0397417	-0.282396	0.0428581	0.214368	0.308018	0.546061	0.554274	0.437019	0.388722	-0.040951	0.0562146	-0.217903	-0.378252	-0.0737777	-0.359728	-0.0917313	-0.742111	-0.613462	-0.806898	-0.768477	-0.00215537	-0.370712	-0.253688	-0.747917	-0.546422	-0.521012	-0.669827	-0.6982	-0.545538	-0.523036	-0.465242
Ctage5	-0.0122627	-0.0844596	0.0679732	-0.189629	0.212802	0.16812	-0.380211	-0.52933	-0.535832	-0.615806	-0.496526	-0.38328	-0.456526	0.15063	0.263554	0.0872392	0.0338967	0.22382	-0.141351	-0.225694	-0.158209	-0.310532	-0.328907	-0.213051	-0.177705	0.0754993	0.0846297	0.24704	0.382357	0.030841	0.256634	0.0922266	0.531679	0.473177	0.602936	0.604938	0.118409	0.31266	0.237423	0.539487	0.395293	0.375088	0.523908	0.54109	0.452495	0.431324	0.401343
Ctnna1	0.0014594	-0.105729	0.0468502	-0.267947	0.181229	0.118413	-0.40947	-0.530024	-0.594993	-0.691765	-0.593221	-0.427693	-0.530941	0.208767	0.364405	0.177261	0.112081	0.313351	-0.115844	-0.17038	-0.149077	-0.306171	-0.261699	-0.162829	-0.141009	0.124359	0.161521	0.265825	0.443576	0.0521134	0.288035	0.0704399	0.601938	0.55887	0.642588	0.66336	0.0898823	0.247986	0.153759	0.541146	0.407454	0.365443	0.544967	0.537568	0.408264	0.430479	0.381009
Cuedc2	-0.06989	0.0180411	-0.112548	0.138867	-0.276484	-0.196773	0.31245	0.474626	0.506532	0.620554	0.533035	0.414906	0.524598	-0.253607	-0.343609	-0.156462	-0.0704449	-0.256589	0.053948	0.149898	0.197228	0.3655	0.343346	0.257042	0.228868	-0.0695952	-0.0394928	-0.196491	-0.34057	-0.0569432	-0.275288	-0.0636883	-0.57145	-0.497488	-0.61064	-0.602145	-0.0250598	-0.249762	-0.158407	-0.541733	-0.401761	-0.371617	-0.508469	-0.515342	-0.391128	-0.395441	-0.347491
Cul2	-0.0332426	-0.0273076	-0.200213	-0.0448365	-0.439983	-0.397985	0.330155	0.623096	0.484291	0.574899	0.393254	0.397882	0.442866	-0.133952	-0.127031	0.0806767	0.150158	-0.0575714	0.163402	0.374609	0.275014	0.475426	0.642944	0.474541	0.396146	0.0550882	0.170312	-0.208031	-0.265731	-0.00487551	-0.258659	-0.153307	-0.521523	-0.382588	-0.670227	-0.60507	-0.136216	-0.52939	-0.471172	-0.695893	-0.482408	-0.510649	-0.598196	-0.682741	-0.650868	-0.521497	-0.521325
Cuta	0.102781	0.203509	-0.00809942	0.364789	-0.150458	-0.122387	0.570942	0.709074	0.740172	0.810968	0.646788	0.466951	0.538929	-0.110365	-0.314994	-0.104562	-0.0689657	-0.314274	0.254675	0.31494	0.135395	0.304854	0.318362	0.157555	0.11851	-0.14414	-0.229342	-0.378749	-0.571423	-0.0251572	-0.317293	-0.126471	-0.660811	-0.623218	-0.757998	-0.790737	-0.231356	-0.395808	-0.306742	-0.652486	-0.482354	-0.449781	-0.673317	-0.683918	-0.582375	-0.565825	-0.5334
Cyp2c67	-0.260419	-0.329773	-0.114338	-0.463851	-0.0565454	-0.01111	-0.624726	-0.678966	-0.690305	-0.679295	-0.494162	-0.324343	-0.319133	-0.108107	0.138184	-0.00866263	0.0304332	0.238839	-0.381325	-0.377456	-0.00702725	-0.105312	-0.160399	0.0199357	0.0562588	0.164509	0.344372	0.426979	0.589924	-0.0244069	0.227966	0.147488	0.476488	0.495548	0.602449	0.667236	0.374668	0.402807	0.356102	0.50305	0.369352	0.349907	0.575837	0.588598	0.560415	0.522585	0.523806
Cyp2j9	-0.31954	-0.285418	-0.059767	-0.25256	0.0298823	0.134683	-0.568398	-0.709171	-0.543501	-0.478598	-0.221	-0.201413	-0.102773	-0.296071	-0.165723	-0.285025	-0.205893	-0.022764	-0.48108	-0.56526	-0.0310671	-0.117532	-0.366805	-0.125636	-0.0466802	0.0253093	0.132044	0.392504	0.434079	-0.0915073	0.141337	0.221291	0.281496	0.256521	0.50714	0.519273	0.483747	0.618474	0.628262	0.518056	0.347149	0.393153	0.537285	0.625131	0.721036	0.549389	0.61069
Cyp39a1	-0.0677951	-0.153849	0.00285362	-0.291332	0.107394	0.0791524	-0.430391	-0.526294	-0.567569	-0.627278	-0.512491	-0.363163	-0.427624	0.105176	0.268599	0.107741	0.0757998	0.261943	-0.177572	-0.21489	-0.100944	-0.229817	-0.219679	-0.106217	-0.0813181	0.12104	0.190135	0.284988	0.441367	0.0263978	0.246938	0.0865314	0.515713	0.491035	0.577673	0.606761	0.15894	0.273437	0.200578	0.487836	0.364016	0.33293	0.507765	0.508114	0.418609	0.420058	0.389239
Cyp4v3	-0.236396	-0.280421	-0.0422083	-0.36458	0.0754614	0.116982	-0.631754	-0.769875	-0.711831	-0.714339	-0.489301	-0.366713	-0.355537	-0.0991668	0.0979138	-0.0803259	-0.0550124	0.178853	-0.401555	-0.46748	-0.0794658	-0.215332	-0.343351	-0.128125	-0.0679153	0.107334	0.225966	0.42815	0.5656	-0.033396	0.252465	0.184473	0.520285	0.494359	0.68922	0.72106	0.390574	0.534105	0.488428	0.627439	0.447261	0.44929	0.658162	0.704938	0.695264	0.603687	0.616138
Cytl1	-0.236807	-0.312505	-0.074924	-0.450558	0.0235729	0.0539055	-0.663108	-0.763945	-0.762616	-0.773964	-0.568678	-0.395475	-0.40683	-0.0617983	0.180987	-0.00105276	0.0195487	0.260041	-0.386412	-0.416073	-0.0575556	-0.190646	-0.259352	-0.0602254	-0.0140676	0.157544	0.312732	0.449497	0.625756	-0.0167998	0.273947	0.163874	0.570067	0.565146	0.710427	0.763944	0.374082	0.467668	0.407357	0.61162	0.446313	0.427842	0.666579	0.688809	0.64565	0.595753	0.591949
D1Ertd622e	0.2361	0.331492	0.174535	0.513104	0.18963	0.154284	0.524078	0.475728	0.574902	0.558225	0.450955	0.243915	0.25613	0.0784178	-0.190943	-0.0959413	-0.138048	-0.290446	0.28868	0.205473	-0.0694383	-0.023215	-0.0721017	-0.181688	-0.183413	-0.211295	-0.432047	-0.361374	-0.537574	0.00386967	-0.176756	-0.0784256	-0.378459	-0.444562	-0.429861	-0.523284	-0.286364	-0.182228	-0.135554	-0.296138	-0.234657	-0.189366	-0.405521	-0.373615	-0.3173	-0.354597	-0.337544
D2Wsu81e	0.123877	0.158181	-0.0379844	0.212265	-0.184212	-0.190926	0.483068	0.655409	0.586672	0.621492	0.434091	0.354267	0.36848	0.00200238	-0.118574	0.0563166	0.0669679	-0.140399	0.283138	0.38604	0.135971	0.282614	0.400782	0.222777	0.164256	-0.0535061	-0.0895903	-0.321954	-0.42927	0.0137331	-0.238977	-0.154167	-0.489718	-0.431377	-0.631622	-0.632076	-0.267126	-0.474502	-0.424914	-0.596921	-0.423071	-0.429465	-0.586022	-0.636652	-0.612613	-0.524608	-0.52806
D830013O20Rik	-0.25548	-0.326972	-0.0808706	-0.459944	0.0181771	0.0561521	-0.684867	-0.78907	-0.777949	-0.782878	-0.566194	-0.395222	-0.398436	-0.084149	0.162999	-0.0204635	0.00656431	0.251863	-0.410456	-0.44221	-0.0541618	-0.187458	-0.270124	-0.0604494	-0.0108016	0.156877	0.318335	0.465024	0.639585	-0.0231711	0.274176	0.173979	0.569893	0.565492	0.721254	0.775547	0.399022	0.49408	0.436714	0.624957	0.454207	0.439026	0.681699	0.708483	0.673739	0.614509	0.615248
D930015E06Rik	-0.123699	-0.269914	-0.102967	-0.517582	-0.0577907	-0.0870998	-0.539883	-0.539144	-0.69242	-0.747814	-0.659023	-0.3999	-0.489753	0.118139	0.398864	0.240095	0.220427	0.420476	-0.199036	-0.144285	-0.0217001	-0.130538	-0.0121561	0.082213	0.0792269	0.237907	0.416464	0.362732	0.598972	0.0460576	0.278294	0.0569732	0.591942	0.626652	0.608955	0.69444	0.181778	0.158214	0.0643271	0.439686	0.349741	0.279029	0.527018	0.478039	0.337932	0.41762	0.362437
Dad1	-0.0499861	0.0587505	-0.135712	0.2101	-0.355673	-0.266531	0.469443	0.693068	0.714613	0.85242	0.709422	0.555141	0.683554	-0.288235	-0.420105	-0.166395	-0.0661795	-0.326507	0.127676	0.259803	0.255221	0.480661	0.481786	0.342283	0.296893	-0.0929998	-0.0684149	-0.299558	-0.489436	-0.0618107	-0.369329	-0.108091	-0.765305	-0.668219	-0.842486	-0.833569	-0.0910875	-0.393555	-0.277804	-0.755083	-0.555654	-0.522396	-0.715461	-0.734529	-0.587014	-0.572284	-0.518253
Dak	0.00117682	-0.116964	0.038562	-0.297439	0.170252	0.103137	-0.426617	-0.539168	-0.6212	-0.722303	-0.627208	-0.444246	-0.555767	0.223143	0.394714	0.20277	0.135043	0.34222	-0.114162	-0.159655	-0.145872	-0.305316	-0.243505	-0.147064	-0.128706	0.140879	0.189077	0.277249	0.469379	0.0577278	0.299778	0.0661815	0.62784	0.589799	0.661416	0.688676	0.0873162	0.2346	0.134434	0.547619	0.415374	0.366824	0.558319	0.54395	0.402791	0.437016	0.38206
Dalrd3	0.0541263	0.232434	0.107719	0.528229	0.0873474	0.149452	0.454941	0.406452	0.633852	0.713541	0.688314	0.394365	0.524593	-0.215845	-0.503725	-0.359573	-0.316572	-0.490492	0.0903554	-0.002374	0.00871772	0.104611	-0.106743	-0.143392	-0.115607	-0.269236	-0.448731	-0.303066	-0.562682	-0.0787495	-0.274619	0.000550295	-0.590291	-0.641249	-0.542487	-0.639634	-0.0704259	0.0055128	0.115096	-0.343185	-0.293178	-0.197802	-0.441378	-0.357801	-0.169928	-0.313741	-0.232797
Dap	0.409485	0.442319	0.203131	0.536486	0.195711	0.08139	0.708242	0.722747	0.686834	0.604981	0.374389	0.22562	0.145878	0.312672	0.0364956	0.144738	0.0401512	-0.154945	0.526274	0.492217	-0.0812126	-0.0283355	0.0990403	-0.123067	-0.168771	-0.167226	-0.417889	-0.49318	-0.62564	0.075485	-0.166475	-0.189927	-0.347034	-0.400598	-0.524134	-0.607899	-0.532944	-0.484716	-0.475539	-0.441519	-0.315428	-0.316348	-0.54831	-0.578136	-0.624619	-0.542353	-0.579674
Dbi	0.0714704	0.14977	-0.0440973	0.269982	-0.197961	-0.168264	0.497495	0.657997	0.656115	0.727553	0.568425	0.431733	0.495574	-0.11055	-0.265464	-0.0656339	-0.025073	-0.251414	0.224299	0.309974	0.155345	0.322541	0.363727	0.209629	0.165204	-0.09985	-0.143032	-0.327912	-0.486109	-0.0204335	-0.291144	-0.125035	-0.603153	-0.548276	-0.704898	-0.717639	-0.201324	-0.400872	-0.321715	-0.62896	-0.459029	-0.439291	-0.626436	-0.650227	-0.566239	-0.529689	-0.504668
Dcaf11	-0.140406	-0.180668	0.0232399	-0.246657	0.164682	0.174631	-0.512627	-0.677272	-0.616852	-0.648918	-0.457044	-0.363767	-0.377771	-0.0100171	0.128329	-0.0494736	-0.0560554	0.158072	-0.300137	-0.394336	-0.126954	-0.273413	-0.386221	-0.203409	-0.145904	0.0680943	0.120583	0.342667	0.460457	-0.0142852	0.246349	0.157173	0.505994	0.454183	0.649252	0.656845	0.284439	0.478829	0.427239	0.605539	0.430907	0.434021	0.60337	0.650736	0.62384	0.539996	0.542501
Dcaf12l2	0.169562	0.291895	0.0947133	0.502908	0.0285743	0.0356485	0.597806	0.635424	0.733055	0.772647	0.637754	0.406012	0.467691	-0.0516699	-0.323804	-0.15312	-0.148529	-0.36792	0.274563	0.250598	0.0354444	0.155534	0.105898	-0.0302259	-0.0458366	-0.21228	-0.38583	-0.403188	-0.621384	-0.0230011	-0.28209	-0.0987847	-0.595233	-0.615738	-0.659509	-0.734672	-0.258866	-0.27898	-0.196037	-0.51357	-0.393261	-0.340982	-0.590512	-0.567586	-0.461627	-0.49367	-0.456958
Dclk1	0.00690954	0.205385	0.0753197	0.526777	0.0274849	0.116499	0.462644	0.437318	0.684412	0.794517	0.775109	0.461203	0.623388	-0.297579	-0.588554	-0.416499	-0.347381	-0.542368	0.0545079	-0.0236444	0.0494146	0.172912	-0.0642859	-0.0962626	-0.0675262	-0.278225	-0.43803	-0.304269	-0.587999	-0.0990665	-0.318027	0.00777064	-0.681245	-0.717417	-0.621063	-0.713696	-0.0281993	0.00968545	0.138875	-0.408378	-0.344527	-0.239436	-0.49585	-0.406564	-0.184633	-0.343838	-0.247526
Dcp1b	-0.228359	-0.289938	-0.0678188	-0.404578	0.0247747	0.0592285	-0.61401	-0.713175	-0.69737	-0.702001	-0.504629	-0.355581	-0.357143	-0.0769222	0.140687	-0.0253552	-0.00148713	0.219694	-0.370306	-0.403708	-0.0529777	-0.17455	-0.254902	-0.0642249	-0.0178842	0.135953	0.276474	0.416745	0.57056	-0.0219983	0.246381	0.158919	0.511555	0.504568	0.650806	0.697056	0.359902	0.452883	0.402087	0.567757	0.411572	0.399874	0.615671	0.642428	0.61363	0.556029	0.557965
Dctn2	0.11974	0.0251039	0.172346	-0.0965939	0.387644	0.283099	-0.327341	-0.547922	-0.565803	-0.712313	-0.610394	-0.494804	-0.629595	0.327941	0.400442	0.173671	0.0590139	0.276649	-0.0349101	-0.174973	-0.265365	-0.475399	-0.464047	-0.364641	-0.326241	0.0529795	-0.0204163	0.201494	0.356392	0.0703884	0.325959	0.0752513	0.674214	0.567259	0.723003	0.696249	-0.00153494	0.308528	0.200189	0.658595	0.48455	0.455466	0.597624	0.614956	0.4692	0.462391	0.406129
Dctn5	-0.2209	-0.108585	-0.223238	0.030239	-0.455773	-0.309585	0.230957	0.460547	0.511351	0.696877	0.63913	0.520045	0.697537	-0.449793	-0.49154	-0.258049	-0.105195	-0.311223	-0.078144	0.0716484	0.306405	0.530106	0.466254	0.408049	0.380287	-0.0446694	0.0758603	-0.130909	-0.292796	-0.101808	-0.339848	-0.0360282	-0.704556	-0.581621	-0.710306	-0.671384	0.121055	-0.217175	-0.091411	-0.640293	-0.477433	-0.4362	-0.559102	-0.562267	-0.375013	-0.401738	-0.324006
Dctpp1	0.22248	0.223879	-0.0222337	0.232361	-0.183799	-0.233971	0.596804	0.806886	0.66346	0.663346	0.40402	0.353179	0.317552	0.130378	0.00203772	0.188414	0.164949	-0.0709948	0.420493	0.55198	0.132072	0.285735	0.502406	0.25856	0.174765	-0.0317365	-0.086125	-0.402772	-0.489458	0.0531509	-0.239435	-0.218772	-0.485089	-0.419014	-0.698939	-0.694638	-0.409032	-0.650802	-0.620375	-0.690676	-0.477496	-0.509012	-0.678724	-0.763968	-0.795239	-0.640272	-0.673394
Dcxr	-0.0404535	-0.149018	0.00270836	-0.320731	0.106668	0.0601719	-0.430024	-0.514285	-0.592739	-0.669822	-0.573557	-0.395142	-0.484542	0.161435	0.342076	0.172497	0.126194	0.317781	-0.142954	-0.167495	-0.105959	-0.24155	-0.188262	-0.0908018	-0.0747505	0.145603	0.219955	0.283035	0.464278	0.0441039	0.268614	0.0681917	0.56365	0.543246	0.601697	0.638157	0.121225	0.224408	0.13741	0.490292	0.372789	0.32769	0.516134	0.500982	0.381042	0.411653	0.366064
Ddo	-0.0903764	-0.114834	0.0560951	-0.149785	0.198575	0.199398	-0.406636	-0.576964	-0.503109	-0.540122	-0.373333	-0.316909	-0.331543	0.0120547	0.0996596	-0.0589757	-0.0752753	0.107918	-0.237221	-0.344459	-0.139198	-0.275897	-0.391186	-0.233472	-0.178117	0.0301788	0.0407304	0.269503	0.355466	-0.0111544	0.21242	0.138022	0.433805	0.370613	0.562521	0.553192	0.22177	0.432114	0.388262	0.542056	0.382067	0.391993	0.519872	0.57077	0.551096	0.46486	0.468723
Ddt	-0.104887	-0.0543003	-0.212739	-0.0062753	-0.457354	-0.372922	0.311723	0.588175	0.522567	0.65389	0.513672	0.464885	0.564668	-0.263368	-0.280953	-0.0541085	0.0502613	-0.166721	0.0777984	0.269872	0.295446	0.512801	0.592344	0.460281	0.399497	0.0128736	0.129779	-0.191172	-0.295956	-0.0437732	-0.303281	-0.113019	-0.619664	-0.483768	-0.71712	-0.662105	-0.0433598	-0.425683	-0.337559	-0.702731	-0.50116	-0.501649	-0.610501	-0.664674	-0.568424	-0.497942	-0.466378
Ddx10	0.213335	0.120408	0.218487	0.0111014	0.435803	0.302186	-0.182236	-0.401625	-0.433483	-0.602736	-0.551125	-0.460481	-0.618591	0.409202	0.426991	0.217943	0.0767427	0.257492	0.0820568	-0.0655786	-0.288003	-0.49148	-0.445837	-0.39457	-0.366669	0.0223008	-0.104821	0.0997225	0.233133	0.0905249	0.299651	0.0331647	0.619729	0.500239	0.627801	0.583967	-0.121048	0.202754	0.0922154	0.576364	0.427182	0.395131	0.492591	0.501361	0.33828	0.353585	0.286024
Ddx39b	-0.00245288	0.096482	-0.0705877	0.242683	-0.228837	-0.166379	0.429078	0.58269	0.620969	0.721921	0.602908	0.451262	0.551358	-0.207371	-0.350846	-0.148305	-0.0795143	-0.29575	0.134835	0.215643	0.176064	0.349602	0.335135	0.217872	0.185895	-0.106776	-0.125875	-0.277929	-0.449834	-0.0475434	-0.302661	-0.0887934	-0.629668	-0.570242	-0.690492	-0.700531	-0.107182	-0.309349	-0.214683	-0.60103	-0.446207	-0.412103	-0.590989	-0.597087	-0.474869	-0.475131	-0.430341
Ddx41	0.177094	0.227061	0.0313855	0.316738	-0.0690283	-0.0913422	0.524568	0.635965	0.608513	0.622671	0.445909	0.327558	0.334296	0.0450292	-0.127288	0.0280144	0.0171191	-0.181908	0.311735	0.361724	0.0730143	0.192153	0.27397	0.103964	0.0585326	-0.10221	-0.20095	-0.354206	-0.48326	0.0165997	-0.225044	-0.143054	-0.465564	-0.444503	-0.592384	-0.621928	-0.300367	-0.418108	-0.370988	-0.528933	-0.38108	-0.374707	-0.556121	-0.586573	-0.559581	-0.499855	-0.501106
Ddx46	-0.0787304	-0.233288	-0.115562	-0.493813	-0.107298	-0.149947	-0.42911	-0.376945	-0.574061	-0.632233	-0.600491	-0.337911	-0.441257	0.155155	0.422336	0.299379	0.273418	0.428409	-0.110605	-0.0202641	0.00985941	-0.0679617	0.109652	0.151039	0.127613	0.244917	0.421964	0.287966	0.517458	0.0613231	0.236764	0.00777703	0.509495	0.562716	0.47612	0.568107	0.0951893	0.0107501	-0.081192	0.298565	0.254895	0.172359	0.394513	0.321975	0.16633	0.288143	0.221851
Dennd1a	-0.162065	-0.153824	0.0810665	-0.137212	0.27497	0.306304	-0.534815	-0.786231	-0.619968	-0.640714	-0.386799	-0.366335	-0.34307	-0.0777364	0.00336351	-0.193269	-0.191923	0.0418339	-0.371373	-0.540509	-0.181465	-0.353296	-0.5843	-0.347024	-0.257153	-0.00737171	-0.0084881	0.356978	0.425462	-0.0452599	0.244754	0.215576	0.493053	0.398462	0.706375	0.678459	0.355868	0.662387	0.628696	0.719504	0.494339	0.533039	0.676257	0.772467	0.799602	0.632121	0.663111
Dennd2d	0.188469	0.194646	0.0230541	0.214998	-0.0639039	-0.110282	0.437992	0.551992	0.469445	0.455191	0.277948	0.22572	0.192929	0.123271	0.00798429	0.125314	0.0948032	-0.0637409	0.313576	0.377575	0.0560638	0.146566	0.283698	0.116141	0.0637859	-0.0453021	-0.117099	-0.298215	-0.366691	0.0412907	-0.155344	-0.148759	-0.316362	-0.290472	-0.460359	-0.472383	-0.308669	-0.428709	-0.411123	-0.441994	-0.307256	-0.32425	-0.453923	-0.504382	-0.529205	-0.432657	-0.456753
Dennd6a	-0.288058	-0.379047	-0.146283	-0.552281	-0.0975671	-0.0516169	-0.694725	-0.729769	-0.772111	-0.761781	-0.57151	-0.360733	-0.364307	-0.105205	0.187635	0.0292918	0.0719574	0.299461	-0.409108	-0.382655	0.00940092	-0.0925518	-0.121489	0.0655252	0.0970485	0.206017	0.424144	0.475229	0.671369	-0.0193213	0.254663	0.149106	0.535041	0.569321	0.656835	0.739955	0.401834	0.399693	0.342901	0.529445	0.394407	0.362744	0.623396	0.623923	0.578129	0.55906	0.552866
Depdc5	0.102402	-0.0110259	0.111895	-0.170623	0.273634	0.172944	-0.307266	-0.454273	-0.529567	-0.663135	-0.598746	-0.447998	-0.586137	0.31808	0.426703	0.231333	0.128985	0.319287	-0.0114606	-0.0916476	-0.201522	-0.375991	-0.303115	-0.236953	-0.219532	0.0973052	0.072967	0.191082	0.362638	0.0773818	0.297737	0.0410978	0.621493	0.553075	0.631819	0.631818	-0.020812	0.188705	0.0816338	0.538479	0.40753	0.361231	0.512163	0.500722	0.341841	0.38052	0.315593
Derl3	0.0593428	0.161347	-0.036568	0.319228	-0.190318	-0.146601	0.523688	0.673333	0.707138	0.79296	0.643624	0.472363	0.558185	-0.155232	-0.337591	-0.124869	-0.0737923	-0.312979	0.209396	0.281212	0.157554	0.333582	0.336537	0.190039	0.152691	-0.130547	-0.188195	-0.344438	-0.532432	-0.0353176	-0.319178	-0.113892	-0.664326	-0.615598	-0.748884	-0.772045	-0.183554	-0.370324	-0.276659	-0.648357	-0.479885	-0.446208	-0.655627	-0.665111	-0.552429	-0.541846	-0.503459
Dhrs7	0.0129821	0.121936	-0.0349118	0.289037	-0.163891	-0.105529	0.426861	0.540652	0.608832	0.701131	0.599273	0.427395	0.527568	-0.196344	-0.362527	-0.176139	-0.115841	-0.319334	0.129569	0.177504	0.13988	0.294357	0.249054	0.146778	0.125469	-0.132405	-0.181362	-0.278394	-0.460311	-0.049896	-0.288574	-0.0729807	-0.603569	-0.565815	-0.646229	-0.671754	-0.104383	-0.251146	-0.1575	-0.540539	-0.407597	-0.364495	-0.55065	-0.541813	-0.413913	-0.437206	-0.388582
Dhrs9	0.0362014	0.0816956	-0.134113	0.137516	-0.358715	-0.323457	0.489639	0.750146	0.663544	0.751243	0.54846	0.473751	0.530051	-0.123081	-0.211852	0.021844	0.0797792	-0.17172	0.239397	0.409621	0.242459	0.452295	0.580859	0.389076	0.316613	-0.0260942	0.00940106	-0.318193	-0.440892	-0.00988629	-0.314321	-0.16615	-0.642606	-0.532875	-0.793363	-0.764516	-0.211439	-0.549684	-0.473262	-0.765824	-0.543192	-0.550141	-0.710533	-0.775328	-0.714992	-0.614027	-0.602805
Diablo	-0.116571	-0.0710067	-0.229346	-0.0334566	-0.48466	-0.397407	0.300585	0.591888	0.51458	0.649887	0.5066	0.46879	0.56904	-0.270801	-0.274749	-0.0440687	0.0647131	-0.15349	0.0720304	0.27725	0.310003	0.533271	0.623518	0.48913	0.424879	0.0259993	0.158342	-0.182732	-0.280733	-0.0435758	-0.304927	-0.116272	-0.621796	-0.476848	-0.72378	-0.661381	-0.0366741	-0.440649	-0.352788	-0.717514	-0.509782	-0.514055	-0.615838	-0.67555	-0.581651	-0.503062	-0.472787
Dip2c	-0.0587187	-0.0840384	0.125919	-0.110159	0.339243	0.321143	-0.468668	-0.724899	-0.612901	-0.681598	-0.47321	-0.424739	-0.457651	0.0696969	0.141776	-0.0733631	-0.116123	0.119047	-0.257798	-0.429087	-0.225217	-0.419002	-0.576104	-0.380207	-0.304189	0.00613851	-0.0301261	0.306142	0.403357	-0.00525735	0.281541	0.173278	0.572737	0.465683	0.735803	0.703103	0.233823	0.563057	0.50189	0.726432	0.509646	0.527436	0.669986	0.743956	0.711404	0.591914	0.593321
Dixdc1	0.244999	0.425454	0.255704	0.751273	0.309119	0.302947	0.6407	0.508902	0.750493	0.760023	0.690414	0.345931	0.418355	-0.0203079	-0.416936	-0.298643	-0.327106	-0.512316	0.269178	0.0998911	-0.115265	-0.0648493	-0.259436	-0.340169	-0.30973	-0.345499	-0.663085	-0.440165	-0.725333	-0.0386374	-0.250917	-0.0361147	-0.545407	-0.661299	-0.532808	-0.682308	-0.262039	-0.0445864	0.0441103	-0.300297	-0.264326	-0.166146	-0.471403	-0.379453	-0.23378	-0.373029	-0.313728
Dlk1	0.231814	0.276884	0.0293136	0.360852	-0.102814	-0.140693	0.648977	0.804348	0.739385	0.748318	0.51385	0.391068	0.383822	0.0878232	-0.108391	0.0823119	0.0621252	-0.183751	0.408158	0.486532	0.096601	0.244631	0.380737	0.156758	0.0923008	-0.104239	-0.21512	-0.438759	-0.580085	0.0321704	-0.268254	-0.192353	-0.552227	-0.517842	-0.728612	-0.756451	-0.395394	-0.562493	-0.51282	-0.667926	-0.475546	-0.478775	-0.692537	-0.743755	-0.730875	-0.63284	-0.644603
Dll1	-0.269025	-0.294568	-0.0639444	-0.35382	0.032378	0.094737	-0.614114	-0.735238	-0.65871	-0.637215	-0.40958	-0.307903	-0.270719	-0.163114	0.0252342	-0.128696	-0.0833969	0.130357	-0.424189	-0.480691	-0.0487539	-0.161663	-0.312034	-0.0952166	-0.0341167	0.0950818	0.224291	0.419266	0.533286	-0.0497107	0.213848	0.188811	0.439139	0.423349	0.617194	0.650391	0.418359	0.534357	0.505478	0.569364	0.40135	0.412332	0.606023	0.658322	0.677397	0.572259	0.597518
Dmrta1	0.26355	0.281926	0.0693182	0.330388	-0.011849	-0.0773926	0.568574	0.67373	0.597859	0.569208	0.356441	0.266995	0.223549	0.174607	-0.000143969	0.134765	0.0851897	-0.107305	0.404093	0.451746	0.0331056	0.1299	0.27609	0.0736438	0.0168529	-0.0864993	-0.212798	-0.389352	-0.488863	0.0517958	-0.186335	-0.177105	-0.382207	-0.372175	-0.550692	-0.583182	-0.40051	-0.496376	-0.475015	-0.509563	-0.357794	-0.370483	-0.54711	-0.59694	-0.624002	-0.522569	-0.550226
Dmrta2	0.013315	-0.15923	0.00263223	-0.429172	0.119602	0.0270139	-0.488709	-0.559173	-0.729395	-0.854871	-0.785607	-0.519217	-0.675187	0.305998	0.549134	0.337207	0.253315	0.48319	-0.0874706	-0.0875134	-0.131377	-0.300257	-0.145701	-0.0695902	-0.0705887	0.219228	0.315403	0.317946	0.57834	0.0886959	0.352832	0.0377065	0.745711	0.731859	0.736983	0.794567	0.0560143	0.148676	0.0189139	0.563229	0.443283	0.361455	0.605572	0.554578	0.351879	0.450191	0.366178
Dna2	0.172263	0.108875	-0.10737	0.00277379	-0.30204	-0.360237	0.446748	0.723189	0.476986	0.468841	0.201779	0.266022	0.196384	0.165526	0.158328	0.321869	0.301294	0.104173	0.383632	0.586365	0.180802	0.331055	0.644027	0.398266	0.293989	0.0842395	0.129106	-0.299466	-0.294971	0.0758439	-0.17503	-0.233401	-0.341446	-0.230178	-0.586833	-0.531529	-0.374259	-0.71314	-0.712556	-0.659312	-0.435407	-0.505792	-0.589023	-0.716731	-0.806912	-0.583526	-0.643275
Dnajb11	0.309858	0.317721	0.0715425	0.351865	-0.0269053	-0.109515	0.646966	0.780218	0.669767	0.630444	0.376064	0.292682	0.231083	0.223778	0.0381187	0.190469	0.128801	-0.0899272	0.477351	0.54439	0.0424695	0.153057	0.346552	0.105574	0.0345401	-0.0811568	-0.216146	-0.443466	-0.542413	0.0680121	-0.204058	-0.213482	-0.416298	-0.398439	-0.623179	-0.653388	-0.474295	-0.599965	-0.582391	-0.59024	-0.410216	-0.433306	-0.625972	-0.693206	-0.739996	-0.605791	-0.645225
Dnajb7	-0.173114	-0.108082	0.102898	-6.14e-06	0.291213	0.351153	-0.43512	-0.704431	-0.459824	-0.448567	-0.186153	-0.252627	-0.180624	-0.17118	-0.16596	-0.323026	-0.300173	-0.109686	-0.379227	-0.577264	-0.173538	-0.317856	-0.628456	-0.387107	-0.284565	-0.0849364	-0.128087	0.292051	0.283992	-0.0767281	0.166188	0.22966	0.323317	0.215259	0.565472	0.511112	0.370733	0.700063	0.70191	0.638903	0.420797	0.491271	0.570415	0.696689	0.789353	0.567983	0.628471
Dnajc15	0.0561968	0.0708672	-0.111002	0.0820678	-0.296303	-0.285372	0.401193	0.627142	0.518582	0.573445	0.388631	0.356863	0.37828	-0.0454433	-0.100382	0.0827652	0.116241	-0.0846136	0.230338	0.383301	0.194595	0.360281	0.509119	0.335867	0.267482	0.00371447	0.0388761	-0.262354	-0.337888	0.00948916	-0.236262	-0.15461	-0.479356	-0.384654	-0.626949	-0.595577	-0.210441	-0.500168	-0.451569	-0.626233	-0.437097	-0.456917	-0.574516	-0.643334	-0.62422	-0.512041	-0.51758
Dnajc28	-0.0619827	-0.068769	0.101062	-0.0690972	0.271571	0.267647	-0.37229	-0.583561	-0.472291	-0.517017	-0.340395	-0.319331	-0.331026	0.0230929	0.0696919	-0.0964993	-0.122376	0.0615123	-0.224812	-0.369115	-0.176912	-0.327394	-0.477949	-0.312763	-0.246996	-0.0100762	-0.0427629	0.244123	0.306616	-0.0144845	0.211344	0.148608	0.42764	0.339566	0.571434	0.540767	0.207502	0.476978	0.436577	0.576941	0.400577	0.423065	0.528134	0.596248	0.58818	0.475798	0.485571
Dnajc3	0.175864	0.233987	-0.00364569	0.331956	-0.153751	-0.166168	0.614949	0.784361	0.736809	0.771707	0.555	0.425326	0.445413	0.0123524	-0.171689	0.0322638	0.0362365	-0.213304	0.352941	0.442216	0.12869	0.292712	0.401867	0.19426	0.133496	-0.102483	-0.186605	-0.412171	-0.563827	0.0133124	-0.289454	-0.175912	-0.596898	-0.549887	-0.753761	-0.774377	-0.335345	-0.529963	-0.466804	-0.687382	-0.493066	-0.488893	-0.699247	-0.744062	-0.703953	-0.622529	-0.62104
Dnmt1	0.0973061	0.073706	-0.1366	0.0232644	-0.352025	-0.366915	0.438496	0.720084	0.530687	0.566999	0.329278	0.348979	0.333238	0.033777	0.0107382	0.203572	0.221236	0.00546814	0.307341	0.508199	0.219791	0.398	0.641019	0.420776	0.327819	0.0536078	0.113082	-0.2886	-0.327608	0.0390685	-0.229509	-0.203958	-0.458385	-0.339148	-0.664441	-0.612016	-0.289448	-0.646743	-0.615501	-0.704459	-0.479081	-0.526504	-0.630136	-0.735829	-0.765109	-0.587297	-0.61811
Dnph1	0.199008	0.184321	-0.0279929	0.16586	-0.171624	-0.223469	0.502107	0.695744	0.545612	0.537513	0.304321	0.283996	0.239348	0.139829	0.0480476	0.203644	0.177663	-0.0206178	0.374985	0.501472	0.117347	0.247396	0.462816	0.244674	0.16631	-0.00554759	-0.0404102	-0.339361	-0.39493	0.0556932	-0.191993	-0.198671	-0.385972	-0.32234	-0.584402	-0.572437	-0.366546	-0.590637	-0.57315	-0.594374	-0.405916	-0.442979	-0.575634	-0.660242	-0.70592	-0.552598	-0.59012
Dpf3	0.148467	0.297876	0.122134	0.554011	0.0844337	0.106392	0.572781	0.562585	0.720458	0.768854	0.672906	0.402674	0.487619	-0.0977867	-0.396859	-0.237713	-0.225934	-0.431532	0.224107	0.15952	0.00791961	0.11383	-0.00479937	-0.106389	-0.103112	-0.251546	-0.449719	-0.386259	-0.63029	-0.0422979	-0.281376	-0.0625601	-0.599115	-0.641973	-0.620736	-0.713993	-0.20797	-0.167787	-0.074397	-0.44421	-0.353883	-0.281451	-0.541722	-0.490867	-0.352846	-0.433471	-0.379709
Dpm2	0.287084	0.320896	0.0602819	0.393401	-0.0572684	-0.119211	0.690624	0.835364	0.753467	0.738598	0.484121	0.365643	0.333116	0.158757	-0.0518866	0.129581	0.0867918	-0.159566	0.465468	0.53491	0.0684347	0.204013	0.366965	0.124413	0.0555761	-0.107627	-0.24504	-0.470222	-0.604329	0.0500352	-0.25294	-0.210481	-0.519769	-0.496557	-0.716857	-0.751856	-0.456962	-0.60114	-0.563098	-0.660376	-0.466812	-0.47687	-0.697202	-0.755065	-0.767025	-0.652236	-0.676372
Dpp4	-0.064178	-0.118057	0.0737722	-0.195864	0.243949	0.22049	-0.46488	-0.655695	-0.610423	-0.67726	-0.505513	-0.409537	-0.458029	0.0885305	0.20433	0.00745647	-0.0318234	0.188001	-0.228442	-0.34379	-0.175465	-0.345521	-0.430794	-0.266804	-0.211874	0.0587251	0.069243	0.305391	0.432565	0.00917124	0.274288	0.138731	0.564092	0.491338	0.685733	0.680193	0.206155	0.447425	0.379003	0.639332	0.458496	0.454462	0.615952	0.658487	0.598777	0.531033	0.51768
Dpp9	-0.0525612	0.00547488	-0.180507	0.0714391	-0.420359	-0.349824	0.399602	0.66944	0.607472	0.728012	0.563515	0.490433	0.581859	-0.225793	-0.283292	-0.0455169	0.0450753	-0.194122	0.140233	0.320906	0.278647	0.49934	0.586093	0.430232	0.366366	-0.0144808	0.0650658	-0.252647	-0.377453	-0.0359302	-0.322691	-0.132496	-0.660931	-0.536169	-0.775458	-0.734345	-0.106908	-0.471804	-0.381841	-0.746271	-0.533598	-0.53158	-0.671623	-0.725655	-0.632185	-0.557729	-0.529148
Dpy19l4	-0.0176783	-0.0332286	0.147945	-0.0395302	0.358089	0.331614	-0.381581	-0.636112	-0.520165	-0.593126	-0.409089	-0.3857	-0.421136	0.0907707	0.125787	-0.072164	-0.122873	0.0856787	-0.202809	-0.379274	-0.230717	-0.414457	-0.565937	-0.393905	-0.321807	-0.0194401	-0.0855467	0.246163	0.320681	-0.00095576	0.25359	0.153981	0.513938	0.400861	0.660714	0.616861	0.179125	0.512971	0.457144	0.666436	0.465118	0.486137	0.596822	0.670409	0.640556	0.524579	0.525393
Dqx1	-0.038128	-0.0794515	0.118563	-0.130784	0.321539	0.291296	-0.451277	-0.686868	-0.607877	-0.68591	-0.499657	-0.430527	-0.480161	0.106737	0.190286	-0.0221083	-0.072992	0.156614	-0.223214	-0.376647	-0.217934	-0.40809	-0.526196	-0.350009	-0.2839	0.0254896	-0.00343259	0.293696	0.406002	0.00782402	0.285853	0.152644	0.584459	0.485986	0.723083	0.698029	0.19807	0.50308	0.434051	0.697338	0.494586	0.500991	0.648702	0.707737	0.654081	0.561594	0.552055
Drd3	0.34809	0.375121	0.124586	0.447665	0.0575675	-0.032664	0.694148	0.78207	0.711454	0.661605	0.414602	0.291079	0.230593	0.242749	0.00847382	0.153187	0.0787709	-0.141248	0.499357	0.524905	-0.00120228	0.0941736	0.251648	0.015617	-0.0446849	-0.127254	-0.313659	-0.478053	-0.603772	0.0660493	-0.206194	-0.204758	-0.425027	-0.435603	-0.618251	-0.673118	-0.498627	-0.557724	-0.536857	-0.556158	-0.392736	-0.402393	-0.622844	-0.671829	-0.707624	-0.600411	-0.634376
Dsg2	0.0689146	0.0814792	0.243068	0.134961	0.503265	0.455495	-0.271216	-0.595691	-0.424546	-0.521724	-0.340575	-0.383403	-0.425685	0.147206	0.0939207	-0.112705	-0.191734	0.00629174	-0.135233	-0.377618	-0.305829	-0.512732	-0.707693	-0.541561	-0.456122	-0.0969929	-0.256942	0.166203	0.195982	0.00293762	0.246195	0.155269	0.492171	0.331592	0.647726	0.561567	0.106895	0.547948	0.495164	0.700219	0.479551	0.519446	0.57678	0.675294	0.65505	0.505245	0.510219
Dtl	0.0817045	0.0677444	-0.134817	0.0320213	-0.345484	-0.351871	0.425346	0.696178	0.526322	0.569531	0.345691	0.353744	0.349104	0.00804148	-0.0201389	0.171708	0.195532	-0.0169382	0.283718	0.475294	0.217748	0.394749	0.614135	0.406319	0.319211	0.0432311	0.100667	-0.279087	-0.326863	0.0305038	-0.232811	-0.191076	-0.466824	-0.351542	-0.657716	-0.608976	-0.264876	-0.610324	-0.573921	-0.688416	-0.471032	-0.511656	-0.617502	-0.71441	-0.730213	-0.568633	-0.59248
Dtymk	0.0433483	0.0182473	-0.195249	-0.0442252	-0.452348	-0.445809	0.416432	0.747741	0.539756	0.602381	0.359653	0.395583	0.398215	-0.0285517	-0.0198251	0.198004	0.24066	0.00995459	0.274601	0.516144	0.278104	0.486212	0.742187	0.518188	0.416988	0.0811303	0.189314	-0.269265	-0.30474	0.0286777	-0.257597	-0.208575	-0.513946	-0.36418	-0.72497	-0.651834	-0.25096	-0.682923	-0.641651	-0.777813	-0.529239	-0.580832	-0.674306	-0.790791	-0.807522	-0.617652	-0.643409
Dut	0.149346	0.16773	-0.0613467	0.194894	-0.241293	-0.258835	0.544272	0.766403	0.6489	0.68099	0.449157	0.389301	0.388665	0.0338881	-0.0783622	0.120792	0.12764	-0.108414	0.343931	0.485166	0.168301	0.338554	0.516063	0.297591	0.220397	-0.0304763	-0.0520003	-0.362869	-0.461744	0.0284203	-0.261493	-0.193666	-0.532082	-0.4524	-0.71689	-0.704446	-0.32671	-0.596104	-0.549241	-0.700667	-0.489711	-0.510888	-0.674005	-0.748972	-0.745132	-0.614875	-0.630561
Dxo	0.252749	0.266935	0.0984796	0.312091	0.0638743	-0.00568128	0.471946	0.520699	0.470772	0.42728	0.259038	0.177583	0.127489	0.189689	0.0276146	0.116828	0.0577485	-0.0852259	0.350411	0.359764	-0.0165076	0.0387109	0.149563	-0.0111372	-0.0512735	-0.0876895	-0.224198	-0.326399	-0.40694	0.0504165	-0.127228	-0.139927	-0.262216	-0.276207	-0.395383	-0.436048	-0.35197	-0.374994	-0.366243	-0.354601	-0.249459	-0.257601	-0.405627	-0.438803	-0.471902	-0.39729	-0.424238
Dync2h1	-0.095906	-0.168937	0.0320846	-0.283409	0.18144	0.162273	-0.518342	-0.676667	-0.665651	-0.727067	-0.557435	-0.423155	-0.475843	0.0795469	0.240445	0.0431876	0.0122363	0.24032	-0.251288	-0.334911	-0.145058	-0.308247	-0.363239	-0.199413	-0.152306	0.100492	0.15432	0.343366	0.498431	0.0123403	0.286086	0.13449	0.592189	0.541054	0.704576	0.719824	0.230019	0.422778	0.348505	0.631045	0.458821	0.442533	0.633014	0.66064	0.587808	0.542411	0.523061
Dynll1	-0.136337	-0.0915171	-0.239974	-0.0572978	-0.496571	-0.40324	0.270534	0.562811	0.487368	0.627577	0.49415	0.462235	0.567219	-0.287757	-0.279608	-0.0521669	0.0623142	-0.148585	0.0480531	0.255867	0.315747	0.538187	0.622405	0.4975	0.435077	0.0332245	0.17762	-0.161603	-0.254745	-0.0476118	-0.299791	-0.108079	-0.611055	-0.46285	-0.705223	-0.638792	-0.0121086	-0.420615	-0.332326	-0.702217	-0.498975	-0.502956	-0.595191	-0.65363	-0.55643	-0.48163	-0.449185
Dynlrb1	-0.115024	-0.04019	-0.198777	0.0472561	-0.43664	-0.339384	0.33178	0.589013	0.563726	0.707006	0.581098	0.496244	0.617046	-0.304409	-0.351248	-0.116593	-0.00372313	-0.228758	0.0597441	0.23163	0.2898	0.51082	0.546941	0.426603	0.375099	-0.0206883	0.0773457	-0.203989	-0.338162	-0.0586443	-0.325396	-0.0979735	-0.669057	-0.543503	-0.745354	-0.703113	-0.0231441	-0.381284	-0.279872	-0.704767	-0.5102	-0.495617	-0.625649	-0.662906	-0.538279	-0.497737	-0.4526
Dzip1	-0.240482	-0.28839	-0.0745232	-0.382922	0.0070956	0.0525874	-0.589795	-0.681785	-0.651496	-0.64291	-0.446283	-0.315673	-0.301766	-0.111654	0.0928506	-0.0570765	-0.0230054	0.182846	-0.375944	-0.407264	-0.0382537	-0.145908	-0.241683	-0.0524764	-0.00528166	0.122248	0.261949	0.401885	0.536987	-0.031476	0.219675	0.159912	0.455125	0.451492	0.598958	0.642943	0.368512	0.450237	0.410432	0.528191	0.379949	0.374997	0.575911	0.607271	0.59692	0.529602	0.539587
E2f7	0.254418	0.237165	-0.00133651	0.220338	-0.142094	-0.212894	0.578603	0.772397	0.610033	0.586183	0.324171	0.294688	0.233169	0.193741	0.0747568	0.237051	0.193876	-0.0220391	0.442709	0.56539	0.102115	0.233146	0.47255	0.227054	0.142226	-0.0189131	-0.0831178	-0.393456	-0.456463	0.0694098	-0.200983	-0.223207	-0.404233	-0.347851	-0.627343	-0.624054	-0.436342	-0.651632	-0.637963	-0.633361	-0.432057	-0.472664	-0.626889	-0.717879	-0.777904	-0.609076	-0.655015
E2f8	0.196792	0.165254	-0.0666666	0.115331	-0.246435	-0.300471	0.522393	0.767905	0.57138	0.567679	0.303358	0.311096	0.258401	0.147556	0.0808729	0.256814	0.235197	0.0178138	0.402728	0.571664	0.158415	0.311481	0.578129	0.332327	0.237658	0.0275791	0.0243235	-0.351436	-0.392058	0.0646841	-0.208138	-0.22711	-0.414971	-0.325118	-0.645737	-0.615121	-0.392177	-0.685586	-0.670019	-0.678702	-0.458841	-0.5103	-0.636522	-0.743861	-0.804941	-0.61441	-0.661088
Ebpl	-0.150727	-0.215741	-0.0166821	-0.326083	0.0974114	0.103269	-0.533519	-0.65418	-0.644105	-0.676528	-0.504872	-0.369355	-0.396728	0.00537587	0.184864	0.0129786	0.00855809	0.220695	-0.290388	-0.344751	-0.0938417	-0.228591	-0.289368	-0.123429	-0.0799923	0.113073	0.204888	0.358001	0.505297	-0.00327492	0.252525	0.136988	0.52366	0.496485	0.640572	0.670012	0.275228	0.409297	0.349335	0.565304	0.410923	0.396761	0.589144	0.61371	0.56364	0.517122	0.507861
Ece2	0.0798918	0.140766	-0.0248586	0.236423	-0.146918	-0.13122	0.428225	0.557178	0.549562	0.599959	0.460632	0.348653	0.392263	-0.0653761	-0.199433	-0.0371558	-0.0119337	-0.199833	0.207311	0.274853	0.118204	0.252189	0.296084	0.161445	0.123038	-0.0842963	-0.130175	-0.283754	-0.412424	-0.010355	-0.235811	-0.110352	-0.488273	-0.447034	-0.580236	-0.593573	-0.189841	-0.346527	-0.285161	-0.518662	-0.377377	-0.363463	-0.52124	-0.543334	-0.482802	-0.446436	-0.430228
Ecm1	-0.133408	-0.195939	-0.0864503	-0.310555	-0.0733792	-0.0597292	-0.34593	-0.341678	-0.396027	-0.397946	-0.320299	-0.190232	-0.206837	-0.0232884	0.141648	0.0634173	0.0793748	0.191476	-0.181829	-0.14878	0.0152151	-0.032581	-0.0099416	0.0683817	0.0748997	0.12702	0.250214	0.236364	0.352805	0.00172908	0.134793	0.0576953	0.28592	0.313659	0.325793	0.377455	0.17728	0.148839	0.112468	0.243325	0.187789	0.160308	0.30127	0.28677	0.243729	0.26009	0.246806
Ect2	-0.0433928	-0.0320986	-0.200111	-0.0416188	-0.437494	-0.390271	0.320954	0.608164	0.480337	0.575226	0.401907	0.400416	0.45199	-0.149671	-0.144786	0.0623084	0.135696	-0.069842	0.148618	0.354967	0.274487	0.474324	0.628303	0.467394	0.392344	0.0498152	0.164826	-0.201393	-0.263718	-0.00996315	-0.260359	-0.145636	-0.525925	-0.38887	-0.6657	-0.602278	-0.120837	-0.507995	-0.446807	-0.686388	-0.477527	-0.501958	-0.590153	-0.66975	-0.630064	-0.509957	-0.505727
Eef1b2	0.00144218	0.0677102	-0.071491	0.162683	-0.2102	-0.16539	0.342705	0.486267	0.490394	0.568118	0.45927	0.357798	0.42835	-0.149264	-0.247508	-0.0825345	-0.0293841	-0.205001	0.122248	0.205293	0.153802	0.297656	0.31507	0.209461	0.176214	-0.0650935	-0.0656279	-0.221797	-0.345305	-0.0303806	-0.239071	-0.0841485	-0.494966	-0.436834	-0.559885	-0.558571	-0.100308	-0.289066	-0.218425	-0.503467	-0.368547	-0.350356	-0.484706	-0.501602	-0.417838	-0.397558	-0.36893
Efcab14	0.130524	0.235355	0.0597711	0.412852	-0.0154049	-0.00244115	0.517962	0.572418	0.647035	0.690721	0.567869	0.373257	0.432406	-0.0647757	-0.28996	-0.130366	-0.117741	-0.316544	0.232393	0.229049	0.054255	0.171453	0.137488	0.0143219	-0.00369632	-0.173375	-0.306098	-0.347719	-0.535964	-0.0226004	-0.257657	-0.0908538	-0.54195	-0.547242	-0.60312	-0.66022	-0.216565	-0.265635	-0.189979	-0.481959	-0.365901	-0.32299	-0.537359	-0.523146	-0.427906	-0.448203	-0.415365
Efhc1	0.0380595	-0.0360921	0.0746492	-0.141418	0.199462	0.140458	-0.275076	-0.396182	-0.427741	-0.514327	-0.440133	-0.335222	-0.420508	0.189993	0.277378	0.127245	0.0638976	0.217087	-0.0604545	-0.12837	-0.146772	-0.279115	-0.258359	-0.184915	-0.163268	0.0678949	0.0596928	0.175107	0.297817	0.0436381	0.223427	0.053964	0.464603	0.412323	0.497885	0.497727	0.0380915	0.203443	0.13003	0.435768	0.324261	0.297926	0.417655	0.420619	0.32116	0.327292	0.289181
Efs	0.147947	0.175077	-0.0248918	0.220555	-0.163674	-0.181977	0.495185	0.662509	0.583908	0.6069	0.411424	0.337033	0.338287	0.0365882	-0.0869795	0.0814535	0.0813147	-0.123566	0.307103	0.406516	0.122508	0.261862	0.394033	0.208691	0.148116	-0.0519449	-0.0980331	-0.331718	-0.432532	0.0226513	-0.228096	-0.161798	-0.466635	-0.413068	-0.617896	-0.620566	-0.293306	-0.490224	-0.447306	-0.587386	-0.414238	-0.424736	-0.581038	-0.635382	-0.624759	-0.527945	-0.53788
Ehd1	0.146191	0.17212	-0.0297482	0.215021	-0.172834	-0.190581	0.496824	0.669911	0.587198	0.611468	0.413217	0.34125	0.342575	0.0350323	-0.0858755	0.0852096	0.0862553	-0.120909	0.308535	0.412591	0.127713	0.270025	0.40656	0.218753	0.156609	-0.0487214	-0.0909426	-0.332549	-0.432369	0.0229736	-0.230673	-0.164302	-0.471552	-0.414944	-0.625588	-0.626209	-0.29436	-0.499214	-0.455998	-0.597107	-0.420572	-0.432262	-0.588054	-0.644502	-0.634519	-0.534442	-0.544872
Eif1ax	-0.145977	-0.0893715	-0.236952	-0.0366644	-0.492268	-0.390974	0.276073	0.561264	0.505028	0.652866	0.527347	0.47907	0.595763	-0.312679	-0.316142	-0.0840761	0.03636	-0.178376	0.0350173	0.235035	0.316262	0.541778	0.604545	0.486291	0.428262	0.0187586	0.15742	-0.16469	-0.2716	-0.055853	-0.311389	-0.0999763	-0.636712	-0.491845	-0.719826	-0.658292	0.00231828	-0.39819	-0.302855	-0.70487	-0.504514	-0.501234	-0.602375	-0.652838	-0.540731	-0.48054	-0.440942
Eif2b4	0.195789	0.192793	-0.0307495	0.1922	-0.184217	-0.228826	0.534584	0.735253	0.59587	0.597475	0.359281	0.321504	0.28828	0.116277	0.0092908	0.180469	0.161295	-0.0533619	0.379612	0.507917	0.128888	0.271793	0.477302	0.25375	0.175072	-0.0192861	-0.0585791	-0.360275	-0.433453	0.0492069	-0.217324	-0.201496	-0.439337	-0.373407	-0.637443	-0.628492	-0.368774	-0.602512	-0.575736	-0.636136	-0.438436	-0.470113	-0.618999	-0.700626	-0.73195	-0.58476	-0.616343
Eif2s2	-0.0849766	-0.238416	-0.123585	-0.498462	-0.12263	-0.161942	-0.425367	-0.364921	-0.563961	-0.617638	-0.588398	-0.325917	-0.425782	0.145092	0.414054	0.297008	0.274931	0.424978	-0.112236	-0.0157608	0.0193684	-0.0523735	0.126893	0.165974	0.141025	0.246793	0.429389	0.286128	0.513679	0.0595163	0.229098	0.00577154	0.49391	0.551676	0.458861	0.553218	0.0978906	0.00148627	-0.0879659	0.280944	0.242378	0.159744	0.380556	0.306527	0.153957	0.277421	0.212283
Eif3b	0.180282	0.152978	-0.0800698	0.107317	-0.270102	-0.315862	0.520739	0.776376	0.582352	0.588143	0.324954	0.330182	0.28651	0.122753	0.0590474	0.243497	0.230329	0.00709809	0.390693	0.567022	0.173419	0.335513	0.597592	0.352783	0.257558	0.0286584	0.0350746	-0.348966	-0.394327	0.0590406	-0.220282	-0.225693	-0.440084	-0.343792	-0.668354	-0.63451	-0.378144	-0.687586	-0.6667	-0.699806	-0.474741	-0.524484	-0.652136	-0.759268	-0.811508	-0.623267	-0.665992
Eif3e	-0.126887	-0.259551	-0.0745589	-0.482466	-0.000801302	-0.0267219	-0.563154	-0.603773	-0.71911	-0.776666	-0.660471	-0.422725	-0.504747	0.107333	0.370645	0.194959	0.173309	0.390273	-0.227236	-0.205942	-0.0531083	-0.180454	-0.104923	0.0139614	0.024535	0.21285	0.368922	0.377366	0.602516	0.0377207	0.292151	0.0818331	0.617083	0.631556	0.662045	0.73349	0.208464	0.239356	0.147266	0.510633	0.394467	0.33549	0.580423	0.550086	0.423413	0.472142	0.424956
Eif3f	0.135179	0.00136885	0.124779	-0.187237	0.297825	0.176644	-0.312788	-0.463535	-0.566434	-0.721625	-0.668565	-0.493684	-0.658056	0.380862	0.500747	0.288675	0.168169	0.370881	0.0199162	-0.059626	-0.221026	-0.410834	-0.304956	-0.248351	-0.235795	0.114512	0.0854866	0.192285	0.387464	0.0949399	0.327952	0.0291313	0.686112	0.613877	0.67934	0.681577	-0.0564744	0.163017	0.0402552	0.568798	0.434872	0.377157	0.541421	0.519577	0.330591	0.390712	0.311715
Eif4b	0.0107459	-0.085446	0.0959171	-0.223778	0.279611	0.212641	-0.450308	-0.636224	-0.655932	-0.766035	-0.629987	-0.48529	-0.588722	0.220971	0.356182	0.134723	0.0582167	0.292059	-0.146053	-0.251559	-0.206328	-0.399341	-0.405422	-0.272672	-0.23218	0.0946409	0.0959009	0.29059	0.463014	0.047404	0.324285	0.103591	0.67253	0.596743	0.748589	0.749149	0.11575	0.362085	0.263117	0.6661	0.490274	0.460856	0.64284	0.659227	0.536389	0.520968	0.477215
Eif4e2	0.00892542	0.0428543	-0.160402	0.0760584	-0.394176	-0.354173	0.439529	0.715058	0.61148	0.703309	0.506625	0.456885	0.51232	-0.134333	-0.191294	0.037591	0.102033	-0.138161	0.212397	0.399167	0.258786	0.46927	0.610113	0.425193	0.350202	0.000771042	0.0654217	-0.283092	-0.386443	-0.00987902	-0.301233	-0.162488	-0.613531	-0.491748	-0.763785	-0.721917	-0.18397	-0.546748	-0.474381	-0.753169	-0.530798	-0.544311	-0.682063	-0.753673	-0.699873	-0.589619	-0.580859
Eif4g1	0.203109	0.168528	-0.0641682	0.114404	-0.242361	-0.299893	0.523947	0.769108	0.56812	0.560878	0.293977	0.304985	0.248016	0.158147	0.0923496	0.266175	0.241471	0.0252692	0.409315	0.578376	0.155319	0.306303	0.578552	0.330477	0.234866	0.0297522	0.0250642	-0.352913	-0.390332	0.0676291	-0.204147	-0.229644	-0.406389	-0.317205	-0.640439	-0.609698	-0.39943	-0.691392	-0.678184	-0.675822	-0.455896	-0.509139	-0.634077	-0.743168	-0.809026	-0.614845	-0.663813
Elof1	0.0843964	0.155088	-0.0698253	0.260614	-0.258826	-0.232245	0.557295	0.765194	0.727694	0.803958	0.607236	0.480391	0.539448	-0.102262	-0.253864	-0.025597	0.017555	-0.239979	0.270604	0.391467	0.191882	0.386338	0.471218	0.282596	0.222496	-0.0848001	-0.113325	-0.367061	-0.525872	-0.0127973	-0.32275	-0.157771	-0.665373	-0.58952	-0.801206	-0.802934	-0.245036	-0.505347	-0.423255	-0.736255	-0.530732	-0.520718	-0.718965	-0.761722	-0.68607	-0.61771	-0.599198
Elovl6	0.313262	0.406674	0.194985	0.590942	0.191697	0.133344	0.668212	0.647131	0.717188	0.686779	0.520814	0.299075	0.292013	0.142247	-0.167583	-0.0425795	-0.102713	-0.301082	0.402203	0.332626	-0.0656645	0.00132046	0.00128631	-0.163719	-0.181905	-0.227188	-0.480671	-0.460801	-0.654817	0.0226811	-0.215675	-0.128125	-0.457367	-0.521281	-0.557936	-0.658423	-0.400206	-0.3196	-0.272277	-0.419603	-0.319329	-0.281165	-0.538197	-0.522845	-0.483015	-0.486806	-0.481349
Elp5	0.119048	0.182671	-0.0170131	0.285244	-0.154274	-0.147927	0.517587	0.666047	0.645175	0.692367	0.518798	0.393581	0.431165	-0.0407183	-0.200805	-0.0157155	0.00291001	-0.21644	0.27004	0.347443	0.126632	0.277634	0.345705	0.178548	0.130608	-0.0964691	-0.159789	-0.344725	-0.488945	-0.00259487	-0.266928	-0.138892	-0.551971	-0.507454	-0.671144	-0.688496	-0.2517	-0.427772	-0.362517	-0.60381	-0.437061	-0.425455	-0.610754	-0.641439	-0.584665	-0.53136	-0.519346
Emc4	0.0632595	0.150494	-0.0523941	0.283338	-0.218253	-0.180669	0.520323	0.691475	0.696029	0.777775	0.614282	0.46573	0.540392	-0.135436	-0.298816	-0.0842787	-0.0357957	-0.276396	0.22438	0.315715	0.170417	0.350721	0.385518	0.226865	0.181347	-0.10764	-0.149144	-0.342071	-0.513576	-0.0265792	-0.313748	-0.127675	-0.650398	-0.590541	-0.752371	-0.765283	-0.198938	-0.413782	-0.326354	-0.669009	-0.489496	-0.466001	-0.66467	-0.687259	-0.590784	-0.557768	-0.52759
Emc7	-0.0130753	0.0634588	-0.105276	0.16965	-0.285675	-0.226829	0.404168	0.594303	0.588925	0.689004	0.554587	0.441407	0.529395	-0.193533	-0.299024	-0.0936621	-0.0231842	-0.23836	0.139805	0.254419	0.203404	0.385261	0.415303	0.285474	0.241834	-0.0662725	-0.0501865	-0.260093	-0.404411	-0.0379282	-0.293891	-0.104614	-0.607261	-0.526876	-0.68953	-0.680263	-0.111909	-0.364531	-0.277987	-0.628468	-0.458094	-0.43921	-0.595612	-0.621212	-0.519908	-0.488291	-0.453905
Eme2	0.0203107	0.0731742	-0.0964534	0.144703	-0.268771	-0.231634	0.398308	0.590136	0.55035	0.628139	0.478944	0.395029	0.454438	-0.126789	-0.216652	-0.0271751	0.0247719	-0.178682	0.174639	0.294727	0.187413	0.355306	0.42575	0.283385	0.232908	-0.0437686	-0.0284052	-0.258601	-0.375694	-0.0184713	-0.262968	-0.119902	-0.540546	-0.461167	-0.644039	-0.630069	-0.151054	-0.400847	-0.331255	-0.604093	-0.433821	-0.428682	-0.569448	-0.608542	-0.540857	-0.482556	-0.464048
Emg1	0.142809	0.123583	-0.107096	0.085626	-0.315016	-0.343303	0.505714	0.778283	0.591245	0.616047	0.359772	0.361583	0.336459	0.0708169	0.0161485	0.214172	0.218407	-0.0120613	0.358704	0.547933	0.201451	0.37887	0.628448	0.39003	0.295078	0.0321074	0.0595299	-0.336094	-0.388847	0.0468885	-0.239939	-0.218984	-0.480853	-0.372555	-0.70044	-0.659881	-0.342365	-0.680215	-0.649385	-0.729498	-0.497771	-0.543738	-0.670666	-0.776101	-0.810388	-0.629127	-0.66348
Eml1	-0.282787	-0.347441	-0.133757	-0.47753	-0.0907471	-0.0344389	-0.627585	-0.666578	-0.676546	-0.652885	-0.467081	-0.299004	-0.282278	-0.140576	0.111232	-0.0239888	0.0264561	0.226925	-0.396905	-0.381612	0.0142939	-0.0714586	-0.130594	0.0503593	0.08538	0.167666	0.361927	0.430763	0.588494	-0.0315013	0.211941	0.148549	0.443539	0.47215	0.571766	0.6417	0.392936	0.397312	0.35739	0.473178	0.347253	0.329427	0.55429	0.566431	0.549148	0.509732	0.515768
Emp2	-0.0244178	-0.0650595	0.150773	-0.11066	0.386202	0.348003	-0.478867	-0.754306	-0.65618	-0.748012	-0.54213	-0.478156	-0.535101	0.130897	0.206221	-0.0315129	-0.0939702	0.158953	-0.233617	-0.417003	-0.257179	-0.473098	-0.612188	-0.418041	-0.342118	0.0131556	-0.0377349	0.309985	0.426141	0.00979525	0.316304	0.169409	0.645449	0.526636	0.800695	0.764504	0.204706	0.564724	0.488431	0.781121	0.552221	0.562872	0.716401	0.786679	0.728477	0.619517	0.609491
Enpp5	0.00260841	0.0128439	0.208562	0.0555612	0.465797	0.438326	-0.373777	-0.696722	-0.518225	-0.599323	-0.383955	-0.407305	-0.433753	0.0906262	0.0776946	-0.140867	-0.201054	0.0225588	-0.216812	-0.451793	-0.288066	-0.498799	-0.715278	-0.516284	-0.424204	-0.0732994	-0.193539	0.238196	0.284362	-0.0107189	0.264659	0.183744	0.530651	0.38018	0.713441	0.64037	0.190322	0.618478	0.566925	0.755339	0.51838	0.559535	0.649239	0.752626	0.743536	0.580053	0.592432
Enpp6	0.0854964	0.0121065	0.102518	-0.0865335	0.234144	0.159662	-0.210675	-0.338306	-0.373393	-0.473478	-0.419943	-0.327657	-0.425609	0.233648	0.293529	0.147229	0.0689899	0.208793	-0.00613478	-0.0829721	-0.164713	-0.298622	-0.264914	-0.211372	-0.193045	0.0511979	0.0133889	0.129373	0.242702	0.0537614	0.216514	0.0367209	0.449935	0.388028	0.46656	0.456285	-0.0181496	0.163602	0.0877154	0.411585	0.307299	0.280201	0.379717	0.380491	0.271689	0.285654	0.241935
Ep400	0.19002	0.311217	0.115855	0.523976	0.0653206	0.0635597	0.603227	0.622965	0.725121	0.753978	0.620608	0.385411	0.438795	-0.0256718	-0.30739	-0.147118	-0.152466	-0.36509	0.287103	0.248921	0.0135752	0.121781	0.0697741	-0.0651547	-0.0781066	-0.220206	-0.410625	-0.408568	-0.625822	-0.0181827	-0.269383	-0.0975594	-0.569674	-0.601103	-0.633033	-0.715104	-0.273748	-0.266867	-0.188703	-0.484123	-0.372578	-0.319707	-0.571156	-0.545143	-0.445814	-0.480681	-0.44674
Epb4.1l1	-0.222047	-0.194987	0.031348	-0.157623	0.184236	0.247567	-0.528521	-0.740008	-0.56221	-0.545569	-0.290239	-0.284229	-0.224962	-0.174269	-0.0873624	-0.247582	-0.213606	-0.00704078	-0.411826	-0.552874	-0.122833	-0.257312	-0.506786	-0.268642	-0.181294	-0.00758393	0.0249719	0.357954	0.403645	-0.0674383	0.192018	0.218856	0.383758	0.313599	0.605228	0.588213	0.404347	0.64851	0.637031	0.627181	0.424685	0.471044	0.60352	0.700935	0.764281	0.58743	0.63438
Epb4.1l3	-0.0939179	-0.158799	0.0122721	-0.262921	0.129437	0.117036	-0.450021	-0.571859	-0.570359	-0.617636	-0.47508	-0.353322	-0.395812	0.0567363	0.204347	0.041011	0.0197594	0.211855	-0.220996	-0.281048	-0.109634	-0.242326	-0.282482	-0.144366	-0.106868	0.0953458	0.154568	0.299189	0.435115	0.00936801	0.239765	0.112548	0.497234	0.461682	0.590277	0.60934	0.203995	0.348905	0.286653	0.522107	0.381025	0.364805	0.531864	0.551444	0.489713	0.456375	0.439861
Epc1	-0.105267	-0.159007	0.065966	-0.239274	0.250509	0.238355	-0.550447	-0.761062	-0.698644	-0.760131	-0.553406	-0.448273	-0.487831	0.0576877	0.196419	-0.0210423	-0.0521095	0.197017	-0.292837	-0.418956	-0.182577	-0.367901	-0.481522	-0.284505	-0.219421	0.067485	0.0942938	0.364006	0.502998	-0.000484015	0.301197	0.168238	0.61875	0.542505	0.769312	0.766816	0.270132	0.530905	0.460566	0.719993	0.514172	0.514048	0.700218	0.752813	0.700514	0.613058	0.605559
Eps15	-0.293891	-0.375282	-0.15314	-0.534562	-0.116463	-0.0630856	-0.666882	-0.691395	-0.726846	-0.706453	-0.521829	-0.324523	-0.317363	-0.128954	0.153134	0.0104343	0.0605565	0.272312	-0.405959	-0.374329	0.023997	-0.0643427	-0.0995899	0.0815995	0.111874	0.196574	0.414504	0.457612	0.639029	-0.025271	0.230463	0.145469	0.484415	0.523216	0.605182	0.687398	0.401165	0.384281	0.336098	0.486214	0.361533	0.333887	0.581111	0.582924	0.549871	0.527295	0.526275
Eps8l1	-0.0361395	-0.109604	0.0570394	-0.219133	0.203006	0.165183	-0.421366	-0.572482	-0.575529	-0.650652	-0.517254	-0.396374	-0.464549	0.131753	0.259856	0.0770301	0.0298083	0.231259	-0.172627	-0.256003	-0.154271	-0.309997	-0.337262	-0.207878	-0.169468	0.0841566	0.107027	0.27568	0.418004	0.0260912	0.266245	0.103949	0.551588	0.495602	0.633978	0.64034	0.150068	0.343041	0.267498	0.566504	0.41436	0.394671	0.556537	0.576079	0.490857	0.463847	0.436384
Ermp1	0.193126	0.303277	0.141274	0.502059	0.129092	0.116966	0.527757	0.504853	0.615435	0.62546	0.52113	0.301666	0.34041	0.00827314	-0.258742	-0.138677	-0.157536	-0.328467	0.25792	0.192187	-0.0298059	0.0419457	-0.0236266	-0.130894	-0.133389	-0.213765	-0.412427	-0.360195	-0.553969	-0.0127238	-0.213947	-0.074288	-0.455836	-0.506043	-0.49931	-0.586144	-0.249942	-0.186276	-0.123397	-0.357618	-0.281741	-0.229952	-0.454462	-0.420193	-0.336685	-0.383182	-0.353998
Erp44	0.0412885	0.118409	-0.0664719	0.232686	-0.230104	-0.190201	0.463589	0.63527	0.631179	0.712674	0.562053	0.434629	0.506693	-0.139506	-0.275988	-0.0742795	-0.0231312	-0.245341	0.194375	0.290976	0.172838	0.345286	0.383495	0.237807	0.19343	-0.0870036	-0.108414	-0.303302	-0.455865	-0.0263906	-0.291714	-0.118079	-0.60368	-0.539355	-0.698945	-0.703464	-0.169671	-0.388969	-0.307438	-0.628954	-0.458639	-0.439557	-0.615198	-0.640046	-0.550462	-0.514971	-0.486887
Esam	0.0555456	-0.0259713	0.0968077	-0.139321	0.244676	0.174196	-0.297632	-0.443324	-0.473786	-0.575864	-0.493015	-0.381205	-0.479943	0.225272	0.31382	0.142114	0.0659941	0.238545	-0.0582145	-0.143044	-0.176239	-0.329542	-0.309539	-0.227806	-0.201979	0.0681824	0.0471009	0.18814	0.322679	0.0508056	0.25334	0.0604624	0.526122	0.460974	0.563837	0.558583	0.0321216	0.232761	0.149264	0.498399	0.369823	0.341727	0.471247	0.477066	0.364113	0.368112	0.324744
Esco2	0.203348	0.214508	-0.00227059	0.240067	-0.133879	-0.177423	0.539494	0.707383	0.600459	0.599798	0.377453	0.314967	0.288138	0.111431	-0.0199305	0.142733	0.120342	-0.0882225	0.37081	0.470722	0.102645	0.233783	0.405301	0.19535	0.126688	-0.0468961	-0.112241	-0.364705	-0.453639	0.0431363	-0.214576	-0.186314	-0.436818	-0.388721	-0.616289	-0.621736	-0.360989	-0.549864	-0.519741	-0.596009	-0.415189	-0.436202	-0.596541	-0.662939	-0.681827	-0.559275	-0.584161
Espn	-0.165527	-0.12198	0.0992598	-0.0477786	0.293558	0.341133	-0.473535	-0.740708	-0.523907	-0.526876	-0.266336	-0.300827	-0.24866	-0.131262	-0.0991881	-0.273948	-0.261139	-0.0521504	-0.375251	-0.565966	-0.1816	-0.33929	-0.62144	-0.380438	-0.281758	-0.0574709	-0.0882381	0.316734	0.33783	-0.0641476	0.199153	0.225481	0.394015	0.288447	0.626391	0.580453	0.363599	0.690988	0.678423	0.677861	0.454463	0.513296	0.616647	0.732649	0.799529	0.597133	0.646132
Esrrg	-0.352521	-0.417278	-0.184737	-0.556873	-0.16523	-0.0841008	-0.699488	-0.712617	-0.724601	-0.676125	-0.471126	-0.285752	-0.247822	-0.211609	0.07899	-0.049373	0.0265458	0.233749	-0.46518	-0.425401	0.0557218	-0.0160212	-0.0849663	0.114808	0.150227	0.193767	0.436399	0.483404	0.650354	-0.0465869	0.206122	0.164552	0.432717	0.482862	0.576543	0.664342	0.465588	0.424327	0.391669	0.466977	0.343036	0.325047	0.573023	0.583795	0.582416	0.538607	0.552992
Etaa1	0.132032	0.0264116	0.156976	-0.113978	0.3531	0.242261	-0.299612	-0.49116	-0.53907	-0.68753	-0.60989	-0.479378	-0.623574	0.346899	0.428144	0.213487	0.0967108	0.300361	-0.00316724	-0.120153	-0.246481	-0.444074	-0.397174	-0.319698	-0.292095	0.0695149	0.00731612	0.183036	0.345829	0.0792364	0.31634	0.0533828	0.656962	0.563004	0.68142	0.663379	-0.0327395	0.240715	0.129736	0.604136	0.450397	0.411916	0.553639	0.55632	0.397388	0.415865	0.351973
Etv5	0.339527	0.405648	0.184164	0.546782	0.170686	0.0935216	0.672649	0.677109	0.697323	0.650684	0.458156	0.273553	0.239302	0.200556	-0.0846793	0.0367256	-0.0365615	-0.234147	0.443573	0.398266	-0.0596485	0.00657414	0.0635303	-0.124585	-0.155964	-0.19324	-0.432529	-0.465061	-0.629727	0.0428211	-0.197758	-0.153866	-0.415999	-0.468515	-0.549	-0.636918	-0.444131	-0.393493	-0.360985	-0.438734	-0.323956	-0.30378	-0.544914	-0.551217	-0.546147	-0.510728	-0.52256
Exo1	0.18671	0.174492	-0.0657429	0.154596	-0.251949	-0.293708	0.553521	0.798266	0.626684	0.636922	0.375219	0.354997	0.321129	0.108351	0.0193276	0.211467	0.200063	-0.0336087	0.395926	0.559383	0.167554	0.333266	0.573835	0.329256	0.238094	0.00408561	-0.00806606	-0.371136	-0.437541	0.0526632	-0.238014	-0.222573	-0.478973	-0.390377	-0.700184	-0.67632	-0.382335	-0.676062	-0.647202	-0.713905	-0.489231	-0.530222	-0.67712	-0.775267	-0.812417	-0.639182	-0.675135
Exoc2	-0.217517	-0.29487	-0.102894	-0.438288	-0.0503677	-0.021291	-0.565377	-0.607641	-0.641696	-0.643299	-0.487502	-0.315087	-0.326728	-0.0607457	0.173064	0.034079	0.0598816	0.252381	-0.322616	-0.31139	-0.0103751	-0.104142	-0.126326	0.0267376	0.054031	0.164532	0.330215	0.385259	0.548886	-0.0105284	0.220882	0.121809	0.463338	0.482965	0.562051	0.62523	0.314508	0.33367	0.282092	0.45824	0.340907	0.314291	0.52761	0.529294	0.483929	0.468349	0.459843
Exoc7	0.138469	0.0723706	0.22829	0.00335394	0.483707	0.380687	-0.305939	-0.587549	-0.543176	-0.693797	-0.565179	-0.50013	-0.62242	0.319678	0.341038	0.101252	-0.0199207	0.205035	-0.0448504	-0.238823	-0.314621	-0.544791	-0.597421	-0.475519	-0.41874	-0.00283243	-0.12898	0.184877	0.306346	0.0590275	0.326238	0.101419	0.668658	0.527601	0.750665	0.695334	0.00668332	0.401069	0.300257	0.724446	0.521026	0.51274	0.628604	0.674751	0.55366	0.500482	0.457149
Exosc8	0.133258	0.0889262	-0.127476	0.0085791	-0.338029	-0.373786	0.447166	0.733288	0.511076	0.526957	0.2707	0.314497	0.272266	0.0972953	0.0841675	0.266343	0.266408	0.0562302	0.348248	0.555522	0.20679	0.375155	0.658048	0.421541	0.320991	0.0718225	0.127923	-0.296757	-0.313849	0.0576716	-0.206699	-0.222062	-0.408641	-0.289802	-0.637901	-0.581903	-0.334074	-0.691835	-0.675145	-0.695895	-0.466654	-0.526722	-0.62066	-0.739749	-0.79967	-0.595373	-0.641035
Ext1	-0.109505	-0.0529777	-0.222319	0.00296409	-0.480593	-0.390496	0.336983	0.627596	0.562472	0.702331	0.553978	0.497251	0.604759	-0.281446	-0.305203	-0.0634276	0.0473521	-0.184581	0.0837864	0.284633	0.311633	0.542526	0.622655	0.482699	0.419095	0.00871979	0.128703	-0.207109	-0.322259	-0.0475366	-0.324711	-0.119204	-0.663973	-0.521616	-0.76592	-0.709673	-0.0471225	-0.448852	-0.353981	-0.747168	-0.533716	-0.532529	-0.651709	-0.707343	-0.602521	-0.530753	-0.49604
F8	0.0173648	0.00520828	0.176544	0.00930909	0.399945	0.36226	-0.341316	-0.612066	-0.489483	-0.573778	-0.397762	-0.38838	-0.432008	0.122254	0.13297	-0.0675281	-0.130389	0.0735763	-0.169658	-0.361739	-0.253194	-0.443788	-0.59616	-0.432311	-0.359128	-0.0377127	-0.131715	0.216935	0.282598	0.00487763	0.253634	0.147723	0.512889	0.387108	0.65446	0.5995	0.14398	0.505079	0.447276	0.669532	0.466171	0.489357	0.585065	0.661715	0.627456	0.509624	0.507946
Faah	0.363041	0.426443	0.236189	0.570892	0.277004	0.184687	0.620031	0.559504	0.606196	0.534463	0.373977	0.186709	0.137009	0.247022	-0.046723	0.0298976	-0.0640725	-0.21998	0.426808	0.333701	-0.125382	-0.103828	-0.0763389	-0.234887	-0.250819	-0.208466	-0.481393	-0.433582	-0.586658	0.048228	-0.141836	-0.126963	-0.303153	-0.388546	-0.41049	-0.515115	-0.4341	-0.293624	-0.275594	-0.294065	-0.223209	-0.198133	-0.42525	-0.414913	-0.421839	-0.410135	-0.424775
Fabp6	-0.19488	-0.311336	-0.0951659	-0.514218	-0.0186968	-0.0164904	-0.64178	-0.695908	-0.773885	-0.807872	-0.649472	-0.421274	-0.473041	0.0249517	0.302873	0.121964	0.123809	0.358242	-0.315369	-0.302867	-0.041551	-0.169865	-0.146973	0.0109099	0.0346469	0.208972	0.386781	0.433481	0.651399	0.0140472	0.292563	0.119329	0.615422	0.631102	0.701368	0.774985	0.29988	0.337811	0.25682	0.560153	0.42359	0.377193	0.635692	0.622689	0.527591	0.541062	0.510881
Fam126a	-0.111591	-0.262632	-0.111658	-0.518484	-0.0813649	-0.114779	-0.507334	-0.48552	-0.657389	-0.713136	-0.644168	-0.379914	-0.474798	0.129825	0.410563	0.264101	0.243168	0.428555	-0.171052	-0.100761	-0.00764718	-0.105075	0.0367711	0.112917	0.102095	0.244632	0.427184	0.340964	0.577743	0.0516066	0.265183	0.0396322	0.566392	0.609725	0.565141	0.655021	0.154541	0.104975	0.0111761	0.390231	0.317103	0.24107	0.483165	0.424551	0.277788	0.374251	0.314648
Fam126b	-0.0476422	-0.180139	-0.00311913	-0.390451	0.114537	0.0583574	-0.507898	-0.599227	-0.701202	-0.792638	-0.683844	-0.466274	-0.574618	0.194861	0.414238	0.215709	0.160949	0.385749	-0.164375	-0.186217	-0.119391	-0.277018	-0.203991	-0.093133	-0.0769845	0.179256	0.272983	0.334448	0.553106	0.0544323	0.317341	0.0758653	0.666768	0.646934	0.705992	0.752611	0.138796	0.249775	0.145612	0.569141	0.43478	0.37839	0.603878	0.58168	0.435662	0.479016	0.422878
Fam129b	0.157761	-0.0192949	0.0636866	-0.282627	0.175855	0.0362771	-0.266157	-0.321912	-0.528823	-0.690224	-0.706121	-0.466735	-0.663332	0.43849	0.607408	0.425142	0.300067	0.471232	0.0996569	0.0992983	-0.15738	-0.312504	-0.0887638	-0.0934189	-0.115061	0.183993	0.206982	0.162055	0.397181	0.123625	0.313161	-0.0344879	0.66497	0.638553	0.584414	0.621452	-0.134966	-0.0382522	-0.173911	0.421906	0.347045	0.255509	0.435905	0.364776	0.128041	0.272069	0.166829
Fam132a	0.0685097	-0.0585349	0.0579142	-0.247763	0.18054	0.0894169	-0.325285	-0.419613	-0.532676	-0.651546	-0.602709	-0.421419	-0.556382	0.29192	0.438625	0.262086	0.174784	0.353534	-0.0212485	-0.0566981	-0.150281	-0.300442	-0.191469	-0.138286	-0.133528	0.135817	0.158857	0.206394	0.394421	0.077657	0.282934	0.0261401	0.594924	0.557075	0.586956	0.609988	-0.00739521	0.126618	0.0211642	0.470142	0.364644	0.306789	0.473867	0.4438	0.279776	0.345911	0.277478
Fam192a	0.175471	0.233787	0.0497761	0.338844	-0.0320987	-0.0525442	0.509323	0.594104	0.590558	0.602993	0.443704	0.312076	0.323429	0.0390433	-0.144183	-5.06e-05	-0.0124893	-0.200391	0.293996	0.322527	0.0525507	0.159536	0.214356	0.0599956	0.0232018	-0.117959	-0.231137	-0.344643	-0.480383	0.0115174	-0.215595	-0.127237	-0.448244	-0.440222	-0.557352	-0.595848	-0.283669	-0.3663	-0.318289	-0.482749	-0.351816	-0.338101	-0.521184	-0.539833	-0.504704	-0.464522	-0.460861
Fam208a	-0.114673	-0.15585	0.0810215	-0.214867	0.281508	0.275807	-0.56571	-0.801897	-0.70984	-0.768248	-0.541364	-0.454251	-0.483475	0.0377278	0.163781	-0.0613688	-0.0898773	0.167978	-0.318117	-0.465547	-0.198501	-0.392672	-0.540321	-0.325348	-0.250586	0.0485352	0.0625376	0.374158	0.50173	-0.00941655	0.304401	0.186818	0.622728	0.534497	0.794818	0.783144	0.295312	0.588609	0.52249	0.76006	0.537888	0.547476	0.729585	0.796146	0.758433	0.646887	0.647332
Fam3b	0.172463	0.250292	0.0635115	0.3876	-0.012801	-0.0245698	0.533241	0.602641	0.630652	0.651405	0.500867	0.338991	0.365897	0.0106315	-0.19901	-0.0476944	-0.054786	-0.251112	0.285887	0.297798	0.0467435	0.156985	0.178868	0.0313031	0.00138362	-0.146523	-0.277767	-0.360422	-0.520861	0.000706477	-0.234694	-0.117455	-0.490679	-0.49165	-0.585035	-0.634706	-0.273973	-0.336413	-0.277891	-0.488738	-0.362097	-0.336467	-0.538936	-0.544489	-0.487584	-0.470197	-0.456283
Fam69b	-0.0499751	-0.216967	-0.0793192	-0.491217	-0.0331649	-0.0948227	-0.466782	-0.45488	-0.650659	-0.734456	-0.68854	-0.414106	-0.539825	0.213623	0.483181	0.32456	0.277504	0.464556	-0.106908	-0.0441663	-0.038568	-0.150972	0.0258724	0.0808578	0.0642226	0.245861	0.402025	0.309781	0.559159	0.0732756	0.28636	0.0183736	0.611541	0.643716	0.585283	0.669065	0.0853273	0.058691	-0.0500214	0.40191	0.330164	0.244545	0.483171	0.415144	0.236954	0.355581	0.280484
Fam76a	-0.0908102	-0.151197	0.0322482	-0.245594	0.169878	0.155959	-0.468254	-0.617222	-0.596895	-0.649555	-0.491029	-0.377629	-0.420056	0.0612386	0.200888	0.023121	-0.00263947	0.203322	-0.23448	-0.315603	-0.133229	-0.280915	-0.342258	-0.18969	-0.144366	0.0833342	0.128128	0.310362	0.444328	0.00728113	0.255108	0.12664	0.527157	0.478135	0.635202	0.646039	0.21569	0.397098	0.33286	0.574736	0.415951	0.404951	0.57346	0.602954	0.543983	0.494893	0.480814
Fam76b	0.0525656	-0.081046	0.0309356	-0.284668	0.133255	0.046793	-0.331125	-0.398239	-0.530517	-0.641917	-0.602014	-0.406052	-0.539398	0.279082	0.443909	0.277798	0.197989	0.369704	-0.0242236	-0.0368347	-0.124044	-0.261241	-0.133554	-0.0879668	-0.0898703	0.154595	0.20088	0.211918	0.407465	0.0779141	0.274117	0.017713	0.578727	0.556399	0.560748	0.595198	-0.00252638	0.0927451	-0.0116165	0.432488	0.340718	0.277073	0.451174	0.411529	0.245055	0.325404	0.255185
Farp1	-0.146155	-0.17705	0.0322128	-0.227429	0.181918	0.196717	-0.516451	-0.695613	-0.615651	-0.644527	-0.441363	-0.36173	-0.367882	-0.0252317	0.102909	-0.0771979	-0.0813498	0.135507	-0.314279	-0.421211	-0.135053	-0.284974	-0.419774	-0.227063	-0.163767	0.0544032	0.0981952	0.345287	0.453441	-0.0205759	0.244452	0.167861	0.500316	0.441491	0.656524	0.65801	0.298861	0.511683	0.464015	0.623386	0.440284	0.450084	0.614365	0.670624	0.654626	0.555333	0.563488
Farsa	-0.0560053	-0.0407696	-0.224842	-0.0477677	-0.489046	-0.432904	0.350354	0.66851	0.531443	0.640227	0.451956	0.447914	0.509444	-0.177232	-0.171337	0.0593703	0.144037	-0.083643	0.1557	0.384139	0.307144	0.530053	0.694545	0.519676	0.437724	0.0538767	0.183742	-0.219128	-0.290518	-0.0141901	-0.291165	-0.15787	-0.588595	-0.436004	-0.739327	-0.668845	-0.124286	-0.554411	-0.484487	-0.760326	-0.529821	-0.555161	-0.652881	-0.739172	-0.690482	-0.561409	-0.554371
Fbl	0.0368527	-0.0201298	-0.223364	-0.136487	-0.490005	-0.493983	0.360381	0.716844	0.459162	0.511137	0.260097	0.348167	0.328422	0.00758184	0.0658352	0.270083	0.307352	0.0945625	0.273774	0.543455	0.290582	0.49283	0.798313	0.568928	0.457751	0.131285	0.27544	-0.231545	-0.224378	0.0437848	-0.223687	-0.219528	-0.439024	-0.272985	-0.669231	-0.575809	-0.252371	-0.719217	-0.694681	-0.758897	-0.506131	-0.57674	-0.633419	-0.770225	-0.820176	-0.59583	-0.636866
Fbln2	-0.217724	-0.273751	-0.0683304	-0.379307	0.01338	0.0481778	-0.570153	-0.657708	-0.64307	-0.644006	-0.461001	-0.322966	-0.321456	-0.0798192	0.123697	-0.027106	-0.00194849	0.200982	-0.347367	-0.375	-0.0432038	-0.152495	-0.227671	-0.050861	-0.00835121	0.127216	0.26161	0.387476	0.528913	-0.0221952	0.224206	0.147461	0.465637	0.46188	0.595137	0.639545	0.33844	0.417877	0.372523	0.518122	0.375542	0.364997	0.564948	0.589418	0.56544	0.511899	0.514883
Fbxo32	-0.348291	-0.344953	-0.114342	-0.368537	-0.0555285	0.048827	-0.62394	-0.714699	-0.606606	-0.539308	-0.295316	-0.219502	-0.133756	-0.28975	-0.0993041	-0.217162	-0.131598	0.0582898	-0.491853	-0.528507	0.0100262	-0.0658139	-0.259396	-0.0282768	0.0362679	0.0852557	0.248277	0.431989	0.514351	-0.0814693	0.156925	0.205908	0.319583	0.325276	0.521976	0.563111	0.495276	0.558591	0.557726	0.492175	0.338987	0.364658	0.546105	0.608552	0.678629	0.547253	0.596092
Fbxo36	0.0838728	0.242346	0.107143	0.508153	0.0823282	0.127036	0.470096	0.437004	0.628061	0.692362	0.644366	0.374806	0.482102	-0.162839	-0.438755	-0.297726	-0.26803	-0.442965	0.131397	0.0531339	0.00746193	0.10118	-0.0667341	-0.123546	-0.105635	-0.248386	-0.424675	-0.314808	-0.554628	-0.061783	-0.261368	-0.0210543	-0.559898	-0.605497	-0.538495	-0.629065	-0.113927	-0.0538363	0.0440003	-0.358007	-0.297179	-0.214948	-0.450735	-0.382936	-0.222727	-0.336977	-0.269902
Fbxo8	-0.252192	-0.266992	-0.0393024	-0.305556	0.0708771	0.13087	-0.588981	-0.731074	-0.633756	-0.615789	-0.384604	-0.30424	-0.264739	-0.158057	0.00556163	-0.150254	-0.109882	0.101591	-0.414461	-0.490645	-0.068033	-0.186694	-0.356163	-0.13705	-0.0706805	0.0714511	0.175967	0.40116	0.500252	-0.0517563	0.209862	0.193187	0.42869	0.399641	0.613892	0.635021	0.407854	0.554536	0.528481	0.581426	0.406288	0.424487	0.603235	0.664833	0.691297	0.57206	0.600873
Fcgbp	-0.0345304	0.0804422	-0.033742	0.255191	-0.137231	-0.0643473	0.325362	0.402753	0.504675	0.603043	0.549795	0.379027	0.493014	-0.236853	-0.384861	-0.22627	-0.156878	-0.322868	0.0476423	0.071679	0.121664	0.253504	0.160208	0.103284	0.0981911	-0.132737	-0.171849	-0.209218	-0.383373	-0.0642729	-0.255626	-0.0312284	-0.537886	-0.51109	-0.538073	-0.565469	-0.0232591	-0.129493	-0.0365488	-0.428288	-0.331955	-0.279801	-0.440771	-0.413719	-0.271454	-0.328471	-0.269902
Fcgr4	0.0258006	0.0726984	-0.132731	0.130472	-0.350377	-0.31207	0.46546	0.716257	0.638044	0.726657	0.535677	0.46104	0.520251	-0.131522	-0.216421	0.0100392	0.0696566	-0.172456	0.220287	0.384004	0.236933	0.4407	0.55755	0.376768	0.308356	-0.0266001	0.0103868	-0.301801	-0.422594	-0.0131101	-0.305732	-0.156014	-0.625473	-0.518954	-0.765933	-0.737901	-0.192642	-0.519708	-0.443696	-0.737241	-0.523891	-0.52862	-0.68305	-0.743286	-0.679816	-0.587142	-0.573659
Fech	0.0282283	-0.031073	0.138853	-0.105321	0.340933	0.282099	-0.381359	-0.605011	-0.564396	-0.667053	-0.520791	-0.438977	-0.520083	0.19093	0.26336	0.0531278	-0.0217575	0.194003	-0.138754	-0.283853	-0.23114	-0.422717	-0.487811	-0.348421	-0.29505	0.0320022	-0.016961	0.243373	0.366098	0.0319929	0.290222	0.116804	0.596131	0.496163	0.694924	0.668423	0.109987	0.409738	0.328196	0.657068	0.472408	0.465559	0.603278	0.644885	0.55789	0.500826	0.47367
Fen1	0.127535	0.118181	-0.109917	0.0947339	-0.31931	-0.338345	0.503136	0.772584	0.601365	0.635164	0.387395	0.377273	0.36417	0.0425444	-0.0178631	0.184855	0.196741	-0.0363625	0.340839	0.526167	0.206294	0.387841	0.618517	0.387521	0.296251	0.0226965	0.0503519	-0.333378	-0.396753	0.0384253	-0.250399	-0.210627	-0.503755	-0.395965	-0.71255	-0.674223	-0.322869	-0.658922	-0.621407	-0.732734	-0.503108	-0.54302	-0.675082	-0.774018	-0.794156	-0.625523	-0.653021
Fgf11	-0.0239171	0.0829842	-0.0678424	0.241159	-0.215445	-0.144063	0.394563	0.53056	0.590904	0.697423	0.60029	0.440879	0.551499	-0.233542	-0.376393	-0.182243	-0.107562	-0.311579	0.0986942	0.166297	0.168739	0.33497	0.292161	0.194947	0.171217	-0.114316	-0.133262	-0.254133	-0.429902	-0.056708	-0.295704	-0.0693589	-0.617037	-0.563722	-0.656722	-0.670128	-0.0707454	-0.25297	-0.155289	-0.559762	-0.420208	-0.379173	-0.553218	-0.548555	-0.413973	-0.433966	-0.382101
Fggy	-0.107737	-0.177465	0.0516968	-0.284744	0.23077	0.213175	-0.576278	-0.773394	-0.736484	-0.803277	-0.601734	-0.470623	-0.521518	0.0762311	0.23935	0.0158345	-0.0179915	0.239186	-0.291667	-0.403107	-0.175726	-0.363352	-0.451283	-0.257918	-0.198174	0.092557	0.137265	0.381391	0.54144	0.00728518	0.317239	0.16189	0.654372	0.586589	0.794477	0.802201	0.267891	0.510128	0.431526	0.726702	0.523842	0.514052	0.718034	0.760092	0.691025	0.621479	0.606195
Fgl1	0.0670067	-0.0655638	0.0609714	-0.263138	0.192281	0.0982068	-0.351553	-0.454346	-0.569337	-0.693392	-0.637123	-0.44697	-0.587075	0.301988	0.45762	0.269583	0.178941	0.370285	-0.0307265	-0.0704693	-0.159586	-0.319442	-0.210209	-0.149725	-0.143031	0.142302	0.167374	0.223546	0.421482	0.0799471	0.300131	0.0317593	0.630702	0.589811	0.626776	0.650683	0.000598847	0.145485	0.0348272	0.504756	0.390289	0.330582	0.508352	0.478746	0.308242	0.374046	0.303321
Fibp	-0.10317	0.0223525	-0.0735968	0.205776	-0.194552	-0.0933377	0.266123	0.357394	0.475931	0.601991	0.573701	0.40299	0.545565	-0.319772	-0.444901	-0.277623	-0.181344	-0.343584	-0.0241597	0.0124844	0.155976	0.301314	0.178976	0.14546	0.145228	-0.123714	-0.127098	-0.165202	-0.343488	-0.0847154	-0.269387	-0.00903927	-0.566904	-0.525513	-0.542608	-0.559481	0.0533919	-0.0822616	0.0229335	-0.431285	-0.337316	-0.27853	-0.427039	-0.393364	-0.224095	-0.299021	-0.226773
Firre	-0.231332	-0.236422	-0.00498672	-0.254524	0.129722	0.184344	-0.576064	-0.751714	-0.62899	-0.619578	-0.378275	-0.318819	-0.280277	-0.143679	-0.00541182	-0.172356	-0.140957	0.07704	-0.408796	-0.513726	-0.100097	-0.233546	-0.427454	-0.199937	-0.125304	0.0457242	0.119704	0.390515	0.477762	-0.0526179	0.217699	0.203019	0.442203	0.393659	0.63963	0.645767	0.40005	0.594726	0.568367	0.623122	0.432013	0.458138	0.625564	0.699525	0.730589	0.59291	0.624555
Fkbp4	0.0871113	0.144236	-0.0880407	0.22626	-0.292331	-0.270601	0.559272	0.792046	0.725177	0.799297	0.586572	0.480903	0.530487	-0.0865271	-0.220257	0.0131595	0.0551923	-0.207051	0.286818	0.429358	0.208544	0.410342	0.527402	0.324846	0.255893	-0.0625613	-0.0739957	-0.36804	-0.512503	-0.00487099	-0.322034	-0.172976	-0.661168	-0.57261	-0.815492	-0.806567	-0.261148	-0.554169	-0.476847	-0.766902	-0.547623	-0.547497	-0.737128	-0.793415	-0.732147	-0.640916	-0.629953
Flot1	-0.0834274	-0.19705	-0.0409913	-0.384025	0.0363379	0.00445369	-0.465088	-0.516223	-0.610713	-0.670885	-0.573588	-0.376314	-0.455014	0.119959	0.331559	0.173626	0.144477	0.332992	-0.174742	-0.170368	-0.0667948	-0.185677	-0.121846	-0.0224506	-0.0115707	0.171635	0.285417	0.309766	0.500645	0.0376542	0.258501	0.0682965	0.544872	0.546256	0.581647	0.63491	0.156472	0.208696	0.125908	0.456568	0.351114	0.301419	0.505134	0.481781	0.367054	0.407024	0.363737
Flot2	-0.230279	-0.375054	-0.225785	-0.640461	-0.27492	-0.258559	-0.556548	-0.444622	-0.636097	-0.633407	-0.564013	-0.279486	-0.327967	-0.0160916	0.320866	0.22485	0.258783	0.415184	-0.253325	-0.110218	0.106828	0.0689224	0.216206	0.294031	0.271594	0.288596	0.564567	0.383546	0.617921	0.0235581	0.203939	0.0403332	0.443293	0.543765	0.44429	0.571515	0.249176	0.0610163	-0.00773883	0.253098	0.220487	0.14237	0.400425	0.327959	0.21844	0.324935	0.281572
Fmo4	-0.241085	-0.280691	-0.0303694	-0.3566	0.102074	0.145194	-0.653417	-0.811954	-0.73736	-0.74149	-0.50091	-0.384566	-0.370604	-0.10374	0.0897699	-0.099488	-0.0751103	0.170656	-0.420049	-0.501546	-0.0950059	-0.241764	-0.389556	-0.160157	-0.0931649	0.0990208	0.209997	0.442267	0.578152	-0.0370643	0.263921	0.198163	0.542494	0.507277	0.726013	0.752459	0.408089	0.577954	0.531751	0.670276	0.475452	0.482225	0.693979	0.749314	0.744343	0.638423	0.65412
Foxm1	0.202583	0.184466	-0.0409443	0.159118	-0.200801	-0.253294	0.526172	0.741548	0.575536	0.570292	0.321085	0.305744	0.259577	0.141417	0.0523828	0.220694	0.196615	-0.015176	0.393335	0.536143	0.13474	0.27722	0.511722	0.278914	0.193628	0.00199293	-0.024861	-0.354944	-0.410408	0.0586383	-0.206028	-0.212647	-0.413564	-0.339994	-0.626596	-0.609188	-0.383625	-0.63597	-0.617007	-0.641829	-0.437608	-0.479006	-0.615774	-0.708833	-0.757781	-0.590487	-0.63066
Foxp3	0.0195995	0.07282	-0.0970071	0.14481	-0.26986	-0.23228	0.398713	0.591017	0.551525	0.629839	0.480636	0.396339	0.456288	-0.128145	-0.218133	-0.028095	0.0242908	-0.17963	0.174204	0.294588	0.188161	0.356593	0.42667	0.284283	0.23379	-0.0439538	-0.0282895	-0.258806	-0.376363	-0.0188018	-0.263825	-0.119867	-0.542335	-0.462681	-0.6457	-0.631658	-0.150504	-0.401039	-0.331092	-0.605508	-0.434911	-0.429611	-0.570682	-0.609708	-0.541441	-0.483351	-0.464588
Fpgt	-0.0743715	0.0124727	-0.095065	0.133635	-0.233274	-0.155721	0.263702	0.394258	0.441945	0.547996	0.484401	0.368395	0.475002	-0.245718	-0.331318	-0.16833	-0.087619	-0.247918	0.0262013	0.10017	0.169476	0.315409	0.272619	0.208645	0.189776	-0.0724687	-0.0499141	-0.164865	-0.300451	-0.0580003	-0.244681	-0.0435652	-0.509553	-0.449424	-0.529313	-0.526227	-6.24e-05	-0.183651	-0.0985742	-0.459079	-0.34434	-0.311057	-0.434245	-0.431409	-0.309474	-0.329384	-0.280626
Frmd3	0.00498765	0.117816	-0.083721	0.284457	-0.272928	-0.203103	0.514882	0.701254	0.73785	0.853973	0.706585	0.532021	0.645293	-0.233093	-0.401176	-0.160998	-0.082635	-0.340239	0.171122	0.270647	0.208853	0.414695	0.40828	0.26362	0.223131	-0.122118	-0.144445	-0.334031	-0.53377	-0.0522623	-0.356818	-0.111116	-0.741652	-0.669793	-0.820668	-0.831134	-0.13886	-0.382959	-0.273274	-0.718771	-0.531893	-0.494556	-0.705677	-0.716815	-0.578345	-0.571325	-0.52152
Fstl4	0.226345	0.324218	0.118629	0.50221	0.0664727	0.0433947	0.617568	0.651012	0.712483	0.72172	0.563843	0.356914	0.382508	0.039294	-0.229063	-0.0753588	-0.0976099	-0.308713	0.333984	0.309543	0.00778121	0.110523	0.107302	-0.0492524	-0.0727209	-0.196897	-0.38582	-0.420281	-0.613689	0.00198651	-0.250271	-0.121038	-0.526844	-0.554186	-0.619359	-0.694863	-0.323943	-0.329653	-0.266148	-0.49199	-0.370681	-0.332831	-0.574303	-0.565619	-0.499372	-0.501278	-0.483715
Ftsj1	0.269396	0.252983	0.010735	0.239623	-0.124119	-0.200002	0.594284	0.781114	0.62088	0.591812	0.326494	0.291982	0.226446	0.208167	0.079682	0.240284	0.191675	-0.0255289	0.456661	0.572827	0.0922517	0.219901	0.459592	0.210754	0.12633	-0.0258933	-0.101579	-0.404947	-0.470849	0.0722106	-0.199895	-0.225852	-0.402403	-0.351392	-0.62787	-0.62907	-0.451237	-0.654846	-0.64244	-0.630533	-0.430375	-0.470368	-0.63018	-0.720104	-0.782706	-0.614229	-0.66153
Fubp3	0.0482407	-0.115567	-0.0209446	-0.373365	0.0390453	-0.0539366	-0.329962	-0.33192	-0.532915	-0.643796	-0.640683	-0.394921	-0.54555	0.301595	0.511883	0.36248	0.285139	0.443023	0.00582972	0.0493673	-0.0754319	-0.190178	0.0114476	0.0250867	0.0018584	0.209028	0.302579	0.212801	0.440497	0.0934178	0.269612	-0.0171562	0.575939	0.587829	0.515786	0.577851	-0.0311867	-0.0233757	-0.136188	0.348931	0.29253	0.206198	0.40097	0.329185	0.133448	0.266919	0.181002
Fuca2	-0.0409323	-0.0826148	0.110845	-0.135607	0.305897	0.277342	-0.444066	-0.669818	-0.595873	-0.670762	-0.48963	-0.419065	-0.467209	0.101595	0.187126	-0.0190985	-0.067368	0.156472	-0.219989	-0.36602	-0.208467	-0.392369	-0.504859	-0.333355	-0.269756	0.0286184	0.00493325	0.289371	0.400886	0.00756362	0.278521	0.148252	0.569809	0.476301	0.704031	0.681706	0.19573	0.487251	0.419865	0.676632	0.480401	0.485636	0.631902	0.688027	0.635157	0.547022	0.537435
Furin	0.200927	0.169974	0.303675	0.168273	0.593361	0.481601	-0.195187	-0.531337	-0.427425	-0.587722	-0.460885	-0.467031	-0.582207	0.338339	0.274526	0.0397319	-0.0969697	0.107578	0.00581892	-0.243084	-0.36694	-0.606074	-0.709426	-0.59254	-0.523309	-0.0798486	-0.286116	0.106703	0.175173	0.0542582	0.299128	0.104415	0.606053	0.427085	0.700356	0.607201	-0.0455455	0.431824	0.342506	0.723948	0.509584	0.523049	0.582167	0.653705	0.556138	0.465447	0.432448
Fus	0.167411	0.058333	0.15233	-0.0866262	0.323938	0.203394	-0.213534	-0.371557	-0.446696	-0.597343	-0.560412	-0.432201	-0.585141	0.373379	0.439543	0.251105	0.129209	0.299165	0.0626042	-0.0322865	-0.226746	-0.402425	-0.316848	-0.277399	-0.263568	0.0695244	0.00144627	0.124775	0.279086	0.0895476	0.28444	0.0185946	0.593013	0.510053	0.58249	0.566754	-0.0972108	0.137582	0.0289777	0.502625	0.38137	0.335964	0.45551	0.443076	0.275007	0.32094	0.249987
Fxyd3	0.0543646	0.198791	0.0250737	0.430899	-0.0769795	-0.0196725	0.516936	0.584149	0.71161	0.801987	0.703992	0.465585	0.579597	-0.199764	-0.439917	-0.24602	-0.193385	-0.415739	0.159818	0.160219	0.100347	0.250445	0.151142	0.0493682	0.0406309	-0.201998	-0.316671	-0.341347	-0.574024	-0.0594031	-0.318182	-0.065237	-0.671006	-0.664631	-0.696649	-0.754724	-0.134804	-0.212562	-0.104957	-0.5441	-0.421249	-0.356275	-0.59271	-0.558791	-0.402145	-0.464477	-0.402824
Fzd6	-0.145227	-0.134818	0.0898537	-0.112996	0.283431	0.310417	-0.504101	-0.755243	-0.589322	-0.613032	-0.368517	-0.355461	-0.334822	-0.066059	0.00250434	-0.189128	-0.191832	0.0332684	-0.349694	-0.520706	-0.18479	-0.354087	-0.58098	-0.352818	-0.264644	-0.0154245	-0.0275655	0.335649	0.397565	-0.0425742	0.236797	0.207936	0.476376	0.379337	0.682798	0.651015	0.334004	0.642947	0.610127	0.700218	0.48033	0.51945	0.652158	0.747578	0.773708	0.608842	0.638703
Gaa	0.129408	0.0727637	0.224857	0.0177766	0.474621	0.379214	-0.293235	-0.572315	-0.516559	-0.658518	-0.528413	-0.476004	-0.587675	0.295836	0.308538	0.0780633	-0.0363327	0.180043	-0.0512672	-0.245487	-0.306455	-0.528676	-0.593778	-0.471027	-0.412896	-0.0125428	-0.139712	0.177248	0.286377	0.0522756	0.310061	0.103798	0.634255	0.494491	0.72109	0.6638	0.0149664	0.404675	0.311051	0.703513	0.503598	0.500274	0.606938	0.65708	0.548733	0.487492	0.449872
Gab2	0.00667047	-0.0793111	0.0805979	-0.203734	0.239984	0.181631	-0.399628	-0.559991	-0.58013	-0.676231	-0.557017	-0.42686	-0.517914	0.192991	0.315427	0.121118	0.0547342	0.260585	-0.130151	-0.220036	-0.178416	-0.347155	-0.349992	-0.233509	-0.198634	0.0865446	0.0913319	0.258185	0.411788	0.0418251	0.285469	0.0905574	0.592335	0.527679	0.658322	0.660571	0.103658	0.315662	0.228363	0.58368	0.430144	0.403317	0.565423	0.578559	0.469729	0.458049	0.419179
Galc	0.164723	0.0244171	0.130536	-0.17244	0.29794	0.165312	-0.270687	-0.410269	-0.531489	-0.695173	-0.664125	-0.485845	-0.66234	0.414085	0.526775	0.321244	0.191778	0.382457	0.0620474	-0.0100394	-0.221069	-0.406492	-0.274983	-0.238768	-0.233365	0.116407	0.0793537	0.162808	0.359329	0.105051	0.322203	0.00979397	0.675508	0.605125	0.648088	0.650262	-0.0994952	0.109935	-0.016322	0.533189	0.412314	0.348825	0.504763	0.473983	0.272229	0.349825	0.263579
Galnt15	-0.151615	-0.158054	0.0443514	-0.168727	0.195558	0.222426	-0.480644	-0.672387	-0.556055	-0.572275	-0.361784	-0.319522	-0.305018	-0.0645281	0.0313787	-0.135257	-0.130898	0.0711363	-0.3219	-0.444715	-0.135853	-0.277253	-0.449703	-0.251828	-0.18162	0.0203327	0.044742	0.321947	0.398209	-0.034377	0.215056	0.17703	0.436162	0.369387	0.607828	0.597022	0.309101	0.538086	0.504867	0.601039	0.417151	0.441204	0.579784	0.650557	0.662619	0.537587	0.558652
Galnt3	0.294583	0.334057	0.0845978	0.418851	-0.0103852	-0.0749829	0.678167	0.792881	0.731968	0.710508	0.471459	0.341683	0.308725	0.166316	-0.0563994	0.110412	0.0617062	-0.171518	0.455777	0.501348	0.0415206	0.161186	0.30145	0.0727033	0.0121553	-0.1231	-0.279285	-0.463208	-0.601295	0.0482881	-0.238101	-0.196692	-0.491156	-0.483492	-0.673224	-0.718346	-0.449277	-0.552384	-0.516231	-0.607002	-0.431741	-0.435827	-0.657285	-0.704276	-0.713242	-0.615412	-0.637042
Gars	0.153916	0.152573	-0.063463	0.148693	-0.234931	-0.263429	0.500678	0.720961	0.58029	0.598914	0.369199	0.3392	0.320584	0.0696108	-0.0166073	0.163211	0.160792	-0.0546197	0.341986	0.487411	0.158086	0.313371	0.513662	0.298467	0.219068	-0.00521844	-0.0153315	-0.334658	-0.405558	0.0393613	-0.227318	-0.194259	-0.459271	-0.378731	-0.649881	-0.630083	-0.32792	-0.59444	-0.561406	-0.653746	-0.451098	-0.482443	-0.621026	-0.704023	-0.723599	-0.578353	-0.604186
Gas2	0.0591023	-0.0466811	0.111595	-0.196091	0.293299	0.207167	-0.390609	-0.56767	-0.611265	-0.737174	-0.630954	-0.482523	-0.605926	0.27676	0.398784	0.182348	0.0897275	0.309638	-0.0832751	-0.18365	-0.214504	-0.405969	-0.377276	-0.272222	-0.240661	0.0946132	0.0787187	0.248187	0.423096	0.0632491	0.321348	0.07732	0.667991	0.590768	0.715804	0.71382	0.0508528	0.29321	0.187521	0.628177	0.467084	0.429803	0.599833	0.604925	0.461779	0.469618	0.414731
Gas6	-0.0988345	-0.145049	0.0691591	-0.212832	0.248651	0.238314	-0.518346	-0.72562	-0.657068	-0.714815	-0.514981	-0.423132	-0.457723	0.0505731	0.174783	-0.0321012	-0.0615121	0.174829	-0.280174	-0.406692	-0.178429	-0.355865	-0.4734	-0.283394	-0.219118	0.0558316	0.0745762	0.342574	0.468749	-0.0027759	0.283897	0.16334	0.582291	0.505809	0.730051	0.723856	0.258647	0.516169	0.451271	0.68913	0.490486	0.493622	0.665907	0.719976	0.675086	0.585181	0.580434
Gata4	-0.0263232	-0.126685	0.0282189	-0.281697	0.150539	0.100893	-0.420871	-0.53072	-0.588562	-0.671234	-0.566452	-0.404813	-0.493801	0.169542	0.330686	0.153093	0.100774	0.297136	-0.140571	-0.18712	-0.129648	-0.276037	-0.242957	-0.138376	-0.115737	0.125434	0.176913	0.275502	0.446913	0.0426458	0.273651	0.0764583	0.57192	0.536801	0.620253	0.64525	0.117381	0.256884	0.170262	0.521647	0.391851	0.353279	0.532834	0.527609	0.41245	0.427966	0.385155
Gatc	0.0778691	0.114342	-0.101239	0.161893	-0.302324	-0.28695	0.500669	0.73787	0.645766	0.711104	0.503667	0.432727	0.467892	-0.0638228	-0.162539	0.0528557	0.0905465	-0.1496	0.271859	0.424538	0.207236	0.396981	0.536636	0.340563	0.269057	-0.0306863	-0.0200609	-0.328876	-0.442447	0.00356088	-0.288477	-0.171044	-0.589239	-0.494918	-0.747147	-0.726694	-0.248507	-0.549236	-0.484708	-0.721885	-0.510027	-0.520697	-0.680396	-0.745715	-0.705667	-0.599079	-0.597079
Gbf1	0.179541	0.255065	0.019192	0.383405	-0.116228	-0.124089	0.631108	0.775056	0.760668	0.798201	0.593899	0.435493	0.466511	-0.00345968	-0.214485	-0.0114101	-0.00683697	-0.257649	0.345439	0.410926	0.111264	0.270565	0.345264	0.147893	0.0958747	-0.132025	-0.239894	-0.423548	-0.59627	0.00487283	-0.29772	-0.163266	-0.617173	-0.584473	-0.757031	-0.79122	-0.327639	-0.48766	-0.417491	-0.669419	-0.486144	-0.47029	-0.696994	-0.727119	-0.669636	-0.612683	-0.602591
Gbp9	-0.0575662	-0.173723	-0.0306375	-0.362298	0.0463117	0.00521366	-0.429272	-0.47763	-0.580808	-0.648406	-0.566167	-0.371013	-0.458422	0.146347	0.347158	0.192995	0.155838	0.335572	-0.141691	-0.136754	-0.0719642	-0.189506	-0.111251	-0.0260203	-0.0190714	0.167715	0.269723	0.284499	0.473325	0.0447814	0.254217	0.0553203	0.536447	0.535852	0.559854	0.610218	0.122494	0.175225	0.090241	0.434953	0.336974	0.284633	0.479168	0.45145	0.328682	0.3782	0.330269
Gcn1l1	0.242102	0.219819	-0.0206786	0.19213	-0.175242	-0.24265	0.571269	0.783737	0.607794	0.589111	0.321778	0.303512	0.24303	0.184515	0.0794931	0.24822	0.210389	-0.0092946	0.438801	0.577427	0.120282	0.259771	0.512086	0.262186	0.172879	-0.00489123	-0.05198	-0.387386	-0.4442	0.0695422	-0.205812	-0.228372	-0.412763	-0.345478	-0.642277	-0.630681	-0.431167	-0.673275	-0.659158	-0.656866	-0.446698	-0.491495	-0.639593	-0.737241	-0.799257	-0.620618	-0.66786
Gemin2	0.032035	0.133834	-0.0367133	0.290255	-0.174274	-0.123974	0.455996	0.584382	0.633413	0.720443	0.599881	0.435006	0.525655	-0.172645	-0.339249	-0.146229	-0.0913977	-0.304888	0.160903	0.219838	0.145413	0.305613	0.284897	0.165497	0.137153	-0.125786	-0.175175	-0.298553	-0.47672	-0.0417385	-0.293695	-0.0896335	-0.612641	-0.569932	-0.673501	-0.69622	-0.136081	-0.299169	-0.208444	-0.574456	-0.428774	-0.391751	-0.581757	-0.582185	-0.465421	-0.471641	-0.429312
Gfer	0.248377	0.234981	-0.00424483	0.22359	-0.147837	-0.214727	0.580972	0.776343	0.618729	0.599163	0.338622	0.30455	0.248046	0.181724	0.0605087	0.226606	0.186991	-0.0319661	0.437571	0.56074	0.106548	0.241077	0.474851	0.230537	0.146366	-0.0220616	-0.0851713	-0.394545	-0.462221	0.0661395	-0.207501	-0.221512	-0.418075	-0.360591	-0.638507	-0.635487	-0.430323	-0.648625	-0.631835	-0.641332	-0.438774	-0.477324	-0.634426	-0.723729	-0.778036	-0.612805	-0.656124
Gfod2	0.094508	0.155004	-0.00942346	0.25263	-0.120218	-0.110659	0.432742	0.54859	0.544891	0.587789	0.449702	0.334567	0.37258	-0.0473759	-0.188904	-0.0338867	-0.0156644	-0.198949	0.216181	0.273198	0.102444	0.228021	0.269523	0.135849	0.0994833	-0.0906114	-0.148977	-0.288027	-0.416587	-0.0071372	-0.227183	-0.109295	-0.471007	-0.437777	-0.562022	-0.580553	-0.20035	-0.337305	-0.27912	-0.497838	-0.362885	-0.348287	-0.507898	-0.527506	-0.471241	-0.437377	-0.422929
Gga2	0.251347	0.247152	0.0625202	0.258821	-0.00416709	-0.0773187	0.484314	0.580611	0.48458	0.443199	0.246583	0.195313	0.135208	0.201956	0.0667875	0.171955	0.115563	-0.0420272	0.375676	0.42476	0.0198709	0.094139	0.255493	0.0697819	0.0143018	-0.0535015	-0.159219	-0.333431	-0.396148	0.0602801	-0.137164	-0.166214	-0.278411	-0.268107	-0.44221	-0.46462	-0.375745	-0.462244	-0.45726	-0.425526	-0.292646	-0.315525	-0.454068	-0.509352	-0.560028	-0.448959	-0.485812
Ggcx	0.13345	0.264417	0.0486259	0.481636	-0.0609111	-0.0334755	0.62535	0.711332	0.800149	0.867157	0.717109	0.481401	0.565078	-0.11341	-0.378396	-0.171127	-0.143153	-0.393785	0.266167	0.277373	0.0916726	0.248773	0.206568	0.0563091	0.0320051	-0.204312	-0.347216	-0.417672	-0.650322	-0.0345307	-0.330538	-0.110702	-0.694095	-0.688354	-0.767794	-0.830089	-0.243927	-0.333833	-0.234942	-0.621706	-0.470638	-0.417851	-0.678157	-0.663109	-0.536886	-0.560766	-0.516341
Ghr	-0.249422	-0.271958	-0.0270881	-0.320996	0.102472	0.15592	-0.62936	-0.792022	-0.693701	-0.686584	-0.44166	-0.350229	-0.32015	-0.136754	0.0367327	-0.140561	-0.108002	0.125676	-0.427738	-0.516599	-0.0901876	-0.228072	-0.400892	-0.168535	-0.0975331	0.0774627	0.179069	0.427008	0.540653	-0.047624	0.240404	0.203896	0.491736	0.45374	0.685387	0.705038	0.41815	0.592392	0.55729	0.647053	0.454042	0.470426	0.664768	0.729232	0.745073	0.622339	0.647522
Gjb3	0.000381623	-0.161707	-0.0141574	-0.417903	0.0817213	0.000264897	-0.456247	-0.505666	-0.672242	-0.782499	-0.722401	-0.468922	-0.610432	0.271106	0.506101	0.316921	0.244958	0.453103	-0.0855476	-0.0725271	-0.105135	-0.25304	-0.101748	-0.0346821	-0.0390164	0.21268	0.315652	0.298022	0.541876	0.0809218	0.319659	0.0311678	0.676935	0.673325	0.664556	0.724341	0.0578216	0.120678	0.00227381	0.498272	0.395139	0.316883	0.546235	0.494321	0.307459	0.404983	0.327228
Gls	-0.162247	-0.210645	0.00164463	-0.293048	0.134255	0.148668	-0.548313	-0.699569	-0.652112	-0.679835	-0.484182	-0.37265	-0.386258	-0.0212356	0.140939	-0.0386814	-0.0393549	0.181638	-0.320456	-0.400767	-0.112233	-0.25646	-0.359835	-0.172634	-0.11741	0.0883139	0.163783	0.367893	0.499288	-0.0148212	0.253719	0.159305	0.522782	0.481115	0.665957	0.683775	0.305414	0.478376	0.424545	0.60975	0.436387	0.434675	0.62023	0.662186	0.631418	0.554828	0.555876
Glt8d1	0.0231621	0.153994	0.0292643	0.364019	-0.0393253	0.0179474	0.391026	0.421123	0.556777	0.637108	0.582881	0.372492	0.479432	-0.194514	-0.397188	-0.247601	-0.198315	-0.367759	0.0912667	0.0717458	0.0699239	0.183834	0.0643625	0.00458509	0.00825298	-0.180603	-0.280347	-0.257349	-0.457024	-0.0602433	-0.255047	-0.0299194	-0.540713	-0.545544	-0.535369	-0.589853	-0.0704593	-0.104395	-0.0114882	-0.397387	-0.315639	-0.252315	-0.444822	-0.402138	-0.256769	-0.33451	-0.274549
Gltpd2	0.0996592	0.238074	0.0872698	0.470516	0.0418553	0.0754299	0.488158	0.489915	0.636613	0.694198	0.617654	0.376558	0.466516	-0.128346	-0.384389	-0.235192	-0.210979	-0.395774	0.168575	0.119983	0.0272955	0.131139	0.014032	-0.068084	-0.0640214	-0.219449	-0.377783	-0.32706	-0.547664	-0.0474627	-0.261434	-0.0476323	-0.556092	-0.585417	-0.566035	-0.64335	-0.151486	-0.135281	-0.0452937	-0.408133	-0.325483	-0.258125	-0.48584	-0.438571	-0.302182	-0.380681	-0.326244
Glud1	-0.238745	-0.266964	-0.0144363	-0.322874	0.128917	0.174882	-0.644953	-0.821767	-0.724625	-0.727446	-0.477622	-0.380098	-0.359137	-0.113627	0.0622781	-0.128707	-0.104233	0.141901	-0.426156	-0.524372	-0.107847	-0.258787	-0.430182	-0.193039	-0.11986	0.0794165	0.174334	0.436176	0.558596	-0.0426329	0.25994	0.207393	0.532101	0.486785	0.727684	0.744918	0.414192	0.608823	0.566918	0.685988	0.482714	0.497314	0.698919	0.764371	0.770682	0.64795	0.669325
Gm10069	0.091507	0.191334	0.00101853	0.351897	-0.122376	-0.0934209	0.522472	0.636962	0.681056	0.747879	0.605768	0.429544	0.501247	-0.111466	-0.308254	-0.117262	-0.0833437	-0.306339	0.224116	0.268642	0.116673	0.268983	0.264159	0.124048	0.0928259	-0.143749	-0.230053	-0.346658	-0.531262	-0.0276784	-0.292365	-0.107921	-0.6103	-0.581949	-0.689556	-0.724895	-0.20262	-0.337627	-0.253013	-0.5841	-0.434841	-0.399652	-0.609294	-0.611919	-0.510544	-0.507521	-0.473511
Gm10560	-0.0150122	-0.0726665	0.0993522	-0.151129	0.275592	0.234246	-0.405285	-0.599672	-0.565112	-0.647815	-0.498881	-0.408755	-0.473869	0.139921	0.233791	0.0388063	-0.017033	0.191442	-0.171397	-0.292336	-0.192887	-0.365636	-0.430307	-0.287925	-0.237851	0.0482427	0.0325581	0.262744	0.386192	0.0220272	0.272116	0.119115	0.559883	0.479164	0.661341	0.647969	0.146734	0.400703	0.327211	0.617222	0.444394	0.436854	0.582378	0.619773	0.545404	0.490742	0.469279
Gm10790	-0.05649	-0.127828	0.00354813	-0.241661	0.0918905	0.0683671	-0.359831	-0.441428	-0.474515	-0.5245	-0.427775	-0.303957	-0.357541	0.0876064	0.223265	0.0883845	0.0615798	0.217523	-0.14901	-0.181425	-0.0854954	-0.193758	-0.186799	-0.0912813	-0.0700165	0.100049	0.156771	0.238223	0.368316	0.0217789	0.206612	0.0730617	0.431354	0.40997	0.484019	0.507742	0.133392	0.231035	0.170268	0.409711	0.305425	0.2799	0.425643	0.426605	0.352335	0.352451	0.32699
Gm12253	0.0452351	0.100453	-0.0878407	0.177795	-0.265645	-0.234705	0.449872	0.648669	0.603975	0.678626	0.51122	0.417816	0.473318	-0.110284	-0.217535	-0.016821	0.0300903	-0.190054	0.210994	0.333269	0.188091	0.363563	0.44524	0.285458	0.230521	-0.0533319	-0.0513947	-0.294037	-0.420866	-0.0139406	-0.279037	-0.134957	-0.573691	-0.494809	-0.691295	-0.681292	-0.187238	-0.442147	-0.370656	-0.646524	-0.463876	-0.459286	-0.616607	-0.659242	-0.593603	-0.527614	-0.51135
Gm13139	0.0334793	0.146102	7.13e-05	0.324252	-0.0990567	-0.049194	0.419488	0.495697	0.584263	0.663409	0.575586	0.392292	0.486098	-0.171495	-0.354037	-0.187436	-0.139112	-0.326593	0.13007	0.14821	0.102026	0.234709	0.169072	0.0792578	0.0667093	-0.150485	-0.226679	-0.275796	-0.459977	-0.0478672	-0.266821	-0.0605695	-0.560789	-0.543619	-0.590297	-0.62898	-0.108234	-0.20183	-0.113281	-0.474684	-0.363285	-0.314916	-0.502969	-0.482996	-0.357519	-0.396769	-0.348111
Gm14719	0.0469945	0.171918	0.0180687	0.37222	-0.0748021	-0.0246696	0.454188	0.518021	0.625332	0.705039	0.616439	0.410351	0.509581	-0.174654	-0.38242	-0.210678	-0.164025	-0.360495	0.142139	0.146575	0.0919395	0.225614	0.143342	0.0517528	0.0425898	-0.17368	-0.27089	-0.29976	-0.502095	-0.0512796	-0.280195	-0.0596793	-0.590419	-0.582275	-0.615786	-0.664811	-0.120011	-0.194814	-0.10071	-0.484384	-0.373865	-0.318298	-0.524633	-0.497045	-0.361191	-0.412353	-0.359159
Gm1943	-0.113108	-0.0645269	-0.226768	-0.0217716	-0.482978	-0.395412	0.313078	0.604364	0.53007	0.666285	0.520689	0.477315	0.579177	-0.272418	-0.282666	-0.0485629	0.0603573	-0.162304	0.07726	0.281272	0.310212	0.535768	0.623916	0.487125	0.422835	0.0208122	0.148955	-0.191169	-0.294226	-0.0443221	-0.310885	-0.117849	-0.634455	-0.49035	-0.737182	-0.676709	-0.041576	-0.444913	-0.35515	-0.727313	-0.517501	-0.520351	-0.62766	-0.686447	-0.589845	-0.512679	-0.481384
Gm1965	0.312035	0.450624	0.275936	0.716053	0.3448	0.297569	0.640921	0.511063	0.691029	0.658796	0.559563	0.264917	0.284559	0.105279	-0.268154	-0.177402	-0.241189	-0.407816	0.339922	0.178886	-0.146576	-0.121183	-0.241957	-0.348212	-0.330452	-0.308324	-0.632062	-0.445055	-0.683475	-0.00245444	-0.197208	-0.0660801	-0.429491	-0.548748	-0.45729	-0.600111	-0.340746	-0.115591	-0.0573727	-0.261065	-0.224078	-0.150408	-0.431258	-0.36361	-0.279113	-0.369731	-0.339522
Gm1976	0.1151	-0.000535826	0.107424	-0.163647	0.257469	0.153229	-0.273742	-0.404718	-0.492996	-0.626855	-0.579622	-0.428099	-0.569763	0.327812	0.43238	0.248334	0.144561	0.320882	0.0146022	-0.0544957	-0.191193	-0.355779	-0.265381	-0.21516	-0.203921	0.099356	0.0750017	0.16853	0.337679	0.0816466	0.284436	0.0263374	0.595012	0.5325	0.590297	0.592387	-0.0462025	0.144127	0.0379779	0.494629	0.377939	0.328209	0.471163	0.452665	0.289659	0.340854	0.272826
Gm5084	0.130718	0.231326	0.0664291	0.403048	0.00260385	0.0123179	0.492686	0.534896	0.610801	0.648629	0.534658	0.346383	0.400629	-0.0540028	-0.273053	-0.12612	-0.117574	-0.303031	0.222814	0.211932	0.0415859	0.147538	0.110598	-0.00403871	-0.0190952	-0.169874	-0.303791	-0.331416	-0.511256	-0.0206585	-0.239777	-0.0838429	-0.505086	-0.51555	-0.560504	-0.618391	-0.208662	-0.241554	-0.170972	-0.442609	-0.337397	-0.295312	-0.500246	-0.484031	-0.394382	-0.417402	-0.386351
Gm5136	-0.130033	0.0357079	-0.0768005	0.280748	-0.214203	-0.0852082	0.326528	0.419699	0.58932	0.746848	0.724732	0.497287	0.680988	-0.407811	-0.576204	-0.373688	-0.25374	-0.45029	-0.0431587	-0.0149155	0.179683	0.353423	0.176797	0.146585	0.153317	-0.170195	-0.187576	-0.202839	-0.434286	-0.11099	-0.333238	0.000998242	-0.703402	-0.662209	-0.658641	-0.68779	0.079204	-0.0626997	0.0710225	-0.508298	-0.403152	-0.322732	-0.512771	-0.460479	-0.239962	-0.350631	-0.25538
Gm5446	0.127565	0.17428	-0.00617704	0.252043	-0.122771	-0.128886	0.46665	0.597143	0.564118	0.594194	0.431102	0.330044	0.34925	-0.000658781	-0.140829	0.0168325	0.0229532	-0.168441	0.262727	0.331579	0.101906	0.229238	0.308132	0.151751	0.10604	-0.0791907	-0.140968	-0.312314	-0.430358	0.00750282	-0.224389	-0.132044	-0.462955	-0.425888	-0.579887	-0.595211	-0.248648	-0.399814	-0.34955	-0.527657	-0.379151	-0.374618	-0.535661	-0.568624	-0.533894	-0.474557	-0.471442
Gm5617	-0.129347	0.0435323	-0.0807798	0.299299	-0.228693	-0.0955733	0.357422	0.460593	0.633395	0.797695	0.767271	0.528656	0.719235	-0.421647	-0.600863	-0.384359	-0.259913	-0.471591	-0.0331141	0.000108868	0.191185	0.376757	0.198722	0.160296	0.164931	-0.178359	-0.197979	-0.222934	-0.466751	-0.114248	-0.354334	-0.00516849	-0.747352	-0.702489	-0.706743	-0.736999	0.0710344	-0.0838803	0.0564439	-0.549737	-0.434018	-0.351049	-0.554034	-0.501931	-0.27284	-0.383843	-0.285446
Gm5737	-0.0478151	0.047617	-0.0896093	0.184041	-0.242692	-0.168035	0.344165	0.49073	0.535957	0.644599	0.554788	0.419299	0.527763	-0.240462	-0.353481	-0.166656	-0.0872948	-0.278095	0.0728162	0.153453	0.180205	0.344307	0.312108	0.222833	0.197471	-0.0894201	-0.0827242	-0.219176	-0.375566	-0.0560769	-0.279686	-0.064638	-0.582125	-0.519289	-0.620241	-0.622207	-0.0448744	-0.245179	-0.152422	-0.53927	-0.402434	-0.367552	-0.519161	-0.520225	-0.393044	-0.405156	-0.356036
Gm6086	-0.102595	-0.112325	0.0888349	-0.120494	0.26996	0.276315	-0.457197	-0.68228	-0.560687	-0.600425	-0.392616	-0.357542	-0.362382	-0.00440973	0.0692558	-0.116137	-0.133948	0.0779782	-0.285463	-0.435359	-0.179898	-0.34376	-0.515191	-0.320284	-0.246454	0.0038401	-0.00847753	0.302395	0.379929	-0.0223638	0.238155	0.174531	0.482729	0.394226	0.651115	0.626008	0.267792	0.548872	0.505535	0.649938	0.451932	0.476051	0.607713	0.682722	0.678846	0.552077	0.565999
Gm7257	0.0084547	0.123148	-0.0320611	0.299434	-0.158756	-0.0967695	0.427252	0.535545	0.614108	0.70953	0.612822	0.432894	0.538506	-0.207668	-0.379578	-0.192361	-0.129614	-0.333543	0.12201	0.164665	0.13824	0.292839	0.235847	0.138011	0.119402	-0.139872	-0.19242	-0.27844	-0.466705	-0.0539107	-0.292468	-0.0679343	-0.612535	-0.577374	-0.648733	-0.677105	-0.0963291	-0.236457	-0.139756	-0.537008	-0.406965	-0.360105	-0.550009	-0.536673	-0.401677	-0.433035	-0.380901
Gnpda2	-0.156366	-0.204998	0.0345265	-0.283341	0.205744	0.213538	-0.59928	-0.797987	-0.727265	-0.769357	-0.544662	-0.435141	-0.455556	-0.000235228	0.159488	-0.0530045	-0.064799	0.188888	-0.34608	-0.460863	-0.156638	-0.33279	-0.463933	-0.249865	-0.181915	0.0782435	0.134228	0.399908	0.539496	-0.0142876	0.294258	0.183906	0.604366	0.540039	0.771594	0.778455	0.326724	0.563467	0.500678	0.720372	0.512849	0.516068	0.714623	0.770528	0.735319	0.637349	0.63866
Golt1b	0.240584	0.270615	0.0465167	0.333526	-0.0582905	-0.10871	0.591716	0.720088	0.649809	0.640258	0.421933	0.320128	0.295046	0.128091	-0.0509608	0.107738	0.0739179	-0.139496	0.39551	0.458274	0.064363	0.183958	0.323118	0.115035	0.0555398	-0.091231	-0.205208	-0.402405	-0.51859	0.0412103	-0.221057	-0.180476	-0.454222	-0.431708	-0.622943	-0.651515	-0.387525	-0.517691	-0.483387	-0.574497	-0.406294	-0.414636	-0.603799	-0.653766	-0.661427	-0.563072	-0.582643
Gpam	0.039533	-0.0602422	0.125863	-0.199208	0.333164	0.25271	-0.44901	-0.661278	-0.676353	-0.803069	-0.663741	-0.520812	-0.637711	0.26106	0.385669	0.146826	0.0553388	0.301683	-0.129867	-0.255644	-0.238918	-0.450863	-0.458805	-0.32318	-0.278833	0.0859865	0.0645704	0.287143	0.463992	0.0551627	0.346596	0.106036	0.717825	0.62635	0.795356	0.786804	0.0958792	0.38175	0.274502	0.715067	0.525203	0.495725	0.678011	0.698288	0.563797	0.54531	0.49672
Gpc1	0.130213	0.181024	-0.0252862	0.262893	-0.17071	-0.172418	0.523084	0.687667	0.641452	0.682433	0.494211	0.386791	0.41236	-0.0157295	-0.163662	0.0224742	0.0360767	-0.185492	0.29088	0.38274	0.133486	0.286863	0.383882	0.203869	0.148697	-0.0794275	-0.134003	-0.348795	-0.479789	0.00667755	-0.261855	-0.152829	-0.539258	-0.487323	-0.675472	-0.685845	-0.273346	-0.469147	-0.410056	-0.62185	-0.445488	-0.442741	-0.621387	-0.663399	-0.622446	-0.549015	-0.545066
Gpr128	-0.175646	-0.16304	0.0547999	-0.143474	0.2202	0.261144	-0.50351	-0.722123	-0.565397	-0.571247	-0.333101	-0.315586	-0.281553	-0.107437	-0.0254204	-0.196879	-0.183443	0.0267215	-0.364068	-0.509828	-0.146723	-0.293976	-0.514127	-0.291585	-0.208985	-0.00325858	0.0113519	0.338101	0.396747	-0.0498827	0.211831	0.202698	0.426044	0.347928	0.627889	0.607412	0.352447	0.613389	0.589093	0.640862	0.438663	0.476505	0.609474	0.698686	0.735622	0.577452	0.611538
Gpr133	-0.254039	-0.250413	-0.039496	-0.260157	0.0585567	0.128527	-0.538014	-0.673053	-0.557244	-0.525894	-0.301563	-0.249555	-0.193335	-0.190965	-0.053069	-0.186656	-0.137293	0.0501307	-0.405972	-0.482453	-0.0543177	-0.155283	-0.341719	-0.130224	-0.0635681	0.0480841	0.142407	0.368028	0.439488	-0.0613325	0.172697	0.189619	0.350096	0.322367	0.53668	0.551635	0.402696	0.540038	0.52777	0.522762	0.359974	0.386981	0.540004	0.607233	0.655401	0.525334	0.563185
Gpr20	0.0457686	0.181383	0.0261758	0.399447	-0.0631564	-0.00846251	0.467188	0.522005	0.64684	0.730838	0.647209	0.424436	0.532012	-0.189651	-0.412119	-0.236788	-0.187445	-0.388255	0.137811	0.132682	0.0881174	0.223199	0.122666	0.0349571	0.0296799	-0.189564	-0.297115	-0.308378	-0.524219	-0.0571194	-0.290245	-0.054169	-0.61284	-0.609952	-0.629977	-0.685323	-0.114876	-0.17777	-0.0780284	-0.486581	-0.378749	-0.316606	-0.533561	-0.498657	-0.350996	-0.41483	-0.356058
Gpr56	0.271792	0.262551	0.374863	0.306895	0.697932	0.569103	-0.09563	-0.479078	-0.336661	-0.514886	-0.396923	-0.455021	-0.575829	0.383345	0.249041	0.012958	-0.145466	0.0445948	0.0675812	-0.227748	-0.419926	-0.672217	-0.803352	-0.697243	-0.620049	-0.139743	-0.418424	0.0354152	0.067252	0.0582865	0.28658	0.0997954	0.575428	0.362324	0.671012	0.545896	-0.110445	0.441475	0.355569	0.730566	0.507281	0.534418	0.548368	0.63671	0.54616	0.43357	0.403109
Gramd1b	0.007383	0.0397866	0.218211	0.118722	0.469303	0.450607	-0.314666	-0.639258	-0.434431	-0.503944	-0.293649	-0.352989	-0.36226	0.060614	0.0129372	-0.184919	-0.238327	-0.0388165	-0.204963	-0.448164	-0.282522	-0.47847	-0.719172	-0.526501	-0.431988	-0.105382	-0.245325	0.199075	0.212523	-0.0208642	0.227147	0.182165	0.450504	0.295987	0.637622	0.553744	0.181389	0.612866	0.575804	0.703645	0.475697	0.528299	0.587184	0.699798	0.714743	0.535027	0.557617
Gria4	-0.314981	-0.351795	-0.1413	-0.440467	-0.108385	-0.0287066	-0.608828	-0.648748	-0.619961	-0.571618	-0.372873	-0.240876	-0.192306	-0.213047	0.0164236	-0.0982077	-0.0278323	0.15549	-0.428402	-0.419382	0.0322215	-0.0360448	-0.13934	0.0521366	0.0941155	0.139234	0.330716	0.420747	0.544837	-0.0527797	0.172952	0.162793	0.35971	0.389022	0.509243	0.572616	0.429377	0.430172	0.41011	0.43624	0.312992	0.310932	0.513882	0.540894	0.561755	0.493196	0.516967
Grik5	-0.216362	-0.21238	0.0304507	-0.211119	0.195069	0.245256	-0.581794	-0.797673	-0.645883	-0.64568	-0.386542	-0.345729	-0.307826	-0.131451	-0.0142563	-0.19862	-0.176021	0.0561935	-0.415223	-0.552997	-0.136882	-0.29036	-0.514474	-0.271268	-0.185907	0.0214579	0.0664045	0.392377	0.471154	-0.0546048	0.23387	0.219289	0.4727	0.402471	0.688487	0.679545	0.403851	0.654382	0.626308	0.687192	0.473392	0.508091	0.669837	0.758511	0.794254	0.633942	0.66903
Grpel1	0.0630032	0.108979	-0.118471	0.168644	-0.33939	-0.312836	0.526381	0.783387	0.694757	0.77491	0.56032	0.478401	0.527607	-0.0985563	-0.202943	0.0330991	0.0826763	-0.176576	0.270233	0.435534	0.232508	0.441622	0.577564	0.374408	0.300023	-0.0355642	-0.0167709	-0.344262	-0.472371	-0.00418884	-0.318477	-0.176	-0.651406	-0.547035	-0.811666	-0.788519	-0.243336	-0.57256	-0.497468	-0.780056	-0.553184	-0.560559	-0.732499	-0.798566	-0.74344	-0.637998	-0.629924
Grpr	0.00417051	0.124251	-0.0140414	0.311109	-0.119002	-0.0559677	0.397308	0.476166	0.577019	0.668876	0.593436	0.405461	0.513606	-0.210484	-0.387498	-0.2167	-0.156405	-0.343034	0.0980896	0.118378	0.114824	0.253144	0.169689	0.0912651	0.0820505	-0.151266	-0.215522	-0.25911	-0.448703	-0.0581481	-0.274864	-0.0492717	-0.578153	-0.556612	-0.594638	-0.6308	-0.0740385	-0.175811	-0.0806281	-0.474939	-0.365797	-0.312706	-0.49827	-0.473238	-0.333089	-0.383784	-0.327769
Grsf1	0.081403	-0.0215044	0.128065	-0.16339	0.315497	0.222867	-0.359436	-0.543769	-0.583867	-0.715744	-0.61681	-0.478355	-0.606045	0.294683	0.400176	0.18496	0.0854792	0.299486	-0.0598404	-0.168179	-0.225791	-0.419051	-0.389788	-0.292016	-0.260544	0.0825575	0.0494297	0.226012	0.393669	0.066658	0.317484	0.0715766	0.65934	0.575355	0.702305	0.693585	0.026516	0.282191	0.176279	0.621094	0.461276	0.425405	0.583975	0.590374	0.445426	0.453025	0.396827
Grtp1	0.050003	-0.0430512	0.139509	-0.169302	0.353257	0.271609	-0.429948	-0.652585	-0.656063	-0.784233	-0.644513	-0.514847	-0.629987	0.263279	0.372422	0.134338	0.0403256	0.28326	-0.121955	-0.258067	-0.248483	-0.462172	-0.480333	-0.344966	-0.298091	0.0717191	0.0358354	0.273689	0.440686	0.0539213	0.341709	0.107225	0.706469	0.607976	0.786954	0.771443	0.08772	0.389137	0.284154	0.716007	0.523731	0.498464	0.67054	0.695794	0.56611	0.54012	0.493696
Gsdmd	-0.00573554	-0.0891152	0.0550539	-0.213214	0.187403	0.137352	-0.372126	-0.500691	-0.532131	-0.614963	-0.511164	-0.381484	-0.463673	0.167447	0.292708	0.121374	0.0658616	0.250298	-0.122654	-0.189455	-0.145545	-0.291573	-0.281766	-0.179582	-0.152023	0.0925301	0.113342	0.241696	0.387968	0.0383365	0.256154	0.077769	0.532939	0.484342	0.587071	0.597103	0.0996671	0.267589	0.188267	0.510649	0.378898	0.350366	0.504344	0.50995	0.408616	0.407368	0.370608
Gsn	-0.379438	-0.472384	-0.245742	-0.665093	-0.268187	-0.185624	-0.730077	-0.680444	-0.753816	-0.698449	-0.517074	-0.279722	-0.251638	-0.211834	0.133951	0.0188294	0.104139	0.305378	-0.464042	-0.368522	0.108802	0.0582164	0.0508635	0.231089	0.248585	0.251914	0.552262	0.506663	0.707851	-0.0372044	0.205683	0.141004	0.437985	0.524116	0.551244	0.669287	0.466626	0.337414	0.29809	0.402705	0.307544	0.269069	0.546	0.528347	0.504497	0.505641	0.508284
Gspt2	-0.0726995	0.00472513	-0.156499	0.103352	-0.367419	-0.285671	0.360655	0.585402	0.573005	0.698235	0.571614	0.471945	0.580214	-0.259844	-0.333714	-0.112706	-0.0176208	-0.23719	0.0903835	0.234607	0.25046	0.453427	0.481948	0.360152	0.313433	-0.0430298	0.0179914	-0.226604	-0.366834	-0.0510827	-0.311477	-0.0981118	-0.642102	-0.537658	-0.717813	-0.691056	-0.0575242	-0.365697	-0.270022	-0.666296	-0.484468	-0.46661	-0.608577	-0.63879	-0.521999	-0.488816	-0.447114
Gstp1	0.145772	0.209614	0.00429281	0.316336	-0.121831	-0.125176	0.542193	0.678027	0.659541	0.696603	0.517484	0.385302	0.414621	-0.0129001	-0.188083	-0.00737494	0.00102417	-0.219117	0.294385	0.360403	0.108374	0.2523	0.322197	0.14949	0.102185	-0.107208	-0.190133	-0.363021	-0.510517	0.00304455	-0.262625	-0.143471	-0.543689	-0.508697	-0.66727	-0.69212	-0.277931	-0.432915	-0.370814	-0.595283	-0.431253	-0.41919	-0.612704	-0.641955	-0.591243	-0.537704	-0.528737
Gtf2h3	0.101824	0.0833611	-0.142716	0.0403902	-0.372245	-0.384648	0.477064	0.77414	0.582087	0.62446	0.373035	0.38391	0.372931	0.0247659	-0.00839309	0.201036	0.222384	-0.0117866	0.325274	0.535324	0.234498	0.427018	0.675835	0.442458	0.345204	0.0480065	0.106451	-0.313885	-0.364183	0.0377833	-0.252912	-0.214927	-0.506614	-0.381466	-0.722056	-0.66939	-0.305439	-0.682419	-0.645081	-0.757584	-0.517388	-0.564061	-0.681497	-0.79026	-0.813684	-0.631114	-0.660383
Guca2a	0.168001	0.339968	0.187889	0.640681	0.206554	0.225246	0.558948	0.470193	0.692156	0.72796	0.671136	0.359203	0.449547	-0.0902576	-0.432079	-0.303923	-0.30463	-0.484065	0.201128	0.0717756	-0.0595842	0.0101638	-0.176581	-0.243745	-0.217901	-0.302598	-0.555578	-0.380197	-0.645828	-0.0507943	-0.25574	-0.0265906	-0.552403	-0.636846	-0.532782	-0.655867	-0.189117	-0.0413685	0.0523126	-0.32261	-0.277025	-0.184965	-0.458348	-0.375835	-0.221186	-0.351999	-0.287902
Guca2b	0.184855	0.295191	0.0651638	0.48424	-0.0393013	-0.0375948	0.657838	0.748794	0.802148	0.844926	0.667902	0.452461	0.505671	-0.0362688	-0.300117	-0.100581	-0.0946104	-0.345726	0.326495	0.343095	0.0750853	0.22346	0.227149	0.0525666	0.0188477	-0.190871	-0.345801	-0.442536	-0.656601	-0.012507	-0.311975	-0.135891	-0.653115	-0.649708	-0.75692	-0.818333	-0.3084	-0.396828	-0.31293	-0.626881	-0.467738	-0.428206	-0.686039	-0.68595	-0.593418	-0.586909	-0.559292
Guk1	0.357311	0.412836	0.152309	0.53401	0.0950972	0.0130331	0.747558	0.811575	0.78555	0.743958	0.503552	0.332586	0.29104	0.213992	-0.0664394	0.0899604	0.0190791	-0.217163	0.50333	0.502419	-0.0145264	0.0852906	0.198903	-0.0331356	-0.0844972	-0.17338	-0.394354	-0.514211	-0.678456	0.0532856	-0.23607	-0.195663	-0.491164	-0.517411	-0.66792	-0.741824	-0.500828	-0.526306	-0.490869	-0.57237	-0.41291	-0.405549	-0.65996	-0.690671	-0.697569	-0.621026	-0.641743
H1f0	0.123785	0.148604	-0.0536697	0.1858	-0.213166	-0.222332	0.485353	0.678187	0.587643	0.622307	0.422666	0.358184	0.366634	0.0102071	-0.0967955	0.0835681	0.0946287	-0.117565	0.294162	0.414613	0.150935	0.30471	0.446601	0.257907	0.19254	-0.0367891	-0.0587324	-0.323025	-0.420502	0.0188876	-0.240718	-0.165695	-0.491265	-0.422337	-0.646979	-0.638978	-0.277749	-0.512426	-0.465537	-0.624252	-0.438957	-0.45253	-0.603172	-0.664026	-0.64944	-0.544427	-0.552973
H2.K2	0.174834	0.300561	0.166756	0.526285	0.186974	0.183419	0.479052	0.408479	0.565143	0.576413	0.511364	0.270808	0.322428	-0.0172888	-0.296157	-0.198013	-0.214888	-0.360935	0.207349	0.104301	-0.0622194	-0.0125401	-0.132993	-0.204652	-0.189906	-0.238129	-0.454419	-0.327942	-0.531503	-0.0255881	-0.194415	-0.0391718	-0.419497	-0.491012	-0.424446	-0.524853	-0.200668	-0.0766262	-0.0111461	-0.263978	-0.221975	-0.156102	-0.377509	-0.320381	-0.218416	-0.304129	-0.263857
H2afy	0.204553	0.231178	-0.00813395	0.280315	-0.158829	-0.193793	0.600299	0.785275	0.687651	0.700506	0.463407	0.376694	0.364353	0.0826838	-0.0719201	0.117758	0.104296	-0.133601	0.389059	0.4965	0.123509	0.277174	0.442616	0.217882	0.146002	-0.0653265	-0.136939	-0.404298	-0.519104	0.0359286	-0.256204	-0.196927	-0.523824	-0.469849	-0.7096	-0.718359	-0.375563	-0.586612	-0.543003	-0.674484	-0.474252	-0.489225	-0.676003	-0.741374	-0.741917	-0.622374	-0.640298
H2afz	0.134756	0.0897686	-0.120337	0.00936284	-0.322214	-0.359774	0.434837	0.71056	0.492696	0.505013	0.25511	0.299366	0.25508	0.103035	0.0901286	0.26456	0.261895	0.0594471	0.342698	0.542582	0.19678	0.357732	0.635301	0.404711	0.306859	0.0703786	0.12254	-0.288996	-0.30346	0.0581403	-0.196836	-0.216753	-0.388667	-0.274751	-0.612896	-0.559074	-0.329564	-0.673325	-0.659013	-0.67041	-0.44885	-0.508157	-0.598545	-0.714848	-0.77647	-0.576354	-0.622279
Hacl1	-0.261305	-0.322727	-0.0813177	-0.44019	0.0135295	0.0581855	-0.668221	-0.771803	-0.748115	-0.745358	-0.5277	-0.371144	-0.364285	-0.105427	0.130384	-0.0440056	-0.0112872	0.224986	-0.414	-0.447831	-0.0483299	-0.174374	-0.270199	-0.0602395	-0.00898871	0.14499	0.302485	0.454541	0.615584	-0.0295451	0.257847	0.176011	0.535018	0.53051	0.691033	0.742123	0.404257	0.497706	0.447474	0.6046	0.43698	0.427164	0.658987	0.690302	0.668213	0.600323	0.606701
Hapln4	0.128919	0.200517	0.00771737	0.319159	-0.109486	-0.105246	0.517086	0.637752	0.63906	0.681032	0.51975	0.379084	0.417786	-0.0353777	-0.212231	-0.0376303	-0.0242919	-0.23546	0.265563	0.319803	0.101977	0.240323	0.285423	0.12896	0.0886766	-0.115426	-0.199803	-0.345672	-0.498118	-0.00493443	-0.258553	-0.127473	-0.53688	-0.507482	-0.642742	-0.671169	-0.248775	-0.386306	-0.321065	-0.563154	-0.411502	-0.393072	-0.584331	-0.6041	-0.542061	-0.505788	-0.490502
Haus8	0.19949	0.24706	0.0392036	0.334887	-0.0628611	-0.093082	0.55724	0.672768	0.63666	0.644729	0.453794	0.33396	0.33317	0.0676429	-0.113743	0.045853	0.0282841	-0.17939	0.341485	0.39326	0.0700168	0.191338	0.286974	0.103665	0.0543191	-0.105016	-0.213208	-0.377136	-0.508004	0.022907	-0.229918	-0.155276	-0.475163	-0.454996	-0.614576	-0.64618	-0.3308	-0.450389	-0.404995	-0.55135	-0.395815	-0.392031	-0.581686	-0.616531	-0.596625	-0.527644	-0.533057
Hcfc1r1	0.318798	0.372174	0.16527	0.490048	0.148992	0.0732275	0.62059	0.632993	0.637412	0.590614	0.405728	0.246244	0.207642	0.199347	-0.0559493	0.0555745	-0.0149666	-0.197223	0.419387	0.385346	-0.0518486	0.00972403	0.0782557	-0.101581	-0.134345	-0.16804	-0.383434	-0.429294	-0.572872	0.0447568	-0.178021	-0.149018	-0.373379	-0.417868	-0.505022	-0.582062	-0.420461	-0.383932	-0.357805	-0.41146	-0.301098	-0.287568	-0.505162	-0.517212	-0.52181	-0.478052	-0.493597
Hdac11	-0.20538	-0.186438	0.0574985	-0.157804	0.23955	0.290602	-0.563214	-0.806572	-0.624671	-0.625713	-0.356244	-0.34211	-0.297482	-0.136191	-0.0465006	-0.234301	-0.214575	0.0177623	-0.415875	-0.578769	-0.158936	-0.319866	-0.5742	-0.322618	-0.229026	-0.00733657	0.0108529	0.378851	0.439011	-0.0602133	0.229788	0.229905	0.461259	0.375075	0.691422	0.668245	0.403954	0.692902	0.669546	0.709856	0.484326	0.529378	0.675358	0.777637	0.826352	0.644202	0.685809
Hdac4	0.295328	0.31662	0.106296	0.375668	0.0513492	-0.0261427	0.58285	0.655777	0.594783	0.551061	0.342898	0.240642	0.187768	0.209073	0.012702	0.132737	0.0686437	-0.115065	0.421988	0.442957	-0.00313685	0.0754958	0.209887	0.0110457	-0.0398294	-0.106023	-0.26353	-0.40164	-0.505611	0.0568341	-0.170679	-0.172735	-0.351689	-0.361236	-0.515092	-0.561283	-0.42175	-0.469707	-0.453413	-0.463984	-0.327252	-0.336107	-0.520442	-0.562168	-0.594502	-0.503119	-0.532694
Hdac6	0.19526	0.271926	0.073063	0.409558	-0.00379711	-0.0232015	0.567181	0.638834	0.660555	0.675351	0.511493	0.346062	0.36617	0.032273	-0.188428	-0.0329081	-0.0466856	-0.251748	0.315229	0.327177	0.0424104	0.154459	0.187726	0.0275576	-0.00565172	-0.151478	-0.293962	-0.38425	-0.548012	0.00644544	-0.240127	-0.128802	-0.501661	-0.504592	-0.607426	-0.660158	-0.303994	-0.365713	-0.308439	-0.509824	-0.376302	-0.35243	-0.56434	-0.573236	-0.522218	-0.497312	-0.486965
Hdc	0.115465	0.17878	-0.00184694	0.282653	-0.117419	-0.112691	0.47795	0.599503	0.592752	0.633471	0.480037	0.355603	0.391018	-0.0347665	-0.192129	-0.0269745	-0.0126951	-0.210791	0.24691	0.305403	0.103186	0.235624	0.285527	0.137118	0.09714	-0.0998286	-0.170159	-0.31904	-0.456971	-0.00375397	-0.241988	-0.12188	-0.501657	-0.469015	-0.604242	-0.626506	-0.230827	-0.371865	-0.311544	-0.535101	-0.389514	-0.374928	-0.549515	-0.571705	-0.516219	-0.476593	-0.463621
Hdgfrp3	-0.178202	-0.245476	-0.090548	-0.369892	-0.0527408	-0.029968	-0.462551	-0.489033	-0.525761	-0.527225	-0.404448	-0.2569	-0.268848	-0.0462648	0.150851	0.0390404	0.0602805	0.216197	-0.259923	-0.243716	-0.00261306	-0.0766908	-0.0852759	0.0358871	0.0555082	0.141607	0.28304	0.315375	0.453521	-0.00650228	0.180485	0.0951987	0.379444	0.39974	0.454779	0.50995	0.253419	0.258274	0.214855	0.364838	0.273215	0.248487	0.425759	0.423017	0.381938	0.37604	0.366978
Hdlbp	0.144502	0.198163	-0.0343228	0.28394	-0.201771	-0.204108	0.584661	0.775987	0.716987	0.763161	0.548864	0.434117	0.461125	-0.0159759	-0.176284	0.033832	0.0495848	-0.19973	0.327931	0.436915	0.154945	0.32909	0.445364	0.24076	0.176775	-0.0828414	-0.138395	-0.38963	-0.532708	0.00895071	-0.293541	-0.174524	-0.603812	-0.541852	-0.760522	-0.769019	-0.308117	-0.536943	-0.47164	-0.70472	-0.503619	-0.502946	-0.700409	-0.750832	-0.707932	-0.620197	-0.617349
Hectd3	-0.0981465	-0.0766643	0.133282	-0.0300036	0.346466	0.360981	-0.440371	-0.718316	-0.533172	-0.569558	-0.333508	-0.349607	-0.335034	-0.0323821	-0.00584547	-0.198252	-0.215767	-9.7e-05	-0.306538	-0.504078	-0.217078	-0.394365	-0.632993	-0.414139	-0.322356	-0.0497941	-0.105969	0.289964	0.331511	-0.038119	0.230133	0.202281	0.460089	0.342898	0.663941	0.613352	0.288679	0.64098	0.608998	0.701275	0.47755	0.523506	0.629129	0.732904	0.760185	0.585518	0.615323
Herc3	-0.263058	-0.331444	-0.111579	-0.463759	-0.0493799	-0.00322586	-0.633774	-0.694012	-0.700672	-0.690012	-0.499594	-0.330791	-0.324705	-0.110069	0.136355	-0.0142485	0.0248158	0.23753	-0.388422	-0.388923	-0.0113875	-0.113166	-0.174169	0.0110372	0.0494554	0.162903	0.341474	0.432976	0.596191	-0.025601	0.232195	0.152074	0.484835	0.501379	0.615545	0.679115	0.381469	0.417133	0.370099	0.517422	0.378972	0.360801	0.588579	0.603838	0.576924	0.53482	0.536997
Herpud2	-0.166425	-0.200595	-0.00230391	-0.26134	0.117733	0.141107	-0.508262	-0.650225	-0.590025	-0.605675	-0.416469	-0.326098	-0.325656	-0.0503681	0.0934405	-0.0667402	-0.0589102	0.141714	-0.31464	-0.392188	-0.0974581	-0.225557	-0.340623	-0.160335	-0.105672	0.0718075	0.142285	0.342129	0.452008	-0.0227589	0.222312	0.155562	0.456674	0.418178	0.599943	0.614295	0.302587	0.462795	0.42041	0.55736	0.39573	0.4005	0.566184	0.611566	0.598365	0.514605	0.522896
Hexb	-0.398002	-0.491492	-0.267445	-0.688578	-0.306153	-0.215997	-0.734747	-0.665609	-0.746649	-0.681603	-0.503568	-0.260539	-0.225903	-0.234008	0.122721	0.0178702	0.112238	0.306619	-0.473657	-0.36241	0.131017	0.0923164	0.0909815	0.268417	0.282396	0.261855	0.579808	0.511449	0.713436	-0.0407195	0.193968	0.138041	0.414745	0.512489	0.524941	0.650628	0.478422	0.320346	0.284886	0.371732	0.286336	0.246144	0.525831	0.503716	0.484302	0.490776	0.495088
Hexdc	-0.142463	-0.118479	0.097218	-0.0742983	0.288983	0.321159	-0.471164	-0.725739	-0.542415	-0.559639	-0.316506	-0.325501	-0.294559	-0.083799	-0.0363988	-0.217094	-0.216076	-0.0039092	-0.344312	-0.522084	-0.18354	-0.345428	-0.588761	-0.36287	-0.272503	-0.0354619	-0.060413	0.313791	0.356164	-0.0488691	0.215986	0.208429	0.431648	0.331035	0.642151	0.603267	0.330204	0.644364	0.619986	0.674556	0.458332	0.504739	0.619428	0.721261	0.761991	0.58597	0.622163
Hgsnat	-0.247977	-0.283822	-0.0535212	-0.357055	0.0508415	0.101147	-0.613555	-0.739239	-0.676022	-0.667325	-0.445966	-0.333213	-0.310764	-0.126482	0.0650868	-0.0984457	-0.0641606	0.156174	-0.404641	-0.46311	-0.0621843	-0.184431	-0.318125	-0.106715	-0.0478164	0.101928	0.225318	0.417304	0.542873	-0.0398825	0.230386	0.182311	0.474294	0.454727	0.643268	0.676239	0.396276	0.52158	0.484118	0.587539	0.417135	0.422467	0.621744	0.66918	0.671947	0.577446	0.595078
Higd2a	-0.0484773	0.107092	-0.0671107	0.340742	-0.233461	-0.131111	0.478184	0.615425	0.736826	0.879096	0.785969	0.55599	0.714152	-0.332577	-0.532206	-0.294866	-0.194078	-0.441749	0.0847883	0.140796	0.194408	0.394681	0.288517	0.191971	0.176087	-0.173179	-0.213915	-0.307166	-0.548658	-0.0867426	-0.373945	-0.0601204	-0.784275	-0.73278	-0.802038	-0.831931	-0.0489321	-0.236025	-0.104317	-0.6568	-0.502536	-0.435519	-0.66305	-0.63629	-0.441399	-0.503219	-0.424521
Hilpda	0.315771	0.332529	0.102204	0.384778	0.0330819	-0.0511075	0.627771	0.721165	0.640867	0.594659	0.362654	0.263073	0.203134	0.228005	0.0265802	0.160128	0.0923195	-0.108963	0.459939	0.49522	0.00830902	0.0985524	0.258848	0.0379142	-0.0215142	-0.102349	-0.260996	-0.432124	-0.537537	0.0640921	-0.185747	-0.193417	-0.381342	-0.383728	-0.566198	-0.609726	-0.459221	-0.531011	-0.514858	-0.519361	-0.364075	-0.378365	-0.572526	-0.624373	-0.664792	-0.555115	-0.59003
Hist1h1a	0.164197	0.149587	-0.0890512	0.122049	-0.28992	-0.323827	0.536744	0.799613	0.619538	0.638997	0.377269	0.366537	0.338573	0.0859675	0.0127814	0.211813	0.209646	-0.0264715	0.379889	0.55897	0.188862	0.364032	0.610325	0.366217	0.272158	0.0175095	0.0260878	-0.35816	-0.420037	0.0491688	-0.244428	-0.222965	-0.491109	-0.390775	-0.713357	-0.680639	-0.364382	-0.685822	-0.654443	-0.734042	-0.502373	-0.545724	-0.685211	-0.787785	-0.821864	-0.643545	-0.678185
Hist1h2ab	0.124689	0.0797412	-0.134011	-0.00275591	-0.347372	-0.380349	0.437057	0.726516	0.503259	0.521871	0.267965	0.314839	0.274723	0.0894644	0.0819755	0.264532	0.267527	0.058702	0.339775	0.550352	0.211799	0.381566	0.664035	0.429876	0.329262	0.0758844	0.138431	-0.289451	-0.304567	0.0561255	-0.206524	-0.220176	-0.408054	-0.286424	-0.635635	-0.577146	-0.325137	-0.688727	-0.671523	-0.69563	-0.466273	-0.52669	-0.617045	-0.736601	-0.795242	-0.590955	-0.635888
Hist1h2ak	0.115998	0.118904	-0.107166	0.114579	-0.31483	-0.325153	0.50595	0.767465	0.616767	0.658739	0.42037	0.393574	0.392994	0.0154397	-0.0562012	0.150686	0.169098	-0.0670354	0.325026	0.501969	0.206717	0.391011	0.598441	0.375473	0.289102	0.00800584	0.0303549	-0.334561	-0.41185	0.0295031	-0.261612	-0.201209	-0.528713	-0.424447	-0.72504	-0.69166	-0.30561	-0.632846	-0.588045	-0.732921	-0.507094	-0.539329	-0.679796	-0.770119	-0.774472	-0.621676	-0.641525
Hist1h2bc	-0.0328511	0.102105	-0.0240555	0.309521	-0.130263	-0.0489809	0.370228	0.442516	0.570474	0.678991	0.624998	0.422337	0.552121	-0.265104	-0.442932	-0.268664	-0.193102	-0.377223	0.0525805	0.0668342	0.124082	0.266681	0.148247	0.0892114	0.0876235	-0.161512	-0.218149	-0.238851	-0.441286	-0.0740756	-0.285648	-0.0294181	-0.602465	-0.580623	-0.595584	-0.633021	-0.0257993	-0.124679	-0.0192261	-0.464023	-0.362928	-0.299947	-0.486351	-0.449618	-0.28537	-0.359413	-0.291213
Hist1h2bm	0.194357	0.227578	-0.000469559	0.287625	-0.139976	-0.170231	0.579789	0.747599	0.668332	0.683153	0.461933	0.366935	0.361019	0.068676	-0.0896114	0.0925239	0.0812127	-0.147454	0.366707	0.46072	0.113143	0.259383	0.402582	0.192263	0.127102	-0.0743488	-0.151002	-0.390478	-0.509511	0.0299894	-0.249991	-0.182704	-0.51255	-0.465869	-0.682648	-0.696084	-0.353424	-0.543304	-0.497954	-0.640165	-0.452625	-0.461874	-0.647213	-0.7036	-0.695633	-0.591831	-0.604815
Hist1h4d	0.112479	0.0968023	-0.0997055	0.0641151	-0.282674	-0.302864	0.426959	0.665664	0.505309	0.530963	0.312954	0.315714	0.298034	0.0488512	0.00631733	0.178792	0.186635	-0.0118336	0.298963	0.465399	0.180131	0.335716	0.548208	0.345475	0.263843	0.0303702	0.0606349	-0.283001	-0.328352	0.037656	-0.209103	-0.186234	-0.419129	-0.322692	-0.605705	-0.568458	-0.284096	-0.582008	-0.553744	-0.631445	-0.431164	-0.470319	-0.577351	-0.668009	-0.694119	-0.539317	-0.567209
Hist2h4	0.20087	0.236549	0.0121689	0.302327	-0.11682	-0.149345	0.578313	0.73235	0.662037	0.67296	0.457224	0.356532	0.349483	0.0751338	-0.0902031	0.0855768	0.0705971	-0.153019	0.366014	0.448859	0.0999458	0.238937	0.373052	0.167552	0.105837	-0.0821925	-0.169089	-0.390258	-0.511531	0.0299478	-0.243679	-0.177735	-0.500431	-0.461288	-0.665004	-0.683567	-0.353766	-0.524307	-0.480036	-0.617829	-0.437979	-0.444682	-0.631735	-0.683486	-0.674939	-0.578061	-0.590362
Hn1l	0.0259803	-0.0173944	-0.21591	-0.11189	-0.476167	-0.471626	0.359601	0.70182	0.469405	0.528497	0.290553	0.359545	0.352605	-0.0190021	0.0257619	0.231099	0.273978	0.0610851	0.254849	0.511157	0.285643	0.487361	0.764306	0.546274	0.441856	0.113405	0.248707	-0.23055	-0.238177	0.0342119	-0.231832	-0.206811	-0.45809	-0.298736	-0.67224	-0.585797	-0.232372	-0.681913	-0.650347	-0.747499	-0.502541	-0.5641	-0.629219	-0.754974	-0.788146	-0.583541	-0.616207
Hnmt	-0.100363	-0.176504	-0.0450515	-0.30586	0.0107657	0.00295981	-0.386697	-0.428018	-0.480385	-0.511158	-0.417808	-0.27517	-0.31684	0.0426084	0.209285	0.0912108	0.0833241	0.23104	-0.176883	-0.175253	-0.0395543	-0.126141	-0.104707	-0.0113464	0.00285538	0.127302	0.226234	0.259792	0.397971	0.0151351	0.190018	0.0694607	0.399489	0.403282	0.447316	0.489401	0.165406	0.202479	0.147421	0.358812	0.27181	0.241061	0.399832	0.390582	0.322446	0.334976	0.311886
Hnrnpm	0.0685929	0.0464512	-0.163329	-0.00627967	-0.396807	-0.39982	0.424684	0.726655	0.533179	0.583215	0.346564	0.371231	0.366517	-0.000975322	-0.0103157	0.193664	0.224302	0.00261507	0.28644	0.503914	0.246186	0.437798	0.681293	0.462358	0.366984	0.0640653	0.145695	-0.277079	-0.316315	0.0322849	-0.242987	-0.202975	-0.485459	-0.353045	-0.690191	-0.629005	-0.265686	-0.654636	-0.61763	-0.734073	-0.499977	-0.547776	-0.647013	-0.755645	-0.776068	-0.596473	-0.623352
Hnrnpul1	-0.25742	-0.372196	-0.171905	-0.584771	-0.157321	-0.127166	-0.639861	-0.620994	-0.7244	-0.721728	-0.58009	-0.338137	-0.364102	-0.057631	0.251998	0.114195	0.149334	0.351617	-0.341599	-0.27194	0.0411684	-0.0396992	0.00415415	0.14728	0.157508	0.238978	0.475998	0.438185	0.652325	0.000570816	0.240722	0.105107	0.511496	0.569239	0.583897	0.683281	0.334592	0.265693	0.201413	0.42996	0.333184	0.28201	0.542811	0.513985	0.438267	0.470597	0.447573
Hoga1	-0.159378	-0.305302	-0.103468	-0.55404	-0.0379308	-0.0583026	-0.626039	-0.652336	-0.785438	-0.838723	-0.712931	-0.446326	-0.529325	0.0942712	0.394764	0.211309	0.196907	0.429394	-0.261703	-0.223418	-0.0366877	-0.16531	-0.0780122	0.051172	0.0598023	0.243497	0.432686	0.421199	0.669328	0.0374007	0.309987	0.0882336	0.656132	0.683253	0.703828	0.789805	0.243256	0.249663	0.152446	0.533143	0.414203	0.348071	0.620447	0.583304	0.44921	0.506885	0.457104
Homer1	0.153729	0.178855	-0.0461177	0.21872	-0.213995	-0.231476	0.545262	0.749763	0.648633	0.678902	0.455571	0.383718	0.385706	0.0329362	-0.0913397	0.102459	0.107149	-0.124819	0.339311	0.465508	0.153779	0.317104	0.477433	0.266311	0.194371	-0.0442313	-0.0793002	-0.364193	-0.470346	0.0256658	-0.258605	-0.185624	-0.527714	-0.457564	-0.702852	-0.69783	-0.322772	-0.567999	-0.519937	-0.677305	-0.475704	-0.491608	-0.65988	-0.727047	-0.717572	-0.599836	-0.612385
Hpd	0.216084	0.381098	0.237066	0.679126	0.29477	0.290568	0.559879	0.428007	0.656096	0.663815	0.612022	0.298674	0.365807	-0.0220671	-0.380203	-0.281367	-0.307292	-0.465473	0.228475	0.0662016	-0.113569	-0.0755198	-0.263708	-0.326418	-0.294497	-0.315566	-0.605395	-0.385125	-0.642135	-0.0373295	-0.21761	-0.0230036	-0.47481	-0.584926	-0.453475	-0.59117	-0.222682	-0.010105	0.0692541	-0.240735	-0.218318	-0.126959	-0.398855	-0.310522	-0.176378	-0.311151	-0.255624
Hpn	-0.237503	-0.392712	-0.214247	-0.673322	-0.237025	-0.226053	-0.628322	-0.544928	-0.73284	-0.742175	-0.647954	-0.345907	-0.404265	0.00301952	0.359411	0.232081	0.258535	0.449465	-0.285314	-0.158944	0.0790869	0.0141889	0.152299	0.253986	0.239232	0.299905	0.577872	0.430523	0.686877	0.0266602	0.248441	0.0600731	0.535123	0.624672	0.552697	0.679704	0.277416	0.125681	0.0449998	0.352344	0.292312	0.212269	0.496537	0.429222	0.307592	0.406314	0.359491
Hsf1	0.244912	0.350012	0.142607	0.54316	0.104907	0.0773297	0.637763	0.651084	0.728459	0.731847	0.57662	0.353504	0.378091	0.0511662	-0.237807	-0.0884531	-0.117322	-0.328218	0.345312	0.302699	-0.0124994	0.0826607	0.0654963	-0.0893753	-0.1084	-0.216095	-0.427793	-0.435257	-0.639017	0.00211876	-0.249413	-0.117846	-0.52684	-0.566873	-0.614297	-0.700474	-0.336538	-0.312453	-0.248413	-0.475146	-0.361334	-0.318246	-0.571081	-0.554977	-0.485631	-0.498172	-0.479011
Hsp90b1	-0.00681026	0.0397358	-0.166258	0.0913534	-0.407034	-0.355785	0.450006	0.728068	0.640717	0.744818	0.552604	0.486846	0.557332	-0.169164	-0.23564	0.00448157	0.0788708	-0.170829	0.19875	0.384893	0.269872	0.49022	0.612498	0.43107	0.358525	-0.0112303	0.0538248	-0.288783	-0.407714	-0.0197231	-0.321216	-0.157219	-0.656164	-0.532544	-0.797926	-0.758205	-0.167792	-0.53629	-0.454344	-0.776134	-0.550623	-0.557275	-0.705397	-0.771068	-0.699559	-0.601362	-0.584486
Hspa1a	0.00253572	0.0561899	-0.105551	0.127074	-0.279465	-0.23618	0.374748	0.567374	0.531035	0.614085	0.473566	0.392658	0.457542	-0.144306	-0.225405	-0.0375063	0.0201106	-0.178271	0.15349	0.275419	0.193053	0.361181	0.42451	0.290394	0.241747	-0.0392827	-0.0141902	-0.241872	-0.356694	-0.0228389	-0.260772	-0.112517	-0.536066	-0.453966	-0.632127	-0.61518	-0.129172	-0.382914	-0.311965	-0.593564	-0.426791	-0.420626	-0.554704	-0.592026	-0.519723	-0.465961	-0.444788
Hspa2	-0.231724	-0.217847	-0.0428337	-0.211012	0.0304805	0.1008	-0.445715	-0.553437	-0.443261	-0.404203	-0.211784	-0.180627	-0.118823	-0.1958	-0.0854811	-0.186329	-0.134218	0.0142424	-0.356243	-0.418081	-0.0316661	-0.105855	-0.27797	-0.097113	-0.0394872	0.0322004	0.115721	0.306495	0.353441	-0.0609837	0.125967	0.163908	0.253628	0.234207	0.417747	0.430068	0.356119	0.461105	0.459846	0.414732	0.282134	0.310508	0.431169	0.49211	0.548991	0.429922	0.469222
Hspa5	0.17584	0.202844	-0.0270481	0.24899	-0.185068	-0.209915	0.56786	0.760391	0.664034	0.686528	0.459355	0.379041	0.375454	0.0537758	-0.0854327	0.105277	0.101859	-0.131457	0.358942	0.474119	0.137933	0.295574	0.45453	0.239393	0.168598	-0.0557149	-0.108787	-0.38083	-0.491858	0.0294463	-0.256608	-0.188572	-0.524356	-0.462991	-0.701868	-0.704106	-0.343851	-0.569586	-0.523262	-0.670533	-0.471629	-0.486108	-0.662923	-0.727731	-0.721443	-0.605522	-0.61973
Hspa8	-0.00336037	0.0495873	-0.144442	0.114171	-0.363955	-0.313607	0.4347	0.683843	0.618446	0.717736	0.542208	0.464977	0.536847	-0.166773	-0.244143	-0.0178502	0.05231	-0.18437	0.185062	0.348248	0.245285	0.450795	0.548725	0.382274	0.318237	-0.0262795	0.0221238	-0.27959	-0.402968	-0.0227294	-0.30764	-0.142288	-0.630197	-0.521145	-0.755628	-0.725399	-0.155782	-0.485324	-0.404413	-0.723908	-0.516576	-0.516836	-0.665598	-0.720046	-0.643799	-0.563565	-0.543328
Hspd1	0.0852364	0.0808939	-0.114133	0.0630437	-0.307294	-0.312771	0.422097	0.667292	0.521491	0.562671	0.35272	0.344298	0.344071	0.00439056	-0.0394209	0.143997	0.165444	-0.0398468	0.27343	0.443436	0.1973	0.363956	0.557495	0.361837	0.282662	0.0243519	0.0638348	-0.277735	-0.335253	0.0259557	-0.227614	-0.178123	-0.45839	-0.356556	-0.634038	-0.595506	-0.25552	-0.566293	-0.528163	-0.65172	-0.448722	-0.481663	-0.593482	-0.678855	-0.686087	-0.543268	-0.562277
Hsph1	0.0473409	0.113262	-0.0886009	0.207391	-0.276165	-0.240105	0.488594	0.695001	0.658711	0.741259	0.565823	0.455264	0.520005	-0.127669	-0.251672	-0.0350394	0.0168519	-0.220985	0.222281	0.346636	0.198399	0.386677	0.461945	0.293936	0.237821	-0.0672375	-0.0718064	-0.319413	-0.463599	-0.0187236	-0.304459	-0.140449	-0.627103	-0.546272	-0.747253	-0.740658	-0.196385	-0.460853	-0.380839	-0.691661	-0.498417	-0.489229	-0.664057	-0.704805	-0.626997	-0.564821	-0.543802
Hyal2	0.067325	0.149376	-0.0321123	0.276832	-0.170869	-0.140072	0.474887	0.614872	0.628713	0.697962	0.554271	0.41225	0.478162	-0.113552	-0.271373	-0.0831794	-0.0439892	-0.257844	0.206192	0.276375	0.139322	0.295113	0.317418	0.177434	0.139685	-0.107434	-0.15812	-0.313217	-0.472104	-0.0236454	-0.278591	-0.111513	-0.578603	-0.533061	-0.666107	-0.68407	-0.184318	-0.357319	-0.279179	-0.584754	-0.429682	-0.405556	-0.58915	-0.604679	-0.516863	-0.494073	-0.466198
Hyou1	0.149356	0.193549	-0.0540678	0.26215	-0.242915	-0.248277	0.607196	0.829313	0.742394	0.789909	0.553802	0.453405	0.474445	-0.00666862	-0.156295	0.0674106	0.0841494	-0.179326	0.352189	0.485688	0.177914	0.366398	0.514816	0.290575	0.21629	-0.0657911	-0.106465	-0.404116	-0.540333	0.0154011	-0.305507	-0.194141	-0.62601	-0.549398	-0.804449	-0.803201	-0.331236	-0.600189	-0.5359	-0.760988	-0.539496	-0.547337	-0.744458	-0.808738	-0.775651	-0.664725	-0.667851
Ibtk	0.148384	0.146867	-0.0858778	0.139636	-0.282523	-0.306309	0.530667	0.781955	0.625974	0.654227	0.406479	0.378708	0.364715	0.0548788	-0.0283226	0.172389	0.177607	-0.0582039	0.356538	0.524727	0.187418	0.363251	0.581412	0.349584	0.262021	0.00232301	0.00613707	-0.353285	-0.428727	0.0387984	-0.252846	-0.20958	-0.510558	-0.414941	-0.716234	-0.688836	-0.339647	-0.648123	-0.609392	-0.723904	-0.499489	-0.534157	-0.680046	-0.772131	-0.788826	-0.629778	-0.655723
Ict1	0.117094	0.121286	-0.111336	0.118493	-0.325875	-0.335161	0.520715	0.79025	0.636752	0.681361	0.436779	0.407867	0.408929	0.0118143	-0.0623828	0.151586	0.171743	-0.0720037	0.332336	0.514555	0.214143	0.404814	0.616323	0.387487	0.298874	0.00736503	0.0309022	-0.344153	-0.42505	0.0292525	-0.271088	-0.206313	-0.548068	-0.440408	-0.749056	-0.714734	-0.312075	-0.649728	-0.602651	-0.756212	-0.523583	-0.556091	-0.701336	-0.793698	-0.796321	-0.640335	-0.659892
Id2	-0.0242467	0.0658135	-0.0422254	0.200802	-0.145099	-0.0862605	0.292887	0.38066	0.446013	0.529623	0.468074	0.3342	0.425632	-0.191781	-0.309564	-0.165649	-0.106789	-0.25763	0.059554	0.0976256	0.119056	0.240802	0.186096	0.123066	0.111098	-0.0999114	-0.122784	-0.188452	-0.330604	-0.0492021	-0.224677	-0.0412615	-0.470574	-0.437451	-0.487182	-0.503407	-0.038196	-0.156901	-0.0792959	-0.403436	-0.306951	-0.269234	-0.405357	-0.392791	-0.280237	-0.311062	-0.266196
Ide	0.307649	0.331638	0.0784095	0.391874	-0.0213246	-0.0961412	0.676246	0.804089	0.7159	0.685337	0.433104	0.32481	0.276767	0.198189	-0.00953058	0.153973	0.0980742	-0.133039	0.47604	0.53456	0.0441823	0.162405	0.333442	0.09336	0.0259144	-0.103523	-0.251085	-0.462613	-0.583416	0.0592789	-0.2263	-0.209705	-0.464371	-0.450615	-0.663282	-0.701234	-0.471051	-0.589657	-0.562087	-0.613078	-0.431065	-0.445133	-0.656304	-0.714988	-0.743385	-0.624413	-0.655584
Idnk	0.0107726	0.170019	0.00991635	0.421671	-0.0959984	-0.0180773	0.483611	0.547207	0.701259	0.810745	0.735664	0.484286	0.62195	-0.261169	-0.498419	-0.300085	-0.2297	-0.449237	0.108218	0.105276	0.113956	0.269969	0.135145	0.0542191	0.052995	-0.209627	-0.311911	-0.316464	-0.561144	-0.0767184	-0.329886	-0.0441707	-0.697077	-0.688128	-0.698185	-0.755722	-0.0800238	-0.159874	-0.0412525	-0.534907	-0.419548	-0.344783	-0.579984	-0.534671	-0.35245	-0.438258	-0.363669
Ido1	0.140238	0.2324	0.0107287	0.384166	-0.123845	-0.112233	0.600618	0.734541	0.751505	0.806413	0.626802	0.451415	0.505791	-0.0617879	-0.27487	-0.0694671	-0.0489601	-0.295784	0.295288	0.351928	0.118658	0.28104	0.315707	0.140643	0.0976782	-0.144611	-0.246069	-0.400962	-0.587959	-0.0125204	-0.30794	-0.140457	-0.640685	-0.609171	-0.753815	-0.790368	-0.274731	-0.42763	-0.346538	-0.652428	-0.479633	-0.452505	-0.680228	-0.696642	-0.612809	-0.582752	-0.559239
Ifi27	-0.287448	-0.286734	-0.0401816	-0.302504	0.0789032	0.155635	-0.627792	-0.789221	-0.657739	-0.626605	-0.366372	-0.30238	-0.24253	-0.207964	-0.0469367	-0.20743	-0.154567	0.0673987	-0.466414	-0.558132	-0.0705082	-0.192975	-0.405615	-0.160134	-0.0826549	0.05748	0.163749	0.42872	0.516124	-0.067853	0.208746	0.219566	0.423685	0.388732	0.638819	0.655388	0.461472	0.628248	0.610519	0.620318	0.428275	0.458044	0.638445	0.715769	0.765893	0.617077	0.658463
Ifi30	0.0441814	0.14781	-0.0660632	0.303865	-0.249564	-0.196767	0.549251	0.734343	0.754257	0.854451	0.688844	0.51937	0.614359	-0.182902	-0.359521	-0.122618	-0.0595215	-0.320737	0.215701	0.313745	0.194068	0.394446	0.41243	0.250946	0.205447	-0.121723	-0.159809	-0.359384	-0.553436	-0.0388613	-0.349363	-0.127536	-0.725237	-0.658272	-0.822749	-0.836445	-0.186093	-0.422243	-0.320497	-0.725714	-0.533809	-0.502639	-0.718839	-0.737119	-0.617252	-0.594409	-0.554119
Ifih1	-0.197826	-0.220453	0.00266746	-0.263735	0.139577	0.175801	-0.560972	-0.730262	-0.637109	-0.6451	-0.422812	-0.343657	-0.328078	-0.0879762	0.056923	-0.116745	-0.100644	0.11911	-0.368625	-0.466578	-0.109622	-0.249543	-0.406938	-0.196318	-0.129163	0.0606462	0.130894	0.378361	0.483045	-0.0361397	0.234044	0.184889	0.478306	0.430163	0.653348	0.662492	0.356854	0.548299	0.509968	0.621766	0.436585	0.451609	0.625028	0.686585	0.691249	0.577951	0.596576
Ift20	0.136992	0.204176	-0.0147171	0.313366	-0.162222	-0.158774	0.567985	0.728462	0.702652	0.750577	0.558853	0.424018	0.4611	-0.0340304	-0.20941	-0.00949725	0.00759134	-0.230861	0.301651	0.385091	0.134128	0.296632	0.375151	0.190646	0.137727	-0.104639	-0.176598	-0.378796	-0.534058	-0.000141294	-0.287807	-0.153776	-0.594963	-0.547796	-0.727765	-0.747306	-0.282313	-0.471304	-0.402157	-0.655657	-0.473994	-0.462599	-0.664536	-0.699153	-0.641301	-0.580467	-0.569327
Ift46	-0.129656	-0.178518	0.0547715	-0.25355	0.236096	0.234134	-0.573958	-0.783826	-0.712003	-0.764097	-0.545861	-0.442569	-0.471465	0.0278007	0.173068	-0.0431951	-0.0650961	0.187212	-0.320882	-0.445862	-0.173737	-0.356292	-0.484175	-0.276469	-0.208348	0.0683868	0.105612	0.381174	0.517859	-0.00839745	0.298044	0.1785	0.611701	0.538579	0.773592	0.773462	0.299702	0.555581	0.489601	0.726411	0.517079	0.520361	0.710822	0.767527	0.725842	0.629149	0.627161
Igf2	0.0609957	-0.00259163	0.123668	-0.0841577	0.289926	0.223221	-0.283442	-0.459331	-0.453851	-0.554702	-0.457268	-0.375539	-0.463877	0.211758	0.271616	0.0964725	0.0197081	0.193228	-0.0666281	-0.178949	-0.198196	-0.358956	-0.37635	-0.282421	-0.246649	0.0365208	-0.0113308	0.17783	0.291084	0.0424073	0.247893	0.0750262	0.511391	0.429443	0.568132	0.547763	0.0403522	0.282152	0.205097	0.525148	0.382645	0.366959	0.480166	0.502181	0.406539	0.383812	0.349188
Ighg3	0.0798044	0.210512	0.0494295	0.425227	-0.0270173	0.0132578	0.490656	0.533218	0.652973	0.721994	0.629569	0.406147	0.499249	-0.147308	-0.381535	-0.214008	-0.178927	-0.378024	0.169803	0.154472	0.0663803	0.19137	0.101447	0.00542838	-0.000705468	-0.195455	-0.322811	-0.326442	-0.539681	-0.0472485	-0.279272	-0.0620988	-0.590164	-0.597028	-0.616343	-0.678182	-0.149691	-0.190878	-0.0979635	-0.472855	-0.367741	-0.30812	-0.529945	-0.496537	-0.362235	-0.420034	-0.367758
Igkv3.12	0.0523916	0.0923214	-0.0608197	0.1494	-0.197648	-0.180495	0.368545	0.523455	0.482139	0.534046	0.395096	0.323096	0.359185	-0.0656204	-0.154274	0.00197528	0.0323176	-0.142199	0.184596	0.279355	0.140951	0.276329	0.349961	0.217535	0.17248	-0.0425499	-0.0484263	-0.242139	-0.339928	-0.00545792	-0.216245	-0.112683	-0.444219	-0.384743	-0.544036	-0.537938	-0.167063	-0.362948	-0.309986	-0.510353	-0.365029	-0.363735	-0.489947	-0.526083	-0.481988	-0.424067	-0.415118
Igkv4.57	0.221808	0.204173	-0.0162292	0.183515	-0.15633	-0.217074	0.526354	0.717957	0.561634	0.54536	0.302041	0.280877	0.227474	0.165666	0.065453	0.220518	0.186326	-0.0156709	0.400796	0.524778	0.108482	0.236181	0.462264	0.234606	0.153961	-0.00883815	-0.0550933	-0.356924	-0.412416	0.0622523	-0.190627	-0.20753	-0.382899	-0.322993	-0.590773	-0.582	-0.393664	-0.611387	-0.597129	-0.600915	-0.409515	-0.44878	-0.58714	-0.674512	-0.728369	-0.568266	-0.610122
Igkv8.24	0.0232044	0.134005	-0.0236226	0.305859	-0.14558	-0.0904997	0.435365	0.54015	0.613488	0.701847	0.6004	0.423002	0.52105	-0.187125	-0.361592	-0.17816	-0.121917	-0.324542	0.136557	0.176613	0.129788	0.279984	0.230729	0.128556	0.108868	-0.139682	-0.198883	-0.284883	-0.469808	-0.0487077	-0.28628	-0.0723718	-0.599458	-0.567482	-0.641024	-0.671063	-0.112198	-0.245337	-0.152461	-0.531294	-0.4018	-0.357146	-0.547417	-0.536016	-0.408698	-0.435244	-0.386828
Iglc2	-0.0427379	-0.0029288	-0.160167	0.037418	-0.367078	-0.311467	0.329219	0.566509	0.498141	0.596533	0.451908	0.404445	0.474486	-0.177771	-0.214023	-0.0150438	0.0592949	-0.140392	0.124029	0.285975	0.239941	0.426249	0.51651	0.380211	0.322398	0.00156203	0.0778714	-0.20788	-0.302088	-0.0251515	-0.26545	-0.117845	-0.54206	-0.431495	-0.647048	-0.606643	-0.0964553	-0.416951	-0.345554	-0.632808	-0.449509	-0.453673	-0.563599	-0.616091	-0.547339	-0.472608	-0.453389
Iglv1	-0.00914949	0.102953	-0.041053	0.273306	-0.166929	-0.100595	0.393785	0.501338	0.580108	0.678313	0.591792	0.42011	0.528147	-0.219219	-0.377546	-0.196187	-0.129419	-0.323623	0.0989284	0.143318	0.141188	0.292602	0.231389	0.143438	0.126694	-0.13109	-0.172027	-0.255261	-0.436103	-0.0565631	-0.283199	-0.0596812	-0.593119	-0.555569	-0.62193	-0.646214	-0.0731409	-0.215209	-0.11972	-0.51499	-0.390936	-0.344633	-0.522974	-0.508808	-0.373158	-0.407225	-0.354058
Iglv2	-0.0453855	-0.00179875	-0.149882	0.045678	-0.344763	-0.288142	0.313733	0.534378	0.479518	0.576389	0.443788	0.390679	0.462828	-0.180716	-0.220788	-0.0304345	0.0428638	-0.147735	0.110458	0.259554	0.22703	0.404638	0.479024	0.353652	0.30126	-0.00581362	0.0634596	-0.197882	-0.293854	-0.0279673	-0.256688	-0.107205	-0.525168	-0.422361	-0.618729	-0.583007	-0.0836929	-0.382522	-0.311481	-0.599236	-0.427515	-0.427768	-0.536101	-0.581655	-0.509113	-0.445921	-0.424122
Iglv3	-0.023559	0.0430815	-0.10637	0.133175	-0.274966	-0.21849	0.350854	0.530102	0.520349	0.614293	0.494392	0.399024	0.480331	-0.18391	-0.269113	-0.0825839	-0.0149626	-0.207857	0.116165	0.226816	0.192625	0.359629	0.389906	0.274384	0.233865	-0.0515109	-0.0259139	-0.224621	-0.350447	-0.0354934	-0.264981	-0.0935566	-0.546889	-0.468907	-0.620951	-0.607833	-0.0903158	-0.330398	-0.252102	-0.570555	-0.41498	-0.399578	-0.534717	-0.560064	-0.468486	-0.437291	-0.406103
Igsf9b	-0.192579	-0.0988939	-0.204612	0.0142191	-0.417101	-0.290298	0.208374	0.42244	0.454533	0.617472	0.558421	0.461534	0.614197	-0.389971	-0.420384	-0.211002	-0.0766391	-0.261898	-0.0598596	0.0819747	0.278087	0.479512	0.437484	0.378961	0.350353	-0.0306348	0.0823684	-0.118446	-0.256106	-0.0863568	-0.30124	-0.0393031	-0.623344	-0.509255	-0.637214	-0.598512	0.0978585	-0.215494	-0.106197	-0.581968	-0.431301	-0.399089	-0.505156	-0.513948	-0.354628	-0.36802	-0.302646
Ikbkg	-0.182346	-0.241467	-0.0395473	-0.346767	0.0600259	0.0801603	-0.548841	-0.655529	-0.640491	-0.657509	-0.479654	-0.345576	-0.358107	-0.0368933	0.151561	-0.00997314	-0.000125177	0.207116	-0.317893	-0.361319	-0.0708164	-0.193499	-0.263986	-0.0922495	-0.0485979	0.117189	0.227306	0.370588	0.513045	-0.0130687	0.23779	0.142846	0.493176	0.476096	0.617364	0.652803	0.30577	0.416269	0.364018	0.543171	0.393798	0.38238	0.576693	0.602405	0.566417	0.514548	0.51191
Il1b	-0.268113	-0.195233	-0.273104	-0.126587	-0.513401	-0.368335	0.094703	0.348551	0.347866	0.528463	0.485675	0.44027	0.59977	-0.438185	-0.396739	-0.191287	-0.0349589	-0.19951	-0.132296	0.0506947	0.325849	0.535771	0.513941	0.473052	0.439222	0.0280798	0.212874	-0.0377281	-0.137701	-0.0920329	-0.282546	-0.0283279	-0.580476	-0.435181	-0.589162	-0.51965	0.173059	-0.205641	-0.100322	-0.568765	-0.415595	-0.395563	-0.45313	-0.475593	-0.321764	-0.318718	-0.254655
Il1rap	-0.0610524	-0.107064	0.0866072	-0.170761	0.265755	0.243612	-0.45891	-0.664057	-0.602576	-0.669354	-0.49086	-0.408281	-0.45252	0.083612	0.186425	-0.012604	-0.0525945	0.168176	-0.231976	-0.360225	-0.186267	-0.36029	-0.462384	-0.292733	-0.233215	0.0444126	0.0423969	0.30096	0.418854	0.00563023	0.27267	0.145417	0.559174	0.478449	0.689453	0.676923	0.209492	0.470376	0.404557	0.653097	0.465522	0.467025	0.621377	0.671282	0.618948	0.539132	0.529546
Il1rn	-0.0338616	-0.238324	-0.13612	-0.577954	-0.145593	-0.221752	-0.427277	-0.329665	-0.616755	-0.704133	-0.718452	-0.387236	-0.539596	0.259343	0.573277	0.44233	0.392996	0.551493	-0.0397265	0.094359	0.0205463	-0.0596735	0.220155	0.22166	0.174814	0.307732	0.512087	0.284493	0.568529	0.0974204	0.271387	-0.0371747	0.588923	0.662843	0.498316	0.613582	0.0196289	-0.11846	-0.2376	0.269176	0.250298	0.135133	0.388187	0.276738	0.0581013	0.250238	0.152767
Il27	0.241005	0.254	0.0330591	0.288477	-0.0771631	-0.134394	0.568281	0.710671	0.612899	0.596811	0.371607	0.296749	0.258736	0.15072	-0.00404521	0.148439	0.110712	-0.0949708	0.400273	0.478156	0.0705371	0.187579	0.355035	0.141758	0.0763387	-0.065514	-0.16227	-0.386787	-0.481077	0.0501659	-0.20437	-0.188379	-0.417122	-0.386183	-0.5981	-0.6164	-0.393555	-0.542487	-0.51717	-0.568916	-0.397074	-0.415795	-0.587233	-0.648606	-0.674786	-0.556781	-0.585034
Imp4	0.226961	0.220872	-0.0308667	0.216685	-0.200831	-0.254628	0.602454	0.826359	0.666185	0.664145	0.394354	0.354493	0.312855	0.14172	0.0215789	0.211349	0.18641	-0.0532899	0.433189	0.576455	0.140575	0.298498	0.534119	0.281027	0.191989	-0.0203554	-0.0669639	-0.406512	-0.485895	0.0581959	-0.239833	-0.228535	-0.484402	-0.411682	-0.7098	-0.700129	-0.421757	-0.681216	-0.653519	-0.710216	-0.488633	-0.525735	-0.692061	-0.785086	-0.824906	-0.656544	-0.69422
Impact	-0.29718	-0.327378	-0.103966	-0.400184	-0.0386747	0.0343202	-0.61866	-0.70068	-0.645236	-0.608799	-0.392036	-0.275538	-0.23062	-0.193804	0.0165904	-0.118661	-0.0592241	0.141255	-0.433411	-0.458082	-0.00790355	-0.0990609	-0.229915	-0.022448	0.0301976	0.117124	0.279152	0.425058	0.544018	-0.0529288	0.194274	0.17893	0.401047	0.407714	0.568162	0.616623	0.431157	0.490706	0.466824	0.5083	0.360661	0.366001	0.56584	0.606854	0.62891	0.539339	0.565037
Impdh1	0.215937	0.243394	0.0332182	0.299565	-0.0720888	-0.11577	0.549411	0.678338	0.608776	0.604178	0.398865	0.306982	0.28635	0.109748	-0.0518316	0.100796	0.0733217	-0.128756	0.364629	0.430646	0.0703163	0.187271	0.320347	0.124871	0.0676561	-0.0800904	-0.178045	-0.372904	-0.480524	0.0369949	-0.211269	-0.169851	-0.433678	-0.40721	-0.592688	-0.615658	-0.356206	-0.491175	-0.457568	-0.54998	-0.388542	-0.397296	-0.572172	-0.621031	-0.626481	-0.531939	-0.549588
Inpp4a	-0.16355	-0.206776	0.011239	-0.279891	0.153218	0.169137	-0.554948	-0.720084	-0.659115	-0.687129	-0.48226	-0.378828	-0.389221	-0.0260559	0.1295	-0.0552417	-0.0562721	0.16982	-0.33001	-0.421717	-0.12248	-0.272489	-0.391039	-0.195632	-0.135761	0.0791203	0.146711	0.37205	0.498866	-0.017987	0.257359	0.167741	0.52906	0.480559	0.68187	0.694747	0.314557	0.505768	0.452971	0.632288	0.450322	0.452881	0.636692	0.685186	0.659683	0.572177	0.576244
Inpp5f	0.0425594	-0.00256182	0.152583	-0.0522191	0.353669	0.296532	-0.330617	-0.558427	-0.50122	-0.600201	-0.461014	-0.40497	-0.478418	0.182897	0.226842	0.0294933	-0.0449705	0.153515	-0.119393	-0.272932	-0.233328	-0.416996	-0.495292	-0.363663	-0.309107	0.00747728	-0.0615282	0.209004	0.309128	0.0279718	0.266253	0.112589	0.544775	0.439236	0.643205	0.607137	0.0918751	0.399703	0.326439	0.622435	0.444019	0.44439	0.55833	0.605723	0.531578	0.465375	0.443367
Inpp5k	-0.177788	-0.160735	0.0861928	-0.130281	0.289772	0.328697	-0.557326	-0.825242	-0.63743	-0.653282	-0.3814	-0.371374	-0.338281	-0.100425	-0.0231414	-0.225636	-0.219539	0.0226273	-0.399383	-0.581665	-0.188965	-0.366474	-0.623888	-0.370335	-0.273072	-0.0176203	-0.022071	0.372518	0.434548	-0.0535437	0.247922	0.231819	0.49781	0.396729	0.729371	0.696938	0.384214	0.710154	0.680031	0.751478	0.51365	0.559366	0.703371	0.809803	0.849145	0.663238	0.700946
Ints10	0.134781	0.20812	-0.00517846	0.328094	-0.143539	-0.137847	0.56216	0.708569	0.697681	0.746084	0.564018	0.419752	0.461097	-0.0411523	-0.224064	-0.0286182	-0.0112804	-0.24521	0.291161	0.362854	0.124315	0.281562	0.343336	0.16739	0.119383	-0.114933	-0.19505	-0.375107	-0.536152	-0.00400968	-0.285462	-0.144851	-0.591483	-0.551228	-0.713909	-0.738697	-0.272079	-0.442707	-0.371862	-0.634232	-0.461137	-0.444908	-0.649414	-0.676943	-0.612536	-0.563665	-0.548907
Ints7	0.019249	0.0310842	-0.116865	0.0355748	-0.285689	-0.266296	0.313115	0.518116	0.423091	0.480153	0.329407	0.310458	0.337088	-0.0675094	-0.0975096	0.0620825	0.101191	-0.067877	0.169313	0.311221	0.184261	0.332003	0.456682	0.315762	0.257062	0.0150713	0.0659949	-0.202412	-0.262438	0.00224047	-0.204264	-0.12622	-0.413894	-0.323428	-0.534445	-0.499714	-0.150492	-0.418567	-0.37426	-0.539176	-0.376069	-0.393552	-0.484043	-0.544073	-0.521845	-0.426699	-0.428338
Irf2bp1	0.391443	0.430792	0.197751	0.533761	0.189604	0.0838741	0.69383	0.705595	0.681782	0.607734	0.387402	0.232639	0.162875	0.287059	0.0115453	0.121107	0.0237692	-0.16966	0.504181	0.467735	-0.0765581	-0.0218027	0.0896494	-0.123135	-0.165336	-0.17113	-0.417377	-0.482502	-0.620244	0.0681025	-0.170882	-0.180503	-0.357023	-0.41014	-0.523176	-0.607146	-0.509587	-0.460573	-0.446804	-0.4356	-0.313384	-0.309916	-0.541469	-0.566039	-0.601581	-0.529919	-0.561671
Irgc1	0.190104	0.300183	0.110381	0.494797	0.0606458	0.0539766	0.580944	0.604453	0.691475	0.714673	0.580551	0.362875	0.407299	-0.00933707	-0.275043	-0.122666	-0.131563	-0.335151	0.286258	0.254101	0.0128051	0.115704	0.0786627	-0.0561868	-0.071465	-0.204338	-0.385261	-0.393891	-0.595793	-0.0124827	-0.253739	-0.0995509	-0.535889	-0.564272	-0.604144	-0.680613	-0.274188	-0.272466	-0.201132	-0.467315	-0.357469	-0.310767	-0.548823	-0.528581	-0.441634	-0.466328	-0.4379
Irx2	0.0828561	0.00915072	0.141993	-0.0850683	0.325757	0.245679	-0.295895	-0.488109	-0.489778	-0.60668	-0.508022	-0.415942	-0.520327	0.252636	0.315116	0.122344	0.0320896	0.220277	-0.0541543	-0.177009	-0.22238	-0.400254	-0.408375	-0.312921	-0.276095	0.040736	-0.0175809	0.184097	0.310712	0.052101	0.274226	0.074908	0.566215	0.474932	0.620179	0.596876	0.0243283	0.291149	0.203478	0.570709	0.417284	0.397321	0.51931	0.540083	0.427438	0.409707	0.367723
Isg20	0.285023	0.436537	0.263714	0.719591	0.323942	0.29185	0.637042	0.511078	0.708788	0.692278	0.602474	0.294038	0.332132	0.0593626	-0.317754	-0.216346	-0.266495	-0.439827	0.313386	0.15356	-0.131215	-0.0953701	-0.238461	-0.336482	-0.315377	-0.31706	-0.633785	-0.440505	-0.692945	-0.0149556	-0.216215	-0.0566113	-0.47008	-0.585359	-0.4852	-0.628015	-0.311169	-0.0953705	-0.0266894	-0.278961	-0.240495	-0.159507	-0.446506	-0.372137	-0.267167	-0.372163	-0.332263
Ispd	-0.218321	-0.333416	-0.15343	-0.542538	-0.138297	-0.120696	-0.580758	-0.560587	-0.671473	-0.678703	-0.558456	-0.325284	-0.361773	-0.02232	0.26594	0.135129	0.158941	0.346325	-0.292509	-0.225126	0.0320521	-0.0462625	0.013594	0.136336	0.141834	0.227721	0.44334	0.39668	0.603184	0.00951954	0.230789	0.0870831	0.491077	0.544077	0.54576	0.638627	0.284359	0.220115	0.154365	0.396075	0.309867	0.256829	0.500058	0.46698	0.382904	0.425636	0.39737
Itfg2	0.01851	-0.145581	0.0241651	-0.3993	0.159556	0.0667415	-0.493011	-0.589667	-0.737199	-0.865977	-0.783129	-0.531795	-0.684831	0.305854	0.534122	0.312535	0.225224	0.463312	-0.0964619	-0.118266	-0.153194	-0.333535	-0.20324	-0.115198	-0.108421	0.201332	0.279286	0.319858	0.571965	0.085097	0.360103	0.0502647	0.75854	0.730893	0.764363	0.811831	0.0638057	0.192131	0.0631466	0.602652	0.467842	0.393093	0.632202	0.592274	0.396449	0.477007	0.397065
Itgae	-0.103696	-0.261993	-0.101083	-0.527564	-0.0568821	-0.0975918	-0.530406	-0.522344	-0.697005	-0.762807	-0.687486	-0.413999	-0.518539	0.152788	0.439769	0.27795	0.249222	0.449462	-0.173131	-0.111202	-0.0248084	-0.136267	0.00797696	0.0904076	0.0817796	0.249659	0.428398	0.355242	0.603553	0.0567752	0.287714	0.0441588	0.613148	0.649914	0.614418	0.703142	0.154139	0.123951	0.022466	0.434113	0.349689	0.271125	0.523675	0.465539	0.308064	0.405223	0.341397
Itgb4	-0.100601	-0.209074	-0.0314362	-0.387452	0.0646582	0.0381503	-0.510861	-0.58826	-0.660259	-0.719971	-0.596732	-0.404	-0.476602	0.104876	0.318873	0.144441	0.117149	0.325614	-0.212466	-0.227024	-0.0840874	-0.2179	-0.183127	-0.059782	-0.0390038	0.165071	0.275693	0.340457	0.532333	0.0307074	0.276811	0.0908442	0.580884	0.571911	0.641106	0.689637	0.193204	0.277479	0.194076	0.521896	0.394613	0.351187	0.564321	0.552816	0.445836	0.465038	0.427108
Itih2	-0.298418	-0.419152	-0.193395	-0.645494	-0.177658	-0.137257	-0.716492	-0.698443	-0.801745	-0.792305	-0.627567	-0.36651	-0.386667	-0.0849423	0.256198	0.105466	0.150176	0.374368	-0.394705	-0.320382	0.0488748	-0.0387462	-0.00423148	0.161332	0.175656	0.259489	0.523804	0.491326	0.722471	-0.00562722	0.261391	0.123809	0.554846	0.618561	0.643963	0.753025	0.388035	0.313424	0.246536	0.478876	0.368859	0.316326	0.603665	0.576525	0.502474	0.528875	0.508272
Itih5	-0.31019	-0.404457	-0.166617	-0.586329	-0.128373	-0.0755778	-0.719074	-0.740789	-0.790259	-0.772621	-0.579183	-0.357715	-0.35674	-0.124305	0.185492	0.0298646	0.0803754	0.309731	-0.428275	-0.389406	0.025956	-0.0703856	-0.0955146	0.0949866	0.124825	0.219668	0.457316	0.493043	0.695829	-0.022375	0.253868	0.151311	0.534392	0.578253	0.657461	0.74874	0.422363	0.398906	0.343154	0.522676	0.390774	0.356813	0.627421	0.624595	0.580491	0.564938	0.559692
Itm2a	0.0925897	0.0335875	0.146611	-0.0365674	0.320124	0.244537	-0.236979	-0.422324	-0.411721	-0.520496	-0.43404	-0.36723	-0.461122	0.236074	0.271763	0.0994334	0.0133119	0.177309	-0.0326793	-0.155829	-0.213232	-0.375604	-0.392226	-0.309259	-0.273795	0.0188958	-0.0534579	0.144925	0.247004	0.0469952	0.240807	0.066395	0.495785	0.404586	0.545308	0.515354	0.00527223	0.264827	0.187955	0.511872	0.372018	0.358499	0.454522	0.478341	0.380778	0.357738	0.321487
Jade2	0.0228443	-0.118006	0.0108051	-0.33677	0.110212	0.0303751	-0.38645	-0.448264	-0.586969	-0.693629	-0.640481	-0.425964	-0.556924	0.261967	0.453805	0.279716	0.206881	0.393286	-0.0595825	-0.0637113	-0.114233	-0.25441	-0.126446	-0.0676363	-0.0685633	0.174526	0.244792	0.250413	0.46139	0.0750056	0.288921	0.0279481	0.610394	0.595458	0.600504	0.644481	0.033163	0.116445	0.00928659	0.460519	0.362369	0.295574	0.490856	0.449411	0.281204	0.362296	0.29227
Jagn1	0.246614	0.25893	0.0137876	0.290119	-0.123868	-0.179851	0.618049	0.794982	0.677643	0.668963	0.417558	0.343141	0.306742	0.145677	-0.0115932	0.165625	0.132769	-0.0994256	0.430869	0.533263	0.0999731	0.240136	0.432508	0.194896	0.119023	-0.0600396	-0.147568	-0.419101	-0.520113	0.0524219	-0.234795	-0.210643	-0.478302	-0.432127	-0.681274	-0.692983	-0.421439	-0.615199	-0.584312	-0.655423	-0.456601	-0.479743	-0.66397	-0.736789	-0.762742	-0.626127	-0.656262
Josd2	0.0775783	0.125709	-0.0632705	0.196379	-0.223969	-0.208361	0.460046	0.642212	0.592394	0.650027	0.478037	0.387721	0.426902	-0.0646248	-0.179489	0.00797227	0.0394234	-0.172882	0.237173	0.346902	0.162035	0.322837	0.414148	0.250141	0.195524	-0.0565164	-0.0733188	-0.303356	-0.423256	-0.00343232	-0.260109	-0.13959	-0.534531	-0.466928	-0.658525	-0.654693	-0.216879	-0.444601	-0.382135	-0.61575	-0.440407	-0.438912	-0.596055	-0.639581	-0.589695	-0.51857	-0.50954
K230010J24Rik	-0.169661	-0.254633	-0.027171	-0.398411	0.0988545	0.100663	-0.619291	-0.747091	-0.753861	-0.795257	-0.605507	-0.434282	-0.474144	0.0219939	0.241019	0.0419999	0.0340755	0.279545	-0.325094	-0.377004	-0.102799	-0.257392	-0.307405	-0.123013	-0.0777124	0.14486	0.259713	0.415428	0.596761	0.00241462	0.297339	0.14982	0.618229	0.592735	0.742416	0.782359	0.307016	0.447119	0.373112	0.644486	0.471898	0.448972	0.678465	0.69877	0.629547	0.589899	0.573544
Kat2b	-0.223982	-0.232404	0.00194985	-0.254552	0.143484	0.193526	-0.581569	-0.763902	-0.642882	-0.639145	-0.396634	-0.333833	-0.300755	-0.129659	0.00940149	-0.164249	-0.137593	0.0861315	-0.405405	-0.514754	-0.109279	-0.249239	-0.440869	-0.212106	-0.136773	0.0468297	0.116828	0.393462	0.485327	-0.0494165	0.227479	0.203662	0.462486	0.410245	0.659667	0.664535	0.395372	0.600043	0.569946	0.641166	0.44552	0.470375	0.641048	0.714987	0.74034	0.60371	0.632943
Kat6b	-0.140164	-0.15534	0.0594063	-0.177343	0.229162	0.246413	-0.508201	-0.718645	-0.604888	-0.634292	-0.415725	-0.362851	-0.36072	-0.0344317	0.0679307	-0.118399	-0.124415	0.0963548	-0.323483	-0.458069	-0.158955	-0.318604	-0.488794	-0.282984	-0.209745	0.0254049	0.0433873	0.338809	0.428976	-0.0277579	0.243599	0.182849	0.495281	0.419344	0.670345	0.65735	0.307451	0.562923	0.519988	0.657498	0.458886	0.480053	0.631042	0.702865	0.701492	0.576735	0.592514
Kbtbd7	-0.181582	-0.0584678	-0.100803	0.1145	-0.208159	-0.0848539	0.119081	0.190827	0.329487	0.469052	0.495602	0.346942	0.506263	-0.380331	-0.458018	-0.319638	-0.20513	-0.321923	-0.135275	-0.105286	0.157873	0.284517	0.122737	0.14139	0.155078	-0.100033	-0.06406	-0.0636199	-0.218965	-0.101446	-0.229463	0.036856	-0.485053	-0.441587	-0.416481	-0.422531	0.1649	0.0422469	0.145278	-0.315288	-0.256418	-0.193586	-0.297376	-0.25123	-0.0697082	-0.171405	-0.0897214
Kcnj2	0.000572148	0.082637	-0.0644137	0.203269	-0.204705	-0.15263	0.373892	0.512616	0.5381	0.624197	0.51646	0.390284	0.473821	-0.173316	-0.293897	-0.11746	-0.0589465	-0.247505	0.122881	0.1978	0.155559	0.307267	0.303463	0.197794	0.167788	-0.0873158	-0.100739	-0.242276	-0.387545	-0.0386373	-0.261573	-0.0812844	-0.543511	-0.489364	-0.601441	-0.607843	-0.0990469	-0.281283	-0.200816	-0.527997	-0.390461	-0.363535	-0.516743	-0.525529	-0.423984	-0.418089	-0.381544
Kcnk10	-0.00703289	-0.117271	0.0497184	-0.284259	0.194951	0.132195	-0.445196	-0.578292	-0.639	-0.738772	-0.626772	-0.454691	-0.559577	0.209962	0.374885	0.174571	0.108251	0.325009	-0.135981	-0.197885	-0.159315	-0.327447	-0.290753	-0.179068	-0.153109	0.12885	0.168753	0.289592	0.475849	0.0515102	0.306246	0.0814389	0.639335	0.592014	0.68995	0.710902	0.108758	0.282031	0.183801	0.585461	0.43902	0.397168	0.58858	0.584587	0.452799	0.469151	0.419595
Kcnk6	0.296425	0.37891	0.135281	0.537738	0.0735496	0.0228671	0.711589	0.766792	0.787271	0.775105	0.568208	0.369212	0.365562	0.119599	-0.165805	8.63e-05	-0.044339	-0.280559	0.430661	0.420509	0.00342652	0.113389	0.167934	-0.0340262	-0.0731267	-0.193284	-0.402891	-0.486467	-0.675821	0.0258705	-0.259804	-0.1642	-0.54374	-0.568869	-0.682572	-0.759233	-0.423136	-0.446455	-0.392082	-0.56507	-0.416333	-0.391642	-0.651364	-0.662411	-0.626726	-0.589484	-0.588994
Kdelr2	0.240813	0.272601	0.0523465	0.339023	-0.0463994	-0.0968666	0.586056	0.706178	0.642205	0.631435	0.418278	0.313488	0.288944	0.128202	-0.0534376	0.101128	0.0662957	-0.143055	0.39065	0.446949	0.0575196	0.172795	0.304801	0.101386	0.0443935	-0.0951997	-0.213449	-0.398881	-0.516083	0.0402181	-0.216886	-0.175881	-0.44619	-0.42772	-0.609943	-0.641059	-0.38313	-0.502307	-0.468317	-0.558828	-0.396028	-0.402551	-0.591467	-0.638189	-0.644421	-0.551323	-0.56987
Kdelr3	0.267452	0.352373	0.112378	0.510924	0.0369403	-0.00188663	0.692525	0.762297	0.782901	0.783552	0.581634	0.386009	0.393659	0.0849532	-0.187963	-0.0141562	-0.0462968	-0.285141	0.40573	0.407752	0.025011	0.145128	0.195241	-0.00185225	-0.0415877	-0.185139	-0.375171	-0.471604	-0.661442	0.0184244	-0.269798	-0.159788	-0.563999	-0.578713	-0.697886	-0.767392	-0.395698	-0.442998	-0.383242	-0.582693	-0.429256	-0.403778	-0.658398	-0.670165	-0.624823	-0.589411	-0.584337
Kdm4c	-0.136623	-0.209377	0.00944696	-0.327966	0.153934	0.148336	-0.573363	-0.727701	-0.711722	-0.761428	-0.573127	-0.429504	-0.470711	0.0411362	0.224312	0.0235068	0.00537789	0.245139	-0.298731	-0.376131	-0.130766	-0.293044	-0.361229	-0.179516	-0.128999	0.113259	0.191255	0.38242	0.544499	0.00315137	0.291846	0.150198	0.604238	0.560512	0.732058	0.755245	0.279106	0.459939	0.388126	0.653531	0.47428	0.459309	0.666435	0.696822	0.632963	0.579365	0.565319
Kdm5c	0.087724	0.221638	0.0349659	0.439871	-0.0668928	-0.0246715	0.54828	0.621327	0.727835	0.804905	0.687164	0.457447	0.554381	-0.155065	-0.39867	-0.205209	-0.16524	-0.392864	0.20169	0.206601	0.0930053	0.241233	0.170136	0.0502983	0.0350388	-0.196736	-0.320449	-0.364155	-0.589428	-0.0465118	-0.313323	-0.0831309	-0.659473	-0.653753	-0.705409	-0.763607	-0.178726	-0.258928	-0.158641	-0.560489	-0.429271	-0.371703	-0.611164	-0.586565	-0.448362	-0.491863	-0.439781
Kiz	-0.106995	-0.128056	0.0723392	-0.156291	0.243022	0.247151	-0.469467	-0.676973	-0.57716	-0.61783	-0.417717	-0.363437	-0.374755	0.00375702	0.0961026	-0.0883409	-0.10576	0.107002	-0.282368	-0.41589	-0.167132	-0.327345	-0.476464	-0.28784	-0.219763	0.0238685	0.0284902	0.311112	0.402577	-0.0172991	0.243145	0.166613	0.495167	0.416717	0.652788	0.637085	0.264712	0.521618	0.473974	0.637448	0.446878	0.46336	0.606247	0.671576	0.656863	0.546022	0.554577
Klf8	0.0983241	0.178199	-0.00429111	0.307051	-0.124456	-0.106632	0.49004	0.609388	0.626214	0.680655	0.534981	0.388571	0.44222	-0.0755307	-0.247284	-0.0707258	-0.0455042	-0.253329	0.229513	0.282918	0.111837	0.253657	0.276998	0.134878	0.0992832	-0.117654	-0.191341	-0.325786	-0.483817	-0.0159924	-0.264213	-0.113348	-0.549598	-0.517579	-0.63945	-0.666322	-0.210694	-0.351344	-0.279585	-0.55469	-0.40825	-0.384181	-0.572171	-0.585197	-0.507539	-0.485561	-0.462259
Klhdc4	-0.0215676	-0.0298547	-0.181096	-0.0667949	-0.393408	-0.364533	0.278736	0.544294	0.400862	0.472624	0.305719	0.329342	0.356362	-0.0922269	-0.0709434	0.105739	0.160974	-0.0159446	0.154339	0.349168	0.241979	0.414415	0.584922	0.431014	0.35746	0.0660229	0.175772	-0.175721	-0.209973	0.00439581	-0.213213	-0.14251	-0.427249	-0.300858	-0.569128	-0.505654	-0.131935	-0.48718	-0.443961	-0.605785	-0.415709	-0.448712	-0.513919	-0.597033	-0.585399	-0.455798	-0.463402
Klhdc7a	-0.0891471	-0.159143	0.0425156	-0.267248	0.19902	0.178161	-0.513135	-0.681296	-0.662714	-0.726691	-0.554465	-0.426763	-0.479745	0.0840453	0.236879	0.0366452	0.00294729	0.232507	-0.248771	-0.34093	-0.154554	-0.321912	-0.384036	-0.218112	-0.168634	0.0924962	0.136869	0.339268	0.490459	0.012137	0.287907	0.137083	0.595145	0.538184	0.710882	0.721539	0.226882	0.433817	0.359558	0.642305	0.465638	0.451745	0.638369	0.669636	0.598232	0.547445	0.528934
Klhdc8a	0.327181	0.415533	0.239571	0.598103	0.288438	0.217214	0.599575	0.516703	0.610391	0.556815	0.426166	0.207788	0.186202	0.182712	-0.126918	-0.0482255	-0.1265	-0.279528	0.375048	0.261475	-0.126893	-0.104538	-0.133	-0.2651	-0.267943	-0.235706	-0.514571	-0.418072	-0.595793	0.0271787	-0.156268	-0.0987692	-0.336902	-0.430622	-0.41003	-0.523834	-0.37955	-0.214943	-0.182735	-0.26947	-0.214066	-0.172186	-0.408838	-0.377886	-0.350521	-0.377067	-0.374392
Klhl5	-0.256467	-0.399433	-0.198122	-0.659552	-0.197688	-0.178259	-0.670228	-0.621725	-0.773993	-0.78048	-0.654715	-0.3681	-0.414845	-0.0220362	0.327572	0.184089	0.213951	0.424238	-0.328947	-0.22967	0.0571256	-0.0236046	0.0712757	0.201637	0.200215	0.282621	0.55021	0.45863	0.707722	0.0155702	0.262634	0.0882254	0.561409	0.636029	0.6098	0.727494	0.320392	0.211954	0.133957	0.423406	0.337537	0.268459	0.556396	0.50669	0.400676	0.468704	0.431127
Klrb1b	0.062563	0.120164	-0.0385182	0.208235	-0.165395	-0.145051	0.40259	0.538092	0.526065	0.58072	0.446618	0.34404	0.390205	-0.0779618	-0.197678	-0.0367008	-0.00637008	-0.189234	0.18939	0.264076	0.127397	0.26265	0.307845	0.178534	0.139825	-0.0733451	-0.104753	-0.26558	-0.387282	-0.0124629	-0.231824	-0.106385	-0.479355	-0.432324	-0.568311	-0.575775	-0.171292	-0.339533	-0.278532	-0.512904	-0.372362	-0.360179	-0.507973	-0.531789	-0.470978	-0.433213	-0.416514
Krt23	0.00339792	0.00580645	0.212605	0.0367857	0.48004	0.44772	-0.403217	-0.735412	-0.561541	-0.65	-0.427493	-0.438929	-0.473145	0.10663	0.104687	-0.127746	-0.19298	0.0454064	-0.224737	-0.464079	-0.299532	-0.522006	-0.735265	-0.529113	-0.435389	-0.0645081	-0.182574	0.257248	0.316341	-0.00676906	0.28592	0.188842	0.575057	0.42114	0.760771	0.689001	0.196291	0.636696	0.578156	0.795387	0.5485	0.58661	0.689261	0.79218	0.77348	0.611569	0.620257
Krtap12.1	0.0434333	0.187343	0.0560875	0.422139	0.000449213	0.0553838	0.42733	0.436744	0.595242	0.672634	0.619568	0.383385	0.493721	-0.190122	-0.422829	-0.272141	-0.227839	-0.40351	0.106185	0.0661972	0.0508793	0.161048	0.0213303	-0.0385789	-0.0298395	-0.208426	-0.336439	-0.283017	-0.501745	-0.0626912	-0.264087	-0.0272695	-0.561862	-0.58057	-0.550441	-0.618555	-0.0858994	-0.0889283	0.00829856	-0.394245	-0.317597	-0.246019	-0.458182	-0.405647	-0.250935	-0.343547	-0.279348
Krtap5.2	-0.0189732	0.0316767	-0.11228	0.0961075	-0.279876	-0.231852	0.325953	0.511022	0.478563	0.563326	0.439728	0.368504	0.435779	-0.156522	-0.221191	-0.045009	0.0162777	-0.165541	0.120738	0.239963	0.190713	0.35057	0.404316	0.286417	0.241946	-0.0299794	0.00688904	-0.208508	-0.313225	-0.0262875	-0.243895	-0.098622	-0.501201	-0.41927	-0.584458	-0.563991	-0.0968414	-0.34414	-0.275766	-0.550937	-0.396399	-0.390089	-0.508101	-0.542294	-0.469423	-0.422317	-0.399644
Krtap9.3	-0.0145246	0.0595728	-0.116021	0.160512	-0.307547	-0.247948	0.414467	0.619361	0.603711	0.706662	0.563428	0.454725	0.542621	-0.195778	-0.297085	-0.0838251	-0.0109619	-0.233778	0.147441	0.273496	0.21618	0.406212	0.447862	0.310047	0.262124	-0.0598233	-0.0360308	-0.266438	-0.409749	-0.0367431	-0.30231	-0.112386	-0.623688	-0.53601	-0.714222	-0.700526	-0.118578	-0.391016	-0.303394	-0.657312	-0.477244	-0.461205	-0.618515	-0.649528	-0.549766	-0.509528	-0.476493
Krtcap2	0.0806634	0.192288	-0.0374047	0.366035	-0.211668	-0.16807	0.60672	0.778672	0.808848	0.900914	0.723683	0.532694	0.623302	-0.158352	-0.366768	-0.125618	-0.0727261	-0.346189	0.25423	0.337368	0.175711	0.374637	0.389052	0.2157	0.170776	-0.146172	-0.215319	-0.399929	-0.610369	-0.0349686	-0.360208	-0.13628	-0.749175	-0.694238	-0.853108	-0.879512	-0.22573	-0.438393	-0.335014	-0.741988	-0.547582	-0.512267	-0.751149	-0.765546	-0.644974	-0.62559	-0.585812
Lama1	0.132326	0.13093	-0.0805348	0.12391	-0.260907	-0.281534	0.480891	0.711208	0.568841	0.595678	0.370538	0.34597	0.334116	0.0469986	-0.0272	0.156157	0.162013	-0.0527686	0.322243	0.47671	0.172731	0.333707	0.532277	0.321643	0.241792	0.00325892	0.00883485	-0.319941	-0.388341	0.0347403	-0.230857	-0.190466	-0.466115	-0.377971	-0.65304	-0.627274	-0.30665	-0.589983	-0.554348	-0.660519	-0.455748	-0.48738	-0.619435	-0.703488	-0.718038	-0.573154	-0.596462
Lama5	-0.271532	-0.32365	-0.14958	-0.435616	-0.142268	-0.0798109	-0.531136	-0.530734	-0.548048	-0.50923	-0.358069	-0.21155	-0.183097	-0.162871	0.0640977	-0.0294583	0.0302226	0.184536	-0.351753	-0.3129	0.0515662	0.00182429	-0.0420526	0.10573	0.129789	0.154218	0.346388	0.367546	0.497379	-0.0345543	0.15338	0.120763	0.322921	0.36666	0.427246	0.498064	0.352652	0.306912	0.282146	0.339487	0.250978	0.234794	0.425352	0.429485	0.426542	0.399568	0.409307
Lamb3	0.0524455	0.0478282	0.217959	0.0704708	0.468023	0.419283	-0.3138	-0.619148	-0.475531	-0.573618	-0.393898	-0.405423	-0.455725	0.153194	0.133778	-0.0783342	-0.155373	0.0529855	-0.147844	-0.36997	-0.290707	-0.497635	-0.667275	-0.501028	-0.421104	-0.0649973	-0.196317	0.195685	0.249987	0.00827864	0.262689	0.151906	0.529125	0.381669	0.676821	0.605069	0.119182	0.531942	0.471639	0.707374	0.489912	0.519453	0.600644	0.687726	0.652605	0.520918	0.519202
Lancl3	0.135098	0.270401	0.0888293	0.499611	0.0265332	0.0496124	0.563196	0.588874	0.713705	0.766721	0.655877	0.411722	0.492189	-0.0992541	-0.370814	-0.201861	-0.184536	-0.396413	0.22789	0.194393	0.0384843	0.158004	0.073082	-0.0411435	-0.0481085	-0.221672	-0.389482	-0.378285	-0.606057	-0.0374959	-0.285532	-0.0769489	-0.604406	-0.62721	-0.643875	-0.721073	-0.210281	-0.220008	-0.12915	-0.487265	-0.379165	-0.317486	-0.564758	-0.529511	-0.402476	-0.458418	-0.410651
Larp1	0.158461	0.10735	-0.117495	0.0186659	-0.325524	-0.372465	0.46939	0.756475	0.52159	0.527191	0.258152	0.306616	0.252093	0.130349	0.112964	0.293478	0.283746	0.0708602	0.377873	0.585735	0.198572	0.364021	0.664715	0.416462	0.312088	0.0735818	0.120805	-0.313104	-0.32563	0.0667585	-0.201997	-0.233629	-0.398093	-0.281474	-0.640463	-0.585789	-0.365377	-0.720406	-0.709081	-0.702664	-0.469205	-0.533884	-0.630529	-0.755117	-0.827868	-0.611884	-0.664127
Lck	0.150434	0.221529	0.0336415	0.343563	-0.0629314	-0.0681943	0.517588	0.613927	0.623667	0.653283	0.497223	0.351724	0.381695	-0.00733851	-0.195217	-0.0348181	-0.0327508	-0.233511	0.275154	0.310272	0.0742552	0.196862	0.235167	0.0832723	0.0474224	-0.125709	-0.230241	-0.348036	-0.499441	-0.000321017	-0.241534	-0.123032	-0.502784	-0.487504	-0.604409	-0.641568	-0.261206	-0.363023	-0.303339	-0.520441	-0.381858	-0.361833	-0.554236	-0.568772	-0.513267	-0.483157	-0.470316
Lctl	-0.0599068	0.0940104	-0.0158398	0.331124	-0.108844	-0.0124489	0.344046	0.390586	0.558755	0.678671	0.653179	0.426647	0.576812	-0.310967	-0.500886	-0.331221	-0.245509	-0.421121	0.0074254	-0.000180247	0.114977	0.252275	0.0858041	0.0522689	0.0630821	-0.183862	-0.248141	-0.220286	-0.43982	-0.090195	-0.288987	-0.00305408	-0.612759	-0.601315	-0.575042	-0.621339	0.0207121	-0.0481896	0.066446	-0.424279	-0.341441	-0.264722	-0.455628	-0.400548	-0.210828	-0.318139	-0.236595
Leo1	0.0938336	0.0631623	-0.148808	-7.42e-05	-0.372759	-0.388566	0.432816	0.727827	0.52369	0.560266	0.316464	0.348375	0.329045	0.0374256	0.0264241	0.221471	0.240073	0.023303	0.310073	0.522971	0.23016	0.412268	0.6705	0.445163	0.348001	0.0667728	0.138073	-0.284354	-0.31499	0.0421129	-0.22837	-0.209984	-0.454591	-0.327848	-0.66843	-0.609489	-0.291935	-0.667684	-0.638659	-0.717607	-0.485932	-0.538365	-0.635458	-0.747879	-0.783618	-0.594854	-0.628982
Letmd1	-0.116277	-0.112869	0.0739889	-0.102867	0.235057	0.25381	-0.422385	-0.628888	-0.499076	-0.522458	-0.322199	-0.304121	-0.292311	-0.0433948	0.0186889	-0.143272	-0.14839	0.0410277	-0.285311	-0.424651	-0.154683	-0.297376	-0.476948	-0.289764	-0.218189	-0.00659399	-0.0145297	0.280934	0.338666	-0.0317054	0.202744	0.169686	0.408905	0.329293	0.57601	0.551554	0.271568	0.526028	0.495443	0.585277	0.403148	0.432529	0.547025	0.623055	0.638055	0.507114	0.528755
Lgmn	0.147286	0.192264	-0.0219401	0.266104	-0.169135	-0.178533	0.541153	0.711233	0.652462	0.687035	0.487084	0.384873	0.401588	0.00704663	-0.142024	0.0452373	0.0526771	-0.172939	0.313901	0.410006	0.131824	0.28562	0.399186	0.208454	0.149184	-0.0756612	-0.133663	-0.361745	-0.488775	0.0135512	-0.260795	-0.163417	-0.536134	-0.483323	-0.684257	-0.693967	-0.297264	-0.497649	-0.442155	-0.635255	-0.452916	-0.454473	-0.634883	-0.682625	-0.651467	-0.566844	-0.568073
Lhfpl4	0.0152824	-0.0906258	0.0795534	-0.246105	0.246524	0.175959	-0.43596	-0.596786	-0.64171	-0.752067	-0.633764	-0.474369	-0.5845	0.232224	0.378712	0.166516	0.0898757	0.314094	-0.126209	-0.211192	-0.18851	-0.371225	-0.34864	-0.231735	-0.199925	0.111094	0.125634	0.281376	0.462169	0.0537997	0.317809	0.087387	0.66144	0.597749	0.71905	0.728315	0.0965271	0.310229	0.209061	0.624464	0.464579	0.427167	0.611806	0.616018	0.482796	0.487912	0.438242
Lman1	0.230205	0.263448	0.026203	0.328392	-0.100606	-0.143708	0.615743	0.769508	0.691627	0.693473	0.462898	0.359041	0.342118	0.105482	-0.0726937	0.105356	0.0807911	-0.150758	0.401277	0.482175	0.0911596	0.22967	0.377469	0.157951	0.0927936	-0.08786	-0.189615	-0.416893	-0.540479	0.0377458	-0.246291	-0.190501	-0.505554	-0.470285	-0.683258	-0.706023	-0.390313	-0.555741	-0.514283	-0.635093	-0.449146	-0.458244	-0.655182	-0.710648	-0.710938	-0.605217	-0.62249
Lman2	0.0463972	0.142163	-0.0681546	0.285702	-0.250101	-0.201577	0.535306	0.721942	0.731379	0.826716	0.660202	0.502583	0.590542	-0.169045	-0.335531	-0.104656	-0.044921	-0.299715	0.21699	0.318307	0.19195	0.387922	0.41659	0.254784	0.207718	-0.111362	-0.144337	-0.35037	-0.533784	-0.0343684	-0.337832	-0.129254	-0.70043	-0.632125	-0.801706	-0.812059	-0.188455	-0.426415	-0.329784	-0.712848	-0.522449	-0.495601	-0.702937	-0.725157	-0.614562	-0.584543	-0.548404
Lmf2	0.203721	0.230536	0.00313343	0.28137	-0.132831	-0.169229	0.57662	0.743225	0.655451	0.66371	0.439442	0.352252	0.338336	0.0875732	-0.066651	0.110061	0.0933123	-0.13109	0.37539	0.469665	0.107231	0.248584	0.401782	0.188948	0.12237	-0.0686599	-0.146267	-0.389094	-0.500509	0.0352973	-0.240245	-0.186034	-0.491726	-0.446129	-0.666777	-0.679349	-0.363428	-0.550287	-0.509839	-0.62981	-0.443461	-0.456257	-0.636975	-0.696534	-0.697837	-0.587538	-0.604823
Lnpep	-0.290681	-0.310894	-0.0816629	-0.364925	0.00117876	0.0742993	-0.616683	-0.72441	-0.644928	-0.611084	-0.382005	-0.283266	-0.234424	-0.195334	-0.0027565	-0.145656	-0.0893377	0.116899	-0.439967	-0.486619	-0.0290505	-0.130197	-0.286234	-0.0681368	-0.00782501	0.0968255	0.238928	0.422771	0.530876	-0.056998	0.198199	0.190605	0.406808	0.399543	0.588015	0.625568	0.436735	0.531543	0.509511	0.541922	0.380731	0.393835	0.585906	0.638347	0.668771	0.560855	0.591187
LOC100504608	0.256142	0.314306	0.070796	0.425102	-0.0321068	-0.0755625	0.66646	0.781172	0.748722	0.748328	0.526396	0.376418	0.369378	0.102302	-0.126025	0.0523051	0.0220333	-0.217005	0.414278	0.457506	0.0584936	0.1895	0.29414	0.0805201	0.0263296	-0.13694	-0.285271	-0.45279	-0.610201	0.030244	-0.2608	-0.180047	-0.540226	-0.529489	-0.701064	-0.747476	-0.403885	-0.512967	-0.462727	-0.619754	-0.446415	-0.439318	-0.668124	-0.703723	-0.683566	-0.609102	-0.616666
LOC102635638	-0.00131867	-0.116801	0.0250543	-0.294925	0.139128	0.076071	-0.398208	-0.490189	-0.579286	-0.672645	-0.590591	-0.410787	-0.517224	0.210068	0.378969	0.203717	0.141776	0.332043	-0.10217	-0.13349	-0.125683	-0.269477	-0.19849	-0.114295	-0.101172	0.141729	0.196448	0.259227	0.444095	0.0562184	0.27783	0.055446	0.583139	0.55461	0.606895	0.637787	0.0775626	0.197248	0.10269	0.493642	0.377263	0.327895	0.510361	0.490999	0.354652	0.396244	0.342411
Lonp2	0.128932	0.0902199	0.22456	0.0633224	0.461599	0.375597	-0.24016	-0.511169	-0.438256	-0.567208	-0.445285	-0.420762	-0.516385	0.26461	0.251528	0.0437562	-0.0620402	0.129568	-0.0405391	-0.234295	-0.292363	-0.496484	-0.576829	-0.462913	-0.404989	-0.0354688	-0.172889	0.142658	0.224399	0.0432749	0.27252	0.09905	0.554988	0.416883	0.641918	0.57864	0.00754408	0.386782	0.306744	0.642438	0.455773	0.460836	0.541478	0.596604	0.509183	0.438308	0.409284
Lpo	0.309121	0.30285	0.0666483	0.314156	-0.0276486	-0.11661	0.61249	0.746612	0.619088	0.571737	0.319499	0.258511	0.185328	0.24505	0.0802582	0.219655	0.152953	-0.0511189	0.472521	0.544476	0.0381723	0.139323	0.349021	0.111028	0.0382393	-0.0614382	-0.18523	-0.420798	-0.499312	0.0749941	-0.180535	-0.213391	-0.366018	-0.34598	-0.576554	-0.600321	-0.471411	-0.598583	-0.590368	-0.558701	-0.383985	-0.414445	-0.588439	-0.66172	-0.724322	-0.579292	-0.625531
Lrba	-0.256529	-0.379283	-0.154424	-0.602119	-0.112456	-0.089322	-0.695974	-0.707578	-0.804845	-0.815338	-0.652237	-0.398592	-0.434737	-0.0344387	0.28656	0.11973	0.145571	0.378221	-0.364119	-0.314009	0.0104836	-0.0965571	-0.0628052	0.100773	0.11861	0.244101	0.476044	0.474278	0.705585	0.00421661	0.280796	0.122325	0.593804	0.638322	0.680967	0.77722	0.3533	0.324758	0.249549	0.521623	0.398995	0.347057	0.627816	0.604982	0.518136	0.541896	0.515603
Lrch1	-0.233264	-0.311888	-0.0821044	-0.455301	0.00718975	0.0362551	-0.648979	-0.736995	-0.746336	-0.756909	-0.561673	-0.384455	-0.397844	-0.0581509	0.18676	0.0115945	0.0325505	0.265511	-0.374108	-0.393995	-0.0480083	-0.174336	-0.230228	-0.0402693	0.00154604	0.162788	0.322557	0.440245	0.617584	-0.0142862	0.266867	0.155015	0.556371	0.557221	0.687277	0.744141	0.362352	0.439496	0.379391	0.584589	0.428566	0.407015	0.64387	0.660608	0.614201	0.573569	0.567576
Lrrc31	-0.230281	-0.320779	-0.100533	-0.485052	-0.0281513	-0.0030969	-0.640853	-0.702696	-0.740114	-0.751538	-0.573606	-0.37791	-0.399282	-0.0452574	0.214911	0.0474705	0.0681332	0.29354	-0.356123	-0.35393	-0.0296124	-0.146511	-0.171201	0.00349535	0.0362508	0.182863	0.358764	0.435243	0.624178	-0.00712966	0.263492	0.138916	0.551989	0.565905	0.663976	0.730985	0.344818	0.387602	0.324096	0.546622	0.406086	0.375367	0.618067	0.62155	0.562704	0.54437	0.531586
Lrrc39	0.129151	0.0614742	0.220905	-0.0113421	0.473551	0.373129	-0.3191	-0.597043	-0.554902	-0.703087	-0.571787	-0.501965	-0.622713	0.312579	0.341386	0.101177	-0.0171516	0.210214	-0.0543279	-0.244409	-0.309479	-0.538742	-0.590784	-0.46615	-0.409553	0.00283435	-0.115617	0.194244	0.319169	0.0578054	0.327945	0.103466	0.672537	0.534641	0.756124	0.703903	0.0165375	0.40452	0.303661	0.726767	0.52313	0.513991	0.634937	0.680188	0.559462	0.50697	0.463987
Lrrc40	0.0902546	-0.0408577	0.0657555	-0.234581	0.188323	0.0885879	-0.299265	-0.390752	-0.513677	-0.639813	-0.603658	-0.421097	-0.564956	0.316991	0.457422	0.282568	0.187888	0.360946	0.0062705	-0.0277636	-0.154896	-0.304958	-0.181352	-0.139962	-0.13887	0.135262	0.150013	0.187843	0.376851	0.0846368	0.282195	0.0149762	0.594002	0.554952	0.574033	0.595574	-0.0359303	0.097809	-0.0107074	0.455277	0.35565	0.294513	0.456261	0.421568	0.248619	0.324476	0.251183
Lrrc59	0.221599	0.178034	-0.0635407	0.110645	-0.245595	-0.312368	0.541435	0.796098	0.576518	0.561693	0.280131	0.301043	0.232623	0.185859	0.122656	0.297674	0.265969	0.0456318	0.435847	0.612849	0.155723	0.307673	0.603109	0.341797	0.240445	0.0381232	0.032924	-0.365502	-0.395443	0.0764864	-0.201556	-0.243096	-0.399549	-0.307465	-0.649147	-0.615782	-0.427014	-0.72868	-0.720527	-0.692687	-0.464722	-0.524399	-0.64888	-0.766373	-0.84564	-0.635621	-0.69158
Lrrc71	0.341099	0.440286	0.275077	0.644954	0.353324	0.278821	0.596394	0.473144	0.598237	0.536737	0.424283	0.184739	0.16426	0.191268	-0.141399	-0.0787243	-0.164844	-0.305036	0.367784	0.220823	-0.16288	-0.15946	-0.220607	-0.336791	-0.328549	-0.26209	-0.570753	-0.417808	-0.606311	0.0240637	-0.142724	-0.081982	-0.312045	-0.427582	-0.365839	-0.495332	-0.374637	-0.154123	-0.122426	-0.208318	-0.175257	-0.123835	-0.367969	-0.321428	-0.287179	-0.338006	-0.33089
Lrrc8e	0.0534923	0.0355522	0.186198	0.0332841	0.404515	0.353543	-0.288523	-0.548791	-0.444414	-0.538655	-0.387768	-0.377688	-0.434664	0.160511	0.159335	-0.0333562	-0.106968	0.0823008	-0.119641	-0.305527	-0.255301	-0.44115	-0.566633	-0.426212	-0.360637	-0.038924	-0.145436	0.179966	0.244749	0.0160918	0.245697	0.125854	0.497651	0.372417	0.616289	0.559644	0.0929128	0.445944	0.384751	0.628612	0.439719	0.457314	0.541019	0.608613	0.560989	0.461373	0.451957
Lrrk2	-0.281924	-0.403894	-0.207367	-0.633277	-0.218382	-0.180493	-0.651979	-0.599479	-0.724751	-0.711061	-0.578094	-0.318314	-0.34023	-0.0792709	0.254098	0.129278	0.175438	0.369799	-0.350907	-0.252892	0.0751875	0.0107597	0.0748842	0.210827	0.213456	0.262388	0.530163	0.448568	0.671629	-0.000652079	0.229398	0.0967964	0.490489	0.567964	0.552818	0.666765	0.346523	0.228974	0.166849	0.385132	0.304505	0.246841	0.517263	0.477439	0.400729	0.448766	0.424604
Lsm2	0.111222	0.107083	-0.107767	0.0914265	-0.308396	-0.321092	0.474267	0.729855	0.574655	0.612055	0.381375	0.36666	0.360801	0.0241275	-0.0345853	0.160621	0.176569	-0.046011	0.312776	0.48798	0.199987	0.375067	0.584848	0.369573	0.284611	0.0180285	0.0462599	-0.313574	-0.378581	0.0318749	-0.243265	-0.19557	-0.490264	-0.387238	-0.682935	-0.646904	-0.294744	-0.615028	-0.575873	-0.698262	-0.480938	-0.515963	-0.643087	-0.734047	-0.745769	-0.591732	-0.614251
Lypd6b	0.281121	0.352865	0.149783	0.496055	0.123208	0.0684935	0.613126	0.628646	0.659412	0.634128	0.463902	0.284601	0.271778	0.135515	-0.125387	-0.000315562	-0.0521576	-0.24244	0.380884	0.346769	-0.0323816	0.0424485	0.077994	-0.0889828	-0.116391	-0.18111	-0.387769	-0.421648	-0.584833	0.0271044	-0.203087	-0.134492	-0.427155	-0.4672	-0.539729	-0.617396	-0.377866	-0.35132	-0.310788	-0.431622	-0.320789	-0.296619	-0.522489	-0.524312	-0.500113	-0.477785	-0.479592
Lypla2	0.287856	0.328707	0.104415	0.417909	0.0377339	-0.0275633	0.626657	0.7054	0.665803	0.637257	0.425847	0.294769	0.260929	0.169716	-0.0508667	0.090682	0.03742	-0.168585	0.423038	0.442958	0.011349	0.107369	0.220597	0.0174854	-0.0320036	-0.129447	-0.295236	-0.429701	-0.56158	0.0454023	-0.20735	-0.173129	-0.429451	-0.437609	-0.588067	-0.640187	-0.419237	-0.475797	-0.444959	-0.517775	-0.370555	-0.369656	-0.578281	-0.612991	-0.621252	-0.543519	-0.562748
Lyrm9	-0.000323646	-0.148665	-0.0347535	-0.385934	0.0255941	-0.0454336	-0.376274	-0.387588	-0.557442	-0.649085	-0.616669	-0.38383	-0.509552	0.236547	0.451635	0.302409	0.243399	0.409413	-0.055673	-0.0193689	-0.0654626	-0.177954	-0.0181225	0.0223181	0.00884705	0.200991	0.307284	0.246433	0.463281	0.0745525	0.263017	0.00938536	0.560081	0.572506	0.529995	0.591987	0.0332482	0.0457639	-0.056443	0.374499	0.305338	0.229968	0.429211	0.371326	0.202567	0.308086	0.236201
Macc1	-0.24127	-0.345434	-0.151461	-0.53809	-0.127877	-0.0993427	-0.608537	-0.604597	-0.690376	-0.689516	-0.548033	-0.326899	-0.349832	-0.0549351	0.230472	0.0948264	0.126373	0.32236	-0.32858	-0.274173	0.0274647	-0.0552008	-0.0267065	0.115299	0.129152	0.216829	0.431718	0.416193	0.614581	-0.00144703	0.231835	0.106327	0.491215	0.538594	0.567634	0.656403	0.32132	0.274995	0.214567	0.428264	0.328663	0.283992	0.528379	0.507004	0.439044	0.460133	0.440543
Mad2l1	0.0806034	0.0829799	-0.109665	0.0760544	-0.299108	-0.300678	0.421975	0.659469	0.526368	0.570694	0.367274	0.349243	0.355072	-0.00785702	-0.0587323	0.12487	0.148741	-0.0563829	0.264532	0.427393	0.194068	0.360047	0.539348	0.349345	0.273614	0.0151784	0.0496445	-0.277482	-0.342326	0.0213812	-0.231227	-0.171786	-0.46699	-0.368865	-0.634652	-0.599838	-0.246172	-0.547396	-0.505944	-0.645068	-0.446243	-0.47467	-0.590771	-0.670552	-0.669693	-0.536765	-0.55172
Maged1	0.157089	0.287262	0.0908596	0.509579	0.0216965	0.0364496	0.598092	0.635513	0.744584	0.79202	0.66252	0.421429	0.492989	-0.0751678	-0.351691	-0.17572	-0.164506	-0.387527	0.26153	0.236133	0.0414365	0.166328	0.103007	-0.028483	-0.0417754	-0.219235	-0.391621	-0.402489	-0.629487	-0.0297553	-0.292312	-0.0933043	-0.617272	-0.63708	-0.674111	-0.750504	-0.24433	-0.266093	-0.177416	-0.521383	-0.40112	-0.344274	-0.598464	-0.571046	-0.453637	-0.494686	-0.452542
Magoh	0.297948	0.285022	0.042414	0.282339	-0.0714628	-0.157396	0.612749	0.773448	0.626149	0.584816	0.321581	0.274254	0.201278	0.236856	0.0876603	0.237726	0.17696	-0.0353322	0.47497	0.56893	0.062561	0.176413	0.406327	0.158762	0.078953	-0.0441096	-0.147506	-0.419625	-0.491328	0.0763532	-0.189783	-0.223561	-0.383123	-0.348504	-0.605397	-0.618687	-0.472182	-0.636473	-0.627524	-0.598447	-0.40933	-0.445745	-0.614538	-0.697691	-0.76387	-0.603704	-0.652374
Magt1	-0.00235868	0.0791912	-0.125729	0.191091	-0.342116	-0.280152	0.485906	0.718986	0.695607	0.807437	0.637505	0.51478	0.6087	-0.20564	-0.324818	-0.0825202	-0.00483593	-0.260568	0.184341	0.327359	0.241212	0.456136	0.511971	0.348696	0.292305	-0.0686247	-0.0475275	-0.313555	-0.475459	-0.0372405	-0.342605	-0.134057	-0.706496	-0.608381	-0.816285	-0.802027	-0.152342	-0.45999	-0.362706	-0.752732	-0.54549	-0.529223	-0.710928	-0.748689	-0.641235	-0.589956	-0.555543
Malat1	-0.0465157	-0.062197	0.126475	-0.0726184	0.326468	0.31027	-0.410816	-0.654078	-0.539366	-0.601964	-0.410363	-0.37967	-0.406351	0.0613503	0.11253	-0.0822628	-0.122359	0.0886532	-0.230675	-0.396576	-0.213101	-0.390723	-0.545794	-0.366318	-0.294228	-0.00842117	-0.0542615	0.267616	0.345966	-0.00713852	0.250832	0.160271	0.508774	0.404878	0.661656	0.625351	0.208837	0.523049	0.47027	0.66269	0.462587	0.483428	0.603603	0.67641	0.653069	0.535621	0.53983
Mall	0.23868	0.361286	0.169015	0.585015	0.156368	0.135269	0.622758	0.597255	0.716447	0.721501	0.592909	0.342981	0.3798	0.03058	-0.279861	-0.142361	-0.170306	-0.369224	0.316369	0.241191	-0.0393546	0.0416558	-0.0223531	-0.153655	-0.159054	-0.245175	-0.4797	-0.425773	-0.646217	-0.00884774	-0.243795	-0.0931658	-0.519062	-0.578214	-0.577701	-0.678559	-0.308223	-0.233472	-0.164389	-0.417127	-0.32678	-0.270076	-0.530628	-0.494736	-0.406686	-0.452663	-0.423245
Malt1	-0.233596	-0.263906	-0.0518786	-0.327654	0.0421341	0.0915285	-0.564753	-0.679301	-0.617644	-0.606354	-0.401007	-0.300141	-0.275682	-0.125821	0.0495944	-0.0984421	-0.0640659	0.137015	-0.37741	-0.430763	-0.0538209	-0.163939	-0.291321	-0.0953572	-0.0405713	0.0919865	0.206982	0.384516	0.497071	-0.0392398	0.207764	0.16947	0.427431	0.410362	0.585297	0.61567	0.370362	0.483363	0.451102	0.53608	0.37985	0.386229	0.568155	0.613086	0.619848	0.530104	0.548303
Manba	-0.21568	-0.29642	-0.0847706	-0.442774	-0.00783688	0.0162552	-0.606683	-0.67765	-0.701195	-0.712989	-0.538181	-0.361475	-0.379503	-0.0444898	0.193497	0.0312591	0.049594	0.265948	-0.341277	-0.349786	-0.0379986	-0.153454	-0.189427	-0.0185228	0.016293	0.163407	0.320683	0.411615	0.58524	-0.00895334	0.251351	0.13751	0.525352	0.531893	0.638556	0.696819	0.330144	0.387552	0.328429	0.534128	0.394379	0.369136	0.595368	0.604309	0.552935	0.526434	0.516729
Manf	0.193595	0.228779	-0.0268177	0.288522	-0.200857	-0.225858	0.635686	0.845404	0.746943	0.774365	0.524875	0.427838	0.428231	0.05136	-0.109779	0.103782	0.101667	-0.15936	0.395371	0.518928	0.151863	0.327754	0.495176	0.25851	0.181818	-0.0692106	-0.132462	-0.426204	-0.555905	0.0296248	-0.289848	-0.206422	-0.593183	-0.527308	-0.786007	-0.791312	-0.378161	-0.623617	-0.56934	-0.745538	-0.526009	-0.538881	-0.740007	-0.808408	-0.795443	-0.672994	-0.685928
Maoa	0.0906456	0.0355126	0.193161	-0.0227241	0.424472	0.344187	-0.321893	-0.580592	-0.527198	-0.652818	-0.516365	-0.456681	-0.554608	0.251946	0.283876	0.0629589	-0.0354978	0.178577	-0.0845651	-0.261336	-0.277428	-0.486698	-0.555191	-0.426096	-0.369263	0.000907616	-0.0984699	0.199219	0.310059	0.0432129	0.298893	0.109223	0.611947	0.486735	0.704466	0.657695	0.0514428	0.40786	0.320418	0.681871	0.488194	0.484922	0.600426	0.648608	0.551255	0.489307	0.456947
Maob	-0.275941	-0.32012	-0.0839889	-0.411459	0.00400548	0.0615331	-0.647462	-0.750622	-0.704317	-0.687371	-0.46516	-0.332193	-0.306915	-0.145855	0.0731518	-0.086917	-0.0432139	0.179776	-0.42627	-0.463721	-0.0377092	-0.151994	-0.272526	-0.0593367	-0.00464407	0.125943	0.279063	0.441987	0.58094	-0.0415164	0.231561	0.181918	0.478729	0.474384	0.645087	0.691384	0.41951	0.510291	0.472337	0.575046	0.411147	0.410774	0.626321	0.666035	0.666538	0.582372	0.599025
Map10	0.0917888	0.204355	0.00449031	0.385369	-0.123617	-0.0886987	0.554455	0.669346	0.72828	0.802755	0.658112	0.46182	0.544192	-0.131368	-0.346764	-0.143318	-0.104519	-0.341449	0.228816	0.269793	0.121715	0.283312	0.264495	0.12114	0.0912083	-0.161191	-0.256964	-0.367634	-0.570804	-0.0340351	-0.314514	-0.108513	-0.657521	-0.630535	-0.733982	-0.774811	-0.205452	-0.340737	-0.247458	-0.615087	-0.460252	-0.418537	-0.64522	-0.642723	-0.526942	-0.533195	-0.493031
Mapk9	0.05444	-0.0253646	0.156054	-0.128532	0.378934	0.300485	-0.411943	-0.651352	-0.6312	-0.757084	-0.610549	-0.503096	-0.61007	0.251871	0.339527	0.102894	0.009372	0.248832	-0.123835	-0.276321	-0.259819	-0.475255	-0.517362	-0.376665	-0.324052	0.0492007	-0.00478902	0.261226	0.411356	0.0479123	0.332734	0.114631	0.685613	0.577204	0.776868	0.751285	0.0899305	0.414494	0.315258	0.722036	0.523719	0.50699	0.665036	0.700513	0.583882	0.540927	0.50078
Mb21d1	0.310589	0.27885	0.0381902	0.246619	-0.0753361	-0.173401	0.595952	0.764863	0.588955	0.535322	0.263003	0.242385	0.151119	0.275166	0.146071	0.286111	0.216036	0.0131307	0.490244	0.594656	0.0596583	0.166375	0.427515	0.172657	0.0870116	-0.0207413	-0.1145	-0.409349	-0.457934	0.0888338	-0.167901	-0.233505	-0.33535	-0.296453	-0.572342	-0.577982	-0.489859	-0.663264	-0.666016	-0.584504	-0.393782	-0.441333	-0.593675	-0.688345	-0.777944	-0.59663	-0.656288
Mbd3	0.0621528	0.0856484	-0.108855	0.111218	-0.301173	-0.287478	0.438067	0.669215	0.567447	0.627447	0.434521	0.387581	0.41538	-0.0556293	-0.126723	0.0694747	0.105608	-0.110592	0.244112	0.397661	0.201026	0.37675	0.521215	0.339736	0.270216	-0.00923423	0.0178085	-0.286843	-0.377331	0.00647049	-0.25729	-0.160387	-0.523583	-0.42835	-0.674495	-0.646907	-0.222674	-0.518168	-0.462898	-0.664245	-0.466129	-0.482205	-0.615788	-0.68312	-0.65491	-0.545368	-0.547507
Mbd5	-0.208794	-0.241538	-0.0247116	-0.30463	0.0909228	0.128826	-0.564368	-0.703491	-0.636101	-0.639233	-0.429904	-0.331629	-0.318421	-0.0917076	0.0736462	-0.0900684	-0.0687149	0.143804	-0.364548	-0.436902	-0.0833402	-0.210569	-0.341483	-0.142016	-0.0833075	0.0832963	0.177627	0.381989	0.497766	-0.032921	0.227506	0.172636	0.467367	0.435843	0.627713	0.649556	0.354259	0.503807	0.464516	0.581259	0.411804	0.418678	0.600604	0.649733	0.64708	0.553299	0.567695
Mbtd1	-0.162323	-0.242904	-0.0740001	-0.385449	-0.0151531	-0.0056631	-0.4958	-0.541905	-0.586874	-0.605639	-0.475733	-0.31147	-0.340905	-0.00469828	0.203028	0.0672448	0.0748786	0.25344	-0.258136	-0.253368	-0.029403	-0.125366	-0.125452	0.00302175	0.0249301	0.151412	0.286989	0.335633	0.493582	0.00339692	0.216571	0.0996731	0.454636	0.465278	0.530845	0.584829	0.247522	0.280734	0.224177	0.430647	0.322843	0.292795	0.486804	0.483084	0.422419	0.42085	0.403727
Mcfd2	0.312752	0.334274	0.0973904	0.393265	0.0205684	-0.0596872	0.644064	0.744817	0.666859	0.626249	0.390064	0.28387	0.229518	0.215418	0.00870208	0.151504	0.0878504	-0.122757	0.462822	0.502212	0.0175075	0.115941	0.274416	0.0493166	-0.0113198	-0.106613	-0.264555	-0.442437	-0.555539	0.0611516	-0.199595	-0.196389	-0.410166	-0.409309	-0.596675	-0.640181	-0.460687	-0.542634	-0.52182	-0.545876	-0.383884	-0.396412	-0.597872	-0.649725	-0.683661	-0.574722	-0.607105
Mcm2	0.130377	0.0975772	-0.116416	0.0366197	-0.319273	-0.350086	0.452783	0.7243	0.523767	0.54337	0.296595	0.322665	0.289332	0.0812923	0.0532257	0.235562	0.238028	0.0272954	0.33828	0.531868	0.198673	0.365184	0.624678	0.396201	0.301393	0.0542796	0.0984282	-0.300533	-0.33095	0.0509304	-0.212895	-0.212633	-0.423456	-0.312323	-0.640424	-0.591998	-0.32361	-0.662319	-0.640371	-0.685204	-0.462902	-0.515271	-0.618388	-0.727935	-0.775103	-0.587219	-0.626545
Mcm5	0.138047	0.105917	-0.107271	0.0474886	-0.303495	-0.337244	0.455694	0.719069	0.522274	0.538122	0.292709	0.315733	0.280058	0.0897815	0.0565499	0.235007	0.233885	0.0255735	0.342337	0.529235	0.189586	0.351445	0.607898	0.380526	0.287244	0.0495485	0.0860652	-0.303155	-0.334531	0.0521567	-0.208741	-0.21137	-0.415327	-0.309082	-0.630873	-0.585816	-0.328511	-0.655177	-0.634541	-0.673246	-0.454859	-0.50628	-0.611095	-0.718589	-0.76709	-0.581782	-0.621579
Mcm6	0.158166	0.128158	-0.0873727	0.0764166	-0.271671	-0.312301	0.472476	0.72112	0.53114	0.539131	0.292751	0.307348	0.26654	0.109336	0.0619588	0.235279	0.226184	0.0190065	0.357678	0.53167	0.171858	0.326245	0.578534	0.349825	0.258718	0.0378389	0.0563457	-0.315895	-0.351573	0.0553154	-0.204266	-0.211859	-0.407008	-0.310576	-0.622454	-0.584994	-0.34544	-0.64928	-0.630641	-0.65876	-0.445533	-0.495016	-0.606907	-0.710902	-0.762075	-0.580588	-0.621601
Mcm7	0.211187	0.185626	-0.048651	0.147967	-0.218208	-0.275451	0.540302	0.771287	0.58698	0.579254	0.316198	0.310822	0.257775	0.155827	0.0726082	0.246293	0.219899	0.00149518	0.412374	0.567881	0.143799	0.291977	0.54808	0.302824	0.211339	0.0123787	-0.00844218	-0.364501	-0.413894	0.064619	-0.209051	-0.225258	-0.418222	-0.337757	-0.645578	-0.623172	-0.402659	-0.674385	-0.657956	-0.669117	-0.454111	-0.501436	-0.637307	-0.73907	-0.797257	-0.61473	-0.660013
Mcoln1	-0.0434333	-0.0554243	0.132434	-0.0591687	0.335596	0.319631	-0.403908	-0.652529	-0.531183	-0.593804	-0.400812	-0.376758	-0.401729	0.0600589	0.104231	-0.090344	-0.13098	0.0788916	-0.229394	-0.400504	-0.217359	-0.395843	-0.557322	-0.376858	-0.303179	-0.0153811	-0.0675443	0.262758	0.33617	-0.00841139	0.248493	0.161912	0.503267	0.396038	0.658737	0.619154	0.207532	0.529403	0.47803	0.664548	0.462705	0.485928	0.601588	0.677279	0.657149	0.535092	0.540827
Mctp1	0.156051	0.143645	0.254314	0.162935	0.494656	0.41101	-0.153149	-0.438222	-0.331337	-0.455308	-0.342494	-0.366036	-0.448268	0.252239	0.186082	-0.00219954	-0.108616	0.0553807	-0.0083557	-0.222369	-0.302287	-0.495997	-0.604682	-0.501448	-0.43959	-0.082279	-0.259367	0.0833988	0.124313	0.0358137	0.233486	0.094634	0.470645	0.319202	0.560236	0.477775	-0.022888	0.379828	0.313978	0.593124	0.41342	0.432563	0.470905	0.538668	0.47458	0.383805	0.364414
Mdh2	0.0977973	0.155681	-0.0389511	0.245582	-0.187519	-0.175564	0.491203	0.655123	0.622959	0.676332	0.504433	0.393609	0.433666	-0.0558402	-0.195919	-0.00880483	0.0168808	-0.199875	0.252648	0.344657	0.14396	0.300314	0.37666	0.211762	0.16116	-0.0793328	-0.12107	-0.325597	-0.460191	-0.00416801	-0.265598	-0.138251	-0.547845	-0.492594	-0.667928	-0.675761	-0.233145	-0.433249	-0.368266	-0.610686	-0.439991	-0.432228	-0.60541	-0.641208	-0.585584	-0.525673	-0.514074
Me3	-0.151446	-0.181885	0.0387659	-0.230933	0.199652	0.214969	-0.541048	-0.734507	-0.645752	-0.676826	-0.461284	-0.381401	-0.387285	-0.0260944	0.104487	-0.0861749	-0.0914058	0.137324	-0.330554	-0.447432	-0.146399	-0.30591	-0.452344	-0.248109	-0.180138	0.0528044	0.0943253	0.361494	0.472774	-0.0222633	0.257456	0.178385	0.526467	0.461724	0.693105	0.692313	0.31413	0.545024	0.495282	0.661173	0.466237	0.478075	0.648754	0.710105	0.694825	0.586974	0.596377
Mea1	0.121447	0.220519	0.0244429	0.384108	-0.0863391	-0.0686888	0.547928	0.648531	0.693982	0.748927	0.60059	0.418137	0.479769	-0.0788146	-0.291073	-0.105755	-0.083626	-0.306635	0.25125	0.283505	0.0960797	0.239931	0.238444	0.0921761	0.0614793	-0.154368	-0.261806	-0.365767	-0.552645	-0.0208517	-0.286068	-0.113183	-0.597844	-0.579927	-0.682431	-0.725682	-0.231989	-0.343731	-0.263278	-0.572839	-0.426841	-0.391684	-0.6093	-0.610811	-0.517343	-0.513183	-0.483079
Med27	0.0416758	0.0864946	-0.11302	0.144163	-0.313499	-0.283174	0.459572	0.69074	0.617592	0.695616	0.509909	0.434353	0.48551	-0.107605	-0.198149	0.0150172	0.0653338	-0.166059	0.225656	0.37457	0.214327	0.404139	0.51683	0.340853	0.275995	-0.0321549	-0.0093512	-0.299477	-0.416711	-0.00887635	-0.28879	-0.151743	-0.591138	-0.495607	-0.727949	-0.705973	-0.200498	-0.499017	-0.428562	-0.697667	-0.495915	-0.500163	-0.652644	-0.709209	-0.652601	-0.564009	-0.553121
Med29	0.162556	0.175144	-0.0254284	0.198326	-0.163335	-0.192618	0.48876	0.661912	0.560669	0.572769	0.368079	0.313171	0.298946	0.0707288	-0.0399941	0.121109	0.112254	-0.0867594	0.324525	0.431236	0.118536	0.252258	0.410068	0.216985	0.151511	-0.0354512	-0.0770013	-0.32843	-0.412245	0.0333734	-0.21188	-0.171326	-0.431175	-0.375207	-0.595613	-0.593336	-0.31278	-0.515264	-0.48167	-0.579243	-0.404042	-0.423282	-0.568873	-0.632419	-0.640933	-0.526845	-0.545886
Mettl1	0.174358	0.120299	-0.0790974	0.0325253	-0.245525	-0.303779	0.424142	0.661702	0.44629	0.432764	0.189352	0.237642	0.171147	0.165314	0.143841	0.289063	0.263825	0.0843712	0.362319	0.534186	0.148678	0.279368	0.557827	0.333318	0.240841	0.063794	0.0871737	-0.285596	-0.287615	0.0708676	-0.157403	-0.212217	-0.30791	-0.215964	-0.530063	-0.487383	-0.355018	-0.641929	-0.642152	-0.588739	-0.389612	-0.45093	-0.534829	-0.646907	-0.729374	-0.5313	-0.585848
Mgll	0.184463	0.329101	0.137135	0.581132	0.100535	0.108936	0.617748	0.609932	0.755005	0.791923	0.676227	0.404968	0.476588	-0.0586215	-0.370895	-0.208738	-0.208873	-0.424289	0.268685	0.204188	-0.00107956	0.104814	0.00671579	-0.113379	-0.115295	-0.25557	-0.469719	-0.418255	-0.663062	-0.0317781	-0.283916	-0.0797469	-0.603696	-0.649845	-0.643394	-0.740461	-0.254146	-0.211312	-0.122086	-0.467792	-0.368681	-0.30041	-0.571341	-0.526617	-0.401292	-0.468415	-0.421687
Mia2	-0.0765579	-0.116544	0.08831	-0.171201	0.274601	0.259086	-0.48248	-0.699787	-0.622336	-0.68478	-0.490907	-0.414351	-0.4507	0.064098	0.166963	-0.0374705	-0.0729907	0.155907	-0.257607	-0.395072	-0.19095	-0.369679	-0.492191	-0.308472	-0.243125	0.0386965	0.0367846	0.317268	0.43187	-0.00111624	0.27674	0.159128	0.566318	0.481406	0.711618	0.696656	0.235425	0.509973	0.446617	0.680911	0.482838	0.489425	0.646735	0.704352	0.661292	0.567293	0.562937
Micu3	-0.227278	-0.322086	-0.109868	-0.49419	-0.0481411	-0.0246045	-0.627956	-0.674612	-0.725474	-0.736179	-0.569384	-0.367319	-0.391495	-0.0406829	0.223894	0.0635966	0.0847049	0.302523	-0.343291	-0.329167	-0.0183082	-0.127851	-0.136863	0.0277629	0.0554114	0.190595	0.373224	0.426886	0.618563	-0.00399308	0.256832	0.128965	0.539433	0.560448	0.640528	0.712079	0.332582	0.355681	0.291893	0.51754	0.38736	0.352602	0.594725	0.591464	0.52806	0.521043	0.505408
Mien1	0.127086	0.156766	-0.00808066	0.207529	-0.11482	-0.129305	0.418239	0.543788	0.493212	0.511902	0.35523	0.28094	0.285439	0.0272844	-0.0879021	0.0499703	0.0487292	-0.120782	0.253268	0.323711	0.0912176	0.203149	0.297906	0.148677	0.102497	-0.0566353	-0.107212	-0.280648	-0.373008	0.0158957	-0.190889	-0.128682	-0.391997	-0.355123	-0.510146	-0.519042	-0.242064	-0.387041	-0.349155	-0.475478	-0.337753	-0.341451	-0.478237	-0.516684	-0.501469	-0.431888	-0.436884
Mill2	-0.213041	-0.255061	-0.0354428	-0.334254	0.0755631	0.111374	-0.581467	-0.711087	-0.658898	-0.663938	-0.457265	-0.343212	-0.335657	-0.0840225	0.0970348	-0.0694693	-0.0485646	0.168437	-0.36619	-0.42859	-0.0771277	-0.204701	-0.320711	-0.122997	-0.067547	0.0990047	0.205885	0.393695	0.521937	-0.0290118	0.236025	0.169239	0.486482	0.461024	0.641038	0.669663	0.35551	0.491633	0.447957	0.583378	0.416191	0.417382	0.610368	0.653137	0.641441	0.558174	0.568377
Mir129.1	-0.00807443	0.106887	-0.014486	0.285153	-0.109132	-0.0456772	0.352659	0.420349	0.522919	0.611874	0.551276	0.374026	0.479939	-0.209862	-0.372516	-0.216495	-0.156765	-0.325337	0.0736061	0.0884487	0.106029	0.232595	0.143148	0.0790248	0.0737432	-0.142551	-0.199939	-0.229198	-0.406801	-0.0585225	-0.253432	-0.0373629	-0.533797	-0.515113	-0.539977	-0.574106	-0.050881	-0.13995	-0.0497754	-0.42609	-0.330446	-0.278269	-0.447978	-0.420462	-0.28428	-0.339539	-0.284164
Mir143	-0.365073	-0.373451	-0.167842	-0.422922	-0.159036	-0.0483852	-0.595012	-0.619598	-0.556805	-0.47446	-0.264459	-0.164883	-0.0774783	-0.307839	-0.0917501	-0.176624	-0.0776538	0.0825735	-0.47057	-0.454823	0.0696908	0.0294446	-0.115095	0.0855609	0.131952	0.118392	0.322362	0.415582	0.505663	-0.0780613	0.122982	0.175619	0.253877	0.29378	0.423468	0.486627	0.478533	0.451306	0.455128	0.372974	0.26037	0.273283	0.456324	0.495151	0.559546	0.46491	0.508632
Mir221	0.155709	0.0106621	0.0904921	-0.199102	0.215522	0.0888168	-0.22823	-0.313712	-0.467009	-0.61671	-0.616727	-0.427741	-0.600067	0.395932	0.519955	0.34676	0.22873	0.3883	0.0868061	0.0557143	-0.171709	-0.324386	-0.156451	-0.148587	-0.158001	0.135443	0.125621	0.136731	0.331618	0.106451	0.285077	-0.017139	0.601859	0.558222	0.546781	0.564028	-0.119988	0.0162666	-0.103071	0.420636	0.336087	0.264481	0.413233	0.364698	0.162808	0.267966	0.179283
Mir3068	0.199995	0.277189	0.0478929	0.41264	-0.0642542	-0.0806672	0.630023	0.745391	0.744381	0.769989	0.573986	0.407498	0.431441	0.0215817	-0.202979	-0.0152231	-0.0216108	-0.260835	0.351473	0.394226	0.0807943	0.222968	0.285309	0.0952208	0.0491999	-0.145726	-0.276227	-0.424884	-0.598684	0.0080712	-0.280431	-0.155958	-0.582966	-0.566456	-0.715203	-0.759775	-0.336533	-0.455347	-0.389996	-0.62064	-0.452995	-0.433908	-0.662768	-0.68535	-0.631984	-0.585141	-0.576197
Misp	0.299673	0.294101	0.0415662	0.302925	-0.0795968	-0.16203	0.640684	0.807344	0.665396	0.629614	0.36022	0.301054	0.234431	0.224923	0.0640539	0.225622	0.16834	-0.0567449	0.483575	0.579466	0.0702321	0.193392	0.419473	0.165656	0.0848008	-0.0536173	-0.161389	-0.437936	-0.521762	0.0731426	-0.207959	-0.227877	-0.421253	-0.384995	-0.645808	-0.661334	-0.479262	-0.651046	-0.636118	-0.631458	-0.434443	-0.467791	-0.648976	-0.731083	-0.788911	-0.630943	-0.6764
Mlec	-0.00720427	0.0370801	-0.180583	0.0833084	-0.437804	-0.385418	0.470486	0.769869	0.668891	0.777455	0.571402	0.509729	0.580688	-0.172854	-0.236056	0.0169497	0.0947693	-0.167927	0.212283	0.414433	0.288356	0.521485	0.659759	0.465659	0.386881	-0.00415366	0.0701411	-0.301742	-0.421382	-0.018265	-0.335931	-0.169222	-0.685316	-0.551543	-0.83944	-0.794168	-0.179799	-0.576625	-0.492339	-0.822115	-0.581663	-0.591842	-0.743698	-0.81683	-0.746472	-0.636348	-0.621034
Mllt10	-0.325905	-0.379786	-0.138943	-0.495393	-0.0845077	-0.0113214	-0.691495	-0.751291	-0.730662	-0.695038	-0.474274	-0.313281	-0.278255	-0.189642	0.070842	-0.0758864	-0.012752	0.20719	-0.461097	-0.460306	0.0107746	-0.0835056	-0.184382	0.0288681	0.075748	0.162314	0.365781	0.475307	0.630066	-0.046996	0.222072	0.179331	0.462252	0.485928	0.623464	0.691978	0.458225	0.483273	0.448511	0.53303	0.385212	0.376982	0.61375	0.640854	0.643391	0.575318	0.592672
Mmachc	0.160914	0.149844	-0.087832	0.127883	-0.287688	-0.319156	0.536837	0.796782	0.622951	0.644588	0.385979	0.370408	0.34598	0.0783884	0.0019383	0.201733	0.201312	-0.0352359	0.374944	0.551143	0.1884	0.363937	0.603131	0.361716	0.269244	0.0131378	0.0199386	-0.358046	-0.42383	0.0465909	-0.247122	-0.219903	-0.497222	-0.398204	-0.715534	-0.684387	-0.359075	-0.677121	-0.643755	-0.7326	-0.502491	-0.543556	-0.685287	-0.785183	-0.814754	-0.641303	-0.673725
Mmp13	-0.0491275	0.00871611	-0.166905	0.0762501	-0.391314	-0.323811	0.380701	0.631652	0.578646	0.693126	0.539631	0.465644	0.553986	-0.216292	-0.275233	-0.0504588	0.0353481	-0.191129	0.131352	0.298242	0.26065	0.468618	0.544846	0.399152	0.340219	-0.0186865	0.052561	-0.24089	-0.36251	-0.0354225	-0.306646	-0.123185	-0.628633	-0.51303	-0.734084	-0.697483	-0.099792	-0.439124	-0.352835	-0.702886	-0.503579	-0.499693	-0.634923	-0.683547	-0.592183	-0.525897	-0.497401
Mocs1	-0.0460091	-0.140614	0.0399928	-0.285897	0.184974	0.141289	-0.475397	-0.616714	-0.648245	-0.730843	-0.595378	-0.438742	-0.521008	0.152923	0.317041	0.119431	0.068918	0.289297	-0.184803	-0.253987	-0.150753	-0.315281	-0.316213	-0.183291	-0.148938	0.117864	0.165359	0.312002	0.485028	0.0347309	0.296081	0.103088	0.616136	0.568534	0.692076	0.711423	0.160337	0.33838	0.250709	0.600171	0.444272	0.412962	0.603948	0.612663	0.506133	0.497294	0.460584
Mogs	0.233737	0.25468	-0.00864157	0.296028	-0.173327	-0.218266	0.656286	0.862405	0.74233	0.749943	0.484138	0.399838	0.377214	0.11108	-0.0517988	0.152202	0.132154	-0.125782	0.437906	0.559748	0.13286	0.298205	0.494588	0.243204	0.161484	-0.0626266	-0.139232	-0.442646	-0.559115	0.0457382	-0.27199	-0.221839	-0.554797	-0.494417	-0.766468	-0.773474	-0.424309	-0.658674	-0.616195	-0.735847	-0.51485	-0.536274	-0.735513	-0.812519	-0.824213	-0.683057	-0.708027
Morf4l2	0.123542	0.113048	-0.0964463	0.0893626	-0.285483	-0.306205	0.463339	0.707867	0.548825	0.576291	0.347667	0.339773	0.324123	0.0487917	-0.00747916	0.175854	0.183584	-0.0286801	0.318311	0.486439	0.184437	0.348155	0.562712	0.34961	0.265692	0.0209601	0.0431374	-0.307517	-0.363697	0.0376318	-0.225683	-0.194559	-0.453714	-0.356729	-0.647066	-0.612798	-0.302534	-0.606266	-0.573871	-0.66656	-0.45705	-0.494616	-0.615329	-0.706687	-0.728846	-0.572406	-0.599346
Morn2	-0.224231	-0.0982208	-0.206135	0.064138	-0.424523	-0.273096	0.230033	0.43608	0.515817	0.704079	0.661737	0.52145	0.708827	-0.466713	-0.526187	-0.296882	-0.142418	-0.344618	-0.0941569	0.0349278	0.291152	0.50847	0.41291	0.368084	0.348882	-0.0666533	0.0374974	-0.130548	-0.307098	-0.109912	-0.341801	-0.0213173	-0.711268	-0.600354	-0.698978	-0.670373	0.137119	-0.170263	-0.0393788	-0.612671	-0.46267	-0.411606	-0.543446	-0.533381	-0.331387	-0.380584	-0.295193
Mpg	-0.101538	-0.0873872	0.108632	-0.0555096	0.297558	0.312917	-0.42212	-0.667036	-0.507079	-0.538124	-0.321416	-0.324512	-0.311682	-0.0345887	0.00411357	-0.172428	-0.185281	0.0153385	-0.290233	-0.461594	-0.189146	-0.349473	-0.560062	-0.358586	-0.276582	-0.0327464	-0.0701981	0.27892	0.325466	-0.0345526	0.21453	0.184986	0.430232	0.329606	0.61519	0.575353	0.27427	0.582168	0.551334	0.64123	0.438397	0.477021	0.583153	0.67405	0.695784	0.541782	0.567666
Mrpl10	0.032324	0.111061	-0.0582406	0.228555	-0.207185	-0.165528	0.430098	0.582467	0.59174	0.671334	0.538221	0.409994	0.483745	-0.143883	-0.277504	-0.0893958	-0.0387881	-0.245361	0.170467	0.253487	0.15836	0.318473	0.339151	0.209718	0.17197	-0.0899782	-0.114172	-0.281106	-0.43053	-0.0295825	-0.275424	-0.103078	-0.571107	-0.514643	-0.65125	-0.658958	-0.146919	-0.342089	-0.262614	-0.578793	-0.424505	-0.40208	-0.569582	-0.586965	-0.494901	-0.472162	-0.44167
Mrpl11	0.229657	0.244577	0.0273559	0.280886	-0.0847516	-0.137342	0.557284	0.700649	0.606521	0.594765	0.37455	0.29939	0.266115	0.137152	-0.014079	0.139079	0.105608	-0.0986853	0.387547	0.466514	0.0750878	0.193598	0.355207	0.146587	0.0823648	-0.0645092	-0.155947	-0.378748	-0.473732	0.0466696	-0.205799	-0.183958	-0.420254	-0.387531	-0.596398	-0.613316	-0.380115	-0.532161	-0.504935	-0.566642	-0.396106	-0.41349	-0.58268	-0.642476	-0.664069	-0.5498	-0.575671
Mrpl15	0.225297	0.20267	-0.051491	0.169833	-0.235122	-0.293861	0.589484	0.837317	0.645464	0.640378	0.358019	0.345022	0.292481	0.158483	0.0629686	0.253678	0.227578	-0.011383	0.44239	0.607912	0.156415	0.31873	0.587615	0.324047	0.226572	0.00711167	-0.0180552	-0.397401	-0.457079	0.0666212	-0.232176	-0.241205	-0.465557	-0.379614	-0.707754	-0.685565	-0.431231	-0.722911	-0.701994	-0.728102	-0.495774	-0.54402	-0.695543	-0.802618	-0.859345	-0.667412	-0.713495
Mrpl17	0.244349	0.264175	0.0339105	0.309621	-0.0820248	-0.136682	0.595298	0.742	0.649546	0.637838	0.406826	0.320529	0.287825	0.1416	-0.0249682	0.137617	0.102376	-0.114934	0.40957	0.48822	0.0761053	0.20105	0.364824	0.145634	0.079396	-0.0750994	-0.177325	-0.404646	-0.510314	0.0475505	-0.220599	-0.192456	-0.451242	-0.419585	-0.634403	-0.655348	-0.401595	-0.55558	-0.524998	-0.598018	-0.419325	-0.435129	-0.618465	-0.678655	-0.697514	-0.58172	-0.607183
Mrpl20	0.189307	0.185247	-0.0544909	0.179694	-0.233636	-0.273557	0.562176	0.794806	0.638719	0.64992	0.393693	0.35979	0.330795	0.101783	-0.000375725	0.191369	0.179955	-0.0545021	0.393366	0.545469	0.158997	0.322418	0.547052	0.306944	0.219836	-0.0100618	-0.033901	-0.377243	-0.453665	0.0488993	-0.241942	-0.216929	-0.488595	-0.40691	-0.702112	-0.684804	-0.379721	-0.656851	-0.624771	-0.705757	-0.486175	-0.521705	-0.676603	-0.767891	-0.797089	-0.635198	-0.667227
Mrpl34	0.0710632	0.167672	-0.0354788	0.317704	-0.191005	-0.153098	0.534308	0.689017	0.711888	0.792825	0.634795	0.469321	0.548035	-0.137827	-0.318966	-0.105882	-0.0593162	-0.300743	0.225647	0.301719	0.157058	0.333261	0.349965	0.19561	0.154928	-0.125825	-0.18435	-0.352132	-0.535637	-0.0298726	-0.317207	-0.121875	-0.659391	-0.609302	-0.753191	-0.775022	-0.20051	-0.392157	-0.301667	-0.657428	-0.484455	-0.454595	-0.663809	-0.678199	-0.573738	-0.553805	-0.51968
Mrpl35	-0.00958907	0.056468	-0.137334	0.142277	-0.353313	-0.295781	0.444565	0.683426	0.639895	0.745871	0.5784	0.481849	0.565293	-0.18967	-0.28244	-0.0519692	0.023027	-0.217812	0.174453	0.326866	0.242526	0.450054	0.524294	0.36449	0.305522	-0.0441763	-0.00551582	-0.285822	-0.42496	-0.0309348	-0.319512	-0.133886	-0.656723	-0.553109	-0.770453	-0.746975	-0.143972	-0.460705	-0.372563	-0.724671	-0.521229	-0.513323	-0.673235	-0.7185	-0.62675	-0.562832	-0.535163
Mrpl38	0.172935	0.19925	-0.0515974	0.24107	-0.238715	-0.259429	0.606992	0.83573	0.720332	0.752865	0.502844	0.42505	0.425508	0.0405411	-0.0964236	0.118801	0.123072	-0.134847	0.380171	0.521776	0.17108	0.352545	0.534265	0.298027	0.21725	-0.0473269	-0.0857829	-0.40553	-0.521873	0.0298314	-0.286438	-0.208026	-0.58423	-0.50569	-0.780992	-0.774774	-0.361962	-0.63612	-0.583606	-0.754186	-0.529178	-0.547931	-0.734233	-0.810194	-0.801827	-0.668558	-0.683592
Mrpl39	0.00301409	0.108337	-0.0396992	0.268721	-0.166303	-0.106641	0.400836	0.512766	0.579244	0.671439	0.576684	0.412844	0.512418	-0.199017	-0.354361	-0.17437	-0.112909	-0.307544	0.114809	0.163339	0.139441	0.289611	0.243436	0.148146	0.128057	-0.124734	-0.166008	-0.260662	-0.43497	-0.0503336	-0.278372	-0.0674404	-0.582156	-0.543457	-0.620356	-0.642933	-0.0900009	-0.235987	-0.144749	-0.519521	-0.391935	-0.350105	-0.526396	-0.51754	-0.391812	-0.415718	-0.367527
Mrpl4	0.0449482	0.0936581	-0.11006	0.157945	-0.311448	-0.280372	0.473458	0.704243	0.635364	0.71477	0.526957	0.444502	0.498016	-0.11065	-0.208649	0.00848145	0.059256	-0.177189	0.230677	0.377875	0.214582	0.407044	0.516345	0.338095	0.273421	-0.0385462	-0.0206084	-0.30882	-0.432268	-0.0101134	-0.295874	-0.153042	-0.606241	-0.511798	-0.743292	-0.723665	-0.205091	-0.502505	-0.429616	-0.708473	-0.504605	-0.506929	-0.665884	-0.721032	-0.660713	-0.574423	-0.562056
Mrpl40	0.179808	0.214423	0.000831089	0.276227	-0.129352	-0.155537	0.545509	0.700484	0.631889	0.647848	0.44273	0.348742	0.346499	0.0575238	-0.0945311	0.0774692	0.0684392	-0.147035	0.340309	0.425927	0.105875	0.243725	0.371658	0.176386	0.116617	-0.0741419	-0.148029	-0.367232	-0.482918	0.0257816	-0.237658	-0.168943	-0.487826	-0.445226	-0.644081	-0.658252	-0.327482	-0.502723	-0.458198	-0.600657	-0.425775	-0.432296	-0.608786	-0.659262	-0.64751	-0.554516	-0.564633
Mrpl42	0.179073	0.168267	-0.0389624	0.153683	-0.187469	-0.230759	0.486153	0.683227	0.539195	0.539468	0.31379	0.292187	0.256465	0.114655	0.0283425	0.186818	0.168843	-0.028784	0.353982	0.483461	0.127082	0.261227	0.466913	0.25576	0.179067	-0.00415161	-0.0294475	-0.327409	-0.385246	0.0493328	-0.196863	-0.191902	-0.396325	-0.328825	-0.58711	-0.572568	-0.344067	-0.575904	-0.554415	-0.595717	-0.408057	-0.442705	-0.572626	-0.65479	-0.691736	-0.544515	-0.577651
Mrpl52	0.152685	0.221855	0.0150769	0.338597	-0.105155	-0.109101	0.55395	0.68053	0.672	0.70799	0.530612	0.388222	0.419196	-0.0120575	-0.198718	-0.0183657	-0.0117643	-0.233349	0.298229	0.355429	0.10022	0.241999	0.302609	0.131043	0.0861862	-0.118284	-0.21225	-0.371411	-0.526242	0.00172949	-0.265264	-0.141323	-0.550188	-0.521045	-0.670246	-0.700586	-0.282017	-0.423535	-0.359772	-0.59092	-0.429923	-0.41435	-0.615002	-0.639856	-0.585111	-0.53836	-0.527471
Mrpl53	0.10103	0.0807021	-0.114732	0.0383326	-0.306786	-0.324265	0.414398	0.665807	0.495262	0.524485	0.304676	0.317729	0.300537	0.0417412	0.0121988	0.187379	0.199286	0.00068252	0.292119	0.47003	0.192829	0.353151	0.574649	0.370736	0.286259	0.0425279	0.0870825	-0.273689	-0.312432	0.0376783	-0.209558	-0.188368	-0.418942	-0.31452	-0.60885	-0.564875	-0.276474	-0.593151	-0.565296	-0.642089	-0.437044	-0.479563	-0.579426	-0.67483	-0.703054	-0.541405	-0.570385
Mrpl57	-0.00331273	0.0475473	-0.142391	0.109117	-0.357846	-0.308901	0.42453	0.66954	0.603796	0.700719	0.528307	0.454258	0.523922	-0.162113	-0.236444	-0.0150566	0.0534785	-0.177987	0.181596	0.342438	0.240768	0.442014	0.53968	0.376264	0.313154	-0.0241864	0.0243155	-0.273012	-0.392592	-0.021744	-0.300473	-0.139903	-0.615339	-0.50795	-0.738984	-0.70873	-0.152976	-0.477073	-0.398322	-0.709068	-0.50567	-0.506551	-0.651248	-0.705293	-0.63168	-0.551873	-0.532558
Mrps17	0.109727	0.102354	-0.116886	0.0804	-0.325979	-0.338573	0.478864	0.746252	0.581372	0.620386	0.383047	0.374011	0.367088	0.0240504	-0.029268	0.170974	0.188435	-0.0387643	0.318054	0.502817	0.209809	0.390499	0.610883	0.38968	0.301186	0.0250461	0.0605821	-0.316239	-0.378514	0.0333956	-0.247722	-0.201611	-0.498551	-0.389496	-0.698001	-0.657812	-0.299424	-0.635626	-0.596466	-0.718045	-0.49358	-0.531531	-0.657535	-0.753323	-0.767665	-0.605854	-0.630036
Mrps18a	0.355081	0.372579	0.121876	0.430103	0.05396	-0.042474	0.688204	0.781647	0.695737	0.639869	0.387036	0.276935	0.207171	0.262248	0.0378173	0.178509	0.0994711	-0.116997	0.50876	0.540529	-0.00159958	0.0911073	0.265492	0.0246192	-0.0390887	-0.115346	-0.29673	-0.474543	-0.588925	0.0725302	-0.196436	-0.210835	-0.403506	-0.411368	-0.605204	-0.656011	-0.509147	-0.574567	-0.559406	-0.552854	-0.387455	-0.402929	-0.615747	-0.671041	-0.71874	-0.600011	-0.639651
Mrps18b	0.308978	0.275922	0.0373581	0.241452	-0.0753447	-0.173567	0.589677	0.758055	0.581126	0.526977	0.256084	0.237907	0.145906	0.275957	0.149674	0.28782	0.217608	0.0170795	0.487465	0.592025	0.0591053	0.164453	0.426127	0.172707	0.0872423	-0.0185445	-0.1106	-0.405131	-0.451386	0.0891272	-0.164803	-0.232463	-0.328822	-0.289792	-0.565143	-0.570039	-0.487267	-0.66025	-0.663927	-0.578838	-0.389453	-0.437562	-0.587273	-0.68217	-0.772962	-0.591313	-0.651391
Mrps2	0.248543	0.200396	-0.0318177	0.130959	-0.186199	-0.266795	0.5317	0.755313	0.541913	0.509094	0.235125	0.256178	0.173443	0.227373	0.15609	0.309148	0.261698	0.0590211	0.446189	0.600007	0.119006	0.248057	0.539064	0.284722	0.188643	0.0305454	0.00283454	-0.361681	-0.384489	0.084246	-0.17299	-0.237125	-0.341437	-0.266832	-0.586373	-0.562352	-0.441534	-0.697764	-0.699345	-0.628541	-0.418995	-0.478651	-0.59917	-0.711566	-0.803529	-0.598553	-0.659483
Mrps21	-0.0785938	0.0192593	-0.112203	0.155346	-0.277513	-0.190616	0.319992	0.479214	0.525832	0.647234	0.564645	0.432943	0.552969	-0.276092	-0.375573	-0.182494	-0.0907008	-0.282056	0.0443298	0.135928	0.200531	0.373398	0.334882	0.252583	0.227324	-0.0810486	-0.0544042	-0.200873	-0.356998	-0.0639558	-0.287549	-0.0583327	-0.598069	-0.525448	-0.62939	-0.624277	-0.013992	-0.236045	-0.138191	-0.55078	-0.41113	-0.375185	-0.520243	-0.521272	-0.3842	-0.399495	-0.345519
Mrps7	0.291711	0.280917	0.0357725	0.28048	-0.08437	-0.166659	0.616828	0.784083	0.636948	0.600252	0.335509	0.286453	0.217623	0.225767	0.0768962	0.232617	0.175783	-0.0412756	0.472483	0.571035	0.0708903	0.190374	0.419702	0.17068	0.0899498	-0.0439359	-0.143133	-0.421719	-0.496503	0.0740045	-0.19767	-0.224601	-0.399362	-0.361115	-0.622096	-0.633821	-0.468627	-0.642582	-0.63077	-0.614273	-0.420927	-0.456723	-0.627641	-0.711336	-0.773401	-0.613176	-0.660159
Ms4a10	-0.0428982	-0.175464	-0.00820493	-0.386338	0.100194	0.0436038	-0.486384	-0.565991	-0.674883	-0.76444	-0.666058	-0.449267	-0.557683	0.195456	0.412165	0.222645	0.168768	0.383362	-0.150432	-0.164245	-0.110081	-0.25961	-0.177233	-0.0760959	-0.063791	0.180027	0.275161	0.320248	0.535822	0.0557533	0.306064	0.0670513	0.64402	0.628946	0.674592	0.722874	0.125709	0.221942	0.11967	0.537122	0.412689	0.354768	0.574428	0.548142	0.401797	0.452038	0.394972
Msi2	-0.269791	-0.388471	-0.153466	-0.605334	-0.105265	-0.0769412	-0.718383	-0.740079	-0.825126	-0.832476	-0.656249	-0.406053	-0.436323	-0.0495317	0.273073	0.10081	0.130121	0.370646	-0.386175	-0.343403	0.00635367	-0.105267	-0.0875666	0.0880926	0.110707	0.240745	0.473684	0.489706	0.719703	-0.00100312	0.285849	0.133896	0.603303	0.644509	0.702873	0.79758	0.375483	0.358203	0.284427	0.547192	0.415375	0.367193	0.651805	0.635025	0.554907	0.567494	0.545141
Msrb1	0.0105548	0.147812	0.00010737	0.363694	-0.102701	-0.0345499	0.436591	0.505736	0.630907	0.728788	0.653714	0.437039	0.556882	-0.228594	-0.433941	-0.252637	-0.189532	-0.389667	0.104752	0.11239	0.110812	0.255022	0.148434	0.0690547	0.0638115	-0.178473	-0.262418	-0.285514	-0.499392	-0.0655681	-0.297184	-0.0468457	-0.626708	-0.612562	-0.636261	-0.683053	-0.0792528	-0.166842	-0.0620587	-0.496741	-0.386266	-0.323471	-0.531397	-0.496873	-0.339181	-0.405888	-0.342106
Mt3	0.2239	0.287192	0.0574435	0.403019	-0.0469392	-0.0778236	0.628576	0.741403	0.721305	0.731769	0.527219	0.376822	0.382462	0.0657949	-0.151949	0.0246733	0.00544933	-0.225884	0.374793	0.41786	0.0670963	0.19889	0.284332	0.0869411	0.0374281	-0.134462	-0.269032	-0.425694	-0.583696	0.0203939	-0.260201	-0.16481	-0.539673	-0.525976	-0.684246	-0.727565	-0.362823	-0.474592	-0.42	-0.601229	-0.435224	-0.423985	-0.644451	-0.674279	-0.641765	-0.579916	-0.580768
Mtap7d3	-0.0555235	-0.14717	0.000172954	-0.293269	0.0979401	0.0642329	-0.411575	-0.496114	-0.551902	-0.615067	-0.513493	-0.358068	-0.429281	0.121352	0.285908	0.129776	0.0943227	0.27364	-0.156347	-0.184876	-0.0959765	-0.220531	-0.192195	-0.0907754	-0.0710733	0.127005	0.197228	0.272012	0.431855	0.0321857	0.243598	0.074698	0.509989	0.489524	0.55888	0.590617	0.137507	0.238873	0.163823	0.463538	0.348992	0.313264	0.48628	0.47965	0.38198	0.396113	0.360714
Mterf3	-0.0195336	0.118227	-0.0291841	0.329937	-0.151823	-0.0715569	0.421574	0.513649	0.632519	0.744589	0.669745	0.459916	0.59062	-0.263906	-0.45343	-0.26031	-0.183696	-0.390087	0.0836071	0.110091	0.139505	0.298094	0.194162	0.115398	0.107064	-0.165828	-0.225255	-0.273053	-0.485986	-0.0721294	-0.310933	-0.0466967	-0.654113	-0.625314	-0.663413	-0.700249	-0.0551236	-0.177978	-0.0675634	-0.529174	-0.408807	-0.347111	-0.549588	-0.519051	-0.353142	-0.416453	-0.349084
Mtx1	-0.0446486	-0.0163269	-0.209028	-0.000307411	-0.46903	-0.411351	0.38638	0.694268	0.576141	0.687075	0.497607	0.470096	0.538507	-0.184251	-0.203535	0.0342037	0.118546	-0.119705	0.166812	0.383007	0.299812	0.525586	0.673086	0.496028	0.417193	0.0306491	0.14086	-0.243764	-0.334412	-0.0184421	-0.307208	-0.157248	-0.623733	-0.478992	-0.770381	-0.709754	-0.134743	-0.549206	-0.472734	-0.775223	-0.544236	-0.562123	-0.678869	-0.757663	-0.69713	-0.580061	-0.567877
Muc4	0.393164	0.496457	0.278275	0.710108	0.326768	0.241178	0.730813	0.645132	0.747124	0.68475	0.518824	0.26121	0.234334	0.219588	-0.148463	-0.0467905	-0.139227	-0.330196	0.459378	0.333738	-0.141019	-0.106799	-0.128892	-0.295712	-0.30338	-0.276786	-0.60497	-0.508865	-0.720912	0.0343757	-0.195049	-0.126604	-0.41888	-0.524749	-0.515275	-0.647847	-0.464004	-0.284656	-0.245383	-0.350729	-0.274917	-0.227627	-0.512708	-0.480983	-0.450493	-0.473501	-0.472021
Muc6	0.337525	0.341602	0.114443	0.376395	0.0569325	-0.0409885	0.619375	0.704837	0.610034	0.54852	0.312542	0.227537	0.150318	0.270106	0.0749863	0.194394	0.11379	-0.0761821	0.477266	0.508812	-0.0092348	0.0677457	0.245516	0.0214686	-0.0395543	-0.0930741	-0.257336	-0.428336	-0.518256	0.075215	-0.162365	-0.198252	-0.331928	-0.339461	-0.524862	-0.568423	-0.479741	-0.537681	-0.532356	-0.48803	-0.338455	-0.359277	-0.543944	-0.600668	-0.660448	-0.539814	-0.583525
Mvb12a	0.199004	0.165754	-0.0369583	0.117014	-0.178946	-0.238979	0.464204	0.663747	0.488572	0.470958	0.23685	0.245804	0.186193	0.167097	0.102136	0.24425	0.212311	0.0294529	0.373127	0.509408	0.115749	0.236668	0.476772	0.259079	0.176957	0.02092	0.00185939	-0.314395	-0.344229	0.0651702	-0.165499	-0.20171	-0.328807	-0.26025	-0.535132	-0.513869	-0.366862	-0.599077	-0.593058	-0.565256	-0.379962	-0.427273	-0.537378	-0.631487	-0.697834	-0.527751	-0.574448
Mvb12b	0.223494	0.301569	0.0719845	0.442432	-0.0240231	-0.049428	0.64317	0.739277	0.745395	0.760322	0.564843	0.39098	0.407366	0.0475954	-0.191153	-0.0123719	-0.0290877	-0.263793	0.367459	0.394141	0.0576407	0.18857	0.246538	0.0565338	0.0134525	-0.15759	-0.308649	-0.435574	-0.611698	0.0125271	-0.270681	-0.155323	-0.563814	-0.559524	-0.695176	-0.748361	-0.354782	-0.444242	-0.382673	-0.595015	-0.435588	-0.414834	-0.64919	-0.667715	-0.619407	-0.576826	-0.570031
Myadm	0.0305104	0.134984	-0.039297	0.295212	-0.181131	-0.128682	0.465329	0.597792	0.648137	0.738251	0.615289	0.44666	0.540395	-0.179541	-0.349209	-0.151005	-0.0939008	-0.312649	0.162695	0.223884	0.150484	0.315254	0.293546	0.171756	0.14273	-0.128241	-0.177349	-0.304478	-0.486986	-0.043352	-0.301463	-0.0913461	-0.628811	-0.58433	-0.690642	-0.713391	-0.137087	-0.305779	-0.212452	-0.589347	-0.439899	-0.401888	-0.59605	-0.596481	-0.476116	-0.482735	-0.439006
Myg1	-0.0590604	0.0118899	-0.173816	0.0987094	-0.410368	-0.33262	0.409038	0.668954	0.628479	0.755754	0.599245	0.507222	0.610168	-0.248743	-0.321213	-0.0792341	0.0162693	-0.227044	0.129477	0.299717	0.27621	0.499014	0.562425	0.413164	0.354273	-0.0319628	0.0382627	-0.258571	-0.398868	-0.0440908	-0.334482	-0.124177	-0.687248	-0.567698	-0.790208	-0.755637	-0.0949388	-0.447552	-0.350413	-0.747231	-0.538326	-0.528272	-0.679204	-0.724218	-0.615388	-0.556994	-0.52105
Myl12a	0.217987	0.26208	0.0243008	0.343311	-0.105315	-0.139549	0.62182	0.773842	0.711725	0.722735	0.497965	0.37994	0.375194	0.0779808	-0.10907	0.0760795	0.0589144	-0.17843	0.388452	0.465886	0.096815	0.241223	0.371055	0.15634	0.0942484	-0.0992915	-0.20279	-0.42004	-0.556539	0.0295004	-0.260355	-0.184303	-0.535951	-0.501091	-0.704718	-0.730389	-0.375691	-0.540632	-0.491695	-0.64641	-0.460373	-0.463185	-0.668365	-0.717641	-0.703219	-0.609446	-0.619816
Myo6	-0.262791	-0.372966	-0.16297	-0.577402	-0.13704	-0.104578	-0.656941	-0.654353	-0.743017	-0.740575	-0.585865	-0.350194	-0.372598	-0.0644411	0.241691	0.0958618	0.131146	0.34237	-0.358017	-0.30096	0.0296027	-0.0592682	-0.0330149	0.121992	0.13793	0.231373	0.46241	0.449431	0.661092	-0.00326343	0.24841	0.116726	0.526091	0.576521	0.611091	0.705996	0.350436	0.302287	0.238377	0.462914	0.354494	0.307723	0.570137	0.548737	0.478327	0.498016	0.478316
Myo9a	-0.284647	-0.298948	-0.0423842	-0.338452	0.0828024	0.15145	-0.66148	-0.823912	-0.710163	-0.688997	-0.427069	-0.34018	-0.293795	-0.181511	-0.000294952	-0.17533	-0.129244	0.108387	-0.468451	-0.556631	-0.0777436	-0.211364	-0.40666	-0.158598	-0.0828366	0.0769865	0.192463	0.450582	0.55934	-0.0596685	0.234568	0.219181	0.478731	0.444711	0.689513	0.711886	0.461163	0.629481	0.601323	0.655601	0.457368	0.47938	0.678629	0.749781	0.782245	0.64487	0.678609
Myof	-0.221048	-0.40623	-0.291808	-0.743085	-0.402175	-0.398729	-0.524645	-0.319135	-0.608337	-0.607103	-0.599164	-0.251439	-0.326361	0.0255011	0.414847	0.348165	0.382254	0.509997	-0.190138	0.0314224	0.173736	0.170922	0.426915	0.450433	0.395992	0.358012	0.690951	0.363893	0.637059	0.0477924	0.188728	-0.0166308	0.420887	0.568029	0.355363	0.518227	0.187941	-0.123267	-0.202749	0.113723	0.136964	0.0271793	0.304082	0.185209	0.0338276	0.218167	0.151703
Mysm1	0.130513	0.0359982	0.171052	-0.085232	0.37821	0.271297	-0.297852	-0.507893	-0.532844	-0.679229	-0.590125	-0.477074	-0.613505	0.33405	0.400255	0.18282	0.0671205	0.273005	-0.0142774	-0.147725	-0.258618	-0.460924	-0.438907	-0.351551	-0.317306	0.0514358	-0.0245066	0.181612	0.332164	0.0729419	0.31395	0.0644459	0.64988	0.546287	0.68812	0.661629	-0.0215731	0.276297	0.169533	0.624134	0.460709	0.430086	0.563837	0.57695	0.429763	0.430596	0.372748
Mzb1	0.0937724	0.153942	-0.0270188	0.248787	-0.159587	-0.147308	0.464612	0.607541	0.58959	0.63974	0.483776	0.369887	0.410702	-0.0562779	-0.197204	-0.0234368	0.00018804	-0.202224	0.233894	0.3105	0.126933	0.270532	0.329391	0.179171	0.135201	-0.0850355	-0.133421	-0.30831	-0.441408	-0.00662278	-0.25016	-0.124485	-0.517187	-0.471331	-0.623175	-0.635718	-0.215748	-0.388682	-0.325795	-0.562005	-0.407093	-0.39565	-0.563253	-0.591261	-0.533523	-0.486475	-0.47274
Naa38	0.0552052	0.0867886	-0.100581	0.125821	-0.283914	-0.265628	0.428834	0.645062	0.561724	0.62435	0.443828	0.385532	0.420385	-0.0697815	-0.148555	0.0436396	0.0819846	-0.129394	0.227801	0.368813	0.192397	0.363423	0.486628	0.316189	0.252563	-0.0208822	-0.00104913	-0.280601	-0.378555	0.000549237	-0.256364	-0.148915	-0.5233	-0.434949	-0.660834	-0.638671	-0.206267	-0.483011	-0.42471	-0.641463	-0.452941	-0.4629	-0.599196	-0.657927	-0.620046	-0.525483	-0.522429
Naa50	0.138958	0.0908527	-0.130306	0.00445632	-0.345199	-0.383857	0.45551	0.748891	0.517522	0.531625	0.268086	0.316602	0.270458	0.106017	0.0950969	0.279753	0.278124	0.0645804	0.359101	0.572231	0.210446	0.381324	0.675258	0.432178	0.328522	0.0765609	0.134739	-0.302484	-0.316643	0.0609908	-0.20798	-0.228673	-0.410512	-0.288663	-0.647246	-0.589089	-0.345022	-0.711526	-0.696289	-0.709226	-0.474674	-0.537727	-0.631601	-0.755029	-0.819951	-0.607922	-0.65633
Naaladl2	0.0574086	-0.00555334	0.170744	-0.080293	0.398732	0.325978	-0.383153	-0.635957	-0.58942	-0.709587	-0.558345	-0.478329	-0.573369	0.232399	0.29415	0.0645411	-0.0260194	0.204222	-0.124043	-0.291431	-0.266385	-0.478821	-0.547324	-0.403483	-0.345519	0.0228265	-0.0499412	0.241868	0.369584	0.0398256	0.315022	0.120682	0.646447	0.529457	0.748096	0.711855	0.0913263	0.434382	0.343986	0.712672	0.511945	0.505292	0.644143	0.690432	0.59144	0.530107	0.498094
Nae1	-0.297237	-0.396535	-0.169414	-0.586131	-0.138892	-0.0914222	-0.696669	-0.706053	-0.769983	-0.755382	-0.576263	-0.349721	-0.355105	-0.108708	0.201019	0.0514481	0.0986515	0.319631	-0.405359	-0.357233	0.0318283	-0.0591126	-0.0658001	0.111585	0.13594	0.224834	0.463142	0.477685	0.682803	-0.0166987	0.248562	0.138611	0.524586	0.572947	0.633886	0.727654	0.399384	0.361634	0.304219	0.494177	0.372673	0.334224	0.601655	0.591719	0.540005	0.537353	0.527687
Nagk	-0.23089	-0.347796	-0.157906	-0.560846	-0.139737	-0.119312	-0.608366	-0.591777	-0.700892	-0.706931	-0.577351	-0.338415	-0.373465	-0.029641	0.268292	0.131173	0.157272	0.353785	-0.311088	-0.24467	0.0314173	-0.0512059	0.00364648	0.135353	0.143049	0.233385	0.456214	0.4156	0.62793	0.00754826	0.240015	0.0947251	0.51018	0.563475	0.571864	0.666988	0.302756	0.241171	0.174029	0.419094	0.326339	0.273263	0.525685	0.494155	0.410399	0.449689	0.422252
Napa	0.42251	0.483202	0.24041	0.626371	0.253174	0.144292	0.750304	0.728501	0.742204	0.663926	0.446424	0.250051	0.186384	0.292352	-0.0310519	0.0801062	-0.024738	-0.227727	0.526165	0.456621	-0.106948	-0.0582718	0.0194924	-0.19261	-0.226363	-0.215888	-0.507067	-0.522426	-0.690891	0.0636595	-0.185315	-0.175393	-0.390868	-0.46627	-0.546335	-0.652153	-0.532345	-0.433465	-0.412535	-0.429294	-0.315767	-0.298767	-0.561551	-0.569911	-0.589778	-0.542787	-0.567365
Naprt	-0.0122078	-0.0217116	0.175992	-0.014729	0.414396	0.385383	-0.40524	-0.69711	-0.555614	-0.636373	-0.43096	-0.419139	-0.454923	0.0982623	0.121857	-0.095894	-0.153212	0.0741375	-0.219938	-0.425464	-0.263555	-0.467973	-0.648005	-0.456647	-0.373928	-0.0361452	-0.12268	0.260515	0.332297	-0.00349012	0.274661	0.172851	0.555042	0.423279	0.721917	0.666591	0.193735	0.578008	0.519307	0.738238	0.512795	0.540879	0.653206	0.740268	0.713807	0.576547	0.58049
Nasp	0.12934	0.107049	-0.109326	0.0634467	-0.309928	-0.336162	0.46771	0.731887	0.547767	0.571954	0.328947	0.338605	0.313596	0.0662095	0.0235807	0.210549	0.215911	-0.0002605	0.335285	0.520549	0.196245	0.365176	0.607752	0.382051	0.290614	0.0388888	0.073303	-0.310394	-0.354411	0.0452562	-0.224148	-0.208163	-0.448263	-0.341617	-0.658067	-0.615564	-0.319697	-0.648686	-0.620928	-0.691183	-0.470341	-0.516421	-0.630546	-0.733386	-0.768886	-0.59268	-0.626582
Nat8	-0.152415	-0.274692	-0.0796383	-0.482995	-0.00450295	-0.018055	-0.585036	-0.633013	-0.728046	-0.774793	-0.641919	-0.414561	-0.481854	0.0703788	0.332971	0.157798	0.146171	0.366789	-0.26053	-0.245465	-0.0492254	-0.175439	-0.125976	0.00802187	0.0246679	0.205095	0.365351	0.393381	0.610026	0.0266185	0.286969	0.0971415	0.60483	0.618191	0.667524	0.737436	0.243417	0.280048	0.194617	0.524698	0.40092	0.349143	0.594241	0.572896	0.462811	0.493973	0.45532
Nbas	0.322109	0.358799	0.103393	0.442745	0.0179816	-0.0576646	0.700715	0.806062	0.742163	0.709446	0.462719	0.330568	0.286957	0.198521	-0.0354255	0.126588	0.0669099	-0.166585	0.482407	0.519762	0.0248743	0.137584	0.28544	0.0493662	-0.011895	-0.129387	-0.302281	-0.480145	-0.617945	0.0556836	-0.231724	-0.203439	-0.47809	-0.478203	-0.667485	-0.718257	-0.47797	-0.564225	-0.532694	-0.599991	-0.426035	-0.43161	-0.658744	-0.706622	-0.725014	-0.622927	-0.649247
Ncbp1	0.13749	0.147015	-0.0952301	0.155477	-0.305105	-0.319102	0.555261	0.8177	0.670832	0.711478	0.460085	0.417796	0.417159	0.0241036	-0.0691219	0.148219	0.163051	-0.0886425	0.354327	0.528134	0.204428	0.395066	0.603769	0.367947	0.279681	-0.00743827	-0.00181943	-0.368399	-0.459754	0.0309986	-0.278842	-0.211362	-0.565032	-0.464084	-0.769539	-0.742643	-0.334539	-0.659379	-0.610762	-0.767934	-0.533367	-0.56314	-0.722284	-0.812195	-0.813431	-0.659903	-0.679333
Ndc1	0.117697	0.0802158	-0.134278	0.00911764	-0.349083	-0.376463	0.442681	0.730403	0.518039	0.542449	0.292156	0.328932	0.296762	0.0719882	0.0576074	0.2449	0.252467	0.0395278	0.332328	0.540016	0.214838	0.38837	0.658669	0.427442	0.328932	0.0674883	0.12785	-0.292673	-0.316858	0.0507584	-0.216071	-0.216229	-0.428725	-0.307819	-0.650467	-0.594343	-0.316543	-0.678855	-0.656656	-0.70326	-0.47389	-0.529979	-0.626468	-0.741734	-0.790576	-0.594427	-0.63478
Ndufa2	0.0850915	0.166716	-0.0577176	0.290972	-0.23939	-0.209208	0.567878	0.762052	0.744479	0.823424	0.633807	0.489342	0.555937	-0.114386	-0.282064	-0.0530007	-0.00855187	-0.267953	0.26547	0.373155	0.183405	0.376353	0.440424	0.257617	0.202548	-0.102455	-0.144206	-0.374328	-0.546484	-0.0184182	-0.32955	-0.150416	-0.681325	-0.613191	-0.807053	-0.816542	-0.239527	-0.481377	-0.394409	-0.729173	-0.529286	-0.512122	-0.72065	-0.754725	-0.667681	-0.613988	-0.589915
Ndufa3	0.184866	0.261445	0.0295954	0.392982	-0.0964633	-0.106683	0.626906	0.759057	0.751137	0.784768	0.585471	0.423898	0.453131	0.00349232	-0.21191	-0.015318	-0.014215	-0.259493	0.344196	0.400453	0.0996347	0.251973	0.319978	0.127097	0.0779407	-0.137229	-0.25295	-0.421416	-0.594486	0.00530974	-0.290463	-0.158878	-0.602846	-0.576443	-0.73812	-0.776201	-0.327427	-0.470942	-0.402396	-0.647629	-0.471432	-0.45393	-0.680605	-0.707168	-0.650327	-0.59858	-0.588381
Ndufa4	0.22811	0.243887	0.0178182	0.280265	-0.106138	-0.15644	0.574823	0.732427	0.632215	0.625186	0.396011	0.320165	0.289537	0.129808	-0.0219488	0.141859	0.111963	-0.103058	0.395757	0.484814	0.0886502	0.217308	0.386444	0.169476	0.1015	-0.0626311	-0.148928	-0.389842	-0.488468	0.0461609	-0.21936	-0.19145	-0.44771	-0.408311	-0.630972	-0.644981	-0.386923	-0.55806	-0.527623	-0.601855	-0.420691	-0.439157	-0.613383	-0.67706	-0.696473	-0.576324	-0.601919
Ndufaf3	0.0462565	0.0719978	-0.0972555	0.101917	-0.266914	-0.249966	0.382724	0.584088	0.502977	0.560429	0.395636	0.34834	0.379083	-0.0638575	-0.129025	0.0456242	0.081436	-0.109627	0.204602	0.337454	0.179142	0.335566	0.452485	0.297173	0.238078	-0.0128522	0.0112507	-0.250043	-0.334917	0.0012085	-0.231248	-0.136331	-0.471421	-0.387999	-0.598176	-0.575032	-0.184919	-0.44354	-0.391529	-0.584632	-0.411852	-0.422818	-0.542592	-0.598315	-0.566134	-0.476579	-0.474855
Ndufb3	0.154171	0.200648	0.0172303	0.282106	-0.085155	-0.101492	0.48546	0.59971	0.570417	0.589152	0.423094	0.315741	0.325946	0.0289388	-0.125564	0.0247021	0.0197467	-0.169274	0.284279	0.339298	0.080248	0.197734	0.276618	0.117117	0.073023	-0.0899247	-0.172147	-0.326876	-0.446823	0.0132772	-0.216114	-0.134491	-0.446581	-0.420636	-0.565952	-0.589317	-0.272461	-0.397779	-0.351626	-0.509218	-0.366356	-0.361194	-0.528629	-0.559223	-0.531273	-0.47314	-0.473194
Ndufb6	0.0494682	0.0123892	-0.188682	-0.0677974	-0.432608	-0.434748	0.382747	0.703149	0.4856	0.536566	0.299982	0.353044	0.342828	-0.000683726	0.0220847	0.221788	0.255918	0.043657	0.270786	0.507571	0.262208	0.454782	0.719618	0.502068	0.401922	0.0936742	0.203529	-0.247846	-0.265142	0.0358851	-0.229078	-0.204807	-0.454138	-0.308823	-0.664636	-0.589693	-0.250009	-0.666727	-0.635748	-0.728342	-0.491306	-0.548116	-0.625034	-0.743702	-0.775953	-0.580906	-0.613023
Ndufb8	-0.0382393	0.00412287	-0.153941	0.0494536	-0.357385	-0.302515	0.335694	0.567808	0.504399	0.601773	0.457859	0.405208	0.475648	-0.176058	-0.218464	-0.0199874	0.0529965	-0.147274	0.126823	0.283911	0.235056	0.419892	0.505679	0.369796	0.313236	-0.0042409	0.0658523	-0.212552	-0.310371	-0.0255298	-0.266347	-0.116915	-0.54445	-0.437193	-0.647846	-0.610439	-0.099466	-0.412333	-0.340318	-0.629877	-0.448291	-0.450739	-0.564377	-0.614647	-0.544254	-0.472846	-0.452842
Nedd8	0.139249	0.128016	-0.0891944	0.104738	-0.277797	-0.303851	0.485589	0.730638	0.56787	0.590992	0.353878	0.343415	0.323025	0.0639372	-3.38e-05	0.185525	0.18847	-0.0291283	0.337834	0.505228	0.180544	0.344854	0.566526	0.345373	0.259488	0.0172726	0.0313043	-0.323213	-0.381575	0.0415345	-0.228629	-0.201786	-0.459689	-0.364538	-0.660307	-0.628393	-0.322605	-0.624471	-0.593081	-0.678737	-0.465234	-0.503864	-0.63083	-0.724148	-0.750357	-0.589282	-0.618625
Nefh	-0.159126	-0.221643	0.00712792	-0.325381	0.154821	0.16035	-0.593669	-0.757423	-0.720752	-0.761069	-0.556263	-0.423556	-0.451182	0.00780979	0.188816	-0.0125829	-0.022037	0.221932	-0.32976	-0.415076	-0.129582	-0.292076	-0.386327	-0.189695	-0.132876	0.104414	0.184287	0.397144	0.550721	-0.007236	0.288	0.165351	0.594666	0.548481	0.740029	0.760778	0.311499	0.501288	0.435545	0.67049	0.482778	0.475039	0.681832	0.721494	0.673299	0.601988	0.596061
Nek7	-0.191218	-0.261114	-0.0705897	-0.387639	0.002254	0.0237803	-0.54182	-0.611203	-0.62674	-0.63792	-0.478845	-0.324964	-0.340218	-0.040007	0.168612	0.0218013	0.0374356	0.232171	-0.306501	-0.319188	-0.0388889	-0.144423	-0.182341	-0.0271412	0.00574186	0.141394	0.277355	0.367385	0.520107	-0.00891206	0.225625	0.125588	0.47102	0.473639	0.575433	0.624992	0.296316	0.3558	0.303354	0.485246	0.357195	0.336407	0.536847	0.547462	0.503424	0.475533	0.467904
Neu1	-0.049741	-0.0894651	0.123076	-0.138188	0.337583	0.310304	-0.484028	-0.735138	-0.644327	-0.722574	-0.519983	-0.45092	-0.497774	0.0987741	0.186647	-0.0371084	-0.087019	0.156445	-0.247776	-0.41184	-0.22831	-0.42838	-0.562583	-0.371186	-0.299229	0.0240334	-0.00485761	0.315675	0.430953	0.00411933	0.299484	0.166642	0.611717	0.507498	0.764473	0.737508	0.221883	0.545568	0.475258	0.740496	0.52389	0.533312	0.689149	0.754728	0.704315	0.600281	0.593394
Neurl4	-0.135958	-0.0332464	-0.159288	0.102124	-0.353981	-0.243325	0.285779	0.476611	0.522091	0.66963	0.595022	0.469998	0.612719	-0.345634	-0.420471	-0.209728	-0.093056	-0.291659	-0.00310765	0.114567	0.245773	0.440636	0.39507	0.320665	0.293371	-0.0644681	0.001859	-0.173703	-0.331364	-0.078663	-0.309816	-0.0511829	-0.643179	-0.548665	-0.666254	-0.646407	0.0386535	-0.234542	-0.125507	-0.592443	-0.441404	-0.404191	-0.540087	-0.543377	-0.386974	-0.404578	-0.341576
Nfil3	0.248822	0.242248	-0.0128483	0.240487	-0.172483	-0.234641	0.619433	0.831781	0.673406	0.662354	0.388964	0.344423	0.295335	0.165917	0.0344005	0.219086	0.185285	-0.0534606	0.452043	0.585313	0.124285	0.275122	0.512203	0.255489	0.167242	-0.028454	-0.0910295	-0.419439	-0.500307	0.0631209	-0.234106	-0.231565	-0.473047	-0.408606	-0.701525	-0.697958	-0.442355	-0.68295	-0.658503	-0.698717	-0.48055	-0.517484	-0.68926	-0.781008	-0.826617	-0.65816	-0.698623
Nfix	-0.131438	-0.182373	0.0309713	-0.263762	0.184461	0.185529	-0.537675	-0.712256	-0.660823	-0.704241	-0.508592	-0.400892	-0.427302	0.0180507	0.166949	-0.0265851	-0.041837	0.1876	-0.299346	-0.398238	-0.142228	-0.302504	-0.406224	-0.219296	-0.161178	0.0781593	0.130076	0.358242	0.491565	-0.00707987	0.271112	0.159102	0.557933	0.501572	0.700262	0.708796	0.280968	0.489804	0.428869	0.647315	0.463113	0.461464	0.644054	0.689209	0.647745	0.569265	0.565653
Ngfrap1	0.0975432	0.0651301	-0.147366	-0.000504516	-0.370456	-0.388289	0.433915	0.72878	0.522045	0.556586	0.31122	0.34498	0.323186	0.043553	0.033005	0.226895	0.243714	0.0275457	0.313996	0.526997	0.228413	0.409373	0.67088	0.44416	0.346433	0.0679973	0.138444	-0.285342	-0.314175	0.0438202	-0.226158	-0.211508	-0.449823	-0.323452	-0.665614	-0.606606	-0.296238	-0.671216	-0.643535	-0.716168	-0.484391	-0.537856	-0.634273	-0.747723	-0.786212	-0.59531	-0.630762
Nipa1	0.0149035	-0.0545323	0.132137	-0.146089	0.340709	0.280939	-0.431329	-0.659317	-0.626279	-0.732729	-0.574847	-0.474031	-0.560569	0.196256	0.29084	0.0657212	-0.00999561	0.224566	-0.161451	-0.305502	-0.235365	-0.43768	-0.499166	-0.348096	-0.293168	0.0491469	0.0137331	0.27699	0.417879	0.0340372	0.314488	0.125368	0.647238	0.548306	0.751729	0.731069	0.131256	0.434408	0.345746	0.701985	0.506625	0.495552	0.654013	0.694028	0.598029	0.543204	0.512943
Nkg7	-0.0239036	0.0980098	-0.0315744	0.284364	-0.143503	-0.0699701	0.368078	0.453458	0.55773	0.659655	0.594264	0.410228	0.52807	-0.24077	-0.404841	-0.232255	-0.161749	-0.344822	0.0685113	0.0953035	0.128692	0.271349	0.17935	0.110526	0.102782	-0.144027	-0.19154	-0.237812	-0.425665	-0.0652411	-0.276997	-0.0406333	-0.582473	-0.55428	-0.59003	-0.620634	-0.042763	-0.157725	-0.0590549	-0.472402	-0.364609	-0.310181	-0.487653	-0.461198	-0.312764	-0.368517	-0.308135
Nlrp10	-0.276065	-0.349371	-0.146652	-0.494406	-0.117989	-0.065796	-0.611494	-0.628693	-0.661273	-0.638674	-0.469711	-0.289197	-0.279207	-0.127963	0.132396	0.00547353	0.0549056	0.246224	-0.3763	-0.343351	0.0289693	-0.0478531	-0.0807949	0.0850455	0.112193	0.181399	0.385782	0.420182	0.584932	-0.0252156	0.206013	0.133248	0.433305	0.472065	0.544251	0.621345	0.372755	0.349234	0.307151	0.435266	0.323795	0.298804	0.525002	0.526215	0.499098	0.478357	0.478791
Nlrp6	0.235175	0.310729	0.0997985	0.451654	0.0340974	0.000258939	0.60965	0.669842	0.689603	0.690391	0.513479	0.340055	0.347398	0.0736914	-0.167552	-0.0147045	-0.0428563	-0.252966	0.356245	0.356926	0.0212747	0.126734	0.169067	-0.00370966	-0.0382228	-0.164211	-0.332363	-0.415173	-0.583155	0.0157345	-0.237725	-0.139855	-0.497095	-0.510673	-0.613956	-0.675701	-0.347396	-0.387438	-0.334508	-0.511624	-0.377214	-0.354225	-0.578903	-0.588528	-0.547733	-0.517815	-0.512898
Nme1	0.162463	0.117865	-0.116226	0.0397265	-0.329602	-0.374358	0.496251	0.787364	0.557456	0.566999	0.292052	0.329418	0.279729	0.122418	0.0933296	0.283545	0.275926	0.0517216	0.387684	0.596148	0.203592	0.376556	0.673997	0.419751	0.31453	0.0641816	0.105701	-0.330914	-0.354432	0.0644469	-0.217586	-0.237827	-0.430869	-0.313717	-0.675626	-0.623635	-0.374022	-0.733624	-0.717326	-0.730857	-0.490727	-0.552649	-0.660973	-0.784487	-0.850433	-0.636398	-0.686086
Nme3	-0.0510211	0.0872277	-0.0421661	0.296762	-0.162992	-0.0727885	0.370935	0.459066	0.585729	0.705137	0.649437	0.446257	0.585323	-0.291772	-0.464393	-0.278732	-0.193474	-0.386005	0.0421474	0.0683191	0.144324	0.299067	0.180141	0.119556	0.115875	-0.157603	-0.200964	-0.237692	-0.444261	-0.0795079	-0.300796	-0.0305275	-0.633413	-0.602156	-0.626762	-0.659061	-0.0129594	-0.135729	-0.0244966	-0.495427	-0.385642	-0.322003	-0.5097	-0.474751	-0.302029	-0.375292	-0.303519
Nme6	-0.00566594	-0.077612	-0.257566	-0.223551	-0.532019	-0.528065	0.278089	0.648622	0.372935	0.430676	0.194958	0.316944	0.297431	-0.0117558	0.0917428	0.284789	0.331542	0.139933	0.226203	0.514054	0.308749	0.507861	0.823071	0.609561	0.49743	0.167277	0.35139	-0.174279	-0.139608	0.0420722	-0.20033	-0.208519	-0.388386	-0.208232	-0.611802	-0.501384	-0.204435	-0.697099	-0.678502	-0.723724	-0.477108	-0.555326	-0.577731	-0.721016	-0.778264	-0.546262	-0.589419
Nmnat3	-0.290703	-0.39536	-0.175299	-0.59385	-0.15239	-0.108372	-0.684997	-0.682347	-0.759917	-0.746977	-0.578545	-0.344893	-0.355236	-0.0982853	0.215432	0.0703489	0.115942	0.331456	-0.390682	-0.33287	0.0389802	-0.0473039	-0.0378026	0.12995	0.14958	0.232352	0.475086	0.469815	0.679084	-0.0123016	0.245608	0.128925	0.519661	0.573307	0.618056	0.715529	0.384769	0.332066	0.272958	0.472331	0.359272	0.316454	0.584121	0.567641	0.509255	0.518038	0.504631
Nmral1	0.0800947	0.158254	-0.0566128	0.277005	-0.231465	-0.20202	0.543003	0.729976	0.712838	0.789066	0.607522	0.469542	0.533789	-0.111113	-0.27091	-0.0510599	-0.00788829	-0.25653	0.25321	0.357188	0.176917	0.362309	0.4238	0.248796	0.195925	-0.097494	-0.136331	-0.357814	-0.522581	-0.0179265	-0.316139	-0.144015	-0.65355	-0.587639	-0.773927	-0.782548	-0.228235	-0.461422	-0.377906	-0.69962	-0.507784	-0.49141	-0.690799	-0.723616	-0.639918	-0.588336	-0.565132
Nolc1	0.178371	0.132543	-0.0912975	0.0562993	-0.281467	-0.33458	0.482706	0.746348	0.526556	0.523908	0.259381	0.294325	0.236451	0.147563	0.111663	0.283844	0.265702	0.0570197	0.387943	0.57572	0.174223	0.328538	0.615874	0.371146	0.271786	0.0560341	0.0800223	-0.323735	-0.343435	0.0681103	-0.195236	-0.229092	-0.385819	-0.283377	-0.622328	-0.578423	-0.377323	-0.697976	-0.68808	-0.674321	-0.451306	-0.511435	-0.61641	-0.733491	-0.805832	-0.600307	-0.651992
Nop10	0.207004	0.154391	-0.0648647	0.072035	-0.233561	-0.30123	0.480963	0.722257	0.501262	0.481201	0.217856	0.256179	0.182617	0.191251	0.14943	0.303993	0.270473	0.0748306	0.405684	0.577037	0.144091	0.279909	0.571488	0.327917	0.230936	0.0525325	0.0576851	-0.325095	-0.33647	0.0775259	-0.170934	-0.228815	-0.335855	-0.246852	-0.573864	-0.53681	-0.398862	-0.68536	-0.685177	-0.627437	-0.416806	-0.479089	-0.58077	-0.696505	-0.783845	-0.577086	-0.635241
Npc1l1	-0.102857	-0.147362	0.0744885	-0.211948	0.261964	0.25267	-0.533651	-0.751737	-0.674913	-0.7335	-0.524521	-0.434622	-0.467857	0.0477543	0.171845	-0.0417257	-0.0714226	0.172454	-0.292072	-0.426519	-0.186494	-0.370219	-0.4981	-0.299672	-0.231705	0.0527608	0.0687875	0.352671	0.479238	-0.00474585	0.291407	0.171283	0.597107	0.515991	0.753102	0.744597	0.269983	0.541191	0.475647	0.714531	0.507491	0.512874	0.688208	0.746696	0.7039	0.606496	0.60336
Nploc4	0.00576782	0.0567664	-0.15369	0.117488	-0.389049	-0.34051	0.469601	0.739641	0.659641	0.761017	0.566877	0.490965	0.560994	-0.162237	-0.242095	-0.00136888	0.0694674	-0.183712	0.210162	0.388153	0.261027	0.479714	0.596624	0.412915	0.341746	-0.0226125	0.0292739	-0.30269	-0.42906	-0.019303	-0.32479	-0.158264	-0.664436	-0.546774	-0.806031	-0.772164	-0.179642	-0.535391	-0.452369	-0.777261	-0.552809	-0.556767	-0.713816	-0.776371	-0.702914	-0.608872	-0.591264
Nqo2	-0.248091	-0.144064	-0.222164	-0.0192256	-0.431332	-0.282942	0.136963	0.339864	0.399104	0.579519	0.555498	0.455354	0.630275	-0.452641	-0.466939	-0.264669	-0.112258	-0.280084	-0.132833	0.00259138	0.286321	0.484821	0.402989	0.377037	0.358889	-0.0298699	0.102977	-0.067903	-0.207259	-0.104229	-0.295853	-0.0085586	-0.613937	-0.498582	-0.594983	-0.553281	0.173082	-0.13439	-0.018009	-0.534449	-0.401718	-0.360714	-0.451853	-0.447647	-0.265833	-0.305911	-0.228058
Nr4a2	0.00260148	0.0634092	-0.136022	0.141646	-0.353875	-0.302228	0.456343	0.700348	0.645936	0.747016	0.570524	0.479422	0.555763	-0.172096	-0.264121	-0.0330152	0.0374039	-0.206062	0.191387	0.348031	0.242034	0.449918	0.537974	0.369993	0.307632	-0.0397821	-0.00234391	-0.294307	-0.429276	-0.0254564	-0.317973	-0.142126	-0.652694	-0.547764	-0.775879	-0.751199	-0.161599	-0.483237	-0.398175	-0.734657	-0.526477	-0.522341	-0.682477	-0.732658	-0.649055	-0.575743	-0.552328
Nrbp2	-0.227521	-0.315789	-0.0816378	-0.474044	0.0116307	0.0342515	-0.664592	-0.753135	-0.774574	-0.792532	-0.598361	-0.407374	-0.430447	-0.0376464	0.218029	0.0342499	0.0497212	0.291216	-0.370463	-0.388328	-0.0535751	-0.186795	-0.229979	-0.0404174	-0.000174655	0.174134	0.33763	0.450059	0.640298	-0.00814358	0.282406	0.152957	0.589572	0.590532	0.715912	0.775828	0.35709	0.435711	0.36878	0.603789	0.44486	0.418157	0.665308	0.677669	0.619113	0.586847	0.57543
Nrep	0.109193	0.219875	0.0486937	0.40427	-0.0320536	-0.00916149	0.504673	0.56252	0.645823	0.699405	0.584506	0.385855	0.455949	-0.0942879	-0.316076	-0.15199	-0.130204	-0.329902	0.210264	0.209406	0.0650452	0.187632	0.141155	0.0252672	0.00930986	-0.174257	-0.298102	-0.337415	-0.530489	-0.0302681	-0.265512	-0.0834773	-0.558702	-0.560189	-0.611112	-0.666251	-0.192638	-0.249586	-0.168553	-0.486671	-0.370988	-0.324584	-0.538171	-0.520552	-0.414063	-0.442298	-0.403935
Nrgn	0.268684	0.371976	0.176157	0.567529	0.168391	0.128913	0.624902	0.603035	0.692533	0.679292	0.535664	0.309004	0.322009	0.0868018	-0.212453	-0.0858681	-0.129301	-0.321307	0.349762	0.280434	-0.0510893	0.0201828	-0.00837555	-0.152708	-0.164627	-0.227247	-0.463146	-0.429246	-0.628459	0.00769033	-0.221196	-0.108153	-0.46996	-0.529274	-0.548377	-0.645411	-0.345024	-0.270498	-0.214945	-0.404915	-0.312277	-0.267149	-0.516912	-0.492988	-0.432799	-0.455238	-0.439188
Nrm	0.208198	0.194563	-0.0320835	0.177608	-0.187134	-0.240051	0.535982	0.743751	0.586055	0.580008	0.332249	0.308376	0.263671	0.14189	0.0433115	0.211415	0.185916	-0.0271435	0.396444	0.531978	0.128092	0.268874	0.495601	0.263743	0.180489	-0.00723005	-0.0431985	-0.361932	-0.423558	0.057491	-0.208354	-0.210853	-0.41924	-0.350482	-0.629322	-0.616459	-0.386916	-0.6282	-0.607799	-0.638424	-0.436671	-0.475129	-0.617867	-0.707264	-0.752767	-0.591145	-0.629682
Nt5dc2	0.23539	0.261749	0.00278292	0.31312	-0.152129	-0.196439	0.654067	0.845838	0.739319	0.7459	0.488032	0.394536	0.374495	0.108693	-0.0628014	0.136461	0.115191	-0.138645	0.431759	0.541547	0.121513	0.281077	0.462834	0.218409	0.141168	-0.0731392	-0.159633	-0.441604	-0.563508	0.0431036	-0.269061	-0.214448	-0.550039	-0.497144	-0.753031	-0.765706	-0.418669	-0.633681	-0.590201	-0.715127	-0.502249	-0.519342	-0.721823	-0.792329	-0.799122	-0.668569	-0.690773
Nudcd1	0.330859	0.372131	0.120967	0.465863	0.0495423	-0.0285842	0.701392	0.787865	0.737705	0.700417	0.461095	0.319275	0.27518	0.205303	-0.0399651	0.114467	0.0502783	-0.177523	0.481628	0.50333	0.00728772	0.110914	0.244885	0.0152327	-0.0411496	-0.141744	-0.329476	-0.481601	-0.624192	0.0549742	-0.225104	-0.196575	-0.465818	-0.47638	-0.647264	-0.705558	-0.478429	-0.538191	-0.507311	-0.572081	-0.40821	-0.409662	-0.640665	-0.68167	-0.697855	-0.60621	-0.630979
Nudt10	0.161511	0.273417	0.126417	0.471767	0.112842	0.111626	0.484286	0.460863	0.578989	0.59806	0.510416	0.295712	0.344279	-0.0228048	-0.274715	-0.158499	-0.167521	-0.328386	0.219076	0.15512	-0.0213932	0.0497137	-0.0301438	-0.121599	-0.120253	-0.206614	-0.388897	-0.329454	-0.519322	-0.0207045	-0.208938	-0.0600487	-0.445718	-0.492021	-0.474799	-0.556898	-0.209911	-0.150695	-0.0855188	-0.335016	-0.266671	-0.212662	-0.425109	-0.386946	-0.29495	-0.350719	-0.31658
Nudt22	0.262427	0.278025	0.0584184	0.320692	-0.0340258	-0.0990495	0.57896	0.699223	0.612442	0.586467	0.364532	0.28003	0.236154	0.173082	0.002824	0.145605	0.0982567	-0.101889	0.412264	0.471681	0.0459831	0.150962	0.309491	0.0987528	0.0375063	-0.0796187	-0.198022	-0.39577	-0.493912	0.0532333	-0.194553	-0.185216	-0.398164	-0.380683	-0.575334	-0.603231	-0.407743	-0.523839	-0.501581	-0.538713	-0.377048	-0.39281	-0.570154	-0.625677	-0.654714	-0.544155	-0.573381
Nudt5	0.156956	0.130712	-0.0771858	0.0861283	-0.250424	-0.290386	0.460691	0.693965	0.516583	0.523018	0.287046	0.295701	0.256743	0.107294	0.055299	0.221119	0.210808	0.0112767	0.346759	0.508699	0.159719	0.306328	0.544114	0.324813	0.238604	0.0302727	0.0413799	-0.308398	-0.346354	0.0528522	-0.196943	-0.202585	-0.393027	-0.303962	-0.598388	-0.56559	-0.335266	-0.618894	-0.600444	-0.629401	-0.426445	-0.472222	-0.583564	-0.681154	-0.728768	-0.557842	-0.596498
Nuf2	0.114464	0.0844183	-0.128367	0.0256102	-0.338949	-0.362617	0.445313	0.724469	0.52587	0.553262	0.309231	0.334921	0.308945	0.0601559	0.0369017	0.224676	0.234361	0.0209469	0.32479	0.524381	0.210729	0.383574	0.638807	0.412913	0.318018	0.0567509	0.110476	-0.294343	-0.327006	0.0461198	-0.220482	-0.210029	-0.439098	-0.322578	-0.652797	-0.601132	-0.30857	-0.659947	-0.634152	-0.697317	-0.472127	-0.523291	-0.625355	-0.7346	-0.774882	-0.589238	-0.62535
Nup205	0.168572	0.141534	-0.0847352	0.0952176	-0.273946	-0.315991	0.50184	0.755791	0.564878	0.57339	0.317455	0.325019	0.284503	0.112328	0.0547881	0.23639	0.226425	0.0084187	0.37515	0.55118	0.175045	0.33562	0.591889	0.353959	0.260536	0.0315616	0.0438146	-0.335776	-0.378852	0.0562498	-0.216464	-0.219556	-0.432307	-0.335213	-0.654502	-0.619053	-0.362346	-0.671465	-0.650257	-0.686924	-0.465923	-0.514875	-0.637072	-0.742461	-0.792086	-0.607715	-0.648755
Nup43	-0.00321444	-0.0520198	-0.246844	-0.160173	-0.525379	-0.511746	0.332268	0.698074	0.451843	0.521521	0.283876	0.368834	0.367604	-0.0443944	0.0242786	0.236396	0.290377	0.0767268	0.233364	0.510689	0.312482	0.524873	0.811919	0.594968	0.486506	0.134015	0.297955	-0.210065	-0.208467	0.030857	-0.236248	-0.207323	-0.465496	-0.290605	-0.68161	-0.582659	-0.208732	-0.694359	-0.661084	-0.768367	-0.515227	-0.58106	-0.633527	-0.766011	-0.797835	-0.584853	-0.616952
Nup93	0.133775	0.129565	-0.10229	0.115417	-0.309286	-0.328368	0.518897	0.783471	0.619838	0.653799	0.405193	0.385406	0.374446	0.0416578	-0.0296286	0.175549	0.186621	-0.0506746	0.346821	0.526585	0.202194	0.384387	0.608523	0.3763	0.286296	0.0128731	0.0315112	-0.344254	-0.415396	0.0371364	-0.256395	-0.210688	-0.516964	-0.41289	-0.724451	-0.69049	-0.328721	-0.657218	-0.617348	-0.737991	-0.508362	-0.545321	-0.685389	-0.781289	-0.797191	-0.633249	-0.658935
Nxf1	-0.0957334	-0.0167365	-0.168359	0.0819046	-0.381822	-0.291814	0.331902	0.558039	0.550573	0.683044	0.567335	0.470709	0.586571	-0.283519	-0.346828	-0.127093	-0.0243808	-0.238218	0.0633989	0.210097	0.258293	0.462191	0.481101	0.36965	0.325264	-0.0379014	0.0354437	-0.206084	-0.34423	-0.0570118	-0.309876	-0.0887559	-0.638914	-0.530846	-0.705059	-0.674607	-0.0294794	-0.343229	-0.245363	-0.654791	-0.477008	-0.457578	-0.591714	-0.619513	-0.496094	-0.469031	-0.423618
Oas1c	-0.0873547	-0.123174	0.0884177	-0.171721	0.278328	0.26758	-0.496857	-0.720942	-0.63328	-0.69227	-0.488826	-0.416383	-0.447082	0.0500104	0.152938	-0.054091	-0.0861782	0.147178	-0.274295	-0.416957	-0.192697	-0.373583	-0.509203	-0.316741	-0.247816	0.035063	0.0338272	0.327324	0.439356	-0.00576687	0.278144	0.167707	0.568422	0.481376	0.723224	0.706939	0.252465	0.534289	0.472934	0.696258	0.492129	0.502052	0.660916	0.72337	0.68684	0.583805	0.583035
Odf2l	0.0992675	0.156405	-0.00665612	0.249306	-0.114384	-0.108145	0.428979	0.542691	0.535334	0.574427	0.435838	0.324802	0.358501	-0.0371171	-0.176416	-0.0253322	-0.0102122	-0.190108	0.219507	0.275594	0.0980255	0.220017	0.265745	0.131772	0.0951048	-0.0878557	-0.147155	-0.285945	-0.410193	-0.00441663	-0.220719	-0.110112	-0.457362	-0.425373	-0.550063	-0.568432	-0.204494	-0.337897	-0.282548	-0.488645	-0.355481	-0.34257	-0.499204	-0.519997	-0.468655	-0.432151	-0.419903
Ofd1	0.0182938	-0.141468	0.000198469	-0.391451	0.102102	0.0152616	-0.433377	-0.490409	-0.653242	-0.768756	-0.713315	-0.467912	-0.613039	0.286049	0.507759	0.31832	0.240505	0.445184	-0.0679447	-0.0625975	-0.115792	-0.266325	-0.115723	-0.0533983	-0.0573021	0.202653	0.291161	0.281597	0.519938	0.0836178	0.318078	0.02757	0.673049	0.663188	0.657776	0.711769	0.0393434	0.115243	-0.00364894	0.496831	0.393403	0.316485	0.537182	0.486871	0.29847	0.39493	0.316174
Oip5	0.162782	0.168021	-0.0522731	0.176261	-0.219375	-0.248368	0.520206	0.732682	0.602384	0.62057	0.390382	0.347772	0.331497	0.0697756	-0.0308397	0.151159	0.147134	-0.0728223	0.349645	0.48675	0.151196	0.306292	0.497546	0.281323	0.203889	-0.0183427	-0.0410327	-0.348252	-0.428968	0.0378792	-0.233828	-0.193827	-0.473846	-0.398906	-0.662282	-0.648558	-0.335575	-0.590205	-0.554475	-0.657389	-0.455691	-0.483117	-0.631835	-0.710549	-0.724984	-0.586286	-0.609876
Olfr157	-0.0639827	0.0320842	-0.0901863	0.168768	-0.234843	-0.155824	0.307319	0.442409	0.496973	0.60708	0.533427	0.400554	0.512629	-0.25232	-0.357118	-0.18045	-0.0983574	-0.275559	0.0451169	0.118699	0.174302	0.330318	0.283962	0.209863	0.189603	-0.0874344	-0.0760267	-0.194105	-0.345983	-0.0602388	-0.266862	-0.050927	-0.556238	-0.496543	-0.580762	-0.58256	-0.0175739	-0.205318	-0.113589	-0.499976	-0.375491	-0.338362	-0.479833	-0.475564	-0.345041	-0.367128	-0.315333
Olfr424	0.141594	0.226792	0.0380571	0.371162	-0.0575634	-0.0540788	0.529288	0.617996	0.64984	0.688118	0.539531	0.373828	0.417184	-0.0350074	-0.238295	-0.0713214	-0.0627515	-0.269706	0.26347	0.289639	0.0749354	0.201926	0.216122	0.0703006	0.0391724	-0.143688	-0.256313	-0.35523	-0.523813	-0.00956277	-0.256798	-0.115013	-0.536311	-0.525005	-0.626348	-0.669666	-0.247866	-0.340794	-0.272629	-0.527836	-0.391403	-0.36289	-0.567436	-0.572944	-0.500105	-0.486408	-0.465377
Olfr666	-0.0830268	0.0265618	-0.137026	0.177727	-0.339627	-0.241777	0.393076	0.593266	0.633357	0.773896	0.663983	0.515747	0.651168	-0.311773	-0.426198	-0.193658	-0.0880289	-0.320104	0.0709368	0.18879	0.243005	0.451617	0.424321	0.315923	0.280904	-0.08833	-0.0537806	-0.247622	-0.427639	-0.0700912	-0.342376	-0.0800711	-0.710808	-0.620081	-0.76033	-0.750872	-0.0352262	-0.312052	-0.198701	-0.673776	-0.49976	-0.462139	-0.633905	-0.642265	-0.48842	-0.493736	-0.434457
Olfr78	-0.0444988	0.124869	0.0212446	0.391585	-0.0445027	0.0503852	0.355242	0.36213	0.566551	0.681115	0.671777	0.416493	0.571322	-0.308557	-0.529035	-0.370239	-0.290895	-0.45965	0.00398	-0.0380004	0.080979	0.203166	-0.000163362	-0.0200188	0.00202878	-0.216883	-0.314974	-0.229537	-0.466969	-0.0952906	-0.284307	0.0125727	-0.606715	-0.617506	-0.549578	-0.613676	0.0224913	0.00885371	0.12617	-0.376875	-0.31358	-0.225073	-0.430446	-0.358233	-0.15666	-0.290994	-0.202973
Olfr959	-0.129861	-0.232707	-0.0820563	-0.409896	-0.0370946	-0.045766	-0.466486	-0.484327	-0.575612	-0.608469	-0.51106	-0.318971	-0.372733	0.0504193	0.27198	0.140316	0.13544	0.305197	-0.205621	-0.176658	-0.0206707	-0.111706	-0.0563797	0.0430396	0.0508663	0.17709	0.32057	0.31468	0.492947	0.0224433	0.222056	0.0695393	0.469862	0.491709	0.51067	0.57452	0.193222	0.193956	0.126233	0.388193	0.300525	0.254534	0.454158	0.429434	0.338592	0.375302	0.342468
Ormdl2	-0.0985735	-0.0188245	-0.167799	0.0809518	-0.379392	-0.288389	0.326045	0.549407	0.544733	0.67764	0.565177	0.467989	0.584942	-0.286364	-0.349148	-0.131125	-0.0278367	-0.239412	0.0582132	0.202936	0.256811	0.459228	0.474445	0.365994	0.32279	-0.0385664	0.0348701	-0.202099	-0.340235	-0.0580806	-0.308052	-0.0859243	-0.635361	-0.528271	-0.698534	-0.66849	-0.0243367	-0.334865	-0.236884	-0.64755	-0.472244	-0.452002	-0.584957	-0.61132	-0.486635	-0.462172	-0.41596
Osbpl1a	-0.066838	-0.133119	0.0839706	-0.229202	0.27747	0.246698	-0.528646	-0.743175	-0.699911	-0.779834	-0.588592	-0.472992	-0.533717	0.113292	0.248779	0.0228747	-0.025033	0.226232	-0.252092	-0.380517	-0.200784	-0.395748	-0.483174	-0.300198	-0.239672	0.0722076	0.0852612	0.346892	0.49706	0.0143812	0.316839	0.153728	0.652344	0.570494	0.785397	0.7807	0.226046	0.498075	0.417094	0.727849	0.523529	0.515835	0.702523	0.747477	0.672781	0.602187	0.58371
Osbpl5	0.0191974	-0.00567905	0.200823	-0.0183778	0.46306	0.414634	-0.42269	-0.736024	-0.606818	-0.710602	-0.504638	-0.476591	-0.53592	0.157662	0.186215	-0.0562499	-0.132879	0.114981	-0.20091	-0.419891	-0.296816	-0.525069	-0.689566	-0.497079	-0.413502	-0.0285841	-0.128849	0.26927	0.361078	0.0108961	0.312176	0.171556	0.633343	0.489185	0.794904	0.736145	0.169657	0.587229	0.51307	0.800834	0.560848	0.582133	0.707537	0.791855	0.740144	0.611653	0.604567
Osbpl9	-0.189392	-0.273346	-0.0816672	-0.423272	-0.0141353	0.00140475	-0.557567	-0.614268	-0.653311	-0.669967	-0.5181	-0.342311	-0.368511	-0.0203612	0.207463	0.0565543	0.06875	0.268513	-0.299974	-0.299509	-0.0331737	-0.13999	-0.153286	-0.00381536	0.0237008	0.162367	0.312088	0.377836	0.548117	-0.0011691	0.238066	0.117774	0.498942	0.508824	0.591975	0.649983	0.288794	0.331558	0.27184	0.485964	0.362119	0.332583	0.546625	0.547345	0.487788	0.477013	0.462002
Osgep	0.0244262	0.0646704	-0.0935986	0.116925	-0.255833	-0.226644	0.365071	0.550001	0.49815	0.565487	0.420885	0.355669	0.40265	-0.101015	-0.174831	-0.00157733	0.0429711	-0.143547	0.170915	0.289483	0.175414	0.32993	0.411755	0.274473	0.224068	-0.0290099	-0.00898797	-0.23725	-0.335597	-0.0113135	-0.236386	-0.117533	-0.484482	-0.407353	-0.588992	-0.571735	-0.149879	-0.390072	-0.330405	-0.561208	-0.400234	-0.40101	-0.52477	-0.567355	-0.515253	-0.449842	-0.437842
Ost4	0.163651	0.241994	-0.0025544	0.371338	-0.15825	-0.157432	0.643183	0.810294	0.789895	0.839409	0.627329	0.468757	0.508831	-0.0296942	-0.236175	-0.0166011	-0.00174589	-0.266635	0.342732	0.425338	0.137337	0.313501	0.393774	0.189223	0.132737	-0.126837	-0.219846	-0.429854	-0.607875	0.000329754	-0.319014	-0.16957	-0.660422	-0.61519	-0.805725	-0.83343	-0.322032	-0.51527	-0.438406	-0.719261	-0.521444	-0.506082	-0.736844	-0.77142	-0.706015	-0.643824	-0.63086
Ostc	0.111116	0.141929	-0.0914826	0.183202	-0.295897	-0.293059	0.546527	0.791847	0.683379	0.738953	0.50948	0.43968	0.462116	-0.0275929	-0.13675	0.0844269	0.111795	-0.140404	0.316724	0.474109	0.203795	0.396637	0.560441	0.343843	0.265728	-0.0316169	-0.0327804	-0.361143	-0.474744	0.0140217	-0.293869	-0.190288	-0.599344	-0.505184	-0.777582	-0.758855	-0.294519	-0.600657	-0.539751	-0.755059	-0.531169	-0.546988	-0.716795	-0.790118	-0.762846	-0.639982	-0.64523
P2rx7	0.0883444	0.119407	0.297418	0.209635	0.602356	0.551008	-0.274992	-0.661892	-0.439783	-0.54763	-0.337543	-0.415336	-0.453886	0.15581	0.0655465	-0.164524	-0.254399	-0.0376203	-0.148484	-0.442835	-0.360273	-0.595317	-0.843569	-0.652172	-0.549168	-0.139535	-0.345667	0.166011	0.177015	-0.00322679	0.264657	0.182113	0.52528	0.331051	0.712059	0.601258	0.11683	0.644005	0.591689	0.792363	0.537347	0.592979	0.637384	0.76092	0.75373	0.564569	0.577528
P2ry4	-0.116252	0.01796	-0.0622241	0.215933	-0.167021	-0.0598843	0.237453	0.304369	0.447931	0.576025	0.569648	0.387903	0.538663	-0.337347	-0.467506	-0.311342	-0.212674	-0.361612	-0.0543786	-0.0367025	0.140659	0.275056	0.122438	0.108828	0.117901	-0.136022	-0.146846	-0.145975	-0.32957	-0.0924943	-0.259761	0.0105406	-0.549155	-0.518223	-0.503379	-0.526842	0.0831692	-0.0222345	0.0849257	-0.382143	-0.306111	-0.239603	-0.385811	-0.339799	-0.159499	-0.25592	-0.177167
P4ha1	0.0684794	0.231321	0.110738	0.503812	0.0965808	0.146744	0.438114	0.389222	0.596146	0.662786	0.632848	0.359766	0.473143	-0.17847	-0.451959	-0.320471	-0.287688	-0.450121	0.102857	0.0132531	-0.00115028	0.0842376	-0.104506	-0.144652	-0.120083	-0.252528	-0.4288	-0.293069	-0.533111	-0.0677373	-0.251311	-0.00527586	-0.54036	-0.591644	-0.502349	-0.59542	-0.0856435	-0.00707818	0.09144	-0.317601	-0.270645	-0.183786	-0.413304	-0.33737	-0.170016	-0.298944	-0.227374
P4ha2	0.201386	0.306131	0.10082	0.491619	0.0359426	0.0252418	0.611646	0.65673	0.724434	0.747322	0.593559	0.382019	0.421258	0.00224086	-0.26226	-0.0978403	-0.107857	-0.325628	0.313404	0.297368	0.0273344	0.141581	0.128583	-0.0242745	-0.0474954	-0.196575	-0.372488	-0.414379	-0.614937	-0.00685301	-0.266223	-0.116804	-0.560064	-0.579419	-0.64663	-0.718232	-0.300592	-0.325677	-0.254476	-0.516127	-0.389502	-0.348406	-0.591477	-0.581157	-0.501239	-0.508737	-0.48488
P4htm	-0.185518	-0.243876	-0.0143482	-0.3449	0.118711	0.136134	-0.604021	-0.752671	-0.714534	-0.741525	-0.533745	-0.400976	-0.416485	-0.0273914	0.162162	-0.0288825	-0.026043	0.212138	-0.350583	-0.424075	-0.107544	-0.25818	-0.357487	-0.158004	-0.102063	0.109511	0.206408	0.406124	0.556103	-0.0149627	0.273983	0.168284	0.565921	0.529839	0.715238	0.74205	0.335045	0.500594	0.441396	0.645468	0.464201	0.457977	0.66627	0.705516	0.668431	0.594887	0.594036
Pacs1	-0.0729463	-0.0809119	0.144288	-0.0780385	0.377274	0.368763	-0.488016	-0.776702	-0.625041	-0.688398	-0.453453	-0.429521	-0.447526	0.040086	0.0953116	-0.128618	-0.166919	0.0786686	-0.292261	-0.490825	-0.244306	-0.448435	-0.65118	-0.431659	-0.342945	-0.0191416	-0.0714116	0.319175	0.400316	-0.0178185	0.283751	0.197845	0.573786	0.451667	0.765513	0.720959	0.268434	0.638594	0.583824	0.775833	0.5383	0.569238	0.705804	0.7983	0.78633	0.634654	0.647124
Pagr1a	0.192098	0.246793	0.0274747	0.344008	-0.0901739	-0.113112	0.583433	0.71487	0.680202	0.698697	0.499707	0.370769	0.379622	0.0446405	-0.143103	0.0333368	0.0237876	-0.200356	0.345635	0.407317	0.0889439	0.225685	0.320636	0.129466	0.0772467	-0.109626	-0.21345	-0.393452	-0.536174	0.0179579	-0.254235	-0.161259	-0.525494	-0.49782	-0.66889	-0.698915	-0.332317	-0.47406	-0.420697	-0.600552	-0.432033	-0.426046	-0.626907	-0.662997	-0.632496	-0.562945	-0.564315
Pam	-0.325486	-0.399184	-0.181043	-0.551236	-0.166592	-0.0972407	-0.666835	-0.668596	-0.701489	-0.662269	-0.477695	-0.28448	-0.260038	-0.176868	0.111475	-0.0129392	0.0538569	0.252395	-0.426789	-0.378465	0.0556036	-0.0134682	-0.0548458	0.126219	0.154429	0.19981	0.437716	0.460303	0.632599	-0.0358008	0.204965	0.146253	0.431893	0.48462	0.555439	0.644723	0.426049	0.374007	0.336335	0.438613	0.326253	0.301303	0.545237	0.546237	0.529849	0.504834	0.511099
Panx1	0.162897	0.215229	0.0373262	0.308793	-0.048739	-0.0672824	0.484921	0.576859	0.564594	0.578604	0.422079	0.302992	0.313421	0.0348072	-0.132812	0.00864596	-0.000998066	-0.183164	0.281501	0.318022	0.0600436	0.167023	0.228387	0.0771908	0.0390927	-0.104639	-0.203813	-0.327603	-0.453524	0.0118545	-0.208652	-0.12567	-0.432874	-0.419112	-0.542042	-0.574203	-0.271032	-0.365291	-0.319549	-0.475951	-0.345231	-0.334905	-0.506767	-0.528899	-0.497508	-0.452442	-0.45024
Paqr6	-0.127128	-0.0818131	-0.243799	-0.0469259	-0.511096	-0.419169	0.302267	0.608024	0.524692	0.66644	0.51897	0.484362	0.588748	-0.284594	-0.28244	-0.0434801	0.0711359	-0.153482	0.0689059	0.285463	0.325691	0.558031	0.653776	0.515678	0.448484	0.0321792	0.175646	-0.182785	-0.281059	-0.0455416	-0.314636	-0.119885	-0.641158	-0.488064	-0.746757	-0.679327	-0.0320106	-0.456851	-0.366142	-0.743404	-0.527577	-0.533169	-0.634551	-0.69781	-0.60111	-0.517906	-0.486733
Pard3b	-0.169315	-0.26229	-0.0496426	-0.421477	0.0531546	0.0542131	-0.598123	-0.693705	-0.726655	-0.764291	-0.595188	-0.410811	-0.454061	0.024475	0.254562	0.0708021	0.0660268	0.296387	-0.304948	-0.331378	-0.0768231	-0.215298	-0.235616	-0.0698191	-0.0345578	0.16154	0.293224	0.402189	0.588897	0.00714265	0.282701	0.131351	0.590408	0.58067	0.694374	0.744528	0.288484	0.385859	0.312256	0.58497	0.433319	0.402656	0.632127	0.639169	0.562815	0.544852	0.523786
Park7	-0.00445536	-0.0149544	-0.20916	-0.0582373	-0.465876	-0.437998	0.369611	0.691937	0.513751	0.595001	0.381067	0.405258	0.43191	-0.0916761	-0.0773259	0.140246	0.200752	-0.0214551	0.214019	0.448791	0.28789	0.49793	0.713612	0.515992	0.424261	0.0741114	0.195377	-0.235346	-0.280643	0.0104262	-0.263226	-0.182568	-0.52769	-0.377219	-0.709399	-0.636017	-0.187563	-0.615206	-0.563873	-0.751739	-0.51581	-0.556959	-0.645286	-0.748415	-0.739282	-0.576351	-0.588604
Parn	-0.0624896	-0.194281	-0.0253653	-0.406926	0.0722455	0.0234796	-0.498591	-0.56609	-0.677096	-0.757905	-0.657538	-0.437049	-0.538318	0.172673	0.399067	0.215667	0.170203	0.382306	-0.166009	-0.16971	-0.0937765	-0.235533	-0.15373	-0.050522	-0.0393822	0.187138	0.296932	0.329896	0.545976	0.0512019	0.29882	0.0687577	0.629523	0.622636	0.661955	0.715931	0.14305	0.220065	0.121251	0.521788	0.401865	0.343774	0.567305	0.539477	0.398812	0.449563	0.395118
Parp3	-0.215799	-0.330332	-0.0979917	-0.531414	-0.0140481	-0.00530884	-0.682064	-0.747263	-0.813805	-0.844228	-0.667656	-0.437725	-0.483494	0.00665901	0.293584	0.103254	0.109796	0.357901	-0.348246	-0.342493	-0.0453746	-0.180823	-0.175081	-0.000176466	0.0292185	0.210719	0.395108	0.461153	0.682597	0.00817859	0.303972	0.134885	0.638256	0.651482	0.739939	0.814094	0.332726	0.38193	0.301033	0.599287	0.450019	0.406679	0.675624	0.668814	0.579526	0.581094	0.554819
Pax2	-0.021484	0.0495285	-0.104183	0.146848	-0.274302	-0.216417	0.364748	0.544112	0.539138	0.635193	0.513398	0.410671	0.495111	-0.18895	-0.281642	-0.0905332	-0.0218209	-0.220203	0.120206	0.229456	0.193819	0.364092	0.390302	0.272688	0.232399	-0.0581043	-0.0368819	-0.233875	-0.366464	-0.0372319	-0.273035	-0.0946211	-0.56403	-0.486799	-0.637976	-0.627097	-0.0937785	-0.333603	-0.252413	-0.582727	-0.424763	-0.407198	-0.549066	-0.572836	-0.476725	-0.448242	-0.415198
Pax9	0.032094	-0.034662	0.111827	-0.123892	0.282392	0.222933	-0.340895	-0.52213	-0.51289	-0.609632	-0.492857	-0.399381	-0.483265	0.192424	0.273052	0.0863972	0.0158403	0.207187	-0.107034	-0.219798	-0.196679	-0.364692	-0.392873	-0.280366	-0.240243	0.048705	0.0176885	0.217443	0.342101	0.0374267	0.264879	0.0909246	0.546601	0.466542	0.61806	0.60306	0.0807326	0.324837	0.245779	0.56876	0.413773	0.398194	0.530291	0.555389	0.461793	0.431803	0.399503
Paxbp1	-0.179742	-0.233192	-0.0133965	-0.326154	0.113987	0.132382	-0.576958	-0.720403	-0.68009	-0.704237	-0.50383	-0.380037	-0.392406	-0.031583	0.147587	-0.0341594	-0.03011	0.19695	-0.338279	-0.409994	-0.102523	-0.245894	-0.345224	-0.153005	-0.0986213	0.101977	0.193764	0.388079	0.528807	-0.0160451	0.259675	0.162656	0.536032	0.500973	0.681138	0.705897	0.323721	0.483402	0.428239	0.616747	0.442819	0.438322	0.63587	0.674996	0.642604	0.569316	0.569981
Pcbp1	0.19574	0.151351	-0.0936763	0.0777763	-0.298216	-0.354461	0.534546	0.816196	0.585953	0.584523	0.298442	0.32736	0.267994	0.15513	0.107268	0.296404	0.277256	0.0475672	0.422307	0.621105	0.18648	0.354817	0.658594	0.393523	0.287317	0.0520274	0.0713364	-0.358586	-0.387285	0.071619	-0.217605	-0.247117	-0.431366	-0.323182	-0.685144	-0.641141	-0.410461	-0.752096	-0.738635	-0.735242	-0.493837	-0.555918	-0.676415	-0.800095	-0.873268	-0.655863	-0.709525
Pcca	-0.11773	-0.163105	0.00887057	-0.23802	0.122111	0.1261	-0.443685	-0.570132	-0.539227	-0.569949	-0.414988	-0.318292	-0.338558	0.00610842	0.13881	-0.0131089	-0.0208051	0.162622	-0.247353	-0.314534	-0.100317	-0.223492	-0.297589	-0.148986	-0.105355	0.0750907	0.131712	0.296641	0.410003	-0.00589716	0.216213	0.125352	0.446098	0.409383	0.556834	0.570688	0.233512	0.38095	0.331946	0.506817	0.364333	0.359651	0.513201	0.544538	0.509545	0.453564	0.449732
Pcdhb12	0.110175	0.0228789	0.16432	-0.0887108	0.369896	0.272706	-0.313159	-0.52529	-0.537265	-0.674661	-0.574644	-0.468132	-0.593315	0.305052	0.372174	0.156814	0.0494342	0.256603	-0.0385326	-0.17392	-0.252517	-0.452121	-0.447276	-0.350009	-0.312111	0.0473863	-0.0231403	0.193055	0.337642	0.0647018	0.308322	0.0744996	0.637316	0.534703	0.687304	0.660847	0.0041753	0.301607	0.200116	0.628684	0.461587	0.435735	0.569789	0.588468	0.453534	0.442991	0.391337
Pcdhb16	-0.0110469	-0.140556	0.062525	-0.336324	0.240048	0.166368	-0.537994	-0.703041	-0.769418	-0.888241	-0.749325	-0.546679	-0.670083	0.246962	0.442357	0.200423	0.121622	0.38362	-0.169195	-0.247916	-0.19427	-0.397794	-0.361278	-0.223222	-0.189965	0.15065	0.196111	0.350051	0.571079	0.0597252	0.368048	0.101883	0.767774	0.70856	0.833318	0.856593	0.13655	0.351155	0.234291	0.711057	0.531823	0.483733	0.712663	0.71091	0.556117	0.570441	0.512791
Pcdhb17	-0.00735814	-0.104433	0.0901141	-0.245631	0.277788	0.215677	-0.486179	-0.677504	-0.692487	-0.799909	-0.650536	-0.500253	-0.600189	0.207795	0.354441	0.12536	0.0527613	0.2981	-0.172435	-0.280028	-0.206825	-0.404993	-0.420387	-0.274954	-0.23103	0.100392	0.110672	0.315284	0.493649	0.0436891	0.334849	0.11471	0.694206	0.618522	0.780914	0.783924	0.142098	0.392623	0.292772	0.695827	0.511089	0.482536	0.675568	0.694976	0.57454	0.552747	0.511034
Pcdhb18	0.011733	-0.12863	0.0528645	-0.34173	0.212173	0.128825	-0.495252	-0.632013	-0.729604	-0.853198	-0.743595	-0.528742	-0.664311	0.275409	0.473516	0.245	0.160908	0.405494	-0.124973	-0.182078	-0.17874	-0.369726	-0.294311	-0.183014	-0.161488	0.163673	0.214053	0.320988	0.547762	0.0708444	0.356358	0.0758039	0.746193	0.698173	0.783323	0.813238	0.0924953	0.273195	0.153245	0.649658	0.492832	0.435078	0.65893	0.641811	0.471776	0.513485	0.446929
Pcdhb19	-0.040678	-0.135297	0.0610223	-0.277709	0.229666	0.181434	-0.503717	-0.674091	-0.691509	-0.783274	-0.630956	-0.476165	-0.562952	0.167141	0.328607	0.111271	0.0534898	0.293121	-0.198316	-0.288793	-0.178348	-0.36225	-0.379675	-0.231199	-0.189229	0.110994	0.145486	0.329589	0.507099	0.0353808	0.320274	0.117385	0.664775	0.603044	0.754727	0.767002	0.171174	0.388558	0.295422	0.666219	0.489885	0.461591	0.659591	0.676737	0.567275	0.54567	0.508959
Pcdhb20	-0.197433	-0.298185	-0.0706526	-0.473404	0.027537	0.0346863	-0.64937	-0.737246	-0.778768	-0.811753	-0.631787	-0.428341	-0.469829	0.00887383	0.265831	0.0755466	0.0775421	0.320823	-0.336834	-0.353029	-0.06546	-0.205592	-0.222883	-0.0460594	-0.0107396	0.182154	0.338142	0.437946	0.640083	0.00491101	0.295934	0.139507	0.619001	0.617609	0.728879	0.789016	0.320781	0.403233	0.326844	0.607145	0.451095	0.416672	0.666535	0.670661	0.591783	0.576523	0.555123
Pcdhb21	-0.0141247	-0.154301	0.0286905	-0.371246	0.172405	0.099187	-0.510862	-0.629605	-0.73203	-0.844031	-0.733047	-0.511959	-0.63858	0.245994	0.458074	0.238282	0.165375	0.406076	-0.144391	-0.186438	-0.155696	-0.335637	-0.258739	-0.145799	-0.126481	0.174571	0.245623	0.333436	0.561699	0.0652978	0.34644	0.0769038	0.726512	0.690336	0.764748	0.802969	0.114296	0.26692	0.151338	0.626445	0.476755	0.418118	0.647522	0.627395	0.464037	0.508032	0.444478
Pcf11	-0.21302	-0.219417	-0.0318596	-0.242239	0.0586137	0.112228	-0.481865	-0.601287	-0.512163	-0.493176	-0.299318	-0.241012	-0.202454	-0.143297	-0.0139374	-0.139317	-0.102757	0.068944	-0.347717	-0.413464	-0.0546468	-0.150157	-0.2998	-0.116463	-0.0598843	0.0521103	0.136072	0.328615	0.403369	-0.0467857	0.166327	0.162723	0.338824	0.31384	0.496428	0.511755	0.343071	0.466274	0.448497	0.475389	0.330398	0.348858	0.491605	0.545977	0.575286	0.47029	0.497584
Pclo	-0.0914762	0.088981	-0.0522374	0.361826	-0.191593	-0.0682074	0.417295	0.508412	0.690191	0.846046	0.802604	0.542821	0.728414	-0.395538	-0.606733	-0.385385	-0.271497	-0.496278	0.00774816	0.026852	0.173289	0.357914	0.178001	0.12642	0.131124	-0.202464	-0.253245	-0.265131	-0.525218	-0.109813	-0.365748	-0.015141	-0.772367	-0.739173	-0.739493	-0.782292	0.0290552	-0.10359	0.0382279	-0.568778	-0.449571	-0.36285	-0.588941	-0.533594	-0.304491	-0.417776	-0.3203
Pcmtd2	-0.195759	-0.173652	0.0620275	-0.139079	0.241908	0.291545	-0.53893	-0.780497	-0.597353	-0.598499	-0.335825	-0.328916	-0.283997	-0.133076	-0.0533551	-0.235308	-0.216837	0.00731582	-0.401742	-0.565112	-0.158644	-0.315661	-0.568775	-0.323857	-0.231479	-0.0142778	-0.0032538	0.362283	0.415591	-0.0596199	0.220524	0.224568	0.441838	0.35478	0.667615	0.641738	0.390135	0.678337	0.657075	0.690378	0.469874	0.515979	0.652888	0.75501	0.805436	0.624129	0.665989
Pcolce2	-0.204521	-0.290717	-0.136721	-0.451789	-0.128832	-0.102278	-0.493148	-0.475713	-0.553217	-0.547453	-0.437403	-0.252963	-0.269137	-0.0544273	0.184318	0.0813171	0.11163	0.265254	-0.268113	-0.212509	0.0367761	-0.0222934	0.00848018	0.119543	0.127541	0.18348	0.368932	0.338211	0.500655	-0.00201921	0.180596	0.0820139	0.383899	0.430311	0.44128	0.518591	0.26348	0.205583	0.158327	0.324013	0.250995	0.212644	0.412482	0.390895	0.336548	0.35968	0.343759
Pcyox1l	0.0778822	0.170195	-0.0458366	0.312444	-0.2156	-0.179977	0.558676	0.733183	0.739617	0.821537	0.647242	0.4873	0.562698	-0.131327	-0.310256	-0.0861261	-0.0393233	-0.29311	0.246385	0.337371	0.171533	0.358402	0.395155	0.225917	0.178405	-0.118441	-0.170816	-0.368186	-0.550614	-0.0258004	-0.328841	-0.136156	-0.682011	-0.623222	-0.790939	-0.807937	-0.220371	-0.437185	-0.346279	-0.700775	-0.513038	-0.487875	-0.70089	-0.723801	-0.624382	-0.589978	-0.5593
Pde10a	-0.149692	-0.0952181	-0.245618	-0.0471114	-0.508275	-0.405839	0.277599	0.572622	0.509394	0.659548	0.529686	0.485844	0.60278	-0.315854	-0.31426	-0.0778635	0.044773	-0.173508	0.0365458	0.24457	0.3253	0.555769	0.6258	0.50372	0.443086	0.0245891	0.170314	-0.165224	-0.270176	-0.0554235	-0.315474	-0.10393	-0.644452	-0.494287	-0.732007	-0.666815	0.00144567	-0.412721	-0.316907	-0.720685	-0.514763	-0.513531	-0.613371	-0.66739	-0.556318	-0.490672	-0.451867
Pde8b	-0.103218	-0.0874377	0.113749	-0.0524213	0.309051	0.324872	-0.431468	-0.685059	-0.518415	-0.55038	-0.32719	-0.332624	-0.318902	-0.0358582	0.00151255	-0.179898	-0.193336	0.0124918	-0.297785	-0.475716	-0.195925	-0.361041	-0.579635	-0.372237	-0.287413	-0.036034	-0.0767316	0.284989	0.331168	-0.0359156	0.219749	0.190671	0.440423	0.335835	0.631382	0.589305	0.281361	0.600497	0.56926	0.659766	0.450684	0.491183	0.598727	0.693129	0.716514	0.55668	0.583781
Pdgfc	-0.106977	-0.018267	-0.170246	0.0949186	-0.386275	-0.288225	0.336951	0.561579	0.568249	0.709016	0.59863	0.489394	0.616243	-0.308431	-0.379514	-0.153437	-0.0440009	-0.262951	0.051576	0.195236	0.263482	0.472679	0.475421	0.368392	0.32677	-0.0480324	0.0239414	-0.208622	-0.358277	-0.0644608	-0.322439	-0.0831018	-0.666066	-0.558299	-0.724107	-0.696192	-0.0160339	-0.329465	-0.224883	-0.664801	-0.486975	-0.461911	-0.603304	-0.625548	-0.488893	-0.472575	-0.420945
Pdia4	0.150547	0.163108	-0.0664871	0.180528	-0.249602	-0.269647	0.539935	0.76854	0.640596	0.67063	0.434753	0.38389	0.378732	0.0420314	-0.0625249	0.135869	0.141402	-0.0936225	0.348029	0.495549	0.171654	0.342222	0.530875	0.309042	0.22923	-0.021704	-0.0373598	-0.359979	-0.451904	0.0317503	-0.257515	-0.197798	-0.522888	-0.439696	-0.713288	-0.697165	-0.331128	-0.608991	-0.564936	-0.703681	-0.489959	-0.514913	-0.67299	-0.752474	-0.755078	-0.617031	-0.635862
Pdia5	0.301178	0.361858	0.173889	0.491571	0.17393	0.104905	0.582005	0.570232	0.598688	0.554313	0.393834	0.226575	0.196221	0.179802	-0.0759879	0.0224922	-0.0448257	-0.21078	0.383245	0.331163	-0.0663391	-0.0167868	0.0214225	-0.136031	-0.159195	-0.177036	-0.396215	-0.40324	-0.549245	0.0366633	-0.165107	-0.12751	-0.348665	-0.402742	-0.457309	-0.539496	-0.384805	-0.319028	-0.291666	-0.35586	-0.264995	-0.244299	-0.455784	-0.455695	-0.449883	-0.427602	-0.436735
Pdia6	0.251973	0.267004	0.0261523	0.304248	-0.100831	-0.158627	0.615037	0.77784	0.670134	0.657911	0.412795	0.332547	0.295501	0.150805	-0.0132398	0.157427	0.12127	-0.105467	0.428586	0.519577	0.08685	0.219649	0.401982	0.169935	0.0977659	-0.0679484	-0.165382	-0.417799	-0.521124	0.0519849	-0.228334	-0.204964	-0.465922	-0.427322	-0.662606	-0.679424	-0.420149	-0.594282	-0.56432	-0.631897	-0.441213	-0.461591	-0.647238	-0.715093	-0.739959	-0.610915	-0.640084
Pdk1	-0.188058	-0.286739	-0.105805	-0.462796	-0.0594781	-0.0481378	-0.5508	-0.574866	-0.648432	-0.665491	-0.533957	-0.334683	-0.370136	-0.00655692	0.241509	0.0999172	0.112476	0.30361	-0.280471	-0.252298	-0.00958768	-0.104708	-0.080093	0.0515294	0.0680222	0.188019	0.359142	0.373974	0.55908	0.00717996	0.234296	0.0987544	0.494372	0.520864	0.564866	0.635912	0.269938	0.269474	0.205658	0.440365	0.335268	0.294435	0.516735	0.501187	0.426701	0.443089	0.419957
Pdk2	-0.086897	-0.0350412	0.171142	0.0645726	0.404533	0.426127	-0.396302	-0.711744	-0.473096	-0.504266	-0.253804	-0.321061	-0.287954	-0.0578729	-0.0812043	-0.269432	-0.285952	-0.0793343	-0.308857	-0.543341	-0.242485	-0.423083	-0.715589	-0.485656	-0.381106	-0.101572	-0.199535	0.259505	0.261989	-0.0516346	0.208467	0.218234	0.410067	0.270436	0.637607	0.563938	0.291805	0.696082	0.677406	0.711922	0.47533	0.540709	0.613377	0.740194	0.797235	0.584401	0.628431
Pdlim1	0.297353	0.407522	0.219753	0.620592	0.245707	0.196062	0.630324	0.565094	0.680423	0.652296	0.521782	0.276601	0.283148	0.115837	-0.208922	-0.101834	-0.159538	-0.337715	0.357386	0.252465	-0.0950831	-0.0468429	-0.099941	-0.233008	-0.235077	-0.253257	-0.525378	-0.435736	-0.642396	0.00982169	-0.201808	-0.0961013	-0.432706	-0.516774	-0.497466	-0.611718	-0.356285	-0.219555	-0.168288	-0.339159	-0.269049	-0.216677	-0.474371	-0.436981	-0.377626	-0.419233	-0.402505
Pdx1	-0.0697514	-0.193744	-0.0323166	-0.39533	0.0552515	0.0133483	-0.479472	-0.538209	-0.643307	-0.715236	-0.61827	-0.408121	-0.499976	0.151039	0.370101	0.199145	0.16052	0.3606	-0.166425	-0.165559	-0.0810767	-0.211757	-0.135907	-0.0362922	-0.0259457	0.180272	0.291401	0.318062	0.522647	0.0458063	0.27958	0.066801	0.589273	0.586499	0.621847	0.675578	0.145575	0.20993	0.118243	0.488199	0.376217	0.321468	0.535156	0.508549	0.37877	0.426156	0.376236
Pdzd11	-0.0781143	-0.0285112	-0.200718	0.0205976	-0.44522	-0.369682	0.351143	0.629142	0.557168	0.681429	0.526248	0.472664	0.564668	-0.238199	-0.269315	-0.0379477	0.0585013	-0.168346	0.111619	0.302832	0.289508	0.508512	0.600292	0.454032	0.389739	0.00633062	0.109375	-0.218891	-0.327921	-0.0372475	-0.309351	-0.125721	-0.632015	-0.498974	-0.742157	-0.691135	-0.0780177	-0.45803	-0.371313	-0.725727	-0.516743	-0.518976	-0.639063	-0.696666	-0.606965	-0.52847	-0.500885
Pemt	0.122782	0.131355	-0.0948218	0.137773	-0.294765	-0.305723	0.515325	0.765171	0.626098	0.666585	0.431603	0.394051	0.395186	0.0164161	-0.067094	0.138026	0.154334	-0.0817931	0.327148	0.493449	0.196544	0.377291	0.573464	0.353142	0.269954	-0.00393004	0.00636758	-0.34143	-0.426057	0.0279429	-0.262681	-0.197625	-0.532118	-0.434838	-0.723427	-0.696169	-0.30813	-0.618716	-0.572456	-0.723398	-0.502306	-0.530583	-0.677793	-0.762824	-0.762885	-0.618331	-0.63602
Pex5l	-0.0945964	0.0276948	-0.11956	0.200547	-0.301956	-0.197424	0.368145	0.537322	0.610383	0.753182	0.668224	0.502153	0.64802	-0.332143	-0.458184	-0.237407	-0.129599	-0.348335	0.0392659	0.132046	0.222789	0.418872	0.353102	0.267129	0.24358	-0.107796	-0.0868079	-0.23109	-0.421258	-0.0796825	-0.334129	-0.0574188	-0.69668	-0.620166	-0.720647	-0.721193	-0.00403817	-0.241487	-0.124722	-0.619127	-0.466017	-0.417919	-0.5912	-0.583656	-0.41496	-0.447633	-0.379932
Pfn1	-0.0684515	-0.0083963	-0.188126	0.0591163	-0.429673	-0.353045	0.381454	0.651777	0.594563	0.720529	0.563726	0.491266	0.588664	-0.243441	-0.295003	-0.0575522	0.0385669	-0.197323	0.121589	0.30335	0.283972	0.505648	0.584415	0.43578	0.373762	-0.0123071	0.0748852	-0.239607	-0.364237	-0.040501	-0.322766	-0.125787	-0.661298	-0.534365	-0.768729	-0.725573	-0.0874375	-0.455539	-0.363519	-0.739373	-0.529464	-0.525825	-0.661544	-0.713378	-0.614306	-0.545002	-0.513395
Pglyrp1	0.116224	0.144692	-0.0775592	0.184265	-0.2656	-0.267361	0.524681	0.75096	0.648708	0.696463	0.477572	0.409847	0.42693	-0.0131509	-0.121565	0.0847269	0.105964	-0.131728	0.309116	0.45311	0.184422	0.362995	0.519236	0.312542	0.238976	-0.0334161	-0.0422805	-0.347578	-0.455186	0.0159876	-0.274418	-0.181589	-0.559767	-0.474811	-0.730097	-0.715278	-0.289053	-0.569186	-0.513499	-0.707618	-0.497672	-0.512785	-0.675644	-0.744563	-0.722192	-0.605552	-0.612145
Pglyrp2	0.12901	0.240408	0.0809352	0.430841	0.0290266	0.0424858	0.492187	0.514936	0.613957	0.653461	0.551763	0.346546	0.408239	-0.0662145	-0.299733	-0.156594	-0.147227	-0.329339	0.210699	0.18277	0.0285081	0.12886	0.0667038	-0.0372796	-0.0454355	-0.18764	-0.335292	-0.331365	-0.522769	-0.0268551	-0.240737	-0.0721349	-0.509221	-0.529702	-0.550308	-0.61668	-0.196613	-0.203845	-0.129427	-0.419379	-0.324753	-0.274857	-0.486951	-0.460118	-0.359102	-0.400045	-0.363056
Pgm2	0.172467	0.105444	0.232024	0.0368432	0.472649	0.360277	-0.232195	-0.493476	-0.466289	-0.620764	-0.523621	-0.464796	-0.594739	0.345198	0.348717	0.127988	0.000482947	0.199178	0.0109012	-0.171085	-0.305481	-0.520926	-0.54667	-0.45439	-0.407219	-0.00825701	-0.145925	0.134529	0.246641	0.0675006	0.3019	0.0747569	0.619428	0.483175	0.675088	0.618423	-0.0484986	0.324511	0.225452	0.650053	0.469929	0.45755	0.552785	0.589058	0.461163	0.426814	0.378148
Pgp	0.33888	0.335509	0.0909556	0.355678	0.00793151	-0.090543	0.646694	0.767017	0.645162	0.588189	0.329154	0.256243	0.176115	0.271768	0.0863157	0.223547	0.146527	-0.0614393	0.500661	0.559331	0.0190679	0.114393	0.323299	0.0783676	0.00651013	-0.0769835	-0.224486	-0.445626	-0.53168	0.0799388	-0.180504	-0.218691	-0.366926	-0.35769	-0.581864	-0.615076	-0.501245	-0.605238	-0.598694	-0.55605	-0.383081	-0.411688	-0.598416	-0.669081	-0.735407	-0.591977	-0.640323
Phf5a	0.14895	0.211407	-0.040359	0.310402	-0.224344	-0.222304	0.633847	0.842107	0.78405	0.838877	0.609328	0.480056	0.515071	-0.0312665	-0.206968	0.0242373	0.045381	-0.227253	0.347948	0.466074	0.17234	0.364353	0.483199	0.26377	0.1955	-0.0931637	-0.151922	-0.421841	-0.581763	0.00583216	-0.324432	-0.18636	-0.66787	-0.599758	-0.833847	-0.843371	-0.325537	-0.575914	-0.50178	-0.769841	-0.551362	-0.548207	-0.76473	-0.817148	-0.764143	-0.673705	-0.667557
Phka2	0.082334	0.0185071	0.155855	-0.058464	0.35065	0.273657	-0.294926	-0.505058	-0.485683	-0.601346	-0.491931	-0.415612	-0.513467	0.242428	0.291081	0.0949338	0.00510588	0.196049	-0.0640291	-0.202651	-0.234716	-0.417735	-0.448611	-0.343864	-0.300807	0.024135	-0.047381	0.183132	0.29897	0.0466596	0.273187	0.0852243	0.562094	0.46145	0.628784	0.597508	0.0341008	0.324719	0.240501	0.591384	0.42845	0.415607	0.530606	0.561032	0.458573	0.424637	0.387958
Phldb2	-0.0844811	-0.102409	0.07894	-0.123963	0.242454	0.241685	-0.417556	-0.616457	-0.521078	-0.563362	-0.381428	-0.337252	-0.351008	0.0163374	0.0914951	-0.0802038	-0.101332	0.0935996	-0.24761	-0.3778	-0.164061	-0.315156	-0.45379	-0.282572	-0.219064	0.0142719	0.00681507	0.275654	0.356428	-0.0136704	0.224892	0.151671	0.457492	0.37954	0.601318	0.582082	0.230453	0.479695	0.434864	0.591177	0.413928	0.430176	0.556037	0.617872	0.602596	0.499066	0.506029
Phyhd1	-0.310305	-0.313944	-0.0815732	-0.342752	0.00137198	0.0878127	-0.615667	-0.731542	-0.624988	-0.578367	-0.336205	-0.258995	-0.19188	-0.236438	-0.0568258	-0.192921	-0.126093	0.0756396	-0.464536	-0.520335	-0.0251073	-0.120995	-0.30834	-0.0789829	-0.0123324	0.0786616	0.216753	0.423339	0.512954	-0.0699134	0.181745	0.203641	0.370512	0.360226	0.568868	0.600993	0.463606	0.566264	0.5547	0.538676	0.373278	0.396633	0.578319	0.641995	0.69475	0.56569	0.606823
Pigb	0.292384	0.359128	0.124718	0.491742	0.0630025	0.00682046	0.675322	0.737049	0.736175	0.717386	0.510812	0.337635	0.322532	0.138591	-0.121835	0.0330401	-0.0149569	-0.237728	0.425146	0.424725	0.00448782	0.107536	0.182447	-0.018055	-0.060323	-0.169336	-0.362742	-0.462273	-0.629284	0.0330296	-0.237702	-0.165859	-0.495949	-0.515648	-0.640579	-0.708322	-0.419209	-0.45208	-0.407003	-0.540795	-0.39461	-0.378617	-0.617893	-0.637079	-0.61799	-0.566787	-0.573591
Pigf	-0.0918084	-0.00837985	-0.161758	0.098218	-0.372258	-0.28194	0.341845	0.562599	0.562519	0.695187	0.58032	0.475688	0.593656	-0.28521	-0.357069	-0.13629	-0.0340846	-0.250141	0.0659422	0.20712	0.254072	0.457657	0.469627	0.358591	0.31579	-0.0461368	0.0198517	-0.212992	-0.357313	-0.0584704	-0.31366	-0.0874884	-0.647495	-0.542975	-0.711221	-0.684523	-0.031968	-0.337878	-0.238142	-0.65529	-0.478751	-0.456587	-0.596586	-0.621267	-0.493973	-0.471879	-0.424688
Pik3c3	-0.242115	-0.275194	-0.0590754	-0.344553	0.0327718	0.0839273	-0.579877	-0.690961	-0.632972	-0.620217	-0.412274	-0.30496	-0.280193	-0.130266	0.0538763	-0.0957291	-0.0592378	0.145372	-0.386422	-0.43574	-0.0495132	-0.159662	-0.284942	-0.0862536	-0.0318154	0.0990007	0.222055	0.395109	0.51272	-0.0396866	0.211487	0.171301	0.435604	0.421633	0.594525	0.628339	0.379536	0.486514	0.453334	0.541029	0.384144	0.389045	0.577327	0.620857	0.626458	0.538388	0.556259
Pik3ip1	-0.260726	-0.22786	-0.0186135	-0.189326	0.0894527	0.172911	-0.508141	-0.668413	-0.503829	-0.460038	-0.219971	-0.212817	-0.132942	-0.2348	-0.135249	-0.259972	-0.202385	-0.0251965	-0.422325	-0.525094	-0.0644206	-0.162086	-0.400096	-0.175954	-0.0981389	0.00555156	0.0732824	0.348407	0.383708	-0.0780628	0.146509	0.206492	0.291429	0.249519	0.502287	0.500422	0.421307	0.591437	0.59461	0.520823	0.349428	0.394619	0.520276	0.60801	0.689124	0.523308	0.576859
Pik3r5	0.183868	0.304745	0.13658	0.519388	0.116359	0.112745	0.546268	0.528296	0.650562	0.670705	0.56613	0.332123	0.382863	-0.0185263	-0.295959	-0.163701	-0.174765	-0.357309	0.253327	0.188706	-0.0189468	0.0632677	-0.0147556	-0.122866	-0.124523	-0.224723	-0.424411	-0.371567	-0.579942	-0.0201172	-0.234354	-0.0732218	-0.499013	-0.546943	-0.538609	-0.627411	-0.243085	-0.187288	-0.11592	-0.387183	-0.305532	-0.248382	-0.484459	-0.446387	-0.348501	-0.402898	-0.367413
Pilra	0.0190468	0.0178833	-0.171157	-0.00494688	-0.399946	-0.378845	0.380662	0.665508	0.513877	0.584616	0.382126	0.385287	0.409545	-0.0730614	-0.0849542	0.118785	0.168631	-0.0447602	0.220115	0.423215	0.251461	0.443928	0.634092	0.446093	0.3634	0.0473797	0.135544	-0.245037	-0.30142	0.0102711	-0.251947	-0.171649	-0.507203	-0.378355	-0.67572	-0.618463	-0.196273	-0.570302	-0.520335	-0.701803	-0.484278	-0.517362	-0.616439	-0.706404	-0.693884	-0.550372	-0.560224
Pink1	-0.13879	-0.163847	0.0609555	-0.201104	0.23883	0.250415	-0.537433	-0.753642	-0.64884	-0.686049	-0.462667	-0.39472	-0.401867	-0.0157993	0.100163	-0.0994284	-0.110767	0.124204	-0.328934	-0.464815	-0.168198	-0.338656	-0.500869	-0.289921	-0.216318	0.0374584	0.060007	0.357754	0.463039	-0.0225749	0.265172	0.18573	0.540732	0.463119	0.716004	0.705832	0.310932	0.574102	0.5234	0.693446	0.486821	0.503471	0.668724	0.738101	0.724887	0.605069	0.616
Pkmyt1	0.323196	0.36566	0.129828	0.462075	0.0734209	-0.0035853	0.668598	0.735594	0.698165	0.658341	0.436025	0.293758	0.250628	0.20282	-0.0396952	0.100827	0.0355212	-0.176547	0.459078	0.467099	-0.00783642	0.0831062	0.200413	-0.0134389	-0.0633382	-0.144564	-0.335555	-0.459957	-0.599025	0.0522856	-0.208255	-0.182048	-0.432047	-0.450676	-0.598947	-0.660511	-0.457152	-0.49236	-0.463903	-0.521574	-0.373703	-0.372066	-0.594901	-0.62869	-0.643157	-0.563707	-0.58644
Plac8l1	-0.0312078	-0.105847	0.0724655	-0.215055	0.236003	0.193996	-0.443104	-0.615254	-0.60964	-0.692372	-0.547146	-0.426028	-0.498739	0.144841	0.272111	0.0740748	0.0208312	0.237062	-0.181455	-0.279987	-0.174958	-0.345479	-0.382963	-0.242599	-0.198927	0.0804496	0.0941649	0.289146	0.436186	0.0273896	0.285486	0.113845	0.590504	0.524281	0.682285	0.683843	0.156757	0.378363	0.298037	0.616171	0.449026	0.430876	0.59887	0.623931	0.535046	0.499928	0.47176
Plat	-0.0352843	-0.187835	-0.116337	-0.443528	-0.136296	-0.188399	-0.314403	-0.226077	-0.446635	-0.505096	-0.520993	-0.271165	-0.380529	0.179462	0.419121	0.330764	0.299931	0.41055	-0.0312995	0.080709	0.031911	-0.0179623	0.196907	0.19334	0.155119	0.235466	0.398932	0.210417	0.421399	0.0707352	0.191309	-0.0321892	0.417028	0.480705	0.345053	0.436101	0.0179529	-0.107231	-0.192939	0.171405	0.166431	0.0791778	0.267478	0.180508	0.0204186	0.168838	0.0970394
Plbd1	-0.219602	-0.298501	-0.0562407	-0.438493	0.0581132	0.0797197	-0.667047	-0.785347	-0.781619	-0.803987	-0.595406	-0.421634	-0.442108	-0.0356222	0.202377	0.00772804	0.0186341	0.268972	-0.378262	-0.420949	-0.0789724	-0.225282	-0.295	-0.0928436	-0.0440172	0.153509	0.29534	0.450492	0.631253	-0.0116614	0.290586	0.166337	0.604008	0.589047	0.745949	0.794117	0.363429	0.482893	0.416609	0.647504	0.472092	0.45323	0.694094	0.718739	0.667309	0.615541	0.608373
Plbd2	-0.000236645	-0.0841767	0.0559452	-0.208816	0.186557	0.134738	-0.361994	-0.487908	-0.522285	-0.606157	-0.50695	-0.377645	-0.461484	0.172426	0.295403	0.126309	0.0694902	0.25058	-0.114208	-0.179405	-0.144795	-0.289161	-0.274949	-0.177065	-0.150925	0.0920993	0.111134	0.234716	0.380191	0.0399021	0.253476	0.0738294	0.527594	0.47953	0.577721	0.587581	0.0911994	0.256501	0.177069	0.501118	0.37249	0.343155	0.494544	0.498578	0.395639	0.397435	0.359627
Plcb3	-0.232875	-0.316367	-0.0886989	-0.468245	-0.00461765	0.0228587	-0.649598	-0.729055	-0.748649	-0.759938	-0.569889	-0.384941	-0.401613	-0.0529137	0.198741	0.0250681	0.0457222	0.277474	-0.369266	-0.381588	-0.0422076	-0.166177	-0.210977	-0.0254941	0.0133124	0.17088	0.336987	0.440799	0.623473	-0.0115801	0.267584	0.150028	0.558815	0.564134	0.683544	0.744256	0.357533	0.423329	0.361468	0.574949	0.423442	0.398407	0.638736	0.650787	0.599317	0.566571	0.557953
Plcg1	0.207401	0.202017	0.319173	0.242687	0.60677	0.504222	-0.133227	-0.477422	-0.340124	-0.488954	-0.364319	-0.412335	-0.508609	0.306577	0.202212	-0.0128926	-0.143264	0.0376089	0.0164304	-0.246444	-0.366338	-0.59252	-0.727364	-0.614403	-0.540737	-0.118262	-0.349917	0.0654619	0.0971685	0.0426558	0.261009	0.105689	0.523962	0.33736	0.62629	0.519201	-0.0533534	0.436139	0.362388	0.678411	0.470081	0.497396	0.522516	0.606498	0.53607	0.423913	0.402715
[truncated: 506 more rows]
